# Supplementary material for: Conservation and Evolution of Cis-Regulatory Systems in Ascomycete Fungi
Source: PLoS Biol. 2004 Nov 9;2(12):e398. doi: 10.1371/journal.pbio.0020398 (PMC526180; doi:10.1371/journal.pbio.0020398)
Supplement: Dataset S17 — (433 KB XLS). [file pbio.0020398.sd017.xls]

## Sheet: Smik_yeastConsensiEnrichment_50
UID	ABF1	ACE2	ADR1	AFT1	ARO80	ASH1	AZF1	BAS1	YAP1	CAT8	CBF1	CHA4	CRZ1	CUP2	DAL80	GATA	ECM22	FKH1	FLO8	FZF1	GAL4	GAT1	GATGAG1	GATGAG2	GCN4	GCR1	GLN3	GZF3	HAC1	HAP1	HAP4	HCM1	HSF1	IME1	INO2/4	LEU3	LYS14	MAC1	MAL63	MATALPHA	MCB	MCM1	MCM1-2	MCM1-3	MET30/31	MIG1	MOT3	MSN2/4	MTsite1
Cluster_ABF1
Cluster_ACE2	0.793916	1.00559	0.498467	0.611819	1	0.994789	0.101856	0.930742	0.423001	0.222726	1	1	0.110671	0.11265	0.911243	0.995349	0.427559	0.599632	1	1	0.0125649	0.739577	0.326304	0.289423	0.914829	0.251037	0.675159	0.94829	0.00155675	0.538713	0.96449	1	0.15348	1	1	1	0.19129	0.313837	0.208182	1.00001	0.382223	0.736576	1.00559	1.00559	0.452462	0.217594	0.804989	0.0250327	0.493557
Cluster_adata-aAlpha	1	1.00257	0.999978	0.353434	1	0.956434	0.626421	1	0.882586	1	1	1	1	0.533429	0.809922	0.684082	1	0.775011	1	1	1	1	1	0.939807	1	0.919219	0.729458	0.996595	1	1	0.883274	1	0.899994	1	1	1	1	0.0934783	0.999964	1	1	0.0782641	1.00257	1.00257	1	0.911487	0.999999	1	0.720015
Cluster_adata-ARG3	0.794508	1.0043	0.513834	1	1	0.841572	0.791669	1.2708e-10	0.417078	1	1	1	1	0.0220921	0.030331	0.0212235	0.0958877	0.69641	1	1	1	0.598901	1	0.625412	2.2152e-08	0.725091	0.555312	0.161804	1	1	0.0274491	1	0.12027	1	1	1	0.15059	0.215609	0.169278	1.00001	0.986103	0.314262	1.0043	1.0043	1	0.887548	0.296145	0.136386	0.0436706
Cluster_adata-CalciumSpecific	0.999979	1.0155	0.999996	0.925493	0.699135	0.999456	0.993898	0.994231	0.912904	0.662771	0.793095	0.802668	0.204414	0.975185	0.774969	0.575032	0.763535	0.450411	1	1	1	1	0.962416	0.999663	0.978788	0.99868	0.721264	0.998719	1	0.880364	0.999919	1	0.816705	1	1	1	1	0.604066	0.999928	1.00012	0.829189	0.697197	1.0155	1.0155	0.808504	0.999397	1	0.536348	0.580707
Cluster_adata-Chaperones	0.188405	1.00516	0.99475	1	1	0.916832	0.0618573	1	0.353182	0.790881	1	0.640444	0.414247	0.826982	0.930379	0.954093	1	0.305219	1	1	1	0.979162	1	0.581638	0.957541	0.549541	0.874359	0.871798	0.081146	0.510348	0.593558	1	0.000253552	0.0371637	0.0501094	1	1	0.281119	0.77345	1.00001	0.7046	0.451136	1.00516	1.00516	1	0.598091	0.988478	0.163877	0.921879
Cluster_adata-EGT2	0.928786	1.00581	0.962215	1	0.365284	0.499204	0.85732	0.937521	0.664691	0.514453	1	1	0.117878	0.00967565	0.459486	0.972714	0.786902	0.00965911	1	1	0.405066	0.991583	1	0.845148	0.688092	0.753934	0.0670356	0.449037	0.418928	0.186039	0.216508	1	0.0836159	1	1	1	0.0197929	0.700444	0.624188	1.00002	0.79088	0.760167	1.00581	1.00581	1	0.407649	0.995906	0.954484	0.0475984
Cluster_adata-ENA1	0.859714	1.00343	0.99999	1	1	0.999194	1	1	1	0.647362	0.486782	1	1	0.506863	0.997828	0.963156	1	1	1	1	1	1	1	0.976453	1	0.987573	0.970263	0.999332	1	1	0.999952	1	0.796388	1	1	1	1	1	0.986861	1.00001	0.842216	1	1.00343	1.00343	1	0.972417	1	0.993026	0.816974
Cluster_adata-ERD2	0.86604	1.00193	0.795648	0.278882	1	0.589006	0.712934	1	0.799305	1	1	1	1	1	0.942502	0.843595	1	0.673197	1	1	1	0.980537	1	1	1	0.978204	0.790841	0.662252	1	1	0.666353	1	1	1	1	1	1	1	0.867425	1	0.853644	0.748741	1.00193	1.00193	1	0.798313	0.986975	1	1
Cluster_adata-G1DNAreplication	0.99703	1.00559	0.989868	1	0.354476	0.960373	0.832615	0.930742	1	1	1	0.295078	1	0.734099	0.550951	0.546993	0.774307	0.360926	1	1	1	0.999772	1	0.982271	0.972272	0.982514	0.675159	0.796092	1	1	0.578343	1	0.0266573	1	1	1	1	1	0.992983	1.00001	0.900917	0.00194131	1.00559	1.00559	1	0.922211	0.999919	0.943982	0.936871
Cluster_adata-OAC1	0.79052	1.0015	0.978031	1	1	0.828897	0.87341	0.511925	0.71315	0.365906	1	1	1	0.196272	0.977261	0.763705	1	1	1	1	1	0.999366	1	0.805689	0.547037	0.932222	0.911551	0.957579	1	0.187698	0.987023	1	1	1	1	1	1	1	0.838996	1	1	1	1.0015	1.0015	1	0.663711	0.999642	1	1
Cluster_adata-Respiration	0.295342	1.00886	0.978747	0.775676	1	0.921032	0.929132	0.204223	0.994125	0.48231	0.0243257	0.0891123	1	0.928415	0.693049	0.504221	0.904752	0.530888	1	1	0.546051	0.999989	1	0.884386	0.714637	0.963217	0.803672	0.909009	0.19518	0.338312	0.00345936	1	0.589325	0.411839	1	1	1	0.263785	0.6573	1.00004	0.251514	0.363401	1.00886	1.00886	1	0.208957	0.999998	0.104387	0.396094
Cluster_adata-RET3	0.839095	1.00733	0.996259	0.71019	0.436092	0.82767	0.516513	0.857456	0.982485	0.891319	0.758355	0.765588	1	0.911958	0.719654	0.627132	0.857487	0.364497	1	1	1	0.999671	0.790885	0.742064	0.878718	0.99809	0.27333	0.988077	1	1	0.994597	1	0.731617	1	1	1	1	1	0.816124	1.00003	0.0476131	0.880925	1.00733	1.00733	1	0.916094	0.999893	0.997734	0.679087
Cluster_adata-Secretion	0.392914	1.00646	0.999032	1	1	0.829469	0.677725	0.333564	0.96778	1	1	0.721809	0.487783	0.704399	0.869656	0.681145	0.23057	0.470911	1	1	1	0.996639	1	0.780625	0.46917	0.941594	0.819369	0.919967	0.453049	1	0.947137	1	0.915468	0.321517	1	1	1	1	0.621666	1.00002	0.855704	0.990102	1.00646	1.00646	1	0.967597	0.992923	0.998933	0.958788
Cluster_adata-TRP4	0.602298	1.00322	0.990678	1	1	0.991603	0.331642	2.63446e-05	0.0832414	1	1	1	1	0.238483	0.649343	0.548454	0.575887	0.845145	1	1	1	0.984035	1	0.85209	0.000696054	0.674301	0.256733	0.918601	0.260077	1	0.96554	1	0.50047	1	1	1	1	0.487686	0.973929	1	0.144137	0.153535	1.00322	1.00322	1	0.867853	0.998741	0.990483	0.796444
Cluster_adata-TUB	0.648551	1.00343	0.950514	1	1	0.939452	0.816714	1	0.498593	0.647362	0.136616	0.141306	0.0470122	0.906984	0.529891	0.82781	0.599499	0.0310913	1	1	1	0.979832	1	1	0.795113	0.753103	0.524274	0.563548	1	1	0.670633	1	0.953647	1	1	1	1	0.151994	0.986861	1.00001	0.0689535	0.686436	1.00343	1.00343	1	0.745469	0.987794	0.993026	1
Cluster_ADR1	0.939367	1.00603	0.782541	1	1	0.718798	0.271803	1	0.693587	0.0958198	0.0254603	0.696959	1	0.907309	0.0721622	0.0611818	0.798796	0.416499	1	0.0411188	0.416433	0.701449	1	0.865343	0.723921	0.391773	0.438176	0.250945	1	0.565445	0.564258	1	0.889563	1	1	1	1	1	0.718415	1.00002	0.647847	0.782018	1.00603	1.00603	0.477326	0.457096	0.181741	0.318403	1
Cluster_ARG80	0.630085	1.00451	0.84548	1	1	0.461111	0.933298	0.141036	0.113928	0.745586	0.210197	0.591282	1	0.334222	0.368184	0.350544	0.699302	0.722224	1	1	1	0.830615	1	0.952247	0.619908	0.995619	0.251661	0.94998	1	1	0.362172	1	0.982291	1	1	1	1	0.608183	0.994704	1.00001	0.595155	0.348679	1.00451	1.00451	0.385059	0.792999	0.968145	0.998528	0.892477
Cluster_ARG81	0.690838	1.00365	0.979658	1	1	0.961524	0.848899	0.019683	0.792058	0.669642	0.507777	0.515185	1	0.167194	0.781745	0.638444	1	0.879301	1	1	1	0.89463	1	0.897615	0.413632	0.998574	0.913377	0.930998	1	1	0.875258	1	0.590256	1	1	1	1	0.531472	0.506141	1.00001	0.41796	0.00604173	1.00365	1.00365	0.32527	0.790215	0.925491	0.99489	0.2405
Cluster_Arginine	0.351757	1.00322	0.990678	1	1	0.991603	0.988124	0.000254027	0.729607	1	1	0.472008	1	0.694708	0.649343	0.0445626	1	1	1	1	1	0.984035	1	0.85209	0.0158264	0.979735	0.994497	0.972187	1	1	0.897811	1	0.104536	0.176041	1	1	1	1	0.430012	1	0.959447	0.153535	1.00322	1.00322	1	0.867853	0.945671	0.805745	0.454034
Cluster_ARO80	0.988587	1.0043	0.871366	0.516852	1	0.366657	0.405075	0.593365	0.657184	0.728411	0.1951	1	1	0.864418	0.797755	0.748368	0.681554	0.418741	1	1	1	0.990488	1	0.819555	0.369552	0.975726	0.740415	0.678808	1	1	0.628224	1	0.261578	0.227651	1	0.0460169	1	0.590265	0.830699	1.00001	0.769087	0.556423	1.0043	1.0043	1	0.106483	0.668519	0.449567	0.880402
Cluster_ASH1	0.977753	1.00733	0.753474	0.34329	0.0183423	0.901346	0.516513	0.425298	0.93308	0.162963	0.406587	0.765588	1	0.224532	0.452962	0.0852814	0.570644	0.920088	1	1	0.480264	0.974405	0.454757	0.98307	0.769974	0.0967723	0.908059	0.556325	1	0.0758017	0.866587	1	0.731617	0.355838	1	0.077074	1	0.182779	0.174117	1.00003	0.000756346	0.0992561	1.00733	1.00733	1	0.428618	0.9969	0.574229	0.0169919
Cluster_Asparagine	1	1.0015	0.999816	1	1	1	1	0.511925	1	1	1	1	1	0.834507	0.977261	0.763705	1	1	1	1	1	0.999999	1	1	0.86261	0.991307	0.911551	0.999591	1	1	0.987023	1	1	1	1	1	1	0.267903	0.999618	1	0.775596	0.658386	1.0015	1.0015	1	1	1	1	1
Cluster_Autophagy	1	1.00193	0.795648	1	1	0.330306	0.712934	0.602449	0.170231	0.443366	0.312664	0.318155	1	0.0326872	0.303544	0.225701	0.402089	0.673197	1	1	1	0.528721	0.338402	0.878384	0.692027	0.730289	0.517486	0.149735	1	0.234585	0.666353	1	1	1	1	1	1	1	0.670047	1	0.853644	1	1.00193	1.00193	1	0.958034	0.578716	0.445197	0.614973
Cluster_AZF1	0.499494	1.00494	0.197278	0.196925	1	0.182756	0.369336	0.670538	0.750115	0.776755	1	1	0.401013	0.021039	0.0194853	0.119468	0.0356328	0.513628	1	1	1	0.52735	1	0.737664	0.855894	0.468993	0.104115	0.0823191	0.370137	0.495523	0.0522013	1	0.37282	1	1	1	0.171184	0.641712	0.339057	1.00001	0.952513	0.654853	1.00494	1.00494	0.412953	0.546472	0.60348	0.602847	0.411634
Cluster_BAS1	0.98572	1.00408	0.98856	0.498918	0.273569	0.626469	0.996369	2.42569e-07	1	1	0.547237	1	1	0.65414	0.87227	0.483136	0.662762	0.905933	1	1	1	0.863933	1	0.929799	6.94501e-05	0.471761	0.987805	0.736319	1	1	0.720549	1	1	1	1	1	1	0.571532	0.746255	1.00001	0.904621	0.946033	1.00408	1.00408	0.0686682	0.860645	0.902508	0.786994	1
Cluster_Biotin	1	1.00085	0.999011	1	1	1	1	1	0.127205	1	1	1	1	0.222641	1	1	1	1	1	1	1	0.998801	1	1	1	1	1	1	1	1	1	1	1	1	1	1	1	1	0.896	1	1	1	1.00085	1.00085	1	1	0.999226	1	1
Cluster_CAD1	0.977645	1.00365	0.643319	0.461041	0.248667	0.898987	0.666515	0.225609	0.000552321	0.290871	0.507777	1	0.31516	0.336599	0.0476015	0.392701	0.242659	1	1	1	1	0.67467	1	0.720513	0.224474	0.661635	0.204207	0.494718	0.0436959	0.396741	0.375222	1	0.160691	0.19708	1	1	1	1	0.145148	1.00001	1	0.214227	1.00365	1.00365	1	0.0986609	0.735345	0.488703	1
Cluster_CBF1	0.499494	1.00494	0.611292	0.00811326	1	0.182756	0.876049	0.17969	0.90961	0.00239771	5.97043e-18	0.248068	1	0.799555	0.962204	0.8298	0.731897	0.942885	1	1	1	0.982555	0.275813	0.540485	0.0371336	0.468993	0.938059	0.670103	1	0.144307	0.35615	1	0.92909	0.257077	1	0.0527509	1	1	0.190055	1.00001	0.670687	0.859183	1.00494	1.00494	0.412953	0.217934	0.990428	0.602847	0.194884
Cluster_CHA4	0.916532	1.00559	0.924683	1	0.354476	0.271461	0.832615	0.101872	0.990426	1	1	0.669903	1	0.11265	0.825149	0.546993	1	0.599632	1	1	0.393479	0.902693	0.697483	0.657548	0.300563	0.143334	0.915643	0.339147	1	1	0.918537	1	0.484152	1	1	1	1	0.686727	0.89725	1.00001	0.996162	0.51654	1.00559	1.00559	0.452462	0.8291	0.804989	0.729592	0.113186
Cluster_CIN5	0.995574	1.01283	0.988644	1	0.630937	0.861984	0.229738	0.693583	0.154569	0.894488	0.434492	0.919884	0.373945	0.35186	0.221319	0.120132	0.847926	0.999372	1	1	1	0.999494	0.49735	0.462588	0.378669	0.450552	0.465379	0.80887	0.695908	0.828319	0.838714	1	0.327079	1	1	1	1	0.735358	0.150547	1.00008	0.721706	0.863271	1.01283	1.01283	0.746331	0.804197	0.999873	0.516521	0.237567
Cluster_CRZ1	0.648551	1.00343	0.950514	1	1	0.324982	0.942466	0.47079	0.942582	0.647362	0.486782	1	1	0.738057	0.529891	0.346421	0.599499	0.284902	1	1	1	0.700548	1	0.679267	0.583483	0.987573	0.524274	0.95462	0.274812	0.378505	0.994987	1	0.953647	1	1	1	1	0.510066	0.957302	1.00001	0.842216	1	1.00343	1.00343	1	0.896096	0.757715	0.652334	1
Cluster_CUP9	0.931234	1.0043	0.999022	1	1	0.366657	0.917673	0.123102	0.0936924	1	0.1951	0.573452	1	0.289717	0.297344	0.310359	0.681554	0.916961	1	1	1	0.990488	1	0.625412	0.203653	0.725091	0.555312	0.916205	1	1	0.782099	1	0.470857	1	1	1	1	1	0.830699	1.00001	0.33594	0.143803	1.0043	1.0043	1	0.962372	0.994901	0.932487	0.880402
Cluster_DAL81	0.846135	1.00473	0.817522	0.183861	1	0.921378	0.697914	0.0560061	0.721625	0.0103631	0.600604	0.00175104	0.387483	0.579272	0.440456	0.0981028	1	0.746161	1	1	0.344861	0.941205	1	0.867544	0.152085	0.0217551	0.817054	0.103859	1	0.00339752	0.610101	1	1	1	1	1	1	0.248289	0.109603	1.00001	0.419535	0.080795	1.00473	1.00473	0.0130067	0.0853915	0.992138	0.957065	0.0628634
Cluster_DAL82	0.181141	1.00603	0.62197	1	0.375912	0.718798	0.985966	0.943637	0.956516	0.534252	0.689285	0.326222	0.464348	0.794008	0.979676	0.793097	0.465744	0.651124	1	1	1	0.961426	0.724142	0.049905	0.384455	0.978412	0.981197	0.906522	0.430529	0.565445	0.275806	1	0.554442	1	1	1	1	0.120257	0.833914	1.00002	0.647847	0.578072	1.00603	1.00603	0.477326	0.621195	0.920789	0.188486	0.308722
Cluster_DIG1	0.859714	1.00343	0.439865	1	1	0.852064	0.389617	0.806248	0.942582	0.647362	1	1	1	0.014949	0.866427	0.963156	0.599499	0.284902	1	1	1	0.700548	1	1	0.795113	0.376671	0.73401	0.882582	0.274812	0.378505	0.47628	1	0.796388	1	1	1	1	0.510066	0.574528	1.00001	0.370238	0.4026	1.00343	1.00343	1	0.329158	0.757715	0.952333	0.488495
Cluster_DOT6	0.763524	1.00908	0.9892	0.444938	1	0.0304098	0.660207	0.925935	0.704017	0.752457	0.827268	1	1	0.488284	0.377011	0.82058	0.686115	0.739597	1	1	1	0.998277	1	0.897958	0.988077	0.987525	0.333363	0.46846	1	1	0.888423	1	0.453973	1	1	1	1	0.552167	0.615714	1.00004	0.844582	0.239717	1.00908	1.00908	0.622686	0.914252	0.98961	0.826335	0.242747
Cluster_DrugResistance	0.945253	1.00279	0.996549	1	1	0.915987	0.882429	1	0.651928	0.195449	1	1	1	1	0.999118	1	1	0.801348	1	1	1	0.999992	0.449516	0.529646	0.975004	0.987081	0.988975	0.99857	1	0.320448	0.978138	1	0.40165	1	1	1	1	1	0.970248	1	0.469098	1	1.00279	1.00279	1	0.569225	1	1	1
Cluster_Endocytosis	0.0318399	1.0043	0.513834	1	1	0.971684	0.791669	0.30779	0.657184	0.36182	1	1	0.0703552	0.289717	0.467165	0.310359	0.681554	0.0748309	1	1	1	0.847565	1	0.942048	0.369552	0.559821	0.555312	0.497809	1	1	0.285185	1	0.70388	1	1	1	1	0.590265	0.510176	1.00001	0.769087	0.314262	1.0043	1.0043	1	0.106483	0.890069	0.021441	0.880402
Cluster_FattyAcid	0.981278	1.00755	0.922096	0.356386	0.00251649	0.78068	0.828317	0.86843	0.941185	0.175499	0.420957	1	1	0.924392	0.857714	0.320681	1	0.927773	1	0.0511691	0.49021	0.999583	0.800327	0.768064	0.662423	0.219645	0.923262	0.982847	1	0.272971	0.454254	0.0511691	0.588295	0.073299	1	0.0792568	0.0322198	0.19394	0.662925	1.00003	0.520657	0.113507	1.00755	1.00755	0.555859	0.124827	0.999979	0.613345	0.473631
Cluster_FHL1	1	1.02045	0.998959	0.00158388	0.461509	0.96072	0.999703	0.292825	0.000596633	0.0658938	0.899117	0.345032	0.335574	0.812424	0.940906	0.67926	0.995319	0.530524	1	1	0.53169	1	0.986545	0.899572	0.719482	0.984513	0.908057	0.991683	0.84793	0.288568	0.45525	1	0.0761539	1	1	1	0.173608	0.984739	0.998072	1.0002	0.729888	0.687871	1.02045	1.02045	0.357496	0.951113	1	0.999626	0.731405
Cluster_FKH1	0.545191	1.00408	0.556137	1	1	0.996114	0.754837	0.857662	0.621168	0.710082	1	1	1	0.65414	0.573885	0.125378	1	0.0618104	1	1	0.305887	0.863933	0.208412	0.581877	0.726744	0.65072	0.852093	0.941326	1	0.431635	0.0142404	1	0.668926	1	1	1	1	1	0.5731	1.00001	0.982782	0.28017	1.00408	1.00408	1	0.513559	0.902508	0.599517	0.866974
Cluster_FKH2	0.688576	1.00843	0.611535	1	0.481837	0.427364	0.0514009	0.0790399	0.457821	0.921693	0.80408	0.48759	0.581282	0.254407	0.232907	0.949357	1	6.91048e-05	1	1	1	0.953259	0.527694	0.85265	0.505732	0.143338	0.0771893	0.33272	1	1	0.56521	1	0.128159	1	1	1	1	1	0.616752	1.00003	0.787699	0.016866	1.00843	1.00843	1	0.861344	0.975018	0.616802	0.91489
Cluster_Flavin	0.672495	1.00107	0.782487	1	0.0805516	0.854819	0.109284	0.400843	0.189682	1	1	0.191568	1	0.723228	0.692376	0.643078	0.24844	0.46262	1	1	1	0.701949	1	0.689611	0.360319	0.177521	0.823058	0.957164	1	1	0.761694	1	0.616568	1	1	1	1	0.199642	0.476816	1	1	1	1.00107	1.00107	1	0.465002	0.969286	0.401726	0.411399
Cluster_Flocculation	1	1.00107	0.999825	1	1	0.854819	1	1	0.590078	0.277709	1	1	1	1	0.692376	0.234524	1	1	1	1	1	0.999899	1	1	0.75767	0.802468	0.823058	0.957164	1	0.137962	0.761694	1	1	1	1	1	1	1	0.958668	1	1	1	1.00107	1.00107	1	0.828076	0.999944	1	1
Cluster_FZF1	0.98572	1.00408	0.123797	1	1	0.996114	0.0859103	1	0.841418	1	0.547237	0.0420863	0.0642161	0.65414	0.948686	0.715063	1	0.173696	1	1	1	0.963445	1	0.929799	0.995464	0.801794	0.852093	0.941326	0.317297	1	0.720549	1	0.86904	1	1	1	0.143616	0.571532	0.746255	1.00001	0.736786	0.775353	1.00408	1.00408	1	0.860645	0.690674	0.786994	0.583263
Cluster_GAL4	0.956233	1.003	0.772806	1	0.209726	0.504682	0.734817	1	0.183429	0.598208	1	1	1	0.972696	0.567338	0.944298	1	0.824606	1	1	0.000105346	0.98764	1	0.583727	0.709768	0.999925	0.391692	0.94718	1	0.340374	0.947479	1	0.451982	1	1	1	1	1	0.713007	1	0.949768	1	1.003	1.003	1	0.404934	0.992631	0.920743	0.773617
Cluster_Galactose	0.79052	1.0015	0.254217	0.224495	1	0.0899051	0.568787	1	0.71315	0.0672283	0.252895	1	1	1	0.323834	1	1	1	1	1	4.5063e-08	0.609228	1	0.162884	0.547037	0.932222	0.116525	0.5818	1	0.187698	0.987023	1	0.738768	1	1	1	1	1	0.278271	1	0.40149	1	1.0015	1.0015	1	0.0273451	0.653569	0.278209	0.150914
Cluster_GAT1	0.209119	1.00625	0.394681	0.0826403	0.386365	0.0306135	0.788985	0.310616	0.875021	0.10593	0.112401	0.709648	1	0.0994458	0.182059	0.15644	0.215687	0.973001	1	1	1	0.682254	0.37584	0.883235	0.756767	0.323197	0.202346	0.0499175	0.112105	0.051369	0.339649	1	0.394483	0.31266	1	0.0660893	1	0.726111	0.0196716	1.00002	0.316534	0.0441836	1.00625	1.00625	1	0.216584	0.483327	0.122814	0.160374
Cluster_GAT3	0.892884	1.00214	0.979958	1	1	0.881608	0.947852	0.641218	0.5038	0.478483	0.340739	0.34659	1	1	0.859269	0.872762	1	0.711426	1	1	1	0.999727	1	0.903794	0.941379	0.939653	0.839172	0.996964	1	1	0.759207	1	0.24647	1	1	1	1	1	0.931586	1	1	1	1.00214	1.00214	1	0.970509	0.999865	1	1
Cluster_GCN4	0.23864	1.00646	0.724514	0.66457	0.396645	0.721226	0.991204	1.27969e-11	0.745923	0.85877	0.347548	1	1	0.12031	0.0330126	0.00511388	0.820638	0.697714	1	1	1	0.855172	0.748462	0.780625	2.58537e-08	0.941594	0.376413	0.304726	1	1	0.0190219	1	0.25965	1	1	1	1	0.738111	0.755567	1.00002	0.710037	0.426534	1.00646	1.00646	0.50107	0.705907	0.903115	0.568158	0.356276
Cluster_GCR1	0.802516	1.003	0.772806	0.0868289	1	0.300076	0.498067	1	0.183429	0.598208	0.442083	1	0.267771	0.394945	0.567338	0.944298	0.550888	0.498989	1	1	1	0.752654	1	0.33135	0.894601	0.581213	0.391692	0.703923	0.245045	1	0.137952	1	0.451982	1	1	1	1	1	0.713007	1	0.5221	0.319855	1.003	1.003	1	0.210903	0.802085	0.76391	0.159937
Cluster_GCR2	0.821912	1.00451	0.84548	0.534148	1	0.887225	0.456801	0.884126	0.690665	0.745586	0.58355	1	1	0.886109	0.219419	0.778481	0.699302	0.224105	1	1	1	0.830615	1	0.845157	0.997433	0.171566	0.251661	0.263184	0.344244	0.464524	0.833007	1	0.903333	1	1	1	0.15751	0.608183	0.994704	1.00001	0.798076	0.821639	1.00451	1.00451	1	0.909795	0.877056	0.695332	0.153676
Cluster_GeneralTFs	0.534235	1.00733	0.934369	0.34329	0.436092	0.990156	0.363586	0.969639	0.672724	1	1	0.765588	0.531648	0.678452	0.209033	0.451494	1	0.364497	1	1	0.480264	0.998361	1	0.415662	0.878718	0.866947	0.557297	0.275157	1	1	0.965596	1	0.557981	1	1	1	1	0.781102	0.974651	1.00003	0.487463	0.994664	1.00733	1.00733	0.5454	0.916094	0.98684	0.840431	0.973107
Cluster_GLN3	0.948477	1.00625	0.754061	0.652091	1	0.234803	0.0185829	0.310616	0.0874458	1	1	0.709648	0.476195	0.0994458	0.100333	0.0746698	0.81003	0.443907	1	1	1	0.682254	0.736581	0.883235	0.272887	0.465248	0.330918	0.349461	1	1	0.629915	1	0.587766	1	1	1	1	0.362238	0.670763	1.00002	0.836281	0.222194	1.00625	1.00625	1	0.665158	0.757763	0.824806	0.332457
Cluster_Glutamate	0.672495	1.00107	0.782487	1	1	0.568025	0.771432	0.0775114	0.590078	0.277709	1	1	1	1	0.100875	0.234524	1	0.46262	1	1	1	0.959485	1	1	0.1	0.802468	0.153361	0.47043	1	0.137962	0.143589	0.00745153	0.211206	1	1	0.0116896	1	1	0.476816	1	1	1	1.00107	1.00107	1	0.465002	0.969286	0.787669	0.0821459
Cluster_Glutathione	1	1.0015	0.978031	1	1	0.579239	0.87341	0.511925	0.320691	1	0.252895	1	0.144195	0.494784	0.617273	0.384838	1	1	1	1	1	0.991015	1	1	0.0674459	0.932222	0.911551	0.83422	1	1	0.417544	1	0.351925	1	1	1	1	1	0.994052	1	1	0.658386	1.0015	1.0015	1	0.663711	0.994072	1	1
Cluster_Glycerol	0.79052	1.0015	0.639079	1	1	0.958231	0.254981	1	0.71315	1	0.252895	1	1	0.834507	0.323834	0.124865	1	1	1	1	1	0.922297	1	0.805689	0.547037	0.213464	0.654946	0.83422	0.131027	1	0.706871	1	0.351925	1	1	1	1	1	0.838996	1	1	0.658386	1.0015	1.0015	1	0.121621	0.94035	0.0865152	0.150914
Cluster_Glycogen	1	1.00171	0.844179	1	1	0.978201	0.646668	0.559501	0.384787	0.405893	1	0.28849	1	0.872042	0.71987	0.807751	1	1	1	1	1	0.999932	1	1	0.624952	0.619179	0.429499	0.917101	1	1	0.944984	1	1	1	1	1	1	1	0.757771	1	0.818769	0.707021	1.00171	1.00171	1	0.187965	0.990926	0.137532	1
Cluster_GTS1	0.939367	1.00603	0.62197	1	1	0.909386	0.271803	0.287829	0.49132	0.839019	1	0.696959	1	0.45497	0.672024	0.133883	0.465744	0.222594	1	1	1	0.701449	0.359474	0.544819	0.236386	0.256851	0.603088	0.824456	1	1	0.822812	1	0.360703	1	1	1	1	0.713564	0.983147	1.00002	0.647847	0.578072	1.00603	1.00603	0.477326	0.880656	0.920789	0.648584	0.544912
Cluster_HAL9	0.6685	1.00473	0.920036	0.550829	0.309401	0.921378	0.0337072	0.646218	0.136165	0.407658	0.600604	0.60837	0.387483	0.579272	0.15738	0.390957	0.716065	0.10492	1	1	0.064476	0.813153	1	0.497535	0.664293	0.839663	0.300836	0.379889	1	1	0.610101	1	0.335261	1	1	1	1	0.625321	0.735079	1.00001	0.823954	0.080795	1.00473	1.00473	1	0.827707	0.624873	0.990259	0.664452
Cluster_HAP2	0.413991	1.00451	0.0906991	1	1	0.461111	0.82392	0.6205	0.0431037	0.745586	0.210197	0.591282	1	0.734269	0.113041	0.181767	1	0.0892156	1	0.0309775	1	0.225599	1	0.453139	0.619908	0.788037	0.419809	0.263184	0.344244	0.464524	2.72664e-05	1	0.0587792	0.237585	1	1	1	0.608183	0.0535096	1.00001	0.0343293	0.167992	1.00451	1.00451	1	0.971135	0.278624	0.851024	0.638898
Cluster_HAP3	0.422513	1.00559	0.296527	0.611819	1	0.832665	0.686542	0.471243	0.0495208	1	0.662149	0.669903	0.110671	0.11265	0.0326892	0.0942208	1	0.360926	1	0.0382306	1	0.461177	1	0.930995	0.300563	0.693615	0.10789	0.0979805	0.407092	1	0.0847113	1	0.15348	1	1	1	1	0.686727	0.675893	1.00001	0.764643	0.736576	1.00559	1.00559	1	0.524929	0.541486	0.729592	0.261897
Cluster_HAP4	0.652574	1.00581	0.462578	1	0.365284	0.499204	0.723914	0.265297	0.949554	0.0861908	0.0953474	1	1	0.891123	0.190498	0.583067	0.0594799	0.388798	1	0.0396757	1	0.720575	0.711118	0.326237	0.688092	0.988286	0.244075	0.0787226	0.0993761	0.186039	0.000814544	1	0.177933	0.294602	1	1	1	0.330085	0.174232	1.00002	0.130214	0.336495	1.00581	1.00581	1	0.732222	0.789492	0.0782185	0.519606
Cluster_HAP5	0.939367	1.00603	0.62197	1	0.375912	0.982282	0.153797	0.943637	0.0733352	1	0.31729	1	0.464348	0.634372	0.0721622	0.617531	1	0.222594	1	1	1	0.701449	0.724142	0.363712	0.941082	0.685026	0.0871645	0.250945	0.430529	1	0.0414079	1	0.360703	1	1	1	1	0.713564	0.959194	1.00002	0.15331	0.366533	1.00603	1.00603	0.477326	0.457096	0.920789	0.999834	0.544912
Cluster_Heme	1	1.00171	0.209004	1	1	0.713194	0.335143	1	0.384787	0.405893	0.283399	1	1	0.872042	0.20139	0.45538	0.366894	1	1	1	1	0.567553	1	0.521616	1	0.619179	0.429499	0.202902	1	0.211487	0.100143	1	1	1	1	1	1	1	0.208353	1	0.818769	0.707021	1.00171	1.00171	1	0.0105858	0.615009	0.362614	1
Cluster_HIR1	1	1.00343	0.860763	0.441049	1	0.707368	0.389617	1	0.25798	0.647362	1	1	0.299711	0.506863	0.866427	0.595077	0.599499	0.863284	1	1	1	0.700548	0.159217	0.436052	0.933283	0.572984	0.889778	0.0638497	1	1	0.828861	1	0.796388	1	1	1	1	1	0.957302	1.00001	0.370238	0.914358	1.00343	1.00343	1	0.896096	0.757715	0.652334	1
Cluster_HIR2	0.965013	1.00322	0.225273	1	1	0.226924	0.160385	1	0.729607	0.623584	1	1	0.283917	0.1012	0.44433	0.300232	0.575887	0.251588	1	1	1	0.726581	0.497896	0.85209	0.755432	0.834373	0.681576	0.419519	0.260077	1	0.382363	1	0.50047	1	1	1	1	1	0.430012	0.00320651	0.144137	0.650956	1.00322	1.00322	0.293251	0.693764	0.779995	0.186408	0.796444
Cluster_Histidine	0.202941	1.00171	0.844179	1	0.125772	0.997881	0.646668	0.00450835	0.760059	1	1	1	1	0.872042	0.71987	0.45538	1	1	1	1	1	0.900949	0.0468389	0.521616	0.0257175	0.345789	0.429499	0.480077	1	1	0.55126	1	0.14949	1	1	1	1	0.299828	0.982773	1	0.818769	0.31794	1.00171	1.00171	1	0.738337	0.923491	0.916283	1
Cluster_HMS1	1	1.00343	0.860763	1	1	0.51886	0.816714	1	0.498593	0.647362	0.486782	1	1	0.506863	0.334324	0.346421	1	0.573072	1	0.0236776	1	0.908815	1	0.679267	0.933283	0.997496	0.315948	0.751423	1	1	0.47628	1	0.953647	1	1	1	1	0.510066	0.182815	1.00001	0.618635	0.914358	1.00343	1.00343	1	0.896096	0.987794	0.841148	0.816974
Cluster_HSF1	0.736809	1.00516	0.573094	0.582429	1	0.834972	0.602409	0.418096	0.186032	0.790881	0.00241144	0.075645	0.0966373	0.290448	0.930379	0.954093	0.145245	0.949586	1	1	0.369634	0.776977	0.0900001	0.219332	0.878592	0.244512	0.747509	0.871798	0.382702	0.510348	0.856427	1	0.000253552	0.266638	1	1	1	0.65739	0.290541	1.00001	0.994106	0.0143908	1.00516	1.00516	0.426427	0.26249	0.835033	0.648503	0.216643
Cluster_IME4	0.821912	1.00451	0.251917	0.170933	1	0.887225	0.0630569	1	0.250393	0.384923	0.58355	0.591282	1	0.734269	0.992834	0.986901	1	0.722224	1	1	0.332116	0.830615	0.619078	0.665947	0.619908	0.954561	0.903233	0.998478	1	1	0.921719	1	0.511517	0.237585	1	1	0.15751	0.608183	0.273459	1.00001	0.595155	0.591047	1.00451	1.00451	0.0819052	0.265298	0.877056	0.0313782	0.153676
Cluster_INO2	0.579745	1.00538	0.00743373	0.223359	1	0.332452	0.914251	0.221386	0.0997252	0.473233	0.271382	0.0834337	0.427191	0.69974	0.106783	0.509491	0.00199534	0.807594	1	0.0367838	0.38167	0.169754	1	0.131065	0.607758	0.0452204	0.0834799	0.121163	1	0.52474	0.506408	1	0.837377	1	0.0521474	1	1	0.0926607	0.0542631	1.00001	0.885193	0.133362	1.00538	1.00538	0.439594	0.309521	0.218281	0.198851	0.466827
Cluster_INO4	0.127934	1.00646	0.078068	0.290209	1	0.829469	0.677725	0.570143	0.36396	0.292065	0.00663133	0.721809	0.487783	0.704399	0.0705373	0.495802	0.502388	0.697714	1	0.0439996	1	0.663041	0.748462	0.277625	0.959747	0.157737	0.0322457	0.453842	1	0.590639	0.406082	0.0439996	0.619681	0.321517	0.0622783	1	1	0.738111	0.468831	1.00002	0.105247	0.0530454	1.00646	1.00646	0.149001	0.553096	0.741613	0.259843	1
Cluster_InvasiveGrowth	0.120648	1.00214	0.141251	0.304636	1	0.70895	0.236924	1	0.5038	1	1	1	0.199501	0.923517	0.0685453	0.0975019	1	0.711426	1	1	1	0.492539	1	0.649691	0.216379	0.603312	0.137688	0.310346	0.18184	1	0.913453	1	0.24647	1	1	1	1	1	0.318061	1	0.298397	0.784528	1.00214	1.00214	1	0.0447844	0.544557	0.523105	0.0709098
Cluster_Isoleucine	0.79052	1.0015	0.639079	1	1	0.579239	0.254981	0.000152139	1	0.365906	1	1	1	0.494784	0.863022	0.384838	0.05354	1	1	1	0.125711	0.922297	1	0.805689	0.0120842	0.932222	1	0.957579	1	1	0.706871	1	1	1	1	0.000104593	1	1	0.0635133	1	0.775596	0.658386	1.0015	1.0015	0.149415	0.663711	0.653569	0.885822	1
Cluster_IXR1	0.401866	1.00343	0.999416	1	0.235902	0.939452	0.614908	0.806248	0.25798	1	0.486782	0.494055	1	0.286774	0.721013	0.595077	1	0.863284	1	1	1	0.996641	0.520474	0.976453	0.795113	0.753103	0.524274	0.95462	1	1	0.994987	1	0.796388	1	1	1	1	1	0.88812	1.00001	0.618635	0.686436	1.00343	1.00343	0.0503539	0.972417	0.999808	0.952333	0.816974
Cluster_LEU3	0.763671	1.00408	0.761852	0.498918	0.0389703	0.27503	0.0325931	0.00741048	0.841418	0.3384	0.547237	1	0.345052	0.246585	0.744302	0.483136	1	0.668643	1	1	0.00515275	0.623768	1	0.581877	0.16567	0.65072	0.852093	0.561159	1	1	0.853631	1	0.668926	1	1	0.000838681	1	1	0.5731	1.00001	0.294527	0.28017	1.00408	1.00408	0.355851	0.322532	0.902508	0.786994	0.866974
Cluster_Leucine	1	1.00107	0.957941	1	0.0805516	0.236162	0.771432	0.00788715	1	0.277709	1	1	1	0.317628	0.932919	1	1	0.46262	1	1	0.0914807	0.959485	1	0.280256	0.1	0.802468	0.823058	0.47043	1	1	0.761694	1	1	1	1	1	1	1	0.801997	1	0.655998	1	1.00107	1.00107	1	0.828076	0.969286	1	1
Cluster_Lysine	0.86604	1.00193	0.795648	1	1	0.589006	1	0.0492941	0.799305	0.443366	1	1	1	0.333569	0.799572	0.225701	0.402089	0.673197	1	1	1	0.878209	1	0.284494	0.159495	0.730289	0.517486	0.862698	1	0.234585	0.867179	1	0.483083	1	1	1	4.00012e-05	1	0.867425	1	0.853644	1	1.00193	1.00193	0.187885	0.528421	0.905353	0.737571	1
Cluster_MAC1	0.763671	1.00408	0.761852	0.498918	1	0.445906	0.0859103	0.857662	0.0755667	0.710082	1	0.554848	1	0.992476	0.984146	0.980187	0.662762	0.385692	1	0.0280632	0.305887	0.963445	1	0.187996	0.319782	0.65072	0.852093	0.941326	0.317297	1	0.548852	1	0.226251	0.21759	1	1	1	0.00105085	0.746255	1.00001	0.510187	0.520099	1.00408	1.00408	1	0.707561	0.902508	0.599517	0.583263
Cluster_MAL13	0.977753	1.00733	0.86501	0.34329	0.436092	0.82767	0.900145	0.656785	0.672724	0.362637	0.159434	0.765588	1	0.224532	0.719654	0.627132	0.291604	0.09361	1	1	1	0.992982	1	0.94487	0.109591	0.271021	0.908059	0.692465	0.0290693	0.262013	0.167851	1	0.0591285	1	1	1	0.242614	0.781102	0.572226	1.00003	0.971517	0.96435	1.00733	1.00733	0.18152	0.963966	0.98684	0.0930009	0.252613
Cluster_MAL33	0.499695	1.00603	0.62197	1	1	0.957151	0.952023	0.772376	0.693587	0.839019	0.31729	0.696959	1	0.968993	0.890895	0.793097	0.798796	0.855432	1	1	0.416433	0.961426	0.724142	0.865343	0.556721	0.893333	0.754804	0.981498	1	1	0.905529	1	0.100017	1	1	1	1	0.346225	0.718415	1.00002	0.926666	0.782018	1.00603	1.00603	1	0.457096	0.995042	0.0990346	0.544912
Cluster_Maltose	1	1.00085	0.999011	1	1	0.953873	1	1	1	1	1	1	1	0.642108	1	1	1	1	1	1	1	0.999979	1	0.60774	1	1	1	1	1	1	1	1	1	1	1	1	1	1	0.988833	1	1	1	1.00085	1.00085	1	0.755461	0.999988	1	0.345548
Cluster_ManualAFT1targets	0.977645	1.00365	0.999828	0.00257605	1	0.997388	1	0.82517	1	0.669642	1	0.515185	1	1	0.998664	0.853059	0.242659	0.60701	1	1	0.278639	1	1	0.720513	0.947152	0.971672	1	0.999962	0.289256	0.396741	0.996979	1	1	1	1	1	1	0.531472	0.993574	1.00001	1	0.926574	1.00365	1.00365	1	0.918785	1	1	0.835437
Cluster_ManualG1genes	0.203643	1.01506	0.993269	0.230764	0.319589	0.980705	0.927079	0.513577	0.992387	0.640341	0.539058	0.789539	0.450986	0.816343	0.854701	0.958917	0.903349	0.565041	1	0.0987105	0.736363	1	1	0.803813	0.658924	0.907116	0.460207	0.987305	0.751847	0.872933	0.940665	1	0.873224	0.591776	1	1	1	1	0.511525	1.00011	4.50462e-17	0.526554	1.01506	1.01506	0.799306	0.947194	1	0.99814	0.081336
Cluster_ManualHAP1targets	0.314056	1.01106	0.894514	0.548148	0.052269	0.861792	0.874859	0.965619	0.976428	0.0988092	0.345215	0.63379	1	0.494553	0.472117	0.228482	0.00641533	0.557435	1	1	1	0.99949	1	0.863282	0.913174	0.942908	0.543907	0.594658	0.26881	0.0158773	0.203622	1	0.39655	1	1	1	1	0.658573	0.0594993	1.00006	0.667824	0.441241	1.01106	1.01106	0.109906	0.44678	0.99986	0.377079	0.592812
Cluster_ManualMethionine	0.981499	1.00581	0.90888	0.250049	1	0.778831	0.555737	0.115575	0.271363	0.828135	1.48624e-19	0.310685	0.452235	0.413696	0.459486	0.768016	0.446836	0.840839	1	1	0.405066	0.891594	1	0.691988	0.00208224	0.46645	0.38945	0.987756	1	1	0.216508	1	0.519845	1	1	1	1	0.0279038	0.0839138	1.00002	0.613781	0.984274	1.00581	1.00581	8.81652e-08	0.856779	0.981051	0.986882	1
Cluster_ManualM-G1genes	0.931523	1.00257	0.989224	0.353434	1	0.707142	0.626421	1	1	1	0.393513	0.399967	0.234389	0.954297	0.998483	0.915805	1	1	1	1	1	0.999996	1	0.748921	0.835827	0.790611	0.984398	0.98303	1	1	0.883274	1	0.350076	1	1	1	1	0.41426	0.941506	1	0.702426	0.525606	1.00257	1.00257	1	0.911487	0.999973	0.975822	0.343505
Cluster_ManualYap1Targets	0.998137	1.01573	1	0.734025	0.117385	0.999998	0.987887	0.930369	0.000275688	0.0810368	0.79952	0.582546	0.800706	0.58091	0.990366	0.998746	0.370155	0.993071	1	1	0.156093	1	1	0.977241	0.222745	0.983441	0.885296	0.999993	0.766549	0.158471	0.872449	1	0.902414	0.607492	1	1	0.44616	1	0.998548	1.00012	0.908664	0.448556	1.01573	1.01573	0.0812801	0.205662	1	0.838557	0.595998
Cluster_ManualZAP1targets	0.438069	1.00886	0.996871	0.775676	0.148334	0.783697	0.859064	0.097932	0.920952	0.931323	0.232979	0.514353	1	0.928415	0.447199	0.349694	0.074328	0.343831	1	1	1	0.99968	0.848702	0.999221	0.432845	0.875554	0.422451	0.844392	1	1	0.778599	1	0.94397	1	1	1	1	0.263785	0.995996	1.00004	0.917547	0.712304	1.00886	1.00886	1	0.818879	0.999906	0.802847	0.225643
Cluster_ManualZAP1targets-2	0.54399	1.01864	0.962273	0.359543	0.415848	0.677673	0.706182	0.200695	0.754257	0.792754	0.264865	0.875877	0.851463	0.464775	0.249645	0.0189108	0.190927	0.406474	1	0.120367	1	0.971352	0.900926	0.999576	0.539629	0.69396	0.529449	0.856704	0.506881	0.921597	0.479655	1	0.9723	0.668994	1	1	0.15067	0.723763	0.870805	1.00017	0.780899	0.558497	1.01864	1.01864	0.862185	0.152552	0.999626	0.409068	0.141762
Cluster_MATa1	0.821912	1.00451	0.993559	0.534148	1	0.295818	0.82392	0.884126	0.690665	1	1	1	1	0.995509	0.992834	1	1	0.926698	1	1	1	0.997815	0.242004	0.453139	0.12186	0.984193	0.903233	0.94998	1	1	0.999959	1	0.903333	1	1	1	1	1	0.953272	1.00001	0.798076	1	1.00451	1.00451	1	0.994002	0.993624	0.695332	1
Cluster_Mating	0.916532	1.00559	0.970279	0.611819	1	0.832665	0.686542	0.930742	0.941537	0.816517	0.662149	1	1	0.372206	0.253568	0.546993	0.774307	0.824924	1	1	1	0.998624	0.697483	0.657548	0.914829	0.90291	0.10789	0.890634	0.0931773	1	0.723407	1	0.993242	1	1	1	1	0.0245837	0.952026	1.00001	0.764643	0.0653187	1.00559	1.00559	1	0.524929	0.999431	0.99969	0.936871
Cluster_MBP1	0.75462	1.00777	0.824168	0.73063	0.45485	0.728729	0.736332	0.470108	0.948372	0.39762	0.0570421	0.784834	0.552165	0.589373	0.566625	0.516324	0.602148	0.0516692	1	1	1	0.904607	0.809345	0.64807	0.258917	0.0540544	0.7692	0.728614	0.515456	0.657845	0.762354	1	0.0829314	1	1	1	1	0.0693546	0.339291	1.00003	1.22345e-06	0.1288	1.00777	1.00777	1	0.784969	0.84062	0.230704	0.292697
Cluster_MCM1	0.928786	1.00581	0.462578	1	1	0.649251	0.126383	0.496986	0.841324	0.239793	1	0.683719	1	0.595929	0.312132	0.388272	0.786902	0.965337	1	1	1	0.991583	1	0.691988	0.833087	0.753934	0.716875	0.752411	0.418928	1	0.494508	1	0.519845	1	1	1	1	1	0.86765	1.00002	0.613781	4.0202e-06	1.00581	1.00581	1	0.856779	0.995906	0.606325	0.770939
Cluster_MET31	0.88223	1.00365	0.829991	0.461041	1	0.619998	0.251461	0.00399943	0.130356	0.0872441	2.30652e-06	0.515185	1	0.167194	0.118508	0.196011	0.242659	0.879301	1	1	1	0.299739	0.542042	0.123563	0.00274341	0.290822	0.0920941	0.689737	1	0.396741	0.0988111	1	0.343243	0.19708	1	1	0.1295	1	0.699905	1.00001	0.41796	0.214227	1.00365	1.00365	0.00623804	0.391301	0.735345	0.702681	0.835437
Cluster_MET4	0.794508	1.0043	0.725347	0.516852	1	0.841572	0.607509	0.0387038	0.217901	0.0334784	2.93879e-08	0.201379	0.359509	0.289717	0.467165	0.52633	0.681554	0.69641	1	1	1	0.847565	1	0.819555	0.00346259	0.559821	0.555312	0.497809	1	0.448323	0.155158	1	0.12027	1	0.0419181	1	1	0.215609	0.0693595	1.00001	0.33594	0.556423	1.0043	1.0043	0.000939859	0.571145	0.890069	0.6495	0.880402
Cluster_MIG1	0.219466	1.00538	0.535388	0.223359	1	0.0481388	0.804524	0.92323	0.80004	0.473233	1	0.655486	1	0.986621	0.643644	0.710828	0.407938	0.955503	1	1	0.38167	0.758398	0.683206	0.918471	0.607758	0.991065	0.629786	0.714184	0.395019	1	0.794748	1	0.130712	1	1	1	1	0.672385	0.725974	1.00001	0.966789	0.484253	1.00538	1.00538	0.110414	0.797296	0.561756	0.514543	1
Cluster_Mitochondria	0.0512193	1.00974	0.999993	0.806253	1	0.999353	0.919884	0.650614	0.984773	0.785857	0.847724	0.565053	1	0.999089	0.904421	0.758596	1	0.616863	1	1	0.579873	0.997144	0.874275	0.930774	0.951462	0.862372	0.942555	0.99654	0.596092	0.73866	0.971975	1	0.966723	1	1	1	1	1	0.967097	1.00005	0.995552	0.787076	1.00974	1.00974	0.648181	0.899599	0.995813	0.997086	0.949523
Cluster_MitochondrialRPs	0.0586193	1.01172	0.232346	1	0.598207	0.552001	0.760543	0.908205	0.675519	0.970773	0.653547	1	0.701014	0.453202	0.711816	0.898917	0.955007	0.772372	1	1	0.64713	0.97137	0.221928	0.716131	0.813691	0.713972	0.299698	0.91551	1	1	0.889793	1	0.990369	1	1	0.119848	1	0.42005	0.923242	1.00007	0.995904	0.899763	1.01172	1.01172	0.714865	0.55423	0.904218	0.812822	0.91962
Cluster_MOT3	0.945253	1.00279	0.982945	1	0.196308	0.915987	0.21981	1	0.358899	0.571128	1	1	0.251264	0.337167	0.269921	0.727273	1	0.0556429	1	1	1	0.990679	0.449516	0.529646	0.975004	0.997984	0.0548532	0.567052	1	0.320448	0.921071	1	0.40165	1	1	1	1	1	0.77854	1	0.22858	0.864135	1.00279	1.00279	1	0.569225	0.999405	0.982279	0.748236
Cluster_mRNAprocessing	0.357223	1.02663	1	0.625955	1	0.94977	0.745561	0.993339	0.692895	0.984112	0.728842	0.564514	0.932962	0.897438	0.977368	0.98614	0.967	0.9768	1	1	0.902857	0.999996	0.631244	0.712314	0.999738	0.983878	0.766903	0.994263	0.214478	0.972897	0.930448	0.16619	0.910734	1	1	1	1	0.424759	1	1.00034	0.998187	0.992539	1.02663	1.02663	0.766124	0.997056	0.999808	0.999996	0.96496
Cluster_MSS11	0.545191	1.00408	0.318038	0.1456	1	0.626469	0.754837	0.0314617	0.841418	0.710082	0.547237	1	1	0.43717	0.573885	0.715063	0.662762	0.668643	1	1	1	0.963445	1	0.790434	0.16567	0.298463	0.694139	0.561159	1	0.431635	0.368513	1	0.429001	1	1	1	1	0.571532	0.944892	1.00001	0.140803	0.520099	1.00408	1.00408	0.355851	0.172976	0.902508	0.786994	0.866974
Cluster_MTH1	0.132497	1.00386	0.144243	0.480323	1	0.932573	0.876046	0.534837	0.818234	0.314727	0.0346479	0.535438	0.330271	0.387016	0.681517	0.874886	1	0.893444	1	1	0.292393	0.879646	1	0.757504	0.271115	0.105437	0.437994	0.79038	1	0.0957573	0.910587	1	0.631043	1	1	1	1	0.00659995	0.114302	1.00001	0.886954	0.246715	1.00386	1.00386	1	0.0554906	0.712972	0.00214259	0.099307
Cluster_NDD1	0.97609	1.00886	0.702763	0.432678	0.499091	0.863923	0.039445	0.776644	0.822907	0.112517	0.503136	0.826346	1	0.315119	0.447199	0.663109	0.904752	0.097851	1	1	0.546051	0.980526	0.554976	0.781424	0.828875	0.875554	0.422451	0.511787	0.562039	0.338312	0.131882	1	0.27821	1	1	1	1	0.840118	0.854888	1.00004	0.827164	0.00327193	1.00886	1.00886	0.613787	0.710516	0.990896	0.178822	0.795769
Cluster_NRG1	0.995347	1.00516	0.998638	1	1	0.995868	0.134359	0.693487	0.776219	0.790881	0.256029	0.263743	1	0.290448	0.851991	0.954093	0.746849	0.5434	1	1	1	0.999985	0.66826	0.903905	0.957541	0.995918	0.747509	0.991177	1	1	0.997542	1	0.623683	1	1	1	0.177939	0.0841232	0.997594	1.00001	0.501122	0.875113	1.00516	1.00516	1	0.761103	0.999996	0.648503	0.43949
Cluster_NuclearProteinTargetting	0.00600372	1.01084	0.734866	0.537355	0.569974	0.317095	0.525223	0.35903	0.293042	1	0.876601	0.882003	1	0.598966	0.650323	0.738084	0.141868	0.851801	1	1	1	0.981302	0.0231207	0.14171	0.900861	0.294493	0.743303	0.890035	1	1	0.246951	1	0.951913	1	1	1	1	0.171611	0.968444	1.00006	0.643125	0.939113	1.01084	1.01084	0.317116	0.533183	0.997784	0.816572	0.388737
Cluster_PDR1	0.945253	1.00279	0.813091	1	1	0.794061	0.684085	1	0.901807	1	0.418302	1	1	0.592308	0.955286	0.931516	1	0.458978	1	1	1	0.945896	0.449516	0.529646	0.868196	0.476508	0.929469	0.992151	1	1	0.978138	1	0.40165	1	1	1	1	1	0.998688	1	0.744849	0.570568	1.00279	1.00279	1	0.933469	0.962764	0.0338176	1
Cluster_PentosePhosphate	1	1.00193	0.795648	1	1	0.812545	0.414739	0.602449	0.799305	0.106108	1	1	1	0.90107	0.799572	0.843595	1	0.673197	1	1	0.158665	0.980537	0.338402	0.589365	0.390191	0.730289	0.790841	0.960624	1	0.234585	0.867179	1	0.483083	1	1	1	1	1	0.670047	1	0.241023	0.748741	1.00193	1.00193	0.0167542	0.798313	0.986975	0.445197	0.226926
Cluster_Peroxisome	0.988587	1.0043	0.983837	1	1	0.710172	0.978671	0.30779	0.861889	0.728411	1	0.573452	1	0.696094	0.297344	0.52633	1	0.418741	1	1	1	0.847565	1	0.990797	0.572204	0.725091	0.363759	0.312855	1	1	0.892149	1	0.70388	1	1	1	0.15059	0.590265	0.830699	1.00001	1	0.953736	1.0043	1.0043	0.370623	0.887548	0.890069	0.932487	0.611841
Cluster_PHD1	0.940149	1.00755	0.726281	0.720596	0.00251649	0.963637	0.159458	0.250563	0.846626	1	0.768279	0.431434	1	0.554156	0.644789	0.484197	0.865454	0.98725	1	1	0.49021	0.97082	0.469862	0.297705	0.22708	0.719755	0.599535	0.366412	1	1	0.454254	1	0.142536	1	1	1	1	0.790703	0.25129	1.00003	0.354689	0.113507	1.00755	1.00755	0.555859	0.753614	0.98488	0.199207	0.272497
Cluster_PHO4	0.802516	1.003	0.26007	1	1	0.504682	0.734817	1	0.69279	0.598208	0.442083	1	0.267771	0.86038	0.0755445	0.0315767	0.550888	0.824606	1	1	1	0.752654	1	0.0523831	1	0.371804	0.622268	0.0295746	0.245045	0.340374	0.490758	1	0.451982	1	1	1	1	0.46429	0.865918	1	0.949768	0.126023	1.003	1.003	0.276682	0.404934	0.802085	0.0524303	0.41828
Cluster_Phospholipid	0.0739491	1.00755	0.84525	1	1	0.926925	0.555928	0.972615	0.51863	0.380181	0.768279	0.775416	0.0406231	0.148586	0.763891	0.189924	0.586617	0.388857	0.0222497	1	1	0.568254	0.800327	0.768064	0.796862	0.219645	0.847245	0.768106	1	0.272971	0.71423	1	0.755504	0.364148	4.4236e-05	1	0.248802	0.45466	0.524905	1.00003	0.354689	0.569076	1.00755	1.00755	1	0.0319823	0.851918	0.999742	0.97583
Cluster_Polyamine	0.262676	1.00107	0.957941	1	1	0.854819	1	1	0.590078	0.277709	1	1	0.0045843	0.723228	0.692376	1	1	0.46262	1	1	1	0.997153	1	0.689611	0.75767	0.484988	0.456612	0.797346	1	0.137962	0.761694	1	0.616568	1	1	1	1	0.199642	0.801997	1	1	0.0228818	1.00107	1.00107	1	0.465002	0.998149	0.787669	0.411399
Cluster_primig-EarlySpo	0.981954	1.01239	0.999549	0.875269	1	0.998502	0.944111	0.926214	0.922138	0.706203	0.412495	0.211841	1	0.862652	0.99921	0.988196	0.833845	0.346132	1	1	0.295098	1	0.92793	0.968253	0.436591	0.994897	0.985919	0.999772	1	0.817684	0.96732	1	0.890871	0.00579022	1	1	1	0.717657	0.993515	1.00007	0.793304	0.28614	1.01239	1.01239	0.140397	0.973428	1	0.993011	0.839204
Cluster_primig-LateSpo	0.957228	1.04123	1	0.637358	1	0.99999	0.919323	0.408798	0.974447	0.991629	0.944736	0.777913	0.915165	0.746308	0.946205	0.989225	0.561108	0.91647	1	1	0.867301	1	0.990168	0.999951	0.828216	0.999998	0.673657	0.995941	0.88304	0.995955	0.999531	1	0.999431	0.684077	1	0.353588	1	0.997525	0.999999	1.00079	0.52815	0.689936	1.04123	1.04123	0.925542	0.982499	1	0.99873	0.829704
Cluster_primig-MidSpo	0.872438	1.00908	0.995914	0.444938	0.507504	0.985619	0.939555	0.925935	0.838974	0.752457	0.516094	0.0289123	0.608524	0.992432	0.735958	0.82058	0.910084	0.553216	1	1	0.189363	0.999986	1	0.985053	0.966604	0.836639	0.723863	0.598439	0.202447	0.714085	0.16823	1	0.303847	1.25443e-05	1	1	1	0.847142	0.732154	1.00004	0.417446	0.732568	1.00908	1.00908	0.622686	0.355005	0.999883	0.445936	0.809161
Cluster_Proline	0.590531	1.00085	0.98063	1	1	0.740101	1	0.336177	0.509999	1	1	1	1	0.642108	0.55449	0.561367	1	1	1	1	1	0.974552	1	0.60774	0.6782	0.675476	0.749769	0.601196	1	1	0.916385	1	0.535495	1	1	1	1	1	0.606888	1	0.574115	0.458571	1.00085	1.00085	1	1	0.999226	1	0.345548
Cluster_Proteasome	0.0739277	1.00668	0.694127	1	1	0.250494	0.555726	0.593024	0.972301	0.309696	0.130519	0.733462	1	0.863365	0.896828	0.986563	0.08996	0.892176	1	1	1	0.842088	0.408036	0.970946	0.51065	0.464085	0.579086	0.976858	0.125231	0.602687	0.744131	1	0.926228	1	1	1	1	0.393802	0.571958	1.00002	0.87313	0.947619	1.00668	1.00668	1	0.442199	0.725324	0.448313	0.833692
Cluster_Purine	0.499494	1.00494	0.78775	0.566915	1	0.779611	0.737316	2.46534e-05	0.531689	0.429979	0.012894	1	1	0.251187	0.987566	0.945536	0.731897	0.942885	1	1	1	0.9325	0.275813	0.342911	0.000235075	0.632688	0.981475	0.902787	0.370137	0.144307	0.906407	1	0.79175	1	1	1	1	1	0.817399	1.00001	0.670687	0.654853	1.00494	1.00494	1	0.72035	0.990428	0.774084	0.913099
Cluster_PUT3	0.23864	1.00646	0.851143	0.66457	0.396645	0.188647	0.677725	0.570143	0.103022	0.85877	0.347548	0.356998	0.487783	0.535256	0.354765	0.495802	0.820638	0.881015	1	1	0.110274	0.985793	0.392033	0.277625	0.46917	0.262064	0.376413	0.453842	1	0.590639	0.406082	0.0439996	0.25965	0.0557927	1	0.0682957	0.217362	0.738111	0.621666	1.00002	0.35056	0.82079	1.00646	1.00646	0.50107	0.395421	0.971016	0.0767784	0.958788
Cluster_Pyrimidine	0.886105	1.00516	0.881656	0.582429	1	0.400692	0.41704	0.914905	0.353182	0.189422	1	0.640444	1	0.826982	0.732431	0.851398	0.746849	0.5434	1	1	1	0.999879	0.292705	0.384104	0.878592	0.549541	0.403799	0.939409	0.382702	0.510348	0.280772	1	0.410368	1	1	1	0.177939	0.65739	0.77345	1.00001	0.501122	0.683955	1.00516	1.00516	1	0.421111	0.997839	0.29534	0.43949
Cluster_RAP1	0.994176	1.00494	0.987194	0.566915	0.320953	0.779611	0.990084	0.905679	0.00736525	0.17329	0.616964	0.624748	0.401013	0.622214	0.996844	0.945536	0.731897	0.277687	1	1	1	0.99999	1	0.887026	0.947672	0.632688	0.981475	0.998559	1	0.144307	0.519295	1	0.79175	0.257077	1	1	1	0.264703	0.817399	1.00001	0.952513	0.220541	1.00494	1.00494	1	0.72035	0.999997	0.602847	0.68853
Cluster_RCS1	0.931234	1.0043	0.283486	0.516852	1	0.105384	0.0461795	0.871573	0.657184	1	0.565771	0.573452	0.359509	0.145941	0.0768495	0.52633	1	0.418741	1	1	0.319126	0.598901	0.601122	0.407737	0.903867	0.383701	0.0990004	0.161804	1	1	0.0715367	1	0.12027	1	1	1	1	0.590265	0.510176	1.00001	0.91968	0.953736	1.0043	1.0043	0.0751923	0.217304	0.668519	0.0588559	0.880402
Cluster_REB1	0.572949	1.00646	0.078068	0.66457	0.396645	0.0511229	0.352046	0.570143	0.96778	0.572165	0.714252	0.356998	0.140154	0.933405	0.134386	0.180657	0.820638	1	1	1	1	0.118924	0.748462	0.277625	0.46917	0.795828	0.376413	0.453842	0.453049	0.590639	0.00233829	1	0.428192	1	1	1	1	0.378103	0.190088	1.00002	0.855704	0.246955	1.00646	1.00646	0.50107	0.553096	0.160835	0.568158	0.593109
Cluster_RFX1	0.545191	1.00408	0.318038	1	1	0.27503	0.189767	0.857662	0.377242	0.710082	1	1	0.00774134	0.839169	0.390745	0.270873	0.0185474	0.668643	1	1	1	0.963445	0.582324	0.361856	0.883094	0.471761	0.694139	0.368341	1	1	0.853631	1	0.226251	0.21759	0.0398604	1	0.143616	1	0.5731	1.00001	0.140803	0.520099	1.00408	1.00408	1	0.707561	0.690674	0.786994	0.583263
Cluster_RGM1	0.977645	1.00365	0.994872	1	1	0.961524	0.848899	0.503481	0.297249	0.290871	1	0.155963	1	0.559251	0.965991	1	1	0.60701	1	1	1	0.999994	1	0.897615	0.635744	0.919138	0.779649	0.998406	0.289256	0.396741	0.951608	1	0.343243	1	1	1	1	1	0.993574	1.00001	1	0.926574	1.00365	1.00365	1	0.918785	0.999998	0.87082	0.835437
Cluster_RGT1	0.534235	1.00733	0.600173	0.34329	0.109139	0.129675	0.803593	0.656785	0.93308	0.891319	0.758355	0.765588	0.531648	0.358837	0.321071	0.290793	0.857487	0.985551	1	1	1	0.58691	0.790885	0.742064	0.627136	0.66316	0.27333	0.275157	1	1	0.167851	1	0.230634	1	1	1	0.0305327	0.781102	0.895146	1.00003	0.914917	0.541912	1.00733	1.00733	0.5454	0.291307	0.675984	0.720945	0.450644
Cluster_RIM101	0.840612	1.00603	0.782541	0.639151	1	0.288243	0.153797	0.772376	0.49132	1	1	1	1	0.634372	0.373598	0.424529	1	0.855432	1	1	1	0.701449	0.359474	0.544819	0.941082	0.541128	0.0871645	0.250945	1	1	0.706275	1	0.745331	0.303688	1	1	1	1	0.998046	1.00002	0.926666	0.986523	1.00603	1.00603	1	0.880656	0.978009	0.902528	0.308722
Cluster_RLM1	0.965013	1.00322	0.998104	1	0.222923	0.991603	0.778875	0.785281	1	1	1	0.472008	1	0.694708	0.98026	0.798718	1	0.845145	1	1	1	0.999714	1	0.633665	0.916012	0.834373	0.994497	0.992509	1	1	0.897811	1	0.765172	1	1	1	1	1	0.99307	1	0.144137	0.0503641	1.00322	1.00322	1	0.962877	0.99999	0.805745	0.796444
Cluster_RME1	0.859714	1.00343	0.996792	1	1	0.939452	0.614908	1	0.942582	0.647362	1	0.494055	1	0.738057	0.721013	0.161663	1	0.573072	1	1	1	0.999997	0.520474	0.227747	0.989348	0.883135	0.970263	0.95462	0.274812	1	0.828861	1	0.953647	1	1	1	1	0.510066	0.957302	1.00001	0.842216	0.686436	1.00343	1.00343	1	0.896096	0.999999	0.841148	0.212807
Cluster_RNAPol	0.0501995	1.0115	0.961591	0.855528	0.591325	0.493467	0.49503	0.901369	0.506353	1	1	0.654746	0.694214	0.937273	0.94396	0.796296	0.339025	0.956314	1	1	0.640217	0.974134	0.694874	0.122318	0.79308	0.761401	0.940064	0.979531	1	1	0.917488	1	0.312787	1	1	1	1	1	0.999759	1.00006	0.995178	0.643804	1.0115	1.0115	1	0.947202	0.988544	0.791006	0.794606
Cluster_ROX1	0.956233	1.003	0.994144	0.398826	1	0.300076	0.121267	0.762052	0.406755	1	1	1	1	0.192722	0.183588	0.254844	0.550888	0.218909	1	1	1	0.98764	1	0.33135	0.709768	0.900379	0.391692	0.273456	1	1	0.490758	1	0.451982	1	1	1	1	0.46429	0.865918	1	0.781974	0.126023	1.003	1.003	1	0.950207	0.992631	0.920743	0.41828
Cluster_RPH1	0.952402	1.00473	0.990784	0.550829	0.309401	0.384453	0.321991	0.646218	0.494588	0.761678	0.225406	1	0.387483	0.996531	0.440456	0.606966	0.716065	0.482853	1	1	0.344861	0.997166	0.636229	0.497535	0.468997	0.839663	0.165604	0.849382	1	1	0.283075	1	0.550685	0.247393	1	0.050511	1	0.625321	0.933279	1.00001	0.112158	0.841415	1.00473	1.00473	1	0.827707	0.962814	0.957065	0.903335
Cluster_RPs	1	1.03034	1	0.210399	0.396017	0.999821	1	0.684942	0.0468603	0.632031	0.977754	0.337251	0.580277	0.98679	0.99994	0.964192	0.996513	0.93366	1	1	0.480962	1	0.998219	0.992561	0.99434	0.999996	0.997729	1	0.937169	0.983369	0.965105	0.186446	0.688093	1	1	1	0.0233625	0.997857	1	1.00043	0.993242	0.961546	1.03034	1.03034	0.82377	0.996835	1	1	0.970714
Cluster_rRNAprocessing	0.0880916	1.00777	0.999339	1	1	0.827162	0.186614	0.975301	0.120279	0.904669	0.435149	0.784834	1	0.976734	0.803095	0.994561	0.602148	0.934757	1	1	0.499967	0.966921	1.36401e-10	4.35145e-11	0.393699	0.858884	0.494972	0.949355	1	1	0.853843	1	0.963463	1	1	1	1	0.799885	0.998781	1.00003	0.999552	0.773694	1.00777	1.00777	1	0.999612	0.942296	0.998649	0.978278
Cluster_RTG1	0.344305	1.00821	0.877329	0.749637	0.472991	0.08845	0.373566	0.896861	0.604185	1	0.200619	1	0.571791	0.352622	0.00228944	0.412708	0.631883	0.147477	1	1	1	0.256161	0.826182	0.706549	0.755538	0.278433	0.000206941	0.000301542	1	1	0.16839	1	0.205756	1	1	1	1	1	0.774005	1.00003	0.880578	0.0803925	1.00821	1.00821	0.585825	0.599886	0.610282	0.718441	0.0809306
Cluster_RTG3	0.729174	1.00386	0.79688	0.480323	1	0.531436	0.876046	1	0.818234	1	1	1	0.330271	0.608462	0.496774	0.678443	0.263695	0.893444	1	1	1	0.879646	0.562644	0.757504	0.858407	0.380551	0.254704	0.429231	1	1	0.804601	0.0266032	0.0780266	1	1	1	1	1	0.440764	1.00001	0.464785	1	1.00386	1.00386	1	0.656508	0.996895	0.895479	0.553164
Cluster_RTS2	0.931523	1.00257	0.850755	1	0.0162114	0.707142	0.626421	1	0.882586	1	1	1	0.0273676	0.533429	0.809922	0.915805	1	0.417167	1	1	0.020812	0.999235	1	0.748921	1	0.919219	0.484753	0.832115	1	1	0.883274	1	0.64579	1	1	1	1	0.41426	0.654502	1	0.413594	0.841553	1.00257	1.00257	1	0.0362109	0.999615	1	1
Cluster_SFL1	0.931234	1.0043	0.725347	0.516852	1	0.213946	0.112398	0.871573	0.417078	0.728411	0.565771	1	1	0.289717	0.297344	0.52633	0.681554	0.418741	1	1	1	0.598901	1	0.942048	0.369552	0.228723	0.205341	0.161804	1	1	0.451841	1	0.12027	1	0.0419181	1	1	0.215609	0.323761	1.00001	0.769087	0.953736	1.0043	1.0043	0.370623	0.753034	0.668519	0.268062	0.611841
Cluster_SFP1	0.794508	1.0043	0.871366	0.0324716	1	0.841572	0.231427	0.871573	0.0936924	0.36182	1	1	1	0.864418	0.645032	0.748368	0.305721	0.916961	1	1	0.319126	0.847565	0.601122	0.407737	0.572204	0.852929	0.205341	0.678808	1	1	0.451841	1	0.470857	1	1	1	0.15059	0.215609	0.830699	1.00001	0.769087	0.143803	1.0043	1.0043	0.370623	0.753034	0.890069	0.6495	0.326062
Cluster_SIG1	0.154928	1.00581	0.462578	0.625733	0.365284	0.218322	0.85732	0.937521	0.991998	1	1	0.683719	1	0.765501	0.103559	0.0493561	0.446836	0.965337	1	1	0.0139443	0.440426	0.711118	0.50601	0.833087	0.618216	0.55597	0.0305752	1	1	0.939812	1	0.874109	1	1	1	1	0.700444	0.624188	1.00002	0.130214	0.336495	1.00581	1.00581	0.125514	0.259269	0.789492	0.606325	0.943253
Cluster_SIP4	0.778565	1.00799	0.948801	1	1	0.865909	0.336826	0.888087	0.876259	0.910719	1	0.793859	0.00833723	0.466791	0.358596	0.711312	0.338106	0.823786	1	1	0.50954	0.531626	0.817957	0.678144	0.969199	0.712605	0.267063	0.687078	1	0.667928	0.804684	1	0.968377	1	1	1	1	0.808666	0.986761	1.00003	0.982599	0.975881	1.00799	1.00799	0.576066	0.558959	0.829017	0.808655	0.734216
Cluster_SKN7	0.955614	1.00799	0.893566	0.382286	1	0.982267	0.125911	0.289221	0.876259	0.0263318	0.786926	0.793859	0.562087	0.765441	0.837337	0.547704	0.880081	0.642034	1	1	0.155354	0.988736	0.499309	0.362006	0.292141	0.591355	0.889108	0.687078	0.166509	0.092499	0.21302	1	0.18351	1	1	0.0836084	1	0.216739	0.433083	1.00003	0.741721	0.620777	1.00799	1.00799	0.206547	0.696806	0.980369	0.045496	0.161836
Cluster_SKO1	0.351757	1.00322	0.88881	0.420319	1	0.409804	0.778875	0.436841	0.729607	0.623584	1	1	0.283917	0.885868	0.649343	0.798718	1	0.251588	1	1	0.250335	0.726581	0.497896	0.633665	0.14094	0.834373	0.681576	0.419519	1	0.359721	0.769526	1	0.258032	1	1	1	1	1	0.816224	1	0.144137	0.650956	1.00322	1.00322	1	0.994953	0.945671	0.596568	1
Cluster_SMP1	0.370258	1.0043	0.283486	1	0.0428417	0.92659	0.791669	0.871573	0.861889	1	0.565771	0.201379	1	0.48632	0.797755	0.748368	0.681554	0.418741	1	1	1	0.242213	0.601122	0.407737	0.996588	0.559821	0.880012	0.916205	1	1	0.892149	1	0.00383274	1	1	1	1	0.215609	0.830699	1.00001	0.170289	0.143803	1.0043	1.0043	1	0.962372	0.296145	0.449567	0.880402
Cluster_SOK2	0.99088	1.00451	0.687805	1	1	0.632587	0.933298	0.141036	0.690665	1	0.58355	0.591282	1	0.178457	0.219419	0.567692	1	1	1	1	1	0.94927	0.619078	0.262453	0.24455	0.470345	0.419809	0.263184	1	1	0.11013	1	0.511517	1	1	1	1	0.608183	0.784962	1.00001	0.932481	0.0663964	1.00451	1.00451	0.0819052	0.625146	0.993624	0.171415	0.354793
Cluster_sphingolipids	0.931523	1.00257	0.638448	1	1	0.99855	0.851914	1	1	0.54223	1	1	1	0.112709	0.381357	0.915805	0.496402	1	1	1	0.205806	0.956231	1	0.939807	0.966788	0.0653183	0.256924	0.406827	1	0.299923	0.725071	1	0.64579	1	1	1	1	0.41426	0.416167	1	0.184629	0.237362	1.00257	1.00257	1	0.267448	0.845243	0.658622	0.343505
Cluster_SRD1	0.150028	1.00668	0.694127	1	1	0.659243	0.927675	1	0.395388	0.86772	1	1	0.499116	0.143387	0.414798	0.855439	0.830656	0.145525	1	1	1	0.643858	0.408036	0.651938	0.998333	0.062346	0.0900144	0.263774	1	1	0.961114	1	0.461594	1	1	1	1	0.749588	0.991698	1.00002	0.738075	0.837871	1.00668	1.00668	0.157018	0.93306	0.151299	0.995135	0.833692
Cluster_STB1	0.859714	1.00343	0.860763	1	1	0.51886	0.816714	0.806248	1	1	0.486782	0.494055	1	0.0494617	0.950866	0.595077	1	0.107226	1	1	1	0.700548	1	0.876779	0.933283	0.376671	0.970263	0.985851	0.274812	1	0.828861	1	0.796388	1	1	1	0.122357	1	0.760306	1.00001	0.0689535	0.686436	1.00343	1.00343	0.0503539	0.896096	0.935951	0.993026	0.488495
Cluster_STE12	0.942742	1.00451	0.84548	1	1	0.780703	0.654605	0.6205	1	0.384923	1	1	0.373651	0.178457	0.928997	1	0.699302	0.722224	1	1	1	0.94927	1	0.665947	0.799608	0.641163	0.609514	0.994179	0.344244	0.124293	0.833007	1	0.982291	1	1	1	1	1	0.631496	1.00001	0.595155	0.0216712	1.00451	1.00451	1	0.625146	0.993624	0.946064	0.892477
Cluster_Sterols	0.818497	1.00581	0.656378	0.625733	0.365284	0.990003	0.555737	0.937521	0.991998	0.0861908	0.676	1	1	0.0645754	0.613833	0.113111	0.0149476	0.840839	1	1	1	0.966509	1	0.50601	0.688092	0.858872	0.244075	0.449037	1	0.186039	0.494508	1	0.519845	0.294602	1	1	1	0.330085	0.0839138	1.00002	0.79088	0.984274	1.00581	1.00581	1	0.856779	0.995906	0.433509	0.770939
Cluster_STP1	0.972897	1.00538	0.97706	1	1	0.997527	0.645989	0.221386	0.601531	0.804117	0.64771	0.0834337	0.427191	0.51315	0.329183	0.168574	0.76097	0.572089	1	1	1	0.999832	1	0.918471	0.607758	0.764291	0.629786	0.714184	1	0.52474	0.980883	1	0.837377	1	1	1	1	0.672385	0.987157	1.00001	0.966789	0.889368	1.00538	1.00538	0.110414	0.646495	0.999563	0.836213	0.239018
Cluster_STP2	0.793916	1.00559	0.997011	1	1	0.0791862	0.686542	0.243116	0.633991	1	1	1	1	0.219002	0.701577	0.351982	0.427559	0.17952	1	1	0.393479	0.461177	0.108442	0.657548	0.300563	0.955476	0.817543	0.796092	1	1	0.839336	1	0.856771	1	1	1	1	0.313837	0.51689	1.00001	0.57786	0.736576	1.00559	1.00559	1	0.972198	0.804989	0.996743	0.936871
Cluster_SUM1	0.821912	1.00451	0.936081	1	0.297655	0.632587	0.456801	0.6205	0.690665	0.745586	1	1	1	0.886109	0.5414	0.181767	1	1	1	1	1	0.830615	1	0.262453	0.619908	0.984193	0.903233	0.775399	1	1	0.215196	1	0.73594	1	1	1	1	0.608183	0.631496	1.00001	0.0109181	0.167992	1.00451	1.00451	0.385059	0.436141	0.877056	0.946064	0.638898
Cluster_SWI4	0.847833	1.01261	0.27461	0.34193	0.624609	0.978077	0.64742	0.33334	0.970994	0.155597	0.210214	0.436869	0.365992	0.0260399	0.571827	0.273771	0.841026	0.685709	1	1	1	0.902047	0.741525	0.435662	0.58869	0.788617	0.760531	0.336005	0.107198	0.510054	0.020743	1	0.432278	1	1	1	1	0.466477	0.03274	0.0124565	4.56133e-07	0.0132762	1.01261	1.01261	0.740326	0.348364	0.947719	0.484929	0.0274209
Cluster_SWI5	0.961879	1.00821	0.77844	0.395073	1	0.486352	0.792388	0.979909	0.155323	0.43207	0.795682	0.802508	1	0.655446	0.670078	0.861621	0.886789	0.837541	1	1	0.16206	0.986977	0.826182	0.970892	0.863199	0.651041	0.578443	0.760836	0.173608	0.305778	0.748568	1	0.339475	0.388451	1	1	0.267072	0.497954	0.159896	1.00003	0.179205	0.459608	1.00821	1.00821	0.0548593	0.83872	0.994057	0.0274461	0.540168
Cluster_SWI6	0.536942	1.00625	0.941906	0.27683	0.386365	0.778955	0.960725	0.310616	0.962552	0.553492	0.112401	0.341666	0.476195	0.0994458	0.296416	0.650254	1	0.0449828	1	1	1	0.400946	1	0.753517	0.272887	0.744401	0.330918	0.349461	0.441901	0.2075	0.483449	1	0.118086	1	1	1	1	1	0.11954	1.00002	0.00141578	0.222194	1.00625	1.00625	1	0.901085	0.757763	0.824806	0.160374
Cluster_TFs	0.729174	1.00386	0.992183	1	0.261221	0.993262	0.964803	0.252635	0.33716	1	0.527917	0.535438	1	0.990262	0.831859	0.438449	1	0.352219	1	1	1	0.999893	1	0.985277	0.683544	0.867369	0.932285	0.901004	0.303417	1	0.287017	1	1	1	1	1	1	1	0.90618	1.00001	0.886954	0.482215	1.00386	1.00386	0.340736	0.828417	0.999959	0.895479	0.268738
Cluster_THI2	0.995347	1.00516	0.573094	1	0.332314	0.714185	0.253483	0.914905	0.186032	1	1	1	0.414247	0.826982	0.266932	0.470788	0.746849	0.305219	1	1	1	0.182268	0.66826	0.581638	0.990267	0.388445	0.403799	0.279213	1	1	0.856427	1	0.623683	1	1	1	1	1	0.997594	1.00001	0.7046	0.975023	1.00516	1.00516	0.426427	0.882903	0.835033	0.807131	0.921879
Cluster_Thiamine	1	1.00236	0.999905	1	1	0.801613	1	0.676214	0.859607	1	1	1	1	0.749939	0.976772	0.635433	1	0.37378	1	1	1	0.999998	1	0.9239	0.955874	0.999425	1	0.998798	1	1	0.830539	1	0.87881	1	1	1	1	0.387528	0.992585	1	0.904566	0.477566	1.00236	1.00236	1	1	0.999999	0.967015	1
Cluster_tRNAprocessing	0.640485	1.0069	0.955013	0.688208	1	0.454324	0.746149	0.0845866	0.976208	1	0.377354	1	1	0.610359	0.475068	0.872323	0.26085	0.523337	1	1	0.122772	0.346811	0.0528264	0.0531169	0.389562	0.969612	0.200238	0.776273	1	1	0.270585	1	0.0402839	1	1	1	1	0.16102	0.998446	1.00002	0.261919	0.485353	1.0069	1.0069	1	0.945315	0.708933	0.953932	0.966707
Cluster_tRNAsynth	0.127934	1.00646	0.929543	0.66457	1	0.992502	0.677725	0.0652226	0.556455	1	1	0.127009	1	0.933405	0.771638	0.836692	1	1	1	1	0.438527	0.949919	0.392033	0.965328	0.0973263	0.941594	0.688952	0.962125	1	1	0.947137	1	0.793751	0.321517	1	1	0.217362	1	0.999874	1.00002	0.855704	0.82079	1.00646	1.00646	1	0.999656	0.992923	0.976061	0.958788
Cluster_Tryptophan	0.205204	1.00257	0.989224	0.353434	1	0.707142	0.168926	0.00379122	0.310515	0.54223	0.393513	1	1	0.79324	0.610254	0.684082	1	0.775011	1	1	1	0.956231	1	0.471833	0.0131301	0.591082	0.484753	0.938518	0.214071	0.299923	0.883274	1	0.899994	0.143463	1	0.0278463	1	1	0.654502	1	0.702426	0.237362	1.00257	1.00257	1	0.0362109	0.970084	1	0.343505
Cluster_UGA3	0.267016	1.00473	0.649653	0.550829	1	0.384453	0.176695	0.895455	0.721625	1	1	1	0.387483	0.579272	0.15738	0.606966	0.716065	0.935295	1	1	0.344861	0.813153	0.258901	0.703372	0.2877	0.554399	0.165604	0.379889	1	1	0.0765525	0.0324319	0.171536	1	1	1	1	0.625321	0.735079	1.00001	0.823954	0.841415	1.00473	1.00473	0.0887951	0.827707	0.863515	0.0160493	0.0628634
Cluster_USV1	0.98474	1.00603	0.89132	1	1	0.909386	0.426733	0.522085	0.49132	0.839019	0.31729	1	1	0.634372	0.890895	0.793097	1	0.416499	1	1	1	0.879955	0.724142	0.865343	0.856819	0.685026	0.754804	0.39771	1	1	0.275806	1	0.889563	1	1	1	1	0.713564	0.983147	1.00002	0.283145	1	1.00603	1.00603	1	0.880656	0.978009	0.0990346	0.948991
Cluster_Vacuole	0.988341	1.01461	0.998034	0.913661	0.677913	0.863215	0.560514	0.991698	0.292717	0.93088	1	0.943249	0.776902	0.681289	0.261799	0.254497	0.514941	0.810875	1	1	0.365089	0.999518	1	0.997475	0.713497	0.802911	0.504187	0.556788	0.385717	0.865044	0.982478	1	0.755043	0.580957	1	1	1	0.797	0.999753	1.0001	0.982839	0.236573	1.01461	1.01461	1	0.164322	0.999555	0.530111	0.516986
Node 1	1	1.00128	0.989057	1	0.0958757	0.721901	0.829892	0.001133	1	1	1	1	1	0.785975	0.792808	0.709581	0.290193	1	1	1	1	0.941931	1	0.754408	0.00433463	0.982866	0.874893	0.983391	1	1	0.975848	1	1	1	1	1	1	1	0.696243	1	0.722152	1	1.00128	1.00128	0.129508	0.879139	0.955699	0.844291	1
Node 10	0.00631307	1.00214	0.744314	1	1	0.881608	0.0844884	1	0.832139	1	1	1	1	1	0.410741	0.872762	0.102877	1	1	1	1	0.973578	1	1	0.464682	0.603312	0.330748	0.572489	1	1	0.913453	1	0.853146	1	1	1	1	1	0.931586	1	1	0.784528	1.00214	1.00214	1	0.845758	0.886143	0.263412	1
Node 11	0.147885	1.0015	0.888418	1	1	0.828897	0.254981	1	0.320691	1	1	0.257541	1	0.834507	0.323834	0.384838	1	1	1	1	1	0.991015	1	0.446723	0.86261	0.991307	0.654946	0.83422	0.131027	1	0.987023	1	0.0206047	0.00325031	1	1	1	1	0.959316	1	0.775596	1	1.0015	1.0015	1	0.345383	0.994072	0.595103	1
Node 12	0.738066	1.00128	0.926824	1	1	0.921278	0.829892	0.459223	1	1	1	1	1	0.409495	0.792808	1	1	0.525429	1	1	1	0.941931	1	0.365626	0.817528	0.641218	0.563884	0.68998	1	1	0.582874	1	0.0698485	1	1	1	1	0.234529	0.696243	1	1	0.601691	1.00128	1.00128	1	1	0.955699	0.196054	0.470636
Node 13	0.802516	1.003	0.535123	0.398826	1	0.0513379	0.907031	1	0.183429	0.21909	1	1	1	0.192722	0.356255	0.254844	1	0.498989	1	1	1	0.752654	1	1	1	0.992455	0.824772	0.273456	1	1	0.855049	1	0.931909	1	1	1	0.107899	1	0.950027	1	0.949768	0.883502	1.003	1.003	1	0.992814	0.802085	0.307818	0.41828
Node 14	0.413991	1.00451	0.936081	1	1	0.780703	0.456801	0.884126	0.456298	0.745586	1	0.591282	1	0.886109	0.928997	0.986901	0.699302	0.926698	1	1	1	0.830615	1	1	0.799608	0.892862	0.781322	0.775399	1	1	0.533359	1	0.298051	1	1	1	1	0.608183	0.994704	1.00001	0.932481	1	1.00451	1.00451	1	0.909795	0.877056	0.946064	1
Node 15	0.081335	1.00343	0.687242	1	1	0.707368	0.942466	0.806248	0.105504	1	1	1	1	0.738057	0.0767982	0.82781	0.599499	0.107226	1	1	1	0.979832	1	0.876779	0.795113	0.376671	0.0648765	0.563548	1	1	0.977669	1	0.953647	1	1	1	1	0.510066	0.986861	1.00001	0.967262	0.686436	1.00343	1.00343	1	0.745469	0.935951	0.952333	0.816974
Node 16	1	1.00107	0.782487	1	1	1	0.771432	1	1	0.277709	1	1	1	0.723228	0.692376	0.234524	1	0.46262	1	1	1	0.959485	1	0.689611	1	0.177521	0.823058	0.797346	1	0.137962	0.761694	1	1	1	1	1	1	1	0.801997	1	0.655998	1	1.00107	1.00107	1	1	0.969286	0.401726	1
Node 17	1	1.00021	0.822412	1	1	1	1	1	1	1	1	1	1	0.226467	1	1	1	1	1	1	1	0.931697	1	0.208538	1	0.491996	1	1	1	1	0.462113	1	1	1	1	1	1	1	0.674707	1	0.192102	1	1.00021	1.00021	1	0.296692	0.941089	0.266382	1
Node 18	1	1.00085	0.852668	1	1	0.740101	1	1	1	1	1	1	1	0.642108	0.55449	1	1	1	1	1	1	0.974552	1	1	1	0.675476	0.335312	0.893237	1	1	0.628698	1	1	1	1	1	1	1	1	1	1	0.458571	1.00085	1.00085	1	1	0.980831	1	1
Node 19	1	1.00021	1	1	1	1	1	1	1	1	1	1	1	1	1	1	1	1	1	1	1	1	1	1	1	1	1	1	1	1	1	1	1	1	1	1	1	1	1	1	1	1	1.00021	1.00021	1	1	1	1	1
Node 2	0.919923	1.00712	0.997251	0.699399	1	0.868842	0.949602	0.000814528	0.811221	0.345019	1.60508e-10	0.755332	0.521044	0.323286	0.268347	0.261645	1	0.340168	1	1	0.129146	0.998669	1	0.54874	0.00250581	0.991496	0.364445	0.911126	1	0.625737	0.463407	1	0.349658	1	1	0.0748865	0.236376	0.771062	0.473823	1.00002	0.999147	0.710309	1.00712	1.00712	8.26991e-05	0.807754	0.999917	0.987731	0.65893
Node 2_fuzzy0.06	0.993523	1.01062	0.991726	0.832684	1	0.861967	0.911276	4.8988e-08	0.270815	0.372469	3.20096e-11	0.876822	0.66545	0.306956	0.273486	0.187328	0.765156	0.516613	1	1	0.238389	0.999647	1	0.910938	1.10359e-06	0.90755	0.350312	0.850827	1	0.768194	0.0811035	1	0.640492	1	1	0.109327	0.00701533	0.888416	0.453402	1.00005	0.999652	0.715693	1.01062	1.01062	1.18014e-05	0.82981	0.999905	0.987853	0.556047
Node 20	1	1.00257	0.999999	1	1	1	0.851914	1	0.882586	1	1	1	1	0.954297	0.998483	1	1	0.775011	1	1	1	1	1	0.939807	1	0.999709	0.984398	0.999532	1	1	1	1	1	1	1	1	1	1	0.999999	1	1	0.841553	1.00257	1.00257	0.242381	0.98544	1	0.975822	1
Node 21	0.977645	1.00365	1	1	1	0.999581	0.954941	1	0.792058	1	1	1	1	0.924399	0.998664	1	1	0.879301	1	1	1	1	1	1	0.947152	0.99999	0.977848	0.998406	1	1	1	1	0.961758	1	1	1	1	1	0.999967	1.00001	1	0.442965	1.00365	1.00365	0.32527	1	1	1	1
Node 22	1	1.00064	0.916649	1	1	0.90043	1	1	0.4143	1	1	1	1	1	0.37704	0.0909718	1	1	1	1	1	0.986677	1	1	1	1	0.646155	0.747216	1	1	0.443266	1	0.437307	1	1	1	1	1	0.965625	1	0.472767	0.368782	1.00064	1.00064	1	0.652208	0.990029	0.605262	1
Node 23	1	1.00064	1	1	1	1	1	1	1	1	1	1	1	1	1	1	1	1	1	1	1	1	1	1	1	1	1	1	1	1	1	1	1	1	1	1	1	1	1	1	1	1	1.00064	1.00064	1	1	1	1	1
Node 24	1	1.00021	1	1	1	1	1	1	1	1	1	1	1	1	1	1	1	1	1	1	1	1	1	1	1	1	1	1	1	1	1	1	1	1	1	1	1	1	1	1	1	1	1.00021	1.00021	1	1	1	1	1
Node 25	1	1.00021	0.822412	1	1	0.536393	1	1	1	1	0.0407684	1	1	1	0.417289	0.186126	1	1	1	1	1	0.931697	1	1	0.246745	1	1	0.671505	1	1	1	1	1	1	1	1	1	1	0.674707	1	1	1	1.00021	1.00021	1	1	0.941089	1	1
Node 26	1	1.00043	1	1	1	1	1	1	1	1	1	1	1	1	1	1	1	1	1	1	1	1	1	1	1	1	1	1	1	1	1	1	1	1	1	1	1	1	1	1	1	1	1.00043	1.00043	1	1	1	1	1
Node 27	1	1.00085	0.999011	1	1	0.953873	0.692902	1	1	0.229128	1	0.156427	1	0.642108	0.55449	0.561367	1	1	1	1	1	0.974552	1	0.60774	0.6782	0.675476	0.749769	0.601196	1	0.111972	0.628698	1	1	0.0502674	1	1	1	1	0.606888	1	0.168724	0.458571	1.00085	1.00085	1	0.755461	0.980831	0.710481	0.0527469
Node 28	1	1.00021	1	1	1	1	1	1	1	1	1	1	1	1	1	1	1	1	1	1	1	1	1	1	1	1	1	1	1	1	1	1	1	1	1	1	1	1	1	1	1	1	1.00021	1.00021	1	1	1	1	1
Node 29	1	1.00085	0.852668	1	1	0.953873	0.0538529	0.336177	0.509999	1	0.153416	1	1	0.642108	0.88481	0.561367	0.20424	0.391515	1	1	1	0.998801	1	0.60774	0.256191	0.675476	1	0.893237	1	1	0.628698	1	0.535495	1	1	1	1	1	0.606888	1	0.168724	1	1.00085	1.00085	0.0883004	0.342448	0.980831	1	0.345548
Node 3	1	1.00538	1	1	1	1	1	1	1	0.804117	1	1	1	1	0.999999	1	1	1	1	1	1	1	1	1	1	1	0.99983	1	1	0.52474	1	1	0.991805	1	1	1	1	1	1	1.00001	1	1	1.00538	1.00538	1	0.999853	1	1	1
Node 30	1	1.00171	0.993912	1	1	0.445284	0.905802	0.178891	0.760059	1	1	1	1	0.571763	0.91074	0.807751	1	1	1	1	1	0.9988	1	1	0.624952	0.961323	0.730096	0.751339	0.148302	1	0.800237	1	0.784391	1	1	1	1	1	0.920221	1	0.818769	1	1.00171	1.00171	1	0.439833	0.999317	0.672599	1
Node 31	0.986794	1.00799	0.999997	1	1	0.672945	0.976399	0.888087	0.954735	1	0.786926	1	1	0.765441	0.907914	0.978643	1	0.258609	1	1	1	0.999997	1	0.990262	0.990207	0.987353	0.537356	0.967279	0.525149	1	0.994944	1	0.907773	1	1	1	1	1	0.999806	1.00003	0.741721	0.79223	1.00799	1.00799	0.576066	0.981274	0.999999	0.898756	0.980479
Node 32	0.981499	1.00581	0.999726	1	1	0.778831	0.941577	0.754498	0.949554	1	1	0.683719	0.452235	0.962384	0.613833	0.113111	0.786902	0.625986	1	1	1	0.991583	1	0.941725	0.833087	0.928815	0.931402	0.859627	1	1	0.77703	1	0.519845	1	1	1	1	0.700444	0.934249	1.00002	0.976887	0.913455	1.00581	1.00581	1	0.937082	0.995906	0.76481	0.285167
Node 33	1	1.00064	0.916649	1	1	0.554504	1	1	0.0712217	1	1	1	1	1	0.37704	0.460976	1	0.311021	1	1	1	0.986677	1	1	1	1	0.646155	0.747216	1	1	0.844463	1	1	1	1	1	1	1	0.965625	1	0.472767	1	1.00064	1.00064	1	0.652208	0.990029	0.605262	0.272348
Node 34	1	1.0015	0.639079	1	1	0.958231	0.87341	0.143008	0.320691	1	1	1	1	0.834507	0.863022	0.384838	1	0.580909	1	1	1	0.922297	1	1	0.0674459	0.760269	0.911551	0.83422	1	1	0.706871	1	1	1	1	1	1	0.267903	0.959316	1	0.775596	1	1.0015	1.0015	0.149415	0.345383	0.94035	0.0865152	1
Node 35	1	1.00279	1	1	1	1	1	1	1	1	1	1	1	1	1	1	1	1	1	1	1	1	1	1	1	1	1	1	1	1	1	1	1	1	1	1	1	1	1	1	1	1	1.00279	1.00279	1	1	1	1	1
Node 36	0.999992	1.04123	0.999388	0.0588614	0.813603	0.999598	0.888874	0.790963	0.93394	0.170385	0.323626	0.640754	0.371301	0.849475	0.90289	0.369783	0.801701	0.985166	1	0.242352	0.679245	1	0.9998	0.999882	0.99236	0.91442	0.870028	0.985363	0.49132	0.0393382	0.946534	0.242352	0.982838	0.00201329	1	1	0.779473	0.541932	0.950358	1.00079	0.980947	0.763887	1.04123	1.04123	0.402591	4.19813e-05	1	3.78515e-08	0.013717
Node 37	0.79052	1.0015	0.888418	1	1	0.579239	0.568787	0.511925	0.71315	0.365906	1	0.257541	0.144195	0.494784	0.863022	0.763705	1	0.580909	1	1	1	0.991015	1	1	0.236748	0.932222	0.654946	0.957579	1	1	0.706871	1	0.351925	1	1	1	1	1	0.838996	1	0.134569	0.658386	1.0015	1.0015	1	0.915043	0.994072	0.885822	1
Node 38	1	1.00107	0.957941	1	1	0.568025	1	0.400843	0.590078	1	1	1	1	0.723228	0.347661	0.234524	1	1	1	1	1	0.959485	1	1	0.75767	0.966237	0.153361	0.797346	1	1	0.955057	1	0.616568	1	1	1	1	1	0.801997	1	1	0.535604	1.00107	1.00107	1	0.828076	0.969286	1	1
Node 39	0.75462	1.00777	0.999822	0.369387	1	0.995762	0.991023	0.0550479	0.120279	0.672198	0.0144062	1	0.186963	0.857122	0.199656	0.0034766	1	0.619901	1	1	0.148705	1	1	0.988275	0.154725	0.770042	0.936229	0.976003	1	0.657845	0.646856	1	0.777764	1	1	1	0.254941	0.46933	0.990807	1.00003	0.848723	0.773694	1.00777	1.00777	0.0479612	0.942419	1	0.782052	0.978278
Node 4	1	1.00236	0.999076	0.329476	0.168795	0.997108	0.561875	0.291262	0.0224033	1	1	1	1	0.224055	0.976772	1	1	1	1	1	1	0.999967	1	0.9239	0.53483	0.876349	0.877148	0.992074	1	1	0.830539	1	1	1	1	1	1	1	0.966331	1	0.356353	0.477566	1.00236	1.00236	1	0.420717	0.999986	0.967015	1
Node 40	1	1.00365	1	1	1	1	1	1	1	1	1	1	1	1	1	1	1	1	1	1	1	1	1	1	1	0.99999	1	1	1	1	1	1	1	1	1	1	1	1	1	1.00001	1	1	1.00365	1.00365	1	1	1	1	1
Node 41	0.914353	1.00236	0.999993	1	1	1	0.814332	0.676214	0.262339	0.511391	0.367674	0.373844	1	0.940875	0.902732	0.635433	1	1	1	1	1	1	1	0.70274	0.796426	0.963391	0.877148	0.992074	1	0.278783	0.944545	0.0163305	1	0.132325	1	1	1	1	0.99889	1	0.904566	0.815224	1.00236	1.00236	1	0.882823	1	0.834883	0.688639
Node 42	1	1.00107	0.995756	1	1	0.854819	1	1	0.590078	1	1	1	1	1	0.692376	0.643078	1	1	1	1	1	0.999899	1	1	0.75767	0.966237	0.823058	0.957164	1	1	0.955057	1	1	1	1	1	1	0.199642	1	1	1	1	1.00107	1.00107	1	1	0.999944	0.401726	1
Node 43	1	1.00085	0.852668	1	1	0.953873	1	1	1	1	1	1	1	0.642108	0.55449	0.159804	1	0.391515	1	1	1	0.974552	1	1	1	1	0.749769	0.893237	1	1	0.916385	1	0.535495	1	1	1	1	0.010682	0.896	1	0.574115	0.458571	1.00085	1.00085	0.0883004	1	0.980831	0.710481	1
Node 44	1	1.00064	0.916649	1	1	0.90043	1	1	1	0.177291	1	1	1	1	0.80223	0.460976	1	1	1	1	1	0.986677	0.12856	0.504302	1	0.868982	1	0.964599	1	1	0.844463	1	1	1	1	1	1	0.12505	0.751444	1	1	1	1.00064	1.00064	1	0.21179	0.990029	0.605262	0.272348
Node 45	0.548302	1.01528	0.991947	0.719573	0.325746	0.955457	0.889378	0.920427	0.999622	0.149215	0.319004	0.165203	1	0.971613	0.744642	0.672773	0.550068	0.842693	1	1	0.147054	1	1	0.970639	0.995479	0.828642	0.909107	0.983812	0.161336	0.0158531	0.106818	1	0.88366	0.597082	1	0.152761	1	0.594336	0.579798	1.00011	0.814753	0.113262	1.01528	1.01528	0.803958	0.02303	1	0.0339615	0.267709
Node 46	1	1.00107	1	1	1	1	1	1	1	1	1	1	1	1	1	1	1	1	1	1	1	1	1	1	1	1	1	1	1	1	1	1	1	1	1	1	1	1	1	1	1	1	1.00107	1.00107	1	1	1	1	1
Node 47	1	1.00064	1	1	1	1	1	1	1	1	1	1	1	1	1	1	1	1	1	1	1	1	1	1	1	1	1	1	1	1	1	1	1	1	1	1	1	1	1	1	1	1	1.00064	1.00064	1	1	1	1	1
Node 48	0.738066	1.00128	0.710319	1	1	0.414148	0.829892	0.459223	0.657084	1	0.2211	1	1	0.409495	0.203808	0.0824507	1	1	1	1	1	0.653952	1	0.365626	0.458383	0.328758	0.563884	0.360654	1	1	0.851104	1	1	0.0744608	1	0.0140125	1	0.234529	0.0941929	1	0.722152	0.601691	1.00128	1.00128	1	0.879139	0.694538	0.844291	1
Node 49	1	1.00085	0.999011	1	1	1	1	1	1	1	1	1	1	1	1	1	1	1	1	1	1	0.999979	1	0.60774	1	0.933483	1	1	1	1	1	1	1	1	1	1	1	1	1	1	1	1	1.00085	1.00085	1	1	0.999988	1	1
Node 5	1	1.00107	0.782487	1	1	0.978636	0.378785	1	1	1	0.187959	1	1	0.723228	1	1	1	1	1	1	1	0.959485	1	1	1	0.802468	1	0.47043	1	1	0.761694	1	1	1	1	1	1	1	0.958668	1	0.24658	0.535604	1.00107	1.00107	1	0.828076	0.969286	1	1
Node 50	1	1.00085	0.852668	1	1	0.740101	0.692902	1	0.509999	1	1	1	1	0.642108	0.55449	0.561367	1	0.391515	1	1	1	0.753456	1	1	0.6782	0.675476	0.749769	0.601196	1	1	0.628698	1	0.535495	1	1	1	1	1	0.207105	1	0.168724	0.458571	1.00085	1.00085	1	0.0811324	0.784309	1	1
Node 51	1	1.00085	0.98063	1	1	0.368907	0.270984	1	0.509999	0.229128	1	1	1	1	0.55449	0.159804	1	1	1	1	1	0.974552	1	0.60774	0.6782	0.933483	0.749769	0.893237	1	1	1	1	0.535495	1	1	1	1	1	0.896	1	1	1	1.00085	1.00085	1	0.755461	0.980831	1	1
Node 52	1	1.00021	0.822412	1	1	0.536393	1	1	0.163287	1	1	1	1	1	0.417289	1	1	1	1	1	1	0.931697	1	1	0.246745	1	0.292636	0.671505	1	1	0.462113	1	1	1	1	1	1	1	0.674707	1	1	1	1.00021	1.00021	1	1	0.941089	1	1
Node 53	0.738066	1.00128	0.710319	1	1	0.721901	1	1	0.255045	0.0500637	1	0.0231448	1	0.133895	0.491513	0.31056	1	0.148574	1	1	1	0.941931	0.240662	0.109517	0.16419	0.101903	0.874893	0.68998	1	0.0117877	0.582874	1	1	1	1	1	1	0.0252045	0.367102	1	0.722152	0.601691	1.00128	1.00128	0.129508	0.57276	0.955699	0.504562	0.115212
Node 54	0.738066	1.00128	0.926824	1	1	0.921278	0.178099	0.459223	0.657084	1	1	0.225253	1	0.409495	0.792808	0.709581	1	0.148574	1	1	1	0.941931	1	1	0.16419	0.328758	0.874893	0.360654	1	1	0.275533	1	0.683505	1	1	1	1	1	0.367102	1	1	0.601691	1.00128	1.00128	0.00730063	0.879139	0.955699	1	0.470636
Node 55	0.79052	1.0015	0.997327	1	1	0.958231	1	1	1	1	1	1	1	0.834507	1	1	1	1	1	1	1	0.999973	1	1	1	1	1	0.993716	1	1	0.908797	1	1	1	1	1	1	1	0.999618	1	0.775596	0.658386	1.0015	1.0015	1	0.915043	0.999987	1	1
Node 56	0.79052	1.0015	0.997327	1	1	0.958231	1	1	1	1	1	1	1	0.834507	1	1	1	1	1	1	1	0.999973	1	1	1	1	1	0.993716	1	1	0.908797	1	1	1	1	1	1	1	0.999618	1	0.775596	0.658386	1.0015	1.0015	1	0.915043	0.999987	1	1
Node 57	0.262676	1.00107	0.957941	1	1	0.978636	1	0.400843	0.590078	0.277709	1	0.191568	1	1	0.347661	0.234524	1	1	1	1	1	0.997153	1	0.280256	0.75767	0.484988	0.153361	0.797346	1	1	0.761694	1	0.616568	1	1	1	1	1	1	1	1	0.535604	1.00107	1.00107	1	1	0.998149	0.787669	1
Node 58	0.738066	1.00128	0.926824	1	1	0.921278	0.829892	1	0.657084	1	1	1	1	0.409495	0.960941	1	1	1	1	1	1	0.941931	1	0.365626	1	0.883093	0.874893	0.904711	0.113405	1	0.975848	1	0.683505	1	1	1	1	1	0.367102	1	0.325227	0.601691	1.00128	1.00128	1	0.57276	0.694538	1	1
Node 59	0.672495	1.00107	0.957941	0.166033	1	1	0.771432	1	1	1	1	1	1	0.723228	0.692376	1	1	1	1	1	0.0914807	0.959485	1	0.280256	0.75767	0.966237	0.456612	0.957164	0.0954291	1	0.955057	1	0.616568	1	1	1	1	1	0.801997	1	0.655998	1	1.00107	1.00107	1	0.828076	0.969286	0.787669	1
Node 6	0.498505	1.00279	0.935498	1	1	0.605737	0.882429	1	0.651928	0.00699431	1	1	1	0.592308	0.693616	0.727273	1	0.801348	1	1	0.220932	0.99989	1	0.78879	0.657799	0.689288	0.556389	0.992151	1	0.320448	0.608015	1	0.917478	0.154461	1	1	1	1	0.907973	1	0.469098	0.864135	1.00279	1.00279	1	0.569225	0.994485	0.470631	0.381374
Node 60	0.488082	1.00064	0.994416	1	1	0.90043	1	1	1	1	1	1	1	1	0.80223	1	1	1	1	1	1	0.999684	1	0.504302	1	0.868982	0.646155	0.964599	1	1	1	1	1	1	1	1	1	1	0.965625	1	1	0.368782	1.00064	1.00064	1	1	0.999798	0.605262	1
Node 61	1	1.00171	0.999376	0.25218	1	0.997881	0.335143	1	0.760059	0.405893	1	1	1	1	1	1	1	1	1	1	1	0.999998	1	1	1	0.961323	1	0.981866	1	0.211487	0.993029	1	0.784391	1	1	1	1	1	0.982773	1	0.473384	1	1.00171	1.00171	1	0.940287	0.999999	1	1
Node 62	0.892884	1.00214	0.744314	1	1	0.881608	0.236924	0.641218	1	1	1	1	1	0.402927	0.995517	0.872762	0.435334	0.329131	1	1	1	0.999727	1	0.903794	0.941379	0.357272	1	0.928498	1	1	0.527072	1	0.542237	1	1	1	1	1	0.931586	1	0.600117	0.42666	1.00214	1.00214	0.206468	0.608534	0.886143	0.523105	0.653756
Node 63	1	1.00021	0.822412	1	1	0.536393	1	1	0.163287	0.0629669	1	1	1	1	0.417289	1	1	1	1	1	1	0.931697	1	1	1	1	0.292636	0.671505	1	0.0292423	0.462113	1	0.174386	1	1	1	1	1	0.674707	1	1	1	1.00021	1.00021	1	1	0.941089	1	1
Node 64	0.678193	1.00236	0.968529	0.00594278	1	0.92732	0.561875	0.676214	1	0.511391	0.367674	1	1	0.940875	0.902732	0.635433	0.121296	1	1	1	0.19039	0.995202	1	0.9239	0.955874	0.103023	0.877148	0.992074	0.198116	0.278783	0.634375	1	0.298032	1	1	1	1	0.387528	0.966331	1	1	0.815224	1.00236	1.00236	0.22463	0.420717	0.997204	0.594556	0.688639
Node 65	0.202941	1.00171	0.570712	1	0.125772	0.445284	0.335143	1	0.760059	0.405893	1	1	0.163038	0.263849	0.91074	0.45538	1	1	1	1	1	0.900949	1	1	0.896561	0.619179	1	0.480077	1	1	0.55126	1	1	1	1	1	1	1	0.208353	1	0.473384	0.707021	1.00171	1.00171	1	0.439833	0.615009	0.672599	0.571857
Node 66	0.2	1.00021	0.822412	1	0.0166489	1	0.255496	1	1	1	1	1	1	1	1	1	1	1	1	1	1	0.931697	1	1	1	0.491996	1	0.671505	1	1	0.462113	1	0.174386	1	1	1	1	1	1	1	1	0.142156	1.00021	1.00021	1	0.296692	0.941089	1	1
Node 67	0.166736	1.00777	0.99341	0.369387	1	0.608331	0.850521	0.695125	0.722663	0.904669	0.435149	1	1	0.935242	0.803095	0.684781	0.872977	0.934757	1	1	1	0.997577	1	0.997749	0.695642	0.982063	0.7692	0.324403	1	1	0.762354	1	0.895952	0.372353	1	1	1	0.799885	0.978316	1.00003	0.71621	0.595386	1.00777	1.00777	1	0.880297	0.999068	0.993848	0.978278
Node 68	0.219466	1.00538	0.723915	1	1	0.643945	0.645989	0.715101	0.80004	0.0684472	0.271382	1	1	0.986621	0.948122	0.961357	0.76097	0.955503	1	1	0.38167	0.482593	1	0.997159	0.423791	0.869529	0.784685	0.963421	1	0.52474	0.0561648	1	0.657228	1	1	1	1	1	0.922531	1.00001	0.735907	0.889368	1.00538	1.00538	1	0.990346	0.561756	0.836213	0.929773
Node 69	1	1.00043	0.67633	1	1	0.287664	1	1	1	1	1	1	1	1	1	1	1	1	1	1	1	0.868046	1	1	1	1	1	0.892138	1	1	0.710731	1	1	1	1	1	1	0.0851993	1	1	1	1	1.00043	1.00043	1	0.505402	0.885636	0.461846	1
Node 7	0.989136	1.05247	0.999898	0.425815	0.329896	0.988816	0.9964	0.72541	0.270078	0.0798354	0.325347	0.350269	0.00131334	0.840207	0.929211	0.888567	0.620172	0.417033	1	0.294931	0.140883	1	0.99973	0.999992	0.604731	0.691025	0.859793	0.998306	0.0815049	0.0151636	0.651109	1	0.511548	0.165784	1	0.0971155	0.85096	0.538473	0.999839	1.00126	0.985573	0.484761	1.05247	1.05247	0.421558	0.0404931	1	8.59865e-14	0.274246
Node 70	1	1.00043	0.67633	1	1	0.287664	1	0.00945474	1	1	1	1	1	1	0.174078	0.0346105	1	1	1	1	1	0.868046	1	1	0.0608434	1	1	0.450872	1	1	0.213495	1	1	1	1	1	1	1	0.455182	1	1	0.0201822	1.00043	1.00043	1	1	0.885636	1	1
Node 71	1	1.00085	0.852668	1	1	0.953873	0.0538529	1	1	1	1	1	1	0.642108	0.0302671	0.561367	0.20424	1	1	1	1	0.753456	1	1	1	0.933483	0.00731081	0.2032	0.0770932	1	0.916385	1	0.535495	1	1	1	1	1	0.207105	1	1	1	1.00085	1.00085	1	0.755461	0.784309	1	1
Node 72	0.223775	1.05421	1	0.131441	0.982547	0.999988	0.930389	0.203728	0.810142	0.627446	0.967705	0.27199	0.767979	0.972056	0.956634	0.707371	0.914085	0.991933	1	1	1	1	0.983401	0.858716	0.646392	0.999996	0.821472	0.999993	0.992052	0.381264	0.995018	0.302651	0.783452	0.811773	1	1	0.297034	0.704258	1	1.00134	0.604365	0.991531	1.05421	1.05421	0.629615	0.999968	1	1	0.819807
Node 73	0.219871	1.14946	1	0.754587	0.75462	1	0.959181	0.979745	0.802156	0.999748	0.99073	0.204975	0.990571	0.999979	1	0.99996	0.99971	0.999814	0.323995	1	0.931545	1	7.00454e-33	1.54303e-26	0.99993	1	0.999933	1	0.977944	0.999606	1	0.59901	0.994996	0.873962	1	1	0.0845759	0.998333	1	1.00891	1	0.999905	1.14946	1.14946	0.960051	1	1	1	0.993244
Node 74	1	1.0015	0.978031	1	1	0.958231	1	1	0.71315	1	1	1	0.144195	1	0.977261	1	1	0.580909	1	1	1	0.999973	1	0.805689	0.86261	0.991307	0.911551	0.957579	1	1	0.987023	1	0.738768	1	1	1	1	1	0.959316	1	1	1	1.0015	1.0015	1	0.663711	0.999642	0.885822	1
Node 75	0.0578216	1.00107	0.999825	1	1	0.978636	1	1	1	1	1	1	1	0.723228	0.692376	1	1	1	1	1	1	0.997153	1	0.280256	1	0.966237	0.456612	0.957164	1	1	0.761694	1	1	1	1	1	1	1	0.476816	1	1	0.535604	1.00107	1.00107	1	1	0.969286	1	1
Node 76	0.423342	1.0015	0.888418	1	1	0.29033	0.87341	0.511925	0.71315	1	1	1	1	0.834507	0.977261	1	0.329635	1	1	1	1	0.991015	1	0.805689	0.547037	0.482484	0.911551	0.957579	1	1	0.706871	1	0.0206047	0.0863293	1	1	1	1	0.959316	1	0.775596	1	1.0015	1.0015	1	0.345383	0.94035	1	0.523923
Node 77	1	1.00021	0.822412	1	1	1	1	1	0.163287	1	1	1	1	1	0.417289	0.186126	1	1	1	1	0.0189968	0.931697	1	1	1	0.491996	1	0.671505	1	1	0.462113	1	1	1	1	1	1	1	0.674707	1	0.192102	1	1.00021	1.00021	1	1	0.941089	1	1
Node 78	1	1.00021	0.822412	1	1	1	0.255496	1	1	1	1	1	1	1	0.417289	1	1	1	1	1	1	0.931697	1	1	1	0.491996	0.292636	0.671505	1	1	1	1	1	1	1	1	1	1	0.674707	1	1	1	1.00021	1.00021	1	1	0.941089	1	1
Node 79	0.103938	1.00064	0.556171	1	1	0.90043	0.0166473	1	0.4143	1	1	1	0.0645292	0.130571	0.0725977	0.0909718	1	0.311021	1	1	1	0.80873	1	1	1	0.487992	0.646155	0.302699	1	1	0.443266	1	1	1	1	1	1	1	0.307051	1	0.0964704	0.368782	1.00064	1.00064	1	1	0.83344	1	0.272348
Node 8	0.960072	1.01819	0.999998	0.952155	0.754862	0.977324	0.978745	0.832091	0.0422502	0.266471	0.859334	0.456458	0.274992	0.923492	0.967558	0.871489	0.492116	0.934186	1	1	0.208555	1	0.978525	0.999994	0.48953	0.831556	0.954182	0.999984	0.813451	0.0944846	0.903795	1	0.9941	0.66019	1	1	0.494379	0.975974	0.999048	1.00016	0.99814	0.285997	1.01819	1.01819	0.29444	0.692557	1	0.13634	0.321281
Node 80	0.914353	1.00236	0.885085	1	1	0.92732	0.814332	9.62685e-07	1	0.511391	0.367674	1	1	0.749939	0.51488	0.336556	1	1	1	1	1	0.965469	1	1	0.00106674	0.707474	0.40881	0.723215	1	0.278783	0.634375	1	0.298032	1	1	0.025553	1	1	0.992585	1	0.654287	0.815224	1.00236	1.00236	1	0.882823	0.976563	0.967015	0.688639
Node 81	0.423342	1.0015	0.639079	1	1	0.29033	0.568787	0.00244081	1	0.365906	1	1	1	0.494784	0.617273	0.384838	0.329635	1	1	1	1	0.922297	1	0.446723	0.0674459	0.760269	0.654946	0.83422	1	0.187698	0.706871	1	0.351925	1	1	1	0.0554486	1	0.589179	1	1	0.658386	1.0015	1.0015	0.149415	0.345383	0.94035	1	1
Node 82	0.55219	1.003	0.535123	1	1	0.947362	0.274557	0.762052	0.917885	0.598208	1	1	1	0.394945	0.763771	0.76535	0.550888	0.0709618	1	1	1	0.752654	1	0.962347	0.894601	0.371804	0.824772	0.111937	1	1	0.490758	1	0.931909	1	1	1	1	1	0.985414	1	0.5221	0.126023	1.003	1.003	1	0.404934	0.802085	0.142384	0.41828
Node 83	0.892884	1.00214	0.446977	1	1	0.70895	1	1	1	1	1	1	1	0.699041	0.410741	0.872762	0.435334	0.711426	1	1	1	0.854367	0.368114	0.348063	0.464682	0.81494	0.137688	0.796897	1	1	0.527072	1	0.079985	1	1	1	1	0.359582	0.318061	1	0.298397	0.42666	1.00214	1.00214	1	0.0447844	0.886143	0.523105	0.0709098
Node 84	0.563986	1.00193	0.506444	1	1	0.589006	1	1	0.799305	1	1	1	0.181471	0.333569	0.942502	0.843595	1	0.0143098	1	1	1	0.878209	1	0.589365	0.692027	0.238186	0.790841	0.662252	1	1	0.407395	1	0.196525	1	1	1	1	1	0.397013	1	0.853644	1	1.00193	1.00193	1	0.262659	0.905353	0.197448	0.053517
Node 85	1	1.00085	0.852668	1	1	0.740101	0.692902	1	0.509999	0.229128	1	1	1	0.642108	0.0302671	0.561367	1	0.391515	1	1	0.0738722	0.753456	1	0.60774	0.6782	0.675476	0.00731081	0.2032	0.0770932	0.111972	0.257835	1	0.14274	1	1	1	0.0320615	1	0.606888	1	1	0.0994161	1.00085	1.00085	1	0.342448	0.784309	0.710481	0.345548
Node 86	0.901362	1.00386	0.355633	1	1	0.346978	0.995117	1	0.959858	0.314727	1	1	0.0582714	0.205517	0.831859	0.874886	0.642866	0.150141	1	1	1	0.879646	0.191804	0.535557	0.858407	0.738184	0.642483	0.79038	1	1	0.287017	0.0266032	0.968451	1	1	1	1	1	0.440764	0.00384905	0.0126463	0.246715	1.00386	1.00386	1	0.0191782	0.91433	0.0786983	1
Node 87	1	1.00171	0.962151	1	1	0.898319	0.646668	1	0.760059	1	1	1	1	1	1	1	1	1	1	1	1	0.9988	1	0.846271	1	0.961323	1	0.999866	1	1	1	1	1	1	1	1	1	1	0.920221	1	0.818769	0.707021	1.00171	1.00171	1	0.940287	0.999317	0.916283	0.18839
Node 88	1	1.0015	0.888418	1	0.110948	0.995421	1	0.511925	1	0.365906	1	1	1	1	0.863022	0.763705	0.329635	1	1	1	1	0.991015	1	1	0.86261	0.482484	0.911551	0.83422	1	0.187698	0.908797	1	1	1	1	1	1	1	0.589179	1	0.775596	0.658386	1.0015	1.0015	1	0.345383	0.994072	0.885822	1
Node 89	1	1.00107	0.782487	1	1	0.978636	0.378785	0.400843	1	1	1	0.191568	1	1	1	1	0.24844	1	1	1	1	0.959485	0.018282	0.280256	0.75767	0.177521	1	0.957164	0.0954291	1	0.955057	1	0.616568	1	1	1	1	1	0.801997	1	1	0.535604	1.00107	1.00107	1	0.828076	0.969286	1	1
Node 9	0.205204	1.00257	0.638448	1	0.182666	0.869092	0.626421	1	0.11781	1	1	1	1	0.954297	0.985392	1	0.496402	0.775011	1	1	1	0.956231	0.423614	0.748921	0.966788	0.790611	0.906686	0.98303	0.214071	1	0.883274	1	0.64579	1	0.0253445	1	1	1	0.416167	1	0.702426	0.841553	1.00257	1.00257	1	0.497352	0.845243	0.193003	1
Node 90	1	1.00043	1	1	1	0.785121	1	1	1	1	1	1	1	1	0.6605	0.337641	1	1	1	1	1	0.995348	1	1	1	0.741985	1	0.892138	1	1	1	1	1	1	1	1	1	1	1	1	1	1	1.00043	1.00043	1	1	0.996541	1	1
[truncated: 41 more columns]
