# Supplementary material for: Conservation and Evolution of Cis-Regulatory Systems in Ascomycete Fungi
Source: PLoS Biol. 2004 Nov 9;2(12):e398. doi: 10.1371/journal.pbio.0020398 (PMC526180; doi:10.1371/journal.pbio.0020398)
Supplement: Dataset S19 — (433 KB XLS). [file pbio.0020398.sd019.xls]

## Sheet: Sbay_newYCHG_500bp-probs
UID	ABF1	ACE2	ADR1	AFT1	ARO80	ASH1	AZF1	BAS1	YAP1	CAT8	CBF1	CHA4	CRZ1	CUP2	DAL80	GATA	ECM22	FKH1	FLO8	FZF1	GAL4	GAT1	GATGAG1	GATGAG2	GCN4	GCR1	GLN3	GZF3	HAC1	HAP1	HAP4	HCM1	HSF1	IME1	INO2/4	LEU3	LYS14	MAC1	MAL63	MATALPHA	MCB	MCM1	MCM1-2	MCM1-3	MET30/31	MIG1	MOT3	MSN2/4	MTsite1
Cluster_ABF1
Cluster_ACE2	0.934844	1.00562	0.737229	0.688562	0.568754	0.975458	0.92938	0.937775	0.88396	0.950622	1	0.529282	1	0.551781	0.802768	0.429848	0.76095	0.587283	1	1	0.0494191	0.982235	0.155108	0.757256	0.991715	0.183692	0.814076	0.569683	0.128136	1	0.997398	1	0.948584	1	1	1	0.0395698	0.69398	0.776782	1.00562	0.203303	0.937243	1.00562	1.00562	1	0.97486	0.956398	0.191573	0.305831
Cluster_adata-aAlpha	1	1.00258	0.99968	1	1	0.972645	1	1	0.495801	0.382097	1	0.566127	0.310395	0.652484	0.704043	0.61131	1	1	1	1	1	0.999806	1	0.806758	1	0.634266	0.840568	0.695506	1	1	0.994963	1	0.625055	1	1	1	1	1	0.999822	1.00258	0.95119	0.111999	1.00258	1.00258	1	0.997509	0.999987	0.991041	1
Cluster_adata-ARG3	0.418873	1.00432	0.881379	0.592109	0.131196	0.19244	0.997314	9.11315e-12	0.279909	0.900982	1	0.146881	1	0.440907	0.163054	0.0345336	0.667163	0.913115	1	1	0.480786	0.769745	0.662598	0.512427	5.07785e-10	0.274702	0.211435	0.147964	0.385749	0.637232	0.330206	1	0.874154	0.320432	1	1	0.218502	0.0563531	0.706017	1.00432	0.467835	0.20719	1.00432	1.00432	0.290021	0.860867	0.917155	0.929712	0.953568
Cluster_adata-CalciumSpecific	0.999716	1.01558	1	0.82495	0.900558	0.997226	0.997689	0.93823	0.931333	0.99745	0.954462	0.957134	0.0640553	0.926975	0.998748	0.917102	0.900151	0.998315	1	0.12911	0.903662	1	0.979327	0.981178	0.965108	0.994449	0.99669	0.999993	1	1	0.999761	1	0.998853	0.748173	1	1	0.585258	0.617507	1	1.01558	0.986478	0.902605	1.01558	1.01558	0.118335	0.990615	1	0.878251	0.980428
Cluster_adata-Chaperones	0.114018	1.00519	0.966938	1	0.175915	0.653811	0.0621294	1	0.854339	1	1	0.48602	0.524908	0.800763	0.713851	0.780915	1	0.531103	1	1	0.544733	0.955411	1	0.687639	0.998431	0.75528	0.574853	0.907576	0.0189224	1	0.999687	1	6.36751e-07	0.0101866	1	0.112185	1	1	0.840843	1.00519	0.814329	0.00901179	1.00519	1.00519	1	0.788318	0.966404	0.224105	1
Cluster_adata-EGT2	0.998373	1.00584	0.998302	1	1	0.561541	0.857813	0.523069	0.504018	0.338656	0.689344	0.103342	1	0.0744426	0.568121	0.0630108	0.427126	0.0809273	1	1	0.215093	0.994548	1	0.967714	0.909317	0.892934	0.97911	0.507728	0.482335	0.74588	0.818528	1	0.857153	1	1	1	1	0.338718	0.860089	1.00584	0.749265	0.0555844	1.00584	1.00584	1	0.981627	0.99779	0.823638	0.546923
Cluster_adata-ENA1	0.88149	1.00345	0.999994	1	1	0.99997	0.991204	1	0.902018	0.533577	0.499398	1	1	0.95054	0.967967	0.943927	1	0.858244	1	1	0.407925	1	1	0.30763	0.986437	0.991102	0.936034	0.996371	1	0.555514	0.999969	1	0.94794	1	1	1	1	0.517068	0.999267	1.00345	0.900475	0.939377	1.00345	1.00345	1	0.979123	1	0.932006	0.401874
Cluster_adata-ERD2	0.881844	1.00194	0.977025	1	1	0.701384	0.93007	0.616883	0.728993	0.646298	1	1	0.243185	0.732898	0.706461	0.173087	0.39009	0.666478	1	1	1	0.995714	1	0.907829	0.358164	0.761686	0.698111	0.913167	0.196715	1	0.697252	1	0.4632	1	1	1	1	1	0.663334	1.00194	0.628231	0.793083	1.00194	1.00194	1	0.988828	0.923541	0.97084	0.748329
Cluster_adata-G1DNAreplication	0.983474	1.00562	0.999741	1	1	0.975458	0.833155	1	0.88396	0.950622	1	0.252098	1	0.982325	0.667869	0.640338	0.76095	0.587283	1	1	1	0.999977	1	0.960621	0.991715	0.856512	0.814076	0.716996	0.46952	1	0.87207	1	0.265341	1	1	1	1	1	0.999976	1.00562	0.94966	0.001276	1.00562	1.00562	1	0.863362	1	0.47979	0.901739
Cluster_adata-OAC1	0.810001	1.0015	0.992039	1	1	0.9895	0.255376	0.525761	0.241541	1	1	1	0.194804	0.59005	0.511983	0.0926311	1	0.574224	1	1	1	0.998637	1	0.843367	0.517864	0.94268	0.553314	0.914645	1	1	0.920485	1	1	1	1	1	1	1	0.94843	1.0015	0.483548	1	1.0015	1.0015	1	0.275759	0.999777	1	1
Cluster_adata-Respiration	0.89168	1.00891	0.999446	1	0.735125	0.973407	0.929496	0.929671	0.823208	0.467146	0.00688927	0.295199	0.720232	0.977173	0.998529	0.97471	0.895698	0.993399	1	1	1	0.999997	0.645514	0.770367	0.993461	0.953079	0.986745	0.996729	1	0.141564	0.058925	1	0.71105	0.547841	1	1	1	0.845928	0.986179	1.00891	0.578002	0.913896	1.00891	1.00891	1	0.0210509	1	0.142698	0.853843
Cluster_adata-RET3	0.430136	1.00737	0.924912	1	0.0215824	0.601638	0.671601	0.454549	0.306008	0.515834	0.424493	0.402149	0.651984	0.918464	0.863151	0.67964	0.84635	0.765855	0.0288636	1	0.299376	0.999692	0.542657	0.924073	0.566633	0.950267	0.779967	0.933758	0.563848	1	0.325422	1	0.700679	1	1	1	1	1	0.770603	1.00737	0.0250469	0.298277	1.00737	1.00737	1	0.339524	0.998464	0.823489	0.540867
Cluster_adata-Secretion	0.0822666	1.0065	0.903703	0.739881	0.621257	0.214527	0.817417	0.959469	0.790629	1	1	0.876523	0.605809	0.557734	0.721778	0.371067	0.80833	0.256544	1	1	1	0.989945	1	0.982434	0.868038	0.914951	0.901283	0.964198	1	1	0.208328	1	0.76878	0.440145	1	1	1	0.745099	0.990356	1.0065	0.685037	0.539596	1.0065	1.0065	1	0.892574	0.981957	0.984592	0.633973
Cluster_adata-TRP4	0.642685	1.00323	0.869746	1	1	0.918284	0.0196427	3.46939e-05	0.0413744	1	1	0.647993	0.371675	0.361294	0.499079	0.45877	1	0.8398	1	1	0.0821281	0.87606	1	0.474563	6.05408e-06	0.52496	0.536195	0.81358	0.306022	1	0.801702	1	0.0926726	1	1	1	0.168736	1	0.896809	1.00323	0.680868	1	1.00323	1.00323	1	0.765858	0.99377	0.182048	0.89984
Cluster_adata-TUB	0.100858	1.00345	0.947839	0.511829	1	0.859681	0.615572	1	0.656599	0.842624	0.499398	0.671702	0.390875	0.645207	0.967967	0.766573	0.58509	0.0290731	1	1	1	0.856412	1	1	0.91938	0.792085	0.936034	0.748279	1	1	0.943182	1	0.520915	0.00314633	1	1	1	1	0.709406	1.00345	0.00316294	0.753296	1.00345	1.00345	0.239589	0.448835	0.998996	0.633237	0.914109
Cluster_ADR1	0.872058	1.00606	0.255958	0.71537	1	0.863621	0.879346	0.5484	0.166899	0.960852	0.332843	0.114534	1	0.181435	0.623418	0.957965	0.785942	0.0347874	1	1	1	0.798621	1	0.814533	0.499857	0.458584	0.24631	0.738542	0.0285833	0.75849	0.755866	1	0.179542	1	1	1	1	1	0.916867	1.00606	0.433288	0.850217	1.00606	1.00606	1	0.833508	0.566898	0.0400303	0.577143
Cluster_ARG80	0.676177	1.00453	0.860508	1	1	0.94104	0.655334	0.155674	0.14303	1	0.221813	0.416735	1	0.308344	0.710226	0.695949	0.310091	0.439491	1	1	1	0.907972	1	0.560253	0.37109	0.917597	0.630007	0.93151	1	1	0.585009	1	0.712068	1	1	1	1	0.615521	0.818158	1.00453	0.87732	0.238606	1.00453	1.00453	0.302103	0.957727	0.906909	0.997118	0.96019
Cluster_ARG81	0.497226	1.00367	0.597449	1	0.4227	0.618193	0.849303	0.00482449	0.915283	1	0.520624	0.101285	1	0.695837	0.265473	0.133572	1	0.597065	1	1	1	0.579029	1	0.931948	0.191194	0.850255	0.423234	0.48699	1	1	0.780135	1	0.807199	1	1	1	1	0.172799	0.436364	1.00367	0.542441	0.0118211	1.00367	1.00367	0.252519	0.947814	0.778906	0.998749	0.718293
Cluster_Arginine	0.193621	1.00323	0.869746	0.137841	0.0802397	0.634023	0.926965	1.90429e-07	0.329732	0.219374	1	0.00226441	1	0.800716	0.29825	0.0854715	1	0.8398	1	1	0.388176	0.87606	0.5571	0.713767	6.15519e-05	0.52496	0.310856	0.439303	0.0489933	0.167197	0.915994	1	0.937358	0.0322041	1	1	1	0.14116	0.543951	1.00323	0.435815	0.0228156	1.00323	1.00323	1	0.574292	0.960037	0.769934	0.89984
Cluster_ARO80	0.991369	1.00432	0.725113	1	0.476154	0.336588	0.112786	0.88172	0.773679	0.900982	0.579079	1	0.462021	0.260766	0.0762264	0.0345336	0.667163	0.0704417	1	1	0.480786	0.493411	0.662598	0.512427	0.524339	0.982774	0.379676	0.0622893	1	1	0.330206	1	0.67918	0.320432	1	0.0943632	1	1	0.13311	1.00432	0.680133	0.969968	1.00432	1.00432	1	0.223425	0.719808	0.486904	0.799145
Cluster_ASH1	0.430136	1.00737	0.839412	0.782779	1	0.991022	0.000563659	0.682455	0.492689	0.732939	0.770831	0.402149	1	0.918464	0.92924	0.321884	0.271967	0.984394	1	0.0638077	0.672398	0.998577	0.842745	0.551375	0.0818172	0.728718	0.995769	0.96776	1	0.234215	0.948185	1	0.848385	0.481962	1	1	0.0642169	0.787712	0.476004	1.00737	0.0099774	0.166909	1.00737	1.00737	0.441873	0.0161474	0.998464	0.181312	0.098758
Cluster_Asparagine	1	1.0015	0.999296	1	1	1	1	0.152148	0.637685	1	1	0.385419	1	0.883494	0.797902	0.716103	1	0.574224	1	1	0.204734	0.999998	1	0.510632	0.517864	0.993048	0.865779	0.984021	1	1	0.989225	1	0.725167	1	1	1	1	1	0.991615	1.0015	0.828039	1	1.0015	1.0015	1	0.96964	0.999993	0.720286	0.65795
Cluster_Autophagy	1	1.00194	0.977025	1	1	1	0.17631	1	0.347834	1	0.322211	1	1	0.439285	0.706461	0.450254	0.39009	1	1	1	1	0.456184	1	1	0.663222	0.998322	0.92443	0.511644	1	1	0.697252	1	0.810053	1	1	1	1	1	0.966647	1.00194	0.89607	0.793083	1.00194	1.00194	1	0.923612	0.61742	0.844423	0.372713
Cluster_AZF1	0.354312	1.00497	0.814498	0.266566	1	0.147458	0.370136	1	1	0.930068	1	0.798585	1	0.406984	0.660584	0.324347	0.349997	0.939832	1	1	0.52952	0.962208	1	0.817842	0.983306	0.530745	0.714592	0.27308	0.429155	1	0.847686	1	0.343205	1	1	1	0.246945	0.649057	0.570184	1.00497	0.785955	0.516762	1.00497	1.00497	1	0.26246	0.994268	0.658105	0.654071
Cluster_BAS1	0.933106	1.0041	0.756366	0.200923	0.458906	0.604324	0.353701	6.96063e-11	0.936676	0.629356	1	0.36803	1	0.00361909	0.589278	0.844717	1	0.65887	1	1	1	0.932128	1	0.956043	5.1228e-06	0.198038	0.531747	0.188868	1	0.618325	0.880136	1	0.401023	1	1	1	1	0.578797	0.749554	1.0041	0.637673	0.364002	1.0041	1.0041	0.277731	0.921935	0.926879	0.909555	0.774793
Cluster_Biotin	1	1.00086	1	1	1	1	1	1	1	1	1	1	1	1	1	1	1	1	1	1	1	0.999952	1	1	1	1	1	1	1	1	1	1	1	1	1	1	1	1	1	1.00086	1	1	1.00086	1.00086	1	1	1	1	1
Cluster_CAD1	1	1.00367	0.815953	0.0356763	1	0.784873	0.0452327	0.524329	0.689772	0.859832	0.520624	0.0236105	1	0.695837	0.265473	0.0135423	0.229299	0.874567	1	1	1	0.835823	1	1	0.191194	0.708985	0.949495	0.828197	1	1	0.61201	1	0.956736	0.279814	1	1	1	0.538584	0.659217	1.00367	0.763935	0.123103	1.00367	1.00367	1	0.947814	0.944653	0.297714	0.213641
Cluster_CBF1	0.552413	1.00497	0.628749	0.0163813	1	0.580891	0.990133	0.00597323	1	0.236866	1.07049e-17	0.197754	1	0.893941	0.660584	0.164477	0.717912	0.501458	1	1	0.168016	0.990364	0.118235	0.45248	0.00916907	0.367063	0.988324	0.935233	0.104399	0.314925	0.727149	1	0.769936	1	1	1	0.246945	0.079528	0.372929	1.00497	0.235214	0.738542	1.00497	1.00497	0.0570224	0.41533	0.970847	0.315018	0.416494
Cluster_CHA4	0.478896	1.00562	0.737229	1	1	0.775747	0.0461296	0.754864	0.268339	0.950622	1	0.836673	0.553557	0.377479	0.217964	0.429848	1	0.587283	1	1	0.573708	0.833158	0.756677	0.401007	0.253315	0.609482	0.311267	0.569683	0.46952	0.732615	0.202006	1	0.265341	1	1	1	1	1	0.979507	1.00562	0.861815	0.0159701	1.00562	1.00562	1	0.751814	0.848897	0.996779	0.901739
Cluster_CIN5	0.999395	1.0129	0.91226	0.11421	0.288138	0.672302	0.230766	0.946487	0.826456	0.786008	0.237794	0.566679	0.84065	0.890529	0.813626	0.255703	0.832011	0.919856	1	0.108389	0.57155	0.999745	0.826809	0.638277	0.657069	0.955272	0.975141	0.988676	0.763979	0.563143	0.751495	1	0.545512	1	1	1	0.51828	0.490956	0.967167	1.0129	0.686356	0.752058	1.0129	1.0129	1	0.357931	0.999962	0.11281	0.0667223
Cluster_CRZ1	0.446151	1.00345	0.947839	1	0.403705	0.528316	0.817161	0.491211	0.656599	0.842624	0.499398	1	0.390875	0.95054	0.202902	0.504039	1	0.563148	1	1	1	0.856412	1	0.530207	0.54084	0.906504	0.367009	0.748279	1	0.555514	0.856179	1	0.778629	1	1	1	1	1	0.709406	1.00345	0.272394	0.939377	1.00345	1.00345	1	0.818718	0.952654	0.932006	0.685813
Cluster_CUP9	0.991369	1.00432	0.881379	0.217207	1	0.822226	0.608254	0.136251	0.279909	0.900982	1	1	1	0.81585	0.652908	0.662601	0.667163	0.913115	1	1	1	0.995417	1	0.877364	0.323949	0.982774	0.379676	0.788434	1	1	0.187681	1	0.441876	1	1	1	0.218502	0.597576	0.851141	1.00432	0.680133	0.854623	1.00432	1.00432	0.290021	0.558011	0.996998	0.929712	0.31351
Cluster_DAL81	0.994641	1.00475	0.936476	0.0689476	1	0.805589	0.508173	0.176053	0.34463	0.212586	1	0.0558036	1	0.203287	0.427075	0.289593	1	0.93199	1	1	0.513803	0.894559	0.324813	0.605596	0.244884	0.160178	0.836288	0.185921	0.096786	0.0914979	0.800519	1	0.742292	1	1	0.103316	1	1	0.615669	1.00475	0.560383	0.271202	1.00475	1.00475	0.00571923	0.206645	0.97492	0.768799	0.382297
Cluster_DAL82	0.953915	1.00606	0.929318	0.121574	0.0575524	0.969644	0.879346	0.311978	0.166899	0.825924	0.702548	0.114534	1	0.639125	0.623418	0.0760447	1	1	1	1	1	0.582415	0.439406	0.662543	0.193415	0.964071	0.983273	0.846126	0.144597	0.405409	0.859075	1	0.718141	0.418001	1	1	1	0.355114	0.202082	1.00606	0.433288	0.850217	1.00606	1.00606	1	0.715814	0.823107	0.424759	0.365606
Cluster_DIG1	0.977632	1.00345	0.636009	1	1	0.859681	0.991204	0.491211	1	0.533577	1	1	1	0.228744	0.967967	1	0.58509	0.563148	1	1	0.407925	0.856412	1	0.985622	0.91938	0.623121	0.801479	0.87888	1	1	0.328888	1	0.94794	1	1	1	1	1	0.4888	1.00345	0.900475	0.247426	1.00345	1.00345	1	0.818718	0.798406	0.932006	0.182529
Cluster_DOT6	0.260165	1.00913	0.808351	0.84859	0.743608	0.329465	0.877577	0.988825	0.936104	0.686577	0.535671	0.946726	1	0.117656	0.73817	0.932272	1	0.726647	1	1	0.748358	0.306701	1	0.525873	0.684453	0.479759	0.346586	0.402145	0.26755	0.881705	0.138706	1	0.0396289	1	1	1	1	0.562958	0.504737	1.00913	0.930099	0.92305	1.00913	1.00913	0.158521	0.828817	0.624126	0.639435	0.731637
Cluster_DrugResistance	0.954337	1.0028	0.999932	1	1	0.936721	0.684638	1	0.540224	0.777293	0.102093	1	1	1	0.912047	0.903678	1	1	1	1	0.346694	0.999664	0.506221	0.612493	0.847503	0.959351	0.665449	0.916971	0.271332	0.482418	0.982849	1	0.669877	1	1	1	1	1	0.999539	1.0028	0.323218	0.897378	1.0028	1.0028	1	0.936082	0.999976	0.956062	0.863813
Cluster_Endocytosis	0.0427292	1.00432	0.486975	0.592109	1	0.681663	0.792213	0.614653	1	0.374364	1	0.146881	0.122571	0.929799	0.91365	0.97276	0.667163	1	1	1	0.480786	0.995417	1	0.877364	0.524339	0.88357	0.773128	0.984072	1	1	0.817653	1	0.975176	0.320432	1	1	1	0.597576	0.508835	1.00432	0.8547	0.969968	1.00432	1.00432	1	0.223425	0.981981	0.167418	0.31351
Cluster_FattyAcid	0.46544	1.00759	0.675814	0.0646584	0.0237823	0.864226	0.828957	0.701661	0.714261	0.17517	0.43916	0.692073	1	0.307298	0.0115863	0.0503531	0.286772	0.206894	1	1	0.311385	0.933316	0.851104	0.428594	0.602905	0.780119	0.138867	0.491838	0.0506442	0.247595	0.768511	1	0.949449	0.143245	1	0.159481	0.0675878	0.464877	0.739822	1.00759	0.0319833	0.93608	1.00759	1.00759	0.117948	0.0240107	0.991451	0.471252	0.568032
Cluster_FHL1	0.997358	1.02056	0.999998	0.111218	0.801447	0.1029	0.997949	0.965586	0.00099303	0.130506	0.982688	0.0921689	0.945303	0.997233	0.957764	0.990959	0.994242	0.921975	0.0774622	1	0.35089	1	0.876776	0.939678	0.946736	0.885403	0.651762	0.992184	1	0.845773	0.84224	0.0394016	0.931175	1	1	1	0.685127	0.789748	0.999938	1.02056	0.60755	0.90062	1.02056	1.02056	1	0.740321	1	0.998457	0.964032
Cluster_FKH1	0.195843	1.0041	0.522696	0.573364	0.458906	0.883486	0.755421	0.868366	0.936676	1	1	1	1	0.591362	0.887228	0.383002	1	0.0580895	1	1	1	0.932128	0.265085	0.676876	0.958438	0.528001	0.96875	0.972499	1	1	0.129473	1	0.643584	1	1	1	1	1	0.55813	1.0041	0.828515	1	1.0041	1.0041	1	0.921935	0.739543	0.424088	0.774793
Cluster_FKH2	0.599653	1.00847	0.574764	0.514571	1	0.179173	0.174475	0.769659	0.791399	0.0554766	0.815645	0.264539	1	0.323623	0.240538	0.792755	0.624857	2.1845e-06	1	1	1	0.898289	0.88034	0.716959	0.730584	0.117354	0.0835018	0.191904	0.614151	0.302047	0.508141	1	0.492417	0.529914	1	1	1	0.522524	0.30812	1.00847	0.663266	0.0382636	1.00847	1.00847	0.48793	0.722373	0.856797	0.647882	0.313381
Cluster_Flavin	0.694545	1.00107	0.487333	0.200541	0.149027	0.459012	0.771721	0.413021	0.13762	1	1	0.293652	1	1	0.900384	0.593096	1	0.456512	1	1	0.150911	0.994925	1	0.0858336	0.0885193	0.971217	0.761675	0.991184	1	1	0.960643	1	1	0.091915	1	1	1	1	0.680028	1.00107	1	1	1.00107	1.00107	1	0.917542	0.765081	0.85954	0.150157
Cluster_Flocculation	1	1.00107	0.999958	1	1	1	1	0.413021	1	1	1	1	0.143354	1	1	1	1	1	1	1	1	0.999996	0.237514	0.733892	0.738694	0.971217	1	1	1	1	0.960643	1	1	1	1	1	1	1	0.999394	1.00107	0.715546	0.583069	1.00107	1.00107	1	1	1	1	0.535181
Cluster_FZF1	0.989048	1.0041	0.900645	0.573364	0.458906	0.883486	0.0862228	0.868366	0.248274	0.343176	0.190444	0.36803	0.0187473	0.780983	0.761444	0.844717	1	1	1	1	0.463452	0.79236	0.643722	0.46258	0.687053	0.528001	0.531747	0.841319	0.370566	0.618325	0.129473	1	0.854657	1	1	1	0.208789	1	0.952775	1.0041	0.828515	0.608324	1.0041	1.0041	1	0.669101	0.739543	0.127127	0.774793
Cluster_GAL4	0.828692	1.00302	0.993504	1	1	0.880819	0.907285	0.775363	0.581858	0.460932	0.454099	1	0.351874	0.758431	0.82171	0.697091	1	0.016164	1	1	0.000801181	0.999453	1	0.665926	0.876284	0.418584	0.717089	0.951834	0.288887	1	0.989679	1	0.924628	1	1	1	0.158415	0.125864	0.923991	1.00302	1	0.0597621	1.00302	1.00302	1	0.990757	0.999499	0.715952	0.883206
Cluster_Galactose	0.453596	1.0015	0.761403	1	1	0.192076	0.873635	1	1	1	0.260977	1	0.194804	0.883494	0.797902	1	1	0.187295	1	1	3.34301e-05	0.889817	1	0.510632	0.847311	0.517368	0.553314	0.732345	1	1	0.920485	1	1	1	1	1	0.00296555	1	0.502274	1.0015	1	0.312699	1.0015	1.0015	1	0.275759	0.952239	0.159888	1
Cluster_GAT1	0.139562	1.00628	0.917079	1	0.608759	0.693582	0.960912	0.572925	0.77068	0.20276	0.121743	0.0414089	0.593345	0.818207	0.374982	0.188221	0.797444	1	1	1	0.0648142	0.991712	0.7934	0.931551	0.847094	0.885805	0.610082	0.89085	0.0313372	0.422857	0.397592	1	0.888767	1	1	1	0.300813	1	0.667403	1.00628	0.307089	0.317125	1.00628	1.00628	1	0.0106902	0.938587	0.111209	0.0439307
Cluster_GAT3	1	1.00215	0.999938	1	1	0.928382	1	1	0.142058	1	0.350907	1	1	0.953686	0.77848	0.834604	1	0.704826	1	1	1	0.999997	1	0.929302	1	0.990638	0.47223	0.953507	1	1	0.998459	1	0.842099	1	1	1	1	1	0.998068	1.00215	1	0.826347	1.00215	1.00215	1	0.993224	0.999997	1	0.784135
Cluster_GCN4	0.164117	1.0065	0.415574	0.739881	0.246315	0.214527	0.817417	9.66488e-14	0.380767	0.41623	0.131286	0.608133	0.605809	0.143177	0.0986166	0.106594	1	0.685935	1	1	1	0.762193	0.804369	0.730746	1.04053e-09	0.842086	0.0490623	0.0559613	0.161469	0.440039	0.846554	1	0.76878	1	1	1	1	0.00172864	0.773022	1.0065	0.344037	0.194932	1.0065	1.0065	0.402103	0.892574	0.796212	0.984592	0.940278
Cluster_GCR1	0.59286	1.00302	0.422788	0.0210231	0.363832	0.00402272	0.498725	0.775363	0.868944	0.460932	0.454099	0.622577	0.351874	0.758431	0.227727	0.697091	0.536784	0.489362	1	1	0.072668	0.671593	0.532349	0.416569	0.876284	0.0995303	0.256025	0.309593	1	1	0.533639	1	0.00429983	1	1	1	1	1	0.80435	1.00302	0.379795	0.913889	1.00302	1.00302	1	0.136835	0.836667	0.715952	0.319213
Cluster_GCR2	0.676177	1.00453	0.693255	0.233602	0.14212	0.867339	0.276445	1	0.952672	0.684261	1	0.768395	1	0.165612	0.538274	0.882742	0.685017	0.214925	1	1	0.497564	0.466748	1	0.359385	1	0.015782	0.127641	0.114632	0.40057	0.655207	0.255505	0.0697962	0.271976	1	1	1	0.228099	0.615521	0.818158	1.00453	0.515033	0.678286	1.00453	1.00453	1	0.987107	0.700113	0.547527	0.347882
Cluster_GeneralTFs	0.430136	1.00737	0.988968	1	1	0.828725	0.80428	0.97361	0.692015	1	1	0.402149	1	0.40909	0.76609	0.67964	0.84635	0.558766	1	1	1	0.940777	1	0.551375	0.929167	0.132878	0.779967	0.876866	1	1	0.948185	0.110686	0.848385	1	1	1	1	0.787712	0.933975	1.00737	0.113906	0.980692	1.00737	1.00737	1	0.842782	0.998464	0.957204	0.88044
Cluster_GLN3	0.763754	1.00628	0.443632	0.7279	1	0.270907	0.0970167	0.806849	0.918088	0.390491	1	0.5894	0.593345	0.215139	0.525787	0.0905767	0.797444	0.430276	1	1	0.613771	0.780611	0.457509	0.526882	0.847094	0.885805	0.883672	0.390286	1	0.770477	0.263973	1	0.20459	1	1	1	0.300813	1	0.952958	1.00628	0.913408	0.959401	1.00628	1.00628	0.391731	0.477839	0.938587	0.878758	0.988389
Cluster_Glutamate	0.694545	1.00107	0.86425	0.200541	1	0.961364	0.379181	0.413021	0.515678	0.0108682	1	0.293652	1	0.397268	0.265894	0.192047	1	0.456512	1	1	1	0.941376	1	0.330337	0.336205	0.514885	0.365603	0.35708	1	0.0219525	0.781455	1	1	1	1	0.0244357	1	1	0.680028	1.00107	1	0.184265	1.00107	1.00107	1	0.304911	0.97563	0.521675	0.535181
Cluster_Glutathione	0.810001	1.0015	0.944887	1	1	0.452201	0.873635	0.525761	0.0562539	1	0.260977	0.385419	1	0.883494	0.232816	0.0167619	1	1	1	1	1	0.984353	1	1	0.213589	0.94268	0.553314	0.732345	1	1	0.448001	1	1	1	1	1	1	1	0.991615	1.0015	0.828039	0.312699	1.0015	1.0015	1	0.275759	0.995813	0.935988	1
Cluster_Glycerol	0.810001	1.0015	0.761403	1	1	0.192076	0.0141746	1	0.637685	0.172253	0.260977	1	1	1	0.797902	0.716103	1	0.187295	1	1	1	0.984353	1	0.510632	0.213589	0.517368	0.865779	0.984021	1	1	0.732714	1	0.335034	0.126296	1	1	1	1	0.94843	1.0015	0.483548	1	1.0015	1.0015	0.112825	0.275759	0.952239	0.159888	0.0640993
Cluster_Glycogen	1	1.00172	0.92037	1	1	0.954305	0.121646	1	0.294984	0.60296	1	0.0961502	1	1	0.857993	0.76288	1	0.623158	1	1	1	0.997452	1	0.879842	0.883294	0.654066	0.899284	0.620811	1	0.333064	0.822182	1	1	1	1	1	1	1	0.733481	1.00172	1	0.123232	1.00172	1.00172	1	0.389069	0.993557	0.0790541	0.706594
Cluster_GTS1	0.953915	1.00606	0.837547	0.348454	1	0.481905	0.999751	0.311978	0.907922	0.825924	1	0.570011	1	0.898251	0.623418	0.699662	1	0.638963	1	1	0.60085	0.974756	0.439406	0.662543	0.499857	0.458584	0.24631	0.846126	1	0.75849	0.205416	1	0.0849382	1	1	1	1	1	0.833194	1.00606	0.898506	0.679323	1.00606	1.00606	1	0.963165	0.944894	0.584859	0.781348
Cluster_HAL9	0.962917	1.00475	0.979346	0.627176	1	0.501915	0.177243	0.904507	0.34463	0.435668	1	0.784015	0.494434	0.545144	0.427075	0.139892	0.701916	0.470885	1	1	0.513803	0.992352	0.697415	0.605596	0.796954	0.873697	0.480022	0.498542	1	0.672294	0.899458	1	0.307295	1	1	1	0.237579	0.255398	0.894635	1.00475	0.896757	0.271202	1.00475	1.00475	0.313983	0.206645	0.999917	0.958318	0.840939
Cluster_HAP2	0.95478	1.00453	0.948168	1	1	0.261316	0.4576	0.893721	0.0165413	0.911818	0.221813	0.768395	1	0.687633	0.999186	0.977261	0.685017	0.923129	1	1	0.497564	0.746707	1	0.897741	0.902759	0.3586	0.980829	0.567279	1	0.655207	0.136813	1	0.481853	0.333461	1	1	1	0.615521	0.461233	1.00453	0.165875	0.441934	1.00453	1.00453	1	0.448884	0.906909	0.86169	0.590248
Cluster_HAP3	0.934844	1.00562	0.875701	0.688562	0.568754	0.0542116	0.687319	0.937775	0.0515028	0.79267	0.675557	0.529282	0.553557	0.0573303	0.667869	0.429848	1	0.958344	1	1	0.203185	0.628977	1	0.960621	0.963199	0.454578	0.660206	0.569683	1	1	0.109636	1	0.451206	1	1	1	1	0.69398	0.979507	1.00562	0.94966	0.937243	1.00562	1.00562	1	0.863362	0.848897	0.47979	0.901739
Cluster_HAP4	0.70314	1.00584	0.857212	1	0.582521	0.269226	0.724659	0.773408	0.896585	0.809944	0.00483461	0.54997	1	0.757183	0.997216	0.951165	0.77379	0.833358	1	1	1	0.978717	0.769588	0.44366	0.969934	0.680254	0.995746	0.942308	0.482335	0.387713	0.00471695	1	0.0276401	0.406607	1	1	1	1	0.933537	1.00584	0.749265	0.94567	1.00584	1.00584	1	0.0633176	0.99779	0.691883	0.91312
Cluster_HAP5	0.953915	1.00606	0.837547	1	1	0.931042	0.997332	0.5484	0.073204	0.960852	0.332843	0.570011	1	0.469293	0.992185	0.957965	0.445675	0.638963	1	1	0.60085	0.582415	0.781817	0.662543	0.330282	0.742918	0.863436	0.738542	1	0.75849	0.205416	1	0.179542	1	1	1	0.292105	0.355114	0.985943	1.00606	0.613943	0.953013	1.00606	1.00606	1	0.915202	0.823107	0.973978	0.781348
Cluster_Heme	1	1.00172	0.708414	0.301087	1	0.58799	0.647127	1	0.686642	1	1	0.426743	1	0.66765	0.335907	0.76288	1	0.623158	1	1	1	0.860924	1	0.588044	0.595431	0.0386448	0.319519	0.620811	1	1	0.312404	1	0.771514	1	1	1	1	1	0.126485	1.00172	0.86631	0.123232	1.00172	1.00172	1	0.669442	0.651434	0.0790541	0.706594
Cluster_HIR1	1	1.00345	0.947839	1	1	0.859681	0.0878227	1	0.656599	0.842624	1	0.671702	0.390875	0.228744	0.372411	0.504039	1	1	1	1	0.407925	0.961199	0.0488196	0.145891	0.91938	0.906504	0.592591	0.565329	1	0.555514	0.996362	1	0.778629	1	1	1	1	1	0.865293	1.00345	0.900475	0.485982	1.00345	1.00345	1	0.818718	0.992027	1	0.914109
Cluster_HIR2	0.971623	1.00323	0.869746	1	1	0.999158	0.559254	0.798127	0.886679	0.823309	1	1	1	0.589291	0.864232	0.733756	0.561599	0.527229	1	1	0.388176	0.968912	1	0.713767	0.484972	0.718163	0.762312	0.920278	1	1	0.915994	1	0.746414	1	1	1	1	1	0.964764	1.00323	0.435815	0.441253	1.00323	1.00323	1	0.574292	0.99377	0.567502	0.360747
Cluster_Histidine	0.22781	1.00172	0.708414	1	1	0.58799	0.647127	0.000445615	1	1	1	1	1	0.35725	0.857993	0.388661	0.355614	1	1	1	1	0.860924	0.0629016	0.588044	0.0210005	0.654066	1	0.843879	0.176907	1	0.583599	1	0.137915	1	1	1	1	1	0.733481	1.00172	0.560143	1	1.00172	1.00172	1	0.886046	0.993557	0.956794	1
Cluster_HMS1	1	1.00345	0.947839	0.511829	0.403705	0.71624	0.817161	1	0.656599	0.533577	1	1	1	0.992697	0.763726	0.766573	1	0.563148	1	1	1	0.961199	0.580546	0.530207	0.986437	0.906504	0.367009	0.748279	1	0.555514	0.522055	0.0536051	0.520915	1	1	1	0.178932	0.517068	0.865293	1.00345	0.724848	0.753296	1.00345	1.00345	1	0.649566	0.992027	0.983821	0.914109
Cluster_HSF1	0.396118	1.00519	0.358572	0.659242	1	0.336807	0.254182	0.922912	0.854339	0.0396232	0.00282137	0.0730527	0.524908	0.157871	0.387579	0.573845	1	0.293943	1	1	0.000835563	0.122887	0.363973	0.497987	0.851231	0.0136347	0.389123	0.370525	0.00231399	0.0281606	0.487062	1	6.36751e-07	0.371085	1	0.112185	0.256198	0.664717	0.0162256	1.00519	0.449253	0.0285141	1.00519	1.00519	1	0.191542	0.275818	0.224105	0.450244
Cluster_IME4	0.676177	1.00453	0.693255	0.233602	0.0274191	0.867339	0.276445	0.893721	0.796891	0.405248	0.596942	0.0481062	1	0.687633	0.710226	0.882742	1	0.923129	1	1	0.497564	0.746707	0.680479	0.560253	0.76432	0.3586	0.630007	0.853168	0.0130981	0.277747	0.86348	1	0.891216	0.333461	1	1	0.228099	0.615521	0.66116	1.00453	0.87732	0.678286	1.00453	1.00453	0.302103	0.284219	0.906909	0.106892	0.821134
Cluster_INO2	0.632482	1.0054	0.1332	0.0937164	0.18745	0.719037	0.0343112	0.735027	0.441678	0.0146202	0.285395	0.233704	0.539454	0.977593	0.613106	0.218465	0.389097	0.79941	1	1	0.559457	0.849559	1	0.724022	0.873411	0.0626335	0.784486	0.938841	0.45639	0.122931	0.0117659	1	0.817941	1	1	0.116588	1	0.0969174	0.145817	1.0054	0.492564	0.201556	1.0054	1.0054	0.348437	0.0106267	0.261367	0.15335	0.276476
Cluster_INO4	0.289579	1.0065	0.415574	0.380449	0.246315	0.47614	0.119346	0.359803	0.927192	0.650011	0.0077019	0.327134	0.605809	0.929147	0.430676	0.751605	0.48174	0.874614	1	1	0.626275	0.762193	0.804369	0.566682	0.742377	0.115696	0.32251	0.75807	0.51897	0.781872	0.0275145	1	0.76878	0.440145	1	0.13829	1	0.146142	0.153827	1.0065	0.512827	0.0950674	1.0065	1.0065	1	0.257524	0.531242	0.241594	0.246133
Cluster_InvasiveGrowth	0.656958	1.00215	0.237297	0.361022	1	0.790139	0.237372	0.655664	0.399277	0.684914	1	1	0.266281	0.258183	0.292281	0.218656	1	0.321344	1	1	0.279177	0.418046	1	0.714572	0.190654	0.0602949	0.754582	0.186339	1	0.397361	0.319747	1	0.071772	1	1	1	0.115859	0.365313	0.593652	1.00215	0.91921	0.826347	1.00215	1.00215	1	0.154121	0.585176	0.680107	0.159275
Cluster_Isoleucine	1	1.0015	0.761403	1	1	0.921995	0.569249	0.000182227	0.241541	0.172253	1	0.385419	1	0.59005	0.960438	0.716103	1	1	1	1	1	0.984353	1	0.510632	0.00975498	0.94268	1	0.914645	1	0.0431837	0.732714	1	0.335034	1	1	0.000481712	1	1	0.163825	1.0015	0.828039	1	1.0015	1.0015	1	0.564302	0.952239	0.409082	0.65795
Cluster_IXR1	0.235785	1.00345	0.947839	1	0.403705	0.983584	0.3903	1	0.902018	0.842624	1	0.671702	1	0.645207	0.993578	0.943927	1	0.858244	1	1	1	0.998738	0.580546	0.915634	1	0.906504	0.936034	0.985108	1	1	0.856179	1	0.94794	1	1	1	1	0.517068	0.949336	1.00345	0.724848	0.939377	1.00345	1.00345	1	0.927504	0.999903	0.633237	0.914109
Cluster_LEU3	0.989048	1.0041	0.522696	0.200923	0.458906	0.604324	0.190301	0.00888081	0.248274	0.888817	0.560428	0.36803	1	0.591362	0.237311	0.383002	0.648302	0.9018	1	1	1	0.79236	0.643722	0.130183	0.0193977	0.927056	0.172393	0.529386	0.370566	1	0.416505	1	0.0854038	1	1	0.00378373	1	1	0.881011	1.0041	0.107485	0.608324	1.0041	1.0041	1	0.308614	0.739543	0.994212	0.519307
Cluster_Leucine	1	1.00107	0.487333	1	0.149027	0.961364	0.771721	0.0828724	0.515678	1	1	0.293652	1	0.397268	0.608254	0.593096	0.240101	1	1	1	1	0.941376	0.237514	0.330337	0.336205	0.0337399	0.365603	0.921638	0.114532	1	0.781455	1	0.602416	1	1	0.0244357	1	1	0.274776	1.00107	0.715546	1	1.00107	1.00107	1	0.0814762	0.765081	1	0.535181
Cluster_Lysine	0.881844	1.00194	0.977025	1	0.0311281	0.886909	0.713373	0.0541867	1	1	0.322211	0.465297	1	0.732898	0.984296	1	1	1	1	1	1	0.999625	1	0.655946	0.358164	0.917928	0.92443	0.999801	1	1	0.997052	1	1	1	1	1	0.00500449	1	0.966647	1.00194	0.321833	1	1.00194	1.00194	0.142685	0.923612	0.999263	1	1
Cluster_MAC1	0.59249	1.0041	0.256055	0.573364	0.458906	0.883486	0.0862228	0.868366	0.248274	0.629356	1	0.733697	1	0.780983	0.401891	0.026036	0.269716	1	1	0.0361177	0.123185	0.79236	0.265085	0.267765	0.687053	0.528001	0.887772	0.529386	1	0.240455	0.597729	1	0.401023	1	1	1	1	0.0494666	0.749554	1.0041	0.637673	0.0703971	1.0041	1.0041	1	0.168404	0.926879	0.617621	0.774793
Cluster_MAL13	0.999694	1.00737	0.988968	0.442294	0.667406	0.977565	0.36455	0.454549	0.954893	0.309797	0.424493	0.402149	0.277519	0.918464	0.863151	0.834379	0.271967	0.765855	1	1	0.672398	0.998577	1	0.972068	0.566633	0.903095	0.885192	0.994438	0.563848	0.234215	0.898925	1	0.520806	0.481962	1	1	1	0.787712	0.770603	1.00737	0.113906	0.298277	1.00737	1.00737	0.441873	0.842782	0.999995	0.0531495	0.199056
Cluster_MAL33	0.872058	1.00606	0.682224	0.00658946	0.595852	0.863621	0.999751	0.311978	0.907922	0.602205	0.332843	0.570011	0.58049	0.789381	0.975594	0.993585	1	0.967405	1	1	1	0.99324	0.781817	0.814533	0.330282	0.964071	0.863436	0.999533	0.494844	0.75849	0.47366	1	0.718141	0.0989645	1	1	0.292105	0.720701	0.53933	1.00606	0.613943	0.149631	1.00606	1.00606	1	0.165439	0.944894	0.0164809	0.19761
Cluster_Maltose	1	1.00086	1	1	1	1	1	1	1	1	1	1	1	1	1	1	1	1	1	1	1	1	1	1	1	1	1	1	1	1	1	1	1	1	1	1	1	1	1	1.00086	1	1	1.00086	1.00086	1	1	1	1	1
Cluster_ManualAFT1targets	1	1.00367	0.999999	0.000614206	0.0997818	0.963437	1	1	1	0.859832	1	0.69382	0.409492	0.994633	1	1	0.607326	1	1	1	1	1	0.225192	0.582773	0.98964	0.99477	1	0.999963	1	0.577518	0.897658	1	0.956736	1	1	1	1	0.538584	0.999964	1.00367	0.986167	0.783214	1.00367	1.00367	0.252519	0.947814	1	0.948858	0.44221
Cluster_ManualG1genes	0.614209	1.01513	0.999984	1	0.375861	0.450142	0.616816	0.976045	0.96561	0.637929	0.79661	0.497777	0.351369	0.677267	0.896251	0.719818	0.890939	0.0913122	1	0.125687	0.897046	0.999998	0.976921	0.438254	0.999657	0.998928	0.909527	0.991443	1	0.66988	0.939308	1	0.501256	0.144104	1	0.290911	1	1	0.996528	1.01513	6.21878e-13	0.308475	1.01513	1.01513	1	0.813821	1	0.966108	0.877716
Cluster_ManualHAP1targets	0.523257	1.01112	0.997972	0.182513	0.0772427	0.952234	0.791292	1	0.994654	0.0191405	0.167337	0.866532	0.795301	0.730954	0.986252	0.998895	0.134208	0.942988	1	1	0.813078	0.99924	0.937966	0.870604	0.99672	0.545594	0.759985	0.948496	1	0.0117498	0.783473	1	0.137562	1	1	1	1	0.902616	0.835068	1.01112	0.830943	0.929357	1.01112	1.01112	0.213708	0.158531	0.999999	0.819859	0.75094
Cluster_ManualMethionine	0.998373	1.00584	0.857212	0.332248	0.582521	0.906963	0.234583	0.130086	0.295956	0.576747	1.60681e-14	0.54997	0.567232	0.423536	0.838568	0.464491	0.77379	0.833358	1	1	1	0.978717	1	0.967714	0.00127134	0.892934	0.932846	0.975033	0.482335	0.387713	0.55352	1	0.689927	1	1	1	1	0.115696	0.398693	1.00584	0.881389	0.991229	1.00584	1.00584	8.12255e-09	0.510721	0.950832	0.989651	0.335607
Cluster_ManualM-G1genes	0.94208	1.00258	0.985111	0.41584	1	0.903732	0.971228	0.721867	0.824729	0.749978	0.404724	0.566127	0.0497856	0.3957	0.996076	1	1	0.768821	1	1	1	0.999985	1	0.958414	0.562742	0.408731	0.968092	0.997859	1	0.455485	0.901416	1	0.00825917	1	1	1	1	0.0966565	0.96459	1.00258	0.0317106	0.877706	1.00258	1.00258	1	0.541229	0.999784	0.991041	0.841206
Cluster_ManualYap1Targets	0.996967	1.0158	1	0.387374	0.401915	0.999622	0.99492	0.981311	0.0277129	0.533116	0.59299	0.536287	0.376551	0.828514	0.999033	0.530183	0.541786	0.998492	1	1	0.680181	1	1	0.999949	0.896157	0.999855	0.999985	0.999999	0.52036	0.877964	0.999833	1	0.935536	0.753055	1	1	1	0.837045	1	1.0158	0.904287	0.620934	1.0158	1.0158	0.71064	0.878118	1	0.893187	0.447023
Cluster_ManualZAP1targets	0.79276	1.00891	0.999854	0.266194	0.735125	0.74483	0.485938	0.229028	0.823208	0.467146	0.249415	0.295199	0.720232	0.997958	0.883281	0.923866	0.6522	0.708592	1	1	0.38224	0.999984	0.892738	0.770367	0.654139	0.976933	0.727029	0.996729	0.632622	0.608215	0.971849	1	0.71105	1	1	1	1	0.845928	0.997926	1.00891	0.989258	0.810242	1.00891	1.00891	1	0.932751	1	0.723002	0.711346
Cluster_ManualZAP1targets-2	0.885756	1.01874	0.996755	0.077108	0.758815	0.424764	0.515421	0.236018	0.95238	0.914101	0.486858	0.684787	0.929604	0.962012	0.397802	0.659681	0.840967	0.517693	1	1	0.519396	0.999833	0.944345	0.987635	0.255437	0.971458	0.274705	0.970548	0.146697	0.928397	0.862409	1	0.354011	1	1	1	1	0.979687	0.980489	1.01874	0.990081	0.731572	1.01874	1.01874	1	0.739398	0.999999	0.125999	0.556856
Cluster_MATa1	0.851566	1.00453	0.999849	0.610035	0.492856	0.591992	0.82442	0.893721	0.312115	1	1	0.416735	1	0.687633	0.36196	0.882742	0.685017	0.923129	1	1	1	0.746707	0.304991	0.359385	0.76432	0.529405	0.127641	0.567279	0.40057	1	0.938931	1	0.481853	1	1	1	1	0.615521	0.917106	1.00453	0.994961	0.974808	1.00453	1.00453	0.302103	0.957727	0.906909	0.984447	0.96019
Cluster_Mating	0.830319	1.00562	0.983167	0.315932	1	0.975458	0.977909	0.937775	0.977159	0.79267	1	0.836673	1	0.551781	0.802768	0.640338	0.76095	0.958344	1	1	1	0.939763	0.756677	0.584438	0.892675	0.748743	0.814076	0.833828	0.0234814	1	0.938109	1	0.451206	1	1	1	1	0.106142	0.979507	1.00562	0.998576	0.00485751	1.00562	1.00562	1	0.863362	0.990137	0.47979	0.735853
Cluster_MBP1	0.500262	1.00781	0.461643	0.801509	1	0.593193	0.851112	0.71997	0.994693	1	0.453623	0.438836	0.0953159	0.344935	0.833674	0.555982	0.580786	0.00167401	1	1	1	0.973232	0.574034	0.465607	0.982442	0.724835	0.965604	0.806852	0.213837	1	0.324231	1	0.0682982	0.149876	1	1	0.358886	0.80628	0.903172	1.00781	2.74544e-06	0.0080066	1.00781	1.00781	1	0.709573	0.99782	0.00894414	0.594346
Cluster_MCM1	0.852436	1.00584	0.70996	0.702266	1	0.705834	0.55663	0.523069	0.980258	0.338656	1	0.270693	1	0.423536	0.410288	0.845287	0.77379	0.613704	1	1	1	0.93091	1	0.624661	0.637568	0.140965	0.210744	0.6598	0.13631	0.387713	0.15357	1	0.0276401	1	1	1	1	0.338718	0.580775	1.00584	0.392733	4.59316e-09	1.00584	1.00584	1	0.22527	0.836155	0.0282556	0.546923
Cluster_MET31	1	1.00367	0.597449	0.533264	1	0.989782	0.252053	0.524329	0.187847	0.280638	0.000522895	1	1	0.480661	0.265473	0.0473674	0.229299	0.597065	1	1	1	0.579029	1	0.988977	0.00808048	0.338156	0.423234	0.0560647	1	0.203446	0.247138	1	0.564348	0.0407002	1	1	0.189005	0.538584	0.930252	1.00367	0.542441	0.783214	1.00367	1.00367	0.000153759	0.336193	0.944653	0.853365	0.718293
Cluster_MET4	0.991369	1.00432	0.881379	0.592109	1	0.990092	0.405841	0.0116289	0.0124397	0.900982	7.18133e-07	0.392602	0.122571	0.81585	0.471106	0.423098	0.667163	0.913115	1	1	1	0.999206	1	0.877364	0.00230706	0.771093	0.773128	0.894204	0.082081	0.637232	0.502804	1	0.67918	1	1	0.0943632	1	1	0.706017	1.00432	0.467835	0.644522	1.00432	1.00432	0.000301132	0.223425	0.996998	0.828928	0.31351
Cluster_MIG1	0.437791	1.0054	0.986847	1	1	0.719037	0.165304	0.93074	0.675129	0.522887	1	0.82485	0.539454	0.830368	0.449064	0.607955	0.747385	0.952911	1	0.0472799	0.559457	0.652537	1	0.988677	0.734784	0.684469	0.618886	0.313703	1	0.71866	0.96317	1	0.940122	0.383153	1	1	0.265339	1	0.985206	1.0054	0.939524	0.927587	1.0054	1.0054	1	0.988737	0.861301	0.981693	0.888978
Cluster_Mitochondria	0.0381078	1.00979	0.999998	1	0.767472	0.726503	0.963368	0.847437	0.874834	0.882671	0.573429	0.815627	1	0.789048	0.995761	0.952688	1	0.972178	1	1	0.772086	0.999998	0.695626	0.925782	0.765089	0.972058	0.905062	0.99879	0.666976	0.659128	0.982105	1	0.793286	1	1	1	0.426633	0.871743	0.993087	1.00979	0.983005	0.598904	1.00979	1.00979	0.538266	0.946221	1	0.999995	0.303322
Cluster_MitochondrialRPs	0.000788537	1.01178	0.707656	0.911994	1	0.959134	0.651102	0.97806	0.945786	0.715764	0.401119	0.886842	0.493737	0.462109	0.545493	0.956306	0.792877	0.758697	1	1	0.0945132	0.840071	0.548782	0.955485	0.959662	0.200367	0.36244	0.56228	0.374065	0.935951	0.876213	1	0.570582	1	1	0.235553	1	0.915154	0.538912	1.01178	0.996543	0.785929	1.01178	1.01178	1	0.908069	0.690167	0.992924	0.798896
Cluster_MOT3	0.954337	1.0028	0.915565	1	0.0620984	0.829506	0.684638	0.750039	0.540224	1	1	1	1	0.895393	0.912047	1	1	0.449645	1	1	0.346694	0.911989	0.147659	0.35721	0.621615	0.878983	0.665449	0.797177	1	1	0.982849	1	1	1	1	1	1	1	0.847079	1.0028	0.577844	0.897378	1.0028	1.0028	1	0.81804	0.996456	0.956062	1
Cluster_mRNAprocessing	0.65421	1.02676	0.999974	0.903104	0.900222	0.702301	0.907303	0.929224	0.762184	0.435622	0.578217	0.997891	0.886664	0.905839	0.934608	0.945583	0.777231	0.632051	1	1	0.904398	0.99011	0.61413	0.695703	0.975183	0.843429	0.692298	0.709474	0.555204	0.941218	0.998261	0.0623323	0.956652	1	1.00001	1	0.775867	0.283313	0.999994	1.02676	0.99996	0.990438	1.02676	1.02676	0.874789	0.999386	0.999961	0.996943	0.888739
Cluster_MSS11	0.372424	1.0041	0.522696	0.200923	1	0.766001	0.557651	0.868366	0.248274	0.343176	0.560428	0.733697	1	0.591362	0.401891	0.844717	1	0.9018	1	1	1	0.932128	1	0.676876	0.0563794	0.528001	0.172393	0.705057	1	0.240455	0.251817	1	0.854657	1	1	1	1	1	0.952775	1.0041	0.828515	0.608324	1.0041	1.0041	1	0.669101	0.926879	0.251425	0.12082
Cluster_MTH1	0.325955	1.00388	0.0749004	0.553762	0.110001	0.976057	0.151956	0.271248	0.720261	0.1245	0.037961	0.34308	0.427544	0.332757	0.943603	0.821766	0.628376	0.889014	1	1	0.445543	0.814428	1	0.224318	0.233216	0.894459	0.960226	0.886792	0.068159	0.598438	0.511886	1	0.359663	1	1	1	0.198957	1	0.00948645	1.00388	0.192759	0.324689	1.00388	1.00388	1	0.242199	0.380842	0.000623449	0.246069
Cluster_NDD1	0.89168	1.00891	0.825861	0.541714	1	0.946435	0.139686	0.987557	0.823208	0.285451	0.249415	0.295199	1	0.977173	0.577476	0.923866	0.6522	0.0392821	1	1	1	0.877768	0.892738	0.97643	0.782774	0.124262	0.313038	0.218956	0.258565	0.608215	0.50199	1	0.384933	0.18386	1	1	1	0.549755	0.880182	1.00891	0.428428	0.00335904	1.00891	1.00891	0.505283	0.797299	0.940098	0.338843	0.711346
Cluster_NRG1	0.996673	1.00519	0.999892	0.659242	0.539853	0.999959	0.024797	0.922912	0.969428	0.937726	1	0.48602	0.524908	0.800763	0.97264	0.923907	1	0.946771	1	1	0.544733	1	0.728652	0.941838	0.986765	0.864714	0.884017	0.994726	0.11217	1	0.993663	1	0.795109	1	1	1	0.256198	1	0.996898	1.00519	0.644086	0.552379	1.00519	1.00519	1	0.788318	1	0.369566	0.450244
Cluster_NuclearProteinTargetting	0.0106673	1.0109	0.877083	1	0.475021	0.432198	0.11473	0.57921	0.225503	0.648843	0.63131	0.859052	0.453408	0.227075	0.930859	0.931774	0.756004	0.519484	1	1	0.482115	0.947159	0.0461221	0.505019	0.274188	0.918356	0.83472	0.729754	0.705472	1	0.534171	0.1587	0.471165	1	1	1	1	0.658528	0.977212	1.0109	0.570798	0.970019	1.0109	1.0109	1	0.886946	0.883023	0.927692	0.995759
Cluster_PDR1	0.795002	1.0028	0.915565	0.441468	1	0.237757	0.434838	0.750039	0.848437	1	0.429943	1	1	0.709159	0.336882	0.656338	0.0289022	0.180486	1	1	1	0.911989	0.506221	0.612493	0.847503	0.878983	0.203881	0.60836	1	1	0.430403	1	0.669877	1	1	1	1	1	0.997024	1.0028	0.962065	0.641639	1.0028	1.0028	1	0.99849	0.972881	0.653148	1
Cluster_PentosePhosphate	1	1.00194	0.892042	0.331723	1	0.973561	0.93007	0.616883	0.728993	0.256254	1	1	1	0.193179	0.706461	0.801959	0.39009	1	1	1	0.255166	0.995714	0.386345	0.350385	0.663222	0.982681	0.397216	0.913167	1	0.366024	0.697252	1	1	1	1	1	1	1	0.873775	1.00194	0.117624	0.436462	1.00194	1.00194	1	0.754567	0.990704	0.328122	0.123996
Cluster_Peroxisome	1	1.00432	0.958444	1	0.476154	0.822226	0.608254	0.0116289	0.121734	0.374364	0.579079	0.751649	1	0.982496	0.471106	0.97276	1	0.686809	1	1	1	0.769745	1	0.964785	0.0752512	0.439936	0.0998859	0.788434	1	0.637232	0.913781	1	0.67918	1	1	1	1	1	0.851141	1.00432	0.27368	0.644522	1.00432	1.00432	0.0442345	0.728918	0.719808	0.929712	0.555624
Cluster_PHD1	0.987055	1.00759	0.963382	1	0.678043	0.963488	0.0427232	0.976296	0.519608	0.539524	1	0.692073	1	0.856151	0.801995	0.705151	0.854617	0.923053	1	1	1	0.998222	0.851104	0.856872	0.602905	0.867089	0.806251	0.62763	0.574403	0.247595	0.521453	1	0.864228	0.491924	1	1	1	0.464877	0.993691	1.00759	0.688746	0.0959203	1.00759	1.00759	1	0.932576	0.999665	0.069316	0.568032
Cluster_PHO4	0.964002	1.00302	0.133353	1	1	0.737143	0.27512	1	0.581858	0.460932	0.454099	0.24115	0.351874	0.301259	0.227727	0.187065	0.536784	0.211345	1	1	1	0.294765	0.532349	0.208813	0.976762	0.0995303	0.717089	0.0100384	1	0.508024	0.327167	1	0.198618	1	1	1	1	0.125864	0.80435	1.00302	0.852168	0.0157858	1.00302	1.00302	1	0.864454	0.472125	0.0143501	0.883206
Cluster_Phospholipid	0.101211	1.00759	0.675814	1	0.305779	0.997915	0.556944	0.275936	0.714261	0.539524	0.43916	0.692073	0.288927	0.602408	0.887613	0.705151	0.114049	0.986198	1	1	0.683016	0.998222	0.851104	0.283952	0.750072	0.537816	0.806251	0.991119	1	0.247595	0.768511	1	0.551121	0.491924	0.0149604	0.0125501	0.35089	0.797208	0.59897	1.00759	0.688746	0.500211	1.00759	1.00759	1	0.169094	0.991451	0.471252	0.568032
Cluster_Polyamine	0.694545	1.00107	0.998578	1	1	0.961364	1	0.413021	1	1	1	1	1	0.397268	0.900384	1	1	1	1	1	1	0.999777	1	0.733892	0.738694	0.822397	0.761675	0.921638	1	1	0.781455	1	1	1	1	1	1	1	0.999394	1.00107	1	1	1.00107	1.00107	1	0.650507	0.999965	0.85954	1
Cluster_primig-EarlySpo	0.936624	1.01245	0.999715	0.720239	0.842792	0.965002	0.995936	0.696455	0.899774	0.277912	0.0913317	0.181052	0.830347	0.438491	0.836703	0.850785	0.957071	0.00410721	1	1	0.846738	0.999998	1	0.938651	0.974185	0.998983	0.693849	0.994218	0.752064	0.539456	0.962682	1	0.767125	0.0943017	1	0.246945	0.153393	0.926085	0.989041	1.01245	0.751346	0.963285	1.01245	1.01245	0.251459	0.693999	1	0.996462	0.8394
Cluster_primig-LateSpo	0.996464	1.04145	1	0.692431	0.934188	0.997589	0.807726	0.476408	0.407997	0.968424	0.985499	0.790707	0.657614	0.905309	0.954834	0.97695	0.510971	0.431257	1	0.301421	0.535946	1	1	0.999995	0.312867	0.999862	0.687993	0.998813	0.27189	0.893822	0.999969	1	0.990755	0.460816	1.00002	0.225812	0.898109	0.914235	1	1.04145	0.997757	0.947932	1.04145	1.04145	0.602068	0.990548	1	0.998212	0.352206
Cluster_primig-MidSpo	0.904677	1.00913	0.953699	0.278238	0.743608	0.991465	0.661233	1	0.686977	0.686577	0.260943	0.946726	0.367751	0.953063	0.371187	0.0337703	0.390839	0.876098	1	0.0782846	0.393773	0.999527	1	0.669188	0.684453	0.933341	0.857544	0.650311	0.641526	0.343293	0.97921	1	0.267475	1.14233e-05	1	1	1	0.285692	0.768405	1.00913	0.46167	0.686745	1.00913	1.00913	0.158521	0.828817	0.999994	0.639435	0.866707
Cluster_Proline	1	1.00086	0.910806	0.163924	1	1	0.693213	0.346992	0.440066	1	1	1	1	0.285966	0.841958	0.512886	0.197186	1	1	1	1	0.962796	0.195	0.232536	0.237131	0.941453	1	0.977275	1	1	0.924806	1	0.521832	1	1	1	1	1	0.960965	1.00086	1	1	1.00086	1.00086	1	0.512268	0.98486	0.791967	0.458176
Cluster_Proteasome	0.00690443	1.00671	0.88921	1	0.633359	0.798427	0.714122	1	0.409152	0.244188	0.141083	0.0531602	1	0.749646	0.865662	0.905188	0.228195	0.707646	1	1	0.638378	0.996894	0.492678	0.435771	0.886506	0.535613	0.822008	0.818811	1	0.792703	0.674373	1	0.976359	1	1	1	1	0.75649	0.853058	1.00671	0.937484	0.756512	1.00671	1.00671	1	0.72867	0.924883	0.576744	0.837293
Cluster_Purine	0.195387	1.00497	0.388321	0.643568	1	0.990707	0.214401	3.33088e-09	0.83707	0.0972594	0.0707109	0.197754	1	0.0571695	0.491624	0.538122	1	0.939832	1	1	1	0.880317	0.118235	0.274633	3.54619e-06	0.119023	0.528421	0.432476	1	0.101565	0.727149	1	0.557999	1	1	1	1	0.649057	0.0778204	1.00497	0.603496	0.738542	1.00497	1.00497	1	0.41533	0.661035	0.911551	0.858736
Cluster_PUT3	0.63088	1.0065	0.795073	0.141625	1	0.33534	0.817417	0.180197	0.380767	0.854306	0.131286	0.327134	0.605809	0.557734	0.580852	0.213064	0.80833	0.457004	1	1	0.0703812	0.997519	0.804369	0.396111	0.580909	0.322577	0.795614	0.482589	1	0.440039	0.208328	1	0.586041	0.440145	1	1	1	1	0.458888	1.0065	0.344037	0.347673	1.0065	1.0065	0.402103	0.0828995	0.996112	0.374918	0.122608
Cluster_Pyrimidine	0.777824	1.00519	0.989901	0.283063	0.539853	0.494712	0.773446	0.71384	0.215126	0.753935	1	0.812175	0.524908	0.639746	0.97264	0.780915	0.369666	1	1	1	1	0.999513	0.728652	0.315961	0.698881	0.75528	0.99091	0.984023	1	0.70398	0.646721	1	0.930347	1	1	1	0.256198	0.664717	0.989626	1.00519	0.143567	0.175399	1.00519	1.00519	1	0.191542	0.999845	0.975803	0.247748
Cluster_RAP1	0.995777	1.00497	0.973636	1	0.524689	0.580891	0.990133	0.9142	0.189889	0.236866	0.630437	0.798585	1	0.593906	0.660584	0.324347	0.717912	0.939832	1	1	0.52952	0.99965	0.713458	0.929593	0.825839	0.224197	0.342891	0.751396	1	0.314925	0.573544	1	0.919077	0.358783	1	1	0.0315282	0.649057	0.744544	1.00497	0.913377	0.903922	1.00497	1.00497	1	0.41533	0.999885	0.658105	0.858736
Cluster_RCS1	0.94495	1.00432	0.988081	0.592109	1	0.509799	0.0160703	0.614653	0.773679	1	0.579079	0.751649	1	0.641514	0.298067	0.662601	0.289938	0.913115	1	1	1	0.920508	0.285065	0.717989	0.882982	0.439936	0.379676	0.0622893	1	1	0.817653	1	0.441876	1	1	1	1	1	0.706017	1.00432	0.95625	0.854623	1.00432	1.00432	1	0.558011	0.981981	0.929712	0.799145
Cluster_REB1	0.992775	1.0065	0.415574	0.0400088	0.621257	0.214527	0.678571	0.821866	0.790629	0.650011	1	0.876523	0.605809	0.143177	0.291442	0.371067	0.80833	0.974497	1	1	0.0147113	0.53703	0.475271	0.0298454	0.580909	0.322577	0.649061	0.116509	0.51897	0.182307	0.612068	1	0.76878	1	1	1	1	0.745099	0.458888	1.0065	0.512827	0.0950674	1.0065	1.0065	1	0.154089	0.796212	0.900434	0.0527493
Cluster_RFX1	0.797918	1.0041	0.756366	1	0.458906	0.423194	0.353701	1	0.482908	0.888817	1	0.733697	1	0.386865	0.958637	0.844717	0.269716	0.166096	1	1	0.463452	0.79236	1	0.956043	0.136766	0.528001	0.96875	0.529386	1	1	0.416505	1	0.643584	0.307151	1	1	1	1	0.749554	1.0041	0.0415186	0.364002	1.0041	1.0041	1	0.821283	0.739543	0.971534	0.519307
Cluster_RGM1	1	1.00367	0.999999	0.533264	1	0.784873	1	1	0.689772	0.859832	1	0.317825	1	0.994633	0.447267	0.133572	1	0.597065	1	1	1	1	1	1	0.98964	0.937185	0.232068	0.972459	1	1	0.98935	1	1	1	1	1	1	1	0.999996	1.00367	0.918681	0.783214	1.00367	1.00367	1	0.999796	1	0.853365	0.926347
Cluster_RGT1	0.753449	1.00737	0.988968	0.184623	1	0.977565	0.233259	0.871972	0.85648	0.980502	1	1	1	0.40909	0.040902	0.0419037	1	0.915053	1	1	1	0.451387	0.265946	0.0355002	0.720639	0.336546	0.482666	0.546155	1	1	0.948185	1	0.848385	1	1	1	0.342796	1	0.969855	1.00737	0.962351	0.980692	1.00737	1.00737	0.112395	0.842782	0.901715	0.823489	0.350916
Cluster_RIM101	0.872058	1.00606	0.991578	0.71537	1	0.762291	0.758759	0.790716	0.982937	1	1	1	0.58049	0.961178	0.93817	0.862762	1	0.212162	1	1	1	0.974756	0.181427	0.0936807	0.975492	0.742918	0.944415	0.962353	1	1	0.114686	0.092028	0.718141	0.418001	1	1	1	0.720701	0.833194	1.00606	0.965357	0.679323	1.00606	1.00606	1	0.996092	0.944894	0.973978	0.365606
Cluster_RLM1	0.971623	1.00323	0.674954	0.489415	1	0.431458	0.332272	0.456677	0.886679	0.823309	1	0.266753	1	0.800716	0.954798	0.932842	1	0.8398	1	1	1	0.99414	0.5571	0.895695	0.265824	0.718163	0.919215	0.998597	1	1	0.628284	1	0.937358	1	1	1	0.168736	1	0.758121	1.00323	0.680868	0.0782353	1.00323	1.00323	1	0.367701	0.99377	0.353411	0.65032
Cluster_RME1	0.688039	1.00345	0.997154	0.511829	0.403705	0.999534	0.204611	0.491211	0.656599	0.842624	1	0.671702	0.0836754	0.836603	0.967967	0.943927	0.58509	1	1	1	1	0.999843	0.580546	0.756127	0.764153	0.792085	0.801479	0.985108	0.322748	0.555514	0.943182	1	1	1	1	1	1	1	0.984599	1.00345	0.724848	0.485982	1.00345	1.00345	1	0.818718	0.999903	0.633237	0.401874
Cluster_RNAPol	0.00928182	1.01156	0.9999	0.681957	0.820861	0.274944	0.373326	0.975957	0.281248	0.938947	1	0.281985	1	0.674403	0.809914	0.516142	0.784147	0.743803	1	1	0.51318	0.996351	0.0585502	0.0493985	0.833117	0.889164	0.579754	0.95176	1	0.74497	0.579956	1	0.546409	0.0796312	1	1	0.480914	0.42061	0.959149	1.01156	0.928014	0.76896	1.01156	1.01156	1	0.982847	0.859761	0.998864	0.642598
Cluster_ROX1	0.964002	1.00302	0.970035	1	1	0.959082	0.0426651	0.775363	0.868944	0.801628	1	1	1	0.986478	0.936685	0.411817	0.536784	1	1	1	0.367773	0.995811	1	0.975544	0.876284	0.999257	0.898294	0.723868	1	0.508024	0.533639	1	0.924628	1	1	1	1	1	0.923991	1.00302	0.852168	0.0597621	1.00302	1.00302	1	0.136835	0.999499	0.284866	0.61171
Cluster_RPH1	0.873405	1.00475	0.979346	1	1	0.902625	0.698616	0.667217	0.586095	0.921471	0.237655	1	1	0.998852	0.760817	0.500944	0.701916	0.470885	1	1	1	0.968329	0.697415	0.915017	0.919465	0.993211	0.836288	0.498542	1	1	0.494583	1	0.742292	1	1	1	1	1	0.984644	1.00475	0.360839	0.978868	1.00475	1.00475	1	0.824877	0.999306	0.604859	0.382297
Cluster_RPs	0.999991	1.03049	1	0.139898	0.813656	0.967043	0.999881	0.999943	0.0228977	0.521818	0.997421	0.200343	0.924436	0.999981	0.999884	0.999989	0.995441	0.959298	1	1	0.446335	1	0.999438	0.999815	0.999982	0.999922	0.934566	1	1	0.992336	0.99998	1	0.979248	1	1.00001	1	0.499458	0.862043	1	1.03049	0.997499	0.96394	1.03049	1.03049	1	0.998096	1	1	0.995799
Cluster_rRNAprocessing	0.119301	1.00781	0.999531	1	1	0.973329	0.301754	0.500258	0.964638	0.915944	0.453623	1	1	0.876078	0.22087	0.555982	0.580786	0.799167	1	1	0.693293	0.646543	1.31061e-06	4.61487e-09	0.332168	0.974187	0.163507	0.438986	0.213837	1	0.995493	1	0.955887	1	1	1	1	1	0.998979	1.00781	0.973442	0.943708	1.00781	1.00781	1	0.996949	0.962896	0.999324	0.972359
Cluster_RTG1	0.567558	1.00825	0.600042	0.50061	0.707966	0.585232	0.793141	0.544233	0.903469	0.987756	0.21538	1	0.692783	0.70844	0.432311	0.280334	0.331463	0.445628	1	1	0.712862	0.607395	0.873617	0.386867	0.701508	0.892422	0.766492	0.137213	0.604573	0.854914	0.322982	1	0.177595	1	1	1	0.0780404	1	0.769147	1.00825	0.981411	0.410239	1.00825	1.00825	0.479029	0.789258	0.866356	0.73383	0.978729
Cluster_RTG3	0.765482	1.00388	0.559591	1	1	0.335885	0.876407	1	0.445861	1	1	0.714451	0.102606	0.996057	0.181572	1	0.628376	0.889014	1	1	0.445543	0.814428	1	0.631761	0.832435	0.43382	0.0187751	0.238178	1	1	0.180987	1	0.0676801	1	1	1	1	1	0.966082	1.00388	0.933718	1	1.00388	1.00388	1	0.601691	0.936053	0.961747	1
Cluster_RTS2	0.480673	1.00258	0.790096	1	0.0536364	0.0538371	0.852247	0.345789	0.495801	1	1	1	0.310395	0.188198	0.704043	0.884652	1	1	1	1	0.0549439	0.928008	0.478639	0.553581	0.812751	0.934623	0.607244	0.861681	1	1	0.757168	1	1	1	1	1	1	1	0.885355	1.00258	0.267279	1	1.00258	1.00258	1	0.315579	0.978321	0.991041	0.841206
Cluster_SFL1	0.94495	1.00432	0.881379	1	1	0.822226	0.232039	0.88172	1	0.374364	0.206063	0.392602	0.462021	0.260766	0.298067	0.222617	1	0.686809	1	1	0.480786	0.995417	1	0.964785	0.966822	0.146928	0.582437	0.45775	1	1	0.913781	1	0.0386953	1	1	0.0943632	1	0.597576	0.299784	1.00432	0.8547	0.854623	1.00432	1.00432	1	0.860867	0.917155	0.167418	0.31351
Cluster_SFP1	0.82651	1.00432	0.486975	0.592109	0.476154	0.916473	0.917952	1	0.0430005	0.657688	1	0.146881	0.462021	0.982496	0.91365	0.97276	0.289938	0.913115	1	1	0.480786	0.920508	0.285065	0.512427	0.323949	0.439936	0.773128	0.955138	0.082081	0.259093	0.0906683	0.0665789	0.874154	0.320432	1	1	0.218502	0.222004	0.706017	1.00432	0.993513	0.20719	1.00432	1.00432	1	0.223425	0.917155	0.30743	0.555624
Cluster_SIG1	0.0422026	1.00584	0.857212	0.111974	1	0.158433	0.383342	0.944097	0.726149	0.956033	1	0.8477	1	0.423536	0.0371117	0.0630108	1	1	1	1	0.215093	0.328139	0.769588	0.44366	0.637568	0.978786	0.210744	0.00632851	1	1	0.982278	1	0.486341	1	1	1	1	0.707644	0.860089	1.00584	0.575231	0.650101	1.00584	1.00584	1	0.891861	0.988397	0.372574	0.546923
Cluster_SIP4	0.691479	1.00803	0.88787	1	1	0.85421	0.939348	0.522486	0.893236	0.209921	1	0.924361	0.683052	0.675223	0.516773	0.0312228	0.13272	0.81428	1	1	0.335268	0.91683	0.866517	0.953334	0.237299	0.861617	0.991025	0.522099	0.59476	0.847321	0.514616	1	0.770888	0.511284	1	1	1	0.494217	0.972653	1.00803	0.97776	0.998494	1.00803	1.00803	1	0.847425	0.988774	0.997812	0.913102
Cluster_SKN7	0.916238	1.00803	0.88787	0.810262	0.698312	0.957955	0.870887	0.164508	0.755162	0.585056	0.467872	0.456863	0.683052	0.254271	0.994926	0.880158	0.869845	0.936973	1	1	0.114832	0.990228	0.309902	0.953334	0.367305	0.0126188	0.997918	0.854963	0.0113228	0.107095	0.643125	1	0.276686	0.156569	1	0.167817	1	0.225151	0.52666	1.00803	0.0998152	0.233062	1.00803	1.00803	1	0.632074	0.958853	0.423492	0.43179
Cluster_SKO1	0.642685	1.00323	0.869746	0.489415	1	0.245927	0.779363	0.187799	0.886679	0.498095	1	0.647993	1	0.589291	0.0186157	0.224008	0.561599	0.243226	1	1	1	0.640137	1	0.713767	0.484972	0.325506	0.0168316	0.0328897	1	0.532369	0.628284	1	0.746414	1	1	1	1	1	0.964764	1.00323	0.97709	0.927747	1.00323	1.00323	1	0.900308	0.817687	0.977344	0.360747
Cluster_SMP1	0.418873	1.00432	0.230397	0.217207	1	0.336588	0.112786	0.88172	0.518732	0.900982	1	0.392602	1	0.641514	0.163054	0.222617	1	0.0704417	1	1	1	0.769745	0.285065	0.162126	0.0752512	0.439936	0.379676	0.788434	0.385749	1	0.330206	1	0.874154	1	1	1	0.218502	0.222004	0.508835	1.00432	0.8547	0.087499	1.00432	1.00432	1	0.558011	0.719808	0.486904	0.953568
Cluster_SOK2	0.95478	1.00453	0.948168	0.610035	1	0.94104	0.276445	0.641693	1	0.684261	0.221813	0.416735	1	0.846019	0.710226	0.977261	1	0.439491	1	1	1	0.994027	1	0.755103	0.902759	0.694849	0.430213	0.729586	1	0.277747	0.86348	1	0.712068	1	1	1	1	1	0.967973	1.00453	0.964558	0.0396047	1.00453	1.00453	1	0.625166	0.999473	0.365656	0.590248
Cluster_sphingolipids	0.755575	1.00258	0.790096	0.0942698	1	0.329254	0.852247	1	0.824729	0.749978	0.404724	1	1	0.3957	0.47329	0.0343576	0.482879	0.768821	1	1	0.324917	0.735537	1	0.806758	0.960194	0.634266	0.968092	0.861681	1	0.455485	0.901416	1	0.890897	1	1	1	1	0.420546	0.204209	1.00258	0.519084	0.596458	1.00258	1.00258	1	0.978098	0.978321	0.581621	0.841206
Cluster_SRD1	0.324023	1.00671	0.195475	0.751337	1	0.798427	0.974048	0.198305	0.809115	1	1	0.884867	0.617894	0.43759	0.632939	0.594657	0.818634	0.279524	1	1	1	0.514915	0.22287	0.282089	0.772001	0.971394	0.523662	0.28784	0.530601	1	0.0886229	1	0.425822	1	1	1	0.317913	0.403359	0.740281	1.00671	0.717177	0.895093	1.00671	1.00671	1	0.91485	0.513919	0.91872	0.660465
Cluster_STB1	0.446151	1.00345	0.636009	1	0.403705	0.983584	0.0878227	1	0.902018	1	0.499398	0.671702	1	0.421544	0.999384	1	0.58509	0.10207	1	1	0.407925	0.961199	1	0.915634	0.986437	0.966828	0.989903	0.952477	1	1	0.522055	1	0.277207	0.265748	1	1	0.178932	1	0.4888	1.00345	0.0450668	0.753296	1.00345	1.00345	0.239589	0.263386	0.952654	0.422886	0.182529
Cluster_STE12	0.95478	1.00453	0.860508	1	0.492856	0.748916	0.998004	0.893721	0.952672	0.405248	1	1	0.478477	0.493933	0.710226	0.882742	0.685017	0.923129	1	1	1	0.973788	1	0.971842	0.902759	0.529405	0.430213	0.93151	1	0.655207	0.585009	1	0.481853	1	1	1	1	1	0.66116	1.00453	0.87732	0.238606	1.00453	1.00453	1	0.156552	0.978629	0.547527	0.821134
Cluster_Sterols	0.519051	1.00584	0.940411	0.702266	0.582521	0.957236	0.857813	0.773408	0.896585	0.0660367	0.317102	0.0313875	0.198021	0.268094	0.838568	0.992313	0.0529716	0.613704	1	1	1	0.93091	1	0.967714	0.637568	0.803534	0.525802	0.6598	0.13631	0.145765	0.698809	1	0.857153	0.406607	1	1	1	0.338718	0.398693	1.00584	0.958194	0.257581	1.00584	1.00584	1	0.795678	0.99779	0.966413	0.335607
Cluster_STP1	0.979733	1.0054	0.996393	1	0.18745	0.837544	0.646793	0.735027	0.441678	0.944547	1	0.82485	0.539454	0.682344	0.295352	0.394769	0.747385	1	1	1	1	0.947931	1	0.952082	0.873411	0.982382	0.069551	0.313703	1	1	0.986508	1	0.817941	1	1	1	0.265339	1	0.995252	1.0054	0.98498	0.789489	1.0054	1.0054	0.348437	0.916295	0.991688	0.944879	0.978494
Cluster_STP2	0.66905	1.00562	0.995125	1	0.568754	0.207674	0.687319	0.754864	0.473194	1	0.675557	1	1	0.551781	0.352103	0.247437	0.76095	0.587283	1	1	0.573708	0.34869	0.155108	0.584438	0.892675	0.968797	0.177429	0.569683	1	1	0.769754	1	0.133785	1	1	1	0.0395698	0.69398	0.622498	1.00562	0.861815	0.619159	1.00562	1.00562	1	0.97486	0.603788	0.999512	1
Cluster_SUM1	0.851566	1.00453	0.860508	0.233602	1	0.867339	0.276445	0.893721	0.796891	0.405248	1	0.768395	1	0.687633	0.36196	0.462517	0.685017	1	1	1	0.497564	0.994027	0.680479	0.197172	0.902759	0.3586	0.430213	0.567279	1	0.655207	0.938931	1	0.481853	1	1	1	1	0.615521	0.461233	1.00453	0.0736492	0.678286	1.00453	1.00453	1	0.957727	0.906909	0.86169	0.16743
Cluster_SWI4	0.810998	1.01267	0.477972	0.729185	0.5548	0.868646	0.134016	0.539909	0.53165	0.174839	0.446715	0.191403	0.835578	0.4702	0.950136	0.932768	0.606354	0.0017408	1	1	0.562179	0.951004	0.819449	0.996636	0.630501	0.211074	0.940001	0.790488	0.0496767	0.551391	0.511723	1	0.166099	0.0981329	1	1	0.512241	0.929407	0.119204	1.01267	7.23388e-07	4.24431e-05	1.01267	1.01267	0.631172	0.229657	0.970248	0.149883	0.111422
Cluster_SWI5	0.409913	1.00825	0.873661	0.50061	0.341113	0.93698	0.980727	0.753952	0.596311	0.112746	0.807441	0.734962	1	0.909083	0.885178	0.61208	0.610575	0.64932	1	1	0.347123	0.907812	0.873617	0.960524	0.912261	0.0851591	0.93907	0.986895	0.604573	0.11532	0.994146	1	0.303111	0.520688	1	1	0.37459	1	0.641104	1.00825	0.476889	0.410239	1.00825	1.00825	0.479029	0.679038	0.987234	0.135887	0.644178
Cluster_SWI6	0.59528	1.00628	0.654188	0.7279	0.608759	0.552992	0.898034	0.162748	0.352336	0.626633	0.34848	0.5894	0.220549	0.056931	0.674803	0.963853	0.199836	0.00020413	1	1	1	0.559546	1	0.838824	0.541121	0.151	0.439474	0.89085	0.507053	0.770477	0.263973	1	0.0161815	1	1	1	1	1	0.0766942	1.00628	0.000109929	0.0116309	1.00628	1.00628	1	0.118494	0.809782	0.326032	0.0439307
Cluster_TFs	0.765482	1.00388	0.918195	1	1	0.518526	0.876407	0.100709	0.21749	0.599231	0.540955	0.34308	1	0.537547	0.0834445	0.00483405	0.628376	0.889014	1	1	0.445543	0.999623	1	0.945245	0.642251	0.780791	0.692202	0.603353	0.355011	1	0.511886	1	0.359663	1	1	1	1	1	0.791067	1.00388	0.989252	1	1.00388	1.00388	0.265232	0.242199	0.998193	0.884408	0.7479
Cluster_THI2	0.90871	1.00519	0.789673	0.283063	1	0.889174	0.417882	0.71384	0.215126	1	1	0.812175	0.524908	0.994004	0.926996	0.986776	0.733054	0.780236	1	1	1	0.865298	0.728652	0.315961	0.511044	0.450192	0.751366	0.984023	1	1	0.104009	0.0793859	0.795109	1	1	1	1	1	0.999203	1.00519	0.927526	0.765137	1.00519	1.00519	0.337147	0.788318	0.873336	0.706756	0.974914
Cluster_Thiamine	1	1.00237	0.999849	1	1	0.856289	0.961313	0.307035	1	0.340839	1	1	1	0.965952	0.835238	0.561907	1	1	1	1	0.302419	0.999895	1	0.945776	0.498588	0.896897	0.957465	0.995342	1	0.0994102	0.853333	1	1	1	1	1	1	1	0.978167	1.00237	1	1	1.00237	1.00237	1	0.966555	0.999993	0.986722	0.814853
Cluster_tRNAprocessing	0.359137	1.00693	0.749138	1	1	0.912186	0.288221	0.64133	0.942611	0.878407	0.750008	0.892649	1	0.780562	0.992603	0.796358	0.828386	0.980049	1	1	0.650091	0.876759	0.0854516	0.317797	0.902711	0.908867	0.993262	0.867522	1	0.802998	0.730561	1	0.457997	1	1	1	0.326308	0.167735	0.90942	1.00693	0.947083	0.973947	1.00693	1.00693	1	0.868309	0.9175	0.973059	0.685628
Cluster_tRNAsynth	0.289579	1.0065	0.995844	0.739881	0.621257	0.963507	0.678571	0.075503	0.040621	0.854306	1	0.327134	1	0.974645	0.291442	0.371067	0.80833	0.874614	1	1	0.626275	0.997519	0.475271	0.730746	0.0325673	0.842086	0.32251	0.629204	1	0.781872	0.467617	1	0.586041	0.440145	1	1	1	0.146142	0.940462	1.0065	0.926328	0.347673	1.0065	1.0065	1	0.979493	0.996112	0.900434	0.633973
Cluster_Tryptophan	0.0879122	1.00258	0.790096	1	1	0.552543	0.169328	0.000559484	0.015391	1	0.404724	0.566127	1	0.974971	0.704043	0.31489	1	0.768821	1	1	1	0.735537	1	0.806758	2.06559e-05	0.821446	0.840568	0.471127	0.253349	1	0.757168	1	0.625055	1	1	1	0.137395	0.420546	0.462822	1.00258	0.783333	1	1.00258	1.00258	1	0.145417	0.873351	0.581621	0.0780019
Cluster_UGA3	0.164015	1.00475	0.661053	1	0.509028	0.336861	0.0837034	0.386462	0.34463	0.921471	1	0.784015	0.494434	0.35737	0.760817	0.726739	0.330126	1	1	1	0.156544	0.441087	0.697415	0.406085	0.418417	0.613463	0.836288	0.666566	1	0.672294	0.800519	1	0.307295	1	1	1	1	0.63267	0.415811	1.00475	0.754223	0.889541	1.00475	1.00475	1	0.348865	0.680508	0.141217	0.382297
Cluster_USV1	0.872058	1.00606	0.99767	1	1	0.481905	0.952239	0.311978	0.749205	0.960852	0.332843	0.857985	1	0.961178	0.108663	0.308174	0.445675	0.403211	1	1	1	0.974756	0.439406	0.662543	0.675125	0.458584	0.24631	0.178321	1	1	0.987902	1	0.328541	1	1	1	1	0.720701	0.995237	1.00606	0.99222	1	1.00606	1.00606	1	0.833508	0.98646	0.853287	0.577143
Cluster_Vacuole	0.982893	1.01468	0.999999	0.799285	0.162491	0.868158	0.907525	0.821482	0.699705	0.869422	0.782916	0.837869	0.876006	0.981964	0.861115	0.554762	0.0646973	0.897302	1	1	0.366303	0.999995	1	0.985078	0.941694	0.982426	0.886281	0.870216	1	0.967111	0.981502	1	0.949624	0.727673	1	0.283758	1	1	0.999951	1.01468	0.998865	0.86429	1.01468	1.01468	0.684417	0.930271	1	0.718854	0.970606
Node 1	0.759086	1.00129	0.422035	1	0.176071	0.614465	0.178402	1.03325e-06	0.581093	0.499742	1	0.0562817	1	0.0455214	0.139448	0.660112	1	1	1	1	1	0.916827	1	0.424185	0.000167979	0.898037	0.16812	0.568251	1	1	0.866836	1	0.669434	1	1	1	1	1	0.86451	1.00129	1	1	1.00129	1.00129	1	0.75544	0.725159	1	0.601255
Node 10	0.0405011	1.00215	0.860482	1	1	0.13807	0.76884	0.655664	0.765629	0.298754	1	0.501266	0.0353164	0.258183	0.11939	0.834604	0.0963429	1	1	1	0.279177	0.955553	1	0.714572	0.931832	0.642565	0.0770344	0.66188	1	1	0.56332	1	0.842099	1	1	1	1	1	0.825925	1.00215	0.91921	0.493715	1.00215	1.00215	1	0.821015	0.90762	0.885503	1
Node 11	0.167445	1.0015	0.944887	1	1	0.9895	0.569249	1	1	1	1	1	1	0.59005	0.797902	1	1	1	1	1	1	0.889817	1	0.510632	0.847311	0.94268	0.553314	0.914645	1	1	0.989225	1	0.000134504	0.000222758	1	1	1	1	0.502274	1.0015	0.828039	0.312699	1.0015	1.0015	1	0.831895	0.952239	0.720286	1
Node 12	0.759086	1.00129	0.422035	1	1	0.303558	0.178402	1	0.581093	1	1	0.341126	0.169474	0.499649	0.39234	0.258013	1	0.14433	1	1	0.17826	0.592702	1	0.424185	0.800247	0.671117	0.821141	0.568251	0.00805569	1	0.979405	1	2.24318e-05	1	1	1	1	1	0.973107	1.00129	0.399148	0.0563254	1.00129	1.00129	1	0.949962	0.725159	0.0915416	1
Node 13	0.828692	1.00302	0.993504	0.465976	1	0.539493	0.98409	1	0.290418	0.801628	0.454099	0.622577	1	0.758431	0.936685	1	0.536784	0.818962	1	1	1	0.975639	1	0.975544	0.876284	0.91985	0.717089	0.723868	1	1	0.533639	1	0.710255	1	1	1	1	1	0.999856	1.00302	0.970518	0.682731	1.00302	1.00302	1	0.702002	0.995239	0.496139	0.883206
Node 14	0.46469	1.00453	0.693255	0.610035	1	0.94104	0.983522	0.641693	0.952672	0.911818	0.596942	0.416735	0.478477	0.687633	0.538274	0.695949	1	0.439491	1	1	0.497564	0.973788	1	0.971842	0.57223	0.529405	0.630007	0.729586	1	1	0.938931	1	0.712068	1	1	1	1	1	0.967973	1.00453	0.964558	0.678286	1.00453	1.00453	0.302103	0.987107	0.700113	0.945717	0.821134
Node 15	0.100858	1.00345	0.636009	0.511829	1	0.859681	0.942652	0.818588	0.902018	0.842624	0.499398	1	0.390875	0.95054	0.967967	0.943927	0.58509	0.858244	1	1	1	0.99205	1	0.985622	0.764153	0.906504	0.936034	0.952477	1	1	0.856179	1	0.116953	1	1	1	1	0.517068	0.949336	1.00345	0.982197	0.939377	1.00345	1.00345	0.239589	0.448835	0.952654	0.998146	0.685813
Node 16	1	1.00107	0.998578	1	1	0.961364	1	1	1	0.43849	1	1	1	0.784586	0.900384	0.593096	1	1	1	1	1	0.994925	1	1	0.738694	0.971217	1	0.921638	1	1	0.455406	1	1	1	1	1	1	1	0.989069	1.00107	1	1	1.00107	1.00107	1	1	0.998706	0.85954	1
Node 17	1	1.00021	0.866152	0.043758	1	0.478121	0.255684	1	1	0.108966	1	1	1	1	1	1	1	0.114758	1	1	1	1	1	1	1	0.507937	1	1	1	1	0.47619	1	1	1	1	1	1	1	0.772415	1.00021	1	1	1.00021	1.00021	1	1	0.947876	0.324539	1
Node 18	1	1.00086	0.991403	1	1	0.925909	1	1	1	1	1	1	1	0.707122	0.841958	1	1	0.06737	1	1	1	0.997836	1	1	1	0.941453	0.682461	0.833937	1	1	0.651035	1	1	1	1	1	1	1	0.960965	1.00086	0.634184	1	1.00086	1.00086	1	1	0.98486	1	1
Node 19	1	1.00021	1	1	1	1	1	1	1	1	1	1	1	1	1	1	1	1	1	1	1	1	1	1	1	1	1	1	1	1	1	1	1	1	1	1	1	1	1	1.00021	1	1	1.00021	1.00021	1	1	1	1	1
Node 2	0.939767	1.00715	0.857015	0.427137	0.282027	0.671464	0.883581	0.0146051	0.147421	0.889028	2.51905e-10	0.383547	1	0.808545	0.592503	0.0798361	1	0.326535	1	1	1	0.983007	0.833919	0.513734	0.00450355	0.872921	0.979321	0.951759	1	0.489837	0.0926631	1	0.831008	1	1	0.0112036	0.0609059	0.777775	0.946639	1.00715	0.955315	0.91789	1.00715	1.00715	1.5039e-05	0.560378	0.999784	0.886826	0.709448
Node 2_fuzzy0.06	0.986514	1.01068	0.9751	0.639523	0.464459	0.604275	0.840775	2.70115e-06	0.115378	0.914951	6.69589e-09	0.419857	0.782091	0.41933	0.565738	0.0955318	1	0.498965	1	1	1	0.999485	0.930779	0.734073	2.45221e-05	0.834828	0.894509	0.904876	0.330175	0.438091	0.115459	1	0.856288	1	1	0.0237907	0.0214621	0.647556	0.962143	1.01068	0.675195	0.691424	1.01068	1.01068	2.81416e-10	0.58267	0.999995	0.991235	0.845113
Node 20	1	1.00258	1	0.41584	1	0.999597	0.626991	1	1	0.749978	1	0.566127	0.310395	0.974971	0.996076	1	1	1	1	1	1	1	1	1	1	0.983243	0.968092	0.999769	1	1	0.971801	1	1	1	1	1	1	1	0.999985	1.00258	0.95119	0.877706	1.00258	1.00258	1	0.978098	1	1	1
Node 21	0.982369	1.00367	0.999986	1	1	0.989782	0.252053	1	0.915283	1	1	1	1	0.866767	0.995728	0.795814	1	1	1	1	1	1	1	0.988977	0.98964	0.979179	0.992428	0.999692	1	1	0.98935	1	0.956736	1	1	1	1	1	0.999747	1.00367	0.986167	0.949137	1.00367	1.00367	1	0.985833	1	1	0.926347
Node 22	0.509043	1.00064	0.951105	1	1	0.467195	0.587736	0.273552	0.352672	1	1	1	1	1	1	1	1	1	1	1	1	0.980316	1	1	0.139989	0.880938	1	0.664569	1	1	0.856363	1	1	1	1	1	1	0.127404	0.868253	1.00064	0.529579	0.408313	1.00064	1.00064	1	1	0.992161	1	0.0547086
Node 23	1	1.00064	1	1	1	1	1	1	1	1	1	1	1	1	1	1	1	1	1	1	1	1	1	1	1	1	1	1	1	1	1	1	1	1	1	1	1	1	1	1.00064	1	1	1.00064	1.00064	1	1	1	1	1
Node 24	1	1.00021	1	1	1	1	1	1	1	1	1	1	1	1	1	1	1	1	1	1	1	1	1	1	1	1	1	1	1	1	1	1	1	1	1	1	1	1	1	1.00021	1	1	1.00021	1.00021	1	1	1	1	1
Node 25	1	1.00021	0.866152	1	1	0.478121	0.255684	1	1	1	0.0422565	1	1	1	1	1	1	1	1	1	1	0.916559	1	1	1	0.507937	1	1	1	1	1	1	1	1	1	1	1	1	0.772415	1.00021	1	1	1.00021	1.00021	0.0169455	1	0.947876	1	1
Node 26	1	1.00043	1	1	1	1	1	1	1	1	1	1	1	1	1	1	1	1	1	1	1	1	1	1	1	1	1	1	1	1	1	1	1	1	1	1	1	1	1	1.00043	1	1	1.00043	1.00043	1	1	1	1	1
Node 27	1	1.00086	0.910806	1	1	0.654058	0.271304	1	0.440066	0.369756	1	1	1	1	0.841958	0.512886	1	1	1	1	1	0.962796	1	1	0.658196	1	1	0.977275	1	0.183265	0.651035	1	1	0.0742263	1	1	1	1	0.77554	1.00086	0.215763	1	1.00086	1.00086	1	0.17085	0.98486	0.791967	0.0992191
Node 28	1	1.00021	1	1	1	1	1	1	1	1	1	1	1	1	1	1	1	1	1	1	1	1	1	1	1	1	1	1	1	1	1	1	1	1	1	1	1	1	1	1.00021	1	1	1.00021	1.00021	1	1	1	1	1
Node 29	1	1.00086	0.910806	1	1	1	0.271304	0.346992	0.0904899	0.369756	0.158659	1	1	1	0.841958	0.512886	1	1	1	1	1	0.997836	1	0.653181	0.658196	0.941453	1	0.833937	0.0927171	0.183265	0.924806	1	0.134261	1	1	1	1	1	0.77554	1.00086	1	0.503308	1.00086	1.00086	0.0660993	0.17085	0.98486	1	0.458176
Node 3	1	1.0054	1	1	1	1	0.999391	1	1	0.944547	1	1	1	1	1	1	1	1	1	1	1	1	1	0.998687	1	1	1	1	1	0.71866	1	1	1	1	1	1	1	1	1	1.0054	0.998166	1	1.0054	1.0054	1	1	1	0.999947	0.978494
Node 30	1	1.00172	0.999876	1	1	0.825067	0.647127	0.573745	1	1	1	1	1	0.914328	0.857993	0.76288	1	0.623158	1	1	1	0.999821	1	1	0.883294	0.996584	0.899284	0.957105	1	1	0.822182	1	1	1	1	1	1	0.0460361	0.981809	1.00172	1	1	1.00172	1.00172	1	0.886046	0.999982	0.790349	1
Node 31	0.998359	1.00803	0.992832	0.810262	0.698312	0.524083	0.939348	0.737395	0.755162	0.923463	1	1	1	0.994744	0.516773	0.408554	0.869845	0.936973	1	1	1	0.999996	1	0.953334	0.956911	0.997235	0.851486	0.652323	0.59476	0.847321	0.757447	1	0.990941	1	1	1	1	0.814948	0.941043	1.00803	0.937814	0.866907	1.00803	1.00803	1	0.499467	0.999998	0.810373	0.79148
Node 32	0.998373	1.00584	0.857212	1	0.582521	0.0148283	0.982419	0.523069	0.896585	0.956033	1	1	1	0.952189	0.967574	0.951165	0.77379	0.963151	1	1	1	0.994548	1	0.787392	0.909317	0.892934	0.932846	0.6598	1	1	0.698809	1	0.486341	1	1	1	1	1	0.741705	1.00584	0.990301	0.831907	1.00584	1.00584	1	0.951174	0.999653	0.130498	0.335607
Node 33	1	1.00064	0.649739	1	1	1	0.587736	1	1	0.292627	1	1	1	0.601833	0.749296	1	1	0.306334	1	1	1	0.769939	1	0.54802	1	0.511906	0.576947	0.664569	1	1	0.464305	1	1	1	1	1	1	1	0.460755	1.00064	0.529579	1	1.00064	1.00064	1	0.341559	0.851608	0.247562	0.0547086
Node 34	1	1.0015	0.992039	1	1	0.921995	0.873635	1	1	1	1	1	1	1	1	1	1	1	1	1	0.204734	0.984353	1	1	0.847311	0.517368	1	0.914645	1	1	0.448001	1	0.725167	1	1	1	1	1	0.991615	1.0015	0.0475967	1	1.0015	1.0015	1	0.831895	0.995813	0.720286	0.65795
Node 35	1	1.0028	1	1	1	1	1	1	1	1	1	1	0.331454	0.981602	1	1	1	1	1	1	1	1	1	1	1	0.999903	1	1	1	1	0.99978	1	0.909316	1	1	1	1	1	1	1.0028	1	0.897378	1.0028	1.0028	1	1	1	0.993956	1
Node 36	0.999965	1.04145	0.999958	0.0272429	0.522597	0.999975	0.989908	0.379274	0.967754	0.184879	0.656618	0.96676	0.481732	0.952524	0.887556	0.527625	0.930969	0.999811	1	1	0.369564	1	0.999509	0.998466	0.517364	0.815699	0.960344	0.995098	0.64343	0.0338164	0.569652	0.471753	0.954241	0.00742352	1.00002	0.0111156	0.385532	0.419093	0.999929	1.04145	0.967825	0.549016	1.04145	1.04145	1	0.0155587	1	8.38187e-08	0.00247834
Node 37	0.0399718	1.0015	0.944887	0.0346004	1	0.452201	0.873635	0.525761	1	0.554323	1	0.385419	0.194804	0.59005	0.797902	0.716103	1	0.574224	1	1	1	0.889817	1	1	0.517864	0.517368	0.865779	0.732345	1	1	0.732714	1	1	0.126296	1	1	1	0.272493	0.94843	1.0015	0.483548	0.706258	1.0015	1.0015	1	0.564302	0.952239	0.409082	1
Node 38	0.694545	1.00107	0.487333	1	1	0.784089	0.771721	0.413021	0.0197941	1	1	0.0392369	1	1	0.265894	0.192047	0.240101	1	1	1	1	0.941376	1	1	0.0885193	0.514885	0.365603	0.35708	1	1	0.781455	1	0.199494	1	1	1	1	0.203228	0.274776	1.00107	0.715546	0.583069	1.00107	1.00107	1	0.650507	0.97563	0.521675	1
Node 39	0.903747	1.00781	0.999886	0.801509	0.688341	0.81796	0.928246	0.0243506	0.35659	0.354814	0.0166116	0.918872	1	0.876078	0.13397	0.000280651	0.86244	0.930341	1	1	0.693293	1	0.574034	0.765456	0.20816	0.824347	0.965604	0.937969	0.0543132	0.0991485	0.98802	1	0.998726	1	1	1	1	0.80628	0.998979	1.00781	0.718527	0.943708	1.00781	1.00781	0.00298095	0.581898	1	0.378207	0.594346
Node 4	1	1.00237	0.999849	0.0808168	1	0.955417	0.814704	0.690527	0.176726	1	1	1	1	0.588288	0.99377	1	1	1	1	1	0.302419	0.999895	1	1	0.771083	0.896897	0.957465	0.995342	1	1	0.999194	1	1	1	1	1	1	0.393555	0.999405	1.00237	0.456133	0.547128	1.00237	1.00237	1	0.966555	0.999993	1	0.814853
Node 40	1	1.00367	1	1	1	1	1	1	1	1	1	1	1	1	1	1	1	1	1	1	1	1	1	1	1	1	1	1	1	1	1	1	1	1	1	1	1	1	1	1.00367	1	1	1.00367	1.00367	1	1	1	1	1
Node 41	0.926538	1.00237	0.999999	1	1	0.999226	1	0.690527	0.797318	0.340839	0.378395	0.165703	1	0.965952	0.953491	0.561907	1	1	1	1	0.302419	1	1	0.945776	0.771083	0.896897	1	0.975868	1	1	0.853333	1	1	0.191242	1	1	1	0.393555	0.999997	1.00237	0.937202	0.854269	1.00237	1.00237	1	0.966555	1	0.986722	0.476949
Node 42	1	1.00107	0.86425	0.200541	1	1	0.771721	1	0.515678	0.43849	1	0.293652	0.000264579	1	0.608254	1	1	1	1	1	1	0.941376	1	0.733892	0.738694	0.197444	0.365603	0.921638	1	0.223594	0.960643	1	1	1	1	1	0.0596808	0.203228	0.680028	1.00107	0.715546	0.184265	1.00107	1.00107	1	0.650507	0.97563	0.196913	0.535181
Node 43	1	1.00086	0.910806	0.163924	1	0.925909	0.693213	0.346992	1	1	1	1	0.116418	0.707122	0.145636	1	1	1	1	1	1	0.962796	1	0.653181	0.658196	0.32442	0.0502848	0.495201	1	1	0.651035	1	1	1	1	1	0.0480316	1	0.77554	1.00086	0.634184	0.503308	1.00086	1.00086	1	0.864135	0.98486	0.791967	1
Node 44	1	1.00064	0.951105	1	1	1	1	1	1	1	1	1	1	1	1	1	1	1	1	1	1	0.980316	0.150125	0.54802	1	1	1	0.94144	0.0703692	1	0.856363	1	1	1	1	1	1	1	0.868253	1.00064	1	1	1.00064	1.00064	1	0.341559	0.992161	0.691918	1
Node 45	0.98879	1.01536	0.999414	0.818824	0.897246	0.996256	0.425698	0.97794	0.851806	0.134792	0.0738964	0.510754	0.635141	0.976295	0.999364	0.956086	0.731134	0.990409	1	1	0.187331	1	0.891629	0.996391	0.980889	0.888426	0.998608	0.994054	0.820053	0.0555722	0.0419594	1	0.522905	0.743196	1	0.294462	1	0.607803	0.99092	1.01536	0.718314	0.893997	1.01536	1.01536	0.700419	0.0036693	1	0.0704042	0.544503
Node 46	1	1.00107	0.998578	0.200541	0.149027	0.784089	1	1	1	0.43849	1	1	0.143354	1	0.900384	0.593096	0.240101	0.456512	1	1	1	0.999777	1	1	0.738694	0.822397	1	0.921638	1	1	0.781455	1	1	1	1	0.0244357	1	1	0.989069	1.00107	1	0.583069	1.00107	1.00107	0.0819383	0.650507	0.999965	0.85954	0.535181
Node 47	1	1.00064	1	1	1	1	1	1	1	1	1	1	1	1	1	1	1	1	1	1	1	1	1	1	1	1	1	1	1	1	1	1	1	1	1	1	1	1	1	1.00064	1	1	1.00064	1.00064	1	1	1	1	1
Node 48	0.371839	1.00129	0.422035	0.235561	1	0.303558	1	0.472387	1	1	0.228327	1	1	0.841573	0.00252567	0.00825157	1	1	1	1	1	0.592702	0.277791	0.795833	0.800247	0.358652	0.464345	0.0521989	1	1	0.0884727	1	1	1	1	1	1	0.238644	0.212174	1.00129	0.778826	0.650035	1.00129	1.00129	1	0.16918	0.725159	0.905173	0.204806
Node 49	1	1.00086	1	1	1	0.925909	1	1	1	0.369756	1	1	1	1	1	1	0.197186	1	1	1	1	0.999952	1	0.653181	1	1	1	0.977275	1	1	1	1	1	1	1	1	1	1	0.997329	1.00086	0.634184	1	1.00086	1.00086	1	1	0.999993	1	1
Node 5	1	1.00107	0.86425	1	1	0.961364	1	0.0828724	0.515678	1	0.194242	1	1	0.397268	0.608254	0.192047	0.240101	1	1	1	1	0.941376	1	1	0.0885193	0.971217	0.761675	0.921638	1	1	0.781455	1	0.199494	1	1	1	1	1	0.680028	1.00107	0.0763043	0.583069	1.00107	1.00107	1	1	0.765081	0.85954	0.150157
Node 50	1	1.00086	0.910806	1	1	0.654058	0.693213	1	0.440066	1	1	1	1	0.707122	0.47131	0.512886	1	1	1	1	1	0.962796	1	0.653181	0.658196	0.941453	0.682461	0.833937	1	1	0.924806	1	1	1	1	1	1	1	0.960965	1.00086	0.634184	0.503308	1.00086	1.00086	1	0.864135	0.98486	1	1
Node 51	1	1.00086	0.562717	1	0.00575927	0.654058	0.0539622	1	0.0904899	0.0612391	1	1	0.116418	0.707122	0.841958	0.512886	1	1	1	1	1	0.705654	1	0.232536	0.237131	0.32442	0.682461	0.977275	1	0.183265	0.277575	1	0.521832	1	1	1	1	1	0.355827	1.00086	1	1	1.00086	1.00086	1	0.0237465	0.807191	0.103354	0.458176
Node 52	1	1.00021	0.866152	1	1	1	0.255684	0.10103	1	1	1	1	1	1	1	1	1	1	1	1	1	0.916559	1	1	0.235307	0.507937	1	1	1	1	0.47619	1	1	1	1	1	1	1	0.772415	1.00021	1	1	1.00021	1.00021	1	1	0.947876	0.324539	1
Node 53	0.759086	1.00129	0.813827	0.235561	1	0.868901	0.830151	0.472387	1	0.132235	1	0.0562817	1	0.192506	0.39234	0.0601158	1	0.023031	1	1	1	0.916827	0.277791	0.142641	0.800247	0.898037	1	0.568251	0.135828	0.0318679	0.979405	1	0.0638311	1	1	1	1	1	0.587787	1.00129	0.399148	0.650035	1.00129	1.00129	0.097512	0.440641	0.964689	0.905173	0.601255
Node 54	0.759086	1.00129	0.965095	1	1	0.868901	0.178402	0.116192	0.581093	0.499742	1	0.341126	0.169474	0.192506	0.937219	1	0.280731	1	1	1	1	0.990475	1	0.424185	0.430929	0.671117	0.821141	0.836517	0.135828	1	0.866836	1	1	1	1	1	1	1	0.86451	1.00129	1	1	1.00129	1.00129	9.03186e-05	0.440641	0.997512	0.905173	1
Node 55	0.810001	1.0015	0.999296	1	1	0.921995	1	1	1	1	1	1	1	0.883494	1	1	1	1	1	1	1	1	1	1	1	0.993048	1	1	1	1	1	1	0.335034	1	1	1	1	1	0.991615	1.0015	0.828039	0.706258	1.0015	1.0015	1	0.96964	1	0.409082	1
Node 56	0.810001	1.0015	0.999296	1	1	0.921995	1	1	1	1	1	1	1	0.883494	1	1	1	1	1	1	1	1	1	1	1	0.993048	1	1	1	1	1	1	0.335034	1	1	1	1	1	0.991615	1.0015	0.828039	0.706258	1.0015	1.0015	1	0.96964	1	0.409082	1
Node 57	0.285497	1.00107	0.980641	1	1	1	0.771721	0.413021	1	0.43849	1	1	1	1	0.608254	1	1	1	1	1	1	0.994925	1	1	0.738694	0.971217	0.365603	0.702384	1	1	0.781455	1	1	1	1	1	1	1	0.918809	1.00107	0.715546	0.184265	1.00107	1.00107	1	0.917542	0.998706	0.85954	1
Node 58	0.759086	1.00129	0.422035	1	1	0.614465	1	1	0.581093	1	1	0.341126	1	0.499649	0.39234	1	1	1	1	1	1	0.592702	1	0.142641	0.800247	0.358652	0.16812	0.836517	0.00805569	1	0.866836	1	0.0638311	1	1	1	1	1	0.86451	1.00129	0.399148	1	1.00129	1.00129	1	0.75544	0.964689	1	0.601255
Node 59	0.694545	1.00107	0.86425	1	1	0.784089	1	1	0.515678	1	1	0.293652	1	0.784586	0.608254	1	1	1	1	1	1	0.941376	1	0.330337	0.738694	0.971217	0.365603	0.702384	0.114532	1	0.960643	1	0.602416	1	1	1	1	1	0.989069	1.00107	0.715546	1	1.00107	1.00107	1	0.650507	0.998706	1	1
Node 6	0.795002	1.0028	0.915565	1	1	0.829506	0.978604	0.750039	1	0.422208	0.429943	1	1	0.709159	0.558544	0.656338	1	0.795419	1	1	1	0.981403	1	0.968108	0.969585	0.729385	0.203881	0.797177	1	0.482418	0.647179	0.043764	0.669877	1	1	1	1	0.446341	0.847079	1.0028	0.577844	0.641639	1.0028	1.0028	1	0.626879	0.972881	0.091017	0.277732
Node 60	1	1.00064	1	1	1	1	1	1	1	1	1	1	1	1	1	1	1	1	1	1	1	1	1	1	1	1	1	1	1	1	1	1	1	1	1	1	1	1	1	1.00064	1	1	1.00064	1.00064	1	1	1	1	1
Node 61	1	1.00172	0.999876	1	1	0.954305	0.647127	1	1	1	1	1	1	0.914328	1	1	1	0.623158	1	1	1	0.999992	1	0.879842	1	0.865847	1	0.999486	1	1	0.953253	1	0.771514	1	1	1	1	0.304844	0.997498	1.00172	0.560143	1	1.00172	1.00172	1	0.981582	1	0.956794	1
Node 62	0.656958	1.00215	0.965683	1	1	0.324246	0.76884	1	0.765629	1	1	1	1	0.786897	0.538418	0.834604	1	0.704826	1	1	1	0.955553	1	0.714572	0.931832	0.396518	0.47223	0.66188	1	1	0.56332	1	0.229431	1	1	1	1	1	0.987745	1.00215	0.687808	0.493715	1.00215	1.00215	1	0.821015	0.90762	0.885503	1
Node 63	1	1.00021	0.866152	1	1	0.478121	0.255684	1	1	1	1	1	1	1	1	1	1	0.114758	1	1	1	0.916559	1	1	1	0.507937	1	0.61154	1	1	1	1	1	1	1	1	1	1	0.772415	1.00021	1	1	1.00021	1.00021	1	1	0.947876	1	1
Node 64	0.926538	1.00237	0.990259	0.389043	1	0.674378	0.961313	1	1	0.719322	1	1	1	0.588288	0.38318	0.561907	1	1	1	1	1	0.990189	1	1	1	0.292367	0.284481	0.778594	1	0.427156	0.954205	1	0.278614	1	1	1	0.126692	1	0.773099	1.00237	0.937202	1	1.00237	1.00237	1	0.966555	0.998223	0.746821	0.814853
Node 65	0.22781	1.00172	0.316482	1	0.227624	0.954305	0.905993	1	0.686642	0.60296	1	0.426743	1	0.66765	0.335907	0.0292139	1	0.231682	1	1	1	0.497791	1	1	0.285164	0.38067	0.899284	0.118757	1	0.333064	0.583599	1	1	1	1	1	1	1	0.425205	1.00172	0.253764	1	1.00172	1.00172	1	0.886046	0.938466	0.790349	0.317443
Node 66	0.211068	1.00021	0.866152	1	1	1	1	1	1	1	1	1	1	1	0.369369	0.164522	1	1	1	1	1	0.916559	1	1	1	1	1	0.61154	1	1	0.47619	1	1	1	1	1	1	1	0.772415	1.00021	0.222222	1	1.00021	1.00021	1	0.39275	0.947876	0.324539	1
Node 67	0.343564	1.00781	0.80151	0.20728	1	0.135417	0.594977	0.978709	0.20412	0.768204	0.453623	0.918872	0.673014	0.63983	0.603262	0.379526	0.580786	0.226066	1	1	1	0.925333	1	0.94497	0.637574	0.724835	0.830054	0.438986	1	1	0.324231	1	0.580535	0.501697	1	1	1	0.80628	0.562694	1.00781	0.40658	0.852164	1.00781	1.00781	1	0.976267	0.990177	0.254485	0.772914
Node 68	0.138216	1.0054	0.330464	0.67423	1	0.570797	0.805109	1	0.675129	0.0475189	0.285395	0.0230431	1	0.995431	0.873488	0.607955	1	0.559733	1	1	1	0.652537	1	0.542108	0.955062	0.235496	0.902975	0.974186	1	0.351667	0.260732	1	0.415463	1	1	1	1	0.679681	0.481465	1.0054	0.681967	0.201556	1.0054	1.0054	1	0.82904	0.261367	0.424855	0.710441
Node 69	1	1.00043	0.750194	1	1	1	1	1	1	1	1	1	1	0.458735	0.136384	0.302005	1	1	1	1	1	0.840065	1	0.41101	0.415283	0.757927	0.436413	0.37393	1	1	0.725677	1	1	1	1	1	1	1	0.596588	1.00043	1	1	1.00043	1.00043	1	0.631298	0.898459	1	1
Node 7	0.948149	1.05275	0.999905	0.675185	0.592429	0.998953	0.994249	0.960784	0.512026	0.350872	0.633752	0.850309	0.155464	0.966977	0.745487	0.0742598	0.869582	0.972462	1	1	0.197301	1	0.999955	0.999729	0.837526	0.870492	0.975731	0.935447	0.470181	0.0559988	0.863842	1	0.100349	0.268174	1.00004	0.311214	0.303697	0.889038	0.999634	1.05275	0.968579	0.0524466	1.05275	1.05275	0.343492	0.0837322	1	1.37296e-11	0.70705
Node 70	1	1.00043	0.750194	1	1	0.228546	1	1	1	1	1	0.00449415	1	0.0697939	0.136384	1	1	1	1	1	1	0.840065	1	1	1	1	0.062085	0.37393	1	1	0.226704	1	1	1	1	1	1	1	0.596588	1.00043	0.0493456	1	1.00043	1.00043	1	1	0.898459	0.105278	1
Node 71	1	1.00086	0.562717	1	1	0.654058	0.693213	1	1	0.369756	1	1	0.116418	0.285966	0.47131	0.128902	1	1	1	1	1	0.705654	1	1	0.658196	0.699392	0.682461	0.833937	1	0.183265	0.277575	1	0.521832	1	1	1	1	0.166173	0.77554	1.00086	1	1	1.00086	1.00086	1	0.864135	0.807191	0.791967	1
Node 72	0.0741608	1.0545	1	0.709829	0.946481	0.957828	0.409959	0.510788	0.286961	0.86517	0.939062	0.106216	0.8519	0.995177	0.942547	0.993412	0.941753	0.691538	1	1	0.487659	1	0.804916	0.975197	0.722744	0.99613	0.621829	0.998742	0.979859	0.978882	0.990372	1	0.238227	0.664303	1.00004	1	0.790746	0.906025	1	1.0545	0.413512	0.957104	1.0545	1.0545	0.914544	0.998787	1	0.999869	0.984903
Node 73	0.174499	1.15036	1	0.974163	0.991002	0.999977	0.960173	0.99061	0.732571	0.996091	0.997374	0.757373	0.999777	0.999994	0.999999	0.999998	0.844694	0.993623	1.00001	1	0.992271	1	3.17695e-40	3.93526e-23	0.999448	1	0.964176	1	0.998803	0.997513	1	0.877779	0.985494	0.871888	1.00073	0.951391	0.561917	0.904261	1	1.15036	1	1	1.15036	1.15036	0.99123	1	1	1	0.998042
Node 74	1	1.0015	0.999296	1	0.202261	0.9895	1	1	0.241541	1	1	1	1	1	0.960438	1	1	1	1	1	1	0.998637	1	1	0.847311	0.993048	0.865779	0.984021	1	1	0.920485	1	0.725167	1	1	1	1	1	0.991615	1.0015	1	1	1.0015	1.0015	1	0.564302	0.999993	0.935988	1
Node 75	0.0666704	1.00107	0.86425	1	1	0.784089	1	1	1	1	1	1	0.143354	0.397268	0.900384	1	0.240101	1	1	1	1	0.941376	1	0.330337	1	0.197444	0.761675	0.991184	0.114532	1	0.455406	1	0.602416	1	1	1	1	1	0.989069	1.00107	0.715546	1	1.00107	1.00107	1	0.917542	0.97563	1	0.535181
Node 76	0.810001	1.0015	0.992039	1	0.202261	0.736164	1	1	0.637685	1	1	1	1	0.59005	0.511983	0.324166	1	0.574224	1	1	1	0.889817	1	0.510632	0.847311	0.786429	0.553314	0.732345	1	1	1	1	1	0.126296	1	1	1	1	0.999225	1.0015	0.828039	1	1.0015	1.0015	1	0.96964	0.952239	1	1
Node 77	1	1.00021	0.866152	1	1	1	1	1	0.134921	1	1	1	1	0.264264	1	1	1	1	1	1	1	0.916559	1	0.232518	1	0.507937	1	1	1	1	0.47619	1	1	1	1	1	1	1	0.772415	1.00021	0.222222	1	1.00021	1.00021	1	0.39275	0.947876	1	1
Node 78	1	1.00021	0.866152	1	1	0.478121	1	1	1	1	1	1	1	1	1	1	1	1	1	1	1	0.916559	1	1	1	0.507937	1	1	1	1	0.47619	1	1	1	1	1	1	1	0.772415	1.00021	1	1	1.00021	1.00021	1	0.39275	0.947876	1	1
Node 79	0.114781	1.00064	0.649739	1	1	0.109222	1	1	1	1	1	1	1	0.018422	0.308473	0.0722364	1	0.036435	1	1	1	0.769939	1	1	1	0.511906	1	0.228611	0.0703692	1	0.464305	1	1	1	1	1	1	1	0.460755	1.00064	0.126138	0.408313	1.00064	1.00064	1	1	0.851608	1	0.368437
Node 8	0.989329	1.01829	1	0.711758	0.746998	0.979705	0.989722	0.857866	0.22262	0.418529	0.272935	0.102518	0.245855	0.997233	0.991547	0.826357	0.458075	0.997381	1	0.149402	0.127719	1	0.989333	0.999976	0.6962	0.999905	0.971421	0.999997	0.598041	0.591957	0.998266	0.250156	0.849019	0.47355	1	1	1	0.890175	0.999999	1.01829	0.999782	0.34995	1.01829	1.01829	0.165481	0.876852	1	0.0954662	0.919285
Node 80	1	1.00237	0.95164	0.389043	1	0.991397	0.0379378	2.36571e-05	1	0.719322	1	1	0.288677	0.588288	0.835238	0.561907	1	1	1	1	1	0.990189	1	1	0.00522391	0.896897	0.801681	0.778594	0.234925	0.427156	0.435721	1	0.868744	1	1	0.053005	1	1	0.918369	1.00237	0.739292	1	1.00237	1.00237	0.171552	0.871437	0.998223	0.916321	0.814853
Node 81	0.810001	1.0015	0.944887	1	1	0.921995	0.569249	0.0263018	1	1	1	1	1	0.59005	0.960438	0.716103	1	1	1	1	1	0.998637	1	0.843367	0.213589	0.993048	0.865779	0.998675	1	1	0.732714	1	1	1	1	1	0.00296555	1	0.80157	1.0015	0.828039	1	1.0015	1.0015	0.112825	0.564302	0.995813	1	1
Node 82	0.828692	1.00302	0.893777	0.465976	1	0.737143	0.498725	1	0.868944	0.189864	1	1	1	0.528492	0.418748	0.91957	0.536784	0.016164	1	1	1	0.89463	1	0.975544	0.876284	0.229498	0.256025	0.52173	0.288887	0.508024	0.327167	1	0.198618	1	1	1	1	1	0.80435	1.00302	0.631857	0.0157858	1.00302	1.00302	1	0.864454	0.966783	0.284866	0.319213
Node 83	0.906831	1.00215	0.994038	1	1	0.568251	0.947985	0.655664	1	0.298754	1	1	1	0.0956723	0.538418	0.218656	0.422729	0.321344	1	1	1	0.993322	1	0.929302	0.931832	0.642565	0.754582	0.411487	1	1	0.984394	1	1	1	1	1	1	0.365313	0.825925	1.00215	0.91921	0.493715	1.00215	1.00215	1	0.993224	0.987226	0.680107	1
Node 84	1	1.00194	0.655948	1	1	0.212541	0.93007	0.616883	1	0.646298	0.322211	0.118313	1	0.193179	0.439963	0.0458708	0.39009	0.0134681	1	1	1	0.966884	1	1	0.910803	0.269572	1	0.253883	1	1	0.697252	1	0.810053	1	1	1	1	1	0.663334	1.00194	0.628231	0.793083	1.00194	1.00194	1	0.988828	0.923541	0.328122	0.748329
Node 85	1	1.00086	0.910806	1	1	0.280333	0.693213	1	0.440066	0.0612391	1	1	1	0.285966	0.47131	0.512886	0.197186	0.385989	1	1	0.122658	0.962796	1	0.653181	1	0.699392	0.682461	0.495201	1	1	0.651035	1	0.521832	1	1	1	1	1	0.77554	1.00086	0.634184	0.503308	1.00086	1.00086	1	0.864135	0.807191	0.39177	1
Node 86	0.918876	1.00388	1	0.553762	1	0.998818	0.50398	1	1	0.599231	1	0.34308	1	0.970435	0.854127	0.821766	1	0.628968	1	1	0.445543	0.999996	1	0.945245	0.948044	0.958548	0.692202	0.984432	1	1	0.975126	0.060113	1	1	1	1	1	1	0.999989	1.00388	0.989252	0.957328	1.00388	1.00388	1	0.998431	1	1	0.936844
Node 87	0.850164	1.00172	0.92037	1	1	0.954305	0.647127	1	1	0.60296	1	1	0.219366	0.914328	1	1	1	1	1	1	1	0.997452	1	0.879842	1	0.968291	1	0.992992	1	1	0.953253	1	1	1	1	1	1	1	0.915051	1.00172	0.560143	0.753459	1.00172	1.00172	0.127881	0.886046	0.999573	0.790349	0.706594
Node 88	1	1.0015	0.944887	1	1	0.452201	0.873635	1	1	1	1	1	1	0.59005	0.511983	0.716103	1	0.574224	1	1	1	0.984353	1	1	1	0.786429	0.553314	0.732345	1	1	0.920485	1	0.335034	1	1	1	1	1	0.94843	1.0015	0.483548	0.0870737	1.0015	1.0015	1	0.275759	0.995813	0.935988	1
Node 89	1	1.00107	0.86425	1	1	1	0.771721	1	1	0.43849	1	0.293652	1	0.784586	0.900384	1	1	1	1	1	0.150911	0.994925	0.0249438	0.330337	1	0.822397	0.761675	0.991184	1	0.223594	1	1	1	1	1	1	1	1	0.918809	1.00107	0.308736	0.583069	1.00107	1.00107	1	0.917542	0.97563	0.85954	0.535181
Node 9	0.235417	1.00258	0.508697	0.41584	0.321313	0.154023	0.626991	1	0.824729	0.382097	1	1	0.310395	0.652484	0.47329	0.884652	0.482879	1	1	1	1	0.928008	0.478639	0.806758	0.960194	0.408731	0.348811	0.695506	1	1	0.757168	1	1	1	1	1	1	1	0.716971	1.00258	1	0.596458	1.00258	1.00258	1	0.978098	0.978321	0.581621	1
Node 90	1	1.00043	1	1	1	1	1	1	1	1	1	1	1	1	1	1	1	1	1	1	1	1	1	1	1	1	1	1	1	1	1	1	1	1	1	1	1	1	1	1.00043	1	1	1.00043	1.00043	1	1	1	1	1
[truncated: 41 more columns]
