# Supplementary material for: Conservation and Evolution of Cis-Regulatory Systems in Ascomycete Fungi
Source: PLoS Biol. 2004 Nov 9;2(12):e398. doi: 10.1371/journal.pbio.0020398 (PMC526180; doi:10.1371/journal.pbio.0020398)
Supplement: Dataset S22 — (411 KB XLS). [file pbio.0020398.sd022.xls]

## Sheet: Sklu_newYCHG_2X500bp-probs
UID	ABF1	ACE2	ADR1	AFT1	ARO80	ASH1	AZF1	BAS1	YAP1	CAT8	CBF1	CHA4	CRZ1	CUP2	DAL80	GATA	ECM22	FKH1	FLO8	FZF1	GAL4	GAT1	GATGAG1	GATGAG2	GCN4	GCR1	GLN3	GZF3	HAC1	HAP1	HAP4	HCM1	HSF1	IME1	INO2/4	LEU3	LYS14	MAC1	MAL63	MATALPHA	MCB	MCM1	MCM1-2	MCM1-3	MET30/31	MIG1	MOT3	MSN2/4	MTsite1
Cluster_ABF1
Cluster_ACE2	1	1.00461	0.990021	1	1	0.773994	0.10459	1	1	1	0.544727	1	1	0.170338	0.730881	1	1	1	1.00461	1.00461	1	0.850042	1.00001	1	0.462829	0.84277	0.425343	0.368661	1	1	0.661938	1.00461	0.698675	1.00001	1.00461	1.00001	1	1	0.578247	1.00461	0.65506	1	1.00461	1.00461	1.00461	0.521781	0.806196	0.722499	0.361567
Cluster_adata-aAlpha	1	1.00191	0.381585	1	1	1	1	1	1	1	1	1	1	0.0343307	1	1	1	1	1.00191	1.00191	1	0.544285	1	1	1	0.367792	1	0.539472	1	1	0.403996	1.00191	1	1	1.00191	1	1	1	0.945154	1.00191	0.357811	0.136914	1.00191	1.00191	1.00191	0.533051	0.703334	1	1
Cluster_adata-ARG3	0.567345	1.00577	0.73953	1	1	0.420749	0.511757	0.15409	0.163854	1	1	1	1	0.621639	0.469392	0.294123	1	1	1.00577	1.00577	1	0.160644	1.00002	0.621639	0.0364104	0.76546	1	0.00836402	1	1	0.808602	1.00577	0.0137372	1.00002	1.00577	1.00002	1	1	0.0595467	1.00577	1	1	1.00577	1.00577	1.00577	0.647256	0.347196	1	1
Cluster_adata-CalciumSpecific	0.673128	1.00771	0.735658	1	1	0.952736	1	0.200156	1	1	0.731125	1	1	1	0.628309	0.371783	1	0.10193	1.00771	1.00771	1	0.930528	1.00003	0.726693	0.645612	0.776729	0.603371	0.849742	1	1	0.653854	1.00771	0.330052	0.0076586	1.00771	1.00003	1	1	0.757825	1.00771	0.515221	1	1.00771	1.00771	1.00771	0.796769	0.243682	0.882346	1
Cluster_adata-Chaperones	0.00402433	1.00499	0.307083	1	1	0.310124	1	1	1	1	0.00706476	1	1	0.193448	0.758834	0.260481	1	1	1.00499	1.00499	1	0.20513	1.00001	1	1	0.668841	1	0.241149	1	1	0.71824	1.00499	9.68675e-06	1.00001	1.00499	1.00001	1	1	0.494918	1.00499	1	0.318473	1.00499	1.00499	1.00499	0.566737	0.780621	0.750685	0.385059
Cluster_adata-EGT2	0.488217	1.00461	0.956338	1	1	0.0290091	0.436291	1	1	0.157153	0.173653	0.0879983	1	0.540246	0.730881	1	1	0.0623749	1.00461	1.00461	1	0.593	1.00001	1	1	0.968733	0.425343	0.946533	1	1	0.661938	1.00461	0.921603	1.00001	1.00461	1.00001	0.157153	1	0.147748	1.00461	0.65506	1	1.00461	1.00461	1.00461	0.521781	0.429218	0.722499	1
Cluster_adata-ENA1	1	1.00076	0.680365	1	1	1	1	1	1	1	1	1	1	1	1	1	1	1	1.00076	1.00076	1	0.784142	1	1	1	0.438001	1	0.55581	1	1	1	1.00076	1	1	1.00076	1	1	1	0.42011	1.00076	0.162256	1	1.00076	1.00076	1.00076	0.262453	0.868762	0.192025	1
Cluster_adata-ERD2	1	1.00268	0.645989	1	1	0.821946	1	1	1	1	1	1	1	0.36418	1	1	1	1	1.00268	1.00268	1	0.426586	1	0.36418	0.303822	0.867229	1	0.429649	1	1	0.0875166	1.00268	0.0281384	1	1.00268	1	1	1	0.797502	1.00268	0.462201	0.186343	1.00268	1.00268	1.00268	1	0.610859	1	0.230111
Cluster_adata-G1DNAreplication	1	1.00153	0.981424	1	1	0.626731	1	0.0435533	1	1	1	1	1	0.227878	1	1	1	1	1.00153	1.00153	1	0.614758	1	1	0.186835	0.684318	1	0.407634	1	1	0.712278	1.00153	0.166664	1	1.00153	1	1	0.0106463	0.176346	1.00153	1	1	1.00153	1.00153	1.00153	0.456161	0.974877	0.347289	1
Cluster_adata-OAC1	1	1.00153	0.462747	1	1	0.626731	1	1	1	1	1	1	1	1	1	1	1	1	1.00153	1.00153	1	0.614758	1	1	0.186835	0.00389729	1	0.802846	1	1	1	1.00153	1	1	1.00153	1	1	1	0.176346	1.00153	1	0.111099	1.00153	1.00153	1.00153	1	0.974877	1	1
Cluster_adata-Respiration	0.356688	1.00889	0.623586	1	1	0.585852	1	1	1	0.279917	0.00240955	1	1	0.427013	1	1	1	1	1.00889	1.00889	1	0.241288	1.00004	1	0.696894	0.0959379	1	0.974087	1	0.0845069	0.42074	1.00889	0.992488	1.00004	1.00889	1.00004	1	1	0.126183	1.00889	0.870565	0.493221	1.00889	1.00889	1.00889	0.411935	0.934013	0.914779	0.577655
Cluster_adata-RET3	0.723813	1.00889	0.407882	1	1	0.906733	1	1	1	1	0.779407	1	1	0.775218	0.208529	0.414279	1	1	1.00889	1.00889	1	0.500099	1.00004	1	1	0.347076	0.0817973	0.348645	1	1	0.778018	1.00889	0.66527	1.00004	1.00889	1.00004	1	1	0.406038	1.00889	0.592528	0.493221	1.00889	1.00889	1.00889	1	0.196982	0.692234	0.577655
Cluster_adata-Secretion	0.316221	1.0081	0.0172477	1	1	0.704555	1	1	1	0.258972	0.748285	1	1	0.382039	0.165032	0.0819478	0.113959	1	1.0081	1.0081	1	0.288058	1.00003	1	0.28591	0.634486	0.243492	0.239477	1	1	0.0319821	1.0081	0.197104	1.00003	1.0081	1.00003	1	1	0.989001	1.0081	0.26047	0.462236	1.0081	1.0081	1.0081	0.0642012	0.832929	0.642606	0.544643
Cluster_adata-TRP4	1	1.00268	0.259406	1	1	0.180534	1	0.0750104	1	1	0.367798	1	1	0.36418	0.534624	0.14981	1	1	1.00268	1.00268	1	0.426586	1	1	0.303822	0.556005	1	0.429649	1	1	0.597772	1.00268	0.397811	1	1.00268	1	1	1	0.797502	1.00268	1	1	1.00268	1.00268	1.00268	0.258747	0.991206	1	1
Cluster_adata-TUB	0.284327	1.0023	0.314632	1	1	1	1	1	1	1	0.324946	1	1	0.321636	1	1	1	1	1.0023	1.0023	1	0.481867	1	1	1	0.822768	1	0.91256	1	1	0.50711	1.0023	0.71955	1	1.0023	1	1	1	0.315494	1.0023	0.0853231	0.161988	1.0023	1.0023	1.0023	0.202831	0.655477	0.472807	1
Cluster_ADR1	1	1.00461	0.990021	1	1	0.948259	1	1	1	1	1	1	1	0.0348156	0.356714	0.0293531	1	1	1.00461	1.00461	1	0.593	1.00001	1	0.119455	0.84277	1	0.368661	1	1	0.872086	1.00461	0.698675	1.00001	1.00461	1.00001	1	1	0.147748	1.00461	0.65506	1	1.00461	1.00461	1.00461	0.521781	0.429218	1	1
Cluster_ARG80	0.427643	1.00384	0.751517	1	1	0.915148	0.0757233	0.105467	1	0.132743	0.480794	1	1	0.476541	0.277027	0.0206093	1	1	1.00384	1.00384	1	0.29588	1.00001	0.125858	0.0869086	0.224459	1	0.212997	1	0.0375684	0.52634	1.00384	0.880057	1.00001	1.00384	1.00001	1	1	0.903375	1.00384	0.587959	1	1.00384	1.00384	1.00384	0.42303	0.855842	1	0.311888
Cluster_ARG81	1	1.00268	0.259406	1	1	0.472985	0.0387023	0.0750104	1	1	0.367798	1	1	1	0.534624	0.14981	1	1	1.00268	1.00268	1	0.426586	1	1	0.044753	0.0705563	1	0.429649	1	1	0.597772	1.00268	1	1	1.00268	1	1	1	0.797502	1.00268	1	1	1.00268	1.00268	1.00268	0.655819	0.610859	1	1
Cluster_Arginine	1	1.00384	0.145311	1	1	0.67723	0.0757233	0.105467	1	1	0.480794	1	1	1	0.664922	1	1	1	1.00384	1.00384	1	0.29588	1.00001	0.476541	0.0869086	0.475411	1	0.896546	1	1	0.0997723	1.00384	0.880057	1.00001	1.00384	1.00001	1	1	0.0837805	1.00384	0.587959	0.255295	1.00384	1.00384	1.00384	0.42303	0.494333	0.656251	1
Cluster_ARO80	1	1.00306	0.213856	1	1	1	0.317399	1	1	1	0.407946	0.00150735	1	0.404071	0.582871	0.169324	1	1	1.00306	1.00306	1	0.377628	1	0.404071	1	0.322052	1	0.258649	1	1	0.675259	1.00306	0.81656	1	1.00306	1	1	1	0.0309947	1.00306	1	0.21	1.00306	1.00306	1.00306	0.314799	0.569263	1	1
Cluster_ASH1	0.59092	1.00616	0.449991	1	1	0.894331	1	1	1	1	1	1	1	0.64545	0.225008	0.310375	1	1	1.00616	1.00616	1	0.898961	1.00002	1	0.563618	0.804437	0.522515	0.661871	1	1	0.433189	1.00616	0.839457	1.00002	1.00616	1.00002	1	1	0.28345	1.00616	0.0404743	0.376357	1.00616	1.00616	1.00616	0.17953	0.702918	0.491868	1
Cluster_Asparagine	0.32319	1.00268	0.645989	1	1	0.472985	1	1	1	1	1	1	1	0.36418	1	1	1	1	1.00268	1.00268	1	0.426586	1	1	0.303822	0.556005	1	0.429649	1	1	0.280456	1.00268	0.773174	1	1.00268	1	1	1	0.943446	1.00268	1	1	1.00268	1.00268	1.00268	1	0.610859	0.152258	1
Cluster_Autophagy
Cluster_AZF1	0.542421	1.00538	0.544946	1	1	0.968463	0.487787	0.00990841	1	1	1	1	1	1	0.783894	1	1	1	1.00538	1.00538	1	0.789937	1.00001	1	0.0302157	0.720386	1	0.0572475	1	1	0.922238	1.00538	0.778683	1.00001	1.00538	1.00001	0.180894	1	0.635395	1.00538	0.711275	0.338334	1.00538	1.00538	1.00538	0.123338	0.987993	0.421355	0.407695
Cluster_BAS1	0.0816974	1.00345	0.514385	1	1	0.11128	0.349269	0.00405659	1	1	0.445558	1	1	1	0.626132	1	1	1	1.00345	1.00345	1	0.334272	1.00001	1	0.00838714	0.700808	1	0.974211	1	1	0.199479	1.00345	0.53575	1.00001	1.00345	1.00001	1	1	0.825659	1.00345	1	0.232977	1.00345	1.00345	1.00345	1	0.530484	1	1
Cluster_Biotin	1	1.00076	0.680365	1	1	0.388912	1	1	1	1	1	1	1	1	1	1	1	1	1.00076	1.00076	1	0.784142	1	1	1	1	1	0.55581	1	1	1	1.00076	1	1	1.00076	1	1	1	0.876342	1.00076	1	1	1.00076	1.00076	1.00076	1	0.868762	1	1
Cluster_CAD1	1	1.00345	0.514385	1	1	0.891356	1	1	1	1	0.445558	1	1	1	0.626132	1	1	1	1.00345	1.00345	1	0.724473	1.00001	0.441473	1	0.400126	0.33982	0.349849	1	1	0.93956	1.00345	0.0735944	1.00001	1.00345	1.00001	0.120281	1	0.825659	1.00345	0.549686	0.0261801	1.00345	1.00345	1.00345	0.369837	0.879493	0.228847	0.285632
Cluster_CBF1	1	1.00306	0.963994	1	1	0.549212	1	0.0852724	1	0.107646	0.407946	1	1	0.0849444	1	1	1	1	1.00306	1.00306	1	0.946342	1	1	0.00036763	0.900548	1	0.961249	1	0.030158	1	1.00306	1	1	1.00306	1	1	1	0.974199	1.00306	0.507875	0.21	1.00306	1.00306	1.00306	0.314799	0.902034	0.574261	1
Cluster_CHA4	1	1.00577	0.4963	1	1	0.975382	0.152206	1	1	0.192519	0.244989	1	1	0.240645	0.469392	1	1	1	1.00577	1.00577	1	0.473993	1.00002	0.621639	0.0364104	0.314145	0.499869	0.596755	1	1	0.600448	1.00577	0.140651	1.00002	1.00577	1.00002	1	1	0.346047	1.00577	0.735861	0.0682869	1.00577	1.00577	1.00577	0.647256	0.347196	0.798785	0.429506
Cluster_CIN5	1	1.00928	0.888732	1	1	0.626793	0.097799	1	1	1	0.793502	0.168607	1	0.789407	0.458625	1	0.129212	0.121121	1.00928	1.00928	0.0182335	0.868837	1.00004	0.448859	0.712294	0.0542168	0.294513	0.405795	1	1	0.994587	1.00928	0.301178	1.00004	1.00928	1.00004	0.044047	1	0.0399387	1.00928	0.881625	0.508046	1.00928	1.00928	1.00928	0.445615	0.77972	0.219328	0.593262
Cluster_CRZ1	1	1.00191	0.787394	1	1	0.300388	0.212201	1	1	1	1	1	1	1	0.0862993	0.109418	1	1	1.00191	1.00191	1	0.544285	1	1	1	0.367792	0.205871	0.0451732	1	1	0.789348	1.00191	0.653281	1	1.00191	1	1	1	0.114217	1.00191	0.357811	1	1.00191	1.00191	1.00191	1	0.703334	0.0829119	1
Cluster_CUP9	1	1.00345	0.514385	0.0204461	1	0.891356	1	1	1	1	0.445558	0.0667156	1	0.441473	0.23678	0.188398	1	1	1.00345	1.00345	1	0.334272	1.00001	1	0.37237	0.700808	0.33982	0.0422267	1	1	0.93956	1.00345	0.851662	1.00001	1.00345	1.00001	1	1	0.604532	1.00345	1	0.0261801	1.00345	1.00345	1.00345	0.0274389	0.530484	0.617438	1
Cluster_DAL81	1	1.00499	0.595482	1	1	0.564229	0.119974	1	0.143612	1	0.573694	1	1	1	0.143744	0.0341861	1	1	1.00499	1.00499	1	0.947907	1.00001	1	0.136696	0.206278	1	0.448356	1	1	0.251479	1.00499	0.22444	1.00001	1.00499	1.00001	1	1	0.711573	1.00499	1	1	1.00499	1.00499	1.00499	0.026577	0.399935	1	1
Cluster_DAL82	1	1.00616	0.449991	1	1	0.712394	1	1	1	0.203984	1	1	1	1	0.504305	0.310375	1	1	1.00616	1.00616	1	0.898961	1.00002	0.64545	1	0.18978	0.522515	0.835113	1	0.0594949	0.6562	1.00616	0.966544	1.00002	1.00616	1.00002	1	1	0.28345	1.00616	0.758363	0.376357	1.00616	1.00616	1.00616	0.682854	0.702918	0.491868	1
Cluster_DIG1	0.427643	1.00384	0.751517	1	1	0.67723	0.00928601	1	1	0.132743	0.480794	1	1	1	0.277027	1	1	1	1.00384	1.00384	1	0.679806	1.00001	0.476541	1	0.224459	0.0714002	0.701604	1	1	0.52634	1.00384	0.880057	1.00001	1.00384	1.00001	0.132743	1	0.257312	1.00384	0.587959	1	1.00384	1.00384	1.00384	0.782301	0.494333	0.656251	1
Cluster_DOT6	1	1.00889	0.407882	1	1	0.906733	0.290784	0.226622	1	1	0.779407	0.162157	1	0.170719	0.919656	1	1	1	1.00889	1.00889	1	0.500099	1.00004	0.775218	0.106084	0.864829	1	0.520093	1	1	0.42074	1.00889	0.843758	1.00004	1.00889	1.00004	1	1	0.126183	1.00889	0.870565	1	1.00889	1.00889	1.00889	0.856842	0.983161	0.415457	0.577655
Cluster_DrugResistance	1	1.00191	0.787394	1	1	1	1	1	1	1	1	1	1	1	1	1	1	1	1.00191	1.00191	1	0.896649	1	0.276264	1	0.103616	1	0.86869	1	1	0.789348	1.00191	1	1	1.00191	1	1	1	0.424861	1.00191	1	1	1.00191	1.00191	1.00191	0.533051	0.703334	0.413383	1
Cluster_Endocytosis	1	1.00384	0.455102	1	0.0114067	0.00984174	1	1	1	1	1	1	1	1	0.664922	1	1	1	1.00384	1.00384	1	0.679806	1.00001	1	1	0.0780706	0.369644	0.441084	1	1	0.265951	1.00384	0.880057	1.00001	1.00384	1.00001	1	1	0.747943	1.00384	0.587959	1	1.00384	1.00384	1.00384	0.782301	0.494333	0.268123	1
Cluster_FattyAcid	0.275224	1.00732	0.56751	1	1	0.402493	1	1	1	0.237435	0.341109	1	1	0.335651	0.599721	0.356955	1	1	1.00732	1.00732	1	0.626796	1.00003	0.708308	0.626673	0.536124	1	0.279131	1	1	0.224967	1.00732	0.902632	1.00003	1.00732	1.00003	0.237435	1	0.0566777	1.00732	0.487392	0.429383	1.00732	1.00732	1.00732	0.275584	0.865924	0.000275435	1
Cluster_FHL1	0.347861	1.02165	0.354493	1	1	0.937249	1	1	0.136757	0.181255	0.873602	0.346697	1	0.869094	0.687067	0.723946	1	1	1.02165	1.02165	1	0.555897	1.00022	0.972462	0.774839	0.192977	0.23338	0.363733	0.100683	0.191396	0.8385	1.02165	0.851408	1.00022	1.02165	1.00022	1	1	0.30266	1.02165	0.17948	0.212511	1.02165	1.02165	1.02165	0.240814	0.266385	0.000791358	1
Cluster_FKH1	1	1.00191	0.787394	1	1	0.708317	0.0195934	1	1	1	1	1	1	1	0.420821	1	1	1	1.00191	1.00191	1	0.544285	1	1	1	0.103616	0.205871	0.86869	1	1	0.789348	1.00191	1	1	1.00191	1	1	1	0.945154	1.00191	0.357811	1	1.00191	1.00191	1.00191	0.533051	0.703334	0.413383	0.170324
Cluster_FKH2	1	1.00538	0.26744	1	0.015945	0.365563	0.487787	0.144574	1	1	0.600829	1	1	1	1	1	1	0.0724125	1.00538	1.00538	1	0.789937	1.00001	1	0.0302157	0.258886	1	0.895469	1	1	0.311019	1.00538	0.0351271	1.00001	1.00538	1.00001	1	1	0.416876	1.00538	0.108848	1	1.00538	1.00538	1.00538	0.881905	0.372638	0.421355	0.407695
Cluster_Flavin	1	1.00153	0.856264	1	1	0.626731	1	1	1	1	1	0.0301922	1	1	1	1	1	1	1.00153	1.00153	1	0.994561	1	1	0.186835	0.262121	1	0.802846	1	1	0.712278	1.00153	1	1	1.00153	1	1	1	0.176346	1.00153	1	1	1.00153	1.00153	1.00153	1	0.754663	1	1
Cluster_Flocculation	1	1.00038	0.824876	1	1	1	1	1	1	1	1	1	1	1	1	1	1	1	1.00038	1.00038	1	0.88554	1	0.0625715	1	1	1	1	1	1	1	1.00038	1	1	1.00038	1	1	1	1	1.00038	1	1	1.00038	1.00038	1.00038	1	0.932087	0.101106	1
Cluster_FZF1	1	1.00153	0.856264	1	1	0.209312	0.17368	1	1	1	1	1	1	1	0.353917	0.0885205	1	1	1.00153	1.00153	1	0.614758	1	1	1	0.684318	1	0.111054	1	1	1	1.00153	0.571392	1	1.00153	1	1	1	0.984752	1.00153	1	1	1.00153	1.00153	1.00153	1	0.754663	1	1
Cluster_GAL4	1	1.00191	0.381585	1	1	0.708317	1	1	1	1	1	0.0376038	1	0.276264	1	1	1	1	1.00191	1.00191	1	0.896649	1	1	1	0.367792	1	0.86869	1	1	0.789348	1.00191	1	1	1.00191	1	0.0686698	1	0.424861	1.00191	1	1	1.00191	1.00191	1.00191	0.533051	0.703334	0.413383	1
Cluster_Galactose	1	1.00038	0.824876	1	1	0.218237	1	1	1	1	1	1	1	1	1	1	1	1	1.00038	1.00038	1	0.88554	1	1	1	0.250286	1	1	1	1	1	1.00038	1	1	1.00038	1	0.0141167	1	0.648226	1.00038	1	1	1.00038	1.00038	1.00038	0.141167	0.932087	1	1
Cluster_GAT1	1	1.00345	0.17629	1	1	0.617325	1	0.0954243	1	1	1	1	1	1	0.626132	1	0.0504188	1	1.00345	1.00345	1	0.986726	1.00001	0.441473	0.37237	0.400126	0.33982	0.623448	1	1	0.199479	1.00345	0.53575	1.00001	1.00345	1.00001	1	1	0.94542	1.00345	1	1	1.00345	1.00345	1.00345	0.746374	0.879493	0.0541554	1
Cluster_GAT3	1	1.00153	0.856264	1	1	0.209312	1	1	0.0465036	1	1	1	1	1	0.353917	1	1	1	1.00153	1.00153	1	0.614758	1	1	1	0.684318	0.168373	0.407634	1	1	1	1.00153	0.571392	1	1.00153	1	1	1	0.984752	1.00153	1	1	1.00153	1.00153	1.00153	1	0.754663	1	1
Cluster_GCN4	0.275224	1.00732	0.771293	1	1	0.21856	0.220494	0.191141	0.202958	1	0.114708	1	1	0.708308	0.312763	0.356955	1	1	1.00732	1.00732	1	0.342162	1.00003	0.708308	0.067034	0.536124	1	0.064221	1	1	0.224967	1.00732	0.289003	1.00003	1.00732	1.00003	1	1	0.290386	1.00732	0.487392	1	1.00732	1.00732	1.00732	0.275584	0.96436	1	0.151905
Cluster_GCR1	0.359956	1.00306	0.578256	1	1	0.860908	0.050056	1	1	1	1	1	1	1	0.582871	1	1	1	1.00306	1.00306	1	0.377628	1	1	1	0.113881	0.308597	0.258649	1	1	0.365308	1.00306	0.0479338	1	1.00306	1	1	1	0.166111	1.00306	1	1	1.00306	1.00306	1.00306	0.314799	0.569263	0.574261	1
Cluster_GCR2	0.359956	1.00306	0.213856	1	1	1	0.317399	1	1	1	1	1	1	1	1	1	1	1	1.00306	1.00306	1	0.76929	1	1	1	0.63399	1	0.805533	1	1	0.365308	1.00306	0.182846	1	1.00306	1	1	1	0.423374	1.00306	0.507875	1	1.00306	1.00306	1.00306	0.314799	0.569263	1	0.258386
Cluster_GeneralTFs	0.06059	1.00655	0.995371	1	1	0.913281	1	1	1	1	0.293256	1	1	0.667771	0.537699	0.326259	1	1	1.00655	1.00655	1	0.404079	1.00002	0.288314	1	0.950665	0.544144	0.00182253	1	1	0.289983	1.00655	0.972966	1.00002	1.00655	1.00002	0.21529	1	0.987706	1.00655	0.778955	1	1.00655	1.00655	1.00655	1	0.677136	1	0.126529
Cluster_GLN3	1	1.00461	0.647304	1	1	0.948259	1	1	0.133314	1	1	1	1	1	0.356714	1	1	1	1.00461	1.00461	1	0.593	1.00001	1	1	0.968733	0.425343	0.368661	1	1	0.872086	1.00461	1	1.00001	1.00461	1.00001	0.157153	1	0.78383	1.00461	0.270252	1	1.00461	1.00461	1.00461	0.839639	0.806196	1	1
Cluster_Glutamate	1	1.00115	0.918844	1	1	0.522376	0.133291	0.0328399	1	1	1	1	1	1	1	1	1	1	1.00115	1.00115	1	0.963785	1	1	0.143658	1	1	0.704043	1	1	0.607065	1.00115	0.47021	1	1.00115	1	1	1	0.272213	1.00115	1	1	1.00115	1.00115	1.00115	1	0.809717	1	1
Cluster_Glutathione	1	1.00115	0.994658	1	1	0.522376	1	1	1	1	1	1	1	1	1	1	1	1	1.00115	1.00115	1	0.694321	1	1	1	1	1	0.0369946	1	1	1	1.00115	0.0951819	1	1.00115	1	1	1	0.272213	1.00115	1	1	1.00115	1.00115	1.00115	1	0.809717	1	1
Cluster_Glycerol	1	1.00076	0.680365	1	1	0.388912	1	1	1	1	1	1	1	1	1	1	1	1	1.00076	1.00076	1	0.784142	1	1	1	1	1	0.55581	1	1	1	1.00076	1	1	1.00076	1	1	1	0.876342	1.00076	1	1	1.00076	1.00076	1.00076	0.262453	0.868762	0.192025	1
Cluster_Glycogen	1	1.00153	0.462747	1	1	1	0.17368	1	1	1	1	1	1	1	1	1	1	1	1.00153	1.00153	1	0.93301	1	0.227878	1	1	1	0.111054	1	1	0.712278	1.00153	0.166664	1	1.00153	1	1	1	0.176346	1.00153	1	1	1.00153	1.00153	1.00153	1	0.754663	0.0532496	1
Cluster_GTS1	0.516072	1.00499	0.0813391	1	1	0.812133	1	1	1	0.169106	1	1	1	1	0.758834	1	1	1	1.00499	1.00499	1	0.551604	1.00001	0.569146	1	0.416709	1	0.678454	1	0.0485885	0.251479	1.00499	0.0834071	1.00001	1.00499	1.00001	1	1	0.711573	1.00499	1	1	1.00499	1.00499	1.00499	0.566737	0.399935	0.750685	1
Cluster_HAL9	0.458771	1.00422	0.889867	1	1	0.933737	0.408649	0.115403	1	1	1	1	1	0.50942	1	1	1	1	1.00422	1.00422	1	0.261883	1.00001	0.50942	0.102822	0.114626	1	0.925399	1	1	0.967653	1.00422	1	1.00001	1.00422	1.00001	0.145033	1	0.663907	1.00422	1	0.0385287	1.00422	1.00422	1.00422	0.813151	0.460633	0.691139	1
Cluster_HAP2	0.542421	1.00538	0.0670236	1	1	0.0634727	1	1	1	0.180894	0.220946	1	1	0.596239	0.783894	1	1	1	1.00538	1.00538	1	0.181534	1.00001	1	0.515819	0.900062	1	0.895469	1	0.0522365	0.144306	1.00538	0.517089	1.00001	1.00538	1.00001	1	1	0.416876	1.00538	1	0.338334	1.00538	1.00538	1.00538	0.608567	0.754785	1	1
Cluster_HAP3	0.613219	1.00655	0.653736	1	1	0.526616	0.55641	1	1	0.21529	0.293256	1	1	0.288314	1	1	1	1	1.00655	1.00655	1	0.963176	1.00002	1	1	0.837815	1	0.990554	1	0.0631053	0.289983	1.00655	0.412337	1.00002	1.00655	1.00002	0.21529	1	0.783303	1.00655	0.169265	1	1.00655	1.00655	1.00655	0.438296	0.677136	1	0.470771
Cluster_HAP4	1	1.00655	0.837477	1	1	0.752204	0.55641	1	1	1	0.0192764	1	1	0.0856883	1	1	1	1	1.00655	1.00655	1	0.404079	1.00002	1	1	0.648671	1	0.956441	1	1	0.492859	1.00655	0.863801	1.00002	1.00655	1.00002	1	1	0.898535	1.00655	0.428883	0.394552	1.00655	1.00655	1.00655	0.925403	0.97567	1	1
Cluster_HAP5	0.59092	1.00616	0.201122	1	1	0.712394	0.534614	1	1	1	0.269128	1	1	0.264476	0.826495	0.310375	1	1	1.00616	1.00616	1	0.898961	1.00002	0.64545	1	0.804437	1	0.453501	1	1	0.843772	1.00616	0.613722	1.00002	1.00616	1.00002	0.203984	1	0.483763	1.00616	0.758363	1	1.00616	1.00616	1.00616	0.17953	0.702918	1	1
Cluster_Heme	1	1.00191	0.787394	1	1	0.708317	0.212201	1	0.0577984	1	1	1	1	0.276264	0.420821	1	1	1	1.00191	1.00191	1	0.544285	1	1	1	0.76345	0.205871	0.86869	1	1	0.12257	1.00191	1	1	1.00191	1	1	1	0.945154	1.00191	1	1	1.00191	1.00191	1.00191	1	0.959983	1	0.0123527
Cluster_HIR1	1	1.00268	0.645989	1	1	0.0446762	1	1	1	1	1	1	1	1	1	1	1	1	1.00268	1.00268	1	0.813553	1	1	1	0.556005	1	0.429649	1	1	0.280456	1.00268	1	1	1.00268	1	1	1	0.528163	1.00268	0.112957	1	1.00268	1.00268	1.00268	0.655819	0.610859	0.526232	1
Cluster_HIR2	1	1.00268	0.259406	1	1	0.180534	0.283981	1	1	1	1	1	1	1	1	1	1	1	1.00268	1.00268	1	0.813553	1	0.36418	1	1	1	0.737212	1	1	0.887133	1.00268	0.773174	1	1.00268	1	1	1	0.230427	1.00268	0.462201	1	1.00268	1.00268	1.00268	1	0.610859	0.526232	1
Cluster_Histidine	1	1.00191	0.787394	1	1	0.300388	0.212201	1	1	1	1	1	1	1	0.420821	0.109418	1	1	1.00191	1.00191	1	0.544285	1	0.276264	1	0.367792	1	0.539472	1	1	1	1.00191	1	1	1.00191	1	1	1	0.762246	1.00191	0.357811	1	1.00191	1.00191	1.00191	1	0.959983	1	1
Cluster_HMS1	1	1.00306	0.578256	1	1	0.860908	1	1	0.0909112	1	0.407946	0.0595171	1	0.404071	0.582871	1	1	1	1.00306	1.00306	1	0.377628	1	1	1	0.900548	1	0.258649	1	1	0.917401	1.00306	0.469466	1	1.00306	1	1	1	0.702811	1.00306	0.507875	1	1.00306	1.00306	1.00306	0.0905912	0.569263	0.574261	1
Cluster_HSF1	1	1.00422	0.699636	1	0.0125426	0.72926	1	0.115403	1	1	0.028228	1	1	0.50942	0.6997	0.225263	1	1	1.00422	1.00422	1	0.971114	1.00001	1	0.434214	0.287221	1	0.288997	1	1	0.967653	1.00422	0.00143012	1.00001	1.00422	1.00001	1	1	0.848786	1.00422	1	1	1.00422	1.00422	1.00422	0.473804	0.966123	1	1
Cluster_IME4	1	1.00268	0.259406	1	1	0.180534	1	1	1	1	0.367798	1	1	1	1	1	1	1	1.00268	1.00268	1	0.426586	1	1	1	0.0705563	1	0.737212	1	1	0.280456	1.00268	0.773174	1	1.00268	1	1	1	0.797502	1.00268	0.112957	1	1.00268	1.00268	1.00268	0.655819	0.610859	0.526232	0.230111
Cluster_INO2	1	1.00422	0.699636	1	1	1	1	1	1	1	0.513804	1	1	1	0.317138	1	0.0612959	1	1.00422	1.00422	1	0.877651	1.00001	0.50942	1	0.287221	1	0.52799	1	1	0.837061	1.00422	0.903026	1.00001	1.00422	1.00001	1	0.0290436	0.663907	1.00422	1	0.276971	1.00422	1.00422	1.00422	1	0.831336	0.307367	1
Cluster_INO4	0.542421	1.00538	0.26744	1	1	1	0.487787	1	1	1	1	1	1	1	1	1	0.0773938	1	1.00538	1.00538	1	0.999596	1.00001	0.596239	1	0.479839	1	0.895469	1	1	0.539561	1.00538	1	1.00001	1.00538	1.00001	0.180894	1	0.0813066	1.00538	0.711275	0.338334	1.00538	1.00538	1.00538	0.881905	0.754785	0.00946159	1
Cluster_InvasiveGrowth	1	1.00115	0.561126	1	1	1	1	1	1	1	0.178288	1	1	1	1	1	1	1	1.00115	1.00115	1	0.963785	1	1	1	0.156465	1	1	1	1	1	1.00115	1	1	1.00115	1	1	1	0.956562	1.00115	1	1	1.00115	1.00115	1.00115	1	0.809717	1	1
Cluster_Isoleucine	0.199832	1.00153	0.462747	1	1	0.626731	1	0.0435533	1	1	0.23039	1	1	1	1	1	1	1	1.00153	1.00153	1	0.614758	1	1	0.186835	0.684318	1	1	1	1	0.712278	1.00153	0.166664	1	1.00153	0.00152701	1	1	0.871991	1.00153	1	1	1.00153	1.00153	1.00153	1	0.754663	1	1
Cluster_IXR1	1	1.00384	0.751517	1	1	1	1	1	0.112358	1	1	1	1	1	1	1	1	1	1.00384	1.00384	1	0.29588	1.00001	1	0.404088	0.475411	1	0.441084	1	1	0.955781	1.00384	0.596102	1.00001	1.00384	1.00001	1	1	0.903375	1.00384	0.587959	0.255295	1.00384	1.00384	1.00384	0.782301	0.494333	0.656251	1
Cluster_LEU3	1	1.00345	0.989037	1	1	0.617325	1	0.0954243	1	1	0.445558	1	1	1	1	1	1	1	1.00345	1.00345	1	0.334272	1.00001	1	0.0718359	0.165904	1	0.974211	1	1	0.740127	1.00345	0.851662	1.00001	1.00345	0.00343907	1	1	0.604532	1.00345	1	0.232977	1.00345	1.00345	1.00345	0.746374	0.530484	1	1
Cluster_Leucine	1	1.00115	0.918844	1	1	1	1	1	1	1	1	1	1	1	1	1	1	1	1.00115	1.00115	1	0.694321	1	1	0.143658	0.578769	1	0.704043	1	1	1	1.00115	0.47021	1	1.00115	1	1	1	1	1.00115	1	1	1.00115	1.00115	1.00115	1	0.809717	1	1
Cluster_Lysine	1	1.00268	0.645989	1	1	1	0.283981	0.0750104	1	1	1	0.0522659	1	0.0663742	1	1	1	1	1.00268	1.00268	1	0.813553	1	1	0.303822	0.556005	1	0.941785	1	1	0.280456	1.00268	0.397811	1	1.00268	1	0.0948334	1	0.797502	1.00268	1	1	1.00268	1.00268	1.00268	0.258747	0.991206	1	1
Cluster_MAC1	1	1.00268	0.645989	1	1	1	0.283981	1	1	0.0948334	1	1	1	1	0.534624	1	1	1	1.00268	1.00268	1	0.813553	1	0.36418	1	0.867229	0.27591	0.429649	1	1	0.597772	1.00268	0.773174	1	1.00268	1	1	1	0.797502	1.00268	1	1	1.00268	1.00268	1.00268	1	0.610859	1	1
Cluster_MAL13	0.193488	1.00577	0.4963	1	1	0.0869731	1	1	0.163854	0.192519	0.626246	1	1	0.0627754	0.196878	0.294123	0.00307568	1	1.00577	1.00577	1	0.97837	1.00002	0.0627754	1	0.76546	0.499869	0.596755	1	1	0.808602	1.00577	0.81124	1.00002	1.00577	1.00002	1	1	0.558532	1.00577	1	0.357623	1.00577	1.00577	1.00577	0.357089	0.728839	0.013043	0.429506
Cluster_MAL33	0.488217	1.00461	0.351452	1	1	1	1	1	1	1	1	1	1	1	0.119262	1	0.0666908	1	1.00461	1.00461	1	0.850042	1.00001	1	1	0.84277	0.0988121	0.819727	1	1	0.976341	1.00461	0.0604878	1.00001	1.00461	1.00001	1	1	0.78383	1.00461	1	0.298025	1.00461	1.00461	1.00461	0.233921	0.806196	0.722499	0.361567
Cluster_Maltose	1	1.00038	0.824876	1	1	1	1	1	1	1	1	1	1	1	1	1	1	1	1.00038	1.00038	1	1	1	1	1	1	1	1	1	1	1	1.00038	0.190767	1	1.00038	1	1	1	1	1.00038	1	1	1.00038	1.00038	1.00038	0.141167	0.932087	1	1
Cluster_ManualAFT1targets	1	1.00153	0.981424	0.00913062	1	0.00224981	1	1	1	1	1	1	1	1	0.0555125	1	1	1	1.00153	1.00153	1	0.614758	1	1	1	1	0.168373	0.407634	1	1	0.712278	1.00153	0.571392	1	1.00153	1	1	1	0.176346	1.00153	1	1	1.00153	1.00153	1.00153	1	0.754663	1	1
Cluster_ManualG1genes	0.738909	1.00928	0.372297	1	1	0.921641	1	1	1	1	0.191403	1	1	0.789407	0.726897	1	1	1	1.00928	1.00928	0.0182335	0.707904	1.00004	1	1	0.755533	0.670631	0.738326	1	1	0.299303	1.00928	0.699415	1.00004	1.00928	1.00004	0.290172	1	0.349927	1.00928	5.95891e-17	1	1.00928	1.00928	1.00928	0.679603	0.77972	0.714848	1
Cluster_ManualHAP1targets	1	1.01046	0.669301	1	1	0.954235	1	1	1	1	0.00571812	1	1	1	0.948303	1	1	1	1.01046	1.01046	1	0.167143	1.00005	0.826851	0.753988	0.934796	1	0.929267	1	1	0.987416	1.01046	0.786541	1.00005	1.01046	1.00005	1	1	0.109936	1.01046	0.680803	0.550001	1.01046	1.01046	1.01046	0.330744	0.723655	0.129928	1
Cluster_ManualMethionine	0.06059	1.00655	0.938577	1	1	0.913281	1	0.172815	0.183632	1	0.000406463	1	1	1	0.537699	1	1	1	1.00655	1.00655	1	0.963176	1.00002	0.667771	0.00876441	0.648671	0.544144	0.870616	1	1	0.492859	1.00655	0.863801	1.00002	1.00655	1.00002	1	1	0.613037	1.00655	1	0.394552	1.00655	1.00655	1.00655	0.0794701	0.896278	0.837634	0.470771
Cluster_ManualM-G1genes	1	1.00153	0.856264	1	1	1	1	1	1	1	1	1	1	0.227878	1	1	1	1	1.00153	1.00153	1	0.614758	1	1	1	0.262121	1	0.802846	1	1	1	1.00153	1	1	1.00153	1	1	1	0.984752	1.00153	0.00225001	1	1.00153	1.00153	1.00153	1	0.754663	1	1
Cluster_ManualYap1Targets	1	1.01164	0.97358	1	1	0.919637	0.0479955	0.285131	1	1	0.576049	0.206327	1	0.85767	0.613595	1	0.158985	1	1.01164	1.01164	1	0.544887	1.00006	0.569259	0.789678	0.799906	0.394444	0.415533	1	1	0.729508	1.01164	0.101118	1.00006	1.01164	1.00006	1	1	0.775221	1.01164	0.930789	0.215447	1.01164	1.01164	1.01164	0.817593	0.857818	0.597695	0.301311
Cluster_ManualZAP1targets	0.090368	1.00771	0.0209437	1	1	0.665081	0.238003	1	1	1	0.364679	1	1	1	0.888219	1	1	1	1.00771	1.00771	1	0.811519	1.00003	0.358996	0.266832	0.383795	1	0.849742	1	1	0.453981	1.00771	0.765037	1.00003	1.00771	1.00003	0.248279	1	0.5947	1.00771	0.515221	0.44605	1.00771	1.00771	1.00771	0.551657	0.601564	0.882346	0.527193
Cluster_ManualZAP1targets-2	0.107605	1.01842	0.143315	1	1	0.594327	0.064786	1	1	1	0.580733	1	1	0.804148	0.963177	0.666533	1	1	1.01842	1.01842	1	0.963836	1.00016	0.572264	0.424898	0.524671	1	0.839017	1	1	0.630499	1.01842	0.820967	1.00016	1.01842	1.00016	0.490432	1	0.105052	1.01842	0.774549	0.75228	1.01842	1.01842	1.01842	0.814441	0.159774	0.715231	0.829611
Cluster_MATa1	1	1.00461	0.647304	1	1	0.505589	0.436291	1	1	1	1	1	1	0.540246	1	1	1	1	1.00461	1.00461	1	0.850042	1.00001	0.540246	1	0.84277	1	0.992407	1	1	0.872086	1.00461	0.698675	1.00001	1.00461	1.00001	1	1	0.78383	1.00461	0.65506	1	1.00461	1.00461	1.00461	0.521781	0.957034	1	1
Cluster_Mating	0.516072	1.00499	0.93895	1	1	0.812133	0.46265	1	1	1	1	1	1	1	0.395435	0.260481	1	1	1.00499	1.00499	1	0.20513	1.00001	1	1	0.668841	1	0.448356	1	1	0.105294	1.00499	0.741312	1.00001	1.00499	1.00001	1	1	0.868131	1.00499	0.684411	0.318473	1.00499	1.00499	1.00499	0.862381	0.399935	0.384264	1
Cluster_MBP1	0.634311	1.00694	0.610412	1	1	0.180817	0.577192	1	1	0.22644	0.317277	1	1	0.312066	1	1	1	1	1.00694	1.00694	1	0.659721	1.00002	0.688695	0.60673	0.961228	1	0.391714	1	1	0.344208	1.00694	0.88472	1.00002	1.00694	1.00002	1	1	0.542758	1.00694	4.73235e-06	0.412222	1.00694	1.00694	1.00694	0.242448	0.970335	0.556736	0.490282
Cluster_MCM1	1	1.0023	0.716347	1	0.00685451	0.772095	1	1	1	1	1	1	1	1	1	1	1	1	1.0023	1.0023	1	0.997907	1	1	0.266812	0.16966	1	1	1	1	0.197768	1.0023	0.321937	1	1.0023	1	1	1	0.880899	1.0023	1	1	1.0023	1.0023	1.0023	0.599095	0.655477	0.472807	1
Cluster_MET31	0.458771	1.00422	0.400761	1	1	1	1	0.115403	0.122897	1	0.028228	0.0809558	1	0.00344698	0.6997	1	1	1	1.00422	1.00422	1	0.877651	1.00001	1	0.0152973	0.545983	0.398132	0.52799	1	1	0.837061	1.00422	1	1.00001	1.00422	1.00001	0.145033	1	0.420364	1.00422	1	1	1.00422	1.00422	1.00422	0.00187701	0.831336	0.307367	1
Cluster_MET4	0.488217	1.00461	0.647304	1	1	0.948259	1	0.125232	0.133314	1	0.173653	1	1	0.540246	1	1	0.0666908	1	1.00461	1.00461	1	0.992385	1.00001	1	0.0196568	0.84277	1	0.946533	1	1	1	1.00461	0.698675	1.00001	1.00461	1.00001	1	1	0.0410171	1.00461	0.65506	1	1.00461	1.00461	1.00461	0.0764248	0.429218	0.346185	1
Cluster_MIG1	0.567345	1.00577	0.4963	1	1	0.0869731	0.511757	1	1	1	1	1	1	1	0.806359	1	1	1	1.00577	1.00577	1	0.758153	1.00002	1	1	0.540091	0.499869	0.596755	1	1	0.372121	1.00577	1	1.00002	1.00577	1.00002	1	1	0.168346	1.00577	0.735861	1	1.00577	1.00577	1.00577	0.0123499	0.728839	0.798785	1
Cluster_Mitochondria	0.47186	1.01124	0.094484	1	1	0.452567	0.750903	1	1	0.339354	0.277309	1	1	0.0314981	0.818225	0.490966	1	1	1.01124	1.01124	1	0.571641	1.00006	0.271164	0.778393	0.00546042	0.739009	0.671851	1	0.105467	0.693158	1.01124	0.832554	1.00006	1.01124	1.00006	0.339354	1	0.25678	1.01124	0.924306	1	1.01124	1.01124	1.01124	0.798796	0.403532	0.162642	0.663132
Cluster_MitochondrialRPs	0.279	1.01322	0.263988	1	1	0.471224	0.0189292	1	1	0.385214	0.893456	0.230564	1	0.638429	0.473334	1	1	1	1.01322	1.01322	1	0.234943	1.00008	0.358925	0.517635	0.645611	0.195204	0.124463	1	1	0.284856	1.01322	0.185166	1.00008	1.01322	1.00008	0.385214	1	0.583771	1.01322	0.951642	1	1.01322	1.01322	1.01322	0.72819	0.316331	0.121871	0.721103
Cluster_MOT3	0.394738	1.00345	0.514385	1	1	0.310817	0.349269	1	1	1	1	1	1	1	0.0573085	0.188398	1	1	1.00345	1.00345	1	0.334272	1.00001	0.0152691	0.37237	0.165904	0.058813	0.14465	1	1	0.199479	1.00345	0.851662	1.00001	1.00345	1.00001	1	1	0.332796	1.00345	1	1	1.00345	1.00345	1.00345	0.122167	0.530484	0.617438	1
Cluster_mRNAprocessing	0.555076	1.02084	0.933163	1	1	0.62959	0.451693	1	0.128728	0.171086	0.969917	1	1	0.426066	0.814125	0.710577	1	1	1.02084	1.02084	1	0.423063	1.00021	0.855004	1	0.338426	0.698571	0.735555	1	1	0.450275	1.02084	0.956044	1.00021	1.02084	1.00021	0.532871	1	0.86819	1.02084	0.840253	0.458772	1.02084	1.02084	1.02084	0.478569	0.853206	0.916299	0.306814
Cluster_MSS11	1	1.00384	0.919142	1	1	0.915148	1	1	0.112358	1	1	1	1	0.476541	1	1	1	1	1.00384	1.00384	1	0.903141	1.00001	0.476541	0.404088	0.757157	1	0.896546	1	1	0.793574	1.00384	0.880057	1.00001	1.00384	1.00001	1	1	0.508925	1.00384	1	1	1.00384	1.00384	1.00384	0.42303	0.855842	0.656251	0.311888
Cluster_MTH1	1	1.0023	0.92949	1	1	0.772095	0.248941	1	1	1	1	1	1	1	1	1	0.0338824	1	1.0023	1.0023	1	0.856375	1	1	0.266812	0.822768	1	0.649337	1	1	1	1.0023	0.321937	1	1.0023	1	1	1	0.643594	1.0023	1	1	1.0023	1.0023	1.0023	0.599095	0.655477	0.472807	1
Cluster_NDD1	1	1.00577	0.0552231	1	0.0170774	0.213801	1	1	1	1	0.244989	1	1	1	1	1	1	0.0773938	1.00577	1.00577	1	0.917072	1.00002	1	0.540334	0.314145	1	0.791802	1	1	0.372121	1.00577	0.317206	1.00002	1.00577	1.00002	1	1	0.168346	1.00577	0.127948	0.357623	1.00577	1.00577	1.00577	0.357089	0.347196	0.0569404	0.429506
Cluster_NRG1	1	1.00306	0.213856	1	1	0.244305	1	1	1	1	0.0867661	1	1	1	0.196897	0.169324	1	1	1.00306	1.00306	1	0.377628	1	1	0.338977	0.113881	1	0.0195443	1	1	0.675259	1.00306	0.81656	1	1.00306	1	1	1	0.702811	1.00306	0.507875	0.21	1.00306	1.00306	1.00306	0.0905912	0.569263	0.190027	1
Cluster_NuclearProteinTargetting	1	1.00967	0.548401	1	1	0.473181	0.325789	1	1	1	0.476718	0.0149422	1	1	0.486413	0.441026	1	1	1.00967	1.00967	1	0.201218	1.00004	0.203054	1	0.149165	0.685597	0.889429	1	1	0.839669	1.00967	0.0865485	1.00004	1.00967	1.00004	0.300285	1	0.16752	1.00967	0.891744	0.522443	1.00967	1.00967	1.00967	0.887386	0.485315	0.736056	1
Cluster_PDR1	1	1.00191	0.787394	1	1	0.708317	1	1	1	1	1	1	1	0.276264	1	1	1	1	1.00191	1.00191	1	0.544285	1	1	1	0.76345	1	1	1	1	0.789348	1.00191	0.653281	1	1.00191	1	1	1	0.762246	1.00191	1	1	1.00191	1.00191	1.00191	1	0.959983	0.413383	1
Cluster_PentosePhosphate	1	1.00153	0.856264	1	1	1	1	1	0.0465036	0.0553135	1	0.0301922	1	0.227878	1	1	1	1	1.00153	1.00153	1	0.614758	1	1	0.0141273	1	1	1	1	0.0151829	0.291426	1.00153	0.166664	1	1.00153	1	1	1	0.176346	1.00153	1	0.111099	1.00153	1.00153	1.00153	0.456161	0.754663	0.347289	1
Cluster_Peroxisome	1	1.00499	0.595482	1	1	0.310124	1	1	0.143612	1	0.573694	1	1	1	0.0376536	1	1	1	1.00499	1.00499	1	0.551604	1.00001	0.193448	0.490006	0.416709	0.0182745	0.0343785	1	1	0.71824	1.00499	0.936628	1.00001	1.00499	1.00001	1	1	0.273202	1.00499	0.684411	0.318473	1.00499	1.00499	1.00499	0.274524	0.399935	0.750685	1
Cluster_PHD1	1	1.00577	0.4963	1	1	0.213801	0.152206	1	1	0.192519	1	1	1	0.621639	0.196878	0.0446961	1	1	1.00577	1.00577	1	0.473993	1.00002	1	1	0.0564089	1	0.596755	1	1	0.600448	1.00577	0.81124	1.00002	1.00577	1.00002	0.192519	1	0.168346	1.00577	0.367064	1	1.00577	1.00577	1.00577	0.647256	0.347196	1	0.429506
Cluster_PHO4	1	1.0023	0.92949	1	1	1	0.248941	1	0.0689636	1	1	1	1	1	0.0172466	1	1	1	1.0023	1.0023	1	0.481867	1	1	1	1	0.0267673	0.100011	1	1	0.50711	1.0023	1	1	1.0023	1	1	1	0.880899	1.0023	1	1	1.0023	1.0023	1.0023	1	0.942618	0.116262	1
Cluster_Phospholipid	0.59092	1.00616	0.696969	1	1	0.474696	1	1	1	1	0.650054	1	1	1	0.826495	0.310375	1	1	1.00616	1.00616	1	0.971408	1.00002	1	1	0.804437	1	0.835113	1	1	0.433189	1.00616	0.966544	1.00002	1.00616	1.00002	1	1	0.83753	1.00616	1	1	1.00616	1.00616	1.00616	0.913053	0.702918	0.0174395	1
Cluster_Polyamine	1	1.00115	0.994658	1	1	1	1	1	1	1	1	1	1	0.176277	1	1	1	1	1.00115	1.00115	1	0.963785	1	1	1	1	1	0.259344	1	1	1	1.00115	0.47021	1	1.00115	1	1	1	0.956562	1.00115	0.233268	1	1.00115	1.00115	1.00115	0.36665	0.986853	1	1
Cluster_primig-EarlySpo	1	1.00655	0.995371	1	1	0.305958	1	1	1	1	0.672353	1	1	0.288314	0.253849	0.326259	1	1	1.00655	1.00655	1	0.879202	1.00002	0.667771	1	0.950665	0.0381247	0.171413	1	1	0.706459	1.00655	0.412337	1.00002	1.00655	1.00002	1	1	0.613037	1.00655	0.428883	0.394552	1.00655	1.00655	1.00655	0.715462	0.677136	1	1
Cluster_primig-LateSpo	0.598105	1.03029	0.413813	1	1	0.715942	1	0.0498787	1	1	0.533102	1	1	0.099109	0.535408	1	0.357623	0.0602878	1.03029	1.03029	1.00001	0.630506	1.00043	0.993159	0.0850837	0.992021	0.674613	0.82834	1	1	0.578726	1.03029	0.0116947	0.0294278	1.03029	1.00043	1	1	0.918688	1.03029	0.467455	1	1.03029	1.03029	1.03029	0.861886	0.859657	0.95798	0.532835
Cluster_primig-MidSpo	0.254659	1.00694	0.365515	1	1	0.354089	1	0.182028	1	1	1	1	1	1	0.283171	1	1	1	1.00694	1.00694	1	0.372124	1.00002	0.688695	0.60673	0.0566592	0.564801	0.107048	1	1	0.550032	1.00694	0.978157	1.00002	1.00694	1.00002	1	1	0.0753542	1.00694	0.7978	0.412222	1.00694	1.00694	1.00694	0.745212	0.280776	0.0289279	2.68542e-05
Cluster_Proline	1	1.00076	0.969387	1	1	0.388912	1	1	1	1	1	1	1	1	1	1	1	1	1.00076	1.00076	1	0.784142	1	1	1	0.438001	1	0.111111	1	1	1	1.00076	0.345201	1	1.00076	1	1	1	0.42011	1.00076	1	1	1.00076	1.00076	1.00076	0.262453	0.868762	1	1
Cluster_Proteasome	0.254659	1.00694	1	1	1	0.00761083	1	1	1	1	0.69324	1	1	0.098294	0.569515	1	1	1	1.00694	1.00694	1	0.659721	1.00002	1	0.60673	0.696102	0.564801	0.391714	1	1	0.181533	1.00694	0.45901	1.00002	1.00694	1.00002	1	1	0.723475	1.00694	0.7978	1	1.00694	1.00694	1.00694	0.745212	0.280776	0.854158	1
Cluster_Purine	1	1.00577	0.73953	1	1	0.420749	1	0.15409	1	1	0.244989	1	1	0.621639	0.196878	1	1	1	1.00577	1.00577	1	0.758153	1.00002	0.621639	0.172602	0.920769	0.144211	0.921386	1	1	0.808602	1.00577	0.140651	1.00002	1.00577	1.00002	0.192519	1	0.558532	1.00577	1	0.0682869	1.00577	1.00577	1.00577	0.0488475	0.347196	0.457271	1
Cluster_PUT3	0.567345	1.00577	0.89422	0.0338824	1	0.667826	0.511757	1	1	0.192519	1	0.108819	1	1	0.806359	1	1	1	1.00577	1.00577	1	0.473993	1.00002	0.621639	0.540334	0.76546	1	0.596755	1	1	0.808602	1.00577	1	1.00002	1.00577	1.00002	1	1	0.558532	1.00577	0.127948	0.357623	1.00577	1.00577	1.00577	0.647256	0.347196	0.798785	1
Cluster_Pyrimidine	1	1.00384	0.751517	1	1	0.154747	0.379663	1	1	1	0.480794	1	1	0.125858	0.277027	0.207042	1	1	1.00384	1.00384	1	0.679806	1.00001	1	1	0.757157	1	0.701604	1	1	0.793574	1.00384	0.880057	1.00001	1.00384	1.00001	1	1	0.257312	1.00384	0.587959	1	1.00384	1.00384	1.00384	0.42303	0.494333	1	0.0493327
Cluster_RAP1	0.116365	1.00422	0.699636	1	1	0.72926	1	1	1	0.145033	1	1	1	0.50942	1	1	1	1	1.00422	1.00422	1	0.261883	1.00001	1	1	0.545983	1	0.766709	0.0208247	1	0.967653	1.00422	0.903026	1.00001	1.00422	1.00001	1	1	0.663907	1.00422	0.0594477	0.0385287	1.00422	1.00422	1.00422	0.473804	0.831336	0.307367	1
Cluster_RCS1	1	1.00306	0.578256	1	1	0.244305	1	1	1	1	1	1	1	0.404071	0.582871	1	1	1	1.00306	1.00306	1	0.377628	1	1	1	0.63399	0.308597	0.258649	1	1	0.00602604	1.00306	0.81656	1	1.00306	1	1	1	0.702811	1.00306	1	1	1.00306	1.00306	1.00306	1	0.902034	1	1
Cluster_REB1	1	1.00538	0.26744	1	1	0.844421	1	1	1	0.180894	0.600829	1	1	0.596239	0.433057	0.277494	1	1	1.00538	1.00538	1	0.789937	1.00001	0.216929	1	0.720386	1	0.525114	1	0.0522365	0.766971	1.00538	0.778683	1.00001	1.00538	1.00001	1	1	0.215733	1.00538	1	1	1.00538	1.00538	1.00538	0.881905	0.754785	1	0.407695
Cluster_RFX1	1	1.00345	0.514385	1	1	0.310817	0.349269	1	1	1	1	1	1	1	1	1	1	1	1.00345	1.00345	1	0.724473	1.00001	1	1	0.165904	1	0.857558	1	1	0.93956	1.00345	0.851662	1.00001	1.00345	1.00001	1	0.0238174	0.825659	1.00345	0.173388	1	1.00345	1.00345	1.00345	0.122167	0.530484	0.617438	1
Cluster_RGM1	1	1.0023	0.716347	1	1	0.389428	1	1	1	1	1	1	1	1	1	1	1	1	1.0023	1.0023	1	0.856375	1	1	1	0.466857	1	1	0.0114024	1	0.50711	1.0023	1	1	1.0023	1	1	1	0.315494	1.0023	1	1	1.0023	1.0023	1.0023	0.202831	0.655477	0.116262	1
Cluster_RGT1	1	1.00694	0.610412	1	1	0.575909	0.577192	1	0.193351	1	0.69324	1	1	0.312066	0.569515	0.341783	1	1	1.00694	1.00694	1	0.659721	1.00002	1	1	0.866157	1	0.770141	1	1	0.550032	1.00694	0.88472	1.00002	1.00694	1.00002	1	1	0.858089	1.00694	0.7978	1	1.00694	1.00694	1.00694	0.477465	0.881466	0.854158	1
Cluster_RIM101	1	1.00616	0.696969	1	1	0.258907	1	1	1	1	0.269128	1	1	0.64545	0.504305	1	1	1	1.00616	1.00616	1	0.142151	1.00002	1	1	0.596563	0.522515	0.126031	1	1	0.433189	1.00616	0.839457	1.00002	1.00616	1.00002	1	1	0.28345	1.00616	0.398339	0.376357	1.00616	1.00616	1.00616	0.682854	0.323481	1	0.450521
Cluster_RLM1	1	1.00268	0.259406	1	0.00799387	1	0.283981	1	1	1	1	1	1	0.36418	0.534624	1	1	1	1.00268	1.00268	1	0.426586	1	1	1	0.556005	0.27591	0.737212	1	1	0.597772	1.00268	0.397811	1	1.00268	1	1	1	0.528163	1.00268	0.462201	1	1.00268	1.00268	1.00268	0.655819	0.610859	1	1
Cluster_RME1	1	1.0023	0.314632	1	1	0.122309	1	1	1	1	0.324946	1	1	1	1	1	1	1	1.0023	1.0023	1	0.481867	1	0.321636	1	1	1	0.319742	1	1	0.845796	1.0023	1	1	1.0023	1	1	1	0.315494	1.0023	0.412309	0.0115417	1.0023	1.0023	1.0023	0.202831	0.655477	0.0162114	1
Cluster_RNAPol	0.0549	1.01046	0.669301	1	1	0.954235	0.725704	1	1	1	0.242267	1	1	0.826851	0.539812	1	1	1	1.01046	1.01046	1	0.626013	1.00005	0.00100936	0.398004	0.358163	0.345073	0.035293	1	1	0.7692	1.01046	0.912557	1.00005	1.01046	1.00005	1	1	0.88675	1.01046	0.909471	0.183427	1.01046	1.01046	1.01046	0.756356	0.443096	0.774464	0.636737
Cluster_ROX1	1	1.00153	0.856264	1	1	1	1	1	1	1	1	1	1	1	0.353917	1	1	1	1.00153	1.00153	1	0.614758	1	1	0.186835	0.262121	0.168373	0.111054	1	1	0.712278	1.00153	1	1	1.00153	1	1	1	0.984752	1.00153	1	0.111099	1.00153	1.00153	1.00153	1	0.754663	1	1
Cluster_RPH1	1	1.00191	0.381585	1	1	1	0.212201	1	1	1	1	0.0376038	1	1	0.0862993	0.109418	1	1	1.00191	1.00191	1	0.896649	1	1	0.22785	0.76345	0.205871	0.539472	1	1	0.789348	1.00191	1	1	1.00191	1	1	1	0.762246	1.00191	1	1	1.00191	1.00191	1.00191	1	0.703334	1	1
Cluster_RPs	0.492631	1.03406	0.0976272	0.0143239	1	0.988104	1	1	0.266141	0.707242	0.975688	0.484078	1	0.910628	0.792469	0.586457	1	1	1.03406	1.03406	1.00001	0.832753	1.00054	0.790654	0.98851	0.203942	0.335806	0.389201	0.00975385	1	0.706581	1.03406	0.773469	1.00054	1.03406	1.00054	1	1	0.0414361	1.03406	0.0515548	0.450745	1.03406	1.03406	1.03406	0.0244971	0.3035	6.3284e-05	1
Cluster_rRNAprocessing	0.707851	1.0085	0.826351	1	1	0.542589	0.27319	1	1	1	0.764356	1	1	1	0.680687	0.400437	1	1	1.0085	1.0085	1	0.530702	1.00003	0.000253163	1	0.161392	1	0.904997	1	1	0.213047	1.0085	0.230325	1.00003	1.0085	1.00003	0.269518	1	0.981631	1.0085	1	1	1.0085	1.0085	1.0085	0.965354	0.553369	1	1
Cluster_RTG1	0.275224	1.00732	0.771293	1	1	0.622153	0.597009	1	1	1	0.341109	1	1	1	0.599721	0.356955	1	1	1.00732	1.00732	1	0.626796	1.00003	0.708308	1	0.536124	0.584529	0.279131	1	1	0.603886	1.00732	0.504345	1.00003	1.00732	1.00003	0.237435	1	0.810821	1.00732	0.815045	1	1.00732	1.00732	1.00732	0.772258	0.62638	1	0.50908
Cluster_RTG3	1	1.00268	0.892241	1	1	0.472985	1	1	1	1	1	1	1	1	1	1	1	1	1.00268	1.00268	1	0.963428	1	1	0.303822	0.867229	1	0.941785	1	1	0.887133	1.00268	0.132254	1	1.00268	1	1	1	0.797502	1.00268	0.462201	1	1.00268	1.00268	1.00268	0.655819	0.991206	1	1
Cluster_RTS2	1	1.00268	0.979155	1	1	0.472985	1	1	1	0.0948334	0.367798	1	1	0.36418	0.157995	0.14981	1	1	1.00268	1.00268	1	0.426586	1	0.0663742	1	0.867229	0.27591	0.429649	1	1	0.280456	1.00268	0.397811	1	1.00268	1	1	1	0.797502	1.00268	1	1	1.00268	1.00268	1.00268	0.655819	0.610859	1	1
Cluster_SFL1	1	1.00422	0.119766	1	1	1	1	1	1	1	0.150698	1	1	0.50942	0.6997	1	1	1	1.00422	1.00422	1	0.877651	1.00001	0.50942	1	0.804084	1	0.766709	1	1	0.837061	1.00422	0.65037	1.00001	1.00422	1.00001	0.145033	1	0.663907	1.00422	0.622993	1	1.00422	1.00422	1.00422	0.473804	0.460633	0.691139	1
Cluster_SFP1	0.427643	1.00384	0.751517	1	1	0.67723	1	1	0.112358	1	0.480794	1	1	0.476541	1	1	1	1	1.00384	1.00384	1	0.29588	1.00001	1	1	0.224459	1	0.0763024	1	1	0.793574	1.00384	0.880057	1.00001	1.00384	1.00001	1	1	0.903375	1.00384	0.205226	0.255295	1.00384	1.00384	1.00384	0.157061	0.494333	0.071745	1
Cluster_SIG1	1	1.00422	0.699636	1	1	1	1	1	1	1	1	1	1	1	1	1	1	1	1.00422	1.00422	1	0.971114	1.00001	0.50942	1	0.958236	1	0.52799	1	1	0.597882	1.00422	1	1.00001	1.00422	1.00001	1	1	0.663907	1.00422	0.237621	1	1.00422	1.00422	1.00422	0.473804	0.460633	1	1
Cluster_SIP4	1	1.00928	0.995354	1	1	0.979503	1	1	1	1	1	1	1	0.1867	0.726897	1	1	1	1.00928	1.00928	1	0.0533391	1.00004	0.448859	0.712294	0.579761	0.670631	0.253397	1	1	0.999451	1.00928	0.699415	1.00004	1.00928	1.00004	1	1	0.100171	1.00928	0.332363	1	1.00928	1.00928	1.00928	0.445615	0.507391	1	0.218711
Cluster_SKN7	0.567345	1.00577	0.966174	1	1	0.667826	0.152206	1	1	1	0.244989	1	1	0.0627754	0.469392	0.294123	1	1	1.00577	1.00577	1	0.758153	1.00002	1	0.172602	0.920769	1	0.20273	1	1	0.808602	1.00577	0.81124	1.00002	1.00577	1.00002	1	1	0.346047	1.00577	0.0324488	0.0682869	1.00577	1.00577	1.00577	0.150426	0.728839	0.457271	0.429506
Cluster_SKO1	0.394738	1.00345	0.801804	1	1	0.617325	0.0624359	1	0.101696	1	0.445558	1	1	0.441473	0.23678	1	1	1	1.00345	1.00345	1	0.724473	1.00001	0.441473	0.37237	0.925516	0.058813	0.349849	1	1	0.740127	1.00345	0.0735944	1.00001	1.00345	1.00001	1	1	0.604532	1.00345	0.549686	1	1.00345	1.00345	1.00345	1	0.879493	0.617438	0.285632
Cluster_SMP1	1	1.00191	0.381585	1	1	1	0.212201	1	1	1	1	1	1	0.276264	1	1	1	1	1.00191	1.00191	1	0.896649	1	1	1	1	1	1	1	1	1	1.00191	1	1	1.00191	1	1	1	0.424861	1.00191	0.357811	1	1.00191	1.00191	1.00191	1	0.703334	1	1
Cluster_SOK2	1	1.00268	0.259406	1	1	0.821946	0.283981	1	1	1	1	1	1	1	0.534624	0.14981	1	1	1.00268	1.00268	1	0.426586	1	1	0.303822	0.556005	1	0.429649	1	1	0.280456	1.00268	0.773174	1	1.00268	1	1	1	0.797502	1.00268	1	0.186343	1.00268	1.00268	1.00268	0.258747	0.610859	1	1
Cluster_sphingolipids	0.24325	1.00191	0.381585	1	1	0.300388	1	1	1	1	1	1	1	1	1	1	0.0283107	1	1.00191	1.00191	1	0.544285	1	1	1	0.367792	1	0.539472	1	1	1	1.00191	1	1	1.00191	1	1	1	0.424861	1.00191	0.00527359	1	1.00191	1.00191	1.00191	0.533051	0.703334	0.413383	1
Cluster_SRD1	1	1.00538	0.544946	1	1	0.968463	0.487787	1	1	0.180894	0.220946	1	1	0.596239	0.783894	0.277494	1	1	1.00538	1.00538	1	0.789937	1.00001	0.596239	0.515819	0.258886	1	0.73979	1	1	0.144306	1.00538	0.517089	1.00001	1.00538	1.00001	1	1	0.635395	1.00538	0.711275	1	1.00538	1.00538	1.00538	0.881905	0.372638	1	1
Cluster_STB1	1	1.0023	0.716347	1	1	1	1	1	1	1	1	1	1	1	1	1	1	1	1.0023	1.0023	1	0.856375	1	1	1	1	1	0.91256	1	1	1	1.0023	0.71955	1	1.0023	1	1	1	0.315494	1.0023	0.0853231	1	1.0023	1.0023	1.0023	0.599095	0.655477	0.472807	1
Cluster_STE12	1	1.00345	0.801804	1	1	0.891356	0.349269	1	1	0.120281	0.445558	1	1	1	0.626132	1	1	1	1.00345	1.00345	1	0.334272	1.00001	1	1	0.400126	0.33982	0.974211	1	1	0.448223	1.00345	0.53575	1.00001	1.00345	1.00001	0.120281	1	0.604532	1.00345	0.549686	1	1.00345	1.00345	1.00345	0.746374	0.530484	0.617438	1
Cluster_Sterols	1	1.00655	0.653736	1	1	1	1	0.172815	1	1	0.672353	1	1	0.667771	0.537699	1	0.0932337	1	1.00655	1.00655	1	0.12578	1.00002	0.288314	0.58573	0.837815	0.544144	0.956441	1	1	0.964126	1.00655	0.656876	1.00002	1.00655	1.00002	1	1	0.031271	1.00655	0.428883	1	1.00655	1.00655	1.00655	0.715462	0.301377	0.243034	0.470771
Cluster_STP1	1	1.00538	0.544946	1	1	0.61841	0.135872	1	1	1	1	1	1	1	0.0485555	0.0393055	1	1	1.00538	1.00538	1	0.511881	1.00001	1	1	0.258886	1	0.149093	1	1	0.311019	1.00538	0.778683	1.00001	1.00538	1.00001	0.180894	1	0.923118	1.00538	1	1	1.00538	1.00538	1.00538	0.0366816	0.372638	1	1
Cluster_STP2	1	1.00461	0.856631	0.0271836	1	0.948259	1	1	1	1	1	1	1	1	0.356714	1	1	1	1.00461	1.00461	1	0.231782	1.00001	0.540246	0.462829	0.84277	0.425343	0.177467	1	1	0.195254	1.00461	0.181045	1.00001	1.00461	1.00001	1	1	0.78383	1.00461	1	0.298025	1.00461	1.00461	1.00461	0.233921	0.429218	0.346185	1
Cluster_SUM1	1	1.00422	0.699636	1	1	1	1	1	0.122897	1	1	0.0809558	1	0.147751	0.6997	1	1	1	1.00422	1.00422	1	0.877651	1.00001	0.50942	1	0.545983	1	0.52799	1	1	0.597882	1.00422	0.65037	1.00001	1.00422	1.00001	0.145033	1	0.948866	1.00422	1	0.276971	1.00422	1.00422	1.00422	0.194547	0.831336	1	0.337188
Cluster_SWI4	1	1.00967	0.338753	1	1	0.828509	0.697978	1	1	0.300285	0.476718	1	1	0.203054	0.935546	1	1	1	1.00967	1.00967	1	0.942209	1.00004	1	0.726918	0.623822	0.685597	0.780056	1	1	0.519599	1.00967	0.730985	1.00004	1.00967	1.00004	0.300285	1	0.16752	1.00967	1.63363e-05	1	1.00967	1.00967	1.00967	0.272016	0.485315	0.736056	0.608297
Cluster_SWI5	0.634311	1.00694	0.805371	1	1	0.575909	1	1	1	1	0.69324	1	1	0.098294	0.860724	1	1	1	1.00694	1.00694	1	0.95363	1.00002	0.688695	1	0.866157	1	0.770141	1	1	0.751153	1.00694	0.978157	1.00002	1.00694	1.00002	1	1	0.0753542	1.00694	0.0595954	0.412222	1.00694	1.00694	1.00694	0.745212	0.881466	0.0289279	1
Cluster_SWI6	1	1.00616	0.696969	1	1	0.712394	1	1	1	1	0.650054	1	1	0.264476	0.826495	1	1	0.0823502	1.00616	1.00616	1	0.438041	1.00002	1	0.563618	0.937388	0.522515	0.262385	1	1	0.6562	1.00616	0.613722	1.00002	1.00616	1.00002	0.203984	1	0.483763	1.00616	0.0404743	1	1.00616	1.00616	1.00616	0.398064	0.996777	1	1
Cluster_TFs	1	1.00191	0.959568	1	1	0.708317	1	1	1	1	1	1	1	0.276264	1	1	1	1	1.00191	1.00191	1	0.896649	1	1	1	1	1	0.539472	1	1	1	1.00191	1	1	1.00191	1	1	1	0.945154	1.00191	1	1	1.00191	1.00191	1.00191	1	0.703334	1	1
Cluster_THI2	1	1.00306	0.578256	1	1	0.860908	1	1	1	1	1	1	1	1	0.582871	1	1	1	1.00306	1.00306	1	0.377628	1	0.404071	0.338977	0.322052	0.308597	0.532248	1	1	0.675259	1.00306	0.469466	1	1.00306	1	0.107646	1	0.423374	1.00306	0.142484	1	1.00306	1.00306	1.00306	0.314799	0.569263	1	0.0321903
Cluster_Thiamine	0.153942	1.00115	0.918844	1	1	0.522376	1	1	1	1	0.178288	1	1	1	1	1	1	1	1.00115	1.00115	1	0.963785	1	1	1	1	1	0.704043	1	1	1	1.00115	1	1	1.00115	1	1	1	0.715903	1.00115	1	1	1.00115	1.00115	1.00115	1	0.986853	1	1
Cluster_tRNAprocessing	0.65426	1.00732	0.56751	1	1	0.622153	1	1	1	1	1	1	0.028699	1	1	1	1	1	1.00732	1.00732	1	0.626796	1.00003	0.111598	0.247755	0.738763	1	0.922258	1	1	0.790424	1.00732	0.902632	1.00003	1.00732	1.00003	1	0.0497094	0.910609	1.00732	0.487392	0.429383	1.00732	1.00732	1.00732	0.275584	0.261576	1	1
Cluster_tRNAsynth	0.06059	1.00655	0.981254	1	1	0.526616	0.55641	0.0145073	1	1	0.293256	1	1	0.667771	0.844545	1	1	1	1.00655	1.00655	1	0.692757	1.00002	0.667771	0.0505842	0.950665	0.544144	0.523011	1	1	0.706459	1.00655	0.656876	1.00002	1.00655	1.00002	1	1	0.898535	1.00655	0.778955	0.0118901	1.00655	1.00655	1.00655	0.715462	0.677136	0.837634	0.126529
Cluster_Tryptophan	1	1.00268	0.645989	1	1	0.821946	0.283981	1	1	1	1	0.0522659	1	1	0.534624	0.14981	1	1	1.00268	1.00268	1	0.963428	1	1	1	1	1	0.941785	1	1	0.597772	1.00268	0.773174	1	1.00268	1	1	1	0.797502	1.00268	0.462201	1	1.00268	1.00268	1.00268	1	0.991206	1	1
Cluster_UGA3	0.0438545	1.00577	0.966174	1	1	0.213801	0.511757	1	1	1	0.626246	1	1	1	0.806359	1	1	1	1.00577	1.00577	1	0.473993	1.00002	0.621639	0.0364104	0.540091	1	0.596755	1	1	0.939721	1.00577	0.958601	1.00002	1.00577	1.00002	0.192519	1	0.750689	1.00577	1	1	1.00577	1.00577	1.00577	0.357089	0.347196	0.457271	0.429506
Cluster_USV1	0.458771	1.00422	0.699636	1	1	0.933737	1	1	1	1	0.513804	1	1	0.50942	0.6997	0.225263	1	0.0573184	1.00422	1.00422	1	0.971114	1.00001	0.50942	1	0.804084	1	0.52799	1	1	0.967653	1.00422	0.903026	1.00001	1.00422	1.00001	0.145033	1	0.663907	1.00422	0.622993	1	1.00422	1.00422	1.00422	0.813151	0.460633	1	1
Cluster_Vacuole	0.369896	1.01561	0.273455	1	1	0.521047	0.563127	1	0.38092	1	0.731844	1	1	0.238508	0.112103	0.606773	1	1	1.01561	1.01561	1	0.509984	1.00012	1	0.875437	0.562957	0.267788	0.470967	1	1	0.377116	1.01561	0.124248	1.00012	1.01561	1.00012	1	1	0.928335	1.01561	0.247291	1	1.01561	1.01561	1.01561	0.837312	0.71341	0.380006	0.0564319
Node 1	1	1.00153	0.462747	1	1	0.209312	0.17368	0.0435533	1	1	1	1	1	1	0.353917	1	1	1	1.00153	1.00153	1	0.93301	1	1	0.186835	0.684318	1	0.802846	1	1	0.291426	1.00153	0.571392	1	1.00153	1	1	1	0.559815	1.00153	1	0.111099	1.00153	1.00153	1.00153	0.456161	0.754663	0.347289	1
Node 10	1	1.00268	0.259406	1	1	0.472985	1	1	0.0800007	1	1	1	1	1	0.157995	1	1	1	1.00268	1.00268	1	0.426586	1	1	1	0.243988	0.0363834	0.0451207	1	1	1	1.00268	0.773174	1	1.00268	1	1	1	0.943446	1.00268	1	1	1.00268	1.00268	1.00268	0.655819	0.610859	0.526232	1
Node 11	0.016272	1.00153	0.462747	1	1	0.626731	1	1	1	1	0.23039	1	1	0.227878	1	1	1	1	1.00153	1.00153	1	0.614758	1	1	1	0.262121	1	0.111054	1	1	0.712278	1.00153	0.0237002	1	1.00153	1	1	1	0.559815	1.00153	1	0.111099	1.00153	1.00153	1.00153	1	0.754663	0.347289	1
Node 12	1	1.00191	0.381585	1	1	0.708317	1	1	1	1	0.00227017	1	1	1	0.0862993	0.109418	1	1	1.00191	1.00191	1	0.544285	1	1	1	0.76345	1	0.209876	1	1	0.403996	1.00191	0.000248577	1	1.00191	1	1	1	0.424861	1.00191	1	1	1.00191	1.00191	1.00191	0.533051	0.703334	0.413383	1
Node 13	1	1.00191	0.381585	1	1	1	1	1	1	1	1	1	1	0.276264	1	1	1	1	1.00191	1.00191	1	0.544285	1	1	1	0.76345	1	0.86869	1	1	0.403996	1.00191	0.243836	1	1.00191	1	1	1	0.762246	1.00191	1	1	1.00191	1.00191	1.00191	0.533051	0.703334	1	0.0123527
Node 14	0.213716	1.00616	0.201122	1	1	0.894331	0.534614	1	1	1	0.650054	0.115659	1	0.0738325	0.826495	1	0.0879821	1	1.00616	1.00616	1	0.438041	1.00002	1	1	0.0793455	0.522515	0.126031	1	1	0.10722	1.00616	0.364856	1.00002	1.00616	1.00002	1	1	0.28345	1.00616	1	1	1.00616	1.00616	1.00616	0.398064	0.323481	0.491868	0.00219229
Node 15	0.427643	1.00384	0.455102	1	1	1	1	1	1	1	1	0.0738617	1	0.476541	1	1	1	1	1.00384	1.00384	1	0.679806	1.00001	1	1	0.0196346	1	0.441084	1	1	0.0271918	1.00384	1	1.00001	1.00384	1.00001	1	1	0.508925	1.00384	1	1	1.00384	1.00384	1.00384	0.42303	0.494333	0.656251	0.0493327
Node 16	1	1.00115	0.918844	1	1	0.121984	1	1	1	1	1	1	1	0.176277	0.279316	1	1	1	1.00115	1.00115	1	0.694321	1	1	0.143658	0.578769	1	0.0369946	1	1	0.607065	1.00115	1	1	1.00115	1	1	1	0.956562	1.00115	1	1	1.00115	1.00115	1.00115	1	0.809717	0.273779	1
Node 17	1	1.00038	0.824876	1	1	1	1	1	1	1	1	1	1	1	1	1	1	1	1.00038	1.00038	1	0.88554	1	1	1	1	1	1	1	1	1	1.00038	1	1	1.00038	1	1	1	0.648226	1.00038	1	1	1.00038	1.00038	1.00038	1	0.932087	1	1
Node 18	1	1.00038	1	1	1	0.218237	1	1	1	1	1	1	1	1	1	1	1	1	1.00038	1.00038	1	0.88554	1	1	1	1	1	0.333461	1	1	1	1.00038	1	1	1.00038	1	1	1	0.648226	1.00038	1	1	1.00038	1.00038	1.00038	1	0.932087	1	1
Node 19	1	1.00038	0.824876	1	1	1	1	1	1	1	1	1	1	1	0.103396	0.022892	1	1	1.00038	1.00038	1	0.88554	1	1	1	0.250286	0.045021	0.333461	1	1	1	1.00038	1	1	1.00038	1	1	1	0.648226	1.00038	1	1	1.00038	1.00038	1.00038	1	0.932087	1	1
Node 2	0.673128	1.00771	0.953513	0.0449616	1	0.952736	0.238003	0.200156	1	1	0.0338459	1	1	0.726693	0.628309	1	1	1	1.00771	1.00771	1	0.811519	1.00003	0.726693	0.0158689	0.996929	0.603371	0.996789	1	1	0.271516	1.00771	0.985744	1.00003	1.00771	1.00003	1	1	0.757825	1.00771	0.830825	1	1.00771	1.00771	1.00771	0.551657	0.95774	0.615524	0.527193
Node 2_fuzzy0.06	0.234313	1.01203	0.922051	0.0689636	1	0.839352	0.172715	0.0450934	0.309942	1	0.0115219	1	1	0.587403	0.401147	0.514265	1	1	1.01203	1.01203	1	0.864744	1.00007	0.866679	0.00378219	0.91902	0.762235	0.86267	1	1	0.453757	1.01203	0.869999	1.00007	1.01203	1.00007	0.358084	1	0.837167	1.01203	0.936719	0.600493	1.01203	1.01203	1.01203	0.83488	0.945106	0.836886	0.687628
Node 20	1	1.00038	0.824876	1	1	1	1	1	1	1	1	1	1	1	0.103396	1	1	1	1.00038	1.00038	1	0.88554	1	1	1	0.250286	1	0.333461	1	1	1	1.00038	0.190767	1	1.00038	1	1	1	1	1.00038	1	1	1.00038	1.00038	1.00038	1	0.932087	1	1
Node 21	1	1.00076	0.680365	1	1	1	1	1	1	1	1	1	1	0.12125	1	1	1	1	1.00076	1.00076	1	0.784142	1	1	1	1	1	1	1	1	0.463453	1.00076	1	1	1.00076	1	1	1	0.876342	1.00076	1	1	1.00076	1.00076	1.00076	1	0.868762	1	1
Node 22	1	1.00038	0.824876	1	1	1	1	1	1	1	1	1	1	1	1	1	1	1	1.00038	1.00038	1	0.88554	1	1	1	0.250286	1	1	1	1	1	1.00038	1	1	1.00038	1	1	1	1	1.00038	1	1	1.00038	1.00038	1.00038	1	0.932087	1	1
Node 23
Node 24
Node 25	1	1.00038	0.824876	1	1	1	1	1	1	1	1	1	1	1	1	1	1	1	1.00038	1.00038	1	0.88554	1	1	1	0.250286	1	0.333461	1	1	1	1.00038	0.190767	1	1.00038	1	1	1	0.648226	1.00038	1	1	1.00038	1.00038	1.00038	0.141167	0.932087	1	1
Node 26	1	1.00038	0.824876	1	1	1	1	1	1	1	1	1	1	1	1	1	1	1	1.00038	1.00038	1	1	1	1	1	1	1	1	1	1	0.267455	1.00038	0.190767	1	1.00038	1	1	1	0.648226	1.00038	1	1	1.00038	1.00038	1.00038	1	0.932087	1	1
Node 27
Node 28	1	1.00076	0.969387	1	1	1	1	1	1	1	1	1	1	1	1	1	1	1	1.00076	1.00076	1	0.986938	1	1	1	1	1	1	1	1	1	1.00076	1	1	1.00076	1	1	1	0.876342	1.00076	1	1	1.00076	1.00076	1.00076	0.262453	0.868762	1	1
Node 29
Node 3	1	1.00076	0.680365	1	1	1	1	1	1	1	1	1	1	1	0.196136	1	1	0.0106564	1.00076	1.00076	1	0.784142	1	1	1	1	0.0880315	0.55581	1	1	0.463453	1.00076	1	1	1.00076	1	1	1	0.876342	1.00076	1	1	1.00076	1.00076	1.00076	1	0.868762	1	1
Node 30	1	1.00115	0.561126	1	1	0.522376	0.133291	1	1	1	1	1	1	1	1	1	1	1	1.00115	1.00115	1	0.694321	1	1	0.143658	0.578769	1	0.704043	1	1	0.607065	1.00115	0.0951819	1	1.00115	1	1	1	0.272213	1.00115	1	0.084523	1.00115	1.00115	1.00115	1	0.809717	1	1
Node 31	0.0438545	1.00577	0.4963	1	1	0.420749	0.511757	1	1	1	1	1	1	1	0.469392	1	1	1	1.00577	1.00577	1	0.917072	1.00002	1	0.172602	0.98689	1	0.381833	1	1	0.939721	1.00577	0.81124	1.00002	1.00577	1.00002	1	1	0.88452	1.00577	0.735861	0.357623	1.00577	1.00577	1.00577	0.647256	0.728839	0.457271	1
Node 32	0.542421	1.00538	0.780781	1	1	0.365563	1	1	1	1	1	1	1	0.596239	0.0485555	0.0393055	1	1	1.00538	1.00538	1	0.789937	1.00001	1	1	0.720386	1	0.310192	1	1	0.766971	1.00538	0.270124	1.00001	1.00538	1.00001	1	1	0.813144	1.00538	1	1	1.00538	1.00538	1.00538	0.608567	0.372638	0.421355	0.407695
Node 33	1	1.00038	1	1	1	0.218237	1	1	1	1	1	1	1	1	1	1	1	1	1.00038	1.00038	1	0.88554	1	1	0.0503625	1	1	0.333461	1	1	0.267455	1.00038	1	1	1.00038	1	1	1	0.648226	1.00038	1	1	1.00038	1.00038	1.00038	1	0.932087	1	1
Node 34	1	1.00115	0.918844	1	1	0.522376	0.133291	1	1	1	1	1	1	1	0.279316	1	1	1	1.00115	1.00115	1	0.694321	1	0.176277	1	1	1	0.259344	1	1	0.607065	1.00115	1	1	1.00115	1	1	1	0.715903	1.00115	1	1	1.00115	1.00115	1.00115	1	0.809717	1	1
Node 35	1	1.00038	0.824876	1	1	1	1	1	1	1	1	1	1	1	1	1	1	1	1.00038	1.00038	1	1	1	1	1	1	1	1	1	1	1	1.00038	1	1	1.00038	1	1	1	1	1.00038	1	1	1.00038	1.00038	1.00038	1	0.932087	1	1
Node 36	0.496453	1.02656	0.0368065	1	1	0.824462	0.0887722	1	0.554002	0.0669002	0.420571	1	1	0.613137	0.548796	1	1	1	1.02656	1.02656	1.00001	0.493074	1.00033	0.930368	0.860665	0.143668	0.356393	0.202354	1	0.228488	0.830114	1.02656	0.646823	1.00033	1.02656	1.00033	0.61896	1	0.145423	1.02656	0.683266	0.127464	1.02656	1.02656	1.02656	0.00402456	0.698382	0.00214391	1
Node 37	1	1.00115	0.918844	1	1	0.522376	1	1	1	1	1	1	1	1	0.279316	1	1	1	1.00115	1.00115	1	0.963785	1	1	1	1	0.129121	0.704043	1	1	0.607065	1.00115	0.47021	1	1.00115	1	1	1	0.715903	1.00115	1	1	1.00115	1.00115	1.00115	0.36665	0.809717	0.273779	1
Node 38	1	1.00076	0.969387	1	1	1	1	1	1	1	1	1	1	1	1	1	1	1	1.00076	1.00076	1	0.784142	1	1	1	1	1	1	1	1	0.0714575	1.00076	0.345201	1	1.00076	1	1	1	0.42011	1.00076	1	1	1.00076	1.00076	1.00076	0.262453	0.868762	1	1
Node 39	1	1.00616	0.953639	1	1	0.712394	0.534614	1	1	1	1	1	1	1	0.225008	0.310375	1	1	1.00616	1.00616	1	0.993687	1.00002	1	1	0.937388	1	0.661871	1	1	0.843772	1.00616	1	1.00002	1.00616	1.00002	1	1	0.483763	1.00616	0.398339	1	1.00616	1.00616	1.00616	0.682854	0.980379	0.215091	1
Node 4	1	1.0023	0.314632	1	1	0.389428	1	1	1	1	1	1	1	1	1	1	1	1	1.0023	1.0023	1	0.856375	1	0.321636	1	0.0375723	1	0.91256	1	1	1	1.0023	0.71955	1	1.0023	1	0.0818423	1	0.315494	1.0023	1	1	1.0023	1.0023	1.0023	0.599095	0.655477	0.116262	1
Node 40	1	1.00038	0.824876	1	1	1	1	1	1	1	1	1	1	1	1	1	1	1	1.00038	1.00038	1	0.88554	1	1	1	0.250286	1	0.333461	1	1	1	1.00038	1	1	1.00038	1	0.0141167	1	0.648226	1.00038	0.0847005	1	1.00038	1.00038	1.00038	1	0.932087	0.101106	1
Node 41
Node 42	1	1.00076	0.680365	1	1	1	1	1	1	1	1	1	1	1	1	1	1	1	1.00076	1.00076	1	0.784142	1	1	1	1	1	1	1	1	1	1.00076	0.345201	1	1.00076	1	1	1	0.42011	1.00076	1	1	1.00076	1.00076	1.00076	1	0.868762	0.192025	1
Node 43	1	1.00076	0.680365	1	1	0.388912	1	1	1	1	1	1	1	1	1	1	1	1	1.00076	1.00076	1	0.784142	1	1	1	1	1	1	1	1	0.463453	1.00076	0.345201	1	1.00076	1	1	1	0.876342	1.00076	1	1	1.00076	1.00076	1.00076	1	0.868762	1	1
Node 44	1	1.00038	0.824876	1	1	0.218237	1	1	1	1	0.0633346	1	1	1	1	1	1	1	1.00038	1.00038	1	0.88554	1	1	1	1	1	0.333461	1	1	1	1.00038	1	1	1.00038	1	1	1	0.648226	1.00038	0.0847005	1	1.00038	1.00038	1.00038	0.141167	0.932087	0.101106	1
Node 45	0.339609	1.01481	0.656266	1	1	0.979075	0.534975	1	1	0.0155589	0.00854137	1	1	0.698632	0.98468	1	1	1	1.01481	1.01481	1	0.99164	1.0001	1	0.299045	0.130931	0.828518	0.998887	1	0.00856137	0.586134	1.01481	0.949941	1.0001	1.01481	1.0001	0.419657	1	0.163368	1.01481	0.845625	0.302377	1.01481	1.01481	1.01481	0.0128802	0.959662	0.179687	0.408781
Node 46	1	1.00076	0.680365	1	1	0.388912	1	1	1	1	1	1	1	1	1	1	1	1	1.00076	1.00076	1	0.784142	1	1	1	1	1	1	1	1	1	1.00076	1	1	1.00076	1	1	1	0.42011	1.00076	1	1	1.00076	1.00076	1.00076	1	0.868762	1	1
Node 47	1	1.00038	1	1	1	1	1	1	1	1	1	1	1	1	1	1	1	1	1.00038	1.00038	1	0.88554	1	1	1	1	1	1	1	1	1	1.00038	1	1	1.00038	1	1	1	1	1.00038	1	1	1.00038	1.00038	1.00038	1	1	1	1
Node 48
Node 49	0.153942	1.00115	0.561126	1	1	0.121984	1	1	1	1	0.178288	1	1	1	1	1	1	1	1.00115	1.00115	1	0.694321	1	1	1	0.578769	1	0.0369946	1	1	0.607065	1.00115	0.47021	1	1.00115	1	1	1	0.956562	1.00115	1	1	1.00115	1.00115	1.00115	1	0.809717	1	1
Node 5	1	1.00191	0.787394	1	1	1	1	1	1	1	1	1	1	1	1	1	1	1	1.00191	1.00191	1	0.896649	1	0.276264	1	0.76345	1	0.539472	1	1	0.403996	1.00191	0.243836	1	1.00191	1	1	1	0.945154	1.00191	0.357811	0.136914	1.00191	1.00191	1.00191	1	0.703334	1	1
Node 50
Node 51	1	1.00038	1	1	1	1	1	1	1	1	1	1	1	1	1	1	1	1	1.00038	1.00038	1	1	1	1	1	1	1	1	1	1	1	1.00038	0.190767	1	1.00038	1	1	1	1	1.00038	1	1	1.00038	1.00038	1.00038	1	1	1	1
Node 52	0.153942	1.00115	0.561126	1	1	1	0.133291	1	1	0.0417709	1	1	1	1	1	1	1	1	1.00115	1.00115	1	0.694321	1	1	1	1	1	1	1	1	0.607065	1.00115	0.47021	1	1.00115	1	1	1	0.272213	1.00115	1	1	1.00115	1.00115	1.00115	1	0.809717	0.0285174	1
Node 53
Node 54	1	1.00038	0.824876	1	1	0.218237	1	1	1	1	1	1	1	1	1	1	1	1	1.00038	1.00038	1	0.88554	1	1	1	1	1	1	1	1	1	1.00038	0.190767	1	1.00038	1	1	1	0.648226	1.00038	1	1	1.00038	1.00038	1.00038	1	0.932087	1	1
Node 55	0.10544	1.00076	0.680365	1	1	1	1	1	1	1	1	1	1	1	1	1	1	1	1.00076	1.00076	1	0.986938	1	1	1	1	1	1	1	1	0.463453	1.00076	0.345201	1	1.00076	1	1	1	0.876342	1.00076	1	1	1.00076	1.00076	1.00076	1	0.995412	1	1
Node 56
Node 57
Node 58	1	1.00038	0.824876	1	1	0.218237	1	1	1	1	1	1	1	1	1	1	1	1	1.00038	1.00038	1	0.88554	1	1	1	1	1	1	1	1	1	1.00038	1	1	1.00038	1	1	1	0.648226	1.00038	1	1	1.00038	1.00038	1.00038	1	0.932087	1	1
Node 59	1	1.00038	0.824876	0.0022892	1	1	1	1	1	1	1	1	1	1	1	1	1	1	1.00038	1.00038	1	1	1	1	1	0.250286	1	1	1	1	1	1.00038	1	1	1.00038	1	1	1	0.648226	1.00038	0.0847005	1	1.00038	1.00038	1.00038	1	0.932087	1	1
Node 6	1	1.00191	0.959568	1	1	0.300388	1	1	1	1	0.279208	1	1	0.276264	0.420821	0.109418	1	1	1.00191	1.00191	1	0.544285	1	1	1	0.76345	1	0.209876	1	1	0.789348	1.00191	0.653281	1	1.00191	1	1	1	0.424861	1.00191	1	1	1.00191	1.00191	1.00191	1	0.703334	1	1
Node 60
Node 61	1	1.00038	0.824876	1	1	1	1	1	1	1	1	1	1	1	1	1	1	1	1.00038	1.00038	1	1	1	1	1	0.250286	1	1	1	1	1	1.00038	1	1	1.00038	1	1	1	0.648226	1.00038	1	1	1.00038	1.00038	1.00038	0.141167	0.932087	1	1
Node 62	1	1.00153	0.462747	1	1	0.626731	1	1	1	1	1	1	1	1	0.353917	1	1	1	1.00153	1.00153	1	0.614758	1	0.227878	1	0.684318	1	0.111054	1	1	0.712278	1.00153	0.571392	1	1.00153	1	1	1	0.984752	1.00153	0.298285	1	1.00153	1.00153	1.00153	1	0.754663	0.0532496	1
Node 63	1	1.00038	0.824876	1	1	1	1	1	1	1	1	1	1	1	0.103396	1	1	1	1.00038	1.00038	1	0.88554	1	1	1	1	0.045021	0.333461	1	1	1	1.00038	1	1	1.00038	1	1	1	1	1.00038	0.0847005	1	1.00038	1.00038	1.00038	1	1	0.101106	1
Node 64	1	1.00115	0.561126	1	1	1	1	1	1	1	1	1	1	1	1	1	1	1	1.00115	1.00115	1	0.963785	1	1	1	0.015625	1	0.704043	1	1	0.607065	1.00115	1	1	1.00115	1	1	1	0.272213	1.00115	1	1	1.00115	1.00115	1.00115	0.36665	0.809717	1	1
Node 65	1	1.00153	0.99907	1	1	1	1	1	1	1	0.23039	1	1	1	0.353917	1	1	1	1.00153	1.00153	1	0.93301	1	1	1	0.684318	0.168373	0.802846	1	1	0.291426	1.00153	0.571392	1	1.00153	1	1	1	0.871991	1.00153	1	1	1.00153	1.00153	1.00153	1	0.754663	1	1
Node 66	0.65426	1.00732	0.56751	1	1	0.818458	0.597009	1	0.00127773	1	0.0284418	1	1	0.335651	0.125351	0.356955	1	1	1.00732	1.00732	1	0.342162	1.00003	1	0.626673	0.890044	0.209686	0.279131	1	1	0.399242	1.00732	0.136924	1.00003	1.00732	1.00003	1	0.0497094	0.290386	1.00732	0.815045	1	1.00732	1.00732	1.00732	0.275584	0.261576	0.869005	1
Node 67
Node 68	0.213716	1.00616	0.997114	1	1	0.000502725	1	1	1	1	1	1	1	0.264476	0.504305	1	1	1	1.00616	1.00616	1	0.142151	1.00002	1	0.563618	0.596563	0.522515	0.453501	1	1	0.10722	1.00616	0.174254	1.00002	1.00616	1.00002	1	1	0.129978	1.00616	0.758363	1	1.00616	1.00616	1.00616	0.398064	0.323481	1	0.450521
Node 69	1	1.00038	1	1	1	1	1	1	1	1	1	1	1	1	1	1	1	1	1.00038	1.00038	1	1	1	1	1	1	1	1	1	1	1	1.00038	1	1	1.00038	1	1	1	1	1.00038	1	1	1.00038	1.00038	1.00038	1	1	1	1
Node 7	0.404898	1.04562	0.14712	0.230709	0.122841	0.170767	0.147136	0.720134	0.0408286	1	0.167964	0.58384	1	0.159061	0.73807	0.477148	0.132417	0.458254	1.04562	1.04562	1.00003	0.475671	1.00096	0.714135	0.929402	0.627857	0.889824	0.56488	1	1	0.699933	1.04562	0.575459	1.00096	1.04562	1.00096	1	1	0.0208807	1.04562	0.851401	0.409918	1.04562	1.04562	1.04562	0.0108763	0.65081	7.86646e-05	0.594683
Node 70	1	1.00038	0.824876	1	1	1	1	1	1	1	1	1	1	1	1	1	1	1	1.00038	1.00038	1	0.88554	1	1	1	0.250286	1	1	1	1	1	1.00038	1	1	1.00038	1	1	1	1	1.00038	1	1	1.00038	1.00038	1.00038	1	0.932087	1	1
Node 71	1	1.00076	0.680365	1	1	0.388912	1	1	1	1	1	1	1	1	0.196136	1	1	1	1.00076	1.00076	1	0.784142	1	1	1	0.438001	1	0.55581	1	1	0.463453	1.00076	1	1	1.00076	1	1	1	0.876342	1.00076	1	1	1.00076	1.00076	1.00076	0.262453	0.868762	1	1
Node 72	0.0436072	1.0531	0.966349	1	1	0.549458	0.562895	0.168638	0.792752	1	0.721641	0.636937	1	0.916899	0.96593	1	0.166427	1	1.0531	1.0531	1.00004	0.0612345	1.00129	0.565467	0.790126	0.715732	0.700767	0.805793	0.223182	1	0.494426	1.0531	0.325742	1.00129	1.0531	1.00129	1	1	0.587041	1.0531	0.198245	0.318375	1.0531	1.0531	1.0531	0.662922	0.213139	0.550484	0.333525
Node 73	0.06032	1.13239	0.421783	0.505528	1.00004	0.36578	0.485829	0.967285	0.683543	0.794288	0.838684	0.666798	1	0.452198	0.531125	0.119553	1	0.807172	1.13239	1.13239	1.00052	0.607857	0.117792	4.42416e-20	0.881942	0.905385	0.669506	0.753063	0.0973481	0.691097	0.556076	1.13239	0.421187	1.00715	1.13239	1.00715	0.987355	1	0.865524	1.13239	0.187734	0.46825	1.13239	1.13239	1.13239	0.876516	0.760741	0.251828	0.964072
Node 74	1	1.00153	0.462747	1	1	1	1	1	1	1	1	1	1	1	0.353917	1	1	1	1.00153	1.00153	1	0.614758	1	1	1	0.684318	1	0.012308	1	1	1	1.00153	1	1	1.00153	1	1	1	0.176346	1.00153	1	0.111099	1.00153	1.00153	1.00153	1	0.974877	1	1
Node 75	1	1.00115	0.561126	1	1	1	1	1	1	1	1	1	1	1	1	1	1	1	1.00115	1.00115	1	0.694321	1	1	1	1	1	0.259344	1	1	1	1.00115	1	1	1.00115	1	1	1	0.715903	1.00115	1	1	1.00115	1.00115	1.00115	0.36665	0.809717	1	1
Node 76	0.284327	1.0023	0.716347	1	1	0.122309	1	1	0.0689636	1	1	1	1	1	1	1	1	1	1.0023	1.0023	1	0.481867	1	1	1	0.16966	1	0.319742	1	1	0.50711	1.0023	0.321937	1	1.0023	1	1	1	0.880899	1.0023	1	0.161988	1.0023	1.0023	1.0023	0.599095	0.655477	1	1
Node 77	1	1.00038	0.824876	1	1	1	1	1	1	1	1	1	1	1	1	1	1	1	1.00038	1.00038	1	0.88554	1	1	1	0.250286	1	0.333461	1	1	1	1.00038	1	1	1.00038	1	1	1	0.648226	1.00038	1	1	1.00038	1.00038	1.00038	0.141167	0.932087	1	1
Node 78
Node 79	1	1.00038	0.824876	1	1	1	1	1	1	1	1	1	1	1	1	1	1	1	1.00038	1.00038	1	1	1	1	1	1	1	1	1	1	1	1.00038	1	1	1.00038	1	1	1	1	1.00038	1	1	1.00038	1.00038	1.00038	1	0.932087	1	1
Node 8	1	1.01801	0.832	1	1	0.291389	0.362568	0.403259	0.101659	1	0.332332	0.299128	1	0.324166	0.0956401	0.284044	0.233802	0.220039	1.01801	1.01801	1	0.380661	1.00015	0.950161	0.683341	0.242988	0.150205	0.028131	1	1	0.999502	1.01801	0.250026	1.00015	1.01801	1.00015	0.483003	1	0.203172	1.01801	0.912253	0.744746	1.01801	1.01801	1.01801	0.799068	0.618461	0.318821	0.236342
Node 80	1	1.00345	0.801804	1	1	0.891356	0.349269	0.0954243	0.101696	1	0.107047	0.0667156	1	0.441473	0.23678	0.188398	1	1	1.00345	1.00345	1	0.724473	1.00001	1	0.37237	0.925516	1	0.623448	1	1	0.199479	1.00345	0.53575	1.00001	1.00345	1.00001	0.120281	1	0.332796	1.00345	1	1	1.00345	1.00345	1.00345	0.369837	0.980929	1	1
Node 81	1	1.00268	0.645989	0.0159329	1	1	1	1	1	1	0.367798	0.0522659	1	1	1	1	1	1	1.00268	1.00268	1	0.813553	1	1	0.303822	0.0705563	1	0.941785	1	1	0.887133	1.00268	0.773174	1	1.00268	1	0.00389543	1	0.230427	1.00268	1	1	1.00268	1.00268	1.00268	0.655819	0.991206	1	1
Node 82	1	1.0023	0.314632	1	1	0.772095	1	1	1	1	0.324946	1	1	1	1	1	1	0.0316537	1.0023	1.0023	1	0.481867	1	1	1	0.466857	1	0.91256	1	1	0.197768	1.0023	0.321937	1	1.0023	1	1	1	0.880899	1.0023	0.412309	1	1.0023	1.0023	1.0023	1	0.655477	0.472807	1
Node 83	1	1.00191	0.787394	1	1	0.0726977	1	1	1	1	1	1	1	1	0.420821	1	1	1	1.00191	1.00191	1	0.896649	1	0.276264	0.22785	0.76345	0.205871	0.539472	1	1	1	1.00191	0.653281	1	1.00191	1	1	1	0.114217	1.00191	0.357811	1	1.00191	1.00191	1.00191	1	0.703334	1	1
Node 84	1	1.00153	0.981424	1	1	0.626731	1	1	1	1	1	1	1	0.227878	0.353917	1	1	0.0212074	1.00153	1.00153	1	0.614758	1	1	1	0.684318	0.168373	0.802846	1	1	0.712278	1.00153	0.571392	1	1.00153	1	1	1	0.559815	1.00153	0.298285	1	1.00153	1.00153	1.00153	1	0.754663	1	1
Node 85	1	1.00076	0.969387	1	1	0.0475624	1	1	1	1	1	1	1	1	0.196136	1	1	1	1.00076	1.00076	1	0.784142	1	1	1	1	0.0880315	0.55581	1	1	0.463453	1.00076	1	1	1.00076	1	1	1	0.876342	1.00076	1	1	1.00076	1.00076	1.00076	1	0.868762	1	1
Node 86	1	1.00499	0.307083	1	1	0.0113148	1	1	1	1	1	1	1	1	1	1	1	1	1.00499	1.00499	1	0.988765	1.00001	0.569146	0.490006	0.416709	1	0.448356	1	1	1	1.00499	1	1.00001	1.00499	1.00001	1	1	0.0284544	1.00499	0.0194349	1	1.00499	1.00499	1.00499	0.862381	0.399935	0.136754	1
Node 87	1	1.00115	0.561126	1	1	1	0.133291	1	1	1	1	1	1	1	1	1	1	1	1.00115	1.00115	1	0.963785	1	1	1	0.156465	1	0.704043	1	1	1	1.00115	1	1	1.00115	1	1	1	0.272213	1.00115	0.233268	1	1.00115	1.00115	1.00115	1	0.809717	0.273779	1
Node 88	1	1.00076	0.680365	1	1	1	0.0909445	1	1	1	1	1	1	0.12125	1	1	1	1	1.00076	1.00076	1	0.784142	1	1	1	0.438001	1	1	1	1	1	1.00076	1	1	1.00076	1	1	1	0.876342	1.00076	1	1	1.00076	1.00076	1.00076	1	0.868762	1	1
Node 89	1	1.00076	0.680365	1	1	1	1	1	1	1	0.00398863	1	1	1	1	1	1	1	1.00076	1.00076	1	0.784142	1	1	1	1	1	0.55581	1	1	0.463453	1.00076	1	1	1.00076	1	1	1	1	1.00076	1	1	1.00076	1.00076	1.00076	1	0.995412	1	1
Node 9	0.284327	1.0023	0.716347	1	1	0.772095	1	1	0.0689636	1	1	1	1	1	1	1	1	1	1.0023	1.0023	1	0.856375	1	1	1	0.822768	1	0.319742	1	1	0.845796	1.0023	0.71955	1	1.0023	1	1	1	0.880899	1.0023	1	1	1.0023	1.0023	1.0023	0.599095	0.655477	0.472807	0.20077
Node 90	0.723813	1.00889	0.964614	1	1	0.773115	0.667475	1	1	0.279917	0.175109	1	1	0.775218	0.430222	0.414279	1	1	1.00889	1.00889	1	0.0603024	1.00004	0.775218	1	0.533234	0.654959	0.691343	1	0.0845069	0.900355	1.00889	0.66527	1.00004	1.00889	1.00004	0.0407327	1	0.735695	1.00889	0.308294	0.493221	1.00889	1.00889	1.00889	0.856842	0.530085	0.692234	0.577655
[truncated: 41 more columns]
