# Supplementary material for: Conservation and Evolution of Cis-Regulatory Systems in Ascomycete Fungi
Source: PLoS Biol. 2004 Nov 9;2(12):e398. doi: 10.1371/journal.pbio.0020398 (PMC526180; doi:10.1371/journal.pbio.0020398)
Supplement: Dataset S29 — (405 KB XLS). [file pbio.0020398.sd029.xls]

## Sheet: Ag_newnewYCHG_500bp-probs
UID	ABF1	ACE2	ADR1	AFT1	ARO80	ASH1	AZF1	BAS1	YAP1	CAT8	CBF1	CHA4	CRZ1	CUP2	DAL80	GATA	ECM22	FKH1	FLO8	FZF1	GAL4	GAT1	GATGAG1	GATGAG2	GCN4	GCR1	GLN3	GZF3	HAC1	HAP1	HAP4	HCM1	HSF1	IME1	INO2/4	LEU3	LYS14	MAC1	MAL63	MATALPHA	MCB	MCM1	MCM1-2	MCM1-3	MET30/31	MET30/31-2	MIG1	MOT3	MSN2/4
Cluster_ManualMethionine	0.99538	1.00383	0.922777	1	1	0.335216	0.391454	0.0542008	0.0230244	0.527445	0.000603784	0.97598	0.502033	0.641219	0.397534	0.665636	0.537639	1	1.00001	1	0.919628	0.264983	1	0.997085	0.0421311	0.626128	0.415187	0.482815	0.170495	0.205218	0.38981	1.00383	0.905101	1	1	1	1	1	0.933457	1.00383	0.615625	0.192873	1.00383	1.00383	0.187416	0.00759563	0.947076	0.781699	0.843597
Cluster_adata-OAC1	0.658194	1.00076	0.984079	1	0.386205	1	0.00307995	0.37513	1	0.415567	1	0.525021	0.438069	0.799423	0.618762	0.376799	1	1	1	1	0.395516	0.767057	1	0.243983	0.644221	0.743953	1	0.870956	1	0.617156	0.544726	1.00076	1	1	1	0.0901353	0.0807998	1	0.986343	1.00076	0.154935	1	1.00076	1.00076	1	0.0200903	0.847308	0.952008	0.813695
Cluster_CBF1	0.509874	1.00306	0.937752	1	0.858408	0.0526838	0.327795	0.0206959	0.231218	0.454594	0.58706	0.77737	0.351381	0.931227	0.682548	0.849515	1	0.0672905	1	1	0.279381	0.345747	0.628017	0.335688	0.104266	0.399647	0.57396	0.598085	0.324991	0.425735	0.256282	1.00306	0.537244	1	1	0.31496	1	0.56003	0.946422	1.00306	0.490679	0.754998	1.00306	1.00306	1	0.0226196	0.849044	0.821229	0.641261
Cluster_adata-Respiration	0.107754	1.00797	0.846679	0.905325	0.317633	0.960502	1	0.474741	1	0.158931	5.6416e-05	0.122794	0.463796	0.804239	0.892357	0.682116	0.0175009	1	1.00003	1	0.0932341	0.884041	0.225962	0.56399	0.722035	0.545042	0.963766	0.617241	0.350621	0.0250278	0.0044072	1.00797	0.474741	0.599255	1	0.624548	1	0.617142	0.867099	1.00797	0.381607	0.663484	1.00797	1.00797	0.349355	0.0236782	0.784115	0.986683	0.918191
Cluster_HAP4	0.121	1.00589	0.883948	0.949512	0.461203	0.459221	0.533441	0.66919	1	0.446858	0.00019424	0.592297	0.374618	0.201206	0.91277	0.67289	0.104809	0.571434	1.00002	1	0.276083	0.960318	0.552763	0.647856	0.70128	0.490271	0.979141	0.478825	0.665987	0.150869	0.00307116	1.00589	0.233133	0.49224	1	1	0.476698	0.191156	0.99528	1.00589	0.478067	0.891946	1.00589	1.00589	0.272797	0.0273261	0.962798	0.999554	0.924585
Cluster_ManualHAP1targets	0.0699001	1.00823	0.842127	0.76449	0.194475	0.596646	1	0.504228	0.445169	0.318542	0.0003937	0.145289	0.496739	0.325541	0.14161	0.17495	0.000815515	0.106656	1.00003	1	0.372358	0.999033	0.46931	0.610973	0.461753	0.640879	0.372358	0.680462	0.829493	0.529569	0.102998	1.00823	0.504228	0.610951	1	1	0.594265	0.35497	0.99097	1.00823	0.32218	0.357768	1.00823	1.00823	1	0.0318385	0.986131	0.985473	0.876731
Cluster_Vacuole	0.0590643	1.01321	0.759941	0.158563	0.0342068	0.873465	1	0.316194	0.347687	0.399423	0.23902	0.0198026	0.399225	0.456017	0.783879	0.985313	0.928296	1	1.00008	1	0.966224	0.362777	0.985371	0.934303	0.204322	0.690602	0.388034	0.468561	0.5552	0.42398	0.559578	1.01321	0.464924	0.778715	1	1	1	0.860456	0.790407	1.01321	0.489864	0.935572	1.01321	1.01321	0.507816	0.0407725	0.498957	0.9509	0.31923
Node 62	0.581553	1.00153	0.9684	1	0.623408	0.291088	1	0.609689	1	0.828449	0.811788	0.393017	1	0.788831	1	1	1	1	1	1	0.634752	0.914822	1	0.625859	0.561047	0.0895123	1	0.646069	0.456332	0.521675	0.710557	1.00153	0.609689	1	1	1	1	1	0.972863	1.00153	0.415766	0.0204273	1.00153	1.00153	1	0.050311	0.83561	0.906286	0.96535
Cluster_MOT3	0.432602	1.0028	0.942795	0.759676	0.508494	0.253138	1	0.488878	1	0.929403	1	0.0716314	0.597807	0.279254	0.619144	0.823746	1	1	1	1	0.524863	0.94063	0.596015	0.494322	0.875343	0.479239	0.524863	0.96475	0.673071	0.616231	0.580415	1.0028	0.206062	1	1	1	0.265996	0.528827	0.950781	1.0028	0.168261	0.926327	1.0028	1.0028	1	0.0504149	0.722019	0.999384	0.31328
Cluster_ROX1	0.349578	1.00102	0.978826	0.404271	1	0.784789	1	1	1	0.904197	1	0.629459	1	0.549797	0.304196	0.104011	1	1	1	1	0.488939	0.702128	1	0.788617	1	0.596809	1	0.679357	1	0.722064	0.951223	1.00102	1	1	1	1	1	1	0.98183	1.00102	0.74125	0.197564	1.00102	1.00102	1	0.0639988	0.321529	0.936521	0.893635
Node 65	0.761066	1.00102	0.978826	1	1	0.784789	1	0.465826	1	0.232737	0.0467546	0.211709	1	0.882631	0.304196	0.104011	1	0.136702	1	1	1	0.702128	1	0.788617	0.333028	0.200204	1	0.679357	1	0.722064	1	1.00102	0.465826	1	1	1	1	1	0.98183	1.00102	0.74125	0.612273	1.00102	1.00102	1	0.0639988	0.951039	0.936521	0.573877
Cluster_HAP3	0.765328	1.00512	0.898323	0.218418	0.170043	0.653514	1	0.571078	0.795909	0.385461	0.19166	0.848797	0.978756	0.0731339	0.297812	0.957573	1	0.521215	1.00001	1	0.185162	0.917368	0.206401	0.0739121	0.550252	0.304495	0.0751407	0.568936	0.869346	0.479898	0.689504	1.00512	0.571078	0.445182	1	1	0.43045	0.384583	0.912222	1.00512	0.369403	0.108335	1.00512	1.00512	0.241864	0.0662424	0.962413	0.719936	0.92063
Cluster_adata-RET3	0.231433	1.00667	0.869793	0.842241	0.0829142	0.298262	1	0.983229	0.60036	0.6557	0.0763654	0.00147751	0.295663	0.382831	0.953698	0.910358	0.737902	0.616418	1.00002	1	0.373846	0.936907	1	0.954267	0.913564	0.945361	0.927298	0.259355	0.0989932	0.264598	0.389382	1.00667	0.749827	0.172711	1	1	0.519223	0.244243	0.887341	1.00667	0.0803159	0.477668	1.00667	1.00667	0.30249	0.0689392	0.530106	0.934143	0.741591
Cluster_Flocculation	1	1.00051	0.989359	1	1	0.535982	1	1	1	1	1	1	0.319003	1	1	1	1	1	1	1	1	0.83797	1	1	1	0.89052	1	1	0.183746	1	0.779018	1.00051	1	1	1	1	1	1	0.990876	1.00051	0.78589	0.044403	1.00051	1.00051	1	0.0739525	0.939093	0.967748	1
Cluster_DOT6	0.0402578	1.00771	0.989225	0.894978	0.67989	0.220319	1	0.262073	0.908091	0.985794	0.887057	0.821298	0.430322	0.988726	0.608961	0.834764	0.447447	0.669184	1.00003	1	0.958277	0.527751	0.426638	0.0685231	0.527361	0.595856	0.313569	0.403883	1	0.995091	0.0183101	1.00771	0.444707	0.587211	1	1	0.570639	0.872228	0.871112	1.00771	0.445849	0.0816046	1.00771	1.00771	0.340236	0.087781	0.902477	0.610472	0.164277
Cluster_tRNAsynth	0.279117	1.00537	0.893507	0.934495	0.967457	0.0963183	1	0.0718951	1	0.636629	0.78808	0.709774	0.145863	0.836082	0.869873	0.609509	0.660683	1	1.00001	1	0.857971	0.459043	1	0.942916	0.247282	0.427428	0.970767	0.956813	0.330707	0.721573	0.875213	1.00537	0.830881	0.461329	1	1	0.4463	1	0.90803	1.00537	0.888778	0.9546	1.00537	1.00537	1	0.0889289	0.0202186	0.708173	0.866554
Node 82	0.918438	1.00178	0.963227	0.596191	0.680027	0.709126	1	1	1	0.891454	0.85756	0.476872	0.107296	0.859781	0.894754	1	1	1	1	1	1	0.983775	1	1	0.114889	0.576112	0.691244	0.991614	0.141002	0.612603	0.955005	1.00178	0.269519	1	1	1	1	0.380368	0.968408	1.00178	0.291832	0.809624	1.00178	1.00178	1	0.0925084	0.932453	0.891531	0.876077
Node 44	0.290065	1.01189	0.780796	0.930753	0.0347291	0.638017	1	0.675142	0.69271	0.0347063	0.00314574	0.193108	0.274816	0.779106	0.757634	0.680346	0.0776403	0.817263	1.00007	1	0.0185959	0.651492	0.716516	0.654556	0.82766	0.297968	0.73576	0.832354	0.281052	0.0132475	0.0628754	1.01189	0.508992	0.386806	1	0.0526873	0.365661	0.184336	0.808955	1.01189	0.408803	0.784111	1.01189	1.01189	0.472174	0.0944809	0.530983	0.993785	0.640468
Cluster_RCS1	0.619419	1.00255	0.947864	0.72637	0.803787	0.665942	1	1	0.54776	0.247611	0.207375	0.382225	0.853853	0.961942	0.547608	1	1	0.307727	1	1	1	0.795161	0.56127	0.673492	1	0.304426	0.191234	0.819331	0.638046	0.281995	0.452153	1.00255	0.791722	1	1	1	0.245041	1	0.955159	1.00255	0.882706	0.355021	1.00255	1.00255	1	0.106252	0.783326	0.84867	0.0790918
Cluster_adata-Chaperones	0.347751	1.00332	0.932735	0.480488	1	0.636485	0.349717	0.582357	1	0.166021	0.0706197	0.960473	0.403065	0.468658	0.117628	0.585429	0.135367	0.380159	1.00001	1	1	0.697748	0.657491	0.841661	0.1477	0.967022	0.03799	0.276619	0.733303	0.4953	0.993779	1.00332	0.00100794	0.3179	1	0.336252	1	1	0.942081	1.00332	0.0781594	0.794474	1.00332	1.00332	1	0.11293	0.802053	0.981918	0.510951
Cluster_adata-ENA1	0.0309725	1.00127	0.9736	1	1	1	0.152401	0.543379	1	0.734075	1	0.30348	0.61745	0.687822	0.131277	1	0.226478	1	1	1	0.567944	0.93992	1	0.856713	0.453929	0.793749	0.0287364	0.489756	0.398169	1	0.226873	1.00127	1	1	1	1	1	1	0.977337	1.00127	0.23731	1	1.00127	1.00127	0.0667575	0.127969	0.242066	0.921281	0.368144
Cluster_Glycerol	0.473348	1.00127	0.9736	1	1	0.853462	0.152401	1	1	0.394881	0.352047	0.00955877	0.61745	0.687822	1	1	1	1	1	1	0.567944	0.64268	1	0.856713	1	0.465515	1	0.967088	0.398169	0.13007	0.226873	1.00127	1	1	1	1	1	0.289502	0.977337	1.00127	1	0.284977	1.00127	1.00127	1	0.127969	0.639379	0.921281	0.110863
Node 81	0.832995	1.00127	0.9736	1	0.556792	0.853462	0.152401	0.0241727	1	0.946727	1	0.30348	0.61745	0.342759	0.799652	1	1	1	1	1	0.567944	0.64268	1	0.516233	0.151676	0.133877	0.567944	0.489756	1	0.798244	0.226873	1.00127	0.543379	1	1	1	0.00719193	1	0.977337	1.00127	0.23731	1	1.00127	1.00127	1	0.127969	0.899872	0.921281	0.368144
Cluster_PDR1	0.450132	1.00204	0.95808	0.252389	0.728145	0.495699	1	0.32708	0.469888	0.768794	0.615013	0.553221	1	0.908225	0.384076	0.329499	0.0571528	0.25483	1	1	1	0.857773	0.482591	0.503327	0.727466	0.746366	0.739011	0.351254	0.556374	0.689641	0.976199	1.00204	0.32708	1	1	1	1	0.421362	0.963972	1.00204	0.97846	1	1.00204	1.00204	1	0.146305	0.890666	0.993161	0.0132384
Cluster_MIG1	0.394675	1.00512	0.898323	0.218418	0.825511	0.81485	0.484529	0.058196	1	0.938351	0.353758	0.264274	0.472644	0.45705	0.48403	0.811922	1	0.521215	1.00001	1	0.0751407	0.169998	1	0.977686	0.0965916	0.00345643	0.373805	0.235669	0.120216	0.839883	0.91803	1.00512	0.809435	0.0188219	1	0.126043	1	0.745858	0.912222	1.00512	0.712796	0.417783	1.00512	1.00512	0.241864	0.149839	0.427149	0.719936	0.334898
Cluster_REB1	0.226428	1.00434	0.91292	1	0.937415	0.279695	1	0.225003	0.740831	0.934234	0.212734	0.311487	0.824946	0.113795	0.520554	0.732849	0.582926	0.465158	1.00001	1	0.942618	0.950498	0.145825	0.289139	0.200667	0.485921	0.261509	0.481737	0.221828	0.968079	0.407472	1.00434	0.930725	1	1	0.415056	0.380156	1	0.924908	1.00434	0.962143	0.728202	1.00434	1.00434	1	0.152654	0.962796	0.756392	0.454257
Cluster_MET4	0.980572	1.0028	0.942795	1	1	0.253138	0.305141	0.206062	0.202275	0.350037	0.266942	0.7329	0.879458	0.507304	0.356843	0.823746	0.43187	1	1	1	1	0.762835	1	0.91349	0.404998	0.717135	0.234574	0.106072	0.287798	0.616231	0.921041	1.0028	0.822006	1	1	1	1	1	0.950781	1.0028	0.928128	0.709137	1.0028	1.0028	0.141111	0.152783	0.890613	0.834838	0.767812
Cluster_SFL1	0.21165	1.0028	0.942795	0.393303	0.508494	0.733627	1	1	0.582309	0.797058	0.266942	0.447902	0.597807	0.737335	0.619144	0.491845	0.43187	1	1	1	0.0756617	0.762835	1	0.91349	0.875343	0.479239	0.524863	0.485201	0.082022	0.847919	0.979484	1.0028	0.0622952	0.276487	1	1	1	0.161345	0.950781	1.0028	0.803216	0.709137	1.0028	1.0028	0.141111	0.152783	0.203207	0.834838	0.138585
Node 13	0.0787728	1.0028	0.942795	1	0.833317	0.91017	1	0.822006	1	0.929403	0.788054	0.7329	0.879458	0.507304	0.356843	0.491845	1	1	1	1	0.842412	0.377791	1	0.91349	0.875343	0.717135	0.524863	0.485201	0.673071	0.616231	0.979484	1.0028	0.822006	1	1	1	0.0354899	1	0.950781	1.0028	0.599933	0.926327	1.0028	1.0028	1	0.152783	0.464691	0.834838	0.767812
Cluster_Mitochondria	0.0195357	1.00849	0.837598	0.372165	0.217183	0.938968	0.291512	0.192427	0.465617	0.516267	0.155106	0.442738	0.107765	0.521321	0.169694	0.730104	0.497585	1	1.00003	1	0.903785	0.696433	0.0416221	0.237636	0.358109	0.906147	0.0230149	0.223121	0.0922566	0.719667	0.756803	1.00849	0.533042	1	1	1	0.605591	0.896082	0.859124	1.00849	0.667544	0.996135	1.00849	1.00849	1	0.160407	0.409228	0.580953	0.587328
Cluster_FKH2	0.942449	1.00693	0.865123	0.653799	0.59411	0.806874	0.591565	0.919568	0.621243	0.0856805	0.324357	0.955604	0.962871	0.970173	0.643951	0.921091	0.394648	0.254315	1.00002	1	0.110435	0.977451	0.892416	0.815937	0.97521	0.853373	0.406734	0.628439	0.260249	0.092363	0.92965	1.00693	0.985678	1	1	0.0494349	1	0.540903	0.883257	1.00693	0.122442	0.192398	1.00693	1.00693	0.31212	0.173552	0.951954	0.641466	0.508138
Cluster_ManualAFT1targets	0.216865	1.00076	0.984079	1	0.0607694	1	1	0.37513	1	1	1	0.525021	1	0.799423	0.618762	0.376799	1	1	1	1	0.395516	0.979797	1	0.688197	0.644221	0.963803	1	0.870956	0.262571	1	1	1.00076	1	0.0843979	1	1	1	1	0.986343	1.00076	0.555728	0.00934324	1.00076	1.00076	1	0.181677	0.427041	0.952008	0.393826
Node 12	0.658194	1.00076	0.984079	1	1	1	1	0.37513	1	0.827747	0.0142838	1	1	0.0711535	0.618762	0.376799	0.142763	1	1	1	1	0.767057	1	1	0.205112	0.743953	1	0.870956	1	1	0.896164	1.00076	0.0569361	1	1	1	1	1	0.986343	1.00076	0.154935	0.508596	1.00076	1.00076	1	0.181677	0.427041	0.952008	0.393826
Node 43	1	1.00076	0.984079	1	1	0.032339	1	1	0.211673	0.415567	1	1	0.438069	0.799423	1	1	1	1	1	1	1	0.767057	1	0.243983	0.644221	0.963803	1	1	1	0.617156	0.896164	1.00076	0.37513	1	1	1	1	1	0.986343	1.00076	1	0.508596	1.00076	1.00076	1	0.181677	0.427041	0.952008	0.393826
Node 54	1	1.00076	0.984079	1	1	0.683972	0.0944227	1	1	0.827747	1	1	0.438069	1	1	1	1	1	1	1	0.395516	0.979797	1	0.688197	0.644221	0.963803	1	1	1	0.617156	0.544726	1.00076	1	1	1	0.0901353	1	1	0.986343	1.00076	0.900971	1	1.00076	1.00076	0.0405964	0.181677	0.847308	0.999228	1
Cluster_ARG80	0.48713	1.00383	0.922777	0.271271	0.39633	0.548382	0.0835735	0.161939	1	0.527445	0.984716	0.218277	0.502033	0.81533	0.824969	0.377409	0.537639	0.0998492	1.00001	1	0.698514	0.63367	0.334627	0.344786	0.252979	0.626128	0.919628	0.288404	0.432484	0.945504	0.0914124	1.00383	0.662617	0.0682779	1	1	1	0.641819	0.997998	1.00383	0.615625	0.856884	1.00383	1.00383	1	0.200623	0.984146	0.976161	0.286017
Cluster_primig-LateSpo	0.254725	1.02421	0.607846	0.942253	0.948456	0.234394	0.807921	0.467742	0.402695	0.992432	0.476253	0.661861	0.337533	0.304984	0.0466614	0.0213964	0.84795	0.23682	1.00028	1	0.682089	0.099727	0.94081	0.504531	0.262632	0.870702	0.682089	0.199217	0.951233	0.983215	0.356147	1.02421	0.353432	0.126511	1	0.318363	0.730168	0.94894	0.935141	1.02421	0.494545	0.769778	1.02421	1.02421	0.723524	0.203601	0.919092	0.21747	0.659221
Cluster_HAP2	0.278059	1.00306	0.937752	1	0.557309	0.789971	1	0.537244	0.614226	0.679546	0.00224008	0.510549	0.900582	0.0702108	0.682548	0.849515	1	1	1	1	0.279381	0.92564	0.243995	0.155121	0.90516	0.399647	0.57396	0.598085	0.704715	0.425735	0.106036	1.00306	0.247051	0.0453901	1	0.31496	0.286374	0.56003	0.946422	1.00306	0.273289	0.479831	1.00306	1.00306	0.152924	0.206049	0.986847	0.821229	0.943293
Node 7	0.611509	1.02804	0.562909	0.0855452	0.322021	0.602966	0.454576	0.00182629	0.286485	0.689485	0.605297	0.566338	0.390557	0.932565	0.549251	0.92189	0.972906	0.901982	1.00037	0.0786365	0.0846216	0.939217	0.973347	0.706106	0.0121914	0.374185	0.194471	0.571794	0.993897	0.539823	0.105355	1.02804	0.269391	0.957472	1	0.847692	0.567909	0.2644	0.611185	1.02804	0.929036	0.220529	1.02804	1.02804	1	0.207192	0.0952122	0.90761	0.00074998
Cluster_IXR1	0.80562	1.00229	0.952959	1	1	0.835645	1	1	1	0.363127	0.68239	0.621311	0.197384	0.55367	0.0706701	0.0306869	1	1	1	1	0.779398	0.451031	1	0.840355	1	0.859031	0.415913	0.08434	1	0.212707	0.122586	1.00229	1	1	1	1	1	1	0.959556	1.00229	0.590992	0.596046	1.00229	1.00229	1	0.209004	0.84028	0.862726	0.818692
Cluster_NRG1	0.960184	1.00229	0.952959	0.300091	0.769037	0.835645	1	1	0.510364	0.841389	0.918437	0.0288288	1	0.79484	0.468696	0.131763	1	0.281762	1	1	0.415913	0.826933	0.154947	0.594228	0.955093	0.959196	1	0.73547	0.59928	0.753573	0.93639	1.00229	0.383336	1	1	1	1	0.459653	0.959556	1.00229	0.332102	0.881554	1.00229	1.00229	1	0.209004	0.0777015	0.862726	0.949955
Cluster_PHO4	0.80562	1.00229	0.952959	0.688458	0.401005	0.586451	0.257534	1	0.510364	0.363127	0.68239	0.89305	1	0.55367	0.468696	0.758246	1	0.281762	1	1	0.779398	0.826933	0.154947	0.321524	0.788459	0.656234	0.415913	0.73547	1	0.212707	0.93639	1.00229	0.756295	0.232583	1	1	1	0.115033	0.959556	1.00229	0.590992	0.881554	1.00229	1.00229	1	0.209004	0.84028	0.862726	0.818692
Cluster_Tryptophan	0.53927	1.00229	0.952959	0.688458	0.14088	0.968539	1	0.0301499	1	0.0455924	0.68239	0.621311	0.0557639	0.94062	0.944734	0.758246	1	1	1	1	0.0372021	0.451031	1	0.594228	0.250596	0.656234	1	0.904918	0.59928	0.069666	0.93639	1.00229	0.130181	1	1	1	1	1	0.959556	1.00229	0.131898	0.881554	1.00229	1.00229	1	0.209004	0.609408	0.862726	0.993567
Node 35	0.509151	1.0188	0.678005	0.375649	0.278037	0.997411	0.90945	0.150867	0.179451	0.0915667	0.488945	0.639073	0.497056	0.0867862	0.417521	0.484156	0.149386	0.484871	1.00017	1	0.002099	0.738677	0.508672	0.88425	0.251363	0.572497	0.435873	0.122133	0.551248	0.0641192	0.94337	1.0188	0.840221	0.346728	1	1	0.321398	0.864547	0.7168	1.0188	0.51817	0.680157	1.0188	1.0188	1	0.215832	0.11695	0.672321	0.0561681
Cluster_adata-CalciumSpecific	0.662899	1.00641	0.874487	0.825737	0.529954	0.569873	1	0.896485	0.578625	0.737297	0.962365	0.93615	0.6591	0.633139	0.377139	0.295809	1	0.60197	1.00002	1	0.765887	0.84422	1	0.413262	0.624452	0.829415	0.765887	0.634876	0.710725	0.719606	0.990003	1.00641	0.724865	1	1	0.545885	1	0.819758	0.891443	1.00641	0.64711	0.80483	1.00641	1.00641	1	0.217744	0.101477	0.938581	0.23405
Cluster_Asparagine	0.300737	1.00025	0.994666	1	0.150114	0.318771	1	0.145034	0.0762002	0.443485	1	1	1	0.414529	0.274829	0.145796	1	1	1	1	1	0.915418	1	1	0.291339	0.669037	1	0.494539	1	0.273813	1	1.00025	1	1	1	1	1	1	0.995428	1.00025	0.537211	0.21082	1.00025	1.00025	0.013716	0.272035	1	0.983744	1
Node 17	1	1.00025	1	1	1	1	1	1	1	0.443485	1	1	1	1	1	1	1	1	1	1	1	0.915418	1	1	1	0.669037	1	1	1	1	0.529845	1.00025	1	1	1	1	1	1	0.995428	1.00025	1	1	1.00025	1.00025	1	0.272035	1	0.983744	1
Node 22	1	1.00025	0.994666	1	1	1	1	1	1	0.443485	1	1	1	1	0.274829	0.145796	1	1	1	1	1	0.915418	1	1	1	1	1	0.494539	1	0.273813	1	1.00025	1	1	1	1	1	1	0.995428	1.00025	0.537211	1	1.00025	1.00025	1	0.272035	0.753112	0.983744	0.428753
Node 42	1	1.00025	0.994666	1	1	0.318771	1	1	1	0.443485	1	1	1	1	1	1	1	1	1	1	1	0.915418	1	0.321819	1	1	1	1	1	0.273813	1	1.00025	1	1	1	1	1	1	0.995428	1.00025	1	1	1.00025	1.00025	1	0.272035	0.753112	0.983744	0.428753
Node 46	1	1.00025	0.994666	1	0.150114	1	1	0.145034	1	0.443485	1	1	1	1	1	1	1	1	1	1	0.154432	0.915418	1	0.321819	0.291339	1	1	0.494539	1	0.273813	0.529845	1.00025	1	1	1	1	1	1	0.995428	1.00025	1	1	1.00025	1.00025	1	0.272035	0.753112	0.983744	0.428753
Node 53	1	1.00025	0.994666	0.121412	1	0.318771	1	0.145034	1	1	0.242824	0.21971	1	1	0.274829	0.145796	1	1	1	1	1	0.915418	1	0.321819	0.291339	0.669037	1	0.494539	1	1	0.529845	1.00025	1	1	1	1	1	1	0.995428	1.00025	0.537211	0.21082	1.00025	1.00025	1	0.272035	0.753112	0.983744	1
Node 90	0.300737	1.00025	0.994666	1	1	0.318771	1	0.145034	1	0.443485	1	1	1	0.414529	1	1	1	1	1	1	1	0.915418	1	1	0.291339	0.669037	1	1	0.0965202	0.273813	0.529845	1.00025	1	1	1	1	1	1	0.995428	1.00025	0.537211	1	1.00025	1.00025	1	0.272035	0.753112	0.983744	1
Cluster_GCN4	0.984809	1.00589	0.883948	0.788016	0.461203	0.293674	0.533441	3.61974e-07	0.532608	0.0828288	0.316116	0.975431	0.374618	0.804928	0.637741	0.236528	0.321018	0.571434	1.00002	1	0.7129	0.692419	0.850159	0.800361	0.000345093	0.490271	0.979141	0.478825	0.90381	0.0707639	0.0113226	1.00589	0.867359	0.49224	1	0.516191	0.132001	0.0609407	0.8997	1.00589	0.884397	0.35316	1.00589	1.00589	0.272797	0.27205	0.962798	0.685212	0.970411
Cluster_ManualYap1Targets	0.984809	1.00589	0.883948	0.000903039	0.11858	0.636109	0.533441	0.867359	0.0061913	0.446858	0.690116	0.777725	0.793158	0.960054	0.971927	0.973629	1	1	1.00002	1	0.0525178	0.997832	0.850159	0.471881	0.70128	0.0785734	0.890936	0.980577	0.665987	0.278663	0.869795	1.00589	0.233133	0.141977	1	0.516191	0.476698	0.191156	0.8997	1.00589	0.947174	0.746316	1.00589	1.00589	0.0388712	0.27205	0.294191	0.947126	0.556543
Node 8	0.414501	1.00771	0.851255	0.0230409	0.850006	0.788835	1	0.133194	0.0232145	0.964012	0.292839	0.921968	0.621806	0.632283	0.44634	0.266149	0.447447	1	0.00764836	1	0.864075	0.997314	1	0.667516	0.683547	0.733895	0.864075	0.803848	1	0.754154	0.810513	1.00771	0.262073	0.054459	1	1	0.570639	0.00275718	0.871112	1.00771	0.997619	0.789551	1.00771	1.00771	1	0.283603	0.530077	0.987833	0.549837
Cluster_Sterols	0.048289	1.00512	0.898323	0.218418	0.825511	0.653514	0.484529	0.571078	1	0.729362	0.19166	0.264274	0.263007	0.790711	0.297812	0.331777	2.55822e-06	0.521215	1.00001	1	0.0751407	0.995116	0.476739	0.476373	0.550252	0.67018	0.185162	0.568936	0.869346	0.676879	0.689504	1.00512	0.809435	1	1	1	0.43045	0.745858	0.912222	1.00512	0.21601	0.417783	1.00512	1.00512	1	0.287828	0.962413	0.959043	0.825857
Node 74	1	1.00102	0.978826	1	0.478415	1	0.123887	0.465826	1	0.598397	0.249612	0.629459	1	0.549797	0.723617	0.467729	1	1	1	1	1	0.702128	1	0.386935	0.333028	0.200204	1	0.679357	0.333802	0.722064	0.730986	1.00102	1	1	1	1	1	1	0.999882	1.00102	1	1	1.00102	1.00102	1	0.299355	0.743576	0.936521	0.893635
Node 87	1	1.00102	0.978826	0.404271	1	0.381521	1	1	1	0.598397	0.671471	1	0.143248	0.882631	1	1	1	1	1	1	1	0.961843	1	0.788617	1	0.891097	1	0.679357	1	0.722064	0.730986	1.00102	1	1	1	1	1	1	0.98183	1.00102	0.370206	1	1.00102	1.00102	1	0.299355	0.743576	0.936521	0.893635
Node 2_fuzzy0.06	0.866824	1.00693	0.865123	0.970021	0.987814	0.0029562	0.591565	0.000166541	0.00326191	0.0856805	0.0430267	0.955604	0.328935	0.928608	0.311617	0.357179	0.751104	1	1.00002	1	0.406734	0.320471	0.892416	0.52127	1.04018e-05	0.743577	0.406734	0.477085	0.936079	0.0419794	0.323545	1.00693	0.772942	0.548882	1	0.203226	0.17084	0.842924	0.883257	1.00693	0.652526	0.517827	1.00693	1.00693	0.31212	0.299859	0.951954	0.641466	0.978826
Node 2	0.800492	1.00434	0.91292	1	0.937415	0.0196002	1	0.00135084	0.00112121	0.317238	0.0100148	0.985408	0.161673	0.774939	0.314918	0.46049	0.582926	1	1.00001	1	0.942618	0.571981	0.753867	0.481434	7.10504e-05	0.485921	0.261509	0.481737	0.822579	0.0653237	0.598895	1.00434	0.456841	0.393805	1	1	0.380156	0.68774	0.924908	1.00434	0.962143	0.496237	1.00434	1.00434	1	0.305456	0.962796	0.756392	0.993453
Cluster_NDD1	1	1.00537	0.893507	0.743294	0.84602	0.344029	0.501373	0.963104	0.21201	0.636629	0.78808	0.306558	0.904129	0.925578	0.725039	0.609509	0.660683	0.538572	1.00001	1	0.651121	0.993639	1	0.715228	0.901153	0.255322	0.651121	0.897227	0.045386	0.344999	0.998487	1.00537	0.363329	1	1	0.484572	0.4463	0.408472	0.90803	1.00537	0.464119	0.05625	1.00537	1.00537	1	0.338082	0.379432	0.708173	0.25273
Cluster_Endocytosis	0.888325	1.0028	0.942795	0.393303	0.508494	0.91017	1	1	0.202275	0.350037	0.0297447	0.934972	0.299206	0.507304	0.97099	1	1	0.332759	1	1	0.524863	0.999888	1	0.986135	0.664872	0.717135	0.842412	0.879857	0.673071	0.353906	0.580415	1.0028	0.488878	0.276487	1	1	1	0.528827	0.950781	1.0028	0.363868	0.418545	1.0028	1.0028	1	0.348775	0.203207	0.834838	0.0450957
Cluster_USV1	0.21165	1.0028	0.942795	1	1	0.253138	1	0.488878	0.582309	0.585816	1	0.447902	0.299206	0.117934	0.619144	1	1	1	1	1	0.524863	0.762835	0.596015	0.740681	0.404998	0.479239	0.234574	0.713411	0.082022	0.616231	0.921041	1.0028	0.206062	1	1	1	1	1	0.950781	1.0028	0.363868	0.926327	1.0028	1.0028	1	0.348775	0.722019	0.999384	0.767812
Cluster_GAT1	0.021088	1.0046	0.90803	0.903218	0.521226	0.727754	1	0.49649	1	0.399989	0.452753	0.93067	0.632664	0.9254	0.577915	0.761926	1	1	1.00001	1	0.298514	0.54233	1	0.736846	0.250619	0.89697	0.541829	0.574585	0.248546	0.907341	0.688892	1.0046	0.49649	0.411434	1	1	1	0.708452	0.920661	1.0046	0.976434	0.160339	1.0046	1.0046	0.220529	0.3611	0.728452	0.744043	0.351297
Cluster_RTS2	0.058354	1.00204	0.95808	0.645306	0.105202	0.780269	1	0.32708	0.469888	0.990851	1	0.553221	0.42055	0.196743	0.384076	0.716884	1	1	1	1	1	0.492798	1	0.503327	0.178465	0.746366	0.356877	0.624839	0.556374	1	0.186991	1.00204	0.32708	0.209651	1	1	0.201336	1	0.963972	1.00204	0.198633	1	1.00204	1.00204	1	0.376964	0.890666	0.877012	0.741951
Cluster_adata-Secretion	0.331216	1.00563	0.888715	0.119108	0.66306	0.751022	0.517672	0.638421	0.825978	0.225869	0.648688	0.549112	0.336948	0.601127	0.992182	0.969098	0.677753	0.555304	1.00002	1	0.683131	0.716348	0.837228	0.760577	0.920594	0.549576	0.975306	0.970844	1	0.761656	0.360823	1.00563	0.398484	1	1	0.500629	1	0.0529855	0.903856	1.00563	0.38738	0.508234	1.00563	1.00563	0.262626	0.38932	0.711811	0.951224	0.0145656
Cluster_adata-ERD2	0.832995	1.00127	0.9736	0.114661	1	0.510099	1	0.155617	1	0.946727	1	1	0.61745	0.342759	0.131277	1	1	1	1	1	0.567944	0.64268	1	0.856713	0.151676	0.793749	0.0287364	0.18059	1	1	0.555855	1.00127	1	0.1367	1	1	1	1	0.977337	1.00127	0.855717	0.284977	1.00127	1.00127	1	0.413612	0.98515	0.921281	0.939286
Cluster_TFs	0.832995	1.00127	0.9736	0.476673	0.556792	0.188653	1	1	1	1	0.751327	0.710953	0.61745	0.687822	0.419476	0.545411	1	1	1	1	0.567944	0.64268	0.0530066	0.192988	0.151676	0.793749	0.172921	0.805758	0.398169	1	0.84774	1.00127	0.543379	1	1	1	1	1	0.977337	1.00127	0.569549	1	1.00127	1.00127	1	0.413612	0.99909	0.921281	0.711032
Node 11	0.163921	1.00127	0.9736	0.476673	1	0.853462	1	0.543379	1	0.394881	0.352047	1	1	0.342759	0.799652	1	1	1	1	1	1	0.93992	0.337452	0.516233	0.151676	0.955996	0.567944	0.805758	0.398169	0.417344	0.977093	1.00127	0.155617	0.1367	1	1	1	1	0.977337	1.00127	0.23731	1	1.00127	1.00127	1	0.413612	0.899872	0.997479	1
Node 59	1	1.00127	0.9736	1	1	0.188653	0.152401	1	1	0.394881	0.0959604	1	0.211913	0.931333	0.419476	0.545411	1	0.167871	1	1	0.567944	0.64268	1	0.516233	0.453929	0.465515	0.567944	0.805758	1	0.417344	0.84774	1.00127	0.543379	0.1367	1	0.1457	1	0.289502	0.977337	1.00127	0.855717	1	1.00127	1.00127	1	0.413612	0.98515	0.921281	0.368144
Cluster_ManualZAP1targets	0.998903	1.00486	0.995612	1	0.316199	0.774516	1	0.7856	0.430886	0.812914	0.15534	0.0389638	0.430717	0.222915	0.0174884	0.047232	0.623798	0.50321	1.00001	0.0144119	0.157656	0.185789	1	0.607899	0.849375	0.551948	0.157656	0.480718	0.275712	0.424179	0.255999	1.00486	0.53463	0.00184627	1	1	1	1	0.916432	1.00486	0.448752	0.797298	1.00486	1.00486	0.231269	0.417208	0.477835	0.731892	0.892198
Cluster_Phospholipid	0.52916	1.00486	0.903164	1	0.559668	0.233943	0.46712	0.7856	1	0.812914	0.305129	0.62781	0.869976	0.381194	0.428165	0.538428	0.0662196	0.0291436	1.00001	1	0.816131	0.513587	0.449705	0.905569	0.946109	0.551948	0.580408	0.80807	0.0304105	0.807283	0.765033	1.00486	0.293075	0.428555	0.0144119	1	1	0.727794	0.916432	1.00486	0.629266	0.989003	1.00486	1.00486	1	0.417208	0.834032	0.731892	0.892198
Cluster_MTH1	0.278059	1.00306	0.937752	1	0.557309	0.934209	1	1	0.614226	0.102809	0.58706	0.25996	0.351381	0.602691	0.978985	1	0.460378	1	1	1	0.57396	0.985599	0.628017	0.796362	0.90516	0.93619	0.866817	0.979036	0.704715	0.425735	0.69098	1.00306	0.847894	0.297496	1	0.31496	1	0.56003	0.946422	1.00306	0.273289	0.754998	1.00306	1.00306	1	0.420137	0.163831	0.821229	0.0851252
Cluster_THI2	0.916121	1.00306	0.937752	0.788936	0.264422	0.149503	0.327795	0.537244	0.614226	0.99076	0.96468	1	0.351381	0.602691	0.212665	0.249639	1	0.356893	1	1	0.279381	0.730274	1	0.573639	0.480723	0.638422	0.57396	0.372317	1	0.978629	0.69098	1.00306	1	1	1	1	1	0.185588	0.946422	1.00306	0.957002	0.941902	1.00306	1.00306	1	0.420137	0.400086	0.98454	0.213429
Cluster_DAL82	0.176604	1.00409	0.917836	0.595727	0.439289	0.403155	1	0.918917	1	0.416049	0.170722	0.716906	0.30168	0.861641	0.259949	0.419445	0.560863	0.445061	1.00001	1	0.458965	0.852138	0.364269	0.413565	0.969582	0.346165	0.458965	0.384519	0.195745	0.119125	0.306009	1.00409	0.697858	0.375653	1	0.396272	1	1	0.929173	1.00409	0.169675	0.687267	1.00409	1.00409	0.198604	0.449893	0.925338	0.973037	0.202568
Cluster_GLN3	0.342443	1.00409	0.917836	0.306257	0.210175	0.0375507	1	0.415928	1	0.416049	0.170722	0.480439	0.548268	0.520838	0.259949	0.419445	0.560863	0.445061	1.00001	1	0.225484	0.602461	1	0.809406	0.519678	0.744542	0.458965	0.384519	0.803539	0.856423	0.688775	1.00409	1	1	1	0.396272	1	0.665564	0.929173	1.00409	0.709724	0.0345813	1.00409	1.00409	1	0.449893	0.415941	0.973037	0.369467
Cluster_PHD1	0.552897	1.00409	0.917836	0.306257	0.71711	0.221984	1	1	1	0.787929	0.928835	0.0425479	0.30168	0.325976	0.460073	0.700806	0.560863	0.445061	1.00001	1	0.732736	0.602461	0.732663	0.92909	0.996005	0.744542	0.458965	0.384519	0.00268658	0.856423	0.0624782	1.00409	0.697858	1	1	1	1	0.665564	0.929173	1.00409	0.709724	0.445176	1.00409	1.00409	1	0.449893	0.204429	0.998027	0.202568
Cluster_adata-TUB	0.271854	1.00229	0.952959	1	0.769037	0.586451	1	0.756295	0.146072	0.363127	0.918437	0.113668	0.822819	0.79484	0.214836	0.758246	0.370282	1	1	1	0.415913	0.451031	1	0.594228	0.51399	0.382822	0.0372021	0.486549	0.213125	0.069666	0.801494	1.00229	0.756295	1	1	0.0297334	1	0.459653	0.999302	1.00229	0.332102	0.596046	1.00229	1.00229	1	0.460944	0.307574	0.862726	0.993567
Cluster_FZF1	0.271854	1.00229	0.952959	0.300091	0.769037	0.968539	0.0325092	0.383336	1	0.623603	0.68239	0.0288288	0.822819	0.297453	0.468696	0.758246	0.370282	1	1	1	0.779398	0.965714	1	0.840355	0.250596	0.656234	0.415913	0.73547	0.59928	0.944032	0.93639	1.00229	0.130181	1	1	1	0.223493	0.459653	0.959556	1.00229	0.988927	0.881554	1.00229	1.00229	0.116996	0.460944	0.953649	0.862726	0.329162
Cluster_RME1	0.960184	1.00229	0.999046	0.688458	0.401005	0.314194	1	1	1	0.155652	0.918437	0.89305	0.484312	0.297453	0.755699	1	1	1	1	1	0.415913	0.451031	1	0.969785	0.955093	0.146128	0.415913	0.486549	0.213125	0.46588	0.987573	1.00229	0.756295	0.232583	1	1	1	1	0.959556	1.00229	0.590992	0.596046	1.00229	1.00229	0.116996	0.460944	0.84028	0.991298	0.818692
Cluster_SKO1	0.960184	1.00229	0.952959	1	1	0.835645	1	0.756295	1	0.958328	0.68239	0.0288288	0.197384	0.116175	0.944734	0.758246	1	0.281762	1	1	0.415913	0.965714	0.154947	0.594228	0.955093	0.146128	1	0.73547	1	0.944032	0.93639	1.00229	1	1	1	1	0.223493	1	0.959556	1.00229	0.813949	0.881554	1.00229	1.00229	1	0.460944	0.609408	0.862726	0.329162
Cluster_Galactose	1	1.00051	0.989359	1	1	0.10156	1	1	1	0.196616	1	1	0.319003	0.657285	0.474177	0.270368	1	0.0708441	1	1	0.285048	0.83797	1	0.540125	1	1	1	0.744573	1	0.472702	0.280672	1.00051	1	1	1	1	1	1	0.990876	1.00051	1	1	1.00051	1.00051	0.0272474	0.470117	0.939093	0.967748	1
Cluster_ManualM-G1genes	0.511084	1.00051	0.989359	1	1	1	1	1	1	0.196616	0.426732	1	1	0.657285	0.474177	0.270368	1	1	1	1	1	0.83797	1	0.540125	0.497851	0.447555	1	0.244505	1	0.472702	0.779018	1.00051	0.269065	1	1	1	1	1	0.990876	1.00051	0.78589	1	1.00051	1.00051	1	0.470117	0.56713	0.967748	0.673739
Node 16	1	1.00051	0.989359	1	0.277727	1	1	1	1	0.690354	0.058917	0.391192	1	1	0.474177	0.270368	1	0.0708441	1	1	1	0.992866	1	0.540125	1	0.89052	1	0.744573	1	0.472702	0.779018	1.00051	0.269065	1	1	1	1	1	0.990876	1.00051	0.288533	1	1.00051	1.00051	1	0.470117	0.939093	0.967748	0.183767
Node 60	0.511084	1.00051	0.989359	0.228111	0.277727	1	1	0.269065	1	1	0.426732	0.391192	0.319003	0.657285	1	1	1	1	1	1	1	0.83797	1	1	0.0848257	0.89052	1	0.744573	0.183746	1	0.779018	1.00051	1	0.0570808	1	1	0.0546124	1	0.990876	1.00051	0.78589	1	1.00051	1.00051	1	0.470117	0.56713	0.967748	0.673739
Node 61	1	1.00051	0.989359	1	1	0.535982	1	1	1	0.196616	0.058917	0.391192	1	1	1	1	1	1	1	1	1	0.83797	1	0.540125	1	0.447555	1	0.744573	1	0.0749228	1	1.00051	0.0210034	1	1	1	1	1	0.990876	1.00051	0.78589	1	1.00051	1.00051	1	0.470117	0.56713	0.967748	0.183767
Node 69	1	1.00051	0.989359	1	1	0.10156	1	1	1	0.196616	1	1	1	0.171772	0.474177	1	1	1	1	1	1	0.83797	1	0.540125	1	0.447555	0.285048	0.744573	1	0.0749228	0.779018	1.00051	1	1	1	1	1	0.127735	0.990876	1.00051	1	1	1.00051	1.00051	1	0.470117	0.56713	0.967748	0.183767
Cluster_SWI6	0.586797	1.00512	0.898323	1	0.961674	0.653514	1	0.956808	0.1918	0.230221	0.97184	0.848797	0.70545	0.288481	0.48403	0.811922	0.2644	0.521215	1.00001	1	0.838271	0.917368	1	0.977686	0.958195	0.156104	0.373805	0.858246	0.588688	0.294168	0.997352	1.00512	0.809435	1	1	0.468002	0.104481	1	0.912222	1.00512	0.106636	0.232132	1.00512	1.00512	0.241864	0.472657	0.795986	0.719936	0.825857
Cluster_Maltose	0.799568	1.00332	0.932735	0.81464	0.602569	0.836017	1	0.870022	1	0.166021	0.861447	0.314994	1	0.26305	0.498653	0.871523	1	1	1.00001	1	0.324863	0.316413	0.657491	0.645364	0.928199	0.900219	0.324863	0.483964	0.733303	0.4953	0.90837	1.00332	0.870022	0.3179	1	1	1	1	0.942081	1.00332	0.974794	0.118469	1.00332	1.00332	1	0.489421	0.594708	0.807839	0.722705
Cluster_MCM1	0.937313	1.00332	0.932735	0.81464	0.602569	0.402838	0.349717	0.870022	1	0.757778	0.391647	0.815217	0.403065	0.686462	0.498653	0.585429	0.487462	0.380159	1.00001	1	0.887448	0.980558	1	0.954234	0.928199	0.14227	0.324863	0.950195	0.123326	0.4953	0.993779	1.00332	0.870022	1	1	0.336252	0.306192	1	0.942081	1.00332	0.608088	0.794474	1.00332	1.00332	1	0.489421	0.802053	0.807839	0.722705
Cluster_FattyAcid	0.154017	1.00615	0.879206	0.807698	0.0568249	0.826865	0.548699	0.467528	0.85163	0.520415	0.20799	0.806652	0.625572	0.845699	0.503603	0.884678	0.115581	1	1.00002	1	0.00696406	0.66842	1	0.974279	0.74318	0.866242	0.308271	0.711801	0.412671	0.828466	0.958479	1.00615	0.697999	0.507029	0.0181814	0.531271	0.0273769	0.47722	0.895563	1.00615	0.00240002	0.975069	1.00615	1.00615	1	0.491171	0.256956	0.674008	0.179988
Cluster_STP2	0.997749	1.00434	0.91292	0.889778	0.937415	0.0196002	0.430533	0.930725	1	0.840673	0.0936999	0.311487	0.824946	0.774939	0.88611	0.93177	1	1	1.00001	1	0.942618	0.950498	0.393394	0.289139	0.776284	0.0456878	0.763597	0.973041	0.822579	0.726047	0.111477	1.00434	0.729994	1	1	0.415056	1	1	0.924908	1.00434	0.900275	0.728202	1.00434	1.00434	0.209641	0.510076	0.775158	0.756392	0.809043
Cluster_Isoleucine	0.256938	1.00153	0.9684	1	0.0473016	0.291088	1	0.043194	0.378658	0.545327	0.449023	1	0.684387	0.788831	0.523995	0.611773	0.0327038	1	1	1	1	0.588252	0.389856	0.625859	0.0636599	0.685145	0.233902	0.333443	1	0.853557	0.0220507	1.00153	1	1	1	0.172207	1	0.336483	0.972863	1.00153	0.415766	0.758669	1.00153	1.00153	1	0.517605	0.182227	0.906286	0.96535
Cluster_PentosePhosphate	0.883283	1.00153	0.9684	0.540292	0.623408	0.900233	1	1	0.00736597	0.828449	0.811788	0.124408	0.282768	0.485804	0.854783	0.611773	1	1	1	1	1	0.914822	1	0.902884	0.87354	0.902354	0.634752	0.646069	1	0.853557	0.916332	1.00153	1	1	1	1	1	1	0.972863	1.00153	0.990219	1	1.00153	1.00153	1	0.517605	0.182227	0.906286	0.515171
Cluster_CIN5	0.804326	1.00537	0.893507	0.934495	0.630669	0.704999	1	1	0.483287	0.636629	0.78808	0.00806627	0.145863	0.836082	0.0939194	0.181155	1	0.538572	1.00001	1	0.21425	0.972433	0.823186	0.942916	0.967702	0.880682	0.21425	0.47975	0.137823	0.344999	0.609404	1.00537	0.605703	1	1	0.0256905	1	0.762727	0.90803	1.00537	0.16533	0.67528	1.00537	1.00537	1	0.526487	0.0784567	0.955198	0.744464
Cluster_SIP4	0.973592	1.00537	0.893507	0.478169	0.0824314	0.704999	1	0.830881	0.483287	0.167674	0.78808	0.306558	0.982488	0.107985	0.348966	0.833229	1	1	1.00001	1	0.857971	0.904411	0.50295	0.204802	0.414578	0.0479074	0.21425	0.47975	0.330707	0.344999	0.762322	1.00537	0.178346	1	1	1	1	0.762727	0.90803	1.00537	0.888778	0.05625	1.00537	1.00537	1	0.526487	0.19986	0.708173	0.25273
Cluster_ACE2	0.352256	1.00255	0.947864	0.347253	0.803787	0.978591	1	0.437457	0.54776	0.247611	0.452833	0.681082	0.853853	0.995306	0.807722	1	1	1	1	1	0.0546137	0.795161	0.184037	0.409278	0.327307	0.791965	0.472083	0.941598	1	0.281995	0.963545	1.00255	0.0446147	1	1	1	1	0.495419	0.955159	1.00255	0.994368	0.906582	1.00255	1.00255	1	0.539561	0.925711	0.84867	0.0790918
Cluster_MAC1	0.352256	1.00255	0.947864	1	0.456285	0.878071	1	1	0.54776	0.893309	1	0.681082	0.853853	0.191262	0.0311052	0.440297	0.401864	1	1	1	0.813544	0.412795	1	0.979531	1	0.565747	0.0110848	0.0507359	0.638046	0.805794	0.963545	1.00255	0.791722	1	1	1	0.245041	0.495419	0.955159	1.00255	0.0858296	0.656302	1.00255	1.00255	1	0.539561	0.925711	0.989236	0.687229
Cluster_MET31	1	1.00255	0.947864	0.111444	0.456285	0.665942	1	0.0446147	0.0351525	0.720243	0.0169531	0.15783	0.0187184	0.961942	0.110235	0.440297	1	0.307727	1	1	0.472083	0.412795	0.184037	0.409278	0.0410776	0.565747	0.191234	0.16275	1	0.281995	0.694193	1.00255	0.437457	0.254855	1	1	0.245041	1	0.955159	1.00255	0.47117	0.906582	1.00255	1.00255	1	0.539561	0.783326	0.84867	0.875034
Node 72	0.0021603	1.03982	0.814344	0.0311084	0.556943	0.402429	0.204711	0.486238	0.234803	0.313786	0.304307	0.925158	0.831882	0.909773	0.43346	0.496959	0.760197	0.624836	1.00074	1	0.523029	0.393333	0.909691	0.710285	0.467235	0.986036	0.61473	0.869002	0.461614	0.643893	0.063261	1.03982	0.98782	0.988125	1	0.845444	0.114107	0.772902	0.854769	1.03982	0.749927	0.55011	1.03982	1.03982	0.875499	0.551793	0.42574	0.781032	0.302227
Cluster_AZF1	0.993383	1.00357	0.927743	0.521107	0.897843	0.700148	0.370929	0.624143	1	0.820643	0.453344	0.0654918	0.081362	0.348248	0.784988	0.627206	0.513193	0.40259	1.00001	1	0.0518104	0.891331	1	0.877952	0.945875	0.696897	0.660737	0.199736	0.0391444	0.929136	0.941845	1.00357	0.624143	1	1	0.356889	1	0.235304	0.998261	1.00357	0.0519346	0.153806	1.00357	1.00357	1	0.554999	0.750904	0.794663	0.389857
Cluster_CHA4	0.647431	1.00357	0.927743	0.0797587	0.352533	0.477326	1	0.624143	1	0.644621	0.69814	0.175379	0.218199	0.558966	0.334311	0.135159	0.513193	0.40259	1.00001	1	0.0518104	0.891331	0.684637	0.277204	0.822142	0.696897	0.904887	0.199736	0.75913	0.929136	0.689361	1.00357	1	0.337716	1	0.356889	1	0.235304	0.93776	1.00357	0.302191	0.828216	1.00357	1.00357	1	0.554999	0.53223	0.794663	0.78989
Cluster_SIG1	0.84106	1.00357	0.997627	0.521107	0.897843	0.965227	0.370929	0.888936	1	0.930884	0.453344	0.623318	0.218199	0.897145	0.784988	0.627206	1	0.40259	1.00001	1	0.370326	0.289562	0.0927024	0.708596	0.99202	0.48301	0.904887	0.96877	1	0.929136	0.983308	1.00357	0.0408522	1	1	0.356889	1	0.616396	0.93776	1.00357	0.143721	1	1.00357	1.00357	0.176075	0.554999	0.289737	0.794663	0.601772
Cluster_PUT3	0.670291	1.0046	0.90803	0.166396	0.946851	0.727754	0.449127	0.107428	0.760665	0.234486	0.849984	0.581685	0.0786121	0.67298	0.371416	0.500232	1	1	1.00001	1	0.131992	0.809185	0.421901	0.546652	0.433114	0.420363	0.131992	0.574585	0.530195	0.0903123	0.83249	1.0046	0.759182	0.411434	1	1	0.397392	1	0.920661	1.0046	0.534259	0.160339	1.0046	1.0046	1	0.567374	0.530963	0.966329	0.0927194
Node 32	0.941223	1.0046	0.90803	0.903218	0.521226	0.184161	1	0.258596	0.760665	0.882226	0.452753	0.360014	0.848982	0.825919	0.0919939	0.00996401	1	0.484533	1.00001	1	0.951518	0.54233	1	0.736846	0.250619	0.420363	0.951518	0.388889	0.530195	0.907341	0.0787881	1.0046	0.49649	0.411434	1	1	1	0.111473	0.920661	1.0046	0.711055	0.764807	1.0046	1.0046	1	0.567374	0.315872	0.744043	0.940969
Cluster_Lysine	1	1.00178	0.963227	1	1	0.709126	1	0.0106482	0.426077	0.891454	0.85756	0.183377	1	0.110798	1	1	0.302055	1	1	1	0.295799	0.983775	1	0.715077	0.114889	0.267535	1	0.934008	1	0.612603	0.819647	1.00178	0.666384	1	1	1	0.0006664	0.0731689	0.968408	1.00178	0.830072	0.809624	1.00178	1.00178	0.092218	0.60846	0.987895	0.891531	0.126583
Cluster_adata-TRP4	0.432602	1.0028	0.942795	1	0.0693356	0.48545	0.305141	0.00218719	0.045674	0.162255	0.522542	0.934972	0.597807	0.737335	0.356843	0.0633235	1	1	1	1	0.234574	0.377791	0.213816	0.260452	0.0685445	0.238872	1	0.879857	0.287798	0.0127446	0.789007	1.0028	0.488878	1	1	1	1	0.528827	0.950781	1.0028	0.168261	0.418545	1.0028	1.0028	0.141111	0.611106	0.967828	0.834838	0.915242
Cluster_IME4	0.689476	1.0028	0.942795	0.140027	0.508494	0.985433	0.00457439	0.822006	0.582309	0.929403	0.522542	0.934972	0.879458	0.899585	0.97099	0.823746	0.101806	0.332759	1	1	0.234574	0.762835	1	0.494322	0.664872	0.991673	1	0.96475	1	1	0.921041	1.0028	0.0622952	1	1	1	1	0.528827	0.950781	1.0028	0.981801	0.709137	1.0028	1.0028	1	0.611106	0.993053	0.986981	0.546207
Cluster_SFP1	0.432602	1.0028	0.942795	0.0352236	0.833317	0.985433	0.305141	0.822006	0.045674	0.929403	0.953311	0.934972	0.597807	0.507304	0.849629	1	0.101806	1	1	1	0.234574	0.377791	0.596015	0.494322	0.191348	0.238872	0.524863	0.879857	1	0.970539	0.789007	1.0028	0.488878	1	1	1	1	0.528827	0.950781	1.0028	0.99716	0.709137	1.0028	1.0028	1	0.611106	0.722019	0.834838	0.546207
Cluster_STE12	0.888325	1.0028	0.942795	0.140027	0.833317	0.48545	1	0.488878	0.582309	0.585816	0.953311	0.934972	0.597807	0.899585	0.356843	1	1	1	1	1	0.0756617	0.377791	0.596015	0.986135	0.875343	0.991673	0.0756617	0.713411	0.082022	0.847919	0.789007	1.0028	0.488878	1	1	1	1	1	0.950781	1.0028	0.363868	0.418545	1.0028	1.0028	1	0.611106	0.722019	0.834838	0.31328
Node 15	0.432602	1.0028	0.942795	1	0.0157987	0.253138	1	1	1	0.350037	0.266942	0.7329	0.597807	0.975799	0.849629	0.823746	1	0.332759	1	1	0.842412	0.94063	0.596015	0.740681	0.875343	0.479239	0.842412	0.96475	0.287798	0.15615	0.580415	1.0028	0.488878	1	1	0.0436309	1	0.528827	0.950781	1.0028	0.363868	0.0613461	1.0028	1.0028	1	0.611106	0.203207	0.834838	0.980562
Cluster_Thiamine	1	1.00076	0.984079	1	1	0.683972	1	0.37513	1	0.415567	1	1	1	0.799423	0.185008	0.0575042	1	1	1	1	0.395516	0.767057	1	0.688197	0.644221	0.299356	0.395516	0.491807	0.262571	0.183794	0.544726	1.00076	1	1	1	1	1	0.185368	0.986343	1.00076	0.900971	1	1.00076	1.00076	1	0.614336	0.847308	0.952008	0.393826
Node 26	1	1.00076	0.984079	0.321875	1	0.240001	1	1	0.016489	0.415567	0.566006	1	0.438069	0.0711535	0.618762	1	1	1	1	1	1	0.767057	1	0.688197	0.205112	0.743953	0.395516	0.870956	0.0260964	0.183794	0.896164	1.00076	1	1	1	1	1	1	0.986343	1.00076	0.154935	0.508596	1.00076	1.00076	1	0.614336	0.427041	0.952008	0.393826
Node 30	0.658194	1.00076	0.984079	1	1	0.683972	1	1	1	0.827747	0.566006	0.525021	1	0.37301	0.618762	0.376799	0.142763	1	1	1	0.395516	0.979797	1	1	1	1	1	0.491807	1	0.617156	0.544726	1.00076	0.37513	1	1	1	1	1	0.986343	1.00076	0.555728	1	1.00076	1.00076	1	0.614336	0.847308	0.952008	1
Node 37	0.658194	1.00076	0.984079	1	1	0.240001	0.0944227	0.37513	1	0.415567	0.566006	1	1	0.0711535	0.185008	1	1	1	1	1	1	0.767057	1	1	0.644221	0.963803	0.064113	0.491807	1	0.183794	1	1.00076	1	1	1	1	1	1	0.986343	1.00076	1	0.508596	1.00076	1.00076	0.0405964	0.614336	0.427041	0.952008	0.393826
Node 89	0.658194	1.00076	0.984079	1	1	0.240001	1	1	0.211673	0.827747	0.566006	0.525021	0.438069	0.0711535	1	1	1	1	1	1	1	0.979797	0.0176877	0.243983	0.644221	0.299356	1	1	1	0.617156	0.544726	1.00076	1	1	1	1	1	1	0.986343	1.00076	0.555728	0.508596	1.00076	1.00076	1	0.614336	0.984986	0.952008	0.0787372
Cluster_STP1	0.48713	1.00383	0.922777	0.857054	0.177344	0.335216	0.391454	0.905101	0.318668	0.95317	0.910849	0.218277	0.766369	0.81533	0.207865	0.164213	1	0.0998492	1.00001	1	0.698514	0.264983	1	0.763163	0.858256	0.411451	0.698514	0.0540565	0.432484	0.822744	0.38981	1.00383	0.662617	1	1	1	1	0.641819	0.933457	1.00383	0.7907	0.0756708	1.00383	1.00383	0.187416	0.615761	0.472333	0.781699	0.843597
Node 38	0.874894	1.00383	0.922777	0.559543	0.682382	0.335216	1	0.0542008	0.0230244	0.327309	0.132603	0.874066	0.766369	0.248434	0.0882394	0.00299313	1	0.0151987	1.00001	1	1	0.264983	0.334627	0.90665	0.000496031	0.214337	0.415187	0.482815	0.170495	0.205218	0.0914124	1.00383	0.905101	1	1	0.0768905	1	0.641819	0.933457	1.00383	0.7907	0.97152	1.00383	1.00383	1	0.615761	0.947076	0.781699	0.286017
Node 14	0.868892	1.00486	0.903164	0.411002	0.316199	0.40264	1	0.949439	0.778986	0.307841	0.713611	0.223652	0.227536	0.736435	0.809933	0.950291	1	1	1.00001	1	0.580408	0.92939	0.791377	0.782898	0.987466	0.977473	0.580408	0.965009	0.560134	0.0170314	0.88155	1.00486	0.7856	1	1	0.450904	0.0957029	0.727794	0.916432	1.00486	0.629266	0.591522	1.00486	1.00486	1	0.621005	0.679722	0.962756	0.987669
Cluster_ManualZAP1targets-2	0.962471	1.01189	0.975641	0.672634	0.0347291	0.513149	1	0.675142	0.69271	0.806209	0.580554	0.300434	0.412833	0.0918194	0.102153	0.0619579	0.406855	0.817263	1.00007	0.0346528	0.0866656	0.446179	0.889151	0.654556	0.950021	0.541462	0.417721	0.747323	0.661497	0.258589	0.264476	1.01189	0.347759	0.00991501	1	1	1	0.95764	0.808955	1.01189	0.526503	0.880803	1.01189	1.01189	0.472174	0.623559	0.162946	0.468462	0.405478
Node 67	0.0361367	1.00693	0.991221	0.418781	0.793974	0.507571	0.591565	0.564908	0.883213	0.0856805	0.821433	0.380352	0.328935	0.447781	0.473316	0.569351	0.394648	0.0714869	1.00002	1	0.406734	0.320471	0.641476	0.98888	0.711985	0.925591	0.406734	0.111804	0.491253	0.790473	0.92965	1.00693	0.919568	0.548882	1	1	1	0.842924	0.993523	1.00693	0.351864	0.517827	1.00693	1.00693	0.31212	0.63172	0.797812	0.641466	0.00350686
Cluster_mRNAprocessing	0.732924	1.01906	0.674321	0.893568	0.972614	0.0592297	0.693537	0.629451	0.663871	0.48637	0.407194	0.761671	0.51879	0.949033	0.345881	0.373881	0.500696	0.747427	1.00017	1	0.710423	0.408288	0.840482	0.688839	0.761378	0.439509	0.45607	0.285478	0.720615	0.821606	0.0835819	1.01906	0.0551925	0.630723	1	0.18916	0.142435	0.533972	0.713462	1.01906	0.810837	0.796414	1.01906	1.01906	0.638538	0.634253	0.560635	0.885485	0.983351
Cluster_SKN7	0.894783	1.00512	0.898323	0.92539	0.596185	0.287678	1	0.571078	0.795909	0.729362	0.556049	0.264274	0.263007	0.288481	0.48403	0.811922	0.2644	1	1.00001	1	0.185162	0.977482	0.807937	0.822442	0.550252	0.67018	0.373805	0.732807	0.303152	0.154251	0.826831	1.00512	0.571078	1	1	1	0.104481	0.141644	0.912222	1.00512	0.843467	0.417783	1.00512	1.00512	1	0.670454	0.234064	0.719936	0.0383143
Cluster_ADR1	0.342443	1.00409	0.917836	0.0360943	0.71711	0.614394	1	0.697858	0.719359	0.416049	0.343939	0.896517	0.797526	0.861641	0.460073	0.700806	1	0.445061	1.00001	1	1	0.242484	0.732663	0.230153	0.730357	0.346165	0.225484	0.581111	1	0.256874	0.688775	1.00409	1	0.375653	1	1	0.362432	0.285648	0.929173	1.00409	0.521526	0.445176	1.00409	1.00409	1	0.671051	0.415941	0.973037	0.0914007
Cluster_GeneralTFs	0.614911	1.00615	0.879206	0.807698	0.895062	0.826865	1	0.467528	0.556038	0.678619	0.360638	0.437295	0.412261	0.845699	0.503603	0.701612	0.115581	0.213821	1.00002	1	0.904615	0.953221	0.576317	0.358581	0.575582	0.00509968	0.519945	0.559546	0.412671	0.678476	0.818386	1.00615	0.467528	0.507029	1	1	1	1	0.895563	1.00615	0.998984	0.394926	1.00615	1.00615	1	0.671452	0.980848	0.94291	0.461623
Cluster_adata-G1DNAreplication	0.278059	1.00306	0.937752	0.788936	0.264422	0.934209	0.327795	0.537244	0.231218	0.454594	0.328987	0.25996	0.900582	0.931227	0.682548	0.540286	1	0.356893	1	1	0.866817	0.92564	1	0.335688	0.480723	0.827334	0.866817	0.921893	0.704715	0.425735	0.69098	1.00306	0.847894	1	1	0.31496	1	0.56003	0.946422	1.00306	0.273289	0.234687	1.00306	1.00306	1	0.674763	0.849044	0.98454	0.988016
Cluster_ARG81	0.916121	1.00306	0.937752	0.788936	0.858408	0.564593	0.05594	0.0830948	1	0.24548	0.828253	1	0.647093	0.602691	0.682548	0.249639	0.460378	0.356893	1	1	0.10015	0.730274	0.628017	0.335688	0.480723	0.00797616	1	0.372317	0.704715	0.210248	0.69098	1.00306	0.537244	0.297496	1	1	1	1	0.998732	1.00306	0.957002	0.754998	1.00306	1.00306	1	0.674763	0.849044	0.98454	0.413132
Cluster_BAS1	0.509874	1.00306	0.937752	0.437816	0.264422	0.327163	1	0.247051	1	0.679546	0.328987	0.25996	1	0.804656	0.682548	0.540286	0.460378	0.356893	1	1	0.00531296	0.345747	0.628017	0.573639	0.480723	0.399647	0.57396	0.795786	1	0.67973	0.469849	1.00306	0.247051	0.297496	1	1	0.286374	0.185588	0.946422	1.00306	0.957002	0.234687	1.00306	1.00306	1	0.674763	0.400086	0.821229	0.213429
Cluster_Purine	0.749343	1.00306	0.937752	0.788936	0.264422	0.990089	1	0.00384321	1	0.855814	0.58706	0.25996	1	0.602691	0.978985	1	0.460378	1	1	1	0.279381	0.345747	1	0.335688	0.00773517	0.638422	0.866817	0.795786	1	0.881557	0.256282	1.00306	0.847894	1	1	1	0.286374	0.185588	0.946422	1.00306	0.870381	0.941902	1.00306	1.00306	1	0.674763	0.163831	0.821229	0.641261
Cluster_SMP1	0.509874	1.00306	0.998268	0.788936	0.557309	0.934209	1	0.847894	1	0.454594	0.828253	0.77737	0.647093	0.602691	0.883045	0.849515	0.118284	1	1	1	0.866817	0.730274	1	0.796362	0.90516	0.93619	0.866817	0.795786	1	0.881557	0.952049	1.00306	0.847894	0.297496	1	1	1	0.56003	0.946422	1.00306	0.990068	0.754998	1.00306	1.00306	1	0.674763	0.986847	0.98454	0.213429
Node 10	0.195236	1.00204	0.95808	1	0.728145	0.0736296	1	1	1	0.247863	0.103903	0.553221	0.785207	0.71445	0.691921	0.716884	1	1	1	1	0.356877	0.857773	0.482591	0.0162676	1	0.47396	0.739011	0.624839	0.556374	0.149133	0.700018	1.00204	0.32708	1	1	1	1	1	0.963972	1.00204	0.447165	0.528179	1.00204	1.00204	1	0.685625	0.890666	0.877012	0.741951
Node 9	0.450132	1.00204	0.95808	0.645306	0.728145	0.229307	1	0.714856	1	0.507836	0.024004	0.862856	0.785207	0.439796	0.691921	0.716884	1	1	1	1	0.356877	0.857773	0.482591	0.0162676	0.936578	0.746366	0.739011	0.351254	0.556374	0.381489	0.700018	1.00204	0.32708	1	1	1	1	1	0.963972	1.00204	0.447165	0.849831	1.00204	1.00204	1	0.685625	0.890666	0.877012	0.920786
Cluster_primig-EarlySpo	0.325628	1.00641	0.992449	0.961092	0.907881	0.938018	1	0.291892	0.117857	0.282836	0.590139	0.671278	0.991917	0.87937	0.120473	0.505368	0.724003	1	1.00002	1	0.0294148	0.644447	1	0.98047	0.288469	0.547724	0.0294148	0.0476215	0.216905	0.223893	0.972193	1.00641	0.980363	1	1	0.545885	1	1	0.891443	1.00641	0.490846	0.436574	1.00641	1.00641	1	0.712889	0.57555	0.662984	0.531402
Cluster_ManualG1genes	0.833432	1.01058	0.802194	0.967585	0.266377	0.568274	0.387307	0.729841	0.614856	0.801115	0.901395	0.914002	0.867775	0.680419	0.213383	0.734308	0.879453	0.438807	1.00005	1	0.991491	0.538677	0.846713	0.946961	0.551723	0.498206	0.0176863	0.242636	0.0390773	0.591103	0.844691	1.01058	0.558529	1	1	0.726737	1	0.764757	0.827914	1.01058	0.0784665	0.891175	1.01058	1.01058	1	0.713847	0.699694	0.857338	0.998605
Cluster_RIM101	0.916066	1.00537	0.893507	0.934495	0.967457	0.0963183	0.501373	0.178346	0.811541	0.996349	0.78808	0.503833	0.513357	0.107985	0.348966	0.367218	0.660683	0.538572	1.00001	1	1	0.459043	0.823186	0.855946	0.604522	0.255322	0.651121	0.177532	1	0.953582	0.0679628	1.00537	0.363329	0.461329	1	1	1	0.408472	0.996061	1.00537	0.998786	0.46358	1.00537	1.00537	1	0.715444	0.948207	0.708173	0.583839
Cluster_Flavin	0.0841521	1.00102	0.978826	1	1	0.381521	1	1	0.27179	0.232737	1	1	1	1	0.00568197	0.467729	1	1	1	1	1	0.702128	0.280563	0.386935	0.747952	0.596809	0.0129788	0.0597207	1	0.302434	0.358466	1.00102	0.465826	1	1	1	1	1	0.98183	1.00102	1	0.612273	1.00102	1.00102	1	0.71933	0.951039	0.936521	0.213775
Cluster_Glutathione	0.349578	1.00102	0.978826	1	1	0.0984803	1	0.465826	1	0.598397	0.671471	0.211709	1	0.882631	0.304196	0.104011	1	1	1	0.00304568	0.115247	0.961843	1	0.788617	0.333028	0.596809	1	0.304256	1	0.722064	0.358466	1.00102	1	1	1	0.118352	1	0.239208	0.98183	1.00102	0.74125	0.197564	1.00102	1.00102	1	0.71933	0.743576	0.936521	0.213775
Cluster_Heme	0.761066	1.00102	0.999838	1	1	1	1	0.465826	0.27179	0.598397	0.671471	1	1	0.882631	0.304196	0.467729	0.18569	1	1	1	0.488939	0.961843	1	0.788617	0.747952	0.891097	0.488939	0.679357	1	0.302434	0.358466	1.00102	0.465826	1	1	1	1	1	0.98183	1.00102	0.370206	0.612273	1.00102	1.00102	1	0.71933	0.996302	0.936521	1
Cluster_Polyamine	0.761066	1.00102	0.978826	0.404271	0.478415	0.784789	1	0.465826	0.27179	0.598397	0.249612	0.629459	0.143248	0.196224	0.304196	0.104011	1	1	1	1	1	0.961843	1	0.788617	0.333028	0.988039	1	0.679357	0.333802	0.302434	1	1.00102	1	1	1	1	1	1	0.98183	1.00102	0.370206	0.197564	1.00102	1.00102	1	0.71933	0.321529	0.998471	0.893635
Node 57	0.761066	1.00102	0.978826	0.404271	1	0.0984803	0.123887	1	1	0.598397	0.00346021	1	0.143248	1	0.723617	1	1	0.136702	1	1	1	0.961843	1	0.386935	0.747952	0.891097	0.488939	0.934822	1	1	0.951223	1.00102	0.465826	1	1	0.118352	1	1	0.98183	1.00102	0.74125	1	1.00102	1.00102	1	0.71933	0.951039	0.936521	0.573877
Cluster_GTS1	0.226428	1.00434	0.91292	0.629638	0.937415	0.84169	0.430533	0.930725	0.740831	0.995317	0.398607	0.532425	0.962091	0.235124	0.0666098	0.0891443	0.582926	0.465158	1.00001	1	0.942618	0.831061	0.753867	0.946469	0.911661	0.134229	0.501277	0.154529	0.822579	0.968079	0.0420621	1.00434	0.225003	0.393805	1	0.0957162	1	0.310743	0.997421	1.00434	0.962143	0.496237	1.00434	1.00434	1	0.720581	0.36367	0.756392	0.454257
Cluster_SOK2	0.937313	1.00332	0.932735	0.81464	1	0.636485	1	1	1	0.757778	0.861447	0.136133	0.179103	0.26305	0.272063	0.291996	1	1	1.00001	1	0.127777	0.909164	0.657491	0.954234	0.988724	0.76486	0.324863	0.483964	0.123326	0.269212	0.369404	1.00332	1	1	1	0.336252	1	0.0082595	0.942081	1.00332	0.795841	0.954188	1.00332	1.00332	1	0.730365	0.0249082	0.807839	0.722705
Cluster_Autophagy	0.53927	1.00229	0.952959	1	0.769037	0.835645	1	0.756295	0.510364	0.623603	0.152335	1	0.484312	0.79484	0.468696	0.385995	0.370282	0.0393778	1	1	0.415913	0.451031	1	0.321524	0.51399	0.382822	0.779398	0.486549	0.59928	0.46588	0.573173	1.00229	1	1	1	1	1	1	0.959556	1.00229	0.813949	0.881554	1.00229	1.00229	1	0.749819	0.609408	0.862726	0.134652
Cluster_MAL13	0.670291	1.0046	0.90803	0.661292	0.120377	0.99902	0.449127	0.49649	0.760665	0.115965	0.452753	0.581685	0.0786121	0.825919	0.577915	0.761926	0.603886	1	1.00001	1	0.013612	0.809185	1	0.959814	0.433114	0.420363	0.541829	0.745331	0.0882398	0.0903123	0.508897	1.0046	0.49649	1	1	1	1	1	0.920661	1.0046	0.534259	0.545174	1.0046	1.0046	1	0.764355	0.530963	0.966329	0.716149
Cluster_SWI5	0.837692	1.0046	0.90803	0.661292	0.777009	0.957488	0.11442	0.759182	0.403647	0.399989	0.669793	0.791389	0.632664	0.994179	0.0919939	0.109321	1	1	1.00001	1	0.298514	0.809185	1	0.999096	0.815792	0.89697	0.541829	0.745331	0.839778	0.574093	0.688892	1.0046	0.107428	1	1	1	1	0.335652	0.920661	1.0046	0.847969	0.160339	1.0046	1.0046	1	0.764355	0.315872	0.744043	0.036035
Node 31	0.941223	1.0046	0.90803	0.903218	0.521226	0.340489	1	0.49649	1	0.882226	0.993391	0.791389	0.848982	0.487145	0.0919939	0.0366862	1	0.484533	1.00001	1	0.541829	0.809185	0.773394	0.736846	0.815792	0.420363	0.791318	0.574585	0.839778	0.975671	0.176854	1.0046	0.759182	1	1	1	0.397392	1	0.999937	1.0046	0.933561	0.986048	1.0046	1.0046	1	0.764355	0.530963	0.744043	0.536625
Cluster_RNAPol	0.262703	1.01005	0.810909	0.333964	0.542799	0.844605	1	0.686952	0.580242	0.0225196	0.631271	0.347362	0.699866	0.0793355	0.879435	0.512266	0.0430364	1	1.00005	1	0.95343	0.577531	0.00270478	0.00994279	0.740431	0.207079	0.873661	0.472502	0.741327	0.00350943	0.75759	1.01005	0.506813	0.312537	1	0.708791	1	0.739854	0.835615	1.01005	0.867246	0.936703	1.01005	1.01005	0.0992041	0.773552	0.637724	0.868457	0.957297
Cluster_GAL4	0.832995	1.00127	0.9736	1	1	0.510099	1	1	1	0.734075	0.751327	0.30348	1	0.342759	0.799652	1	1	1	1	1	0.567944	0.64268	1	0.192988	1	0.955996	0.567944	0.967088	1	1	0.0416643	1.00127	0.155617	1	1	1	1	1	0.977337	1.00127	0.569549	0.284977	1.00127	1.00127	1	0.79576	0.98515	0.921281	0.939286
Cluster_InvasiveGrowth	0.473348	1.00127	0.9736	0.476673	1	0.510099	1	1	1	0.394881	0.751327	1	0.211913	0.0985335	0.419476	0.157001	1	1	1	1	1	0.64268	1	1	0.821458	0.793749	1	0.489756	0.398169	0.417344	0.84774	1.00127	1	1	1	1	1	1	0.977337	1.00127	0.569549	1	1.00127	1.00127	1	0.79576	0.242066	0.921281	0.711032
Cluster_RLM1	1	1.00127	0.999999	1	0.556792	0.853462	1	1	1	0.124641	1	0.710953	1	0.687822	1	1	1	1	1	1	0.172921	0.64268	0.337452	0.516233	1	0.955996	1	0.967088	1	0.417344	0.0416643	1.00127	1	0.1367	1	1	1	1	0.977337	1.00127	0.855717	0.0664456	1.00127	1.00127	1	0.79576	0.98515	0.921281	0.711032
Cluster_sphingolipids	0.832995	1.00127	0.9736	0.476673	1	1	1	1	1	0.124641	0.352047	0.30348	0.61745	0.687822	0.799652	1	1	1	1	1	0.567944	0.93992	1	0.516233	1	0.793749	0.567944	0.805758	1	0.13007	0.555855	1.00127	0.155617	1	1	0.1457	1	0.289502	0.977337	1.00127	0.855717	1	1.00127	1.00127	1	0.79576	0.639379	0.921281	0.711032
Node 3	0.832995	1.00127	0.9736	0.476673	0.556792	1	0.152401	0.543379	0.0496048	0.734075	0.352047	1	1	0.687822	0.419476	0.545411	0.226478	1	1	1	0.0287364	0.994729	0.337452	0.516233	0.151676	0.133877	0.567944	0.489756	1	0.798244	0.84774	1.00127	1	1	1	1	1	1	0.977337	1.00127	1	0.0664456	1.00127	1.00127	1	0.79576	0.899872	0.921281	0.110863
Node 76	0.832995	1.00127	0.9736	1	1	0.510099	1	0.543379	0.327336	0.124641	1	1	0.61745	0.0121959	1	1	0.226478	1	1	1	1	0.93992	1	0.856713	0.453929	0.465515	1	0.967088	0.398169	0.13007	1	1.00127	1	1	1	1	1	1	0.977337	1.00127	0.569549	0.694097	1.00127	1.00127	1	0.79576	0.98515	0.921281	0.939286
Cluster_ARO80	0.85217	1.00255	0.947864	0.111444	0.456285	0.400973	1	0.0084527	1	0.247611	0.452833	0.382225	1	0.961942	0.807722	0.440297	1	0.307727	1	1	0.472083	0.795161	0.56127	0.88207	0.135528	0.106553	1	0.819331	0.638046	0.959392	0.452153	1.00255	0.437457	1	1	1	0.245041	1	0.955159	1.00255	0.47117	0.355021	1.00255	1.00255	1	0.802384	0.534872	0.989236	0.217992
Cluster_CAD1	0.151251	1.00255	0.947864	0.111444	0.456285	0.665942	0.0034072	0.791722	0.54776	0.478644	0.938288	0.382225	1	0.653687	0.110235	0.793573	1	1	1	1	0.813544	0.993002	1	0.673492	0.593997	0.791965	0.0110848	0.363419	1	0.544688	0.452153	1.00255	0.437457	1	1	1	1	0.137756	0.955159	1.00255	0.994368	0.355021	1.00255	1.00255	1	0.802384	0.534872	0.84867	0.687229
Cluster_FKH1	0.85217	1.00255	0.947864	0.72637	0.179886	0.878071	1	0.791722	1	0.478644	0.069774	0.382225	0.543516	0.855335	0.547608	1	0.401864	1	1	1	0.191234	0.795161	1	0.88207	0.837075	0.565747	0.191234	0.941598	0.638046	0.108777	0.694193	1.00255	0.791722	1	1	1	0.245041	1	0.955159	1.00255	0.47117	0.906582	1.00255	1.00255	1	0.802384	0.783326	0.84867	0.440331
Cluster_LEU3	0.85217	1.00255	0.998811	1	0.179886	0.665942	0.281729	0.166853	1	0.893309	0.739779	0.681082	0.853853	0.961942	0.28457	0.04538	0.401864	1	1	1	0.472083	0.412795	1	0.189893	0.593997	0.981262	0.813544	0.16275	1	0.959392	0.2249	1.00255	1	1	1	0.27032	1	1	0.955159	1.00255	0.710815	0.355021	1.00255	1.00255	1	0.802384	0.534872	0.84867	0.968685
Cluster_HAP5	0.132108	1.00383	0.922777	0.857054	0.39633	0.548382	0.0835735	0.161939	0.696114	0.95317	0.289808	0.426317	0.766369	0.0125947	0.207865	0.377409	1	1	1.00001	1	0.415187	0.872275	0.709638	0.0729298	0.454689	0.626128	0.415187	0.681536	0.170495	0.945504	0.0914124	1.00383	0.161939	0.356961	1	1	1	0.641819	0.933457	1.00383	0.615625	0.856884	1.00383	1.00383	0.187416	0.8188	0.85882	0.976161	0.843597
Cluster_INO4	0.965425	1.00383	0.922777	1	0.913233	0.169075	1	0.161939	0.696114	0.988014	0.744472	0.426317	0.502033	0.248434	0.625064	0.377409	0.537639	0.424214	1.00001	1	0.919628	0.63367	0.334627	0.763163	0.454689	0.803049	0.698514	0.482815	0.170495	0.991846	0.897835	1.00383	0.662617	1	4.05661e-05	1	0.0630785	0.260464	0.933457	1.00383	0.907822	1	1.00383	1.00383	1	0.8188	0.85882	0.781699	0.480716
Cluster_RGT1	0.0315655	1.00615	0.879206	0.331722	0.496077	0.685721	1	0.122946	0.85163	0.95869	0.360638	0.437295	0.110623	0.926778	0.0411698	0.00471359	0.339694	0.586982	1.00002	1	0.519945	0.385018	0.862065	0.113519	0.243393	0.60436	0.519945	0.252395	0.913149	0.828466	0.536841	1.00615	0.882755	0.507029	1	0.169342	0.491272	0.47722	0.994865	1.00615	0.717046	0.777087	1.00615	1.00615	1	0.823554	0.777879	0.94291	0.768746
Cluster_Arginine	0.689476	1.0028	0.942795	0.140027	0.508494	0.733627	1	0.000252797	0.202275	0.0555403	0.266942	0.7329	0.597807	0.737335	0.158092	0.208333	0.43187	0.332759	1	1	0.524863	0.377791	0.213816	0.260452	0.000444996	0.238872	0.524863	0.0299847	1	0.15615	0.789007	1.0028	1	0.00329259	1	0.292989	1	1	0.950781	1.0028	0.599933	0.709137	1.0028	1.0028	1	0.84489	0.464691	0.999981	0.980562
Cluster_CUP9	1	1.00153	0.999599	1	1	0.291088	1	1	1	0.828449	0.811788	0.124408	1	0.485804	0.523995	0.213603	1	0.197923	1	1	0.634752	0.588252	0.389856	0.625859	1	0.998696	1	0.646069	1	0.521675	0.710557	1.00153	1	1	1	1	1	0.336483	0.999707	1.00153	0.148083	0.371233	1.00153	1.00153	1	0.851391	0.83561	0.906286	1
Cluster_HSF1	0.552897	1.00409	0.917836	0.595727	0.926307	0.802316	0.411315	0.697858	1	0.043164	0.170722	0.263948	0.548268	0.713447	0.858409	0.920069	0.560863	0.445061	1.00001	1	0.932088	0.959537	1	0.92909	0.887771	0.744542	0.732736	0.887191	1	0.256874	0.994534	1.00409	0.00452323	1	1	0.0861459	1	1	0.929173	1.00409	0.169675	0.445176	1.00409	1.00409	1	0.852895	0.415941	0.973037	0.369467
Node 73	0.4112	1.10856	0.959708	0.0376203	0.304958	0.198591	0.0272347	0.486125	0.452996	0.994023	0.639561	0.980551	0.797774	0.868055	0.216734	0.382038	0.965143	0.868595	1.00497	1.00002	0.633295	0.0145763	3.64506e-17	1.40034e-16	0.0877527	0.232755	0.237474	0.237964	0.823363	0.998848	0.237493	1.10856	0.548109	0.849889	1.00002	0.351402	0.574606	0.386697	0.766548	1.10856	0.999792	0.82886	1.10856	1.10856	0.577983	0.855475	0.38553	0.861215	0.996564
Cluster_MitochondrialRPs	0.221986	1.01215	0.776582	0.936948	0.572204	0.311451	1	0.832557	1	0.42122	0.145736	0.329164	0.298901	0.378252	0.196024	0.836107	1	0.0876783	1.00007	1	0.60434	0.227163	0.312344	0.011933	0.958129	0.73131	0.0981857	0.789434	0.678338	0.538655	0.431519	1.01215	0.994512	0.397157	1	0.177278	0.734855	0.609236	0.805213	1.01215	0.104853	0.174155	1.01215	1.01215	0.479499	0.861969	0.497263	0.460757	0.995796
Cluster_adata-ARG3	0.986431	1.00306	0.937752	0.170735	1	0.327163	1	0.00384321	0.614226	0.454594	0.828253	0.510549	0.647093	0.804656	0.212665	0.249639	1	1	1	1	0.866817	0.345747	1	0.936915	0.104266	0.18528	0.57396	0.598085	1	0.425735	0.106036	1.00306	0.847894	0.297496	1	1	0.286374	1	0.946422	1.00306	0.870381	0.479831	1.00306	1.00306	0.152924	0.878915	0.658506	0.821229	0.831087
Cluster_DAL81	0.986431	1.00306	0.937752	1	0.557309	0.149503	0.327795	1	0.614226	0.953932	0.0475214	0.510549	0.647093	0.602691	0.212665	0.249639	1	0.0672905	1	1	0.57396	0.730274	1	0.573639	0.90516	0.399647	0.279381	0.0675634	0.704715	0.67973	0.69098	1.00306	0.0830948	1	1	1	1	0.56003	0.946422	1.00306	0.957002	0.479831	1.00306	1.00306	0.152924	0.878915	0.400086	0.821229	0.943293
Cluster_DIG1	0.916121	1.00306	0.937752	0.437816	0.858408	0.934209	1	0.0830948	0.614226	0.24548	0.96468	0.510549	0.14268	0.373762	0.883045	1	1	1	1	1	0.279381	0.345747	0.628017	0.936915	0.253549	0.827334	0.57396	0.979036	0.101834	0.425735	0.859026	1.00306	0.537244	1	1	1	1	1	0.946422	1.00306	0.115747	0.941902	1.00306	1.00306	1	0.878915	0.400086	0.821229	0.213429
Cluster_HMS1	0.278059	1.00306	0.937752	0.788936	0.858408	0.327163	1	0.847894	1	0.679546	0.328987	0.77737	0.647093	0.804656	0.883045	1	1	0.00795457	1	1	1	0.345747	1	0.99061	0.90516	0.638422	0.57396	0.372317	1	0.425735	0.952049	1.00306	0.847894	0.297496	1	1	0.286374	0.56003	0.998732	1.00306	0.115747	0.479831	1.00306	1.00306	1	0.878915	0.658506	0.821229	0.831087
Cluster_RTG1	0.509031	1.00563	0.888715	0.510396	0.66306	0.751022	0.517672	0.638421	0.825978	0.990368	0.997842	0.349881	0.336948	0.0722262	0.0536766	0.208238	0.677753	0.187199	1.00002	1	0.975306	0.716348	0.837228	0.134867	0.920594	0.925373	0.24465	0.0229782	0.89347	0.963418	0.69047	1.00563	0.638421	0.477011	1	0.500629	0.461712	1	0.995679	1.00563	0.38738	0.712402	1.00563	1.00563	1	0.887888	0.930901	0.951224	0.185513
Cluster_adata-EGT2	0.672356	1.00178	0.963227	0.596191	0.680027	0.395802	0.206694	0.666384	0.426077	0.891454	0.011233	0.824152	1	0.859781	0.61496	0.271642	1	0.226896	1	1	0.691244	0.887241	1	1	0.333294	0.267535	0.691244	0.217491	1	0.893716	0.955005	1.00178	1	1	1	1	1	1	0.968408	1.00178	0.830072	0.452939	1.00178	1.00178	1	0.891879	0.452577	0.891531	0.126583
Cluster_RTG3	0.354546	1.00178	0.963227	1	1	0.0372817	0.206694	1	1	0.983538	1	0.476872	1	0.31827	0.296583	0.271642	1	0.226896	1	1	1	0.53842	0.438127	0.402815	1	0.830522	0.295799	0.0588316	1	0.893716	0.565103	1.00178	0.269519	1	1	1	0.178553	1	0.999591	1.00178	0.581011	1	1.00178	1.00178	1	0.891879	0.932453	0.891531	0.876077
Cluster_STB1	0.918438	1.00178	0.963227	0.596191	1	0.709126	0.206694	0.666384	0.426077	0.37785	0.85756	0.476872	1	0.611455	0.894754	0.668461	0.302055	1	1	1	1	0.887241	0.438127	0.934186	0.652148	0.830522	1	0.764587	1	0.893716	0.994953	1.00178	0.269519	1	1	0.197898	0.178553	0.380368	0.968408	1.00178	0.291832	0.452939	1.00178	1.00178	1	0.891879	0.932453	0.891531	0.126583
Node 80	1	1.00178	0.963227	1	1	0.151468	0.206694	5.58514e-05	0.426077	0.983538	0.228698	1	1	0.611455	0.61496	0.668461	1	1	1	1	1	0.887241	0.438127	0.0388351	0.00318576	0.0598418	0.691244	0.488046	0.508887	0.893716	0.27819	1.00178	0.269519	1	1	1	0.178553	0.380368	0.968408	1.00178	0.995482	0.809624	1.00178	1.00178	1	0.891879	0.987895	0.891531	0.876077
Cluster_Peroxisome	0.799568	1.00332	0.932735	0.203125	0.879728	0.952062	0.349717	0.582357	0.643712	0.899386	0.861447	0.569216	0.691461	0.468658	0.498653	0.871523	1	1	1.00001	1	0.324863	0.697748	1	0.412257	0.319704	0.900219	0.324863	0.858213	0.733303	0.4953	0.90837	1.00332	0.582357	1	1	1	1	1	0.942081	1.00332	0.916969	0.537879	1.00332	1.00332	1	0.905924	0.3417	0.807839	0.962504
Cluster_MBP1	0.734462	1.00589	0.883948	1	0.8806	0.293674	1	0.66919	0.253639	0.290708	0.846201	0.111359	0.929754	0.665558	0.153561	0.869423	0.104809	1	1.00002	1	0.7129	0.408635	0.552763	0.304854	0.346632	0.317993	0.0525178	0.478825	0.665987	0.150869	0.999519	1.00589	0.233133	1	1	0.158277	0.132001	0.793192	0.8997	1.00589	0.0924073	0.55131	1.00589	1.00589	1	0.908104	0.667038	0.947126	0.556543
Cluster_tRNAprocessing	0.563438	1.00589	0.883948	0.788016	0.976539	0.164715	0.533441	0.867359	0.0061913	0.942709	0.846201	0.393646	0.59002	0.665558	0.153561	0.236528	0.693968	0.571434	1.00002	1	0.7129	0.692419	0.552763	0.304854	0.346632	0.0785734	0.484666	0.478825	0.90381	0.797219	0.760321	1.00589	0.66919	1	1	0.158277	0.476698	1	0.99528	1.00589	0.641449	0.891946	1.00589	1.00589	1	0.908104	0.910397	0.685212	0.840754
Cluster_primig-MidSpo	0.984925	1.00719	0.860476	0.871066	0.814351	0.71304	1	0.595129	0.360814	0.212799	0.221096	0.260063	0.362647	0.133038	0.823435	0.388109	0.763644	1	1.00002	1	0.439388	0.791944	0.661372	0.572792	0.750211	0.546244	0.944821	0.89836	0.282522	0.35144	0.897493	1.00719	0.0402984	0.00107514	1	0.587071	1	0.560909	0.879191	1.00719	0.583182	0.375196	1.00719	1.00719	0.0556169	0.913369	0.973656	0.630966	0.831207
Cluster_RPH1	0.746431	1.00204	0.95808	0.0624165	1	0.953773	0.232532	0.0968375	1	0.990851	0.303575	0.553221	0.785207	0.71445	0.384076	0.329499	1	1	1	1	0.739011	0.492798	1	0.503327	0.178465	0.746366	0.739011	0.351254	0.556374	1	0.976199	1.00204	1	1	1	0.222798	1	0.421362	0.963972	1.00204	0.198633	0.227219	1.00204	1.00204	1	0.921344	0.686365	0.877012	0.920786
Cluster_ASH1	0.720695	1.00486	0.903164	0.411002	0.559668	0.596822	0.46712	0.293075	0.430886	0.662683	0.875554	0.102253	0.869976	0.0463899	0.631397	0.538428	1	1	1.00001	1	0.157656	0.513587	0.449705	0.969985	0.689859	0.72862	0.816131	0.659065	0.560134	0.627634	0.255999	1.00486	0.293075	0.428555	1	0.450904	0.0144821	0.727794	0.916432	1.00486	0.629266	0.591522	1.00486	1.00486	0.231269	0.923761	0.834032	0.962756	0.430744
Cluster_MAL33	0.336856	1.00486	0.903164	0.690738	0.316199	0.774516	0.46712	0.53463	0.430886	0.0777828	0.15534	0.102253	0.430717	0.736435	0.927412	0.788219	1	0.50321	1.00001	1	0.336076	0.98189	1	0.905569	0.303752	0.359632	0.95904	0.989269	0.275712	0.0170314	0.0548351	1.00486	0.7856	1	1	0.115691	1	0.36029	0.916432	1.00486	0.277367	0.194993	1.00486	1.00486	1	0.923761	0.11654	0.731892	0.137308
Cluster_Biotin	0.960184	1.00229	0.999046	0.300091	1	0.586451	1	0.383336	0.510364	0.841389	0.68239	0.314906	0.484312	0.0307595	0.468696	0.385995	0.370282	1	1	1	0.779398	0.826933	1	0.840355	0.788459	0.382822	0.779398	0.486549	0.59928	0.46588	0.573173	1.00229	0.383336	1	1	1	1	0.459653	0.959556	1.00229	0.813949	0.596046	1.00229	1.00229	1	0.942785	0.609408	0.862726	0.818692
Cluster_RFX1	0.960184	1.00229	0.952959	1	1	0.314194	1	0.130181	0.510364	0.958328	0.379195	0.00501967	0.822819	0.94062	0.468696	0.385995	1	1	1	1	1	0.826933	0.523547	0.00660266	0.250596	0.959196	0.415913	0.243018	1	0.753573	0.801494	1.00229	0.756295	1	1	0.246931	1	1	0.959556	1.00229	0.813949	0.881554	1.00229	1.00229	1	0.942785	0.953649	0.862726	0.949955
Cluster_UGA3	0.132108	1.00383	0.922777	0.00592325	0.39633	0.335216	1	0.905101	0.696114	0.95317	0.744472	0.97598	0.10522	0.435586	0.397534	0.164213	1	0.424214	1.00001	1	0.698514	0.264983	0.0259422	0.175831	0.677687	0.992067	0.919628	0.140625	0.782461	0.822744	0.38981	1.00383	0.374066	0.356961	1	1	1	1	0.933457	1.00383	0.228793	0.392617	1.00383	1.00383	0.187416	0.943892	0.696946	0.781699	0.94097
Cluster_INO2	0.996775	1.00409	0.917836	0.595727	0.439289	0.0375507	1	0.415928	0.117242	0.906716	0.343939	0.263948	0.954023	0.861641	0.68006	0.700806	1	0.445061	1.00001	1	1	0.602461	1	0.230153	0.15509	0.744542	0.732736	0.581111	0.466304	0.95823	0.306009	1.00409	0.19266	1	4.63533e-05	0.396272	1	0.285648	0.997719	1.00409	0.940307	0.881114	1.00409	1.00409	1	0.956892	0.925338	0.768943	0.959492
Cluster_HIR1	0.619419	1.00255	0.947864	0.72637	1	0.400973	1	0.791722	0.54776	0.893309	0.452833	0.916602	0.247494	0.0661174	0.28457	0.793573	1	1	1	1	1	0.412795	0.56127	0.409278	0.968206	0.304426	0.191234	0.609679	0.638046	0.959392	0.2249	1.00255	0.437457	1	1	1	1	0.495419	0.955159	1.00255	0.882706	0.355021	1.00255	1.00255	1	0.958385	0.925711	0.84867	0.875034
Cluster_rRNAprocessing	0.157854	1.00693	0.991221	0.857316	0.793974	0.213708	0.591565	0.564908	0.883213	0.985428	0.922846	0.739449	0.875225	0.182409	0.473316	0.776197	0.751104	0.0714869	1.00002	1	0.618119	0.596921	2.66137e-08	1.38258e-06	0.711985	0.0287511	0.229137	0.970687	0.936079	0.961885	0.323545	1.00693	0.564908	1	1	0.573771	1	0.540903	0.883257	1.00693	0.502645	0.702188	1.00693	1.00693	1	0.960235	0.797812	0.641466	0.978826
Cluster_NuclearProteinTargetting	0.475975	1.00719	0.860476	0.678575	0.114818	0.0756735	0.230554	0.987769	0.641276	0.934543	0.365662	0.89311	0.890602	0.885421	0.0243718	0.388109	0.763644	0.0780332	1.00002	1	0.830164	0.917783	0.0197133	0.412503	0.942937	0.817092	0.0556078	0.265584	0.768348	0.916533	0.694689	1.00719	0.0402984	1	1	1	1	0.280825	0.993043	1.00719	0.833208	0.953712	1.00719	1.00719	1	0.968046	0.990157	0.630966	0.984932
Cluster_GCR1	0.21165	1.0028	0.942795	0.393303	1	0.253138	0.305141	0.822006	0.582309	0.585816	0.522542	1	0.597807	0.975799	0.619144	1	0.43187	1	1	1	1	0.94063	1	0.740681	0.664872	0.717135	0.234574	0.485201	1	0.847919	0.580415	1.0028	0.822006	1	1	0.0436309	1	0.0316045	0.950781	1.0028	0.928128	0.926327	1.0028	1.0028	1	0.969735	0.967828	0.834838	0.767812
Cluster_MATa1	0.432602	1.0028	0.942795	0.393303	0.833317	0.48545	1	0.822006	1	0.929403	0.103132	0.447902	0.879458	0.899585	0.619144	0.491845	0.43187	1	1	1	0.842412	0.377791	0.596015	0.260452	0.664872	0.717135	0.842412	0.485201	0.673071	0.970539	0.921041	1.0028	0.488878	1	1	1	1	0.0316045	0.950781	1.0028	0.981801	0.709137	1.0028	1.0028	1	0.969735	0.722019	0.986981	0.31328
Cluster_Pyrimidine	0.980572	1.0028	0.942795	0.393303	0.221342	0.733627	1	0.822006	0.582309	0.585816	0.522542	0.207086	0.299206	0.117934	0.849629	1	0.43187	1	1	1	0.524863	0.94063	0.0500318	0.260452	0.664872	0.479239	0.524863	0.879857	0.673071	0.353906	0.580415	1.0028	1	1	1	1	0.265996	1	0.950781	1.0028	0.981801	0.709137	1.0028	1.0028	1	0.969735	0.464691	0.834838	0.0450957
Cluster_SWI4	0.999594	1.00745	0.989911	1	0.652774	0.86525	1	0.624067	0.382195	0.0865195	0.946467	0.638595	0.396527	0.424265	0.998957	0.989824	1	0.281434	1.00003	1	0.0668473	0.907191	0.680373	0.978499	0.953946	0.493493	0.99243	0.999677	0.141606	0.142876	0.965642	1.00745	0.937745	0.574808	1	0.599958	0.190913	0.580287	0.875143	1.00745	0.367225	0.0280177	1.00745	1.00745	1	0.974406	0.401204	0.620636	0.634154
Cluster_CRZ1	0.749343	1.00306	0.937752	1	0.0921017	0.934209	1	0.0830948	0.614226	0.102809	0.328987	0.510549	0.351381	0.184747	0.978985	1	1	1	1	1	0.57396	0.985599	1	0.99061	0.480723	0.399647	0.866817	0.979036	0.704715	0.210248	0.859026	1.00306	0.847894	0.0453901	1	1	1	0.56003	0.946422	1.00306	0.273289	0.479831	1.00306	1.00306	1	0.977991	0.658506	0.821229	0.0851252
Cluster_GCR2	0.278059	1.00306	0.937752	0.437816	0.858408	0.149503	0.327795	0.847894	0.614226	0.679546	0.58706	0.510549	0.900582	0.984713	0.428933	0.849515	1	0.356893	1	1	1	0.92564	0.243995	0.155121	0.726255	0.638422	0.279381	0.598085	1	0.978629	0.859026	1.00306	0.847894	1	1	0.31496	1	0.185588	0.946422	1.00306	0.870381	0.754998	1.00306	1.00306	1	0.977991	0.849044	0.821229	0.413132
Cluster_SUM1	0.581928	1.00332	0.932735	1	0.879728	0.636485	1	1	1	0.970296	0.861447	0.960473	0.179103	0.26305	0.272063	0.291996	0.487462	1	1.00001	1	1	0.697748	1	0.841661	1	0.559398	0.61925	0.276619	1	0.984498	0.0190286	1.00332	0.289119	1	1	1	0.306192	0.210296	0.942081	1.00332	0.99465	0.286339	1.00332	1.00332	1	0.983996	0.594708	0.807839	0.722705
Cluster_SRD1	0.229478	1.00512	0.898323	0.218418	0.170043	0.0697177	0.484529	0.809435	1	0.857903	0.556049	0.128869	0.70545	0.45705	0.0701632	0.0594693	1	0.521215	1.00001	1	0.838271	0.48581	0.476739	0.160644	0.958195	0.0626105	0.616867	0.235669	0.869346	0.985968	0.344466	1.00512	0.153	0.445182	1	0.468002	0.43045	0.745858	0.996427	1.00512	0.843467	0.944739	1.00512	1.00512	1	0.985379	0.427149	0.719936	0.509163
Node 68	0.394675	1.00512	0.898323	0.085573	0.961674	0.464542	1	0.809435	0.457451	0.938351	0.556049	0.264274	0.70545	0.961569	0.156805	0.0594693	0.642714	1	1.00001	1	1	0.48581	0.807937	0.476373	0.958195	0.304495	0.616867	0.568936	0.869346	0.839883	0.197021	1.00512	0.809435	1	1	1	0.104481	0.384583	0.912222	1.00512	0.843467	0.417783	1.00512	1.00512	1	0.985379	0.629894	0.719936	0.683274
Cluster_Proteasome	0.00944769	1.00667	0.869793	0.389902	0.919224	0.298262	1	0.749827	0.0433496	0.885961	0.283969	0.85529	0.486188	0.81783	0.149813	0.167567	0.138287	1	1.00002	1	0.789246	0.0997186	0.883122	0.633868	0.500777	0.788309	0.373846	0.149211	0.465586	0.756929	0.0696732	1.00667	0.749827	1	1	0.560048	0.160947	0.831738	0.887341	1.00667	0.834909	0.477668	1.00667	1.00667	0.30249	0.985653	0.916018	0.652137	0.440798
Cluster_RAP1	0.220995	1.00357	0.927743	0.0797587	0.146456	0.700148	1	0.624143	0.670951	0.242318	0.69814	0.969186	0.453483	0.757293	0.160015	0.334769	0.513193	1	1.00001	1	0.370326	0.289562	0.684637	0.708596	0.197759	0.696897	0.370326	0.379129	1	0.157827	0.689361	1.00357	0.888936	1	1	0.356889	0.325465	1	0.93776	1.00357	0.708998	0.339352	1.00357	1.00357	1	0.988364	0.53223	0.794663	0.00730485
Cluster_RPs	0.777103	1.02149	0.642013	5.06144e-07	0.0985615	0.807316	0.502405	0.924489	0.602953	0.176402	0.636183	0.746854	0.872082	0.845597	0.496356	0.543075	1	0.952368	1.00022	1	0.120071	0.451673	0.963288	0.752571	0.0332034	0.539163	0.628758	0.67631	0.162962	0.155524	0.811352	1.02149	0.96417	0.693561	1	0.729071	0.669508	0.801104	0.684071	1.02149	0.845807	0.0278075	1.02149	1.02149	0.31074	0.995106	0.107316	0.989892	0.46723
Cluster_FHL1	0.558244	1.01294	0.764069	0.000164423	0.118977	0.215037	0.220938	0.996395	0.536128	0.574458	0.807907	0.945072	0.995689	0.63559	0.396059	0.447754	1	0.544047	1.00008	1	0.0738758	0.75514	0.914973	0.680926	0.377762	0.059952	0.516865	0.636199	0.961218	0.389754	0.922648	1.01294	0.945515	1	1	0.462525	0.405403	0.422687	0.794084	1.01294	0.429022	0.087206	1.01294	1.01294	1	0.999856	0.174634	0.953261	0.18891
Cluster_Proline	0.216865	1.00076	0.984079	0.321875	1	1	1	0.37513	1	0.827747	0.566006	1	1	0.799423	1	1	1	1	1	1	1	0.767057	1	0.688197	0.644221	0.963803	1	0.870956	1	1	0.148646	1.00076	0.37513	1	1	1	1	1	0.986343	1.00076	0.555728	0.114522	1.00076	1.00076	1	1	0.847308	0.952008	0.813695
Node 40	0.658194	1.00076	0.984079	0.321875	1	0.683972	1	0.37513	1	0.827747	0.566006	0.525021	0.438069	0.799423	0.618762	1	1	1	1	1	0.00366775	0.767057	1	0.688197	0.644221	0.743953	0.395516	0.491807	1	1	1	1.00076	1	1	1	0.0901353	0.0807998	1	0.986343	1.00076	0.154935	1	1.00076	1.00076	1	1	0.427041	0.952008	0.393826
Node 55	0.658194	1.00076	0.984079	1	1	0.240001	1	1	0.211673	0.827747	1	1	1	0.799423	0.618762	1	1	1	1	1	0.395516	0.767057	1	0.243983	0.205112	0.963803	0.395516	0.491807	1	1	0.148646	1.00076	1	1	1	1	1	1	0.999941	1.00076	1	0.508596	1.00076	1.00076	1	1	0.847308	0.952008	0.813695
Node 56	0.658194	1.00076	0.984079	1	1	0.240001	1	1	0.211673	0.827747	1	1	1	0.799423	0.618762	1	1	1	1	1	0.395516	0.767057	1	0.243983	0.205112	0.963803	0.395516	0.491807	1	1	0.148646	1.00076	1	1	1	1	1	1	0.999941	1.00076	1	0.508596	1.00076	1.00076	1	1	0.847308	0.952008	0.813695
Node 84	0.658194	1.00076	0.984079	0.321875	0.386205	1	1	1	1	0.0871407	0.148183	0.525021	1	0.799423	1	1	1	1	1	1	0.395516	0.767057	1	1	0.205112	0.963803	1	0.870956	1	0.617156	0.896164	1.00076	0.37513	1	1	1	1	1	0.986343	1.00076	0.555728	0.508596	1.00076	1.00076	1	1	0.847308	0.952008	0.0787372
Cluster_Glycogen	0.761066	1.00102	0.978826	0.404271	0.478415	0.784789	1	0.465826	0.27179	0.598397	1	0.629459	1	0.549797	0.723617	1	1	1	1	1	1	0.961843	1	0.788617	0.333028	0.891097	0.488939	0.679357	1	0.722064	0.730986	1.00102	0.465826	1	1	1	1	1	0.98183	1.00102	0.370206	0.197564	1.00102	1.00102	1	1	0.321529	0.936521	0.213775
Node 1	0.349578	1.00102	0.978826	1	1	1	1	0.0108329	1	1	0.671471	0.0353563	1	1	0.723617	0.467729	0.18569	1	1	1	0.488939	0.702128	1	1	0.077197	0.200204	0.488939	0.934822	1	1	0.358466	1.00102	0.103039	1	1	1	0.106268	0.239208	0.98183	1.00102	0.954211	0.612273	1.00102	1.00102	1	1	0.743576	0.936521	0.213775
Node 71	0.349578	1.00102	0.978826	1	1	0.0984803	1	1	1	0.904197	0.671471	0.629459	0.536343	0.882631	0.0658192	0.467729	0.18569	1	1	1	1	0.702128	1	0.788617	1	0.596809	0.115247	0.304256	1	1	0.358466	1.00102	1	1	1	1	1	0.239208	0.98183	1.00102	0.74125	0.197564	1.00102	1.00102	1	1	1	0.936521	0.893635
Cluster_adata-aAlpha	1	1.00051	0.989359	1	0.277727	0.535982	1	1	1	0.690354	1	0.391192	1	0.657285	1	1	1	1	1	1	0.285048	0.83797	1	0.540125	1	0.89052	1	1	1	0.472702	0.779018	1.00051	1	1	1	1	1	1	0.990876	1.00051	1	0.377238	1.00051	1.00051	1	1	0.939093	0.967748	1
Cluster_Leucine	0.511084	1.00051	0.989359	0.228111	1	0.535982	1	1	0.146612	1	1	1	0.319003	0.657285	1	1	1	1	1	1	1	0.992866	1	0.540125	0.497851	0.89052	1	0.744573	1	1	1	1.00051	0.0210034	1	1	1	1	1	0.990876	1.00051	0.78589	1	1.00051	1.00051	1	1	0.56713	0.967748	1
Node 18	0.511084	1.00051	0.989359	1	1	0.10156	1	1	1	0.690354	1	0.0482291	1	1	1	1	1	1	1	1	1	0.83797	1	0.103512	1	0.447555	1	0.244505	1	1	0.779018	1.00051	0.269065	1	1	1	1	1	0.990876	1.00051	1	1	1.00051	1.00051	1	1	0.939093	0.967748	0.673739
Node 21	0.511084	1.00051	0.989359	0.228111	0.277727	0.535982	1	1	0.146612	1	1	0.391192	1	0.657285	0.0754801	1	1	1	1	1	1	0.83797	1	1	0.497851	0.89052	0.0238162	0.244505	1	1	0.280672	1.00051	1	1	1	1	1	0.127735	0.990876	1.00051	0.78589	0.377238	1.00051	1.00051	1	1	0.56713	0.967748	0.673739
Node 34	1	1.00051	0.989359	1	1	0.535982	1	0.269065	1	1	0.426732	1	1	1	0.474177	1	1	1	1	1	0.285048	0.83797	1	0.540125	0.0848257	0.447555	0.285048	0.744573	1	1	0.280672	1.00051	0.269065	1	1	1	1	1	0.990876	1.00051	1	1	1.00051	1.00051	1	1	0.56713	0.967748	0.673739
Node 49	1	1.00051	0.989359	1	1	1	0.0639751	1	0.146612	0.690354	1	0.391192	0.319003	0.657285	1	1	1	1	1	1	1	0.83797	1	0.540125	0.497851	0.447555	1	0.244505	1	1	0.779018	1.00051	0.0210034	1	1	1	1	0.127735	0.990876	1.00051	1	0.377238	1.00051	1.00051	1	1	0.939093	0.967748	0.673739
Node 5	1	1.00051	0.989359	1	1	0.535982	1	1	1	0.690354	1	1	0.319003	0.171772	0.0754801	1	1	1	1	1	1	0.83797	1	1	0.497851	0.447555	0.0238162	0.244505	0.183746	0.472702	0.779018	1.00051	0.269065	1	1	1	1	1	0.990876	1.00051	0.288533	0.377238	1.00051	1.00051	1	1	0.56713	0.967748	0.673739
Node 77	0.0903891	1.00051	0.989359	1	0.277727	0.535982	1	0.269065	1	0.690354	1	0.391192	0.319003	0.171772	1	1	1	1	1	1	1	0.83797	1	1	0.0848257	0.447555	1	0.744573	1	0.472702	1	1.00051	1	1	1	1	1	1	0.990876	1.00051	0.78589	0.377238	1.00051	1.00051	1	1	0.939093	0.967748	0.183767
Node 83	0.511084	1.00051	0.989359	1	1	1	1	0.269065	1	0.690354	0.426732	1	1	0.171772	1	1	1	1	1	1	1	0.83797	0.151767	0.540125	0.0848257	0.89052	1	1	1	1	0.779018	1.00051	0.269065	1	1	1	1	1	0.990876	1.00051	0.78589	0.044403	1.00051	1.00051	1	1	0.939093	0.967748	0.673739
Cluster_RGM1	0.918438	1.00178	0.963227	1	0.680027	0.709126	1	0.666384	1	0.144373	0.85756	0.476872	0.739625	0.611455	0.894754	0.668461	1	1	1	1	0.295799	0.887241	1	0.934186	0.910439	0.576112	1	0.488046	0.141002	0.893716	0.955005	1.00178	0.666384	1	1	1	1	1	0.968408	1.00178	0.958645	0.0397899	1.00178	1.00178	1	1	0.932453	0.891531	0.641178
Cluster_GAT3	0.832995	1.00127	0.9736	0.476673	1	0.853462	1	1	0.327336	0.734075	0.352047	1	1	1	1	1	1	1	1	1	1	0.64268	0.337452	0.192988	0.821458	0.955996	1	0.805758	1	1	0.84774	1.00127	0.543379	1	1	1	1	1	0.977337	1.00127	0.978834	1	1.00127	1.00127	1	1	0.98515	0.921281	1
Node 6	1	1.00127	0.9736	1	1	0.853462	1	0.543379	0.0496048	0.946727	0.751327	1	0.61745	0.687822	0.419476	1	0.0225379	1	1	1	1	0.64268	1	0.856713	0.151676	0.465515	0.172921	0.18059	0.0763348	0.798244	0.555855	1.00127	0.543379	1	1	1	1	0.289502	0.977337	1.00127	0.569549	0.694097	1.00127	1.00127	1	1	0.242066	0.921281	0.939286
Node 63	0.832995	1.00127	0.9736	0.476673	1	0.853462	1	1	1	0.124641	0.0959604	0.710953	0.0402523	0.931333	1	1	1	1	1	1	1	0.999765	1	1	1	0.465515	1	0.967088	1	0.798244	0.977093	1.00127	1	1	1	0.1457	1	1	0.977337	1.00127	0.23731	1	1.00127	1.00127	1	1	0.242066	0.921281	0.0144399
Cluster_HIR2	0.450132	1.00204	0.95808	1	1	1	1	0.714856	0.1194	0.932341	0.89221	0.553221	0.150178	0.196743	0.691921	0.716884	0.337041	1	1	1	1	0.857773	1	1	0.727466	0.914678	0.356877	0.624839	0.00436361	0.689641	0.976199	1.00204	1	1	1	0.222798	1	0.421362	0.963972	1.00204	0.714857	1	1.00204	1.00204	1	1	0.890666	0.877012	0.221101
Cluster_Histidine	1	1.00204	0.95808	1	0.728145	0.780269	0.232532	0.00241653	0.1194	0.768794	0.89221	0.553221	0.785207	0.71445	0.691921	0.329499	1	1	1	1	0.739011	0.857773	0.126882	0.0162676	0.0513122	0.47396	1	0.848435	0.556374	0.92287	0.186991	1.00204	0.714856	1	1	1	0.201336	0.421362	0.963972	1.00204	0.8992	0.528179	1.00204	1.00204	1	1	0.890666	0.877012	0.988721
Cluster_MSS11	0.278059	1.00306	0.998268	0.788936	1	0.564593	1	1	0.614226	0.454594	0.328987	0.949299	0.351381	0.931227	0.0239247	0.0844138	1	1	1	1	0.866817	0.92564	0.628017	0.796362	0.90516	0.399647	0.0266847	0.372317	1	0.881557	0.69098	1.00306	0.847894	0.297496	1	1	1	0.0401305	0.946422	1.00306	0.957002	0.941902	1.00306	1.00306	0.0111615	1	0.849044	0.821229	0.943293
Node 86	0.937313	1.00332	0.932735	0.480488	1	0.636485	0.349717	0.582357	1	0.757778	0.861447	0.314994	0.179103	0.0405736	0.909468	0.585429	1	1	1.00001	1	0.887448	0.697748	0.274325	0.645364	0.778445	0.900219	1	0.858213	0.361657	0.984498	0.993779	1.00332	0.582357	1	1	1	1	0.589175	0.942081	1.00332	0.608088	0.537879	1.00332	1.00332	1	1	0.977485	0.807839	0.722705
Cluster_HAL9	1	1.0028	0.942795	0.759676	1	0.253138	0.305141	0.822006	0.202275	0.585816	0.788054	0.0716314	1	0.507304	0.619144	0.491845	1	0.332759	1	1	0.842412	0.377791	1	0.260452	0.875343	0.963042	0.524863	0.106072	0.287798	1	0.921041	1.0028	0.488878	1	1	0.292989	0.265996	1	0.99894	1.0028	0.168261	0.709137	1.0028	1.0028	1	1	0.967828	0.834838	0.767812
Node 19	0.300737	1.00025	0.994666	1	1	0.318771	1	0.145034	1	1	1	1	1	0.414529	0.274829	0.145796	1	1	1	1	1	0.915418	1	1	0.291339	0.669037	0.154432	0.494539	1	1	0.529845	1.00025	1	1	1	1	1	1	0.995428	1.00025	1	0.21082	1.00025	1.00025	1	1	1	0.983744	0.428753
Node 20	0.300737	1.00025	0.994666	0.121412	1	0.318771	1	1	1	1	1	0.21971	1	1	0.274829	1	1	1	1	1	1	0.915418	1	1	1	0.669037	0.154432	0.494539	1	1	0.529845	1.00025	1	1	1	1	1	0.0660401	0.995428	1.00025	0.537211	1	1.00025	1.00025	1	1	0.753112	0.983744	1
Node 33	1	1.00025	0.994666	1	1	1	1	1	1	1	0.242824	0.21971	1	0.414529	1	1	1	1	1	1	1	0.915418	1	1	1	1	1	0.494539	1	1	1	1.00025	1	1	1	1	1	1	0.995428	1.00025	0.537211	0.21082	1.00025	1.00025	1	1	0.753112	0.983744	0.428753
Node 47	1	1.00025	0.994666	1	1	1	1	1	1	0.443485	1	1	1	0.414529	1	1	1	1	1	1	1	0.915418	1	1	1	0.669037	1	1	1	0.273813	1	1.00025	1	1	1	1	1	1	0.995428	1.00025	1	0.21082	1.00025	1.00025	1	1	0.753112	0.983744	1
Node 51	1	1.00025	0.994666	1	1	1	1	1	1	0.443485	1	1	1	1	1	1	0.0500381	1	1	1	0.154432	0.915418	1	1	1	0.669037	1	0.494539	1	0.273813	1	1.00025	1	1	1	1	1	1	0.995428	1.00025	1	1	1.00025	1.00025	1	1	0.753112	0.983744	1
Node 66	1	1.00025	0.994666	1	0.150114	1	1	1	1	1	1	1	0.174752	0.414529	1	1	1	1	1	1	1	0.915418	1	1	1	1	1	1	0.0965202	1	0.529845	1.00025	1	1	1	1	1	1	0.995428	1.00025	0.537211	0.21082	1.00025	1.00025	1	1	0.753112	0.983744	1
Node 70	1	1.00025	0.994666	1	1	1	1	1	1	0.443485	0.242824	1	1	1	0.274829	1	1	1	1	1	1	0.915418	1	1	1	0.669037	0.154432	0.494539	0.0965202	1	0.529845	1.00025	1	1	1	1	1	1	0.995428	1.00025	0.537211	0.21082	1.00025	1.00025	1	1	0.753112	0.983744	0.428753
Node 75	1	1.00025	0.994666	1	1	1	1	1	1	0.443485	1	0.21971	1	0.414529	1	1	1	1	1	1	1	0.915418	1	1	1	0.669037	1	0.494539	0.0965202	1	1	1.00025	1	1	1	1	1	1	0.995428	1.00025	0.537211	1	1.00025	1.00025	1	1	0.753112	0.983744	1
Node 85	1	1.00025	0.994666	1	1	1	0.0325121	0.145034	1	1	0.242824	1	1	1	0.274829	0.145796	1	1	1	1	1	0.915418	1	1	0.291339	0.669037	1	0.494539	1	1	0.529845	1.00025	1	1	1	1	1	1	0.995428	1.00025	1	1	1.00025	1.00025	1	1	0.753112	0.983744	1
Node 88	1	1.00025	0.994666	1	1	0.318771	1	0.145034	1	1	0.242824	1	1	0.414529	0.274829	1	1	1	1	1	1	0.915418	1	0.321819	0.291339	0.669037	0.154432	0.494539	1	1	0.529845	1.00025	1	1	1	1	1	1	0.995428	1.00025	0.537211	1	1.00025	1.00025	1	1	0.753112	0.983744	1
Cluster_ABF1
Cluster_DrugResistance
Cluster_Glutamate
Cluster_Mating
Node 23
Node 24
Node 25
Node 27
Node 28
Node 29
Node 36
Node 39
Node 4
Node 41
Node 45
Node 48
Node 50
Node 52
Node 58
Node 64
Node 78
Node 79
[truncated: 42 more columns]
