# Supplementary material for: Conservation and Evolution of Cis-Regulatory Systems in Ascomycete Fungi
Source: PLoS Biol. 2004 Nov 9;2(12):e398. doi: 10.1371/journal.pbio.0020398 (PMC526180; doi:10.1371/journal.pbio.0020398)
Supplement: Dataset S30 — (404 KB XLS). [file pbio.0020398.sd030.xls]

## Sheet: Ca_newYCHG_1000bp-probs
UID	ABF1	ACE2	ADR1	AFT1	ARO80	ASH1	AZF1	BAS1	YAP1	CAT8	CBF1	CHA4	CRZ1	CUP2	DAL80	GATA	ECM22	FKH1	FLO8	FZF1	GAL4	GAT1	GATGAG1	GATGAG2	GCN4	GCR1	GLN3	GZF3	HAC1	HAP1	HAP4	HCM1	HSF1	IME1	INO2/4	LEU3	LYS14	MAC1	MAL63	MATALPHA	MCB	MCM1	MCM1-2	MCM1-3	MET30/31	MIG1	MOT3	MSN2/4	MTsite1
Cluster_ABF1
Cluster_ACE2	0.825206	1.00121	0.55567	1	1	0.759486	0.472599	0.302946	0.0412991	0.675874	1	1	1	0.0346234	0.20525	0.308122	0.619022	0.396053	1	1	1	0.690785	0.143819	0.0349935	0.526514	0.333833	0.204864	0.741922	1	0.25487	0.350578	1	0.691294	1	1	1	1	1	0.193839	1	0.535724	0.0832789	1.00121	1.00121	0.422778	0.471147	0.64248	0.106986	0.687091
Cluster_adata-aAlpha	1	1.00033	0.851993	1	1	0.765116	0.867294	1	0.709455	1	1	1	1	0.0693214	0.42856	0.713755	0.0199359	0.0239378	1	1	1	0.904074	1	1	1	0.355012	0.721696	0.754725	1	1	0.751463	1	0.65928	1	1	1	1	1	0.842084	1	1	0.541267	1.00033	1.00033	1	0.295616	0.886383	0.871353	0.0269468
Cluster_adata-ARG3	1	1.00143	0.499328	0.704341	1	0.313229	0.0393863	0.000154098	0.461312	1	0.636033	0.644893	1	0.67657	0.344548	0.471486	0.299061	0.924809	1	1	0.208767	0.64582	1	0.429748	0.053271	0.220527	0.508211	0.295197	1	1	0.66655	1	0.58423	1	1	1	1	0.0638875	0.5792	1	0.630138	0.155606	1.00143	1.00143	0.129602	0.965152	0.592789	0.697245	0.579121
Cluster_adata-CalciumSpecific	0.854051	1.00242	0.308544	0.872956	1	0.711397	0.834446	0.508951	0.911004	0.645698	0.497509	0.510213	1	0.260989	0.534182	0.182737	0.855032	0.999442	1	1	1	0.476967	1	0.96058	0.978988	0.527813	0.799036	0.126708	1	1	0.393231	1	0.980153	1	1	1	0.496176	0.484619	0.317428	1	0.463791	0.996725	1.00242	1.00242	0.667041	0.53815	0.412556	0.246676	0.835465
Cluster_adata-Chaperones	1	1.00121	0.891242	0.257614	1	0.759486	0.0048356	0.124163	0.928986	1	0.196406	1	1	0.895022	0.467474	0.931924	1	0.976322	1	1	1	0.690785	1	0.753218	0.296819	0.333833	0.204864	0.356193	0.160407	1	0.736354	1	0.0221735	1	1	1	0.290046	0.0410727	0.450462	1	0.848138	0.755344	1.00121	1.00121	1	0.232938	0.932685	0.263408	0.430084
Cluster_adata-EGT2	0.670325	1.00077	0.688093	0.0189488	1	0.535346	0.0560527	0.873775	0.0477313	0.511677	0.419597	1	1	0.311022	0.138402	0.446844	1	0.326468	1	1	1	0.79029	1	0.725754	0.789283	0.346766	0.238006	0.51853	1	1	0.872593	1	0.918971	1	1	1	1	0.411861	0.753334	1	0.304093	0.50071	1.00077	1.00077	1	0.826058	0.754669	0.0592955	0.67042
Cluster_adata-ENA1	0.273759	1.00077	0.688093	1	1	0.535346	0.756582	0.569667	0.944133	1	1	0.427245	1	0.311022	0.454818	0.446844	0.458796	1	1	1	1	0.79029	1	0.415817	0.789283	0.346766	0.538043	0.51853	1	1	0.513315	1	0.673888	1	1	1	1	1	0.441135	1	0.0830814	0.837779	1.00077	1.00077	1	0.826058	0.754669	0.21856	0.917628
Cluster_adata-ERD2	0.0994092	1.00088	0.652294	1	1	0.855498	0.341302	0.33614	0.542374	1	1	1	1	0.190833	0.688439	0.81718	0.504262	0.720938	1	1	0.134165	0.764149	1	1	0.0395925	0.271551	0.433769	0.472073	1	1	0.839971	1	0.943422	1	1	1	1	1	0.884186	1	1	0.26934	1.00088	1.00088	0.329405	0.467011	0.724912	0.352617	0.193796
Cluster_adata-G1DNAreplication	0.252291	1.00132	0.526747	0.675266	1	0.342506	0.174709	0.852428	0.992895	1	0.0550315	1	0.355298	0.363843	0.661082	0.993307	0.651041	0.00122422	1	1	1	0.667925	1	0.8076	0.824694	0.272575	0.590684	0.70739	1	1	0.318694	1	0.916802	1	1	1	1	0.597552	0.385899	1	0.0289044	0.00854217	1.00132	1.00132	1	0.180046	0.617136	0.796755	0.275925
Cluster_adata-OAC1	0.105023	1.00044	0.807686	1	1	0.699778	0.932325	0.0541159	0.807586	1	0.0302458	1	1	0.191882	0.323085	0.0134917	1	0.327675	1	1	1	0.874182	1	0.795481	0.327296	0.251354	0.181218	0.687135	1	1	0.683178	1	0.762048	1	1	1	1	1	0.313805	1	1	0.226372	1.00044	1.00044	1	0.196905	0.851448	0.680199	1
Cluster_adata-Respiration	0.645491	1.00242	0.308544	0.597804	1	0.428467	0.00159607	0.699085	0.806	0.0561447	0.000797591	0.022803	0.553012	0.940989	0.534182	0.91599	0.107466	0.642949	1	1	0.327312	0.476967	1	0.894042	0.452397	0.0789313	0.310585	0.401501	1	1	0.122742	1	0.692322	1	1	1	0.496176	0.0719587	0.317428	1	0.882207	0.221756	1.00242	1.00242	1	0.53815	0.412556	0.723276	0.932015
Cluster_adata-RET3	0.676082	1.00253	0.662278	0.144458	1	0.403821	0.46085	0.998894	0.536974	0.905325	0.832901	0.840034	0.569096	0.652056	0.146163	0.0563701	0.303506	0.932271	1	1	1	0.461164	1	0.915854	0.911436	0.473923	0.596098	0.115337	1	1	0.368631	1	0.233901	1	0.0395562	1	0.511653	0.825463	0.133152	1	0.500342	0.631825	1.00253	1.00253	1	0.951659	0.396262	0.481144	0.997044
Cluster_adata-Secretion	0.950908	1.00209	0.740504	0.831626	1	0.508786	0.643618	0.558315	0.927032	0.564372	0.771831	1	1	0.21342	0.836	0.930996	1	0.480833	1	1	1	0.527688	1	0.434998	0.929094	0.928169	0.490392	0.916231	1	1	0.754241	1	0.532049	0.0368096	1	1	1	0.157352	0.257983	1	0.593992	0.992848	1.00209	1.00209	0.235985	0.350032	0.829116	0.965215	0.866851
Cluster_adata-TRP4	0.210694	1.00121	0.55567	0.257614	0.0900439	0.374516	0.251917	3.02575e-07	0.299757	1	0.196406	0.583535	1	0.728938	0.467474	0.781961	0.619022	0.396053	1	1	1	0.690785	1	0.51061	0.000600949	0.333833	0.432465	0.356193	1	1	0.350578	1	0.0798347	1	1	1	1	1	0.450462	1	0.535724	0.477346	1.00121	1.00121	1	0.232938	0.64248	0.00533416	0.886995
Cluster_adata-TUB	0.795154	1.0011	0.586176	0.60827	1	0.409513	0.00905408	0.769121	0.983787	0.640897	0.168629	0.548995	1	0.644659	0.785167	0.461463	0.584068	0.130776	1	1	1	0.714424	1	0.889023	0.401226	0.162203	0.908121	0.946769	1	1	0.771391	1	0.972419	1	1	1	1	0.531587	0.521034	1	0.199234	0.409876	1.0011	1.0011	1	0.786011	0.668863	0.000881062	0.0471681
Cluster_ADR1	0.166672	1.00165	0.818357	0.754922	1	0.629326	0.830014	0.77966	0.925712	0.436549	0.310354	0.320367	0.422358	0.239362	0.475567	0.221574	0.731855	0.0115178	1	1	0.236787	0.603772	1	0.913708	0.722931	0.320868	0.959822	0.854928	0.212166	0.330529	0.239392	1	0.965755	1	1	1	1	0.300329	0.231823	1	0.427949	0.0362771	1.00165	1.00165	1	0.20792	0.883964	0.683005	0.277895
Cluster_ARG80	0.0310875	1.00143	0.499328	1	1	0.906982	0.68365	0.685054	0.689477	1	0.636033	0.644893	1	0.254286	0.597571	0.260312	0.0190609	0.988018	1	1	1	0.64582	1	0.0951112	0.528723	0.0112145	0.508211	0.673087	1	1	0.289706	1	0.801012	1	1	1	1	1	0.327909	1	0.892228	0.599821	1.00143	1.00143	0.0227783	0.75765	0.592789	0.485711	0.345259
Cluster_ARG81	0.110262	1.00143	0.499328	0.704341	1	0.693833	0.00923418	0.0274159	0.0372962	0.73595	0.0676925	0.644893	1	0.112464	0.597571	0.873566	0.0190609	0.770994	1	1	1	0.64582	0.16767	0.0310595	0.149244	0.44607	0.722641	0.896055	1	1	0.289706	1	0.937855	1	1	1	1	0.626969	0.327909	1	0.630138	0.599821	1.00143	1.00143	0.129602	0.991127	0.592789	0.278263	0.79745
Cluster_Arginine	0.252291	1.00132	0.526747	1	1	0.342506	0.0161924	0.0161789	0.186311	1	0.224681	0.615434	1	0.927629	0.402938	0.628498	0.0141164	0.901146	1	1	1	0.667925	0.155828	0.166019	0.082801	0.272575	0.353356	0.70739	1	1	0.70131	1	0.750985	1	1	1	1	0.597552	0.385899	1	0.872067	0.116806	1.00132	1.00132	0.0181662	0.391613	0.617136	0.599614	0.747067
Cluster_ARO80	0.795154	1.0011	0.586176	1	1	0.409513	0.155636	0.0850724	0.710969	0.253419	0.540365	0.174985	1	0.849727	0.537503	0.71845	1	0.319348	1	1	1	0.714424	1	0.687052	0.188283	0.162203	0.520636	0.391259	1	0.234662	0.385649	1	0.354411	1	1	1	1	1	0.240498	1	0.482652	0.925634	1.0011	1.0011	0.393192	0.103367	0.668863	0.611067	0.616998
Cluster_ASH1	1	1.00121	0.55567	1	1	0.374516	0.000387459	0.814934	0.539778	1	0.196406	1	1	0.974332	0.20525	0.549087	1	0.396053	1	1	1	0.690785	1	0.753218	0.971822	0.593366	0.204864	0.356193	1	1	0.736354	0.0766892	0.691294	1	1	1	1	1	0.964785	1	0.535724	0.477346	1.00121	1.00121	1	0.709905	0.64248	0.263408	0.430084
Cluster_Asparagine	0.0581045	1.00033	0.851993	1	1	0.765116	0.867294	0.0167382	1	1	0.207929	1	1	0.367688	0.42856	0.0395993	1	0.0239378	1	1	1	0.904074	1	0.0350898	0.13245	1	0.277772	0.754725	1	1	0.751463	1	0.217892	1	1	1	1	0.0151899	0.419294	1	0.0664811	1	1.00033	1.00033	1	0.740132	0.886383	0.121342	1
Cluster_Autophagy	0.069497	1.00077	0.952408	0.481033	1	0.885362	0.756582	0.255846	0.744587	0.142975	1	1	1	1	0.454818	0.0497244	1	1	1	1	1	0.979515	1	0.725754	0.789283	0.665424	0.538043	0.875695	1	0.170701	0.872593	1	0.918971	1	1	1	1	1	0.928122	1	1	1	1.00077	1.00077	0.295045	0.2624	0.971493	0.765458	0.917628
Cluster_AZF1	1	1.00121	0.55567	1	1	0.374516	0.251917	0.302946	0.989267	0.0837725	0.574761	0.046272	1	0.974332	0.467474	0.0435014	0.619022	0.396053	1	1	1	0.690785	1	0.753218	0.526514	0.124063	0.432465	0.356193	1	0.25487	0.350578	1	0.980744	1	1	1	1	0.565818	0.709227	1	0.535724	0.0832789	1.00121	1.00121	0.0973339	0.232938	0.64248	0.486811	0.209919
Cluster_BAS1	0.494628	1.00121	0.891242	0.257614	1	0.759486	0.251917	0.0013934	0.775166	1	0.0436311	0.203588	1	0.113135	0.20525	0.13367	0.619022	0.870661	1	1	1	0.950817	1	0.274327	0.126263	0.333833	0.204864	0.741922	1	1	0.736354	1	0.889166	0.0214696	1	1	1	1	0.964785	1	0.848138	1	1.00121	1.00121	0.0973339	0.877338	0.932685	0.486811	0.0779647
Cluster_Biotin	0.378395	1.00033	0.851993	1	1	0.765116	0.484815	0.0167382	0.709455	1	1	1	1	0.795561	0.848221	0.26941	1	0.20137	1	1	1	0.904074	1	0.251438	0.13245	0.794167	0.958067	0.754725	0.0465441	1	0.751463	1	0.65928	1	0.00524474	1	1	0.203422	0.419294	1	1	0.541267	1.00033	1.00033	1	0.740132	0.886383	0.492694	1
Cluster_CAD1	1	1.00099	0.618354	1	1	0.447776	0.234272	0.930147	0.360267	0.602149	1	0.147114	0.28048	0.0292696	0.611802	0.368408	1	0.953216	1	1	1	0.73887	1	0.0388477	0.983109	0.484581	0.615215	0.429773	0.133275	1	0.424223	1	0.960496	1	1	1	0.244398	1	0.296605	1	0.786028	0.645815	1.00099	1.00099	0.362093	0.375923	0.696325	0.0850367	0.00426238
Cluster_CBF1	0.0859007	1.00132	0.873813	0.0851683	1	0.726625	0.0635719	0.627462	0.619273	1	0.0550315	1	0.0668751	0.592408	0.997525	0.951686	1	0.245904	1	1	1	0.667925	0.155828	0.59007	0.936142	0.272575	0.975692	0.70739	1	1	0.318694	1	0.280274	1	1	1	1	1	0.644153	1	1	0.116806	1.00132	1.00132	1	0.391613	0.617136	0.374008	0.747067
Cluster_CHA4	0.110262	1.00143	0.499328	0.326368	1	0.313229	0.68365	0.685054	0.689477	0.73595	0.253225	0.0716054	1	0.67657	0.80398	0.873566	0.680373	0.310818	1	1	1	0.64582	1	0.0310595	0.315493	0.678559	0.874837	0.896055	1	0.293708	0.892493	1	0.58423	1	1	1	0.332945	0.626969	0.124067	1	0.892228	0.34472	1.00143	1.00143	1	0.550568	0.909303	0.278263	0.79745
Cluster_CIN5	0.128038	1.00264	0.277223	0.364496	1	0.117138	0.541149	0.773775	0.871502	0.417777	0.544886	0.557856	0.584604	0.7106	0.260501	0.436724	0.327273	0.732077	1	1	1	0.445883	0.287534	0.55206	0.868371	0.599312	0.367014	0.104985	1	0.473944	0.345248	1	0.988662	1	1	1	0.526656	0.531677	0.977858	1	0.910312	0.671747	1.00264	1.00264	0.327638	0.744792	0.38061	0.40054	0.434787
Cluster_CRZ1	0.133455	1.00099	0.618354	0.569762	1	0.824275	0.725868	0.713707	0.0450473	1	0.141614	0.147114	1	0.111839	0.309842	0.156656	1	0.0849826	1	1	1	0.73887	1	0.33527	0.27346	0.210685	0.343047	0.429773	1	1	0.424223	1	0.960496	1	1	1	1	1	0.296605	1	0.156906	0.128222	1.00099	1.00099	1	0.854537	0.696325	0.736518	0.26999
Cluster_CUP9	0.215399	1.00066	0.725852	1	1	0.913345	0.637128	0.830331	0.915626	0.459005	1	1	1	0.783309	0.995713	0.918106	0.409166	0.870111	1	1	1	0.817322	1	0.308028	0.674487	0.125982	0.998245	0.988369	1	1	0.564641	1	0.883959	1	1	1	1	1	0.530335	1	1	0.137215	1.00066	1.00066	1	0.679483	0.785644	0.88607	0.255416
Cluster_DAL81	0.825206	1.00121	0.55567	0.643336	1	0.759486	0.472599	0.562965	0.539778	1	0.574761	1	1	0.728938	0.0446709	0.13367	0.619022	0.870661	1	1	1	0.690785	1	0.753218	0.747372	0.333833	0.0625021	0.356193	1	1	0.350578	1	0.434905	1	1	1	1	0.189271	0.450462	1	0.243826	0.0224416	1.00121	1.00121	0.422778	0.961165	0.64248	0.106986	0.430084
Cluster_DAL82	0.07264	1.00176	0.425324	0.776872	1	0.848932	0.370243	0.391051	0.944787	0.805865	0.0273068	0.720423	1	0.5087	0.206952	0.140713	0.145641	0.302042	1	1	1	0.583783	1	0.013884	0.628748	0.478453	0.695903	0.573697	1	0.348216	0.21761	1	0.555507	1	1	1	0.392498	0.702952	0.624804	1	0.236314	0.0159595	1.00176	1.00176	1	0.872828	0.525346	0.000223591	0.33973
Cluster_DIG1	0.494628	1.00121	0.891242	0.257614	0.0900439	0.374516	0.472599	0.302946	0.0412991	1	0.196406	1	1	0.728938	0.467474	0.549087	0.234534	0.185114	1	1	1	0.690785	1	0.274327	0.296819	0.0223887	0.204864	0.356193	1	1	0.350578	1	0.0221735	1	1	1	1	1	0.709227	1	0.243826	0.0224416	1.00121	1.00121	1	0.471147	0.64248	0.486811	0.886995
Cluster_DOT6	0.819189	1.00319	0.550519	0.487019	1	0.54447	0.602919	0.47257	0.688137	0.948865	0.895302	0.662062	1	0.00221041	0.124462	0.701212	0.444306	0.77349	1	1	1	0.376725	1	0.211258	0.156147	0.51717	0.156919	0.253265	0.0759477	1	0.245769	1	0.132955	1	1	1	0.222628	0.157696	0.379442	1	0.300717	0.999471	1.00319	1.00319	0.765482	0.196686	0.68239	0.85629	0.987965
Cluster_DrugResistance	1	1.00088	0.652294	0.155954	0.0663124	0.48961	0.341302	0.647509	0.267452	0.559225	0.463016	1	1	0.904615	0.376944	0.81718	1	0.720938	1	1	1	0.764149	1	0.246648	0.96898	0.271551	0.172752	0.472073	1	1	0.839971	1	0.196786	1	1	1	1	1	0.363239	1	0.746022	1	1.00088	1.00088	0.0545261	0.467011	0.724912	0.849091	0.942348
Cluster_Endocytosis	1	1.00121	0.55567	0.643336	1	0.374516	0.100618	1	0.539778	0.016813	0.196406	1	1	0.270882	0.467474	0.549087	0.619022	0.185114	0.0332152	1	1	0.690785	1	0.11332	0.971822	0.333833	0.204864	0.741922	1	1	0.350578	1	0.691294	1	1	1	1	0.565818	0.883074	1	0.848138	0.755344	1.00121	1.00121	0.422778	0.877338	0.64248	0.106986	0.98024
Cluster_FattyAcid	0.645491	1.00242	0.308544	0.127855	1	0.140089	0.00646248	0.508951	0.0852172	0.895093	0.224232	1	1	0.979145	0.338772	0.814717	0.56204	0.915665	1	1	0.327312	0.476967	1	0.615966	0.452397	0.836125	0.310585	0.126708	1	1	0.393231	1	0.334397	1	1	1	0.496176	0.484619	0.834522	1	0.695957	0.975296	1.00242	1.00242	1	0.0345458	0.412556	0.246676	0.835465
Cluster_FHL1	0.663219	1.00496	0.0899634	0.779668	1	0.248612	0.677315	0.749997	0.230775	0.1427	1.073e-09	0.972413	0.218482	0.179837	0.432739	0.245451	0.325564	0.200207	1	1	0.556031	0.219542	1	0.956367	0.666705	0.0591085	0.366105	0.0791879	0.157925	0.333682	0.0751726	1	0.910734	1	1	1	1	0.418801	0.2717	1.00001	0.732569	0.0713475	1.00496	1.00496	0.0662453	0.956332	0.163108	0.473742	0.906892
Cluster_FKH1	0.613673	1.00066	0.725852	1	1	0.585348	0.982406	0.480004	0.328112	0.459005	0.0684017	1	0.197008	0.783309	0.836858	0.918106	0.409166	0.0614898	1	1	1	0.817322	1	0.308028	0.674487	0.935845	0.652177	0.905778	1	1	0.903344	1	0.883959	1	1	1	1	1	0.828243	1	0.642191	1	1.00066	1.00066	1	0.679483	0.979099	0.647124	0.882312
Cluster_FKH2	0.958117	1.0022	0.343396	0.544977	1	0.480969	0.0165002	0.918023	0.0143816	1	0.788923	0.796779	0.519025	0.277228	0.633252	0.864693	0.827174	0.0368309	1	1	1	0.510211	1	0.175004	0.622369	0.447731	0.425799	0.971699	1	1	0.446116	1	0.895788	1	1	1	0.463741	0.780778	0.611126	1	0.630303	0.298549	1.0022	1.0022	1	0.808428	0.447176	0.122194	0.391465
Cluster_Flavin	0.469519	1.00044	0.807686	0.312535	1	0.699778	0.672202	1	0.415061	1	1	1	1	0.0284678	0.744982	0.811374	1	1	1	1	1	0.874182	1	1	0.942295	0.665988	0.567435	0.687135	1	1	0.683178	1	0.762048	1	1	1	1	0.261592	0.948407	1	1	0.226372	1.00044	1.00044	1	0.196905	0.851448	0.06006	0.348078
Cluster_Flocculation	1	1.00022	0.898724	1	1	0.836545	0.239951	1	0.113975	1	1	0.147159	1	0.652937	0.939488	0.56564	0.00703825	0.493475	1	1	1	0.934984	1	0.547714	0.259864	0.501397	0.879277	0.991994	1	1	0.826564	1	0.512151	1	1	1	1	1	0.936766	1	1	1	1.00022	1.00022	1	1	0.922748	0.245126	0.509854
Cluster_FZF1	0.494628	1.00121	0.55567	0.643336	1	0.374516	0.251917	0.562965	0.539778	1	0.574761	1	0.331263	0.728938	0.467474	0.931924	0.619022	0.185114	1	1	0.179725	0.690785	1	0.11332	0.747372	0.333833	0.204864	0.741922	0.160407	1	0.350578	1	0.980744	1	1	1	1	0.0410727	0.0412287	1	0.243826	0.477346	1.00121	1.00121	1	0.471147	0.64248	0.714613	0.687091
Cluster_GAL4	1	1.00088	0.652294	0.527473	1	0.48961	0.341302	0.906098	0.542374	0.559225	0.463016	0.120292	1	0.706978	0.891698	0.274296	1	0.0492503	1	1	1	0.764149	1	0.795232	0.868055	0.820449	0.711832	0.843734	1	0.192592	0.46665	1	0.943422	1	1	1	0.220489	1	0.363239	1	0.746022	0.0863991	1.00088	1.00088	1	0.467011	0.724912	1	0.0577932
Cluster_Galactose	1	1.00033	0.851993	0.245003	1	0.765116	0.11752	1	1	0.264437	1	1	1	0.795561	1	1	1	0.0239378	1	1	1	0.904074	1	0.695852	1	0.355012	1	0.977412	1	0.0770683	0.751463	1	1	1	1	1	1	1	0.419294	1	1	0.541267	1.00033	1.00033	1	0.295616	0.886383	1	0.656871
Cluster_GAT1	0.850852	1.00132	0.873813	1	1	0.726625	0.360009	0.627462	0.82713	1	1	0.232648	1	0.363843	0.949446	1	0.651041	0.471127	1	1	1	0.667925	1	0.35169	0.413907	0.0943607	0.792885	0.914583	1	1	0.70131	1	0.986557	1	1	1	0.311828	1	0.839374	1	0.872067	0.798223	1.00132	1.00132	0.450924	0.180046	0.617136	0.374008	0.747067
Cluster_GAT3	0.547294	1.00055	0.765679	1	1	0.640014	0.481019	1	0.872581	1	0.321961	1	1	0.0955835	0.900682	0.875709	0.0593173	0.81746	1	1	1	0.845276	1	1	0.971726	0.544953	0.768769	0.625591	1	1	0.621091	1	1	1	1	1	1	1	0.894949	1	1	0.0823194	1.00055	1.00055	1	0.459933	0.817886	0.181403	0.831864
Cluster_GCN4	0.88612	1.00264	0.643045	0.161848	1	0.663053	0.0253251	0.000145312	0.593878	1	0.0997973	0.557856	0.584604	0.246194	0.260501	0.60708	0.327273	0.984119	1	1	1	0.812629	0.287534	0.55206	0.00433531	0.255349	0.21769	0.63476	1	1	0.625837	1	0.61785	1	1	1	1	0.531677	0.600768	1	0.752376	0.0765265	1.00264	1.00264	0.327638	0.931928	0.756264	0.834928	0.434787
Cluster_GCR1	0.273759	1.00077	0.688093	0.481033	1	0.535346	0.2102	1	0.0477313	0.511677	0.0115862	1	1	0.0217724	0.138402	0.946044	0.458796	0.90758	1	1	1	0.79029	0.094066	0.415817	0.943749	0.665424	0.238006	0.51853	1	1	0.872593	1	0.127932	1	1	1	1	0.411861	0.441135	1	0.304093	0.837779	1.00077	1.00077	1	0.0581698	0.754669	0.765458	0.917628
Cluster_GCR2	0.443004	1.0011	0.586176	0.60827	1	0.792144	0.352227	0.769121	0.221921	0.0655108	0.168629	1	0.306334	0.394313	0.785167	0.228826	0.584068	0.585439	1	1	1	0.958879	1	0.0176818	0.401226	0.404614	0.520636	0.991371	0.146948	1	0.771391	1	0.62137	1	1	1	1	1	0.240498	1	0.819737	0.704799	1.0011	1.0011	1	0.297904	0.943487	0.163867	0.850649
Cluster_GeneralTFs	0.0610155	1.0022	0.343396	0.544977	0.157723	0.16753	0.848229	0.918023	0.20196	0.871197	1	1	0.519025	0.893744	0.430868	0.36566	0.827174	0.193082	1	1	1	0.510211	1	0.000708776	0.622369	0.0415615	0.770028	0.152919	1	1	0.446116	1	0.232176	1	1	1	1	0.0534195	0.781235	1	0.630303	0.961703	1.0022	1.0022	1	0.659914	0.447176	0.734261	0.964576
Cluster_GLN3	0.503735	1.00198	0.760151	1	1	0.9385	0.213909	0.714203	0.780688	0.841866	0.0407897	1	1	0.295186	0.31916	0.244601	1	0.807877	1	1	1	0.545763	1	0.566944	0.136175	0.564802	0.0812799	0.929053	1	1	0.779247	1	0.941796	1	1	1	1	0.744811	0.712388	1	0.311396	0.941073	1.00198	1.00198	1	0.410438	0.484692	0.872814	0.667143
Cluster_Glutamate	0.469519	1.00044	0.807686	1	1	0.961127	0.932325	0.693474	0.807586	1	1	1	1	0.879584	0.951459	0.811374	1	1	1	1	0.0694824	0.874182	1	1	0.70209	0.665988	0.985438	0.957494	1	1	0.956317	1	0.350975	1	1	1	1	1	0.735762	1	1	0.226372	1.00044	1.00044	1	0.888516	0.851448	0.680199	0.759802
Cluster_Glutathione	0.547294	1.00055	0.765679	1	1	0.640014	0.799658	0.771943	0.0473818	0.400659	0.321961	0.328355	0.167092	0.0955835	0.641183	0.221192	1	0.147864	1	1	1	0.845276	1	0.862482	0.824573	0.847541	0.768769	0.933309	1	1	0.993507	1	0.165041	1	1	1	1	0.315519	0.234847	1	0.575317	1	1.00055	1.00055	1	0.459933	0.817886	0.181403	0.831864
Cluster_Glycerol	1	1.00055	0.765679	1	1	0.640014	0.481019	1	0.216242	0.400659	0.321961	1	1	0.336331	0.641183	0.554035	0.354991	0.81746	1	1	1	0.845276	1	0.527476	0.199916	0.847541	0.433213	0.625591	1	0.125131	0.621091	1	0.0313212	1	1	1	1	0.0458821	0.894949	1	0.575317	0.727189	1.00055	1.00055	1	0.459933	0.817886	0.490867	0.831864
Cluster_Glycogen	0.105023	1.00044	0.807686	1	1	0.699778	0.297428	0.0541159	0.114926	0.336029	1	1	1	0.879584	0.323085	0.420898	0.295856	0.743478	1	1	1	0.874182	1	0.795481	0.327296	0.665988	0.181218	0.687135	1	0.10142	0.683178	1	0.762048	1	1	1	1	1	0.313805	1	0.495955	1	1.00044	1.00044	0.0132999	0.591749	0.851448	0.305189	0.348078
Cluster_GTS1	0.668293	1.00165	0.448688	0.393323	1	0.26196	0.668138	0.927037	0.39546	0.436549	0.688487	0.320367	1	0.110634	0.0850859	0.221574	0.362658	0.444081	1	1	1	0.603772	0.19086	0.362765	0.722931	0.320868	0.572507	0.606068	1	1	0.239392	1	0.875942	0.0291682	1	1	1	0.679518	0.681593	1	0.0209514	0.701761	1.00165	1.00165	0.163898	0.402423	0.546931	0.484689	0.277895
Cluster_HAL9	1	1.00099	0.618354	0.569762	1	0.447776	0.0168096	0.415816	0.360267	0.215837	1	1	1	0.937875	0.309842	0.368408	0.171054	0.505612	1	1	1	0.73887	1	0.848629	0.27346	0.484581	0.343047	0.429773	1	0.213907	0.424223	1	0.806825	1	1	1	1	1	0.596457	1	1	0.128222	1.00099	1.00099	0.362093	0.649186	0.696325	0.905378	0.536906
Cluster_HAP2	0.252291	1.00132	0.526747	0.0851683	1	0.726625	0.360009	0.627462	0.38079	1	0.00942988	0.615434	1	0.592408	0.850582	0.628498	0.0731724	0.901146	1	1	1	0.667925	1	0.35169	0.413907	0.744889	0.792885	0.324266	1	1	0.70131	1	0.750985	1	1	1	1	0.216751	0.155428	1	0.872067	0.540951	1.00132	1.00132	0.450924	0.933204	0.617136	0.599614	0.275925
Cluster_HAP3	0.265082	1.00198	0.382175	0.0706889	1	0.805329	0.213909	0.152647	0.603006	0.841866	0.0407897	0.761635	1	0.474326	0.31916	0.0501428	0.793972	0.421645	1	1	1	0.545763	1	0.370757	0.136175	0.949464	0.1944	0.511841	1	1	0.925915	1	0.471343	1	1	1	1	0.382359	0.300351	1	0.555435	0.617118	1.00198	1.00198	1	0.775624	0.484692	0.576478	0.140198
Cluster_HAP4	0.230947	1.00187	0.403174	0.190021	1	0.567344	0.020022	0.667645	0.731332	0.503114	0.00103273	0.741849	1	0.588494	0.7775	0.961546	0.0108472	0.192866	1	1	0.26382	0.564454	1	0.501548	0.853624	0.417107	0.627306	0.542257	1	1	0.534446	1	0.616728	1	1	1	1	0.355391	0.160063	1	0.945736	0.568016	1.00187	1.00187	1	0.924096	0.504611	0.48373	0.611044
Cluster_HAP5	0.133965	1.00209	0.362268	0.516802	1	0.508786	0.643618	0.354542	0.472977	1	0.165494	1	1	0.55109	0.682774	0.163157	0.210308	0.480833	1	1	1	0.871102	0.235336	0.434998	0.202868	0.973125	0.674222	0.761091	1	1	0.912614	1	0.722858	1	1	1	1	1	0.459231	1	0.593992	0.121781	1.00209	1.00209	0.613109	0.934854	0.465557	0.660765	0.333953
Cluster_Heme	1	1.00077	0.952408	0.481033	1	0.885362	0.477856	0.569667	0.744587	1	1	1	0.225853	0.855206	0.764661	0.446844	1	0.90758	1	1	1	0.979515	1	0.725754	0.242858	0.884319	0.991369	0.980988	1	1	0.872593	1	0.918971	1	1	1	1	1	0.928122	1	1	0.837779	1.00077	1.00077	1	0.826058	0.754669	0.765458	0.67042
Cluster_HIR1	0.718675	1.00088	0.652294	0.527473	1	0.48961	0.960249	1	0.267452	1	1	0.471096	1	0.904615	0.891698	0.550372	1	0.720938	1	1	1	0.764149	1	0.795232	0.96898	0.063133	0.975657	0.472073	1	1	0.46665	1	0.747816	1	1	1	0.220489	0.454828	0.0984157	1	0.746022	1	1.00088	1.00088	1	0.467011	0.724912	0.62607	0.744583
Cluster_HIR2	1	1.00088	0.652294	0.155954	1	0.48961	0.131539	0.647509	0.542374	0.559225	0.463016	0.471096	1	0.904615	0.688439	0.550372	0.140534	0.720938	1	1	1	0.764149	1	0.795232	0.657995	0.063133	0.89688	0.472073	1	1	0.46665	1	0.747816	1	1	1	1	1	0.363239	1	1	0.26934	1.00088	1.00088	1	0.467011	0.724912	0.138125	0.193796
Cluster_Histidine	1	1.00077	0.688093	0.481033	1	0.535346	0.756582	0.0142561	0.439278	1	1	0.427245	1	0.107058	0.764661	0.946044	0.458796	0.645299	1	1	1	0.79029	1	0.415817	0.242858	0.346766	0.538043	0.875695	1	1	0.513315	1	0.127932	1	1	1	1	1	0.441135	1	0.698541	0.50071	1.00077	1.00077	1	0.2624	0.754669	0.0592955	0.917628
Cluster_HMS1	0.718675	1.00088	0.652294	0.155954	1	0.974955	0.341302	0.647509	0.542374	0.559225	1	0.471096	1	0.904615	0.688439	0.550372	0.504262	0.418381	1	1	1	0.764149	1	0.0819685	0.657995	0.271551	0.89688	0.843734	1	1	0.839971	1	0.747816	1	1	1	0.220489	0.454828	0.363239	1	0.366177	0.26934	1.00088	1.00088	0.329405	0.467011	0.724912	0.62607	0.0577932
Cluster_HSF1	0.668293	1.00165	0.448688	0.393323	0.0070296	0.26196	0.0503672	0.559849	0.39546	0.784902	0.310354	1	1	0.630065	0.0850859	0.221574	0.731855	0.668016	1	1	1	0.603772	1	0.576998	0.722931	0.987441	0.0640076	0.244636	1	0.330529	0.239392	0.103115	0.489773	1	1	1	1	0.679518	0.0781539	1	0.427949	0.889458	1.00165	1.00165	0.527409	0.616904	0.546931	0.0547551	0.873172
Cluster_IME4	1	1.00099	0.618354	1	1	0.824275	0.234272	0.176789	0.360267	0.0493308	0.141614	1	0.28048	0.111839	0.0786347	0.368408	1	0.505612	1	1	1	0.73887	1	0.135869	0.0224026	0.748066	0.124096	0.429773	1	0.213907	0.80607	1	0.960496	1	1	1	1	0.494661	0.296605	1	1	0.645815	1.00099	1.00099	1	0.649186	0.696325	0.488011	0.803919
Cluster_INO2	0.588222	1.00143	0.499328	0.704341	1	0.693833	0.11799	0.435491	0.109727	1	0.636033	0.644893	0.378472	0.67657	0.597571	0.698281	0.299061	0.142042	1	1	1	0.64582	1	0.851483	0.053271	0.0714215	0.874837	0.295197	1	1	0.892493	1	0.58423	1	1	1	0.332945	1	0.5792	1	0.134926	0.155606	1.00143	1.00143	1	0.550568	0.592789	0.278263	0.579121
Cluster_INO4	0.703358	1.00176	0.425324	0.42567	1	0.239561	0.370243	0.9427	0.274837	1	0.711812	0.349203	1	0.945293	0.820873	0.849514	0.393661	0.148678	1	1	1	0.583783	1	0.432915	0.628748	0.26834	0.935923	0.222699	1	1	0.21761	1	0.758485	1	1	1	0.392498	1	0.39943	1	0.0932176	0.744724	1.00176	1.00176	1	0.73623	0.525346	0.0978915	0.75404
Cluster_InvasiveGrowth	1	1.00033	0.851993	1	1	0.765116	0.11752	0.588021	0.709455	1	0.207929	1	1	0.367688	0.848221	0.713755	1	1	1	1	1	0.904074	1	0.695852	0.514693	0.794167	0.721696	0.754725	1	1	0.751463	1	0.65928	1	1	1	1	0.203422	0.984107	1	0.401774	0.541267	1.00033	1.00033	1	0.295616	0.886383	0.871353	1
Cluster_Isoleucine	0.215399	1.00066	0.725852	0.0940196	1	0.585348	0.100095	0.00516422	0.104371	0.459005	0.00700738	1	1	0.958234	0.543345	0.663726	1	0.0614898	1	1	1	0.817322	1	0.907538	0.0175263	0.759236	0.323731	0.569554	1	1	0.564641	1	0.583166	1	1	1	0.170387	1	0.530335	1	1	0.789626	1.00066	1.00066	0.258929	0.899466	0.785644	0.647124	0.579624
Cluster_IXR1	0.331876	1.00088	0.652294	0.155954	1	0.48961	0.614411	0.33614	0.267452	0.559225	0.463016	0.471096	1	0.431212	0.376944	0.274296	1	0.720938	1	1	1	0.764149	1	0.517319	0.157658	0.820449	0.711832	0.843734	1	1	0.46665	1	0.747816	1	1	1	1	1	0.884186	1	0.366177	0.26934	1.00088	1.00088	0.329405	0.911663	0.724912	0.352617	0.942348
Cluster_LEU3	0.0143594	1.00121	0.55567	0.643336	1	0.759486	0.472599	0.124163	0.539778	0.675874	0.574761	0.583535	0.331263	0.497173	0.467474	0.308122	0.619022	0.870661	1	1	1	0.690785	1	0.51061	0.296819	0.333833	0.204864	0.356193	1	1	0.736354	1	0.213546	1	1	1	0.290046	0.565818	0.193839	1	1	0.229956	1.00121	1.00121	0.0973339	0.471147	0.64248	0.964944	0.209919
Cluster_Leucine	1	1.00055	0.765679	1	1	0.994565	0.175033	0.771943	1	1	1	1	0.167092	0.929079	0.243561	0.554035	1	1	1	1	1	0.845276	1	0.527476	0.971726	0.847541	0.118219	0.625591	1	1	0.621091	1	0.165041	1	1	1	1	0.315519	0.234847	1	1	0.0823194	1.00055	1.00055	1	0.459933	0.817886	0.806421	0.162863
Cluster_Lysine	0.613673	1.00066	0.725852	0.0940196	1	0.585348	0.32491	0.00516422	0.104371	1	0.372673	0.0713023	1	0.47819	0.183604	0.334655	1	0.554204	1	1	1	0.817322	1	1	0.0175263	0.759236	0.077117	0.569554	1	1	0.564641	1	0.883959	1	1	1	1	1	0.530335	1	1	0.415003	1.00066	1.00066	0.258929	0.0873455	0.785644	0.983466	1
Cluster_MAC1	1	1.0011	0.586176	1	1	0.792144	0.155636	0.237934	0.452498	0.253419	0.540365	0.548995	1	0.959912	0.537503	0.461463	1	0.130776	1	1	1	0.714424	1	0.424689	0.401226	0.162203	0.520636	0.946769	1	1	0.771391	1	0.354411	1	1	1	1	0.162326	0.521034	1	0.482652	0.704799	1.0011	1.0011	1	0.923062	0.668863	0.611067	1
Cluster_MAL13	0.265082	1.00198	0.382175	0.48749	1	0.537596	0.863211	0.50469	0.90507	0.0905777	1	0.761635	0.482462	0.15644	0.870179	0.971894	0.188044	0.626944	1	1	1	0.882207	1	0.207038	0.440191	0.0167926	0.736029	0.785587	0.031998	0.382206	0.779247	1	0.471343	1	0.0310839	1	1	0.0378431	0.512633	1	0.311396	0.990722	1.00198	1.00198	0.0543333	0.891795	0.484692	0.576478	0.940099
Cluster_MAL33	0.380685	1.00165	0.448688	0.754922	1	0.26196	0.668138	0.161445	0.39546	0.784902	0.688487	0.697222	1	0.239362	0.86041	0.221574	0.731855	0.668016	1	1	1	0.603772	1	0.776937	0.169336	0.141002	0.959822	0.854928	1	0.330529	0.598783	1	0.707741	1	1	1	0.37326	1	0.681593	1	0.923524	0.24554	1.00165	1.00165	0.00493328	0.20792	0.546931	0.290204	0.484133
Cluster_Maltose	0.670325	1.00077	0.688093	1	1	0.535346	0.477856	0.569667	0.439278	1	1	0.427245	1	0.603566	0.454818	0.185069	0.458796	0.645299	1	1	1	0.79029	1	0.725754	0.789283	0.346766	0.538043	0.51853	1	1	0.513315	1	0.356361	1	1	1	1	1	0.986803	1	0.698541	0.00860379	1.00077	1.00077	0.295045	0.569551	0.754669	0.0592955	0.917628
Cluster_ManualAFT1targets	1	1.00044	0.807686	1	1	0.699778	0.297428	0.0541159	0.807586	0.336029	0.0302458	1	1	1	0.744982	0.420898	1	0.327675	1	1	1	0.874182	1	0.0114827	0.327296	0.251354	0.567435	0.687135	1	1	0.683178	1	0.762048	1	1	1	1	1	0.735762	1	1	0.646232	1.00044	1.00044	1	0.888516	0.851448	0.305189	1
Cluster_ManualG1genes	0.136245	1.00452	0.363333	0.892558	1	0.867141	0.0831871	0.757721	0.778664	0.985102	0.600759	0.384495	0.777368	0.662547	0.890252	0.933908	0.680816	0.176141	1	1	1	0.251295	1	0.735684	0.856601	0.886389	0.978202	0.493422	1	1	0.971109	1	0.0816709	1	1	1	0.721665	0.811649	0.538887	1.00001	2.5755e-21	0.616393	1.00452	1.00452	0.871484	0.99421	0.51557	0.598545	0.598597
Cluster_ManualHAP1targets	0.513779	1.00352	0.180622	0.554838	0.240288	0.228832	0.259208	0.597721	0.156323	0.614462	0.00196338	0.922019	0.690218	0.993513	0.966813	0.814862	5.24803e-06	0.302102	1	1	0.438424	0.340476	1	0.128084	0.613522	0.241195	0.975169	0.4443	1	1	0.434033	0.207357	0.362952	1	1	1	0.25694	0.68928	0.585807	1.00001	0.0212389	0.621789	1.00352	1.00352	1	0.75588	0.27567	0.548154	0.655798
Cluster_ManualMethionine	0.81393	1.0022	0.343396	0.846713	1	0.480969	0.0165002	0.0467683	0.857962	0.871197	4.73745e-07	0.796779	0.160071	0.780616	0.633252	0.549591	0.0811133	1	1	1	1	0.510211	1	0.498151	0.151077	0.262205	0.610351	0.73616	1	1	0.728827	0.135102	0.116092	0.038711	1	1	1	1	0.408599	1	0.38823	0.298549	1.0022	1.0022	0.0707096	0.0173198	0.447176	0.237643	0.892961
Cluster_ManualM-G1genes	1	1.00044	0.807686	0.312535	1	0.699778	0.0575504	0.271662	0.807586	1	1	1	1	0.191882	0.323085	0.117922	1	0.743478	1	1	1	0.874182	1	0.795481	0.327296	0.251354	0.567435	0.687135	1	1	0.683178	0.0285866	1	1	1	1	1	0.261592	0.735762	1	0.119231	0.646232	1.00044	1.00044	1	0.888516	0.851448	0.680199	1
Cluster_ManualYap1Targets	0.380307	1.00374	0.162267	0.596954	1	0.200305	0.385697	0.0712849	1.23279e-05	0.107014	0.472362	0.114289	0.12147	0.29421	0.376822	0.934958	1	0.681521	0.0992621	1	1	0.318263	1	0.438578	0.138057	0.595657	0.203578	0.178486	1	0.0117648	0.391932	0.218808	0.313528	1	1	1	0.6536	0.924385	0.349185	1.00001	0.281095	0.530287	1.00374	1.00374	0.0232078	0.66823	0.254301	0.409546	0.966704
Cluster_ManualZAP1targets	0.76422	1.00198	0.936286	0.213887	1	0.805329	0.373726	0.302921	0.115015	1	0.393963	1	0.482462	0.474326	0.731161	0.41839	0.793972	0.981877	1	1	1	0.545763	1	0.370757	0.26705	0.564802	0.943199	0.511841	1	1	0.179805	0.122444	0.28305	1	1	1	0.429226	0.744811	0.857754	1	0.555435	0.941073	1.00198	1.00198	0.59326	0.985484	0.843231	0.746676	0.140198
Cluster_ManualZAP1targets-2	0.140778	1.00518	0.555098	0.412487	1	0.626501	0.154622	0.688082	0.206401	0.0814732	0.470764	0.976492	0.507228	0.474052	0.502908	0.435347	0.767276	0.953432	1	1	1	0.205199	0.485605	0.717901	0.665443	0.607068	0.644954	0.0679724	0.526936	0.353006	0.371086	0.00465317	0.329979	1	1	1	0.769287	0.677214	0.600611	1.00001	0.62499	0.973159	1.00518	1.00518	0.00174871	0.80942	0.441999	0.473169	0.0822983
Cluster_MATa1	1	1.00143	0.499328	0.326368	1	0.313229	0.11799	0.88286	1	0.365428	0.636033	0.644893	0.378472	0.67657	0.597571	0.260312	0.680373	0.142042	1	1	1	0.64582	1	0.226797	0.960411	0.220527	0.508211	0.673087	1	1	0.289706	1	0.801012	1	1	1	0.00648129	1	0.327909	1	0.336206	0.965919	1.00143	1.00143	1	0.137769	0.592789	0.950475	0.018107
Cluster_Mating
Cluster_MBP1	0.406518	1.00242	0.308544	0.313768	1	0.711397	0.0551881	0.323661	0.654188	0.363082	0.497509	1	0.0425969	0.86547	0.71487	0.49036	0.855032	0.0290202	1	1	1	0.476967	0.267093	0.028319	0.767831	0.527813	0.897924	0.401501	0.295234	0.444982	0.677348	0.147579	0.839506	1	1	1	1	0.811683	0.158232	1	4.93572e-07	0.975296	1.00242	1.00242	0.291113	0.835929	0.412556	0.246676	0.328147
Cluster_MCM1	0.703358	1.00176	0.425324	1	1	0.239561	0.0907613	0.9427	0.274837	1	1	0.720423	0.443128	0.945293	0.206952	0.140713	1	0.508645	1	1	1	0.583783	1	0.934929	0.967804	0.686361	0.296267	0.573697	1	1	0.94914	0.109604	0.903048	1	1	1	1	1	0.972025	1	0.935579	0.910135	1.00176	1.00176	1	0.995939	0.8707	0.386487	0.900664
Cluster_MET31	0.759939	1.00099	0.618354	1	0.07429	0.964775	0.725868	0.00155109	0.360267	1	0.141614	0.511594	1	0.788206	0.841713	0.368408	1	0.243919	1	1	1	0.73887	1	0.608343	0.0224026	0.748066	0.832603	0.810472	1	1	0.80607	1	0.541282	1	1	1	1	1	0.296605	1	0.786028	0.128222	1.00099	1.00099	0.0678952	0.375923	0.696325	0.905378	0.959652
Cluster_MET4	0.872738	1.00143	0.855784	0.704341	1	0.906982	0.00923418	0.0882058	0.689477	1	0.0128281	0.644893	1	0.67657	0.80398	0.260312	0.0894058	0.770994	1	1	1	0.64582	1	0.661325	0.733748	0.678559	0.874837	0.673087	1	1	0.66655	1	0.801012	1	1	1	1	1	0.790296	1	0.336206	0.599821	1.00143	1.00143	0.477701	0.965152	0.592789	0.485711	0.79745
Cluster_MIG1	0.668293	1.00165	0.448688	1	1	0.26196	0.468197	0.77966	0.0941176	1	0.688487	0.697222	1	0.630065	0.699617	0.620172	0.362658	0.444081	1	1	1	0.603772	1	0.362765	0.330925	0.543424	0.359455	0.854928	1	1	0.598783	1	0.707741	1	1	1	1	0.679518	0.0781539	1	0.427949	0.460355	1.00165	1.00165	0.527409	0.0786342	0.546931	0.840222	0.484133
Cluster_Mitochondria	0.0732993	1.00341	0.515635	0.778823	1	0.49944	0.596829	0.714595	0.87203	0.35636	0.0776065	0.915535	1	0.791997	0.787007	0.650786	0.747003	0.833081	1	1	1	0.726587	0.354722	0.18282	0.401743	0.276233	0.848546	0.466322	0.0852532	0.563961	0.456094	1	0.197282	1	1	1	0.619571	0.187057	0.0293061	1.00001	0.995098	0.151043	1.00341	1.00341	0.190194	0.380777	0.653213	0.983291	0.613218
Cluster_MitochondrialRPs	0.593723	1.00463	0.105672	0.737992	1	0.1154	0.11219	0.974892	0.972407	0.220345	0.617343	0.633425	1	0.0919005	0.785212	0.34477	0.274992	0.572914	1	1	0.17206	0.593372	1	0.39612	0.816081	0.406884	0.735122	0.473979	0.48763	0.675424	0.252001	1	0.645212	1	1	1	0.37038	0.368012	0.135725	1.00001	0.812576	0.237684	1.00463	1.00463	0.877771	0.926916	0.18412	0.845999	0.163038
Cluster_MOT3	0.718675	1.00088	0.652294	1	1	0.48961	0.341302	0.906098	0.96301	1	0.463016	1	1	0.190833	0.104324	0.0958425	0.504262	0.720938	1	1	1	0.764149	0.106767	0.246648	0.96898	0.271551	0.0328093	0.472073	1	1	0.46665	1	0.452106	1	1	1	1	1	0.972059	1	0.117843	0.874914	1.00088	1.00088	1	0.740453	0.724912	0.995791	0.447934
Cluster_mRNAprocessing	0.567425	1.00685	0.367485	0.661238	1	0.0265002	0.486696	0.310209	0.741161	0.865876	0.852415	0.863372	0.658014	0.596599	0.308538	0.0455875	0.145809	0.227333	1	1	0.673659	0.123565	1	0.00737048	0.511227	0.0543565	0.786922	0.337674	0.627768	0.810414	0.173057	1	0.811384	1	1	1	1	0.0801818	0.274567	1.00002	0.876278	0.450897	1.00685	1.00685	0.587612	0.591386	0.0820219	0.519938	0.71536
Cluster_MSS11	0.137298	1.00154	0.473333	0.730815	1	0.286451	0.3658	0.275823	0.322627	1	0.663278	1	0.400815	0.170707	0.535314	0.548816	0.707242	0.190673	1	1	1	0.624443	1	0.293239	0.633258	0.380216	0.927698	0.268732	1	1	0.263351	1	0.095326	1	1	1	1	0.272459	0.885831	1	0.909214	0.973726	1.00154	1.00154	0.503175	0.849797	0.569399	0.777335	0.219028
Cluster_MTH1	0.543096	1.00132	0.526747	0.292104	1	0.342506	0.0635719	0.627462	0.38079	0.707449	0.606586	0.058287	1	0.363843	0.165712	0.628498	0.266806	0.245904	1	1	0.194376	0.667925	1	0.59007	0.639121	0.272575	0.155366	0.70739	1	0.274548	0.70131	0.0833666	0.750985	1	1	1	1	1	0.644153	1	0.106033	0.286531	1.00132	1.00132	0.450924	0.630215	0.617136	0.374008	0.914981
Cluster_NDD1	0.871	1.00253	0.292465	0.884343	1	0.128101	0.00397668	0.956848	0.705469	0.669994	0.521591	1	0.569096	0.486422	0.670427	0.550295	0.867231	0.0959116	1	1	1	0.461164	1	0.32614	0.911436	0.297085	0.596098	0.95079	1	0.459656	0.651539	1	0.948004	1	1	1	1	0.825463	0.799114	1	0.725299	0.134114	1.00253	1.00253	1	0.792424	0.771026	0.189109	0.119505
Cluster_NRG1	1	1.00066	0.725852	0.430035	1	0.585348	0.32491	1	0.104371	0.459005	0.372673	0.379765	0.197008	0.783309	0.836858	0.663726	1	0.0614898	1	1	1	0.817322	1	0.308028	0.362244	0.125982	0.978439	0.569554	1	1	0.903344	1	0.883959	1	1	1	1	0.0655468	0.530335	1	1	0.789626	1.00066	1.00066	0.258929	0.899466	0.785644	0.88607	0.882312
Cluster_NuclearProteinTargetting	0.964517	1.00363	0.171199	0.340981	1	0.456388	0.00480515	0.982913	0.961278	0.635688	0.0961192	0.730444	1	0.0409803	0.574363	0.317661	0.777656	0.491082	1	1	1	0.329182	0.372736	0.0194583	0.791055	0.111798	0.866014	0.930411	1	0.215947	0.0429166	1	0.557997	1	1	1	1	0.436814	0.545241	1.00001	0.975008	0.656506	1.00363	1.00363	1	0.821748	0.264771	0.738975	0.695541
Cluster_PDR1	0.273759	1.00077	0.688093	1	1	0.535346	0.2102	0.255846	0.179891	0.511677	1	1	1	0.311022	0.454818	0.750478	1	1	1	1	1	0.79029	1	0.725754	0.521426	0.97449	0.238006	0.51853	1	1	0.513315	1	0.673888	0.0137133	1	1	1	1	0.131519	1	1	0.837779	1.00077	1.00077	1	0.954522	0.754669	0.765458	1
Cluster_PentosePhosphate	0.670325	1.00077	0.688093	1	1	0.535346	0.477856	0.873775	0.00734951	0.511677	1	1	1	0.0217724	0.138402	0.185069	1	0.645299	1	1	1	0.79029	1	0.415817	0.789283	0.0891852	0.538043	0.51853	1	0.170701	0.513315	1	0.356361	1	1	1	1	0.0874259	0.131519	1	1	1	1.00077	1.00077	1	0.0581698	0.754669	0.0592955	0.67042
Cluster_Peroxisome	0.494628	1.00121	0.55567	0.0682578	0.0900439	0.939105	0.702411	0.961349	0.928986	0.0837725	0.574761	0.203588	0.331263	0.728938	0.467474	0.989839	0.619022	0.870661	1	1	1	0.950817	1	0.51061	0.898992	0.333833	0.204864	0.931537	1	1	0.736354	1	0.980744	1	1	1	0.290046	0.189271	0.964785	1	1	0.755344	1.00121	1.00121	1	0.232938	0.64248	0.880461	0.886995
Cluster_PHD1	0.872738	1.00143	0.499328	0.704341	1	0.693833	0.11799	0.88286	0.251954	1	0.253225	0.644893	1	0.989672	0.597571	0.260312	0.680373	0.542376	1	1	1	0.64582	1	0.0310595	0.733748	0.220527	0.874837	0.673087	1	1	0.66655	1	0.801012	1	1	1	1	0.626969	0.790296	1	0.336206	0.834296	1.00143	1.00143	1	0.895932	0.592789	0.485711	0.79745
Cluster_PHO4	1	1.00055	0.765679	1	1	0.640014	0.799658	0.379597	1	0.400659	1	1	1	0.0955835	0.243561	0.875709	0.354991	0.81746	1	1	1	0.845276	1	0.201197	0.518366	0.544953	0.118219	0.625591	1	1	0.621091	1	0.474932	1	1	1	0.144145	1	0.629637	1	1	0.0823194	1.00055	1.00055	0.0214558	0.459933	0.817886	0.181403	0.831864
Cluster_Phospholipid	0.969517	1.00242	0.308544	0.313768	1	0.428467	0.0551881	0.94638	0.173981	0.895093	0.497509	0.826748	1	0.86547	0.534182	0.182737	0.855032	0.804794	1	1	1	0.476967	1	0.989294	0.620077	0.968258	0.955298	0.126708	1	1	0.393231	1	0.692322	1	1	1	0.0284989	0.484619	0.317428	1	0.463791	0.389462	1.00242	1.00242	0.667041	0.204515	0.412556	0.0609348	0.932015
Cluster_Polyamine	0.469519	1.00044	0.807686	1	1	0.699778	0.0575504	0.271662	0.0129792	1	1	1	1	0.879584	0.744982	0.420898	1	0.743478	1	1	1	0.874182	1	0.396965	0.327296	0.251354	0.875956	0.687135	1	1	0.683178	1	0.762048	1	1	1	1	1	0.948407	1	1	0.646232	1.00044	1.00044	1	0.591749	0.851448	0.305189	0.759802
Cluster_primig-EarlySpo	0.899583	1.00275	0.262773	0.904151	1	0.107111	0.183474	0.805374	0.320691	1	0.11215	0.119501	0.599555	0.762328	0.395644	0.105929	0.351027	0.61125	1	1	1	0.431107	1	0.606044	0.690897	0.218024	0.640527	0.819497	1	1	0.600343	0.165964	0.665664	1	1	1	0.541199	0.554082	0.55412	1	0.356685	0.708693	1.00275	1.00275	0.03116	0.219718	0.365575	0.105235	0.659126
Cluster_primig-LateSpo	0.306856	1.00764	0.296452	0.953167	0.447766	0.624948	0.0840605	0.927344	0.283715	0.356087	0.0702517	0.78426	0.101294	0.579802	0.672305	0.15537	0.358572	0.110887	1	1	0.125081	0.59969	1	0.785587	0.741132	0.0348703	0.81505	0.838751	1	0.273848	0.393659	1	0.724234	1	1	1	0.88418	0.888622	0.811057	1.00003	0.284194	0.826971	1.00764	1.00764	0.856426	0.813654	0.484911	0.0625975	0.866563
Cluster_primig-MidSpo	0.950908	1.00209	0.362268	1	1	0.782487	0.0258665	0.899195	0.155557	0.279968	1	0.779906	1	0.859806	0.99803	0.979562	0.210308	0.942751	1	1	1	0.527688	1	0.797508	0.842318	0.838806	0.967249	0.482517	0.260756	1	0.16344	1	0.722858	1	1	1	0.446752	0.763476	0.920389	1	0.593992	0.662563	1.00209	1.00209	0.235985	0.541317	0.465557	0.482825	0.866851
Cluster_Proline	1	1.00044	0.807686	0.312535	1	0.699778	0.297428	0.0541159	0.807586	1	1	0.272689	1	0.879584	0.951459	0.811374	1	0.327675	1	1	1	0.993749	1	0.795481	0.327296	0.665988	0.985438	0.957494	1	1	0.683178	1	0.350975	0.00785808	1	1	1	1	0.735762	1	1	0.0396251	1.00044	1.00044	1	0.196905	0.851448	0.305189	0.759802
Cluster_Proteasome	0.0750319	1.00286	0.249075	1	0.200057	0.0979426	0.138781	0.929409	0.536957	0.930417	0.867726	0.602104	0.61397	0.232634	0.702272	0.836115	1	0.322942	1	1	1	0.416819	1	0.899799	0.93043	0.184993	0.731257	0.584636	1	1	0.0837739	1	0.929214	1	1	1	1	0.575716	0.00517054	1	0.602532	0.742613	1.00286	1.00286	1	0.641123	0.351131	0.958195	0.124678
Cluster_Purine	0.0210532	1.00176	0.799148	0.166898	1	0.597954	0.566151	0.030903	0.944787	1	0.338625	0.349203	1	0.0236991	0.926305	0.684301	0.393661	0.72114	1	1	1	0.903607	0.202214	0.115798	0.251689	0.26834	0.695903	0.832666	0.224603	1	0.566122	1	0.555507	1	1	1	0.00117373	0.328014	0.624804	1	0.935579	0.984386	1.00176	1.00176	0.550463	0.872828	0.8707	0.386487	0.54977
Cluster_PUT3	0.958117	1.0022	0.720841	0.544977	1	0.16753	0.3765	0.406681	0.20196	0.592899	0.447095	0.193569	0.519025	0.893744	0.237131	0.72734	0.827174	0.193082	1	1	0.302596	0.510211	0.24607	0.498151	0.775923	0.447731	0.0463647	0.152919	1	1	0.446116	0.135102	0.116092	1	1	1	1	0.780778	0.0234113	1	0.630303	0.869139	1.0022	1.0022	0.631991	0.907568	0.447176	0.859088	0.583314
Cluster_Pyrimidine	0.629945	1.00154	0.473333	0.730815	1	0.286451	0.190206	0.0429532	0.538359	0.40149	1	1	1	0.993499	0.753215	0.758067	0.707242	0.377564	1	1	0.222902	0.624443	1	0.293239	0.102172	0.176975	0.821975	0.639249	1	1	0.263351	1	0.223189	1	1	1	0.353415	0.272459	0.0986431	1	0.382467	0.198842	1.00154	1.00154	0.146541	0.473917	0.569399	0.00581784	0.415387
Cluster_RAP1	0.718675	1.00088	0.652294	0.527473	1	0.48961	0.0308904	1	0.96301	0.559225	0.00169798	1	1	0.190833	0.688439	0.274296	0.504262	0.720938	1	1	1	0.764149	1	0.795232	0.96898	0.271551	0.711832	0.472073	1	1	0.46665	1	0.452106	1	1	1	1	0.454828	0.674822	1	1	0.577833	1.00088	1.00088	0.329405	0.911663	0.724912	0.849091	0.447934
Cluster_RCS1	0.670325	1.00077	0.952408	0.481033	1	0.885362	0.756582	0.873775	0.439278	0.511677	1	1	1	0.975405	0.454818	0.750478	0.458796	0.645299	1	1	1	0.979515	1	0.164308	0.943749	0.884319	0.538043	0.875695	1	0.170701	0.872593	1	0.127932	1	1	1	1	0.411861	0.753334	1	1	1	1.00077	1.00077	1	0.2624	0.971493	0.934315	0.125795
Cluster_REB1	0.240142	1.00253	0.292465	0.339165	1	0.687248	0.175645	0.557616	0.536974	0.905325	0.244649	0.255701	1	0.0439519	0.297848	0.934524	0.303506	0.932271	1	1	1	0.461164	1	0.188998	0.374035	0.473923	0.596098	0.66012	0.306368	1	0.368631	1	0.566507	1	1	1	0.511653	0.0823023	0.461663	1	0.725299	0.43512	1.00253	1.00253	1	0.892484	0.396262	0.481144	0.559688
Cluster_RFX1	0.110262	1.00143	0.499328	0.704341	1	0.313229	0.26546	0.88286	0.461312	0.0311409	1	0.644893	0.378472	0.67657	0.025373	0.00198999	0.680373	0.142042	1	1	1	0.64582	1	0.851483	0.528723	0.220527	0.116617	0.295197	1	0.00426091	0.66655	1	0.801012	1	1	1	1	1	0.5792	1	0.000225883	0.0547267	1.00143	1.00143	1	0.320967	0.592789	0.12575	1
Cluster_RGM1	1	1.00077	0.688093	1	1	0.535346	0.477856	0.873775	0.179891	0.511677	0.0911279	1	1	0.311022	0.764661	0.185069	1	1	1	1	1	0.79029	1	0.725754	0.789283	0.665424	0.538043	0.51853	1	1	0.513315	1	0.673888	1	1	1	0.195827	0.411861	0.131519	1	1	0.837779	1.00077	1.00077	1	0.954522	0.754669	0.489344	0.67042
Cluster_RGT1	0.300046	1.00209	0.740504	0.831626	1	0.508786	0.464334	0.558315	0.155557	0.564372	0.420842	0.432749	0.501077	0.55109	0.118507	0.485215	0.811301	0.842211	1	1	1	0.527688	1	0.057685	0.842318	0.053578	0.061604	0.16799	0.260756	0.398534	0.474388	1	0.339812	1	1	1	1	0.157352	0.821217	1	0.824551	0.992848	1.00209	1.00209	0.613109	0.186504	0.465557	0.660765	0.181426
Cluster_RIM101	0.703358	1.00176	0.425324	0.42567	1	0.597954	0.747461	0.9427	0.467834	1	0.338625	0.720423	1	0.5087	0.206952	0.140713	0.145641	0.302042	1	1	1	0.583783	1	0.0446356	0.908804	0.478453	0.138154	0.832666	1	1	0.21761	1	0.555507	1	1	1	1	0.328014	0.39943	1	0.472172	0.984386	1.00176	1.00176	0.550463	0.983963	0.525346	0.58289	0.75404
Cluster_RLM1	0.378395	1.00033	0.851993	1	1	0.765116	0.484815	1	0.264994	1	1	1	1	1	0.42856	0.26941	1	0.639527	1	1	1	0.904074	1	0.251438	0.514693	0.794167	0.721696	0.754725	1	1	0.751463	1	0.217892	1	1	1	1	1	0.419294	1	1	1	1.00033	1.00033	0.139123	0.962829	0.886383	0.492694	0.656871
Cluster_RME1	1	1.00044	0.807686	1	1	0.699778	0.0575504	1	0.807586	1	1	1	1	0.543494	0.744982	0.420898	1	0.327675	1	1	1	0.874182	1	0.396965	0.327296	0.251354	0.875956	0.687135	1	1	0.683178	1	0.084809	1	1	1	1	1	0.313805	1	1	0.646232	1.00044	1.00044	0.181064	0.888516	0.851448	0.680199	0.348078
Cluster_RNAPol	0.318624	1.00418	0.405005	0.97176	1	0.59034	0.75378	0.0831513	0.537752	0.979719	0.548252	0.951718	0.751443	0.0542316	0.38567	0.29387	0.39704	0.413049	1	1	1	0.278078	1	0.235273	0.244937	0.290761	0.785197	0.326136	0.453865	1	0.0266069	1	0.348748	0.0723368	1	1	1	0.776613	0.224433	1.00001	0.869783	0.89617	1.00418	1.00418	0.55876	0.347731	0.55509	0.540479	0.848342
Cluster_ROX1	1	1.00022	0.898724	1	1	0.992721	1	1	1	1	0.143922	1	1	0.652937	0.939488	1	1	0.493475	1	1	1	0.934984	1	0.547714	1	0.501397	0.879277	0.991994	1	1	0.826564	1	0.090892	1	1	1	1	1	0.936766	1	0.29001	0.405178	1.00022	1.00022	1	0.443788	0.922748	1	0.509854
Cluster_RPH1	0.759939	1.00099	0.618354	1	1	0.824275	0.475089	0.713707	0.863009	0.602149	0.503191	0.511594	1	0.289576	0.309842	0.156656	0.545912	0.505612	1	1	1	0.73887	1	0.608343	0.983109	0.210685	0.615215	0.810472	1	1	0.99413	1	0.541282	1	1	1	1	0.494661	0.831553	1	0.425968	0.645815	1.00099	1.00099	0.362093	0.854537	0.696325	0.244302	0.536906
Cluster_RPs	0.79597	1.00663	0.0402012	0.913879	1	0.0308376	0.210398	0.702805	0.186477	0.535445	1.1161e-10	0.991699	0.0634527	0.408855	0.478711	0.78876	0.127238	0.0710215	1	1	0.290397	0.132217	0.572263	0.958575	0.705741	0.0189643	0.181785	0.0856922	0.243986	1	0.0806959	1	0.764914	1	1	1	0.553181	0.447911	0.324589	1.00002	0.927103	0.00498642	1.00663	1.00663	0.0706549	0.931581	0.088937	0.716043	0.838229
Cluster_rRNAprocessing	0.836909	1.0033	0.201048	0.124788	0.227105	0.521728	0.0161766	0.914191	0.588079	0.333382	0.0691404	0.405803	0.293026	0.208589	0.21635	0.928899	0.466857	0.22372	1	1	1	0.364233	0.00827268	0.00193101	0.614376	0.314548	0.129261	0.488948	1	1	0.229125	1	0.418311	1	1	1	0.607504	0.0194105	0.506545	1.00001	0.961434	0.849201	1.0033	1.0033	0.177769	0.832955	0.29883	0.689225	0.0838909
Cluster_RTG1	0.441545	1.00253	0.292465	0.339165	1	0.687248	0.303464	0.876588	0.365157	0.905325	0.521591	0.840034	1	0.486422	0.146163	0.550295	0.121913	0.510689	1	1	1	0.461164	0.277385	0.32614	0.695421	0.473923	0.135986	0.66012	1	1	0.849407	1	0.948004	1	1	1	1	0.233697	0.647503	1	0.141077	0.631825	1.00253	1.00253	0.683296	0.792424	0.771026	0.481144	0.381291
Cluster_RTG3	0.795154	1.0011	0.586176	0.00859138	1	0.409513	0.597951	0.769121	0.983787	0.253419	1	1	1	0.849727	0.785167	0.228826	0.0452251	0.966716	1	1	1	0.714424	1	0.201142	0.843858	0.162203	0.757084	0.391259	1	1	0.944786	1	0.152768	1	1	1	1	0.531587	0.521034	1	0.0581399	0.704799	1.0011	1.0011	0.393192	0.980232	0.668863	0.364955	0.0471681
Cluster_RTS2	1	1.00077	0.688093	0.481033	1	0.535346	0.2102	0.569667	0.439278	1	0.419597	1	1	0.107058	0.764661	0.946044	1	0.90758	1	1	1	0.79029	1	0.164308	0.521426	0.346766	0.538043	0.51853	1	1	0.872593	1	1	1	1	1	1	1	0.753334	1	0.304093	1	1.00077	1.00077	1	0.569551	0.754669	0.934315	0.125795
Cluster_SFL1	1	1.00099	0.618354	0.569762	1	0.447776	0.0168096	0.176789	0.633428	1	0.141614	1	0.28048	0.289576	0.611802	0.368408	0.171054	0.0849826	1	1	1	0.73887	1	0.608343	0.524104	0.210685	0.615215	0.429773	1	1	0.80607	1	0.806825	1	1	1	1	0.494661	0.831553	1	0.156906	0.645815	1.00099	1.00099	0.362093	0.375923	0.696325	0.488011	0.536906
Cluster_SFP1	0.543096	1.00132	0.526747	0.292104	1	0.726625	0.977279	0.169887	0.38079	0.707449	0.00942988	1	0.355298	0.592408	0.0336671	0.390265	1	0.0072562	1	1	1	0.667925	1	0.166019	0.213186	0.517605	0.353356	0.324266	1	0.274548	0.70131	1	0.750985	1	1	1	1	0.216751	0.385899	1	0.289757	0.286531	1.00132	1.00132	0.450924	0.630215	0.617136	0.599614	0.507164
Cluster_SIG1	0.380685	1.00165	0.818357	0.144684	1	0.869408	0.668138	0.0631961	0.39546	1	1	0.320367	0.422358	0.424056	0.699617	0.620172	0.731855	0.24453	1	1	1	0.603772	1	0.362765	0.169336	0.883859	0.761591	0.244636	1	1	0.598783	1	0.282745	1	1	1	1	0.679518	0.681593	1	0.708872	0.889458	1.00165	1.00165	1	0.402423	0.546931	0.936326	0.484133
Cluster_SIP4	0.211593	1.00242	0.308544	0.872956	0.172074	0.428467	0.231218	0.0842966	0.911004	0.159995	0.497509	0.510213	0.185981	0.0273954	0.338772	0.49036	0.855032	0.915665	1	1	0.0578756	0.476967	1	0.0699292	0.164783	0.0789313	0.168661	0.126708	0.295234	0.444982	0.393231	1	0.334397	1	1	1	1	1	0.834522	1	0.695957	0.389462	1.00242	1.00242	0.667041	0.70553	0.412556	0.723276	0.0911238
Cluster_SKN7	1	1.00198	0.382175	0.815056	1	0.537596	0.213909	0.152647	0.603006	0.0905777	0.753358	0.405488	0.482462	0.474326	0.870179	0.909808	1	0.626944	1	1	1	0.545763	1	0.207038	0.26705	0.747442	0.736029	0.511841	1	0.0803719	0.503846	1	0.28305	1	1	1	1	0.382359	0.712388	1	0.311396	0.396156	1.00198	1.00198	0.0543333	0.775624	0.484692	0.390983	0.277758
Cluster_SKO1	0.0644985	1.00121	0.891242	0.643336	1	0.939105	0.472599	0.562965	0.299757	1	0.196406	0.583535	1	0.728938	0.968239	0.931924	0.234534	0.870661	1	1	1	0.690785	1	0.919202	0.296819	0.807322	0.855663	0.741922	1	1	0.736354	1	0.691294	1	1	1	0.0428815	0.565818	0.883074	1	0.848138	0.477346	1.00121	1.00121	1	0.709905	0.64248	0.964944	0.0779647
Cluster_SMP1	0.795154	1.0011	0.586176	1	1	0.409513	0.0478319	0.769121	0.452498	0.640897	0.540365	1	0.306334	0.184838	0.252927	0.461463	1	0.831715	1	1	0.16481	0.714424	1	0.201142	0.843858	0.671168	0.266937	0.391259	1	1	0.385649	1	0.62137	1	1	1	1	0.531587	0.0551024	1	1	0.409876	1.0011	1.0011	1	0.980232	0.668863	0.364955	0.850649
Cluster_SOK2	0.718675	1.00088	0.652294	0.527473	1	0.855498	0.131539	0.906098	0.96301	1	0.115664	1	1	0.985518	0.891698	0.550372	0.504262	0.173281	1	1	1	0.764149	1	0.517319	0.868055	0.820449	0.975657	0.472073	1	1	0.839971	1	0.747816	1	1	1	1	0.454828	0.674822	1	1	0.874914	1.00088	1.00088	1	0.911663	0.724912	0.62607	0.744583
Cluster_sphingolipids	0.718675	1.00088	0.652294	1	1	0.855498	0.341302	0.647509	0.811991	0.0353936	1	0.471096	1	0.190833	0.688439	0.274296	1	0.934243	1	1	1	0.764149	1	1	0.657995	0.063133	0.433769	0.472073	1	0.192592	0.46665	1	0.196786	1	1	1	1	0.454828	0.0984157	1	0.0251455	0.874914	1.00088	1.00088	0.329405	0.911663	0.724912	0.033019	1
Cluster_SRD1	0.133965	1.00209	0.362268	0.23834	0.150456	0.981052	0.292178	0.899195	0.663019	1	0.420842	0.779906	0.147387	0.0434574	0.836	0.830355	0.48205	0.679127	1	1	1	0.871102	0.235336	0.434998	0.706824	0.928169	0.916478	0.977136	1	1	0.474388	1	0.870086	1	1	1	1	0.763476	0.257983	1	0.349799	0.254627	1.00209	1.00209	0.613109	0.853041	0.829116	0.909947	0.953834
Cluster_STB1	1	1.00066	0.725852	1	1	0.585348	0.0137967	0.480004	0.104371	1	1	1	1	0.958234	0.543345	0.107729	1	0.00905533	1	1	1	0.817322	1	0.6372	0.362244	0.125982	0.978439	0.569554	1	1	0.903344	0.0425765	0.883959	1	1	1	1	1	0.995241	1	0.240947	1	1.00066	1.00066	1	0.982082	0.785644	0.33461	0.882312
Cluster_STE12	0.110262	1.00143	0.855784	0.704341	0.105533	0.313229	0.470316	0.435491	0.0372962	1	0.253225	1	1	0.950673	0.597571	0.114731	0.680373	0.310818	1	1	1	0.64582	1	0.226797	0.053271	0.0112145	0.284531	0.295197	1	1	0.66655	1	0.0638195	1	1	1	1	1	0.790296	1	0.630138	0.34472	1.00143	1.00143	0.477701	0.550568	0.592789	0.485711	0.990325
Cluster_Sterols	0.240142	1.00253	0.292465	0.622437	1	0.128101	0.46085	0.557616	0.705469	0.905325	0.244649	1	0.569096	0.896523	0.816455	0.716813	6.82345e-06	0.334637	1	1	1	0.461164	1	0.6688	0.911436	0.154193	0.596098	0.376871	1	1	0.111565	1	0.868055	1	1	1	0.511653	0.825463	0.0110782	1	5.46156e-05	0.806251	1.00253	1.00253	0.683296	0.649669	0.396262	0.0964462	0.731134
Cluster_STP1	0.422839	1.00176	0.425324	0.00183482	0.12828	0.597954	0.0907613	0.205324	0.674342	0.199171	0.711812	1	1	0.702884	0.0108587	0.0187602	0.393661	0.508645	1	1	1	0.583783	1	0.64249	0.796185	0.26834	0.0468969	0.222699	1	0.348216	0.827411	1	0.555507	1	1	1	0.392498	1	0.918396	1	0.742687	0.910135	1.00176	1.00176	0.550463	0.949752	0.525346	0.386487	0.75404
Cluster_STP2	0.907352	1.00165	0.448688	0.754922	0.120762	0.629326	0.830014	0.559849	0.925712	1	0.310354	0.697222	1	0.239362	0.699617	0.808211	1	0.852203	1	1	1	0.913838	1	0.18895	0.985505	0.320868	0.572507	0.960858	1	1	0.598783	1	0.707741	1	1	1	1	1	0.231823	1	0.0731994	0.701761	1.00165	1.00165	1	0.795992	0.546931	0.683005	0.873172
Cluster_SUM1	1	1.00132	0.978389	0.675266	1	0.342506	0.585188	0.369475	0.0707258	1	1	0.615434	1	0.927629	0.165712	0.951686	0.651041	0.718236	1	1	1	0.667925	1	0.166019	0.413907	0.966719	0.0439292	0.70739	1	1	0.70131	1	0.512221	1	1	1	1	1	0.839374	1	0.584917	0.286531	1.00132	1.00132	1	0.391613	0.617136	0.599614	0.507164
Cluster_SWI4	0.603497	1.00308	0.568454	0.463316	1	0.786946	0.00457203	0.759124	0.641249	0.771759	0.886816	0.892672	1	0.777908	0.766128	0.49873	0.914462	0.0359888	1	1	1	0.389643	0.326733	0.0433259	0.965399	0.13089	0.863969	0.271119	1	0.527432	0.525959	0.183959	0.890803	1	1	1	1	0.616652	0.592549	1	0.061508	0.91144	1.00308	1.00308	1	0.999214	0.32393	0.159167	0.190599
Cluster_SWI5	0.503735	1.00198	0.382175	0.815056	1	0.805329	0.558694	0.714203	0.235165	0.00555405	0.753358	1	1	0.0253697	0.31916	0.244601	1	0.926876	1	1	0.276978	0.545763	0.22445	0.207038	0.440191	0.0687675	0.363231	0.184544	1	0.382206	0.179805	1	0.672645	0.0349046	1	1	0.429226	0.744811	0.300351	1	0.800282	0.941073	1.00198	1.00198	1	0.229537	0.484692	0.390983	0.0208025
Cluster_SWI6	0.629945	1.00154	0.837266	0.360172	1	0.888807	0.0778695	0.984097	0.749924	0.761678	0.663278	1	0.400815	0.547661	0.964859	0.758067	0.331074	0.190673	1	1	1	0.923712	1	0.505587	0.994755	0.610703	0.994343	0.876114	0.199532	1	0.993903	0.0965792	0.842302	1	1	1	1	0.654239	0.885831	1	0.0144606	0.973726	1.00154	1.00154	1	0.849797	0.569399	0.0838121	0.0929426
Cluster_TFs	0.388567	1.00099	0.923815	0.189162	1	0.447776	0.234272	0.415816	0.360267	1	1	0.511594	1	0.289576	0.611802	0.641354	0.171054	0.243919	1	1	1	0.73887	1	0.608343	0.524104	0.210685	0.615215	0.429773	1	1	0.424223	1	0.806825	1	1	1	1	0.494661	0.989724	1	1	0.645815	1.00099	1.00099	1	0.649186	0.696325	0.488011	0.803919
Cluster_THI2	0.0859007	1.00132	0.526747	0.675266	1	0.985043	0.916849	0.627462	0.82713	0.707449	1	0.615434	1	0.592408	0.987032	0.390265	0.0731724	0.471127	1	1	0.194376	0.667925	1	0.59007	0.824694	0.517605	0.999212	0.997364	1	1	0.70131	1	0.750985	1	1	1	0.311828	1	0.155428	1	0.584917	0.955794	1.00132	1.00132	0.450924	0.391613	0.617136	0.374008	0.747067
Cluster_Thiamine	1	1.00033	0.851993	1	1	0.765116	0.484815	0.588021	1	1	1	1	1	0.367688	0.848221	1	1	0.639527	1	1	1	0.904074	1	1	0.882244	0.975151	0.721696	0.754725	1	1	0.751463	1	1	1	1	1	1	0.203422	0.842084	1	1	0.541267	1.00033	1.00033	1	0.740132	0.886383	1	0.656871
Cluster_tRNAprocessing	0.148767	1.00275	0.624017	0.668166	1	0.357762	0.307933	0.805374	0.190158	1	0.567378	0.863632	0.599555	0.618639	0.395644	0.333469	0.351027	0.0327794	1	1	1	0.431107	0.0473606	0.0812923	0.690897	0.10496	0.640527	0.331153	1	1	0.929415	1	0.193814	1	1	1	0.541199	0.27403	0.093113	1	0.356685	0.194271	1.00275	1.00275	0.34572	0.219718	0.365575	0.480357	0.487669
Cluster_tRNAsynth	0.475925	1.00264	0.277223	1	1	0.380254	0.130937	0.000145312	0.423164	0.692923	0.845423	0.852303	1	0.7106	0.260501	0.436724	0.327273	0.984119	1	1	1	0.445883	1	0.0594818	0.00433531	0.0501896	0.21769	0.104985	1	0.473944	0.101405	1	0.0763835	1	1	1	1	0.531677	0.415295	1	0.535761	0.48012	1.00264	1.00264	1	0.421712	0.38061	0.917416	0.771139
Cluster_Tryptophan	0.133455	1.00099	0.618354	0.569762	1	0.447776	0.725868	0.0112379	0.151433	0.602149	0.503191	0.511594	1	0.788206	0.309842	0.368408	0.545912	0.78246	1	1	1	0.73887	0.119291	0.0388477	0.0997569	0.0446889	0.615215	0.429773	1	0.213907	0.424223	1	0.100576	1	1	1	1	0.494661	0.296605	1	0.156906	0.00625023	1.00099	1.00099	1	0.375923	0.696325	0.244302	0.26999
Cluster_UGA3	0.463959	1.00187	0.403174	0.190021	1	0.219074	0.284938	0.955128	0.731332	0.503114	0.366529	0.741849	1	0.588494	0.172656	0.740652	0.0485648	0.0312873	1	1	1	0.564454	1	0.307088	0.532697	0.0878415	0.0341424	0.202727	1	0.365438	0.197808	1	0.228886	1	1	1	1	0.724674	0.890285	1	0.773077	0.927141	1.00187	1.00187	0.572396	0.827255	0.504611	0.82376	0.980759
Cluster_USV1	0.629945	1.00154	0.473333	0.360172	1	0.661337	0.966106	0.499359	0.322627	0.14906	0.663278	0.672098	0.400815	0.993499	0.753215	0.905066	0.331074	0.6083	1	1	1	0.624443	1	0.0153431	0.633258	0.380216	0.64814	0.639249	1	0.0511811	0.263351	1	0.420764	1	1	1	0.353415	1	0.737221	1	0.909214	0.864432	1.00154	1.00154	0.503175	0.473917	0.569399	0.590458	0.99323
Cluster_Vacuole	0.684644	1.00507	0.0852634	0.394192	1	0.235316	0.815048	0.988163	0.620409	0.287781	1	0.876972	0.814724	0.65998	0.0906426	0.0370438	0.342661	0.33616	1	1	1	0.21225	1	0.320504	0.717924	0.94731	0.138946	0.0733782	0.519322	0.708489	0.198648	1	0.122352	1	1	1	0.761955	0.115829	0.245126	1.00001	0.752275	0.629645	1.00507	1.00507	0.0714978	0.0126218	0.15665	0.646622	0.189984
Node 1	0.158422	1.00055	0.975714	0.374032	1	0.938835	0.799658	0.0170206	1	1	1	1	1	0.336331	0.641183	0.221192	0.354991	0.147864	1	1	1	0.989808	1	0.201197	0.199916	0.847541	0.768769	0.933309	1	1	0.931525	1	1	1	1	1	1	0.315519	0.984045	1	1	1	1.00055	1.00055	1	0.954543	0.985696	0.806421	0.471555
Node 10	0.331876	1.00088	0.652294	1	1	0.48961	0.614411	0.33614	0.0923297	1	0.463016	1	1	0.431212	0.376944	0.550372	1	0.418381	1	1	1	0.764149	1	0.958208	0.657995	0.572409	0.711832	0.472073	1	1	0.46665	1	0.747816	1	1	1	1	1	0.884186	1	1	0.577833	1.00088	1.00088	1	0.467011	0.724912	0.62607	0.744583
Node 11	1	1.00033	0.992188	1	1	0.979403	0.484815	0.588021	1	1	1	1	1	1	0.848221	1	1	1	1	1	1	0.904074	1	1	0.882244	0.794167	0.721696	0.754725	1	1	0.976766	1	0.217892	1	1	1	1	0.203422	0.842084	1	1	1	1.00033	1.00033	1	0.740132	0.995477	0.492694	0.656871
Node 12	1	1.00033	0.851993	0.0225342	1	0.765116	0.11752	0.162889	0.264994	1	1	1	1	0.367688	0.848221	1	1	1	1	1	1	0.904074	1	1	0.514693	0.355012	0.721696	0.754725	1	1	0.976766	1	0.217892	1	1	1	1	1	0.419294	1	0.401774	1	1.00033	1.00033	1	0.295616	0.886383	0.121342	0.215821
Node 13	0.718675	1.00088	0.938685	1	1	0.48961	0.614411	0.647509	0.542374	0.559225	0.463016	1	1	0.0567927	0.376944	0.81718	0.504262	0.0492503	1	1	1	0.764149	1	0.795232	0.384857	0.572409	0.433769	0.843734	1	0.192592	0.46665	1	1	1	1	1	0.220489	1	0.884186	1	0.746022	0.577833	1.00088	1.00088	0.329405	0.467011	0.724912	0.62607	0.744583
Node 14	0.503735	1.00198	0.760151	0.48749	0.0100751	0.805329	0.732021	0.714203	0.90507	0.534435	0.393963	0.761635	1	0.0253697	0.31916	0.614394	0.0584397	0.241486	1	1	0.00373501	0.545763	1	0.889122	0.785268	0.949464	0.1944	0.511841	1	0.382206	0.179805	1	0.672645	1	1	1	0.429226	0.139653	0.300351	1	0.555435	0.0948546	1.00198	1.00198	1	0.985484	0.484692	0.872814	0.465189
Node 15	0.210694	1.00121	0.55567	1	0.0900439	0.759486	0.472599	0.814934	0.928986	0.291118	1	1	1	0.270882	0.467474	0.781961	1	0.656459	1	1	0.179725	0.690785	1	0.274327	0.526514	0.593366	0.432465	0.741922	1	0.0325727	0.350578	0.0766892	0.889166	1	1	1	0.290046	0.189271	0.450462	1	0.243826	0.477346	1.00121	1.00121	0.422778	0.709905	0.64248	0.880461	0.209919
Node 16	1	1.00022	0.997303	1	1	0.992721	0.739801	1	0.561301	1	1	1	1	1	0.939488	0.56564	1	1	1	1	1	0.998911	1	0.547714	0.759727	0.914823	1	0.991994	1	1	0.991757	1	0.512151	1	1	1	1	1	0.936766	1	1	1	1.00022	1.00022	1	0.888597	0.998452	0.745133	0.509854
Node 17	1	1.00022	0.898724	0.170847	1	0.992721	1	1	1	0.185136	1	0.147159	1	0.168777	0.939488	0.56564	1	1	1	1	1	0.934984	1	0.107206	1	0.501397	0.879277	0.828954	1	0.0520596	0.826564	1	1	1	1	1	1	1	0.560224	1	0.29001	0.405178	1.00022	1.00022	0.0950392	0.443788	0.922748	1	0.509854
Node 18
Node 19	1	1.00011	0.948014	1	1	0.914633	0.489876	1	0.337638	1	1	1	1	1	0.753967	0.340922	1	1	1	1	1	0.966948	1	1	1	0.70811	0.652512	0.910474	1	1	0.909161	1	1	1	1	1	1	0.0729999	0.748495	1	1	1	1.00011	1.00011	1	0.666192	0.9606	0.49513	1
Node 2	0.240142	1.00253	0.292465	1	0.179159	0.403821	0.303464	0.557616	0.536974	0.669994	2.17437e-05	1	0.199148	0.652056	0.486096	0.550295	0.0388466	0.999603	1	1	1	0.461164	1	0.32614	0.374035	0.154193	0.749381	0.66012	1	1	0.368631	0.0117907	0.0221864	1	1	1	1	0.825463	0.277363	1	0.141077	0.0594762	1.00253	1.00253	0.000641027	0.167966	0.396262	0.481144	0.984361
Node 2_fuzzy0.06	0.178747	1.00352	0.180622	1	0.240288	0.228832	0.0874765	0.0927218	0.537232	0.832339	1.13097e-05	0.922019	0.319807	0.829358	0.294961	0.272217	0.0473159	0.998233	1	1	1	0.340476	1	0.636581	0.129276	0.0235157	0.563449	0.4443	1	1	0.198767	0.0221736	0.0717319	0.0612536	1	1	1	0.416922	0.148094	1.00001	0.22978	0.0442509	1.00352	1.00352	0.00011108	0.11383	0.27567	0.0973758	0.981212
Node 20	1	1.00011	0.948014	1	1	0.914633	0.489876	1	0.337638	1	1	1	1	1	0.753967	0.340922	1	1	1	1	1	0.966948	1	1	1	1	0.652512	0.910474	1	1	0.909161	1	1	1	1	1	1	1	0.748495	1	1	1	1.00011	1.00011	1	0.666192	0.9606	1	0.29988
Node 21	1	1.00022	0.898724	1	1	0.836545	0.739801	1	0.561301	1	1	1	1	0.652937	0.568447	0.56564	0.160851	0.493475	1	1	1	0.934984	1	1	1	0.914823	0.425747	0.828954	1	1	0.826564	1	1	1	1	1	1	1	0.560224	1	1	1	1.00022	1.00022	1	0.443788	0.922748	1	0.0899048
Node 22	1	1.00011	0.948014	1	1	0.914633	1	1	1	1	1	1	1	1	0.753967	1	0.0839444	1	1	1	1	0.966948	1	0.32746	1	0.70811	0.652512	0.910474	1	1	0.909161	1	1	1	1	1	1	1	1	1	1	1	1.00011	1.00011	1	1	0.9606	0.49513	1
Node 23
Node 24
Node 25	1	1.00011	0.948014	1	1	0.914633	1	1	1	1	1	0.0765021	1	1	1	1	1	1	1	1	1	0.966948	1	1	1	0.70811	1	0.910474	1	1	0.909161	1	1	1	1	1	1	0.0729999	1	1	1	1	1.00011	1.00011	1	0.666192	0.9606	0.49513	0.29988
Node 26
Node 27	1	1.00022	0.898724	0.170847	1	0.836545	0.239951	1	0.561301	1	1	1	1	0.652937	0.568447	1	1	1	1	1	1	0.934984	1	0.107206	0.759727	0.914823	0.425747	0.828954	1	1	0.826564	1	0.512151	1	0.00349937	1	1	0.140678	0.560224	1	1	1	1.00022	1.00022	1	0.443788	0.922748	0.745133	0.509854
Node 28
Node 29
Node 3	0.158422	1.00055	0.765679	0.0665436	1	0.938835	0.175033	0.771943	0.0473818	1	1	0.328355	1	0.929079	0.243561	0.875709	1	0.447549	1	1	1	0.845276	1	0.527476	0.824573	0.544953	0.118219	0.625591	1	1	0.931525	1	0.833827	1	1	1	1	1	0.234847	1	0.575317	0.322407	1.00055	1.00055	1	0.954543	0.817886	0.490867	0.831864
Node 30	1	1.00022	0.898724	1	1	0.836545	0.739801	1	1	1	0.143922	1	1	1	0.568447	0.56564	1	1	1	1	1	0.934984	1	0.547714	1	0.501397	0.879277	0.828954	1	1	0.826564	1	0.512151	1	1	1	1	1	0.936766	1	1	1	1.00022	1.00022	1	0.888597	0.922748	0.245126	1
Node 31	0.76422	1.00198	0.382175	0.213887	1	0.200338	0.102373	0.714203	0.780688	0.252549	0.393963	1	0.482462	0.0253697	0.0424696	0.614394	0.793972	0.807877	1	1	1	0.545763	1	0.566944	0.625203	0.564802	0.0812799	0.184544	1	1	0.503846	1	0.143771	1	1	1	0.00188029	0.382359	0.132006	1	0.555435	0.990722	1.00198	1.00198	0.59326	0.606897	0.484692	0.390983	0.465189
Node 32	0.0909908	1.00187	0.403174	0.45709	1	0.219074	0.284938	0.25283	0.181765	0.824786	1	0.377611	0.122718	0.225813	0.367	0.189697	0.166443	0.361592	1	1	1	0.564454	1	0.701216	0.344002	0.417107	0.627306	0.202727	1	0.365438	0.534446	1	0.616728	1	1	1	0.411147	0.724674	0.760843	1	0.273422	0.987964	1.00187	1.00187	0.199548	0.827255	0.504611	0.82376	0.224263
Node 33	0.378395	1.00033	0.851993	0.245003	1	0.765116	0.484815	0.588021	0.709455	0.264437	0.207929	0.212418	1	0.367688	0.42856	0.713755	1	0.20137	1	1	1	0.904074	1	0.695852	0.514693	0.355012	0.277772	0.754725	1	0.0770683	0.751463	1	0.65928	1	1	1	1	1	0.842084	1	0.401774	0.541267	1.00033	1.00033	1	0.740132	0.886383	0.871353	0.215821
Node 34
Node 35	0.527838	1.00741	0.027592	0.391989	1	0.0180796	0.0817129	0.45132	0.0119832	0.00447475	0.56848	0.895878	0.914433	0.401672	0.291877	0.631057	0.33053	0.58009	1	1	0.701939	0.104324	0.612753	0.878255	0.657814	0.0833025	0.425223	0.00182195	0.656384	0.00824985	0.259797	1	0.358736	1	0.111175	1	0.876683	0.363973	0.358947	1.00003	0.361139	0.981945	1.00741	1.00741	0.22677	0.0340242	0.0669906	0.000184714	0.752987
Node 36
Node 37	1	1.00044	0.807686	0.312535	1	0.699778	0.0575504	0.271662	1	1	1	0.272689	1	0.543494	0.323085	0.420898	1	0.743478	1	1	1	0.874182	1	0.795481	0.0675008	0.251354	0.181218	0.687135	1	1	0.683178	1	0.350975	1	1	1	1	0.0289148	0.735762	1	0.495955	1	1.00044	1.00044	0.181064	0.888516	0.851448	0.305189	0.759802
Node 38	1	1.00022	0.898724	1	1	0.836545	0.739801	1	0.561301	1	1	1	1	1	0.568447	0.56564	0.160851	0.493475	1	1	1	0.934984	1	0.547714	0.259864	0.501397	0.425747	0.828954	1	1	0.826564	1	1	1	1	1	1	1	0.936766	1	1	1	1.00022	1.00022	1	0.443788	0.922748	0.745133	0.509854
Node 39	0.108816	1.00253	0.662278	1	1	0.403821	0.769131	0.738382	0.976099	0.390584	0.521591	0.534453	0.199148	0.794494	0.297848	0.0224843	0.586662	0.510689	0.0682364	1	1	0.96117	1	0.32614	0.695421	0.954833	0.749381	0.66012	1	0.459656	0.651539	0.0117907	0.0562427	1	1	1	1	0.233697	0.647503	1	0.141077	0.806251	1.00253	1.00253	0.000641027	0.30807	0.771026	0.886483	0.984361
Node 4
Node 40	1	1.00033	0.851993	0.245003	1	0.765116	0.11752	0.588021	0.709455	1	1	1	1	0.795561	0.985122	0.713755	0.231308	0.20137	1	1	1	0.904074	1	0.695852	0.882244	0.355012	1	0.977412	1	1	0.976766	1	0.65928	1	1	1	1	1	0.984107	1	0.401774	1	1.00033	1.00033	1	0.740132	0.886383	0.492694	0.656871
Node 41
Node 42	1	1.00022	0.898724	1	1	0.836545	0.739801	1	1	1	0.143922	1	1	0.168777	0.939488	0.56564	1	1	1	1	1	0.934984	1	0.107206	1	0.914823	1	0.828954	1	1	0.826564	1	1	1	1	1	1	0.140678	0.560224	1	1	1	1.00022	1.00022	1	0.443788	0.922748	0.745133	1
Node 43	1	1.00022	0.898724	1	1	0.836545	0.739801	0.44631	1	1	0.143922	1	1	0.652937	0.568447	0.56564	1	1	1	1	1	0.934984	1	0.547714	0.759727	1	0.879277	0.828954	1	1	0.991757	1	1	1	1	1	1	0.140678	0.560224	1	0.29001	1	1.00022	1.00022	1	0.443788	0.922748	0.745133	1
Node 44	0.914648	1.00396	0.145773	0.215617	0.265993	0.396055	0.00130926	0.737596	0.904403	0.0200377	0.0485475	0.0533202	0.732509	0.868702	0.308228	0.958036	0.592139	0.331986	1	1	0.477577	0.297495	1	0.880986	0.612258	0.364261	0.243605	0.154578	0.109869	1	0.148583	1	0.891768	1	1	1	0.674584	0.11853	0.580134	1.00001	0.840274	0.100266	1.00396	1.00396	1	0.0210148	0.234584	0.185875	0.992946
Node 45
Node 46	1	1.00011	0.948014	1	1	0.914633	0.489876	0.255883	0.337638	1	1	1	1	1	1	1	1	0.288278	1	1	1	0.966948	1	0.32746	0.509795	1	1	0.910474	1	1	0.909161	1	1	1	1	1	1	1	0.748495	1	1	1	1.00011	1.00011	1	0.666192	0.9606	1	1
Node 47
Node 48	1	1.00022	0.898724	1	1	0.836545	0.239951	1	0.561301	1	1	0.147159	1	0.168777	0.568447	1	1	1	1	1	1	0.934984	1	0.547714	0.759727	0.914823	0.425747	0.828954	1	1	0.826564	1	0.512151	1	1	1	0.0603534	1	0.560224	1	1	1	1.00022	1.00022	1	0.888597	0.922748	0.245126	0.509854
Node 49
Node 5	0.378395	1.00033	0.851993	1	1	0.979403	0.867294	0.588021	0.709455	1	1	1	1	0.367688	0.848221	0.713755	0.231308	0.639527	1	1	0.0525752	0.904074	1	1	0.13245	0.355012	0.721696	0.754725	1	1	0.976766	1	0.65928	1	1	1	1	1	0.419294	1	1	0.541267	1.00033	1.00033	1	0.740132	0.886383	0.871353	0.656871
Node 50
Node 51	1	1.00022	0.898724	1	1	0.836545	0.239951	1	1	1	1	0.147159	1	1	0.568447	0.56564	1	1	1	1	1	0.934984	1	0.547714	0.759727	0.914823	0.879277	0.828954	1	1	0.826564	1	0.090892	1	1	1	1	1	0.560224	1	1	0.405178	1.00022	1.00022	1	0.443788	0.922748	0.245126	0.509854
Node 52	1	1.00011	0.948014	1	1	0.914633	0.489876	1	1	1	1	1	1	0.410857	0.753967	1	1	1	1	1	1	0.966948	1	1	1	1	0.652512	0.910474	1	1	0.909161	1	1	1	1	1	1	1	0.748495	1	1	0.22874	1.00011	1.00011	1	1	0.9606	1	1
Node 53	1	1.00011	0.948014	0.0894167	1	0.914633	0.489876	0.255883	0.337638	1	0.074751	1	1	1	0.753967	0.340922	0.0839444	1	1	1	1	0.966948	1	1	0.509795	1	0.652512	0.910474	1	1	0.909161	1	1	1	1	1	1	1	1	1	1	1	1.00011	1.00011	0.0487031	1	0.9606	0.49513	1
Node 54
Node 55	1	1.00022	0.898724	1	1	0.836545	0.239951	1	0.113975	1	1	1	1	0.652937	0.568447	1	1	0.493475	1	1	1	0.934984	1	1	1	0.501397	0.425747	0.828954	1	1	0.826564	1	0.512151	1	1	1	1	1	0.936766	1	0.29001	1	1.00022	1.00022	1	0.888597	0.922748	0.245126	1
Node 56	1	1.00022	0.898724	1	1	0.836545	0.239951	1	0.113975	1	1	1	1	0.652937	0.568447	1	1	0.493475	1	1	1	0.934984	1	1	1	0.501397	0.425747	0.828954	1	1	0.826564	1	0.512151	1	1	1	1	1	0.936766	1	0.29001	1	1.00022	1.00022	1	0.888597	0.922748	0.245126	1
Node 57	0.378395	1.00033	0.851993	1	1	0.765116	0.484815	0.588021	0.0384658	1	1	1	1	1	0.848221	0.26941	1	0.20137	1	1	1	0.904074	1	0.695852	0.13245	0.355012	0.958067	0.754725	1	1	0.751463	1	0.65928	1	1	1	1	1	0.419294	1	1	1	1.00033	1.00033	1	0.962829	0.886383	0.492694	0.656871
Node 58	0.547294	1.00055	0.765679	1	1	0.938835	0.175033	0.771943	0.216242	1	0.321961	1	1	0.929079	0.641183	0.221192	1	0.447549	1	1	1	0.845276	1	0.862482	0.971726	0.544953	0.768769	0.625591	1	1	0.621091	0.0356066	1	1	1	1	1	1	0.629637	1	0.575317	1	1.00055	1.00055	0.220967	0.131148	0.817886	1	0.0306973
Node 59	1	1.00055	0.765679	1	1	0.994565	0.175033	0.771943	0.547608	1	0.321961	1	1	0.681602	0.900682	0.221192	1	0.447549	1	1	1	0.845276	1	0.201197	0.971726	0.847541	0.994944	0.625591	1	1	0.621091	0.0356066	0.833827	1	1	1	1	1	0.234847	1	0.178505	0.727189	1.00055	1.00055	1	0.459933	0.817886	0.967233	0.471555
Node 6	1	1.00077	0.688093	1	1	0.535346	0.2102	0.873775	0.744587	1	1	0.427245	0.225853	0.603566	0.933121	0.750478	0.458796	0.90758	1	1	0.118426	0.79029	1	0.937836	0.789283	0.346766	0.804356	0.51853	1	1	0.513315	1	0.673888	1	1	1	1	0.411861	0.441135	1	1	0.837779	1.00077	1.00077	1	0.0581698	0.754669	0.21856	0.125795
Node 60	1	1.00011	0.948014	1	1	0.914633	0.489876	1	0.337638	1	1	1	1	1	0.753967	0.340922	1	1	1	1	1	0.966948	1	1	0.509795	0.70811	1	0.910474	1	1	0.909161	1	1	1	1	1	1	1	0.748495	1	1	1	1.00011	1.00011	1	0.666192	0.9606	0.49513	1
Node 61	1	1.00033	0.851993	1	1	0.765116	0.11752	0.588021	1	1	1	1	1	0.367688	0.42856	0.26941	1	0.20137	1	1	1	0.904074	1	1	0.882244	0.355012	0.277772	0.754725	1	1	0.751463	0.0215163	1	1	1	1	1	1	0.419294	1	1	0.541267	1.00033	1.00033	1	0.962829	0.886383	0.492694	0.656871
Node 62	0.378395	1.00033	0.851993	1	1	0.765116	0.11752	1	1	1	0.207929	0.212418	1	0.795561	0.42856	0.26941	0.231308	0.639527	1	1	1	0.904074	1	0.251438	0.882244	0.355012	0.721696	0.754725	1	1	0.976766	1	0.65928	1	1	1	1	0.203422	0.419294	1	0.401774	1	1.00033	1.00033	1	0.740132	0.886383	1	0.656871
Node 63	0.613673	1.00066	0.725852	1	1	0.585348	0.100095	0.830331	0.104371	0.10893	1	0.379765	1	0.783309	0.543345	0.663726	1	0.554204	1	1	1	0.817322	1	0.6372	0.674487	0.759236	0.323731	0.569554	1	1	0.564641	0.0425765	0.583166	1	1	1	1	0.0655468	0.530335	1	0.642191	0.789626	1.00066	1.00066	0.258929	0.679483	0.785644	0.1048	0.579624
Node 64
Node 65	1	1.00044	0.807686	1	1	0.699778	0.297428	0.693474	0.415061	1	1	1	1	0.879584	0.323085	0.420898	0.295856	0.327675	1	1	1	0.874182	1	0.795481	0.942295	0.665988	0.181218	0.687135	1	1	0.683178	1	0.762048	1	1	1	1	0.261592	0.313805	1	1	1	1.00044	1.00044	1	0.591749	0.851448	0.935071	1
Node 66	1	1.00011	0.948014	1	1	0.914633	1	1	0.337638	1	1	1	1	0.410857	0.753967	1	1	1	1	1	1	0.966948	1	1	1	0.70811	0.652512	0.910474	1	1	0.909161	1	0.301521	1	1	1	1	1	0.748495	1	1	1	1.00011	1.00011	1	1	0.9606	1	1
Node 67	0.899583	1.00275	0.624017	0.668166	1	0.107111	0.307933	0.972296	0.320691	0.221383	0.286232	0.863632	1	0.0437108	0.226715	0.494805	0.351027	0.956904	1	1	1	0.431107	1	0.282202	0.539462	0.218024	0.477323	0.331153	0.328114	0.487856	0.323066	1	0.665664	1	1	1	1	0.27403	0.093113	1	0.0328579	0.341283	1.00275	1.00275	1	0.907644	0.365575	0.197898	0.0972628
Node 68	0.406518	1.00242	0.308544	0.0412696	0.172074	0.140089	0.834446	0.699085	0.654188	0.645698	0.224232	0.826748	1	0.260989	0.71487	0.182737	1	0.915665	1	1	0.327312	0.476967	0.267093	0.615966	0.620077	0.343216	0.955298	0.401501	0.295234	1	0.393231	0.147579	0.839506	1	1	1	1	0.811683	0.0586223	1	0.463791	0.589063	1.00242	1.00242	1	0.0951078	0.412556	0.566073	0.0911238
Node 69	1	1.00022	0.898724	1	1	0.836545	1	1	1	1	1	1	1	0.652937	0.568447	1	1	0.493475	1	1	1	0.934984	1	1	0.759727	0.501397	0.425747	0.828954	1	1	0.826564	1	1	1	1	1	1	0.140678	0.936766	1	1	0.405178	1.00022	1.00022	1	0.888597	0.922748	1	0.509854
Node 7	0.308051	1.01271	0.0160425	0.948901	1	0.067928	0.000803555	0.087819	0.0378674	0.0264446	0.483036	0.511556	0.389583	0.671151	0.0270948	0.0659512	0.49085	0.755621	0.0472459	0.0725831	0.873179	0.0211534	1	0.880164	0.0817349	0.114218	0.00699698	0.187932	1	0.0104147	0.848859	0.199008	0.484336	0.202446	1	1	0.68398	0.319992	0.00270365	1.00008	0.334606	0.959517	1.01271	1.01271	0.00353774	0.000603639	0.0569968	0.000147288	0.468971
Node 70	1	1.00011	0.948014	1	1	0.914633	0.489876	1	1	1	1	1	1	0.410857	0.753967	1	1	0.288278	1	1	1	0.966948	1	1	0.509795	0.70811	0.652512	0.910474	1	1	0.909161	1	1	1	1	1	1	1	0.748495	1	1	1	1.00011	1.00011	1	0.666192	0.9606	1	1
Node 71	1	1.00033	0.851993	1	1	0.765116	0.11752	1	0.709455	1	1	1	0.103885	0.795561	0.985122	1	0.0199359	0.20137	1	1	1	0.904074	1	0.251438	1	0.794167	0.958067	0.754725	1	1	0.751463	1	0.217892	1	1	1	0.0891548	1	0.419294	1	1	1	1.00033	1.00033	1	0.295616	0.886383	0.871353	1
Node 72	0.188205	1.0181	0.00857188	0.584889	0.400993	0.0128279	0.112437	0.333141	0.682199	0.92308	0.000354658	0.46188	0.521787	0.193226	8.40285e-05	0.328212	0.0488479	0.489117	1	1	0.551192	0.00425297	0.663458	0.163624	0.473394	0.0665781	0.00244544	0.00815397	0.468013	0.986993	0.0372694	1	0.244781	1	1	1	0.875872	0.127858	0.0689126	1.00016	0.64832	0.187171	1.0181	1.0181	0.674762	0.948642	0.00145856	0.0303385	0.230476
Node 73	0.99606	1.04137	0.000482455	0.440374	0.361666	0.013521	0.000814485	0.148974	0.438702	0.97219	0.000318276	0.998792	0.297744	0.00752431	0.00491618	0.965916	0.367927	0.0303086	1	1	0.767172	6.82365e-05	2.4367e-12	2.1533e-18	0.293972	0.0131399	0.000835996	0.00175997	0.92389	0.999329	0.00274431	0.928103	0.233046	0.153998	1	1	0.409441	0.29398	0.452383	1.0008	0.792643	0.255111	1.04137	1.04137	0.37315	0.940478	7.3883e-06	0.489852	0.730962
Node 74	1	1.00044	0.807686	1	1	0.699778	0.672202	0.693474	0.415061	1	1	0.272689	1	0.879584	0.951459	0.811374	1	0.327675	1	1	1	0.874182	1	0.105911	0.327296	0.922346	0.875956	0.957494	1	1	0.683178	1	0.350975	1	1	1	1	0.261592	0.735762	1	1	0.646232	1.00044	1.00044	0.181064	0.591749	0.851448	0.305189	0.0835635
Node 75	1	1.00022	0.898724	1	1	0.836545	0.739801	0.44631	1	1	1	1	1	1	0.568447	0.116203	0.160851	1	1	1	1	0.934984	1	0.547714	0.759727	0.501397	0.425747	0.828954	1	1	0.826564	1	0.512151	1	1	1	1	1	0.560224	1	1	0.405178	1.00022	1.00022	1	0.443788	0.922748	0.745133	0.509854
Node 76	1	1.00055	0.765679	1	1	0.640014	0.481019	0.379597	0.216242	0.400659	0.321961	0.328355	1	0.336331	0.641183	0.875709	1	0.447549	1	1	1	0.845276	1	0.527476	0.518366	0.177954	0.768769	0.625591	1	1	0.621091	1	0.833827	1	1	1	1	0.315519	0.629637	1	0.178505	0.727189	1.00055	1.00055	1	0.459933	0.817886	0.967233	0.471555
Node 77	1	1.00011	0.948014	1	1	0.914633	1	0.255883	1	1	1	1	1	0.410857	0.753967	1	1	1	1	1	1	0.966948	1	0.32746	0.509795	0.70811	0.652512	0.910474	1	1	0.909161	1	1	1	1	1	1	1	0.748495	1	1	1	1.00011	1.00011	1	1	0.9606	1	1
Node 78	1	1.00022	0.997303	1	1	0.836545	1	1	0.561301	1	0.143922	1	1	0.168777	0.939488	0.56564	1	1	1	1	1	0.934984	1	1	0.759727	0.914823	0.879277	0.991994	1	1	0.826564	1	0.512151	1	1	1	1	0.140678	0.560224	1	0.0247546	1	1.00022	1.00022	1	1	0.922748	1	1
Node 79
Node 8	0.0677425	1.00452	0.111494	0.978705	1	0.307863	0.0831871	0.0786892	0.00674407	0.204373	0.00983471	0.201569	0.0583134	0.539909	0.811754	0.303284	0.680816	0.668406	0.00689769	1	1	0.251295	1	0.614351	0.426224	0.809957	0.857179	0.107028	1	0.294592	0.48158	1	0.142726	0.077832	1	1	0.721665	0.176549	0.395698	1.00001	0.79524	0.328141	1.00452	1.00452	0.0136271	0.14447	0.51557	0.474927	0.463116
Node 80	0.759939	1.00099	0.618354	0.0397243	1	0.447776	0.725868	0.000126749	0.360267	1	1	0.0264134	1	0.289576	0.0786347	0.368408	1	0.505612	1	1	1	0.73887	1	0.971905	0.00231695	0.484581	0.124096	0.429773	0.133275	1	0.424223	1	0.273754	1	1	1	1	1	0.596457	1	1	0.339899	1.00099	1.00099	1	0.649186	0.696325	0.244302	0.26999
Node 81	0.547294	1.00055	0.765679	0.0665436	1	0.640014	0.481019	0.00109351	0.872581	1	0.0479369	0.0500286	1	0.0955835	0.243561	0.00459571	1	0.147864	1	1	1	0.845276	1	1	0.0343971	0.544953	0.118219	0.625591	0.0763717	1	0.621091	1	0.474932	1	1	1	1	1	0.234847	1	1	0.322407	1.00055	1.00055	1	0.459933	0.817886	0.806421	0.831864
Node 82	0.670325	1.00077	0.688093	1	1	0.535346	0.0560527	0.873775	0.179891	1	0.419597	1	0.225853	0.603566	0.764661	0.946044	0.458796	0.326468	1	1	1	0.79029	1	0.164308	0.242858	0.665424	0.804356	0.51853	1	1	0.98022	1	0.918971	1	1	1	1	1	0.928122	1	0.304093	0.50071	1.00077	1.00077	1	0.569551	0.971493	0.934315	0.67042
Node 83	1	1.00011	0.948014	1	1	0.914633	0.489876	1	0.337638	1	1	1	1	0.410857	0.753967	0.340922	1	1	1	1	1	0.966948	1	1	1	0.70811	0.652512	0.910474	1	1	0.909161	1	1	1	1	1	1	1	0.748495	1	1	0.22874	1.00011	1.00011	1	0.666192	0.9606	1	1
Node 84	0.271632	1.00022	0.898724	0.170847	1	0.836545	0.239951	1	0.561301	1	1	1	1	0.652937	0.568447	0.56564	1	0.493475	1	1	1	0.934984	1	1	0.759727	0.501397	0.425747	0.828954	1	1	0.826564	1	1	1	1	1	1	1	0.560224	1	0.0247546	0.405178	1.00022	1.00022	1	0.888597	0.922748	0.245126	0.509854
Node 85	0.872738	1.00143	0.499328	0.326368	1	0.313229	0.11799	0.978617	0.109727	1	0.253225	0.0716054	1	0.457749	0.925144	0.114731	0.299061	0.988018	1	1	1	0.64582	1	0.429748	0.881535	0.0112145	0.955815	0.673087	1	1	0.289706	1	0.937855	1	1	1	1	1	0.124067	1	0.892228	0.834296	1.00143	1.00143	1	0.320967	0.592789	0.85895	0.579121
Node 86
Node 87	0.469519	1.00044	0.807686	0.312535	1	0.699778	0.672202	1	0.114926	1	0.267156	1	1	0.191882	0.951459	0.420898	1	0.743478	1	1	1	0.874182	1	0.396965	0.327296	0.665988	0.985438	0.687135	1	1	0.683178	1	1	1	1	1	1	1	0.313805	1	0.495955	0.226372	1.00044	1.00044	1	0.9876	0.851448	0.935071	0.348078
Node 88	1	1.00022	0.898724	1	1	0.836545	0.239951	1	0.561301	1	1	1	1	0.652937	0.568447	1	1	1	1	1	1	0.934984	1	0.107206	1	0.914823	0.425747	0.828954	1	1	0.826564	1	0.512151	1	1	1	1	0.140678	1	1	1	1	1.00022	1.00022	1	0.443788	0.922748	0.245126	0.509854
Node 89	0.469519	1.00044	0.807686	1	1	0.699778	0.672202	0.693474	0.807586	0.336029	0.267156	1	1	1	0.744982	0.811374	0.295856	0.743478	1	1	1	0.874182	1	0.396965	0.327296	0.251354	0.567435	0.687135	1	1	0.683178	1	0.762048	1	1	1	1	1	0.948407	1	1	0.646232	1.00044	1.00044	1	0.888516	0.851448	0.680199	0.759802
Node 9	0.759939	1.00099	0.618354	1	1	0.447776	0.475089	0.415816	0.360267	1	1	1	0.28048	0.289576	0.309842	0.156656	1	0.243919	1	1	1	0.73887	1	0.971905	0.765107	0.748066	0.832603	0.429773	1	1	0.424223	1	0.273754	1	1	1	1	0.494661	0.596457	1	1	0.339899	1.00099	1.00099	1	0.649186	0.696325	0.905378	0.803919
Node 90	1	1.00011	0.948014	1	1	0.914633	1	1	1	1	1	1	1	1	0.753967	0.340922	1	0.288278	1	1	0.0178396	0.966948	1	1	1	1	0.652512	0.910474	1	1	0.909161	1	1	1	1	1	1	1	0.748495	1	1	0.22874	1.00011	1.00011	1	0.666192	0.9606	1	1
[truncated: 41 more columns]
