# Supplementary material for: Conservation and Evolution of Cis-Regulatory Systems in Ascomycete Fungi
Source: PLoS Biol. 2004 Nov 9;2(12):e398. doi: 10.1371/journal.pbio.0020398 (PMC526180; doi:10.1371/journal.pbio.0020398)
Supplement: Dataset S31 — (404 KB XLS). [file pbio.0020398.sd031.xls]

## Sheet: Sheet1
UID	ABF1	ACE2	ADR1	AFT1	ARO80	ASH1	AZF1	BAS1	YAP1	CAT8	CBF1	CHA4	CRZ1	CUP2	DAL80	GATA	ECM22	FKH1	FLO8	FZF1	GAL4	GAT1	GATGAG1	GATGAG2	GCN4	GCR1	GLN3	GZF3	HAC1	HAP1	HAP4	HCM1	HSF1	IME1	INO2/4	LEU3	LYS14	MAC1	MAL63	MATALPHA	MCB	MCM1	MCM1-2	MCM1-3	MET30/31	MIG1	MOT3	MSN2/4	MTsite1
Cluster_ABF1
Cluster_ACE2	1	1.00121	0.45308	1	1	0.72682	1	1	0.031581	1	1	1	1	1	0.659792	1	1	1	1.00121	1.00121	1	0.887596	1.00121	0.231497	1	0.107821	0.748181	0.948886	1	1	0.0108102	1.00121	1	1	1.00121	1.00121	1	1	0.221866	1.00121	1	0.227696	1.00121	1.00121	1	0.45755	0.521607	1	1
Cluster_adata-aAlpha	1	1.00033	0.960667	1	1	0.125329	1	1	1	1	1	1	1	1	1	1	1	0.000848276	1.00033	1.00033	1	0.704439	1.00033	1	1	1	1	0.452532	1	1	0.816988	1.00033	1	1	1.00033	1.00033	1	1	1	1.00033	1	1	1.00033	1.00033	1	1	0.630738	1	1
Cluster_adata-ARG3	1	1.00143	0.961026	1	1	0.291629	0.0330079	0.124609	0.289565	1	0.22016	1	1	0.0691618	0.47591	0.302947	1	1	1.00143	1.00143	1	0.218912	1.00143	1	0.00046163	0.916424	0.463556	0.407764	1	1	0.883984	1.00143	0.653334	1	1.00143	1.00143	1	1	0.82769	1.00143	1	0.263163	1.00143	1.00143	1	1	0.42863	0.617111	1
Cluster_adata-CalciumSpecific	1	1.00242	0.682903	1	1	0.143901	0.374041	1	1	1	1	1	1	1	0.116947	0.457219	1	1	1.00242	1.00242	1	0.285033	1.00242	1	0.716337	0.915684	0.108168	0.173655	1	1	0.961003	1.00242	0.980525	1	1.00242	1.00242	0.274227	1	0.996415	1.00242	1	0.403734	1.00242	1.00242	1	1	0.615627	0.203161	1
Cluster_adata-Chaperones	1	1.00121	0.867543	1	1	0.113776	0.00261636	1	1	1	0.18973	1	1	1	1	1	1	1	1.00121	1.00121	1	0.276587	1.00121	1	1	0.29581	1	0.948886	1	1	0.774672	1.00121	0.0227227	1	1.00121	1.00121	0.147994	1	0.467023	1.00121	1	1	1.00121	1.00121	1	0.802777	0.801642	1	1
Cluster_adata-EGT2	1	1.00077	0.250888	1	1	0.227282	1	1	0.168087	1	1	1	1	1	0.406559	0.0142994	1	1	1.00077	1.00077	1	0.824492	1.00077	1	0.330055	0.737098	0.584124	0.177838	1	1	0.981006	1.00077	0.714089	1	1.00077	1.00077	1	1	0.833045	1.00077	1	1	1.00077	1.00077	1	1	0.73781	0.0100981	1
Cluster_adata-ENA1	1	1.00077	0.554921	1	1	0.937894	0.518271	1	1	1	1	1	1	1	1	1	1	1	1.00077	1.00077	1	0.441453	1.00077	1	1	0.737098	1	0.988013	1	1	0.354336	1.00077	1	1	1.00077	1.00077	1	1	1	1.00077	0.236254	1	1.00077	1.00077	1	0.644006	0.935384	1	1
Cluster_adata-ERD2	1	1.00088	0.727306	1	1	0.3643	0.566022	1	0.189682	1	1	1	1	1	0.189811	1	1	0.127968	1.00088	1.00088	1	0.392763	1.00088	1	1	1	0.241038	0.296352	1	1	0.481322	1.00088	0.760937	1	1.00088	1.00088	1	1	0.870734	1.00088	1	0.171285	1.00088	1.00088	1	0.692863	0.292486	1	1
Cluster_adata-G1DNAreplication	1	1.00132	0.926606	1	1	0.194643	1	1	1	1	1	1	1	0.0598195	0.924894	1	1	0.18571	1.00132	1.00132	1	0.612305	1.00132	1	1	0.347597	0.777871	0.524927	1	1	0.0266646	1.00132	0.6083	1	1.00132	1.00132	1	1	0.95356	1.00132	0.0730899	0.00232076	1.00132	1.00132	1	0.829856	0.158113	1	1
Cluster_adata-OAC1	1	1.00044	0.189505	1	1	1	1	1	1	1	0.0736238	1	1	1	0.0249049	0.105051	1	1	1.00044	1.00044	1	0.626776	1.00044	1	1	0.533863	0.394236	0.0480652	1	1	0.579617	1.00044	0.510976	1	1.00044	1.00044	1	1	0.640372	1.00044	1	0.0896432	1.00044	1.00044	1	1	0.540899	1	1
Cluster_adata-Respiration	1	1.00242	0.336636	1	1	0.858202	0.374041	1	1	1	0.00788405	0.000424818	1	0.530117	0.243103	1	1	0.313979	1.00242	1.00242	1	0.556803	1.00242	1	1	0.0262598	0.488702	0.632388	1	1	0.00490589	1.00242	0.896411	1	1.00242	1.00242	0.274227	1	0.210839	1.00242	1	0.0136989	1.00242	1.00242	1	0.356421	0.158192	0.470728	1
Cluster_adata-RET3	1	1.00253	0.772945	1	1	0.954093	0.187981	0.209894	1	1	1	1	1	1	0.993024	1	1	0.325644	1.00253	1.00253	1	0.89875	1.00253	1	0.732146	0.788966	0.944172	0.988037	1	1	0.725547	1.00253	0.162015	1	1.00253	1.00253	1	1	0.918707	1.00253	1	0.0986344	1.00253	1.00253	1	0.8438	0.58139	0.817215	1
Cluster_adata-Secretion	1	1.00209	0.328534	0.0287423	1	0.677933	0.574528	1	1	1	1	1	1	1	0.907554	1	1	0.0404843	1.00209	1.00209	1	0.650019	1.00209	0.365559	0.6631	0.665801	0.673214	0.389572	1	1	0.897374	1.00209	0.842335	1	1.00209	1.00209	1	1	0.949365	1.00209	0.519075	1	1.00209	1.00209	1	0.494279	0.224107	1	1
Cluster_adata-TRP4	1	1.00121	0.45308	1	1	0.967602	0.298583	0.00531017	1	1	0.18973	1	1	1	0.659792	0.263126	1	1	1.00121	1.00121	1	0.653897	1.00121	1	1.04287e-05	0.107821	0.748181	0.840708	1	1	0.918567	1.00121	0.263805	1	1.00121	1.00121	1	1	0.467023	1.00121	0.345331	0.227696	1.00121	1.00121	1	0.802777	0.184401	0.0384453	1
Cluster_adata-TUB	1	1.0011	0.283285	1	1	0.624326	0.0123245	1	1	1	1	1	1	1	0.605731	1	1	0.15733	1.0011	1.0011	1	0.310888	1.0011	1	1	0.851754	0.714526	0.543069	1	1	0.694967	1.0011	1	1	1.0011	1.0011	1	1	0.922515	1.0011	0.0523529	0.20933	1.0011	1.0011	1	0.407654	0.572522	0.029485	1
Cluster_ADR1	1	1.00165	0.902212	1	1	0.304825	0.791082	1	1	1	1	1	1	1	0.960705	1	1	0.226509	1.00165	1.00165	1	0.495706	1.00165	1	1	0.497467	1	0.783868	1	1	0.0180998	1.00165	0.931732	1	1.00165	1.00165	1	1	0.099779	1.00165	1	1	1.00165	1.00165	1	0.890768	0.637545	0.0859224	1
Cluster_ARG80	1	1.00143	0.989818	1	1	0.710848	1	1	1	1	1	1	1	1	0.0888266	1	1	1	1.00143	1.00143	1	0.834375	1.00143	1	1	0.176409	0.190727	0.625352	1	1	0.308162	1.00143	0.902326	1	1.00143	1.00143	1	1	0.334248	1.00143	1	1	1.00143	1.00143	1	0.853219	0.42863	1	1
Cluster_ARG81	1	1.00143	0.530887	1	1	0.954314	0.742537	1	1	1	0.22016	1	1	1	0.47591	1	1	1	1.00143	1.00143	1	0.834375	1.00143	0.267447	0.524861	0.687681	0.463556	0.407764	1	1	0.0146529	1.00143	1	1	1.00143	1.00143	1	1	0.589134	1.00143	1	0.263163	1.00143	1.00143	1	0.853219	0.13557	1	1
Cluster_Arginine	1	1.00132	0.611949	1	1	0.388468	0.336636	1	0.270621	1	0.20509	1	1	1	0.189446	0.283312	1	1	1.00132	1.00132	1	0.612305	1.00132	1	0.49685	0.898828	0.159931	0.304583	1	1	0.836891	1.00132	0.6083	1	1.00132	1.00132	1	1	0.95356	1.00132	1	1	1.00132	1.00132	1	0.22074	0.473572	0.587745	1
Cluster_ARO80	1	1.0011	0.540628	1	1	0.989378	0.260191	1	1	1	1	1	1	0.290415	0.884342	1	1	1	1.0011	1.0011	1	0.310888	1.0011	1	1	0.0791106	0.714526	0.301749	1	1	0.694967	1.0011	0.216542	1	1.0011	1.0011	1	1	0.169959	1.0011	0.319612	1	1.0011	1.0011	1	0.771393	0.957861	1	1
Cluster_ASH1	1	1.00121	0.45308	1	1	0.113776	1	0.10649	1	1	0.18973	1	1	1	0.362454	1	1	1	1.00121	1.00121	1	0.887596	1.00121	1	0.467191	0.593984	0.377974	0.840708	1	1	0.918567	1.00121	0.860267	1	1.00121	1.00121	1	1	0.747543	1.00121	0.345331	1	1.00121	1.00121	1	0.802777	0.184401	1	0.243733
Cluster_Asparagine	1	1.00033	0.731622	1	1	1	1	0.0302287	1	1	1	1	1	1	1	1	1	1	1.00033	1.00033	1	0.704439	1.00033	1	0.157709	1	1	1	1	1	1	1.00033	0.0716138	1	1.00033	1.00033	1	1	1	1.00033	0.00415843	1	1.00033	1.00033	1	1	0.630738	1	1
Cluster_Autophagy	1	1.00077	0.950746	1	1	0.774335	1	1	0.168087	1	1	1	1	1	0.406559	0.176558	1	1	1.00077	1.00077	1	0.824492	1.00077	0.154244	1	0.34996	1	0.177838	1	1	0.981006	1.00077	1	1	1.00077	1.00077	1	1	0.833045	1.00077	1	1	1.00077	1.00077	1	0.644006	0.99	0.403545	1
Cluster_AZF1	1	1.00121	0.867543	1	1	0.113776	0.298583	1	1	1	1	1	1	1	0.147846	0.263126	1	1	1.00121	1.00121	1	0.276587	1.00121	1	1	0.0056728	0.377974	0.649998	1	1	0.321871	1.00121	1	1	1.00121	1.00121	1	0.0167351	0.747543	1.00121	1	1	1.00121	1.00121	1	0.183121	0.801642	1	1
Cluster_BAS1	1	1.00121	0.693837	1	1	0.72682	0.682728	1	1	1	0.18973	1	1	0.314361	0.362454	1	1	1	1.00121	1.00121	1	0.887596	1.00121	0.231497	0.467191	0.593984	0.748181	0.840708	1	1	0.774672	1.00121	1	1	1.00121	1.00121	1	1	0.747543	1.00121	0.345331	1	1.00121	1.00121	1	0.45755	0.941052	0.55613	1
Cluster_Biotin	1	1.00033	0.960667	1	1	0.500739	1	0.0302287	1	1	1	1	1	1	1	1	1	1	1.00033	1.00033	1	0.966263	1.00033	1	0.000170905	0.435843	1	0.452532	1	1	0.398911	1.00033	1	1	1.00033	1.00033	1	1	0.129655	1.00033	1	1	1.00033	1.00033	1	1	0.944979	1	1
Cluster_CAD1	1	1.00099	0.133602	1	1	0.910748	0.609044	1	1	1	1	1	1	1	0.245844	0.221039	1	1	1.00099	1.00099	1	0.349438	1.00099	1	1	0.0106722	0.676377	0.422409	1	1	0.596699	1.00099	1	1	1.00099	1.00099	0.122806	1	0.637264	1.00099	1	1	1.00099	1.00099	1	1	0.250803	1	0.204308
Cluster_CBF1	1	1.00132	0.978744	1	1	0.807262	0.0247467	0.115596	1	1	1	1	1	1	0.707726	1	1	1	1.00132	1.00132	1	0.86186	1.00132	1	0.140944	0.347597	0.777871	0.739334	1	1	0.650235	1.00132	0.31212	1	1.00132	1.00132	1	1	0.95356	1.00132	1	1	1.00132	1.00132	1	0.829856	0.761782	1	1
Cluster_CHA4	1	1.00143	0.741648	1	1	0.710848	0.742537	0.124609	1	1	1	0.0183511	1	0.359863	0.749875	1	1	1	1.00143	1.00143	1	0.834375	1.00143	0.0365559	0.524861	0.176409	0.804064	0.407764	1	1	0.52112	1.00143	0.902326	1	1.00143	1.00143	0.172464	1	0.589134	1.00143	1	0.263163	1.00143	1.00143	1	0.853219	0.898543	0.235351	1
Cluster_CIN5	1	1.00264	0.00398843	1	1	0.421212	0.702697	1	0.127496	1	0.36831	1	1	0.561337	0.871548	1	1	0.337113	1.00264	1.00264	1	0.883103	1.00264	0.109382	0.747076	0.620013	0.950763	0.302193	1	1	0.31876	1.00264	0.777559	1	1.00264	1.00264	1	1	0.658308	1.00264	1	0.106019	1.00264	1.00264	1	0.225361	0.315232	0.241537	0.120508
Cluster_CRZ1	1	1.00099	0.844571	1	1	0.980653	0.221844	1	1	1	0.158119	1	1	1	0.0777445	0.00150448	1	0.142774	1.00099	1.00099	1	0.349438	1.00099	1	1	0.820556	0.28721	0.422409	1	1	0.596699	1.00099	1	1	1.00099	1.00099	1	1	0.123052	1.00099	0.292886	0.19053	1.00099	1.00099	1	1	0.250803	0.485454	1
Cluster_CUP9	1	1.00066	0.666874	1	1	0.657225	1	1	1	1	1	1	1	1	1	1	1	1	1.00066	1.00066	1	0.865143	1.00066	1	1	0.0691953	1	0.977442	1	1	0.226563	1.00066	0.658068	1	1.00066	1.00066	1	1	0.132679	1.00066	1	1	1.00066	1.00066	1	1	0.397765	1	1
Cluster_DAL81	1	1.00121	0.693837	1	1	0.275403	1	1	1	1	1	1	1	1	0.362454	0.0348497	1	1	1.00121	1.00121	1	0.276587	1.00121	1	0.121753	0.593984	1	0.649998	1	1	0.981516	1.00121	0.558936	1	1.00121	1.00121	1	1	0.467023	1.00121	1	1	1.00121	1.00121	1	0.802777	0.521607	1	1
Cluster_DAL82	1	1.00176	0.0118889	1	1	0.228254	0.0662961	1	1	1	0.263689	1	1	1	0.625527	1	1	1	1.00176	1.00176	1	0.744631	1.00176	0.318257	0.599896	1	0.289563	0.306138	1	1	0.890413	1.00176	0.500444	1	1.00176	1.00176	0.207868	1	0.735067	1.00176	0.460091	0.313346	1.00176	1.00176	1	0.665705	0.596357	0.316712	1
Cluster_DIG1	1	1.00121	0.693837	1	1	0.887493	1	1	1	1	1	1	1	1	0.362454	1	1	1	1.00121	1.00121	1	0.887596	1.00121	0.231497	0.467191	0.593984	0.377974	0.840708	1	1	0.144103	1.00121	0.558936	1	1.00121	1.00121	1	1	0.467023	1.00121	1	0.227696	1.00121	1.00121	1	1	0.184401	0.181744	1
Cluster_DOT6	1	1.00319	0.605854	1	1	0.969854	0.951669	0.257063	1	1	1	1	1	0.630636	0.325969	0.553264	1	0.391613	1.00319	1.00319	1	0.365703	1.00319	1	0.216647	0.583648	0.871705	0.365016	1	1	0.776051	1.00319	0.18525	1	1.00319	1.00319	0.344701	1	0.91938	1.00319	0.299807	1	1.00319	1.00319	1	0.365896	0.0673049	0.621494	1
Cluster_DrugResistance	1	1.00088	0.727306	1	1	0.145071	0.566022	1	1	1	1	1	1	1	0.00905281	1	1	1	1.00088	1.00088	1	0.392763	1.00088	0.174253	1	0.417211	0.00905428	0.106729	1	1	0.989222	1.00088	0.129302	1	1.00088	1.00088	1	1	0.569228	1.00088	1	1	1.00088	1.00088	1	0.302011	0.292486	0.446009	1
Cluster_Endocytosis	1	1.00121	0.0687522	1	1	0.113776	0.0874271	1	0.251175	1	1	1	1	1	0.659792	0.263126	1	1	1.00121	1.00121	1	0.887596	1.00121	0.231497	1	0.29581	1	0.414755	1	1	0.555483	1.00121	1	1	1.00121	1.00121	1	1	0.747543	1.00121	1	1	1.00121	1.00121	1	0.802777	0.184401	0.181744	1
Cluster_FattyAcid	1	1.00242	0.00780306	1	1	0.41763	0.655758	0.201749	1	1	1	1	1	1	0.945376	1	1	1	1.00242	1.00242	1	0.285033	1.00242	1	0.716337	0.915684	0.936699	0.778749	1	1	0.497489	1.00242	0.896411	1	1.00242	1.00242	0.274227	1	0.765382	1.00242	0.571631	1	1.00242	1.00242	1	0.0702803	0.991737	1	1
Cluster_FHL1	1	1.00496	0.758014	1	1	0.277474	0.0719226	1	0.326412	1	0.209339	1	1	0.451169	0.147555	1	1	1	1.00496	1.00496	1	0.113064	1.00496	0.660138	0.722611	0.245733	0.0335328	0.233515	1.00001	1	0.17847	1.00496	0.768524	1.00001	1.00496	1.00496	1	1	0.909091	1.00496	0.511185	1	1.00496	1.00496	1	0.757984	0.0083244	0.630223	1
Cluster_FKH1	0.0221261	1.00066	0.89306	1	1	0.344623	1	1	1	1	0.108389	1	1	1	0.725815	1	1	1	1.00066	1.00066	1	0.865143	1.00066	1	1	1	1	0.858104	1	1	0.966532	1.00066	1	1	1.00066	1.00066	1	1	0.407285	1.00066	0.206264	1	1.00066	1.00066	1	1	0.958791	1	1
Cluster_FKH2	1	1.0022	0.896787	1	1	0.943046	0.0414906	0.18521	1	1	1	1	1	1	0.774899	1	1	0.290042	1.0022	1.0022	1	0.982414	1.0022	0.380588	0.0964919	0.467435	0.918624	0.960789	1	1	0.694089	1.0022	0.972128	1	1.0022	1.0022	1	1	0.692497	1.0022	0.537272	0.0774538	1.0022	1.0022	1	0.781602	0.855243	0.771798	1
Cluster_Flavin	1	1.00044	0.882781	1	1	0.0627055	1	1	1	1	1	1	1	0.00649668	0.577907	1	1	1	1.00044	1.00044	1	0.937426	1.00044	1	1	1	0.394236	0.920134	1	1	0.896111	1.00044	0.510976	1	1.00044	1.00044	1	1	0.640372	1.00044	1	1	1.00044	1.00044	1	0.445723	0.900255	1	1
Cluster_Flocculation	1	1.00022	1	1	1	0.75052	1	1	1	1	1	1	1	1	1	1	1	1	1.00022	1.00022	1	0.791713	1.00022	1	1	0.317226	1	1	1	1	0.677629	1.00022	1	1	1.00022	1.00022	1	1	1	1.00022	1	1	1.00022	1.00022	1	1	0.735485	1	1
Cluster_FZF1	1	1.00121	0.867543	1	1	0.72682	1	1	1	1	1	1	1	1	0.659792	0.263126	1	0.171641	1.00121	1.00121	1	0.653897	1.00121	1	1	0.29581	0.748181	0.649998	1	1	0.555483	1.00121	0.860267	1	1.00121	1.00121	1	1	0.747543	1.00121	1	1	1.00121	1.00121	1	0.802777	0.521607	1	1
Cluster_GAL4	1	1.00088	0.904985	1	1	0.965118	0.184016	1	1	1	1	1	1	0.239995	0.050809	0.0187246	1	0.127968	1.00088	1.00088	1	0.392763	1.00088	1	1	0.148206	0.633136	0.296352	1	1	0.923498	1.00088	1	1	1.00088	1.00088	0.109936	1	0.569228	1.00088	1	1	1.00088	1.00088	1	1	0.681322	1	1
Cluster_Galactose	1	1.00033	0.287244	1	1	0.87541	0.26871	1	1	1	1	1	1	1	1	1	1	1	1.00033	1.00033	1	0.704439	1.00033	1	1	0.0799935	1	1	1	1	0.816988	1.00033	1	1	1.00033	1.00033	1	1	1	1.00033	1	1	1.00033	1.00033	1	1	0.630738	1	1
Cluster_GAT1	1	1.00132	0.926606	1	1	0.6142	0.00412253	1	1	1	1	1	1	1	0.924894	1	1	1	1.00132	1.00132	1	0.612305	1.00132	0.249686	1	0.347597	0.777871	0.739334	1	1	0.650235	1.00132	0.883173	1	1.00132	1.00132	0.160318	1	0.95356	1.00132	1	0.245637	1.00132	1.00132	1	1	0.473572	0.587745	1
Cluster_GAT3	1	1.00055	0.125015	1	1	0.968938	0.406451	1	1	1	1	1	1	1	0.250327	1	1	1	1.00055	1.00055	1	0.903208	1.00055	1	0.248799	0.614862	0.465604	0.770457	1	1	0.374396	1.00055	1	1	1.00055	1.00055	1	1	1	1.00055	1	1	1.00055	1.00055	1	1	0.463847	0.308621	1
Cluster_GCN4	1	1.00264	0.722646	1	1	0.847741	0.000291793	0.0244606	0.468231	1	0.36831	1	1	1	0.871548	1	1	1	1.00264	1.00264	1	0.883103	1.00264	0.437244	0.0016336	0.620013	0.792577	0.61712	1	1	0.778628	1.00264	0.986394	1	1.00264	1.00264	1	1	0.932234	1.00264	1	0.431149	1.00264	1.00264	1	0.971124	0.955294	0.241537	1
Cluster_GCR1	1	1.00077	0.554921	1	1	0.501078	0.147283	1	0.168087	1	0.125282	1	1	1	0.406559	1	1	1	1.00077	1.00077	1	0.441453	1.00077	1	1	1	0.19525	0.0441432	1	1	0.648148	1.00077	0.714089	1	1.00077	1.00077	1	1	0.492359	1.00077	1	1	1.00077	1.00077	1	0.24766	0.341091	0.403545	1
Cluster_GCR2	0.0366121	1.0011	0.540628	1	1	0.624326	0.647806	1	1	1	1	1	1	1	0.303924	1	1	0.15733	1.0011	1.0011	1	0.696388	1.0011	0.212868	1	0.539771	0.333042	0.771359	1	1	0.224907	1.0011	0.505276	1	1.0011	1.0011	1	1	0.400162	1.0011	1	1	1.0011	1.0011	1	1	0.572522	1	1
Cluster_GeneralTFs	1	1.0022	0.637117	1	1	0.0208043	0.876109	1	1	1	1	1	1	1	0.922294	1	1	0.0444919	1.0022	1.0022	1	0.0965202	1.0022	0.0110372	0.68187	0.467435	0.918624	0.474282	1	1	0.694089	1.0022	0.41921	1	1.0022	1.0022	1	1	0.862131	1.0022	1	0.375004	1.0022	1.0022	1	0.530252	0.684549	0.421465	1
Cluster_GLN3	1	1.00198	0.757616	1	1	0.952453	0.261325	1	1	1	0.291357	1	1	1	0.118305	0.0856111	1	1	1.00198	1.00198	1	0.959355	1.00198	0.0664116	0.643225	0.38323	0.895392	0.163871	1	1	0.0981255	1.00198	0.960115	1	1.00198	1.00198	1	1	0.604761	1.00198	1	1	1.00198	1.00198	1	0.728868	0.51674	0.735423	1
Cluster_Glutamate	1	1.00044	0.986629	1	1	0.68828	0.341167	0.0401027	1	1	1	1	1	1	1	1	1	1	1.00044	1.00044	1	0.937426	1.00044	1	0.204554	0.533863	1	0.638569	1	1	0.896111	1.00044	0.510976	1	1.00044	1.00044	1	1	1	1.00044	1	0.0896432	1.00044	1.00044	1	1	0.900255	1	1
Cluster_Glutathione	1	1.00055	0.125015	1	1	0.500924	0.406451	1	1	1	1	1	1	1	0.659802	1	1	1	1.00055	1.00055	1	0.557668	1.00055	1	0.248799	1	1	0.770457	1	1	0.941032	1.00055	0.591079	1	1.00055	1.00055	1	1	0.0793854	1.00055	0.175099	1	1.00055	1.00055	1	1	0.463847	0.308621	1
Cluster_Glycerol	1	1.00055	0.447461	1	1	0.813183	1	1	1	1	1	1	1	1	0.659802	1	1	1	1.00055	1.00055	1	0.557668	1.00055	0.00530717	1	0.209869	1	0.440738	1	1	0.71643	1.00055	0.190564	1	1.00055	1.00055	1	1	0.721527	1.00055	1	1	1.00055	1.00055	1	0.521767	0.463847	0.308621	1
Cluster_Glycogen	1	1.00044	0.189505	1	1	0.937787	0.0513408	0.0401027	1	1	1	1	1	0.12819	0.171524	0.105051	1	1	1.00044	1.00044	1	0.937426	1.00044	1	0.204554	0.533863	0.394236	0.266494	1	1	0.896111	1.00044	0.510976	1	1.00044	1.00044	1	1	1	1.00044	1	1	1.00044	1.00044	1	0.0932255	0.540899	0.0275298	1
Cluster_GTS1	1	1.00165	0.382236	1	1	0.697885	0.445977	1	1	1	0.249455	1	1	1	0.0534066	0.0619524	1	1	1.00165	1.00165	1	0.775452	1.00165	1	1	0.94297	0.0905986	0.0351716	1	1	0.295663	1.00165	1	1	1.00165	1.00165	1	1	0.691607	1.00165	0.108058	1	1.00165	1.00165	1	0.890768	0.845636	0.0859224	1
Cluster_HAL9	1	1.00099	0.633494	1	1	0.501213	0.609044	1	1	1	1	1	1	1	0.54537	0.221039	1	1	1.00099	1.00099	1	0.349438	1.00099	1	0.0856832	0.480725	0.676377	0.680043	1	1	0.337101	1.00099	0.800113	1	1.00099	1.00099	1	1	0.331101	1.00099	1	1	1.00099	1.00099	1	0.735019	0.250803	0.485454	1
Cluster_HAP2	1	1.00132	0.168267	1	1	0.807262	0.336636	1	1	1	0.0207679	1	1	1	0.707726	1	1	1	1.00132	1.00132	1	0.246067	1.00132	1	1	0.347597	0.777871	0.739334	1	1	0.422832	1.00132	1	1	1.00132	1.00132	1	1	0.111296	1.00132	0.37008	1	1.00132	1.00132	1	0.504912	0.473572	0.587745	1
Cluster_HAP3	0.0649619	1.00198	0.584343	1	1	0.882125	0.544511	1	0.377182	1	0.0447141	1	1	1	0.472751	0.393371	1	1	1.00198	1.00198	1	0.68167	1.00198	1	1	0.38323	0.895392	0.305736	1	1	0.725869	1.00198	0.960115	1	1.00198	1.00198	1	1	0.0891506	1.00198	1	1	1.00198	1.00198	1	0.929884	0.752204	0.36995	1
Cluster_HAP4	1	1.00187	0.81217	1	1	0.92901	0.513046	1	1	1	0.00373103	1	1	1	0.42568	1	1	0.0329137	1.00187	1.00187	1	0.713285	1.00187	0.334402	1	0.0181888	0.611737	0.226922	1	1	0.0211133	1.00187	0.952288	1	1.00187	1.00187	1	1	0.333308	1.00187	1	0.329306	1.00187	1.00187	1	0.698658	0.555984	0.343505	1
Cluster_HAP5	1	1.00209	0.838635	1	1	0.501737	0.289368	1	1	1	0.304801	1	1	0.479086	0.301999	1	1	1	1.00209	1.00209	1	0.650019	1.00209	1	1	0.665801	0.391142	0.389572	1	1	0.273489	1.00209	0.966658	1	1.00209	1.00209	1	1	0.650466	1.00209	0.159778	1	1.00209	1.00209	1	1	0.877889	0.754282	1
Cluster_Heme	1	1.00077	0.816146	1	1	0.937894	0.518271	1	1	1	1	1	1	0.213461	0.779025	1	1	1	1.00077	1.00077	1	0.824492	1.00077	1	0.0537795	0.34996	0.584124	0.430946	1	1	0.879685	1.00077	1	1	1.00077	1.00077	1	1	0.492359	1.00077	1	1	1.00077	1.00077	1	0.24766	0.73781	1	1
Cluster_HIR1	1	1.00088	0.904985	1	1	0.145071	0.184016	1	1	1	1	1	1	1	0.478808	0.199106	1	1	1.00088	1.00088	1	0.782286	1.00088	1	1	0.417211	0.633136	0.565539	1	1	0.748244	1.00088	1	1	1.00088	1.00088	0.109936	1	0.870734	1.00088	1	1	1.00088	1.00088	1	1	0.292486	1	1
Cluster_HIR2	1	1.00088	0.45149	1	1	0.856222	0.00482893	1	0.189682	1	1	1	1	1	0.478808	1	1	1	1.00088	1.00088	1	0.392763	1.00088	1	1	0.000553514	0.241038	0.565539	1	1	0.481322	1.00088	0.760937	1	1.00088	1.00088	1	1	0.870734	1.00088	1	0.171285	1.00088	1.00088	1	0.302011	0.907274	0.446009	1
Cluster_Histidine	1	1.00077	0.0543972	1	1	0.774335	1	1	1	1	1	1	1	0.213461	0.779025	1	1	1	1.00077	1.00077	1	0.441453	1.00077	1	0.0537795	0.34996	0.584124	0.988013	1	1	0.130733	1.00077	1	1	1.00077	1.00077	1	1	0.492359	1.00077	1	0.151585	1.00077	1.00077	1	0.24766	0.73781	0.0835511	1
Cluster_HMS1	1	1.00088	0.727306	1	1	0.856222	0.184016	1	1	1	1	1	1	1	0.478808	1	1	1	1.00088	1.00088	1	0.782286	1.00088	1	0.367331	0.148206	0.241038	0.296352	1	1	0.481322	1.00088	1	1	1.00088	1.00088	1	1	0.569228	1.00088	0.265114	1	1.00088	1.00088	1	0.692863	0.681322	0.446009	1
Cluster_HSF1	1	1.00154	0.980036	1	1	0.000919792	0.00138653	1	0.308019	1	0.0279356	1	1	1	0.00972357	0.322046	1	1	1.00154	1.00154	1	0.194751	1.00154	1	1	0.930961	0.0180429	0.0567301	1	1	0.918735	1.00154	0.0645167	1	1.00154	1.00154	1	1	0.642968	1.00154	0.416814	1	1.00154	1.00154	1	0.873377	0.679163	0.644388	1
Cluster_IME4	1	1.00099	0.360488	1	1	0.910748	0.0080159	1	1	1	1	1	1	1	0.245844	0.221039	1	1	1.00099	1.00099	1	0.932523	1.00099	0.193791	1	0.054796	0.676377	0.195507	1	1	0.337101	1.00099	1	1	1.00099	1.00099	1	1	0.331101	1.00099	1	1	1.00099	1.00099	1	0.735019	0.250803	0.485454	1
Cluster_INO2	1	1.00143	0.741648	1	1	0.867521	0.742537	1	0.0432952	1	0.22016	1	1	0.359863	0.749875	0.302947	1	0.0197291	1.00143	1.00143	1	0.218912	1.00143	0.267447	0.524861	0.916424	0.804064	0.00603184	1	1	0.52112	1.00143	0.653334	1	1.00143	1.00143	0.172464	1	0.589134	1.00143	1	0.0353242	1.00143	1.00143	1	1	0.898543	0.617111	1
Cluster_INO4	1	1.00176	0.523537	1	1	0.599824	1	1	1	1	0.263689	1	1	1	0.846207	0.358696	1	0.0293631	1.00176	1.00176	1	0.744631	1.00176	0.318257	1	0.297669	0.865537	0.157194	1	1	0.38036	1.00176	0.500444	1	1.00176	1.00176	0.207868	1	0.50328	1.00176	0.460091	0.313346	1.00176	1.00176	1	0.665705	0.816026	0.693259	1
Cluster_InvasiveGrowth	1	1.00033	0.287244	1	1	0.125329	1	1	1	1	1	1	1	1	0.476311	1	1	1	1.00033	1.00033	1	0.704439	1.00033	1	1	0.435843	1	0.849743	1	1	0.398911	1.00033	0.415194	1	1.00033	1.00033	1	1	1	1.00033	1	1	1.00033	1.00033	1	1	0.630738	1	1
Cluster_Isoleucine	1	1.00066	0.89306	1	1	0.657225	0.00121785	0.0595532	1	1	0.108389	1	1	1	0.725815	1	1	1	1.00066	1.00066	1	0.865143	1.00066	1	0.290587	1	1	0.595163	1	1	1	1.00066	0.658068	1	1.00066	1.00066	1	1	0.132679	1.00066	1	1	1.00066	1.00066	1	1	0.397765	0.357832	1
Cluster_IXR1	1	1.00088	0.184021	1	1	0.3643	1	1	1	1	0.141856	1	1	1	0.478808	1	1	1	1.00088	1.00088	1	0.392763	1.00088	1	1	0.782797	0.633136	0.565539	1	1	0.22735	1.00088	1	1	1.00088	1.00088	1	1	0.870734	1.00088	1	1	1.00088	1.00088	1	0.302011	0.292486	0.446009	1
Cluster_LEU3	1	1.00121	0.45308	1	1	0.994217	0.0874271	1	1	1	1	1	1	1	0.362454	1	1	1	1.00121	1.00121	1	0.887596	1.00121	1	1	0.593984	0.377974	0.840708	1	1	0.321871	1.00121	0.860267	1	1.00121	1.00121	1	1	0.467023	1.00121	1	1	1.00121	1.00121	1	0.802777	0.801642	1	1
Cluster_Leucine	1	1.00055	0.125015	1	1	1	0.406451	1	1	1	1	1	1	1	0.250327	1	1	1	1.00055	1.00055	1	0.903208	1.00055	1	1	1	0.465604	0.770457	1	1	0.941032	1.00055	0.190564	1	1.00055	1.00055	1	1	0.0105878	1.00055	1	1	1.00055	1.00055	1	0.141548	0.976981	1	1
Cluster_Lysine	1	1.00066	0.0824674	1	1	0.344623	0.112342	0.0595532	0.145919	1	0.108389	1	1	1	0.0915047	1	1	1	1.00066	1.00066	1	0.865143	1.00066	1	0.0398577	0.280206	0.150772	0.0823417	1	1	0.522229	1.00066	0.658068	1	1.00066	1.00066	1	1	1	1.00066	1	0.131418	1.00066	1.00066	1	0.193676	0.397765	1	1
Cluster_MAC1	1	1.0011	0.916349	1	1	0.624326	0.0684575	1	1	1	1	1	1	1	0.884342	1	1	1	1.0011	1.0011	1	0.911256	1.0011	0.212868	1	0.244541	0.714526	0.771359	1	1	0.970071	1.0011	0.0658583	1	1.0011	1.0011	1	0.0152245	0.922515	1.0011	1	1	1.0011	1.0011	1	0.771393	0.215057	0.522095	1
Cluster_MAL13	1	1.00198	0.388251	1	1	0.24144	0.261325	1	0.377182	1	1	1	1	1	0.890227	1	1	0.265276	1.00198	1.00198	1	0.68167	1.00198	0.0664116	0.643225	0.627895	0.895392	0.992058	1	1	0.725869	1.00198	0.81924	1	1.00198	1.00198	1	0.0272489	0.937504	1.00198	0.500164	0.344897	1.00198	1.00198	1	0.226451	0.752204	0.735423	1
Cluster_MAL33	1	1.00165	0.0715401	1	1	0.304825	0.791082	1	1	1	1	1	1	1	0.57904	1	1	1	1.00165	1.00165	1	0.495706	1.00165	1	0.201536	0.497467	0.541794	0.604489	1	1	0.14654	1.00165	0.730873	1	1.00165	1.00165	0.196237	1	0.691607	1.00165	1	1	1.00165	1.00165	1	1	0.637545	0.669725	0.316843
Cluster_Maltose	1	1.00077	0.0543972	1	1	0.501078	1	1	1	1	1	1	1	1	0.779025	1	1	1	1.00077	1.00077	1	0.824492	1.00077	1	1	0.737098	1	0.718326	1	1	0.354336	1.00077	1	1	1.00077	1.00077	1	1	1	1.00077	0.236254	0.151585	1.00077	1.00077	1	0.644006	0.73781	0.0100981	1
Cluster_ManualAFT1targets	1	1.00044	0.580464	1	1	0.313198	0.341167	1	1	1	1	1	1	1	0.577907	1	1	1	1.00044	1.00044	1	0.626776	1.00044	1	0.204554	0.141782	0.394236	0.266494	1	1	0.896111	1.00044	1	1	1.00044	1.00044	1	1	1	1.00044	1	1	1.00044	1.00044	1	1	0.540899	1	1
Cluster_ManualG1genes	1	1.00452	0.99997	1	1	0.26798	0.215967	0.343202	1	1	0.544097	1	1	1	0.921316	1	1	0.0319009	1.00452	1.00452	1	0.705147	1.00452	1	0.191857	0.942345	0.53863	0.585612	1.00001	1	0.990234	1.00452	0.218674	1.00001	1.00452	1.00452	1	1	0.970092	1.00452	2.70691e-24	1	1.00452	1.00452	1	1	0.145172	1	1
Cluster_ManualHAP1targets	1	1.00352	0.992005	1	1	0.432113	0.0907232	1	0.56934	1	0.000305547	1	1	0.666859	0.771474	1	0.0479641	0.422152	1.00352	1.00352	1	0.299183	1.00352	0.535543	0.840181	0.315422	0.744503	0.699723	1.00001	1	0.0481867	1.00352	0.619434	1.00001	1.00352	1.00352	1	1	0.605398	1.00352	0.118606	0.528821	1.00352	1.00352	1	0.946029	0.699907	0.906112	0.556756
Cluster_ManualMethionine	1	1.0022	0.453304	1	1	0.413543	0.00222791	0.18521	1	1	0.317991	1	1	1	0.774899	1	1	1	1.0022	1.0022	1	0.982414	1.0022	1	0.30647	0.700807	0.918624	0.474282	1	1	0.99242	1.0022	0.41921	1	1.0022	1.0022	1	1	0.994015	1.0022	1	1	1.0022	1.0022	1	0.290436	0.199832	0.771798	1
Cluster_ManualM-G1genes	1	1.00044	0.580464	1	1	0.68828	1	1	1	1	1	1	1	1	1	1	1	0.0661593	1.00044	1.00044	1	0.937426	1.00044	1	1	1	1	0.920134	1	1	0.896111	1.00044	1	1	1.00044	1.00044	1	1	0.640372	1.00044	1	1	1.00044	1.00044	1	1	0.540899	1	1
Cluster_ManualYap1Targets	1	1.00374	0.2298	1	1	0.570321	0.0457707	1	0.0571891	1	0.135099	1	1	1	0.91846	1	1	1	1.00374	1.00374	1	0.260213	1.00374	0.55732	0.292649	0.553486	0.781156	0.797403	1.00001	1	0.966462	1.00374	0.674802	1.00001	1.00374	1.00374	0.39084	1	0.22099	1.00374	0.730469	0.550509	1.00374	1.00374	1	0.320085	0.266469	0.0307952	0.578773
Cluster_ManualZAP1targets	1	1.00198	0.757616	1	1	0.40882	0.544511	1	0.377182	1	1	1	1	0.460877	0.707472	0.0856111	1	1	1.00198	1.00198	1	0.68167	1.00198	1	0.643225	0.96786	1	0.818706	1	1	0.362682	1.00198	0.159088	1	1.00198	1.00198	1	1	0.990009	1.00198	1	1	1.00198	1.00198	1	0.728868	0.752204	0.36995	0.367018
Cluster_ManualZAP1targets-2	1	1.00518	0.328038	1	1	0.281815	0.503731	1	0.345476	1	0.593724	1	1	0.473716	0.716269	0.0389561	1	1	1.00518	1.00518	1	0.397309	1.00518	0.305584	0.489614	0.929395	0.927004	0.558205	1.00001	1	0.701884	1.00518	0.135055	1.00001	1.00518	1.00518	1	1	0.501348	1.00518	1	1	1.00518	1.00518	1	0.791252	0.648591	0.240396	0.330344
Cluster_MATa1	1	1.00143	0.989818	1	1	0.954314	0.374039	1	1	1	1	1	1	0.359863	0.234166	0.302947	1	1	1.00143	1.00143	1	0.218912	1.00143	0.267447	1	0.687681	0.804064	0.0896305	1	1	0.308162	1.00143	0.360612	1	1.00143	1.00143	0.0145579	1	0.334248	1.00143	1	1	1.00143	1.00143	1	0.853219	0.13557	1	1
Cluster_Mating
Cluster_MBP1	1	1.00242	0.998898	1	1	0.974179	0.0598375	1	0.439459	1	1	1	1	1	0.829005	1	1	0.00581949	1.00242	1.00242	1	0.781295	1.00242	0.0943547	0.348049	0.762293	0.750324	0.885483	1	1	0.497489	1.00242	0.980525	1	1.00242	1.00242	1	1	0.902753	1.00242	0.00115436	1	1.00242	1.00242	1	0.825109	0.375208	1	1
Cluster_MCM1	1	1.00176	0.943638	1	1	0.599824	0.480177	1	1	1	1	1	1	1	0.846207	0.358696	1	1	1.00176	1.00176	1	0.744631	1.00176	1	1	0.794145	1	0.688515	1	1	0.961646	1.00176	0.763792	1	1.00176	1.00176	1	1	0.905446	1.00176	1	0.313346	1.00176	1.00176	1	1	0.596357	0.693259	1
Cluster_MET31	1	1.00099	0.953315	1	1	0.74717	0.221844	0.0880002	1	1	1	1	1	1	0.54537	0.221039	1	1	1.00099	1.00099	1	0.932523	1.00099	1	0.0856832	0.194912	0.676377	0.195507	1	1	0.596699	1.00099	0.800113	1	1.00099	1.00099	1	1	0.899917	1.00099	1	1	1.00099	1.00099	1	0.735019	0.625951	1	1
Cluster_MET4	1	1.00143	0.961026	1	1	0.291629	0.00615896	0.124609	1	1	1	1	1	1	0.0888266	0.0476881	1	1	1.00143	1.00143	1	0.834375	1.00143	0.267447	0.160719	0.687681	0.463556	0.0896305	1	1	0.964335	1.00143	0.653334	1	1.00143	1.00143	1	1	1	1.00143	1	1	1.00143	1.00143	1	1	0.42863	1	1
Cluster_MIG1	1	1.00165	0.0715401	1	1	0.941365	0.180273	1	0.325996	1	1	1	1	1	0.329129	0.340625	1	1	1.00165	1.00165	1	0.495706	1.00165	1	0.201536	0.255685	0.847555	0.604489	1	1	0.491657	1.00165	0.455312	1	1.00165	1.00165	1	1	0.0337815	1.00165	0.438868	0.297008	1.00165	1.00165	1	0.339438	0.637545	0.669725	1
Cluster_Mitochondria	1	1.00341	0.352558	1	1	0.361893	0.36919	1	0.557831	1	0.0203307	1	1	1	0.745857	1	1	1	1.00341	1.00341	1	0.74811	1.00341	1	0.520757	0.457389	0.724415	0.765671	1.00001	1	0.0688206	1.00341	0.589748	1.00001	1.00341	1.00341	0.363559	1	0.731507	1.00341	0.697353	1	1.00341	1.00341	1	0.245219	0.858055	1	1
Cluster_MitochondrialRPs	1	1.00463	0.852686	1	1	0.861998	0.609011	1	0.669223	1	0.188586	1	1	0.416355	0.930836	0.688964	1	0.51336	1.00463	1.00463	1	0.500739	1.00463	1	1	0.761493	0.994882	0.902535	1.00001	1	0.148073	1.00463	0.137476	1.00001	1.00463	1.00463	0.458046	1	0.629158	1.00463	1	0.627764	1.00463	1.00463	1	0.984507	0.436272	0.175836	1
Cluster_MOT3	1	1.00088	0.727306	1	1	0.856222	1	1	1	1	1	1	1	1	0.189811	1	1	1	1.00088	1.00088	1	0.392763	1.00088	0.174253	1	0.417211	0.633136	0.296352	1	1	0.481322	1.00088	0.760937	1	1.00088	1.00088	1	1	0.870734	1.00088	1	1	1.00088	1.00088	1	1	0.681322	1	1
Cluster_mRNAprocessing	0.206988	1.00685	0.744132	1	1	0.651609	0.156192	1	1	1	0.328712	1	1	0.881549	0.788816	0.821985	0.0909819	0.283475	1.00685	1.00685	1	0.171887	1.00685	0.180505	0.866868	0.0157407	0.448881	0.876919	1.00002	1	0.801219	1.00685	0.817935	1.00002	1.00685	1.00685	1	1	0.918901	1.00685	0.685317	0.423643	1.00685	1.00685	1	0.977855	0.32644	0.98986	1
Cluster_MSS11	1	1.00154	0.453618	1	1	0.789287	0.41055	0.00861335	1	1	1	1	1	1	0.529058	1	1	1	1.00154	1.00154	1	0.533005	1.00154	0.284789	0.180953	0.930961	0.222842	0.712116	1	1	0.918735	1.00154	0.694132	1	1.00154	1.00154	1	1	0.858477	1.00154	1	1	1.00154	1.00154	1	0.591173	0.679163	0.262506	1
Cluster_MTH1	1	1.00132	0.373646	1	1	0.388468	0.108321	0.115596	1	1	1	1	1	1	0.924894	1	1	0.0168798	1.00132	1.00132	1	0.246067	1.00132	0.249686	0.140944	0.643261	1	0.524927	1	1	0.422832	1.00132	0.6083	1	1.00132	1.00132	1	1	0.277151	1.00132	1	0.030346	1.00132	1.00132	1	0.504912	0.158113	0.0486203	1
Cluster_NDD1	1	1.00253	0.452805	1	1	0.203484	0.0704843	1	1	1	1	1	1	1	0.851602	0.472106	1	0.0573322	1.00253	1.00253	1	0.756568	1.00253	1	1	0.927752	0.944172	0.988037	1	1	0.569709	1.00253	0.751552	1	1.00253	1.00253	1	1	0.918707	1.00253	0.587845	0.0986344	1.00253	1.00253	1	0.3895	0.58139	0.222183	1
Cluster_NRG1	1	1.00066	0.89306	1	1	0.10976	1	1	1	1	1	1	1	1	0.725815	0.153379	1	1	1.00066	1.00066	1	0.496173	1.00066	1	1	0.0691953	1	0.595163	1	1	0.813531	1.00066	1	1	1.00066	1.00066	1	1	0.784376	1.00066	1	1	1.00066	1.00066	1	1	0.397765	1	1
Cluster_NuclearProteinTargetting	1	1.00363	0.939724	1	1	0.638214	0.0038081	0.28695	1	1	1	1	1	0.678128	1	1	1	1	1.00363	1.00363	1	0.976079	1.00363	0.182954	0.849098	0.942665	1	0.997885	1.00001	1	0.127511	1.00363	0.812537	1.00001	1.00363	1.00363	1	1	0.787316	1.00363	1	1	1.00363	1.00363	1	0.952235	0.673341	1	1
Cluster_PDR1	1	1.00077	0.554921	1	1	0.992259	0.0249882	1	1	1	1	1	1	1	0.779025	0.176558	1	1	1.00077	1.00077	1	0.96677	1.00077	0.154244	1	0.34996	1	0.914016	1	1	0.648148	1.00077	1	1	1.00077	1.00077	1	1	0.194601	1.00077	1	1	1.00077	1.00077	1	0.24766	0.341091	1	1
Cluster_PentosePhosphate	1	1.00077	0.250888	1	1	0.0627518	0.147283	1	1	1	1	1	1	0.213461	0.779025	1	1	1	1.00077	1.00077	1	0.441453	1.00077	1	0.330055	0.737098	0.584124	0.0441432	1	1	0.00280849	1.00077	0.714089	1	1.00077	1.00077	1	1	0.833045	1.00077	1	1	1.00077	1.00077	1	0.058717	0.73781	0.0835511	1
Cluster_Peroxisome	1	1.00121	0.219612	1	1	0.113776	0.298583	1	1	1	1	1	1	1	0.362454	1	1	1	1.00121	1.00121	1	0.653897	1.00121	1	0.467191	0.29581	0.130848	0.414755	1	1	0.774672	1.00121	1	1	1.00121	1.00121	0.147994	1	0.940012	1.00121	1	1	1.00121	1.00121	1	0.45755	0.941052	1	1
Cluster_PHD1	1	1.00143	0.303761	1	1	0.710848	0.374039	1	1	1	0.0242423	1	1	1	0.749875	1	1	1	1.00143	1.00143	1	0.834375	1.00143	1	1	1	0.463556	0.927315	1	1	0.964335	1.00143	0.902326	1	1.00143	1.00143	1	1	0.82769	1.00143	0.084286	1	1.00143	1.00143	1	0.549496	0.13557	0.617111	0.281213
Cluster_PHO4	1	1.00055	0.447461	1	1	0.813183	1	1	1	1	1	1	1	0.157591	0.659802	1	1	1	1.00055	1.00055	1	0.557668	1.00055	0.112766	1	1	0.465604	0.440738	1	1	0.374396	1.00055	0.591079	1	1.00055	1.00055	1	1	0.0105878	1.00055	1	1	1.00055	1.00055	1	0.521767	0.849104	0.308621	1
Cluster_Phospholipid	1	1.00242	0.512706	1	1	0.586019	0.00411033	1	1	1	0.34363	1	1	1	0.243103	0.0212235	1	1	1.00242	1.00242	1	0.972011	1.00242	1	1	0.547071	0.488702	0.0359041	1	1	0.805605	1.00242	0.723155	1	1.00242	1.00242	0.0037126	1	0.902753	1.00242	1	1	1.00242	1.00242	1	0.174346	0.375208	0.803179	1
Cluster_Polyamine	1	1.00044	0.580464	1	1	0.937787	0.00358821	0.0401027	0.0998022	1	1	1	1	1	1	1	1	1	1.00044	1.00044	1	0.626776	1.00044	1	0.204554	0.141782	1	0.920134	1	1	0.896111	1.00044	1	1	1.00044	1.00044	1	1	1	1.00044	1	1	1.00044	1.00044	1	0.445723	0.989704	1	1
Cluster_primig-EarlySpo	1	1.00275	0.669527	1	1	0.213301	0.926553	0.225937	1	1	0.380302	1	1	0.0504555	0.0943385	0.500671	1	1	1.00275	1.00275	1	0.0537531	1.00275	1	0.761175	0.653575	0.163711	0.0638919	1	1	0.698277	1.00275	0.603588	1	1.00275	1.00275	0.305307	1	0.695712	1.00275	0.243141	1	1.00275	1.00275	1	0.252357	0.0213746	0.261152	1
Cluster_primig-LateSpo	1	1.00764	0.898977	1	1	0.00769649	0.920982	0.507648	0.838015	0.100756	0.733919	1	0.0224869	0.412589	0.0352359	0.853612	0.100756	0.694257	1.00764	1.00764	1	0.109532	1.00764	0.809291	0.338064	0.00231926	0.0571198	0.0671705	1.00003	1	0.997633	1.00764	0.589289	1.00003	1.00764	1.00764	1	1	0.882508	1.00764	0.263096	0.478374	1.00764	1.00764	1	0.477819	0.335587	0.549923	1
Cluster_primig-MidSpo	1	1.00209	0.171407	1	1	0.325194	0.289368	0.176814	0.393369	1	1	1	1	0.479086	0.98344	1	1	1	1.00209	1.00209	1	0.650019	1.00209	1	0.285472	0.0966441	1	0.943118	1	1	0.0643519	1.00209	0.966658	1	1.00209	1.00209	0.241767	1	0.650466	1.00209	1	0.0707575	1.00209	1.00209	1	0.939518	0.224107	0.754282	1
Cluster_Proline	1	1.00044	0.189505	1	1	0.68828	1	1	1	1	1	1	1	1	1	1	1	1	1.00044	1.00044	1	0.9951	1.00044	1	0.204554	0.141782	1	0.920134	1	1	0.896111	1.00044	0.127849	1	1.00044	1.00044	1	1	0.640372	1.00044	1	1	1.00044	1.00044	1	1	0.540899	0.255644	1
Cluster_Proteasome	1	1.00275	0.802325	1	1	0.00204559	0.456564	1	1	1	1	1	1	0.576163	0.968156	1	1	1	1.00275	1.00275	1	0.220695	1.00275	1	1	0.44381	0.956576	0.811759	1	1	0.138177	1.00275	0.988627	1	1.00275	1.00275	1	1	0.508692	1.00275	1	1	1.00275	1.00275	1	1	0.110367	1	1
Cluster_Purine	1	1.00176	0.318008	1	1	0.895864	0.0162682	0.0112093	1	1	0.263689	1	1	0.422533	0.968338	1	1	1	1.00176	1.00176	1	0.975078	1.00176	0.0537053	0.222365	0.129731	0.865537	0.99939	1	1	0.999884	1.00176	0.763792	1	1.00176	1.00176	6.62039e-05	1	0.130457	1.00176	0.460091	1	1.00176	1.00176	1	0.665705	0.816026	0.100396	0.333993
Cluster_PUT3	1	1.00209	0.517639	1	1	0.180527	0.111767	1	1	1	1	1	1	1	0.301999	1	1	0.277765	1.00209	1.00209	1	0.36442	1.00209	1	0.6631	0.0966441	0.0639282	0.11557	1	1	0.625132	1.00209	0.18855	1	1.00209	1.00209	1	1	0.243654	1.00209	0.519075	1	1.00209	1.00209	1	0.939518	0.478874	0.754282	1
Cluster_Pyrimidine	1	1.00154	0.0959289	1	1	0.396629	0.41055	1	1	1	1	1	1	1	0.951233	1	1	0.21314	1.00154	1.00154	1	0.805466	1.00154	1	0.551316	0.215044	0.827171	0.952132	1	1	0.611814	1.00154	0.408544	1	1.00154	1.00154	1	0.0212539	0.39174	1.00154	0.0959592	0.280283	1.00154	1.00154	1	0.873377	0.386874	1	1
Cluster_RAP1	1	1.00088	0.904985	1	1	0.3643	0.184016	1	1	1	0.141856	1	1	1	0.821913	1	1	1	1.00088	1.00088	1	0.392763	1.00088	1	1	0.782797	1	0.106729	1	1	0.748244	1.00088	0.386153	1	1.00088	1.00088	1	1	0.870734	1.00088	1	0.171285	1.00088	1.00088	1	0.692863	0.982235	1	1
Cluster_RCS1	1	1.00077	0.950746	1	1	0.937894	0.518271	1	1	1	1	1	1	1	0.0299309	1	1	1	1.00077	1.00077	1	0.824492	1.00077	0.154244	1	1	0.0395754	0.177838	1	1	0.648148	1.00077	0.714089	1	1.00077	1.00077	1	1	0.833045	1.00077	1	1	1.00077	1.00077	1	0.24766	0.73781	1	1
Cluster_REB1	1	1.00253	0.452805	1	1	0.799204	0.67993	1	1	1	1	1	1	1	0.851602	0.129704	1	1	1.00253	1.00253	1	0.756568	1.00253	1	0.732146	0.584472	0.944172	0.965034	1	1	0.991364	1.00253	0.320606	1	1.00253	1.00253	0.284737	1	0.796398	1.00253	0.587845	0.417602	1.00253	1.00253	1	0.3895	0.58139	0.494399	1
Cluster_RFX1	1	1.00143	0.00447536	1	1	0.710848	0.374039	1	1	1	1	1	1	0.359863	0.47591	1	1	0.199542	1.00143	1.00143	1	0.571928	1.00143	0.267447	1	0.015392	0.804064	0.407764	1	1	0.0536909	1.00143	0.653334	1	1.00143	1.00143	1	1	0.148684	1.00143	0.0115113	1	1.00143	1.00143	1	0.549496	0.13557	0.617111	1
Cluster_RGM1	1	1.00077	0.554921	1	1	0.501078	0.147283	1	1	1	1	1	1	1	0.406559	0.176558	1	1	1.00077	1.00077	1	0.441453	1.00077	1	1	0.737098	0.584124	0.430946	1	1	0.0286753	1.00077	0.714089	1	1.00077	1.00077	0.0968789	1	0.833045	1.00077	1	1	1.00077	1.00077	1	0.644006	0.73781	1	1
Cluster_RGT1	1	1.00209	0.0699127	1	1	0.821745	0.289368	1	1	1	0.304801	1	1	0.479086	0.742945	1	1	1	1.00209	1.00209	1	0.108503	1.00209	0.365559	0.6631	0.425729	0.907736	0.980817	1	1	0.625132	1.00209	0.622928	1	1.00209	1.00209	1	1	0.650466	1.00209	1	1	1.00209	1.00209	1	0.494279	0.224107	0.754282	0.382914
Cluster_RIM101	1	1.00176	0.943638	1	1	0.895864	0.811809	1	0.343507	1	0.0359417	1	1	0.422533	0.00571867	1	1	1	1.00176	1.00176	1	0.460145	1.00176	1	0.599896	0.129731	0.00134502	0.0654391	1	1	0.38036	1.00176	0.942927	1	1.00176	1.00176	1	1	0.130457	1.00176	0.460091	1	1.00176	1.00176	1	1	0.816026	1	1
Cluster_RLM1	1	1.00033	0.731622	1	1	0.87541	1	1	1	1	1	1	1	1	0.476311	1	1	1	1.00033	1.00033	1	0.966263	1.00033	1	1	1	0.313348	0.452532	1	1	0.816988	1.00033	0.415194	1	1.00033	1.00033	1	1	0.53558	1.00033	1	1	1.00033	1.00033	1	1	0.944979	1	1
Cluster_RME1	1	1.00044	0.580464	1	1	0.68828	0.0513408	1	1	1	1	1	1	1	1	1	1	1	1.00044	1.00044	1	0.626776	1.00044	1	1	0.141782	1	0.266494	1	1	0.896111	1.00044	0.510976	1	1.00044	1.00044	1	1	0.640372	1.00044	1	1	1.00044	1.00044	1	1	0.540899	1	1
Cluster_RNAPol	1	1.00418	0.449161	1	1	0.315362	0.527618	1	0.632388	1	0.517068	1	1	1	0.986075	0.0847866	1	1	1.00418	1.00418	1	0.194477	1.00418	0.226341	1	0.667702	0.991532	0.999098	1.00001	1	0.359779	1.00418	0.768565	1.00001	1.00418	1.00418	1	1	0.983231	1.00418	0.769071	1	1.00418	1.00418	1	0.784709	0.353722	0.513874	1
Cluster_ROX1	1	1.00022	0.884319	1	1	1	1	1	1	1	1	1	1	1	0.350279	1	1	1	1.00022	1.00022	1	0.987864	1.00022	0.046724	1	0.0301523	0.221669	0.717339	1	1	0.677629	1.00022	0.300667	1	1.00022	1.00022	1	1	1	1.00022	0.0740954	1	1.00022	1.00022	1	1	0.735485	1	1
Cluster_RPH1	1	1.00099	0.844571	1	1	0.74717	1	1	1	1	1	1	1	1	0.54537	0.221039	1	1	1.00099	1.00099	1	0.932523	1.00099	1	1	0.820556	0.676377	0.422409	1	1	0.824017	1.00099	0.800113	1	1.00099	1.00099	1	1	0.899917	1.00099	0.292886	1	1.00099	1.00099	1	0.355614	0.875122	0.130449	1
Cluster_RPs	1	1.00663	0.62209	1	1	0.554498	0.00509422	1	0.463821	1	0.314751	1	1	0.329494	0.264017	1	1	0.642968	1.00663	1.00663	1	0.338732	1.00663	0.168759	0.854429	0.146597	0.0890693	0.56064	1.00002	1	0.339288	1.00663	0.881463	1.00002	1.00663	1.00663	0.214855	1	0.990026	1.00663	0.667801	0.756629	1.00663	1.00663	1	0.972739	0.0577666	0.62639	1
Cluster_rRNAprocessing	1	1.0033	0.896649	1	1	0.293893	0.0244347	1	1	1	0.00231574	1	1	1	0.539568	1	1	0.401967	1.0033	1.0033	1	0.0299255	1.0033	4.79795e-06	1	0.256491	0.477735	0.71364	1.00001	1	0.284027	1.0033	0.558831	1.00001	1.0033	1.0033	1	1	0.699985	1.0033	1	1	1.0033	1.0033	1	0.988115	0.751591	0.891124	1
Cluster_RTG1	1	1.00253	0.772945	1	1	0.799204	0.67993	1	0.454033	1	0.0695605	1	1	0.545994	0.00708196	0.472106	1	0.325644	1.00253	1.00253	1	0.756568	1.00253	1	0.368534	0.0894514	0.000738164	0.234509	1	1	0.25421	1.00253	0.910207	1	1.00253	1.00253	1	1	0.00661899	1.00253	1	0.0986344	1.00253	1.00253	1	0.628854	0.34428	0.222183	1
Cluster_RTG3	1	1.0011	0.772794	1	1	0.945754	0.647806	1	1	1	1	1	1	1	0.110322	1	1	1	1.0011	1.0011	1	0.696388	1.0011	0.212868	0.435788	0.0791106	0.103882	0.301749	1	1	0.694967	1.0011	0.505276	1	1.0011	1.0011	1	1	0.169959	1.0011	0.0523529	1	1.0011	1.0011	1	1	0.992151	1	0.22427
Cluster_RTS2	1	1.00077	0.816146	1	1	0.774335	1	1	1	1	1	1	1	1	0.779025	1	1	1	1.00077	1.00077	1	0.441453	1.00077	0.154244	1	1	0.584124	0.914016	1	1	0.354336	1.00077	1	1	1.00077	1.00077	1	1	0.833045	1.00077	0.236254	1	1.00077	1.00077	1	1	0.73781	1	1
Cluster_SFL1	1	1.00099	0.633494	1	1	0.980653	0.221844	1	1	1	0.158119	1	1	1	0.0777445	0.0236446	1	1	1.00099	1.00099	1	0.349438	1.00099	1	1	0.820556	0.28721	0.422409	1	1	0.596699	1.00099	1	1	1.00099	1.00099	1	1	0.637264	1.00099	0.292886	1	1.00099	1.00099	1	0.114398	0.250803	0.130449	1
Cluster_SFP1	1	1.00132	0.373646	1	1	0.807262	1	1	1	1	1	1	1	1	0.0646462	0.283312	1	1	1.00132	1.00132	1	0.246067	1.00132	0.249686	1	0.347597	0.159931	0.00161807	1	1	0.422832	1.00132	0.883173	1	1.00132	1.00132	1	1	0.530314	1.00132	0.37008	1	1.00132	1.00132	1	0.829856	0.158113	0.0486203	1
Cluster_SIG1	1	1.00165	0.780352	1	1	0.850223	0.180273	0.142365	1	1	1	1	1	1	0.818622	1	1	1	1.00165	1.00165	1	0.775452	1.00165	1	0.0471672	0.762824	1	0.9927	1	1	0.849702	1.00165	0.730873	1	1.00165	1.00165	1	1	0.884149	1.00165	1	1	1.00165	1.00165	1	0.629901	0.34831	1	1
Cluster_SIP4	1	1.00242	0.187293	1	1	0.143901	0.167547	0.0207428	1	1	1	1	1	0.168635	0.428287	0.457219	1	1	1.00242	1.00242	1	0.0763748	1.00242	0.409593	0.348049	0.547071	0.255773	0.632388	1	1	0.0992482	1.00242	0.723155	1	1.00242	1.00242	1	1	0.973377	1.00242	1	0.403734	1.00242	1.00242	1	0.356421	0.375208	0.803179	1
Cluster_SKN7	1	1.00198	0.757616	1	1	0.761192	0.544511	0.168332	0.377182	1	1	1	1	1	0.979446	1	1	1	1.00198	1.00198	1	0.394483	1.00198	1	0.26441	0.190381	0.895392	0.818706	1	1	0.944089	1.00198	0.81924	1	1.00198	1.00198	1	1	0.202963	1.00198	0.500164	1	1.00198	1.00198	1	0.728868	0.0628095	0.131946	1
Cluster_SKO1	1	1.00121	0.45308	1	1	0.501334	0.298583	1	0.251175	1	1	1	1	1	0.659792	1	1	1	1.00121	1.00121	1	0.995793	1.00121	1	0.467191	0.107821	1	0.649998	1	1	0.555483	1.00121	0.860267	1	1.00121	1.00121	1	1	0.221866	1.00121	1	1	1.00121	1.00121	1	0.802777	0.521607	0.55613	1
Cluster_SMP1	1	1.0011	0.772794	1	1	0.829067	0.260191	1	1	1	1	1	1	1	0.884342	1	1	1	1.0011	1.0011	1	0.911256	1.0011	0.212868	1	0.244541	1	0.543069	1	1	0.970071	1.0011	0.216542	1	1.0011	1.0011	1	1	0.696539	1.0011	1	1	1.0011	1.0011	1	1	0.215057	1	1
Cluster_SOK2	1	1.00088	0.184021	1	1	0.0353122	1	1	1	1	1	1	1	1	1	1	1	1	1.00088	1.00088	1	0.782286	1.00088	1	0.367331	0.417211	1	0.809998	1	1	0.923498	1.00088	0.760937	1	1.00088	1.00088	1	1	0.870734	1.00088	1	1	1.00088	1.00088	1	1	0.292486	0.446009	1
Cluster_sphingolipids	1	1.00088	0.0358795	1	1	0.637856	1	1	1	1	1	1	1	1	0.821913	1	1	1	1.00088	1.00088	1	0.392763	1.00088	1	1	0.782797	1	0.565539	1	1	0.748244	1.00088	0.760937	1	1.00088	1.00088	1	1	0.870734	1.00088	0.265114	1	1.00088	1.00088	1	0.302011	0.681322	1	1
Cluster_SRD1	1	1.00209	0.698693	1	1	0.821745	0.862457	1	1	1	0.304801	1	1	0.479086	0.742945	1	1	1	1.00209	1.00209	1	0.850474	1.00209	0.0731017	0.285472	0.867178	0.391142	0.943118	1	1	0.144564	1.00209	0.842335	1	1.00209	1.00209	1	1	0.650466	1.00209	0.159778	1	1.00209	1.00209	1	0.756467	0.478874	1	1
Cluster_STB1	1	1.00066	0.666874	1	1	0.344623	1	1	1	1	1	1	1	1	0.725815	1	1	1	1.00066	1.00066	1	0.496173	1.00066	1	1	0.280206	0.528571	0.858104	1	1	0.966532	1.00066	1	1	1.00066	1.00066	1	1	1	1.00066	0.206264	1	1.00066	1.00066	1	1	0.397765	1	1
Cluster_STE12	1	1.00143	0.530887	1	1	0.710848	0.742537	1	1	1	1	1	1	1	0.234166	1	1	1	1.00143	1.00143	1	0.834375	1.00143	0.267447	0.524861	0.687681	0.190727	0.625352	1	1	0.52112	1.00143	0.360612	1	1.00143	1.00143	1	1	0.82769	1.00143	1	0.263163	1.00143	1.00143	1	1	0.42863	0.0599646	1
Cluster_Sterols	1	1.00253	0.625019	1	1	0.203484	0.0704843	1	0.454033	1	0.00894223	1	1	1	0.851602	0.472106	0.000541557	0.325644	1.00253	1.00253	1	0.756568	1.00253	0.423584	0.732146	0.369415	0.772305	0.700952	1	1	0.569709	1.00253	0.910207	1	1.00253	1.00253	1	1	0.125972	1.00253	0.0100132	1	1.00253	1.00253	1	0.966521	0.58139	1	0.44262
Cluster_STP1	0.0579513	1.00176	0.98155	1	1	0.228254	0.811809	1	1	1	1	1	1	0.422533	0.00571867	0.358696	1	1	1.00176	1.00176	1	0.460145	1.00176	1	0.599896	0.297669	0.289563	0.157194	1	1	0.961646	1.00176	0.763792	1	1.00176	1.00176	1	1	0.283813	1.00176	0.460091	1	1.00176	1.00176	1	0.665705	0.312874	1	1
Cluster_STP2	1	1.00165	0.780352	1	1	0.501549	1	1	1	1	0.0318385	1	1	0.402354	0.329129	0.340625	1	0.226509	1.00165	1.00165	1	0.775452	1.00165	0.301723	0.5763	0.497467	0.541794	0.401297	1	1	0.295663	1.00165	0.730873	1	1.00165	1.00165	1	1	0.978457	1.00165	0.438868	0.297008	1.00165	1.00165	1	0.629901	0.0996627	0.289672	1
Cluster_SUM1	1	1.00132	0.978744	1	1	0.6142	0.714191	1	1	1	1	1	1	1	0.924894	1	1	0.0168798	1.00132	1.00132	1	0.86186	1.00132	1	0.49685	0.643261	0.777871	0.524927	1	1	0.650235	1.00132	0.31212	1	1.00132	1.00132	1	1	0.790989	1.00132	1	0.030346	1.00132	1.00132	1	0.829856	0.921223	1	1
Cluster_SWI4	1	1.00308	0.881499	1	1	0.173435	0.780609	0.249399	0.521437	1	1	1	1	0.61771	0.997634	1	1	0.0811259	1.00308	1.00308	1	0.627092	1.00308	0.48874	0.466466	0.967228	0.970216	0.728397	1	1	0.995635	1.00308	0.695408	1	1.00308	1.00308	1	1	0.79043	1.00308	0.660181	1	1.00308	1.00308	1	0.984021	0.0762681	0.602143	0.509226
Cluster_SWI5	1	1.00198	0.388251	1	1	0.594472	0.544511	1	0.377182	1	1	1	1	1	0.707472	1	1	1	1.00198	1.00198	1	0.68167	1.00198	0.350166	0.643225	0.190381	0.643523	0.818706	1	1	0.362682	1.00198	0.584464	1	1.00198	1.00198	1	1	0.807283	1.00198	1	1	1.00198	1.00198	1	0.929884	0.250925	1	0.0735582
Cluster_SWI6	1	1.00154	0.83722	1	1	0.789287	0.00881031	1	0.308019	1	1	1	1	0.381472	0.529058	0.322046	1	0.00151918	1.00154	1.00154	1	0.533005	1.00154	0.0419967	1	0.449111	0.503675	0.712116	1	1	0.216131	1.00154	0.918341	1	1.00154	1.00154	1	1	0.642968	1.00154	0.416814	1	1.00154	1.00154	1	0.591173	0.961775	0.262506	1
Cluster_TFs	1	1.00099	0.633494	1	1	0.74717	0.0516176	1	0.210719	1	1	1	1	1	0.856481	0.221039	1	0.142774	1.00099	1.00099	1	0.349438	1.00099	1	1	0.480725	1	0.874975	1	1	0.951921	1.00099	0.447529	1	1.00099	1.00099	1	1	1	1.00099	1	1	1.00099	1.00099	1	0.735019	0.625951	0.130449	1
Cluster_THI2	0.0437768	1.00132	0.926606	1	1	0.980932	1	1	1	1	1	1	1	1	0.924894	1	1	1	1.00132	1.00132	1	0.612305	1.00132	1	1	0.14045	0.777871	0.994121	1	1	0.22091	1.00132	0.883173	1	1.00132	1.00132	0.160318	1	0.111296	1.00132	0.37008	1	1.00132	1.00132	1	1	0.921223	0.208368	1
Cluster_Thiamine	1	1.00033	0.287244	1	1	0.500739	0.26871	0.0302287	1	1	1	1	1	1	1	1	1	1	1.00033	1.00033	1	0.704439	1.00033	1	0.157709	1	1	0.452532	1	1	0.816988	1.00033	1	1	1.00033	1.00033	1	1	1	1.00033	1	1	1.00033	1.00033	1	1	0.630738	1	1
Cluster_tRNAprocessing	1	1.00275	0.802325	1	1	0.501987	0.230966	1	1	1	0.0805045	1	1	0.205516	0.549364	0.500671	1	0.348388	1.00275	1.00275	1	0.866391	1.00275	0.117117	0.408696	0.258599	0.577985	0.235733	1	1	0.386446	1.00275	0.215373	1	1.00275	1.00275	1	1	0.508692	1.00275	0.618459	1	1.00275	1.00275	1	0.975094	0.110367	0.539668	0.470279
Cluster_tRNAsynth	1	1.00264	0.566443	1	1	0.847741	0.702697	0.217956	0.127496	0.0361776	0.36831	1	1	0.561337	0.315985	0.486586	1	1	1.00264	1.00264	1	0.240583	1.00264	0.109382	0.0414015	0.227474	0.144073	0.61712	1	0.00786023	0.947669	1.00264	0.355512	1	1.00264	1.00264	1	1	0.465103	1.00264	0.603447	1	1.00264	1.00264	1	0.971124	0.124582	0.517386	1
Cluster_Tryptophan	1	1.00099	0.360488	1	1	0.980653	0.609044	0.00352211	1	1	1	1	1	1	0.245844	0.221039	1	1	1.00099	1.00099	1	0.349438	1.00099	0.193791	0.0111552	0.820556	0.28721	0.422409	1	1	0.337101	1.00099	0.800113	1	1.00099	1.00099	1	1	0.331101	1.00099	1	0.19053	1.00099	1.00099	1	0.735019	0.625951	1	1
Cluster_UGA3	1	1.00187	0.651727	0.0257534	1	0.315831	0.233663	1	0.360565	1	1	1	1	1	0.42568	1	0.0257534	0.0329137	1.00187	1.00187	1	0.426393	1.00187	0.0599413	0.0649744	0.0597789	0.611737	0.0420145	1	1	0.921223	1.00187	0.299143	1	1.00187	1.00187	1	1	0.555578	1.00187	1	1	1.00187	1.00187	1	0.698658	0.28046	0.715119	1
Cluster_USV1	1	1.00154	0.243818	1	1	0.396629	0.41055	0.133532	1	1	1	1	1	0.381472	0.281036	1	1	1	1.00154	1.00154	1	0.533005	1.00154	0.284789	0.551316	0.727443	0.503675	0.305862	1	1	0.797108	1.00154	0.408544	1	1.00154	1.00154	0.184436	1	0.642968	1.00154	1	1	1.00154	1.00154	1	0.591173	0.386874	0.644388	1
Cluster_Vacuole	0.0125574	1.00507	0.254641	1	1	0.232175	1	1	0.702382	1	1	1	1	0.794297	0.0488764	0.721783	1	0.0427497	1.00507	1.00507	1	0.104328	1.00507	0.668212	0.9285	0.969826	0.461398	0.0090769	1.00001	1	0.760048	1.00507	0.645488	1.00001	1.00507	1.00507	0.488835	1	0.135601	1.00507	1	1	1.00507	1.00507	1	0.170913	0.51193	0.848931	0.321097
Node 1	1	1.00055	0.779967	1	1	0.500924	1	0.0498772	1	1	1	1	1	1	0.659802	1	1	1	1.00055	1.00055	1	0.903208	1.00055	1	0.248799	0.614862	1	0.957553	1	1	1	1.00055	1	1	1.00055	1.00055	1	1	1	1.00055	1	1	1.00055	1.00055	1	0.521767	0.976981	0.308621	1
Node 10	1	1.00088	0.184021	1	1	0.145071	0.566022	1	1	1	0.141856	1	1	1	0.821913	1	1	1	1.00088	1.00088	1	0.392763	1.00088	1	1	0.782797	0.633136	0.565539	1	1	0.481322	1.00088	1	1	1.00088	1.00088	1	1	0.870734	1.00088	1	1	1.00088	1.00088	1	1	0.292486	1	1
Node 11	1	1.00033	0.731622	1	1	0.87541	0.26871	1	1	1	1	1	1	1	1	1	1	1	1.00033	1.00033	1	0.704439	1.00033	1	1	1	1	0.849743	1	1	0.816988	1.00033	0.415194	1	1.00033	1.00033	1	1	0.53558	1.00033	1	1	1.00033	1.00033	1	1	0.944979	1	1
Node 12	1	1.00033	0.287244	1	1	0.500739	0.0274645	1	1	1	1	1	1	1	1	1	1	1	1.00033	1.00033	1	0.704439	1.00033	1	0.157709	0.0799935	1	1	1	1	0.816988	1.00033	0.415194	1	1.00033	1.00033	1	1	0.129655	1.00033	1	1	1.00033	1.00033	1	0.357599	0.630738	1	1
Node 13	0.0293953	1.00088	0.45149	1	1	0.856222	0.184016	1	1	1	0.141856	1	1	1	0.821913	1	1	1	1.00088	1.00088	1	0.782286	1.00088	1	1	0.417211	0.633136	0.809998	1	1	0.22735	1.00088	1	1	1.00088	1.00088	0.109936	1	0.569228	1.00088	1	1	1.00088	1.00088	1	1	0.982235	1	1
Node 14	1	1.00198	0.757616	1	1	0.594472	0.544511	1	1	1	1	1	1	0.460877	0.472751	1	1	1	1.00198	1.00198	1	0.394483	1.00198	1	1	0.96786	0.895392	0.918613	1	1	0.038681	1.00198	0.81924	1	1.00198	1.00198	0.230631	1	0.807283	1.00198	0.500164	0.344897	1.00198	1.00198	1	0.728868	0.51674	0.735423	1
Node 15	1	1.00121	0.867543	1	1	0.72682	0.682728	1	1	1	1	1	1	1	0.659792	0.263126	1	1	1.00121	1.00121	1	0.276587	1.00121	1	0.467191	0.593984	1	0.649998	1	1	0.321871	1.00121	0.558936	1	1.00121	1.00121	0.147994	1	0.940012	1.00121	0.345331	1	1.00121	1.00121	1	0.802777	0.801642	1	1
Node 16	1	1.00022	0.884319	1	1	0.75052	1	1	1	1	1	1	1	1	1	1	1	1	1.00022	1.00022	1	0.987864	1.00022	1	1	1	1	1	1	1	0.677629	1.00022	1	1	1.00022	1.00022	1	1	1	1.00022	1	1	1.00022	1.00022	1	1	0.979739	0.137225	1
Node 17	1	1.00022	0.884319	1	1	0.75052	1	1	1	1	1	1	1	1	0.350279	1	1	1	1.00022	1.00022	1	0.987864	1.00022	1	1	1	1	0.717339	1	1	0.677629	1.00022	1	1	1.00022	1.00022	1	1	1	1.00022	0.0740954	1	1.00022	1.00022	1	1	0.735485	1	1
Node 18
Node 19	1	1.00011	0.659845	1	1	1	1	1	1	1	1	1	1	1	0.193937	1	1	1	1.00011	1.00011	1	0.889789	1.00011	1	1	1	1	0.468316	1	1	1	1.00011	1	1	1.00011	1.00011	1	1	1	1.00011	1	1	1.00011	1.00011	1	0.137135	0.857612	1	1
Node 2	1	1.00253	0.625019	1	1	0.501907	0.187981	0.209894	1	1	0.00894223	1	1	0.545994	0.678355	1	1	1	1.00253	1.00253	1	0.89875	1.00253	1	0.368534	0.584472	0.519528	0.126843	1	1	0.403603	1.00253	0.320606	1	1.00253	1.00253	1	1	0.796398	1.00253	0.587845	1	1.00253	1.00253	1	0.3895	0.14047	0.817215	1
Node 2_fuzzy0.06	1	1.00352	0.598031	1	1	0.572306	0.0907232	0.0417202	0.56934	1	0.0221286	1	1	0.666859	0.429898	1	1	1	1.00352	1.00352	1	0.726221	1.00352	1	0.00754186	0.315422	0.530228	0.106259	1.00001	1	0.273896	1.00352	0.429445	1.00001	1.00352	1.00352	1	1	0.87888	1.00352	0.708819	0.528821	1.00352	1.00352	1	0.656915	0.0460321	0.906112	1
Node 20	1	1.00011	1	1	1	0.500493	1	1	1	1	1	1	1	1	1	1	1	1	1.00011	1.00011	1	0.889789	1.00011	1	1	1	1	1	1	1	1	1.00011	1	1	1.00011	1.00011	1	1	1	1.00011	1	1	1.00011	1.00011	1	1	0.857612	1	1
Node 21	1	1.00022	1	1	1	0.250465	1	1	1	1	1	1	1	1	1	1	1	0.033642	1.00022	1.00022	1	0.791713	1.00022	1	1	1	1	0.717339	1	1	1	1.00022	1	1	1.00022	1.00022	1	1	1	1.00022	1	1	1.00022	1.00022	1	1	0.735485	1	1
Node 22	1	1.00011	0.659845	1	1	0.500493	1	1	1	1	1	1	1	1	1	1	1	1	1.00011	1.00011	1	0.889789	1.00011	1	1	1	1	0.468316	1	1	0.432199	1.00011	1	1	1.00011	1.00011	1	1	1	1.00011	1	1	1.00011	1.00011	1	1	0.857612	1	1
Node 23
Node 24
Node 25	1	1.00011	0.659845	1	1	0.500493	1	1	1	1	1	1	1	1	1	1	1	1	1.00011	1.00011	1	0.889789	1.00011	1	1	1	1	1	1	1	0.432199	1.00011	1	1	1.00011	1.00011	1	1	1	1.00011	1	1	1.00011	1.00011	1	0.137135	0.857612	0.0711393	1
Node 26
Node 27	1	1.00022	0.43537	1	1	1	0.188295	1	1	1	1	1	1	1	1	1	1	1	1.00022	1.00022	1	0.791713	1.00022	1	1	0.317226	1	1	1	1	1	1.00022	1	1	1.00022	1.00022	1	1	0.400272	1.00022	1	1	1.00022	1.00022	1	0.018793	0.735485	1	1
Node 28
Node 29
Node 3	1	1.00055	0.779967	1	1	0.813183	0.406451	1	0.123162	1	1	1	1	1	0.659802	1	1	1	1.00055	1.00055	1	0.557668	1.00055	1	0.248799	0.209869	0.465604	0.440738	1	1	0.374396	1.00055	1	1	1.00055	1.00055	1	1	0.0793854	1.00055	1	1	1.00055	1.00055	1	1	0.849104	0.0437398	1
Node 30	1	1.00022	0.43537	1	1	0.250465	1	1	1	1	1	1	1	1	0.350279	1	1	1	1.00022	1.00022	1	0.791713	1.00022	1	1	1	0.221669	0.717339	1	1	0.677629	1.00022	1	1	1.00022	1.00022	1	1	1	1.00022	1	1	1.00022	1.00022	1	1	0.735485	0.00505357	1
Node 31	1	1.00198	0.388251	1	1	0.24144	0.544511	1	1	1	0.291357	1	1	1	0.472751	1	1	0.265276	1.00198	1.00198	1	0.121973	1.00198	1	0.643225	0.84598	0.643523	0.163871	1	1	0.362682	1.00198	0.159088	1	1.00198	1.00198	1	1	0.383441	1.00198	0.146434	1	1.00198	1.00198	1	0.728868	0.250925	0.735423	1
Node 32	1	1.00187	0.453615	1	1	0.687094	0.233663	1	1	1	1	1	1	1	0.869921	0.376273	1	1	1.00187	1.00187	1	0.426393	1.00187	1	1	0.821749	0.611737	0.395256	1	1	0.465873	1.00187	0.543579	1	1.00187	1.00187	0.219331	1	0.923035	1.00187	0.480513	1	1.00187	1.00187	1	0.418559	0.555984	1	1
Node 33	1	1.00033	0.731622	1	1	0.500739	1	1	1	1	0.0557393	1	1	1	0.476311	1	1	0.0500389	1.00033	1.00033	1	0.966263	1.00033	1	1	1	1	0.452532	1	1	0.0806981	1.00033	1	1	1.00033	1.00033	1	1	1	1.00033	0.109064	1	1.00033	1.00033	1	0.357599	0.630738	1	1
Node 34
Node 35	0.221736	1.00741	0.0135049	1	1	0.314942	0.0635866	1	0.251583	1	0.72347	1	1	1	0.0847598	0.277445	1	0.0267551	1.00741	1.00741	1	0.124994	1.00741	0.799872	0.978655	0.017164	0.260336	0.300468	1.00003	1	0.444484	1.00741	0.547413	1.00003	1.00741	1.00741	0.624147	1	0.674279	1.00741	0.725805	0.793747	1.00741	1.00741	1	0.121194	0.645477	0.101496	1
Node 36
Node 37	1	1.00044	0.580464	1	1	0.68828	0.341167	1	1	1	1	1	1	1	0.577907	1	1	0.0661593	1.00044	1.00044	1	0.626776	1.00044	1	1	0.533863	1	0.266494	1	1	0.896111	1.00044	0.127849	1	1.00044	1.00044	1	1	0.640372	1.00044	0.142715	1	1.00044	1.00044	1	1	0.540899	1	1
Node 38	1	1.00022	0.43537	1	1	0.75052	1	1	1	1	1	1	1	1	0.350279	1	1	1	1.00022	1.00022	1	0.791713	1.00022	1	1	1	1	0.219292	1	1	0.677629	1.00022	1	1	1.00022	1.00022	1	1	1	1.00022	1	1	1.00022	1.00022	1	0.255476	0.735485	1	1
Node 39	1	1.00253	0.452805	1	1	0.340375	0.187981	0.209894	1	1	0.356088	1	1	0.545994	0.279002	0.129704	1	1	1.00253	1.00253	1	0.526838	1.00253	1	0.732146	0.987647	0.519528	0.234509	1	1	0.569709	1.00253	0.0689701	1	1.00253	1.00253	1	1	0.618057	1.00253	0.0540487	1	1.00253	1.00253	1	0.628854	0.34428	0.817215	1
Node 4
Node 40	1	1.00033	0.731622	1	1	0.125329	0.26871	1	1	1	1	1	1	1	1	1	1	1	1.00033	1.00033	1	0.704439	1.00033	1	0.157709	1	1	0.849743	1	1	0.398911	1.00033	1	1	1.00033	1.00033	1	1	0.53558	1.00033	1	1	1.00033	1.00033	1	0.357599	0.944979	1	1
Node 41
Node 42	1	1.00022	0.884319	1	1	0.250465	0.188295	1	1	1	1	1	1	1	1	1	1	1	1.00022	1.00022	1	0.791713	1.00022	1	1	1	1	0.717339	1	1	1	1.00022	1	1	1.00022	1.00022	1	1	1	1.00022	1	1	1.00022	1.00022	1	1	0.735485	0.137225	1
Node 43	1	1.00022	0.43537	1	1	0.250465	1	1	1	1	1	1	1	1	1	1	1	1	1.00022	1.00022	1	0.791713	1.00022	1	1	1	1	0.717339	1	1	1	1.00022	1	1	1.00022	1.00022	1	1	1	1.00022	1	1	1.00022	1.00022	1	1	0.735485	0.137225	1
Node 44	1	1.00396	0.543069	1	1	0.799623	0.282189	1	0.612466	1	0.148142	0.00114565	1	0.709707	0.724986	1	1	0.124049	1.00396	1.00396	1	0.635829	1.00396	1	0.602676	0.00053061	0.813358	0.7845	1.00001	1	0.000398783	1.00396	0.99842	1.00001	1.00396	1.00396	0.408379	1	0.584057	1.00396	1	0.0501997	1.00396	1.00396	1	0.0197893	0.40341	0.736914	1
Node 45
Node 46	1	1.00011	1	1	1	1	0.0990478	1	1	1	1	1	1	1	1	1	1	1	1.00011	1.00011	1	0.889789	1.00011	1	1	1	1	1	1	1	1	1.00011	1	1	1.00011	1.00011	1	1	1	1.00011	1	1	1.00011	1.00011	1	1	0.857612	1	1
Node 47
Node 48	1	1.00022	0.43537	1	1	0.75052	0.188295	1	1	1	1	1	1	1	0.350279	1	1	1	1.00022	1.00022	1	0.791713	1.00022	1	1	0.317226	0.221669	0.717339	1	1	0.186769	1.00022	1	1	1.00022	1.00022	1	1	1	1.00022	1	1	1.00022	1.00022	1	1	0.735485	0.137225	1
Node 49
Node 5	1	1.00033	0.731622	1	1	0.500739	1	1	1	1	1	1	1	1	1	1	1	0.0500389	1.00033	1.00033	1	0.704439	1.00033	1	1	1	1	0.452532	1	1	0.398911	1.00033	0.415194	1	1.00033	1.00033	1	1	0.53558	1.00033	1	1	1.00033	1.00033	1	0.357599	0.630738	1	1
Node 50
Node 51	1	1.00022	0.43537	1	1	0.75052	0.0098007	1	1	1	1	1	1	1	1	1	1	1	1.00022	1.00022	1	1	1.00022	1	1	1	1	1	1	1	1	1.00022	0.300667	1	1.00022	1.00022	1	1	1	1.00022	1	1	1.00022	1.00022	1	0.018793	0.979739	1	1
Node 52	1	1.00011	1	1	1	0.500493	1	1	1	1	1	1	1	1	0.193937	1	1	1	1.00011	1.00011	1	0.889789	1.00011	1	1	1	0.117763	0.468316	1	1	1	1.00011	1	1	1.00011	1.00011	1	1	1	1.00011	1	1	1.00011	1.00011	1	1	1	1	1
Node 53	1	1.00011	0.659845	1	1	0.500493	1	1	1	1	1	1	1	1	0.193937	0.0273613	1	1	1.00011	1.00011	1	0.889789	1.00011	1	1	1	1	0.468316	1	1	1	1.00011	1	1	1.00011	1.00011	1	1	1	1.00011	1	1	1.00011	1.00011	1	1	0.857612	1	1
Node 54
Node 55	1	1.00022	0.43537	1	1	0.250465	1	1	1	1	1	1	1	1	1	1	1	1	1.00022	1.00022	1	0.791713	1.00022	1	1	0.317226	1	1	1	1	1	1.00022	1	1	1.00022	1.00022	1	1	1	1.00022	0.0740954	1	1.00022	1.00022	1	1	0.979739	1	1
Node 56	1	1.00022	0.43537	1	1	0.250465	1	1	1	1	1	1	1	1	1	1	1	1	1.00022	1.00022	1	0.791713	1.00022	1	1	0.317226	1	1	1	1	1	1.00022	1	1	1.00022	1.00022	1	1	1	1.00022	0.0740954	1	1.00022	1.00022	1	1	0.979739	1	1
Node 57	1	1.00033	0.287244	1	1	0.500739	0.26871	1	1	1	1	1	1	1	0.476311	1	1	1	1.00033	1.00033	1	0.966263	1.00033	1	1	1	0.313348	0.452532	1	1	0.398911	1.00033	1	1	1.00033	1.00033	1	1	0.129655	1.00033	1	1	1.00033	1.00033	1	1	0.630738	1	1
Node 58	1	1.00055	0.951323	1	1	0.500924	1	1	0.123162	1	0.0911715	1	1	1	0.659802	1	1	1	1.00055	1.00055	1	0.557668	1.00055	1	1	1	0.465604	0.770457	1	1	0.374396	1.00055	1	1	1.00055	1.00055	1	1	0.31575	1.00055	1	1	1.00055	1.00055	1	0.141548	0.463847	1	1
Node 59	1	1.00055	0.951323	1	1	0.813183	1	1	1	1	0.0911715	1	1	1	1	1	1	1	1.00055	1.00055	1	0.557668	1.00055	1	1	1	1	0.770457	1	1	0.941032	1.00055	1	1	1.00055	1.00055	1	1	0.31575	1.00055	1	1	1.00055	1.00055	1	0.521767	0.463847	1	1
Node 6	1	1.00077	0.554921	1	1	0.937894	0.518271	1	0.168087	1	1	1	1	0.213461	1	1	1	1	1.00077	1.00077	1	0.824492	1.00077	1	0.330055	0.737098	1	1	1	1	0.354336	1.00077	0.32194	1	1.00077	1.00077	1	1	0.833045	1.00077	1	1	1.00077	1.00077	1	0.644006	0.73781	0.403545	1
Node 60	1	1.00011	0.659845	1	1	0.500493	1	1	0.0259385	1	1	1	1	1	1	1	1	1	1.00011	1.00011	1	0.889789	1.00011	1	1	0.173689	1	1	1	1	1	1.00011	1	1	1.00011	1.00011	1	1	0.225566	1.00011	1	1	1.00011	1.00011	1	1	0.857612	0.0711393	1
Node 61	1	1.00033	0.287244	1	1	0.500739	1	1	1	1	1	1	1	1	1	1	1	0.0500389	1.00033	1.00033	1	0.704439	1.00033	1	1	1	1	0.849743	1	1	0.398911	1.00033	1	1	1.00033	1.00033	1	1	0.53558	1.00033	1	1	1.00033	1.00033	1	1	0.630738	1	1
Node 62	1	1.00033	0.287244	1	1	0.500739	0.26871	1	1	1	1	1	1	1	1	1	1	1	1.00033	1.00033	1	0.966263	1.00033	1	1	0.435843	1	0.849743	1	1	1	1.00033	1	1	1.00033	1.00033	1	1	0.53558	1.00033	1	1	1.00033	1.00033	1	1	0.944979	1	1
Node 63	1	1.00066	0.89306	1	1	0.0156918	0.0154014	1	1	1	1	1	1	1	0.329738	1	1	1	1.00066	1.00066	1	0.865143	1.00066	1	1	0.681793	0.150772	0.595163	1	1	0.0578346	1.00066	0.658068	1	1.00066	1.00066	1	1	0.407285	1.00066	1	1	1.00066	1.00066	1	1	0.79426	1	1
Node 64
Node 65	1	1.00044	0.580464	1	1	0.313198	0.341167	1	1	1	1	1	1	1	1	1	1	0.0661593	1.00044	1.00044	1	0.626776	1.00044	1	1	1	1	0.266494	1	1	0.896111	1.00044	0.510976	1	1.00044	1.00044	1	1	1	1.00044	1	1	1.00044	1.00044	1	1	0.540899	1	1
Node 66	1	1.00011	0.659845	1	1	0.500493	1	1	1	1	1	1	1	1	1	1	1	1	1.00011	1.00011	1	0.889789	1.00011	1	1	1	1	1	1	1	0.432199	1.00011	1	1	1.00011	1.00011	1	1	1	1.00011	1	1	1.00011	1.00011	1	1	0.857612	1	1
Node 67	1	1.00275	0.669527	1	1	0.501987	0.7241	1	0.48206	1	1	1	1	0.576163	0.742956	0.500671	1	0.348388	1.00275	1.00275	1	0.220695	1.00275	1	0.408696	0.128911	0.956576	0.684442	1	1	0.386446	1.00275	0.801283	1	1.00275	1.00275	1	1	0.0895652	1.00275	0.618459	0.113547	1.00275	1.00275	1	0.686129	0.721398	0.539668	1
Node 68	1	1.00242	0.336636	1	1	0.143901	0.374041	1	1	1	0.34363	1	1	0.168635	0.642077	1	1	0.313979	1.00242	1.00242	1	0.781295	1.00242	1	0.120313	0.547071	0.936699	0.464735	1	1	0.332154	1.00242	0.896411	1	1.00242	1.00242	1	1	0.0415389	1.00242	1	1	1.00242	1.00242	1	0.825109	0.158192	0.803179	1
Node 69	1	1.00022	0.884319	1	1	0.75052	1	1	1	1	1	1	1	1	1	1	1	1	1.00022	1.00022	1	0.791713	1.00022	1	1	1	1	0.717339	1	1	0.677629	1.00022	1	1	1.00022	1.00022	1	1	1	1.00022	1	1	1.00022	1.00022	1	1	0.735485	1	1
Node 7	1	1.01271	0.000161011	1	1	0.39283	0.00162462	0.690746	0.342891	1	0.36677	1	1	0.744756	0.0427175	0.823802	1	0.12836	1.01271	1.01271	1	0.387821	1.01271	0.756028	0.44966	0.12271	0.0736922	0.167116	1.00008	1	0.699792	1.01271	0.231041	1.00008	1.01271	1.01271	0.811633	0.161297	0.0266895	1.01271	0.987914	0.74674	1.01271	1.01271	1	0.00056833	0.0966138	0.0027583	0.784228
Node 70	1	1.00011	0.659845	1	1	0.500493	1	1	1	1	1	1	1	1	1	1	1	1	1.00011	1.00011	1	0.889789	1.00011	1	1	1	1	1	1	1	0.432199	1.00011	1	1	1.00011	1.00011	1	1	1	1.00011	1	1	1.00011	1.00011	1	1	0.857612	1	1
Node 71	1	1.00033	0.960667	1	1	0.125329	1	1	1	1	1	1	1	1	1	1	0.00459016	0.0500389	1.00033	1.00033	1	0.704439	1.00033	0.0692645	1	1	1	0.452532	1	1	0.816988	1.00033	0.415194	1	1.00033	1.00033	1	1	0.53558	1.00033	1	1	1.00033	1.00033	1	1	0.630738	1	1
Node 72	1	1.0181	0.679273	1	1	0.380074	0.000210788	0.490314	0.406225	1	0.0851176	1	1	0.797268	0.251436	0.93807	0.220473	0.762294	1.0181	1.0181	1	0.0865763	1.0181	0.0140873	0.405823	0.225995	0.0893111	0.0538827	1.00016	1	0.629766	1.0181	0.316367	1.00016	1.0181	1.0181	0.905938	1	0.934542	1.0181	0.406689	0.516368	1.0181	1.0181	1	0.999756	0.00570445	0.358769	0.983808
Node 73	0.741722	1.04137	0.76835	0.426954	1.00002	0.0912876	0.001539	0.70848	0.1347	1	0.03775	1	1	0.542661	0.879646	0.999519	1	0.56529	1.04137	1.04137	1.00002	0.0423134	1.04137	6.48336e-17	0.134498	0.347276	0.218937	0.950681	1.0008	1	0.941949	1.04137	0.539874	1.0008	1.04137	1.04137	0.589508	1	0.974239	1.04137	0.871284	0.839909	1.04137	1.04137	1	0.999999	0.000122673	0.985358	0.998956
Node 74	1	1.00044	0.189505	1	1	0.68828	0.341167	1	1	1	1	1	1	1	0.577907	1	1	1	1.00044	1.00044	1	0.937426	1.00044	1	0.204554	0.533863	1	0.638569	1	1	0.218205	1.00044	1	1	1.00044	1.00044	1	1	1	1.00044	1	1	1.00044	1.00044	1	1	0.540899	1	1
Node 75	1	1.00022	0.43537	1	1	0.250465	1	1	1	1	1	1	1	1	1	1	1	1	1.00022	1.00022	1	0.791713	1.00022	1	1	0.317226	1	0.717339	1	1	1	1.00022	0.300667	1	1.00022	1.00022	1	1	1	1.00022	1	1	1.00022	1.00022	1	1	0.735485	1	1
Node 76	1	1.00055	0.779967	1	1	0.500924	1	1	1	1	1	1	1	1	0.659802	1	1	1	1.00055	1.00055	1	0.557668	1.00055	1	1	1	0.465604	0.957553	1	1	0.374396	1.00055	0.591079	1	1.00055	1.00055	1	1	0.31575	1.00055	1	1	1.00055	1.00055	1	0.521767	0.849104	1	1
Node 77	1	1.00011	0.659845	1	1	0.500493	1	1	1	1	1	1	1	1	1	1	1	1	1.00011	1.00011	1	0.889789	1.00011	0.0236401	1	1	1	0.468316	1	1	1	1.00011	1	1	1.00011	1.00011	1	1	1	1.00011	1	1	1.00011	1.00011	1	1	0.857612	1	1
Node 78	1	1.00022	0.884319	1	1	1	1	1	1	1	1	1	1	1	1	1	1	1	1.00022	1.00022	1	0.791713	1.00022	1	1	1	1	0.717339	1	1	0.186769	1.00022	1	1	1.00022	1.00022	1	1	0.400272	1.00022	1	1	1.00022	1.00022	1	1	0.735485	1	1
Node 79
Node 8	1	1.00452	0.32157	1	1	0.106155	0.923941	0.343202	0.0894899	1	0.00728386	1	1	0.755623	0.555103	0.680174	1	0.504924	1.00452	1.00452	1	0.323699	1.00452	1	0.400752	0.584404	0.351637	0.461401	1.00001	1	0.757117	1.00452	0.0275177	1.00001	1.00452	1.00452	1	1	0.310384	1.00452	1	0.618882	1.00452	1.00452	1	0.191854	0.055587	0.0679662	0.647601
Node 80	1	1.00099	0.360488	1	1	0.501213	0.0516176	0.0880002	1	1	1	1	1	1	0.54537	1	1	1	1.00099	1.00099	1	0.739361	1.00099	1	0.000950782	0.054796	0.676377	0.422409	1	1	0.337101	1.00099	0.171337	1	1.00099	1.00099	1	1	0.899917	1.00099	1	1	1.00099	1.00099	1	0.355614	0.250803	0.130449	0.204308
Node 81	1	1.00055	0.447461	1	1	0.813183	0.406451	0.0498772	1	1	0.0911715	1	1	1	0.0533201	1	1	1	1.00055	1.00055	1	0.903208	1.00055	1	0.248799	0.209869	0.108766	0.150332	1	1	0.374396	1.00055	0.190564	1	1.00055	1.00055	1	1	1	1.00055	1	0.110775	1.00055	1.00055	1	1	0.463847	1	0.119213
Node 82	1	1.00077	0.816146	1	1	0.774335	1	1	0.168087	1	1	1	1	1	1	1	1	1	1.00077	1.00077	1	0.824492	1.00077	1	1	0.34996	1	0.914016	1	1	0.648148	1.00077	1	1	1.00077	1.00077	1	1	0.833045	1.00077	0.236254	0.151585	1.00077	1.00077	1	1	0.73781	1	1
Node 83	1	1.00011	0.659845	1	1	1	1	1	1	1	1	1	1	1	1	1	1	1	1.00011	1.00011	1	0.889789	1.00011	1	1	0.173689	1	0.468316	1	1	0.432199	1.00011	1	1	1.00011	1.00011	1	1	0.225566	1.00011	1	1	1.00011	1.00011	1	1	0.857612	1	1
Node 84	1	1.00022	0.43537	1	1	0.250465	1	1	1	1	1	1	1	1	0.350279	0.0539768	1	1	1.00022	1.00022	1	0.987864	1.00022	1	1	0.317226	0.221669	0.717339	1	1	0.677629	1.00022	1	1	1.00022	1.00022	1	1	0.400272	1.00022	1	1	1.00022	1.00022	1	1	0.735485	0.137225	1
Node 85	1	1.00143	0.303761	1	1	0.501445	0.0330079	1	0.289565	1	1	1	1	1	0.47591	0.302947	0.0197498	1	1.00143	1.00143	1	0.834375	1.00143	0.267447	1	0.015392	0.804064	0.810574	1	1	0.308162	1.00143	1	1	1.00143	1.00143	1	1	0.82769	1.00143	1	1	1.00143	1.00143	1	1	0.720753	1	1
Node 86
Node 87	1	1.00044	0.580464	1	1	0.313198	0.341167	1	1	1	0.0736238	1	1	1	1	1	1	1	1.00044	1.00044	1	0.9951	1.00044	1	1	0.141782	1	1	1	1	0.579617	1.00044	1	1	1.00044	1.00044	1	1	0.221204	1.00044	1	1	1.00044	1.00044	1	1	0.540899	1	1
Node 88	1	1.00022	0.884319	1	1	0.75052	0.188295	1	0.0512069	1	1	1	1	1	0.350279	1	1	1	1.00022	1.00022	1	0.791713	1.00022	1	1	1	0.221669	0.219292	1	1	0.677629	1.00022	1	1	1.00022	1.00022	1	1	1	1.00022	1	1	1.00022	1.00022	1	0.255476	0.735485	0.137225	1
Node 89	1	1.00044	0.986629	1	1	0.937787	0.341167	1	1	1	0.0736238	1	1	1	0.577907	1	1	1	1.00044	1.00044	1	0.626776	1.00044	1	1	0.533863	0.394236	0.266494	1	1	0.896111	1.00044	1	1	1.00044	1.00044	1	1	0.640372	1.00044	1	1	1.00044	1.00044	1	1	0.900255	1	1
Node 9	1	1.00099	0.133602	1	1	0.0902215	0.221844	1	1	1	1	1	1	0.265636	0.54537	1	1	1	1.00099	1.00099	1	0.349438	1.00099	1	1	0.820556	0.676377	0.195507	1	1	0.337101	1.00099	0.800113	1	1.00099	1.00099	1	1	0.899917	1.00099	1	1	1.00099	1.00099	1	1	0.250803	1	1
Node 90	1	1.00011	0.659845	1	1	0.500493	1	1	1	1	1	1	1	1	1	1	1	1	1.00011	1.00011	1	0.889789	1.00011	1	1	1	1	0.468316	1	1	0.432199	1.00011	1	1	1.00011	1.00011	1	1	1	1.00011	1	1	1.00011	1.00011	1	1	0.857612	1	1
[truncated: 41 more columns]
