# Supplementary material for: Conservation and Evolution of Cis-Regulatory Systems in Ascomycete Fungi
Source: PLoS Biol. 2004 Nov 9;2(12):e398. doi: 10.1371/journal.pbio.0020398 (PMC526180; doi:10.1371/journal.pbio.0020398)
Supplement: Dataset S32 — (389 KB XLS). [file pbio.0020398.sd032.xls]

## Sheet: Sheet1
UID	ABF1	ACE2	ADR1	AFT1	ARO80	ASH1	AZF1	BAS1	CAD1/YAP2	CAT8	CBF1	CHA4	CRZ1	CUP2	DAL80	ECM22	FKH1	FLO8	FZF1	GAL4	GAT1	GATGAG1	GATGAG2	GCN4	GCR1	GLN3	GZF3	HAC1	HAP1	HAP4	HCM1	HSF1	IME1	INO2/4	LEU3	LYS14	MAC1	MAL63	MATALPHA	MCB	MCM1	MCM1-2	MCM1-3	MET30/31	MIG1	MOT3	MSN2/4	MTsite1	MTsite2
Cluster_ABF1	0.543263	1.00452	0.525725	0.299931	1	0.461523	0.280819	0.980189	0.592054	0.602965	0.524797	1	1	0.750204	0.946752	0.0262829	0.936099	1	1	1	0.152308	0.0555146	0.230382	0.331966	0.605632	0.927328	0.653826	1	1	0.0720235	0.145895	0.121607	1	1	1	0.450066	1	0.806038	1.00452	0.789692	0.7091	1.00452	1.00452	1	0.992055	0.324286	0.199813	0.306251	0.863987
Cluster_ACE2	0.680876	1.00176	0.636505	1	1	0.999529	0.341914	0.900469	0.0549297	1	1	1	1	0.29316	0.994247	0.492573	0.529537	1	1	1	0.967705	1	0.063222	0.753145	0.218708	0.997728	0.944327	1	1	0.796774	1	0.942927	1	1	1	1	1	0.460595	1.00176	0.813631	0.563756	1.00176	1.00176	1	0.597388	0.943729	0.099118	1	1
Cluster_ADR1	0.723375	1.00198	0.787007	1	1	0.434311	0.485841	0.925429	0.78301	1	0.176447	0.477143	0.271149	0.814543	0.682902	0.533868	0.0712524	1	1	0.131118	0.438186	1	0.685498	0.834699	0.750572	0.828107	0.89922	0.141421	1	0.498332	1	0.81924	1	1	1	1	0.148489	0.469703	1.00198	0.848965	0.0124507	1.00198	1.00198	1	0.382521	0.734097	0.871367	0.7972	0.583023
Cluster_ARG80	0.122662	1.00198	0.787007	1	1	0.434311	0.676943	0.442021	0.99857	1	0.176447	1	0.271149	0.814543	0.173023	0.0363628	0.837555	1	1	1	0.438186	1	0.446803	0.463958	0.112954	0.0752943	0.777415	1	1	0.124915	1	0.81924	1	1	1	1	1	0.469703	1.00198	1	0.144081	1.00198	1.00198	0.415131	0.949586	0.924425	0.530326	0.550843	1
Cluster_ARG81	0.680876	1.00176	0.348676	0.535322	1	0.889784	0.543011	0.365532	0.661218	1	0.028188	0.438045	0.245056	0.9095	0.491451	0.492573	0.529537	1	1	1	0.480297	1	0.167045	0.338647	0.587399	0.329574	0.694374	1	1	0.0580542	1	1	1	1	1	1	1	0.655016	1.00176	1	0.276593	1.00176	1.00176	0.0785201	0.775057	0.943729	0.398512	0.739285	1
Cluster_Arginine	0.0668881	1.00154	0.893868	1	1	0.64291	0.205172	0.107132	0.143847	1	0.0195061	1	0.218036	0.863623	0.479008	0.112479	0.716773	1	1	1	0.977576	1	0.261227	0.2182	0.385102	0.35167	0.792679	1	1	0.988343	1	0.694132	1	1	1	1	1	0.930889	1.00154	0.770041	0.0677657	1.00154	1.00154	0.0618502	0.418218	0.817931	0.472781	1	1
Cluster_ARO80	0.17253	1.00121	0	0.0906734	1	0	0	0.0488458	0.0276653	0.0980832	1	0.0555026	1	0.228834	0.00959266	1	0.00514083	1	1	1	0	1	0.00850733	0.0775942	0	0.0372635	0	1	1	0	1	0.00417814	1	1	1	1	1	0	1.00121	0.300916	0.366005	1.00121	1.00121	0.039589	0.00171901	0	0.0994331	0.532063	1
Cluster_ARO80	0.17253	1.00121	0	0.0906734	1	0	0	0.0488458	0.0276653	0.0980832	1	0.0555026	1	0.228834	0.00959266	1	0.00514083	1	1	1	0	1	0.00850733	0.0775942	0	0.0372635	0	1	1	0	1	0.00417814	1	1	1	1	1	0	1.00121	0.300916	0.366005	1.00121	1.00121	0.039589	0.00171901	0	0.0994331	0.532063	1
Cluster_ASH1	1	1.00165	0.384654	0.512502	1	0.340896	0.4676	0.885015	0.0317086	1	0.478685	1	1	1	0.587291	1	0.0967464	1	1	1	0.856865	1	1	0.99523	0.48916	0.644439	0.961098	1	1	0.937709	0.055985	0.455312	1	1	1	1	0.441736	0.956011	1.00165	0.792979	0.527861	1.00165	1.00165	1	0.312472	0.797248	0.751465	0.705342	1
Cluster_Asparagine	0.0135466	1.00033	0.65001	1	1	1	1	0.0491531	1	1	1	1	1	1	0.541906	1	0.0771875	1	1	1	0.994181	1	0.0927358	0.215407	1	1	0.863625	1	1	0.837985	1	0.0716138	1	1	1	1	1	1	1.00033	0.0277581	1	1.00033	1.00033	1	0.0841179	0.991017	0.238239	1	1
Cluster_Autophagy	0.434943	1.00088	0.708739	0.050601	1	0.457743	0.595292	0.292647	0.0476787	0.330639	0.293391	1	1	0.874344	0.0491458	1	1	1	1	1	0.953209	1	0.461081	0.743933	0.355704	0.716588	0.413654	1	1	0.970327	1	1	1	1	1	1	1	0.676335	1.00088	1	1	1.00088	1.00088	1	0.928258	0.930394	0.777638	0.743636	1
Cluster_AZF1	0.680876	1.00176	0.843883	1	1	0.11027	0.078616	0.900469	0.661218	0.182865	0.146076	1	1	0.513894	0.300888	0.492573	0.285029	1	1	1	0.480297	1	0.832272	0.338647	0.0998905	0.173596	0.472203	1	0.193663	0.184413	1	0.763792	1	1	1	1	0.463033	0.91974	1.00176	0.813631	0.102649	1.00176	1.00176	1	0.597388	0.398622	0.398512	0.739285	0.540421
Cluster_BAS1	1	1.00154	0.714285	0.137022	1	0.64291	0.205172	0.00111619	0.143847	1	0.116979	0.396033	1	0.401508	0.128741	0.447629	0.927016	1	1	1	0.977576	1	0.105307	0.0310877	0.780543	0.0739112	0.336192	1	1	0.879273	1	0.918341	0.0152245	1	1	1	1	0.930889	1.00154	0.770041	1	1.00154	1.00154	0.341033	0.629357	0.960294	0.12039	0.907715	1
Cluster_Biotin	0.192652	1.00033	0.951152	1	1	0.482168	0.737592	0.00241068	1	1	1	1	1	1	0.541906	1	0.0771875	1	1	1	0.871619	1	0.464706	0.0268584	0.494828	1	0.453092	1	1	0.837985	1	1	1	0.00295243	1	1	1	0.527653	1.00033	1	1	1.00033	1.00033	1	0.822748	0.841705	1	1	1
Cluster_CAD1	1	1.00121	0.556098	1	1	0.277529	0.357365	1	0.695815	1	1	1	0.175692	0.00437797	0.153309	1	1	1	1	1	0.604087	1	0.641355	0.980138	0.108759	0.510417	0.512384	1	1	0.699194	1	1	1	1	1	0.147994	1	0.317381	1.00121	1	0.739095	1.00121	1.00121	0.279387	0.153717	0.531451	0.481389	0.0188242	0.0928768
Cluster_CBF1	0.224048	1.00143	0.752767	0.121034	1	0.444509	0.0540242	0.248834	0.825306	1	0.103054	1	0.0206975	0.833397	0.970438	1	0.386323	1	1	1	0.981788	1	0.933445	0.578097	0.861259	0.858826	0.64476	1	1	0.567078	1	0.360612	1	1	1	1	1	0.338389	1.00143	1	0.450301	1.00143	1.00143	1	0.967561	0.473708	0.833165	0.626448	1
Cluster_CHA4	0.379922	1.00209	0.991236	0.221971	1	0.388101	0.36797	0.744966	0.829888	0.614798	0.191979	0.0278663	1	0.660909	0.982194	0.553242	0.211953	1	1	1	0.791945	1	0.721836	0.716585	0.171546	0.947021	0.734224	1	0.225592	0.648393	1	0.966658	1	1	1	0.241767	0.522186	0.384128	1.00209	0.864037	0.375652	1.00209	1.00209	1	0.906471	0.913822	0.59158	0.821648	1
Cluster_CIN5	0.380002	1.00352	0.0100245	0.784371	1	0.0627098	0.494807	0.822719	0.380872	0.799691	0.396788	0.313283	0.430344	0.619547	0.416468	0.74283	0.470256	1	1	1	0.829152	0.258882	0.574464	0.9487	0.554583	0.125661	0.528227	1	1	0.0613429	1	0.792569	1	1	1	1	0.032077	0.51358	1.00352	1	0.154428	1.00352	1.00352	0.614913	0.297541	0.158636	0.844172	0.384465	0.191998
Cluster_CRZ1	0.224048	1.00143	0.752767	0.463454	1	0.957683	0.310265	0.248834	0.0072276	1	0.103054	0.373867	1	0.154641	0.18216	1	0.676634	1	1	1	0.551151	1	0.933445	0.344272	0.700881	0.472065	0.389635	1	1	0.317192	1	0.902326	1	1	1	1	1	0.338389	1.00143	0.376724	0.18113	1.00143	1.00143	1	0.89228	0.473708	0.833165	0.332428	1
Cluster_CUP9	1	1.00121	0.826498	1	1	0.932831	0.818258	0.795214	0.968315	0.424238	1	1	1	0.475925	0.996567	0.372662	1	1	1	1	0.988771	1	0.641355	0.886557	0.717876	0.976133	0.995188	1	1	0.699194	1	0.558936	1	1	1	1	1	0.765736	1.00121	1	0.123759	1.00121	1.00121	1	0.786681	0.979623	1	0.24076	0.0928768
Cluster_DAL81	0.575327	1.00132	0.509247	0.437114	1	0.232457	0.445109	0.822725	0.76758	1	1	1	1	0.797237	0.686108	1	0.335863	1	1	1	0.577014	1	0.918008	0.506151	0.923746	0.932099	0.704007	1	1	0.940638	1	0.6083	1	1	1	1	0.372656	0.661784	1.00132	0.10971	0.00785639	1.00132	1.00132	1	0.950189	0.501751	0.323425	0.28631	0.441752
Cluster_DAL82	0.138604	1.00209	0.256773	1	1	0.788818	0.102798	1	0.975533	1	0.191979	0.495663	1	0.660909	0.250988	0.00688115	0.410446	1	1	1	0.949352	1	0.278462	0.953547	0.989667	0.739437	0.734224	1	1	0.967565	1	0.622928	1	1	1	0.241767	0.522186	0.564786	1.00209	0.292314	0.166884	1.00209	1.00209	0.43232	0.906471	0.712953	0.0163955	0.345235	0.602822
Cluster_DIG1	0.631859	1.00154	0.714285	0.137022	1	0.161152	0.801479	0.578482	0.0163256	0.504774	0.455529	1	1	0.973516	0.684088	0.112479	0.0745575	1	1	1	0.526445	1	0.261227	0.414312	0.0269514	0.35167	0.792679	1	1	0.0161344	1	0.694132	1	1	1	1	1	0.826498	1.00154	0.156842	0.212047	1.00154	1.00154	1	0.101634	0.44723	0.12039	0.907715	1
Cluster_DOT6	0.705019	1.00385	0.488845	0.491727	1	0.663413	0.64429	0.514219	0.0270898	0.516481	0.781646	1	1	0.717816	0.365836	0.42943	0.563535	1	1	1	0.200706	1	0.198618	0.0718525	0.352299	0.0880853	0.145465	0.256777	1	0.446313	1	0.345891	1	1	1	0.399673	0.147142	0.453107	1.00385	0.129382	0.923069	1.00385	1.00385	0.64793	0.0782333	0.410635	0.908861	0.92776	1
Cluster_DrugResistance	1	1.00088	0.708739	0.318209	1	0.761162	0.595292	0.684343	0.0476787	0.330639	1	1	1	0.874344	0.0491458	1	0.407017	1	1	1	0.693149	1	0.461081	0.743933	0.355704	0.0108859	0.413654	1	1	0.354358	1	0.129302	1	1	1	1	1	0.169975	1.00088	0.568127	1	1.00088	1.00088	0.211997	0.0777967	0.631496	0.492197	0.743636	1
Cluster_Endocytosis	1	1.00165	0.384654	1	1	0.340896	0.677198	0.885015	0.205039	0.16507	0.478685	1	1	0.2442	0.0291365	0.470576	0.752631	1	1	1	0.856865	1	0.134601	0.483003	0.294051	0.118161	0.288303	1	1	0.22232	1	1	1	1	1	1	0.441736	0.35595	1.00165	1	0.840004	1.00165	1.00165	1	0.86041	0.422228	0.331033	0.92217	1
Cluster_FattyAcid	0.819864	1.00264	0.149656	0.683405	1	0.206363	0.00215352	0.85171	0.957314	0.700421	0.647522	1	1	0.669911	0.902964	0.638704	0.801908	1	1	1	0.332699	1	0.85628	0.609766	0.838393	0.847946	0.504934	1	1	0.228776	1	0.777559	1	1	1	0.295097	0.606686	0.947123	1.00264	0.43314	1	1.00264	1.00264	1	0.0202724	0.609329	0.341148	0.908318	1
Cluster_FHL1	0.438848	1.00541	0.889019	1	1	0.240053	0.734322	0.805215	0.000243547	0.217065	3.15889e-05	1	1	0.710187	0.833244	0.609268	0.752606	1	1	1	0.348735	1	0.840385	0.39125	0.36894	0.481474	0.165747	1	0.138941	0.260654	1	0.835607	1	1	1	1	0.286309	0.920187	1.00541	0.546956	0.678175	1.00541	1.00541	0.42355	0.97948	0.0594889	0.732202	0.507547	1
Cluster_FKH1	0.473876	1.00099	0.656336	0.3501	1	0.892114	0.415616	0.345208	0.508948	0.363414	0.0531329	1	0.146205	0.644643	0.934817	1	0.814032	1	1	1	0.941586	1	0.0705558	0.26924	0.739366	0.796663	0.993278	1	0.113996	0.28808	1	0.800113	1	1	1	1	0.295056	0.781145	1.00099	0.223727	1	1.00099	1.00099	1	0.611076	0.913729	0.833303	0.783765	0.35412
Cluster_FKH2	0.80651	1.00253	0.629321	0.667843	0.0983817	0.897159	0.035305	0.613193	0.155152	1	1	1	1	0.132973	0.865473	0.246876	0.00986502	1	1	1	0.996977	1	0.254204	0.379953	0.649055	0.669338	0.99175	1	1	0.264331	1	0.983722	1	1	1	1	1	0.924111	1.00253	0.190585	0.0411962	1.00253	1.00253	1	0.592685	0.865897	0.453493	0.894982	1
Cluster_Flavin	0.300022	1.00055	0.487712	1	1	0.296437	0.892479	1	0.0844183	1	1	0.164725	1	0.0819113	0.552333	1	1	1	1	1	0.981732	1	1	0.83147	1	0.344826	0.914689	1	1	0.891073	1	0.591079	1	1	1	1	1	0.534554	1.00055	1	0.0126541	1.00055	1.00055	1	0.119681	0.750331	0.507275	0.572829	1
Cluster_Flocculation	1	1.00022	0.75039	1	1	0.953438	0.5901	1	0.157288	1	1	0.0694556	1	0.404502	0.777209	0.00171621	0.311789	1	1	1	0.912473	1	1	0.509395	0.746568	1	0.946235	1	1	0.934936	1	1	1	1	1	1	1	0.768129	1.00022	1	1	1.00022	1.00022	1	1	0.891476	0.100713	0.288349	1
Cluster_FZF1	0.631859	1.00154	0.893868	1	1	0.64291	0.607332	0.578482	0.503712	1	1	1	0.218036	0.197685	0.844464	0.447629	0.716773	1	1	0.103531	0.526445	1	0.506171	0.643611	0.204289	0.898446	0.336192	0.111807	1	0.0936452	1	0.694132	1	1	1	1	0.0973846	0.254568	1.00154	0.156842	0.49001	1.00154	1.00154	1	0.80975	0.817931	0.472781	0.378413	0.493478
Cluster_GAL4	1	1.00099	0	1	1	0	0	1	0.508948	1	1	1	1	0.127502	0	1	5.35338e-06	1	1	1	0	1	0.0705558	0.803334	0.0185368	0.00503951	0	1	1	0	1	1	1	1	1	0.0069776	1	0	1.00099	1	0.000140287	1.00099	1.00099	1	0	0	1	0.0389007	1
Cluster_GAL4	1	1.00099	0	1	1	0	0	1	0.508948	1	1	1	1	0.127502	0	1	5.35338e-06	1	1	1	0	1	0.0705558	0.803334	0.0185368	0.00503951	0	1	1	0	1	1	1	1	1	0.0069776	1	0	1.00099	1	0.000140287	1.00099	1.00099	1	0	0	1	0.0389007	1
Cluster_Galactose	0.300022	1.00055	0.487712	1	1	0.704601	0.250444	1	0.657247	1	1	0.164725	1	0.726413	0.84557	1	0.203456	1	1	1	0.795304	1	0.647143	1	0.808229	0.689643	0.670925	1	1	0.98317	1	0.591079	1	1	1	1	1	0.83477	1.00055	1	0.456928	1.00055	1.00055	1	0.725871	0.750331	0.851871	1	1
Cluster_GAT1	1	1.00198	0.97486	1	1	0.2203	0.159595	1	0.424838	1	1	0.477143	1	0.615425	0.922378	0.533868	0.368658	1	1	1	0.808514	1	0.685498	0.834699	0.395695	0.676317	0.89922	1	1	0.498332	1	0.159088	1	1	1	0.230631	1	0.98973	1.00198	0.848965	0.889143	1.00198	1.00198	1	0.569024	0.734097	0.871367	0.95332	0.583023
Cluster_GAT3	1	1.00055	0.864392	1	1	0.929257	0.590202	1	1	1	0.19508	1	1	0.726413	0.84557	0.19093	0.607147	1	1	1	0.795304	1	1	1	0.808229	0.689643	0.914689	1	1	0.229234	1	1	1	1	1	1	1	0.83477	1.00055	1	1	1.00055	1.00055	1	1	0.750331	0.851871	0.572829	1
Cluster_GCN4	0.542885	1.00286	0.119602	1	1	0.310254	0.00215058	0.00027149	0.0197194	1	0.0961321	0.233877	0.366858	0.226208	0.137394	0.668133	0.950947	1	1	1	0.891639	1	0.203573	0.00295585	0.40854	0.0715814	0.601828	1	1	0.491071	1	0.990494	1	1	1	1	0.260515	0.65024	1.00286	0.934886	0.0239612	1.00286	1.00286	0.176398	0.976164	0.825232	0.293207	0.211511	1
Cluster_GCR1	1	1.00088	0.708739	1	1	0.457743	0.314665	1	0	0.330639	0.293391	1	1	0.085881	0.0491458	1	1	1	1	1	0.693149	1	0.81119	0.942132	0.995885	0.060148	0.121025	1	1	0.970327	1	0.760937	1	1	1	1	0.267118	0.404264	1.00088	0.568127	0.623558	1.00088	1.00088	1	0.238245	0.631496	0.777638	1	1
Cluster_GCR2	0.224048	1.00143	0.978404	0.463454	1	0.444509	0.146159	0.846543	0.0072276	0.479262	1	1	1	0.0542702	0.581548	1	0.911998	1	1	1	0.887368	1	0.453683	0.578097	0.28178	0.858826	0.64476	1	1	0.317192	1	0.653334	1	1	1	1	1	0.338389	1.00143	1	0.795681	1.00143	1.00143	1	0.745324	0.838268	0.203106	0.626448	0.468242
Cluster_GeneralTFs	0.175124	1.00352	0.873663	1	0.134251	0.446675	0.639599	1	0.662854	0.799691	1	1	0.430344	0.619547	0.556834	1	0.081347	1	1	1	0.947089	1	0.13172	0.502772	0.284487	0.739007	0.528227	1	1	0.255826	1	0.976383	1	1	1	1	0.032077	0.964826	1.00352	0.965374	0.896731	1.00352	1.00352	1	0.571035	0.89951	0.844172	0.995714	1
Cluster_GLN3	0.832297	1.00275	0.892966	0.698239	1	0.929073	0.261309	0.670936	0.561862	1	0.287347	1	1	0.0409466	0.302314	0.65373	0.824326	1	1	1	0.901017	1	0.519201	0.805542	0.777924	0.323369	0.794698	1	1	0.537383	1	0.988627	1	1	1	1	1	0.838	1.00275	0.727042	0.95293	1.00275	1.00275	1	0.265243	0.589344	0.853444	0.564521	1
Cluster_Glutamate	0.248248	1.00044	0.563048	1	1	0.794463	0.832023	0.43809	0.518985	1	1	1	1	0.645428	0.728275	1	1	1	1	1	0.83259	1	1	0.347499	0.9358	0.883474	0.95882	1	1	0.72964	1	0.510976	1	1	1	1	1	0.946261	1.00044	1	0.386382	1.00044	1.00044	1	0.589646	0.794708	0.379077	0.493593	0.176532
Cluster_Glutathione	0.348236	1.00066	0.96512	1	1	0.880793	0.93118	1	0.174497	1	1	1	0.0999985	0.788908	0.988958	1	0.674128	1	1	1	0.998391	1	1	1	0.983744	0.960241	0.971198	1	1	0.959691	1	1	1	1	1	1	1	0.907046	1.00066	1	1	1.00066	1.00066	1	0.821528	0.996954	0.898912	0.238604	1
Cluster_Glycerol	1	1.00055	0.864392	1	1	0.929257	0.590202	1	0.657247	1	1	1	1	0.321488	0.84557	0.19093	0.607147	1	1	1	0.795304	1	0.238372	0.83147	0.493535	0.689643	0.670925	1	1	0.622018	1	0.190564	1	1	1	1	0.176506	0.83477	1.00055	0.408252	0.456928	1.00055	1.00055	1	0.385308	0.750331	0.18678	1	1
Cluster_Glycogen	0.0411525	1.00055	0.487712	1	1	0.991043	0.250444	0.00144114	0.657247	0.221863	1	1	1	0.321488	0.84557	1	0.203456	1	1	1	0.981732	1	1	0.0305736	0.183152	0.931932	0.670925	1	0.0650162	0.622018	1	0.591079	1	1	1	1	1	0.83477	1.00055	1	1	1.00055	1.00055	0.00808364	0.119681	0.750331	0.507275	1	1
Cluster_GTS1	0.138604	1.00209	0.256773	1	1	0.607598	0.36797	0.744966	0.975533	0.614798	0.561893	0.495663	1	0.253103	0.127544	0.553242	0.859383	1	1	1	0.791945	0.162854	0.278462	0.716585	0.665354	0.113325	0.148184	1	1	0.102099	1	1	1	1	1	1	0.522186	0.732567	1.00209	0.00163404	0.659381	1.00209	1.00209	1	0.645225	0.712953	0.59158	0.164201	0.226633
Cluster_HAL9	1	1.00154	0.893868	1	1	0.390399	0.029183	0.867163	0.503712	0.147609	1	1	1	0.863623	0.684088	0.112479	0.435801	1	1	1	0.872334	1	0.770528	0.643611	0.780543	0.898446	0.585592	1	0.171656	0.26643	1	0.408544	1	1	1	1	0.419596	0.254568	1.00154	1	0.212047	1.00154	1.00154	1	0.80975	0.817931	0.87056	0.907715	1
Cluster_HAP2	0.657241	1.00165	0.675388	0.512502	1	0.340896	0.4676	0.885015	0.0317086	1	0.13134	1	1	0.700373	0.962508	0.126366	0.483692	1	1	1	0.856865	1	0.555896	0.964565	0.686983	0.979592	0.288303	1	1	0.669555	1	1	1	1	1	1	1	0.35595	1.00165	0.792979	0.840004	1.00165	1.00165	1	0.86041	0.952367	0.331033	0.705342	0.517519
Cluster_HAP3	0.404892	1.0022	0.231115	0.0640312	1	0.880038	0.435105	0.514638	0.572049	1	0.207679	1	1	0.296868	0.512248	0.571812	0.451618	1	1	1	0.775236	1	0.534981	0.582053	0.738467	0.461264	0.689191	1	1	0.769614	0.0739608	0.862719	1	1	1	1	0.540423	0.170072	1.0022	0.877607	0.687283	1.0022	1.0022	1	0.713	0.902631	0.150434	0.38342	0.621684
Cluster_HAP4	0.379922	1.00209	0.756689	0.221971	1	0.188837	0.554599	0.744966	0.829888	1	0.000954933	1	1	0.952032	0.41665	0.0418906	0.211953	1	1	0.137883	0.418533	1	0.897046	0.716585	0.0295709	0.226315	0.539989	1	1	0.102099	1	0.966658	1	1	1	1	0.522186	0.225043	1.00209	0.864037	0.0585684	1.00209	1.00209	1	0.906471	0.712953	0.59158	0.345235	0.602822
Cluster_HAP5	0.17237	1.00231	0.45336	0.634393	1	0.305375	0.824338	0.548997	0.079764	1	0.598387	1	1	0.889484	0.602508	0.0541241	0.491804	1	1	1	0.934867	0.17839	0.359235	0.27527	0.996087	0.362559	0.643063	1	1	0.725452	1	0.88066	1	1	1	1	1	0.568002	1.00231	0.633277	0.215823	1.00231	1.00231	1	0.884104	0.994873	0.845648	0.421322	1
Cluster_Heme	1	1.00077	0.944933	1	1	0.533598	0.782537	0.635381	0.0179518	1	1	1	0.11567	0.499561	0.274867	1	0.340726	1	1	1	0.963853	1	1	0.12537	0.492456	0.861017	0.793057	1	1	0.127138	1	1	1	1	1	1	1	0.257833	1.00077	1	1	1.00077	1.00077	1	0.886007	0.668858	1	0.696065	1
Cluster_HIR1	1	1.00132	0.509247	0.437114	1	0.502893	0.679356	1	0.76758	1	1	1	1	0.53949	0.464582	1	0.631971	1	1	0.089415	0.901894	1	0.689828	1	0.0181432	0.60573	0.44851	1	1	0.374858	1	1	1	1	1	0.160318	0.372656	0.0923814	1.00132	0.339158	1	1.00132	1.00132	1	0.439753	0.501751	0.932787	0.87026	0.441752
Cluster_HIR2	1	1.00088	0.316937	0.318209	1	0.142868	0.0290976	0.292647	0.0476787	0.330639	1	1	1	0.874344	0.425924	0.287552	0.775792	1	1	1	0.693149	1	0.81119	0.193201	0.00368443	0.716588	0.413654	1	1	0.970327	1	0.760937	1	1	1	1	1	0.404264	1.00088	1	0.623558	1.00088	1.00088	1	0.0777967	0.930394	0.952929	0.743636	0.321959
Cluster_Histidine	1	1.00088	0.316937	1	1	0.142868	0.971812	0.000126815	0.398068	1	1	0.250267	1	0.085881	0.696073	1	0.775792	1	1	1	0.693149	1	0.177258	0.0111712	0.139946	0.716588	0.723017	1	1	0.665782	1	1	1	1	1	1	1	0.169975	1.00088	0.568127	0.232208	1.00088	1.00088	1	0.238245	0.631496	0.226726	0.743636	1
Cluster_HMS1	0.123477	1.00099	0.892151	1	1	0.973141	0.68513	0.726735	0.0955335	1	1	0.276794	1	0.644643	0.987159	0.31713	0.18702	1	1	1	0.941586	1	0.52693	0.536029	0.247057	0.941302	0.963906	1	1	0.824684	1	1	1	1	1	1	1	0.545321	1.00099	0.223727	0.074815	1.00099	1.00099	1	0.833342	0.988724	0.582811	0.422597	1
Cluster_HSF1	0.328758	1.00187	0	0.187258	7.9619e-07	0	0	0.000810515	3.92336e-06	0.200921	0.00490591	1	1	0.00147144	0	1	0.812702	1	1	1	0	1	0.00741326	0.01248	0.00584161	0	0	1	0.0210979	0	0.00187	9.82992e-07	1	1	1	0.0244465	0.135237	0	1.00187	0.0814785	0.597645	1.00187	1.00187	0.0873214	0.157927	0	1.23098e-07	1	1
Cluster_HSF1	0.328758	1.00187	0	0.187258	7.9619e-07	0	0	0.000810515	3.92336e-06	0.200921	0.00490591	1	1	0.00147144	0	1	0.812702	1	1	1	0	1	0.00741326	0.01248	0.00584161	0	0	1	0.0210979	0	0.00187	9.82992e-07	1	1	1	0.0244465	0.135237	0	1.00187	0.0814785	0.597645	1.00187	1.00187	0.0873214	0.157927	0	1.23098e-07	1	1
Cluster_IME4	1	1.00154	0.893868	0.488564	0.0610639	0.834005	0.0871457	0.578482	0.503712	1	0.455529	1	0.218036	0.401508	0.278314	1	0.927016	1	1	1	0.526445	1	0.105307	0.414312	0.594666	0.759776	0.585592	0.111807	1	0.879273	1	0.408544	1	1	1	1	0.0973846	0.450149	1.00154	0.413371	0.819195	1.00154	1.00154	1	0.629357	0.817931	0.265143	1	1
Cluster_INO2	0.742456	1.00209	0.756689	0.597582	1	0.788818	0.36797	0.245199	0.00276783	1	0.561893	1	1	0.843349	0.41665	0.185151	0.410446	1	1	1	0.791945	1	0.278462	0.0320816	0.487841	0.568112	0.0446408	1	1	0.967565	1	0.622928	1	1	1	0.241767	0.522186	0.732567	1.00209	0.864037	0.375652	1.00209	1.00209	1	0.464248	0.335418	0.898318	0.345235	0.602822
Cluster_INO4	0.760222	1.0022	0.725495	1	1	0.880038	0.782467	0.770558	0.572049	0.633682	0.580536	1	1	0.961347	0.915103	0.571812	0.110529	1	1	1	0.775236	1	0.318545	0.390206	0.861936	0.901475	0.284414	1	1	0.769614	1	0.658878	1	1	1	0.252744	1	0.79866	1.0022	0.606219	0.687283	1.0022	1.0022	1	0.216119	0.691877	0.648325	0.625743	1
Cluster_InvasiveGrowth	1	1.00033	0.65001	1	1	0.482168	0.737592	0.350975	1	1	0.122074	1	1	1	0.541906	1	1	1	1	1	0.871619	1	1	0.215407	0.872438	0.374695	0.863625	1	1	0.837985	1	0.415194	1	1	1	1	0.109976	1	1.00033	0.270042	1	1.00033	1.00033	1	0.822748	0.841705	1	1	1
Cluster_Isoleucine	0.348236	1.00066	0.422448	0.24967	1	0.880793	0.0252753	0.00386292	0.174497	0.259951	0.229279	1	1	0.788908	0.707172	1	1	1	1	1	0.759684	1	0.713526	0.0700493	0.983744	0.48816	0.577298	1	1	0.994909	1	0.658068	1	1	1	1	1	0.127555	1.00066	1	0.519371	1.00066	1.00066	1	0.968606	0.708427	0.288487	0.639673	1
Cluster_IXR1	0.510131	1.0011	0.237762	0.380501	1	0.629661	0.759081	0.763438	0.609308	1	0.352182	0.302385	1	0.175693	0.0771487	0.345484	0.845753	1	1	1	0.632428	1	0.286315	0.349148	0.822545	0.0672406	0.58042	1	1	0.0524989	1	0.832873	1	1	1	1	1	0.856843	1.0011	0.262311	0.32196	1.0011	1.0011	1	0.7085	0.562905	0.662338	0.817617	1
Cluster_LEU3	0.0552912	1.00143	0.154469	1	1	0.871544	0.146159	0.248834	0.0931613	0.479262	1	0.373867	0.204167	0.343273	0.581548	0.42369	0.911998	1	1	1	0.887368	1	0.453683	0.164316	0.489884	0.266048	0.837314	1	1	0.781046	1	0.902326	1	1	1	1	1	0.338389	1.00143	1	0.18113	1.00143	1.00143	1	0.745324	0.838268	0.993042	0.0400459	0.468242
Cluster_Leucine	1	1.00055	0.487712	1	1	0.704601	0.0595919	0.51352	1	1	1	1	1	1	0.552333	1	0.607147	1	1	1	0.981732	1	0.647143	0.83147	0.967693	0.344826	0.670925	1	1	0.891073	1	0.190564	1	1	1	1	1	0.037416	1.00055	1	0.104197	1.00055	1.00055	1	0.119681	0.972219	0.507275	0.0298025	1
Cluster_Lysine	1	1.00088	0.316937	0.318209	1	0.761162	0.0290976	0.000126815	0.000609607	1	0.293391	0.0302932	1	0.874344	0.0491458	1	0.407017	1	1	1	0.693149	1	0.81119	6.43656e-05	0.355704	0.0108859	0.121025	1	1	0.665782	1	0.760937	1	1	1	1	1	0.404264	1.00088	0.568127	0.232208	1.00088	1.00088	0.211997	0.0777967	0.631496	0.777638	1	1
Cluster_MAC1	1	1.00143	0.752767	1	1	0.444509	0.0540242	0.846543	0.415631	0.479262	1	1	1	0.598355	0.18216	1	0.0140364	1	1	1	0.887368	1	0.453683	0.344272	0.489884	0.0414761	0.64476	1	1	0.781046	1	0.150479	1	1	1	1	0.0117857	0.754196	1.00143	1	0.450301	1.00143	1.00143	1	0.538869	0.473708	0.9509	0.890577	1
Cluster_MAL13	0.760222	1.0022	0.725495	0.616428	1	0.345071	0.782467	0.770558	0.982913	0.256	1	0.513529	1	0.868189	0.822063	0.571812	0.451618	1	1	1	0.942326	1	0.75481	0.582053	0.575994	0.461264	0.689191	1	1	0.394171	1	0.862719	1	1	1	1	0.175695	0.79866	1.0022	0.877607	0.913204	1.0022	1.0022	1	0.846592	0.691877	0.459174	0.843415	1
Cluster_MAL33	0.35452	1.00198	0.284835	0.577813	1	0.2203	0.159595	0.442021	0.78301	0.594943	1	0.477143	1	0.211324	0.828069	1	0.613874	1	1	1	0.438186	1	0.878603	0.463958	0.395695	0.926497	0.777415	1	1	0.0355826	1	0.584464	1	1	1	0.230631	1	0.653092	1.00198	0.547632	0.342689	1.00198	1.00198	0.0146922	0.569024	0.924425	0.871367	0.307122	1
Cluster_Maltose	1	1.0011	0.237762	1	1	0.329785	0.759081	1	0.160529	1	1	1	1	0.925211	0.44736	1	0.845753	1	1	1	0.632428	1	0.875571	0.850137	0.614598	0.406625	0.287097	1	1	0.232541	1	1	1	1	1	1	1	0.992136	1.0011	0.64994	0.0980486	1.0011	1.0011	0.257587	0.46494	0.562905	0.181558	1	1
Cluster_ManualAFT1targets	1	1.00044	0	1	1	0	0.0167293	0.0896318	0.0247232	0.0134158	0.0101943	1	1	1	0	1	0.000840524	1	1	1	0	1	0.162658	0.347499	0	0.0298266	0	1	1	0.307791	1	1	1	1	1	1	1	0.0721995	1.00044	1	1	1.00044	1.00044	1	1	0	0.0101336	1	1
Cluster_ManualAFT1targets	1	1.00044	0	1	1	0	0.0167293	0.0896318	0.0247232	0.0134158	0.0101943	1	1	1	0	1	0.000840524	1	1	1	0	1	0.162658	0.347499	0	0.0298266	0	1	1	0.307791	1	1	1	1	1	1	1	0.0721995	1.00044	1	1	1.00044	1.00044	1	1	0	0.0101336	1	1
Cluster_ManualG1genes	0.0862417	1.00496	0.999865	0.884565	1	0.624446	0.233862	0.740037	0.909678	1	0.858788	0.802806	0.547016	0.322045	0.898742	0.562583	0.0146039	1	1	1	0.672774	1	0.874595	0.83429	0.980265	0.834308	0.381225	1	1	0.995608	1	0.106445	1	1	1	1	0.51587	0.873996	1.00496	1.08836e-22	0.903746	1.00496	1.00496	0.738922	0.999295	0.275336	0.988748	0.569495	0.636318
Cluster_ManualHAP1targets	0.705019	1.00385	0	0.0787335	0.0106447	0	1.19616e-07	0.326496	0	1	1.20229e-06	1	0.00303739	0.973429	0.630856	1.10983e-13	0.563535	1	1	1	0	1	0.106346	0.00621932	0	0.961188	0	1	1	0	1	0.0492613	1	1	1	1	0.387299	0	1.00385	0.0193375	0.00477358	1.00385	1.00385	1	0.00268766	0	0.0119357	2.46538e-05	0.0819484
Cluster_ManualHAP1targets	0.705019	1.00385	0	0.0787335	0.0106447	0	1.19616e-07	0.326496	0	1	1.20229e-06	1	0.00303739	0.973429	0.630856	1.10983e-13	0.563535	1	1	1	0	1	0.106346	0.00621932	0	0.961188	0	1	1	0	1	0.0492613	1	1	1	1	0.387299	0	1.00385	0.0193375	0.00477358	1.00385	1.00385	1	0.00268766	0	0.0119357	2.46538e-05	0.0819484
Cluster_ManualMethionine	0.4533	1.00242	0.420486	0.651518	1	0.26906	0.000491494	0.064388	0.36313	1	2.31194e-05	0.54739	0.0553784	0.107189	0.683845	0.0608107	1	1	1	1	0.926989	1	0.811249	0.184917	0.971883	0.276404	0.8847	1	1	0.824163	0.0810577	0.496753	0.0238303	1	1	1	1	0.892924	1.00242	0.377462	0.471715	1.00242	1.00242	0.00348831	0.211292	0.282219	0.746232	1	1
Cluster_ManualM-G1genes	1	1.00055	0.487712	1	1	0.704601	0.0595919	0.51352	0.657247	1	1	1	1	0.726413	0.552333	1	0.203456	1	1	1	0.795304	1	1	0.470879	0.493535	0.344826	0.670925	1	1	0.98317	0.0190109	1	1	1	1	1	0.176506	0.83477	1.00055	0.408252	0.456928	1.00055	1.00055	1	1	0.750331	0.507275	1	1
Cluster_ManualYap1Targets	0.00815616	1.00474	0	0.139771	1	0	5.3207e-18	0.00909881	0	0.0173793	0.0090856	1	9.04406e-05	2.82094e-06	0	1	0.051141	0.00315553	1	1	0	1	0.0947162	7.91783e-08	0	5.60679e-07	0	1	0.112192	0	1	6.34447e-05	1	1	1	0.12769	0.491575	0	1.00474	0.253544	0.0214092	1.00474	1.00474	0.00147411	1.3348e-09	0	1.50464e-14	0.00441041	0.611442
Cluster_ManualYap1Targets	0.00815616	1.00474	0	0.139771	1	0	5.3207e-18	0.00909881	0	0.0173793	0.0090856	1	9.04406e-05	2.82094e-06	0	1	0.051141	0.00315553	1	1	0	1	0.0947162	7.91783e-08	0	5.60679e-07	0	1	0.112192	0	1	6.34447e-05	1	1	1	0.12769	0.491575	0	1.00474	0.253544	0.0214092	1.00474	1.00474	0.00147411	1.3348e-09	0	1.50464e-14	0.00441041	0.611442
Cluster_ManualZAP1targets	0.832297	1.00275	0.565396	0.698239	1	0.346211	0.40927	0.86743	0.838555	1	1	1	0.355614	0.0953196	0.4536	0.65373	1	1	1	1	0.317767	1	0.325165	0.486221	0.878706	0.777196	0.460901	1	1	0.355881	1	0.10115	1	1	1	1	1	0.721023	1.00275	0.927662	0.95293	1.00275	1.00275	1	0.966602	0.952227	0.725459	0.351457	0.112616
Cluster_ManualZAP1targets-2	0.218571	1.00652	0	0.0563252	1	0	9.04015e-22	0.821456	1.17903e-14	0.00761241	0.240842	0.62265	0.274151	9.31779e-12	0	0.228268	0.561621	1	1	1	0	0.10422	7.7498e-05	0.000597039	4.44058e-10	3.74012e-06	0	0.0882083	0.18604	0	0.0212776	2.36745e-08	1	1	1	1	0.663461	0	1.00652	0.852294	0.919742	1.00652	1.00652	7.04056e-06	8.57226e-08	0	3.2632e-06	0.00299052	0.00631814
Cluster_ManualZAP1targets-2	0.218571	1.00652	0	0.0563252	1	0	9.04015e-22	0.821456	1.17903e-14	0.00761241	0.240842	0.62265	0.274151	9.31779e-12	0	0.228268	0.561621	1	1	1	0	0.10422	7.7498e-05	0.000597039	4.44058e-10	3.74012e-06	0	0.0882083	0.18604	0	0.0212776	2.36745e-08	1	1	1	1	0.663461	0	1.00652	0.852294	0.919742	1.00652	1.00652	7.04056e-06	8.57226e-08	0	3.2632e-06	0.00299052	0.00631814
Cluster_MATa1	1	1.00176	0.10034	0.170206	1	0	0.00170291	0.0139258	0.274293	1	1	0.107987	0.0307781	0.015776	3.60206e-05	1	0.0415051	1	1	1	0	1	0.00014216	0.0735934	0	0.000204692	0	1	1	0	1	0.0348038	1	1	1	5.76992e-08	1	0.00323051	1.00176	0.0674079	0.563756	1.00176	1.00176	1	0.0116177	0	0.398512	0.0283444	1
Cluster_MATa1	1	1.00176	0.10034	0.170206	1	0	0.00170291	0.0139258	0.274293	1	1	0.107987	0.0307781	0.015776	3.60206e-05	1	0.0415051	1	1	1	0	1	0.00014216	0.0735934	0	0.000204692	0	1	1	0	1	0.0348038	1	1	1	5.76992e-08	1	0.00323051	1.00176	0.0674079	0.563756	1.00176	1.00176	1	0.0116177	0	0.398512	0.0283444	1
Cluster_Mating
Cluster_MBP1	0.521462	1.00275	0.331356	0.109139	1	0.847463	0.261309	0.437206	0.256037	0.715115	1	1	0.355614	0.855721	0.752491	0.65373	0.00552012	1	1	1	0.691062	0.208613	0.0814365	0.486221	0.642261	0.979718	0.278669	0.190917	1	0.920078	0.091604	0.932786	1	1	1	1	0.621705	0.415694	1.00275	0.000433797	0.95293	1.00275	1.00275	0.525382	0.839096	0.589344	0.563802	0.920054	1
Cluster_MCM1	0.122662	1.00198	0.97486	1	0.077832	0.825543	0.0709223	0.925429	0.424838	1	1	1	1	0.615425	0.173023	0.533868	0.179788	1	1	1	0.955931	1	0.685498	0.939755	0.395695	0.491122	0.591104	1	1	0.849202	0.0668108	0.81924	1	1	1	1	1	0.90979	1.00198	1	0.144081	1.00198	1.00198	1	0.984689	0.924425	0.335909	0.95332	1
Cluster_MET31	1	1.00121	0.205928	1	0.0482929	0.802264	0.357365	0.00988842	0.238991	1	0.00971809	1	1	0.754279	0.918984	1	0.582619	1	1	1	0.915832	1	0.641355	0.0213723	0.717876	0.900738	0.512384	1	1	0.439372	1	0.558936	1	1	1	1	1	0.908904	1.00121	1	0.366005	1.00121	1.00121	0.039589	0.786681	0.531451	0.730194	0.846173	1
Cluster_MET4	0.631859	1.00154	0.423419	0.488564	1	0.390399	0.00750528	0.107132	0.870576	1	0.0195061	1	1	0.652041	0.278314	0.112479	0.435801	1	1	1	0.977576	1	0.506171	0.414312	0.906102	0.562361	0.336192	1	1	0.0936452	1	0.694132	1	1	1	1	1	0.657792	1.00154	0.770041	1	1.00154	1.00154	1	0.999691	0.44723	0.96429	0.667787	1
Cluster_MIG1	0.723375	1.00198	0.560205	1	1	0.434311	0.676943	0.214714	0.424838	0.594943	0.542424	0.477143	1	0.3944	0.502419	1	0.0712524	1	1	1	0.808514	1	0.105159	0.276705	0.231006	0.30997	0.591104	1	1	0.699775	1	0.584464	1	1	1	1	0.503228	0.152982	1.00198	0.26408	0.629515	1.00198	1.00198	1	0.107537	0.734097	0.72327	1	1
Cluster_Mitochondria	0.436709	1.00385	0.488845	0.813311	1	0.202134	0.368864	0.181095	0.938068	0.827771	0.0594795	1	1	0.564219	0.749237	0.77363	0.952143	1	1	1	0.531176	1	0.198618	0.346051	0.905993	0.852861	0.574753	0.256777	1	0.0353007	1	0.345891	1	1	1	0.399673	0.147142	0.453107	1.00385	0.974754	0.208128	1.00385	1.00385	0.274142	0.475153	0.689731	0.908861	0.819508	0.817768
Cluster_MitochondrialRPs	0.622511	1.00507	0.580329	0.640604	0.187298	0.193704	0.181008	0.9987	0.996982	0.392555	0.587609	0.48756	1	0.352434	0.921751	0.122153	0.382202	1	1	1	0.383189	1	0.655928	0.96058	0.653823	0.861689	0.988835	0.323121	1	0.0121848	1	0.21071	1	1	1	0.14243	0.527726	0.139881	1.00507	0.951565	0.911626	1.00507	1.00507	0.746618	0.955736	0.0707401	0.269273	0.172045	0.37313
Cluster_MOT3	0.434943	1.00088	0.316937	1	1	0.142868	0.971812	1	1	1	0.293391	1	1	1	0.184232	0.287552	0.775792	1	1	1	0.693149	0.0720708	0.177258	0.942132	0.139946	0.198778	0.723017	1	1	0.665782	1	0.760937	1	1	1	1	1	0.878451	1.00088	0.568127	1	1.00088	1.00088	1	0.759253	0.631496	0.952929	0.743636	1
Cluster_mRNAprocessing	0.403274	1.00977	0.95874	0.228473	1	0.951224	0.194841	0.647502	0.618013	0.811844	0.517548	0.606641	0.454989	0.881388	0.663494	0.0104793	0.544029	1	1	0.149222	0.0900093	0.197278	0.018021	0.745379	0.106786	0.811959	0.233409	0.526842	1	0.697788	1	0.47663	1	1	1	1	0.118428	0.748522	1.00977	0.980261	0.431792	1.00977	1.00977	0.735021	0.809483	0.632042	0.708629	0.974593	0.605428
Cluster_MSN2	1	1.00187	0.933959	1	1	0.859356	0.613242	0.404136	0.950983	1	0.522092	0.457945	1	0.343546	0.885702	1	0.812702	1	1	0.124301	0.962052	1	0.857147	0.797219	0.488482	0.777511	0.923707	0.0087838	1	0.955168	1	0.0465486	1	1	1	1	0.135237	0.0948235	1.00187	0.000100472	0.597645	1.00187	1.00187	0.397424	0.675265	0.98724	0.669675	0.944646	0.562239
Cluster_MSN4	0.543891	1.00121	0.556098	0.409484	1	0.802264	0.946886	0.445671	0.238991	1	1	1	1	0.475925	0.785103	1	1	1	1	1	0.915832	1	0.342863	0.886557	0.965666	0.900738	0.912433	1	1	0.962364	1	0.558936	1	1	1	1	0.0633931	0.765736	1.00121	0.684843	0.739095	1.00121	1.00121	0.279387	0.571683	0.979623	0.730194	0.846173	0.413946
Cluster_MSS11	0.631859	1.00154	0.423419	0.488564	1	0.64291	0.801479	0.28748	0.0163256	1	1	1	0.218036	0.197685	0.684088	0.447629	0.204905	1	1	1	0.526445	1	0.105307	0.414312	0.594666	0.898446	0.336192	1	1	0.726475	1	0.694132	1	1	1	1	0.419596	0.930889	1.00154	0.770041	0.819195	1.00154	1.00154	1	0.80975	0.817931	0.696049	0.378413	1
Cluster_MTH1	0.250241	1.00154	0.133781	0.137022	1	0.0331577	0.0871457	0.28748	0.503712	0.504774	0.455529	0.0857115	1	0.197685	0.128741	0.447629	0.435801	1	1	0.103531	0.526445	1	0.261227	0.414312	0.0269514	0.0739112	0.585592	1	0.171656	0.26643	1	0.694132	1	1	1	1	1	0.114273	1.00154	0.413371	0.0677657	1.00154	1.00154	0.341033	0.230016	0.44723	0.0123229	1	1
Cluster_NDD1	0.563631	1.00297	0.857308	0.72586	0.114499	0.891549	0.00387264	0.979678	0.998824	1	1	1	1	0.261525	0.751217	0.309202	0.0751346	1	1	1	0.969292	1	0.592714	0.994918	0.86894	0.747445	0.968267	1	1	0.277924	1	0.842374	1	1	1	1	1	0.959152	1.00297	0.765795	0.0292374	1.00297	1.00297	1	0.395013	0.939219	0.209535	0.628366	1
Cluster_NRG1	1	1.00088	0.316937	1	1	0.142868	0.844952	1	0.890161	0.330639	1	1	0.131071	0.874344	0.889239	1	0.407017	1	1	1	0.693149	1	0.461081	0.447099	0.0336154	0.90916	0.413654	1	1	0.665782	1	0.760937	1	1	1	1	0.267118	0.404264	1.00088	1	0.623558	1.00088	1.00088	1	0.495464	0.631496	0.777638	1	1
Cluster_NuclearProteinTargetting	0.946656	1.00452	0.182945	0.577545	1	0.461523	0.184089	0.819137	0.810791	0.872693	0.831883	0.772116	1	0.613843	0.838067	1	0.398599	1	1	1	0.446284	0.3189	0.00199831	0.905182	0.0971506	0.789232	0.983275	1	0.424405	0.142699	1	0.921566	1	1	1	1	0.797222	0.594143	1.00452	0.594013	0.7091	1.00452	1.00452	1	0.922006	0.806302	0.939707	0.790439	1
Cluster_PDR1	1	1.0011	0.965693	0.380501	0.0439984	0.629661	0.106783	0.763438	0.609308	1	1	1	1	0.703669	0.44736	1	1	1	1	1	0.632428	1	0.286315	0.971631	0.614598	0.856813	0.58042	1	1	0.510233	1	1	1	1	1	1	1	0.203668	1.0011	1	1	1.0011	1.0011	1	0.46494	0.562905	0.662338	0.817617	1
Cluster_PentosePhosphate	1	1.00077	0.761665	1	1	0.533598	0.216138	1	0	1	1	1	1	0.199887	0.0829174	1	0.729695	1	1	1	0.725656	1	0.767426	0.917357	0.220855	0.320636	0.157604	1	1	0.432214	1	0.714089	1	1	1	1	1	0.540299	1.00077	1	1	1.00077	1.00077	1	0.137965	0.945836	0.14961	1	1
Cluster_Peroxisome	0.224048	1.00143	0.154469	0.463454	0.0568256	0.193902	0.310265	0.846543	0.415631	0.479262	0.103054	0.373867	0.204167	0.598355	0.581548	0.42369	0.911998	1	1	1	0.887368	1	0.933445	0.578097	0.489884	0.472065	0.389635	1	1	0.118329	1	0.902326	1	1	1	0.172464	1	0.893606	1.00143	1	0.795681	1.00143	1.00143	1	0.0587588	0.473708	0.833165	1	1
Cluster_PHD1	1	1.00176	0.348676	1	1	0.296106	0.078616	0.900469	0.274293	1	0.146076	1	1	0.984243	0.491451	1	0.285029	1	1	1	0.84103	1	0.167045	0.54862	0.988632	0.524543	0.694374	1	1	0.912886	1	0.763792	1	1	1	1	0.122273	0.460595	1.00176	0.208905	0.858421	1.00176	1.00176	1	0.597388	0.398622	0.609629	0.934363	1
Cluster_PHO4	1	1.00077	0.365912	1	1	0.956819	0.490057	0.239535	0.837023	0.29618	1	1	1	0.199887	0.560999	0.256697	1	1	1	1	0.725656	1	0.390125	0.669724	0.220855	0.320636	0.157604	1	1	0.924702	1	0.714089	1	1	1	1	1	0.257833	1.00077	0.520317	0.57464	1.00077	1.00077	0.188166	0.660332	0.668858	0.392646	0.696065	1
Cluster_Phospholipid	0.832297	1.00275	0.0274775	0.698239	1	0.847463	0.0738319	0.86743	0.561862	1	0.662529	0.593826	1	0.947027	0.302314	1	0.824326	1	1	1	0.691062	1	0.962996	0.657811	0.878706	0.637267	0.278669	1	1	0.920078	1	0.801283	1	1	1	0.00537269	0.621705	0.574004	1.00275	0.727042	0.32217	1.00275	1.00275	0.525382	0.0767934	0.589344	0.246075	0.351457	1
Cluster_Polyamine	1	1.00044	0.563048	1	1	0.794463	0.0167293	0.0896318	0	1	1	1	1	0.645428	0.950388	1	0.526409	1	1	1	0.83259	1	0.162658	0.0833157	0.0607535	1	0.768431	1	1	0.307791	1	1	1	1	1	1	1	0.714684	1.00044	1	1	1.00044	1.00044	1	0.589646	0.794708	0.379077	1	1
Cluster_Proline	1	1.00044	0.563048	0.174258	1	0.794463	0.135933	0.0896318	0.518985	1	1	1	1	0.645428	1	1	0.526409	1	1	1	0.999656	1	1	0.347499	0.307305	1	0.997114	1	1	0.72964	1	0.127849	0.00437134	1	1	1	1	0.340622	1.00044	1	0.0055345	1.00044	1.00044	1	0.0368465	0.794708	0.379077	0.493593	1
Cluster_Proteasome	0.603065	1.00319	0.917045	1	1	0.0342438	0.059669	0.916136	0.0656479	1	0.716449	0.648436	1	0.505037	0.985196	1	0.106791	1	1	1	0.264433	1	0.997644	0.961913	0.062968	0.960098	0.646311	1	1	0.0398659	0.105483	0.99445	1	1	1	1	0.676277	0.432341	1.00319	0.799675	1	1.00319	1.00319	1	0.886424	0.188576	0.975646	0.483295	0.40259
Cluster_Purine	0.702883	1.00187	0.933959	0.187258	1	0.702581	0.115259	0.0191286	0.726886	1	0.16113	0.457945	1	0.343546	0.885702	0.155215	0.812702	1	1	1	0.962052	0.147028	0.0827209	0.103665	0.488482	0.899167	0.973784	1	1	0.985889	1	0.793154	1	1	1	8.56082e-05	0.483521	0.370993	1.00187	0.832225	0.874719	1.00187	1.00187	1	0.928255	0.934405	0.137005	0.510223	0.562239
Cluster_PUT3	1	1.00231	0	1	1	0	1.75682e-08	0.308487	1.17757e-07	0.01743	0.223506	0.168832	0.0509118	0.341909	0	0.21581	5.80996e-07	1	1	1	0	0.0160153	0.00250112	0.635805	0	0	0	1	1	0	0.00285989	0.000829033	1	1	1	1	0.189577	0	1.00231	0.633277	0.713277	1.00231	1.00231	0.125069	0.00265772	0	0.699969	0.421322	0.262331
Cluster_PUT3	1	1.00231	0	1	1	0	1.75682e-08	0.308487	1.17757e-07	0.01743	0.223506	0.168832	0.0509118	0.341909	0	0.21581	5.80996e-07	1	1	1	0	0.0160153	0.00250112	0.635805	0	0	0	1	1	0	0.00285989	0.000829033	1	1	1	1	0.189577	0	1.00231	0.633277	0.713277	1.00231	1.00231	0.125069	0.00265772	0	0.699969	0.421322	0.262331
Cluster_Pyrimidine	1	1.00176	0.636505	1	1	0.889784	0.738192	0.365532	0.661218	0.552117	1	1	1	0.984243	0.977001	1	0.285029	1	1	1	0.84103	1	0.354016	0.338647	0.390922	0.863386	0.855319	1	1	0.386584	1	0.500444	1	1	1	1	0.02121	0.655016	1.00176	0.208905	0.102649	1.00176	1.00176	0.379183	0.899206	0.943729	0.0367057	0.467739	1
Cluster_RAP1	0.473876	1.00099	0.656336	0.3501	1	0.38976	0.415616	1	1	0.363414	0.0531329	1	1	0.903057	0.311816	0.31713	1	1	1	1	0.662094	1	0.52693	0.959481	0.247057	0.796663	0.0929331	1	1	0.824684	1	0.447529	1	1	1	1	0.295056	0.545321	1.00099	1	0.666856	1.00099	1.00099	0.23513	0.611076	0.596217	0.582811	0.422597	1
Cluster_RCS1	1	1.0011	0.860634	0.380501	1	0.998608	0.51258	1	0.951655	1	1	1	1	0.925211	0.221453	0.345484	0.845753	1	1	0.0750801	0.929093	1	0.100627	1	0.942945	0.193507	0.58042	1	1	0.915868	1	0.832873	1	1	1	1	0.321931	0.856843	1.0011	0.64994	1	1.0011	1.0011	1	0.46494	0.98455	0.978086	0.0569929	0.078375
Cluster_REB1	0.874031	1.00319	0.654751	1	1	0.722297	0.634733	0.766815	0.774747	0.767044	0.350606	0.273624	1	0.505037	0.619621	0.340043	0.969316	1	1	1	0.624944	1	0.296351	0.519277	0.859755	0.832224	0.646311	0.217925	1	0.212744	1	0.18525	1	1	1	0.065267	0.00434923	0.716236	1.00319	0.326112	0.663623	1.00319	1.00319	0.578812	0.2499	0.924533	0.44355	0.295443	0.40259
Cluster_RFX1	0.27651	1.00165	0.115861	0.512502	1	0.340896	0.271314	0.885015	0.90533	0.000546933	1	1	1	0.888738	0.384259	0.470576	0.0967464	1	1	1	0.502843	1	0.555896	0.702013	0.294051	0.817445	0.527746	1	3.68577e-05	0.0738491	1	0.455312	1	1	1	1	1	0.557805	1.00165	3.19095e-05	0.840004	1.00165	1.00165	1	0.86041	0.422228	0.0222196	1	1
Cluster_RGM1	1	1.00088	0.985748	1	1	0.457743	0.595292	1	0.0476787	0.330639	1	1	1	0.576652	0.696073	1	1	1	1	1	0.693149	1	0.461081	1	0.355704	0.90916	0.909791	1	1	0.354358	1	0.760937	1	1	1	0.109936	0.267118	0.404264	1.00088	1	1	1.00088	1.00088	1	0.928258	0.631496	0.777638	0.363067	1
Cluster_RGT1	1	1.00286	0.119602	1	1	0.677393	0.100495	0.468577	0.0197194	0.365732	0.0961321	0.233877	0.366858	0.564128	0.685922	0.293666	0.669371	1	1	1	0.303503	1	0.0990884	0.926314	0.0786959	0.695453	0.245347	0.197754	0.295298	0.0225486	1	0.63598	1	1	1	1	0.260515	0.941534	1.00286	0.747055	0.958354	1.00286	1.00286	0.539341	0.201743	0.224154	0.44832	0.796322	0.717495
Cluster_RIM101	0.760222	1.0022	0.487694	0.23952	1	0.749724	0.898779	0.770558	0.572049	1	0.207679	0.156212	1	0.961347	0.0364861	0.571812	0.451618	1	1	1	0.399759	1	0.91285	0.892388	0.241644	0.00957827	0.284414	1	1	0.394171	1	0.972128	1	1	1	1	0.540423	0.170072	1.0022	0.131286	1	1.0022	1.0022	1	0.993446	0.902631	0.810962	0.843415	1
Cluster_RLM1	0.0411525	1.00055	0.980652	1	1	0.991043	1	1	0.657247	1	1	1	1	0.726413	0.84557	0.19093	0.607147	1	1	1	0.981732	1	0.238372	0.470879	0.967693	0.689643	0.914689	1	1	0.891073	1	0.591079	1	1	1	1	1	0.83477	1.00055	1	0.456928	1.00055	1.00055	1	0.944093	0.998411	1	0.572829	1
Cluster_RME1	1	1.00088	0.998326	1	1	0.761162	0.314665	1	0.398068	1	1	1	1	0.26829	0.889239	1	0.775792	1	1	1	0.995787	1	1	0.447099	0.963371	0.90916	0.909791	1	1	0.970327	1	0.760937	1	1	1	1	1	0.878451	1.00088	1	1	1.00088	1.00088	0.211997	0.928258	0.992161	0.777638	0.743636	1
Cluster_RNAPol	0.591967	1.00485	0.0543635	0.61631	1	0.0255036	0.766006	0.376736	0.106343	1	0.28683	1	0.538954	0.422652	0.990548	0.550305	0.330322	1	1	1	0.407575	1	0.0566099	0.449437	0.844234	0.983299	0.879207	0.31151	1	0.281377	1	0.748904	0.0471483	1	1	1	1	0.757827	1.00485	0.94238	0.969075	1.00485	1.00485	0.371588	0.875867	0.0793971	0.677057	0.976797	1
Cluster_ROX1	1	1.00055	0.864392	1	1	0.704601	0.892479	1	0.657247	1	0.19508	1	1	0.321488	0.552333	1	0.607147	1	1	1	0.795304	1	0.647143	0.83147	0.493535	0.344826	0.670925	1	1	0.229234	1	0.190564	1	1	1	1	1	1	1.00055	0.408252	0.456928	1.00055	1.00055	1	0.119681	0.750331	1	0.176652	1
Cluster_RPH1	1	1.00154	0.423419	1	1	0.64291	0.607332	0.578482	0.503712	0.504774	0.455529	1	1	0.197685	0.479008	1	0.204905	1	1	1	0.872334	1	0.770528	0.414312	0.204289	0.562361	0.917658	1	1	0.988343	1	0.918341	1	1	1	1	1	0.930889	1.00154	0.413371	0.819195	1.00154	1.00154	0.341033	0.230016	0.44723	0.87056	0.667787	1
Cluster_RPs	0.452914	1.00708	0.959275	0.953761	1	0.245031	0.256614	0.494897	0.00108092	0.612425	2.18309e-06	1	1	0.987902	0.795879	0.750588	0.785119	1	1	1	0.212286	0.451325	0.679483	0.352279	0.527788	0.507616	0.160129	1	1	0.210274	1	0.91763	1	1	1	0.2362	0.226355	0.879994	1.00708	0.777393	0.312109	1.00708	1.00708	0.289464	0.985785	0.120272	0.904994	0.688437	1
Cluster_rRNAprocessing	1	1.00363	0.338991	0.0660996	1	0.729011	0.0222143	0.991465	0.437107	0.485004	0.0496205	0.326412	0.440292	0.901606	0.627235	0.753535	0.0430389	1	1	1	0.220033	0.00346608	8.08432e-07	0.958402	0.138655	0.387607	0.327796	1	1	0.367772	1	0.647805	1	1	1	1	0.0354425	0.446643	1.00363	0.968835	0.906327	1.00363	1.00363	0.0713968	0.49167	0.14975	0.997743	0.249853	0.204312
Cluster_RTG1	0.843874	1.00286	0.534086	0.71238	1	0.677393	0.629677	0.881605	0.10135	1	0.303281	0.608224	1	0.380985	0.0675045	0.0211359	0.462278	1	1	1	0.303503	0.215995	0.556715	0.537631	0.266522	0.0121476	0.418623	1	1	0.168828	1	0.941948	1	1	1	1	0.260515	0.117092	1.00286	0.110087	0.349552	1.00286	1.00286	1	0.635114	0.825232	0.615127	0.930365	0.717495
Cluster_RTG3	0.575327	1.00132	0.178354	0.0162633	1	0.751058	0.679356	0.822725	0.76758	1	1	1	1	0.955492	0.855814	0.086078	0.893894	1	1	1	0.577014	1	0.174484	0.746278	0.603498	0.60573	0.877534	1	1	0.831752	1	0.6083	1	1	1	1	1	0.231305	1.00132	0.10971	0.40889	1.00132	1.00132	1	0.950189	0.858148	0.560371	0.0281898	0.441752
Cluster_RTS2	1	1.00099	0	0.0630888	1	0	0.415616	0.345208	0.00355474	1	1	1	1	0.127502	0.028776	1	0.469873	1	1	1	0	1	0.0705558	0.803334	0	0.00503951	0	1	1	0	1	0.447529	1	1	1	1	1	0.0252712	1.00099	0.00817566	1	1.00099	1.00099	1	0.148082	0	0.033351	0.00079363	1
Cluster_RTS2	1	1.00099	0	0.0630888	1	0	0.415616	0.345208	0.00355474	1	1	1	1	0.127502	0.028776	1	0.469873	1	1	1	0	1	0.0705558	0.803334	0	0.00503951	0	1	1	0	1	0.447529	1	1	1	1	1	0.0252712	1.00099	0.00817566	1	1.00099	1.00099	1	0.148082	0	0.033351	0.00079363	1
Cluster_SFL1	1	1.00132	0.178354	0.437114	1	0.97225	0.234524	0.211072	0.0025921	1	0.406093	1	1	0.285232	0.252223	0.086078	0.335863	1	1	1	0.577014	1	0.689828	0.506151	0.603498	0.37698	0.44851	1	1	0.374858	1	1	1	1	1	1	1	0.839987	1.00132	0.339158	0.769114	1.00132	1.00132	1	0.029424	0.501751	0.560371	0.87026	1
Cluster_SFP1	0.631859	1.00154	0.893868	0.488564	1	0.939113	0.801479	0.28748	0.143847	1	0.0195061	1	0.218036	0.863623	0.278314	1	0.435801	1	1	1	0.526445	1	0.105307	0.2182	0.594666	0.35167	0.129821	1	1	0.50332	1	0.918341	1	1	1	1	1	0.657792	1.00154	0.413371	0.49001	1.00154	1.00154	1	0.80975	0.817931	0.472781	0.907715	1
Cluster_SIG1	1	1.0022	0.487694	0.0640312	1	0.749724	0.782467	0.1198	0.0528292	1	0.207679	1	0.296346	0.494195	0.822063	0.571812	0.245761	1	1	1	0.399759	1	0.75481	0.112207	0.861936	0.639344	0.839301	1	1	0.394171	1	0.862719	1	1	1	1	0.540423	0.651786	1.0022	0.606219	0.913204	1.0022	1.0022	1	0.216119	0.316657	0.810962	0.192494	0.621684
Cluster_SIP4	0.583693	1.00308	0.095214	1	0.118484	0.116409	0.58218	0.0717498	0.921153	0.155122	0.113986	1	0.0847516	0.084928	0.543986	0.69517	0.878967	1	1	1	0.276865	1	0.434872	0.00755075	0.162876	0.367111	0.0826373	1	0.314045	0.243738	1	0.695408	1	1	1	1	1	0.936266	1.00308	0.783316	0.639588	1.00308	1.00308	1	0.197076	0.531454	0.552632	0.450907	1
Cluster_SKN7	0.521462	1.00275	0.331356	0.698239	1	0.538808	0.0322165	0.86743	0.561862	0.34775	1	0.593826	0.355614	0.0953196	0.931262	0.65373	0.426277	1	1	1	0.317767	1	0.175443	0.486221	0.642261	0.88124	0.982849	1	0.285735	0.920078	1	0.215373	1	1	1	1	0.621705	0.154413	1.00275	0.460297	0.79969	1.00275	1.00275	0.525382	0.839096	0.237443	0.0656992	0.920054	0.7034
Cluster_SKO1	0.0353292	1.00121	0.826498	1	1	0.564935	0.601273	0.445671	0.000673256	1	0.379722	1	1	0.942304	0.996567	0.372662	0.872067	1	1	1	0.604087	1	0.898993	0.209197	0.490663	0.976133	0.76185	1	1	0.439372	1	0.860267	1	1	1	1	0.347785	0.765736	1.00121	0.684843	0.739095	1.00121	1.00121	1	0.786681	0.531451	0.730194	0.0188242	0.0131172
Cluster_SMP1	1	1.00132	0.79035	1	1	0.751058	0.0965478	0.822725	0.32581	1	1	1	0.190054	0.955492	0.464582	1	0.893894	1	1	1	0.577014	1	0.0143374	0.506151	0.377828	0.37698	0.44851	1	1	0.831752	0.0450373	0.31212	1	1	1	1	0.00932558	0.231305	1.00132	1	0.769114	1.00132	1.00132	1	0.665918	0.501751	0.786802	0.87026	0.441752
Cluster_SOK2	1	1.0011	0.237762	1	1	0.329785	0.27017	0.763438	1	1	1	1	1	0.925211	0.8703	1	0.845753	1	1	1	0.632428	1	0.875571	0.616121	0.822545	0.656312	0.58042	1	1	0.915868	1	0.832873	1	1	1	1	0.321931	0.667599	1.0011	1	1	1.0011	1.0011	1	0.46494	0.562905	0.978086	0.479099	0.384758
Cluster_sphingolipids	1	1.0011	0.237762	1	1	0.629661	0.51258	0.763438	0.609308	0.0828499	1	1	1	0.408537	0.221453	1	1	1	1	1	0.632428	1	1	0.616121	0.166143	0.406625	0.58042	1	0.125838	0.763895	1	0.832873	1	1	1	1	1	0.957215	1.0011	0.262311	1	1.0011	1.0011	1	0.236959	0.562905	0.0147297	1	1
Cluster_SRD1	0.226626	1.00264	0.908847	0.309919	1	0.873578	0.965958	0.212022	0.497349	0.700421	0.271373	1	0.344171	0.161588	0.812986	0.638704	0.389828	1	1	1	0.707859	0.201162	0.289232	0.0732681	0.919527	0.847946	0.827349	1	1	0.228776	1	0.777559	1	1	1	1	1	0.491683	1.00264	0.43314	0.133504	1.00264	1.00264	1	0.953657	0.958088	0.822727	0.53043	0.688604
Cluster_STB1	1	1.00088	0.708739	1	1	0.761162	0.314665	0.684343	0.0476787	1	1	1	1	0.26829	0.696073	1	0.0329872	1	1	1	0.693149	1	0.81119	0.942132	0.355704	0.90916	0.723017	1	1	0.970327	0.0302483	1	1	1	1	1	1	0.997118	1.00088	0.568127	1	1.00088	1.00088	1	0.928258	0.631496	0.492197	0.743636	1
Cluster_STE12	0.27651	1.00165	0.869872	0.512502	1	0.133499	0.947116	0.617245	0.0317086	1	0.478685	1	1	1	0.587291	0.470576	0.0967464	1	1	1	0.502843	1	0.307274	0.130108	0.144447	0.251585	0.74467	1	1	0.22232	1	0.455312	1	1	1	1	1	0.880644	1.00165	0.448909	0.243978	1.00165	1.00165	1	0.0641451	0.797248	0.166309	0.705342	1
Cluster_Sterols	0.499376	1.00264	0.789929	0.683405	1	0.206363	0.514621	0.85171	0.799072	1	0.271373	1	0.064702	0.998028	0.983406	3.33712e-06	0.603713	1	1	1	0.979355	1	0.95596	0.988071	0.5673	0.991015	0.827349	1	1	0.58463	1	0.922266	1	1	1	1	0.606686	0.104848	1.00264	0.00161303	0.946801	1.00264	1.00264	0.511001	0.659321	0.852727	0.680195	0.318284	0.688604
Cluster_STP1	0.328758	1.00187	0.315432	0.0068883	1	0.702581	0.115259	0.404136	0.726886	1	1	1	1	0.781356	0.0408788	0.513657	0.812702	1	1	1	0.824894	1	0.857147	0.609903	0.924471	0.115984	0.208615	1	1	0.883288	1	0.543579	1	1	1	1	1	0.738232	1.00187	0.516126	0.874719	1.00187	1.00187	1	0.829489	0.934405	0.137005	0.510223	0.562239
Cluster_STP2	0.379922	1.00209	0.523364	1	0.0819781	0.388101	0.869701	0.478925	0.975533	1	0.191979	0.495663	1	0.444863	0.250988	1	0.652017	1	1	1	0.791945	0.162854	0.278462	0.866197	0.312764	0.113325	0.325582	1	1	0.648393	1	0.379321	1	1	1	1	1	0.564786	1.00209	0.292314	0.375652	1.00209	1.00209	1	0.906471	0.335418	0.59158	0.960635	1
Cluster_SUM1	1	1.00143	0.978404	0.463454	1	0.697509	0.310265	0.248834	0.415631	1	1	1	1	1	0.905866	0.42369	0.386323	1	1	1	0.887368	1	0.933445	0.164316	0.951518	0.689271	0.837314	1	1	0.567078	1	0.360612	1	1	1	1	1	0.965477	1.00143	0.376724	0.450301	1.00143	1.00143	1	0.538869	0.838268	1	0.890577	1
Cluster_SWI4	0.417995	1.00374	0.839512	0.47639	1	0.818964	0.0138401	0.687173	0.493101	1	1	1	1	0.132469	0.937298	0.414944	0.0215437	1	1	1	0.54624	0.272655	0.174891	0.843292	0.416066	0.949374	0.611771	1	1	0.93017	0.122542	0.491223	1	1	1	1	1	0.651183	1.00374	0.443122	0.915085	1.00374	1.00374	1	0.995932	0.141361	0.158502	0.444123	0.483815
Cluster_SWI5	0.776765	1.00231	0.6937	0.634393	1	0.708839	0.186779	0.951646	0.079764	1	1	1	1	0.184266	0.269615	1	0.89518	1	1	1	0.758433	1	0.188337	0.447674	0.1828	0.535293	0.247216	1	1	0.857939	1	0.252405	1	1	1	1	0.189577	0.727954	1.00231	0.633277	0.9232	1.00231	1.00231	1	0.155906	0.670929	0.519216	0.222336	1
Cluster_SWI6	0.328758	1.00187	0.598005	0.187258	1	0.483417	0.115259	0.913847	0.348601	0.574067	1	1	1	0.343546	0.955127	0.155215	0.0164393	1	1	1	0.45876	1	0.202181	0.922246	0.304201	0.991207	0.642857	0.13411	1	0.749584	0.0632157	0.793154	1	1	1	1	0.483521	0.869561	1.00187	0.516126	1	1.00187	1.00187	1	0.829489	0.755245	0.275663	0.769827	1
Cluster_TFs	1	1.0011	0.605262	0.0764835	1	0.849743	0.51258	1	0.951655	1	1	1	1	0.703669	0.0771487	0.0619521	0.52854	1	1	1	0.632428	1	0.587084	0.850137	0.614598	0.0672406	0.287097	1	1	0.0524989	1	0.832873	1	1	1	1	1	0.957215	1.0011	1	0.705178	1.0011	1.0011	1	0.0888307	0.562905	0.662338	0.19659	0.384758
Cluster_THI2	0.0794895	1.00165	0.869872	0.512502	1	0.993116	0.947116	0.885015	0.90533	1	1	1	1	0.979572	0.962508	0.126366	0.244236	1	1	0.110508	0.856865	1	0.95615	0.872613	0.144447	0.927901	0.999589	1	1	0.669555	1	1	1	1	1	0.196237	1	0.186981	1.00165	0.182374	0.840004	1.00165	1.00165	1	0.86041	0.952367	0.543655	0.705342	1
Cluster_Thiamine	1	1.00044	0.563048	1	1	0.37807	0.454299	0.43809	1	1	1	1	1	0.0394135	0.728275	1	0.526409	1	1	1	0.83259	1	1	0.759351	0.9358	0.551716	0.347979	1	1	0.307791	1	1	1	1	1	1	1	0.946261	1.00044	1	1	1.00044	1.00044	1	0.225932	0.794708	0.782952	1	1
Cluster_tRNAprocessing	0.0347092	1.00297	0.857308	1	1	0.276933	0.0663315	0.722087	0.0308497	1	0.319151	1	1	0.261525	0.615604	0.309202	0.699248	1	1	1	0.881932	0.22331	0.11871	0.154962	0.337024	0.452682	0.0976661	1	1	0.61921	1	0.273722	1	1	1	1	0.65005	0.0398274	1.00297	0.124647	0.614372	1.00297	1.00297	1	0.395013	0.211606	0.342426	0.0177751	0.0367872
Cluster_tRNAsynth	0.322163	1.00319	0.654751	1	1	0.844918	0.118328	3.60559e-05	0.222355	0.418417	0.716449	0.648436	1	0.198902	0.473393	0.340043	0.995603	1	1	1	0.264433	1	0.079055	0.00123073	0.124255	0.177699	0.305086	1	0.323233	0.993235	1	0.526789	1	1	1	1	0.676277	0.179647	1.00319	0.562474	0.663623	1.00319	1.00319	1	0.886424	0.188576	0.975646	0.483295	0.755893
Cluster_Tryptophan	1	1.00121	0.205928	1	1	0.277529	0.601273	0.000155151	0	0.424238	0.379722	1	1	0.754279	0.153309	1	0.582619	1	1	1	0.604087	1	0.342863	0.00422516	0.266565	0.282075	0.237033	1	0.137523	0.439372	1	0.860267	1	1	1	1	1	0.138689	1.00121	1	0.0294874	1.00121	1.00121	1	0.786681	0.531451	0.730194	0.846173	0.413946
Cluster_UGA3	0.776765	1.00231	0.948141	0.634393	1	0.51378	0.677791	0.548997	0.638817	0.651643	0.598387	0.530764	1	0.0844176	0.430193	0.21581	0.00489676	1	1	1	0.381825	1	0.188337	0.447674	0.487232	0.215151	0.247216	1	1	0.347089	1	0.458458	1	1	1	1	0.557965	0.568002	1.00231	0.889823	0.9232	1.00231	1.00231	0.465202	0.884104	0.298943	0.981603	1	1
Cluster_USV1	1	1.00187	0.315432	0.557075	1	0.702581	0.790254	0.913847	0.348601	0.574067	1	1	1	0.926586	0.76355	1	0.573005	1	1	1	0.45876	1	0.202181	0.922246	0.0228385	0.41061	0.419694	1	0.204449	0.0455084	1	0.299143	1	1	1	0.219331	0.483521	0.370993	1.00187	0.832225	1	1.00187	1.00187	1	0.675265	0.376333	0.838457	0.944646	1
Cluster_Vacuole	0.35559	1.0063	0.867749	0.275836	1	0.287423	0.867056	0.957848	0.0928564	0.533116	0.916354	0.603782	0.633494	0.553381	0.0118762	0.911289	0.377052	1	1	1	0.2689	1	0.865208	0.558642	0.981459	0.152438	0.11818	0.0831556	0.53633	0.504849	1	0.603077	1	1	1	0.56484	0.171245	0.401125	1.0063	0.932732	0.329987	1.0063	1.0063	0.0854981	0.0701419	0.375864	0.907547	0.399918	0.284264
Cluster_YAP1	1	1.00132	0.934943	1	1	0.502893	0.445109	0.822725	0.0544099	1	1	1	0.190054	0.955492	0.252223	1	0.631971	1	1	1	0.577014	1	0.918008	0.914613	0.603498	0.0715084	0.194738	1	1	0.632915	1	1	1	1	1	1	1	0.661784	1.00132	0.716269	0.40889	1.00132	1.00132	1	0.950189	0.501751	0.786802	0.581214	1
Cluster_YAP5	1	1.00088	0.920444	0.318209	0.0353526	0.761162	0.117612	1	0.398068	1	1	1	1	0.874344	0.425924	1	1	1	1	1	0.693149	1	0.81119	1	0.355704	0.90916	0.909791	1	1	0.354358	1	0.760937	1	1	1	1	1	0.169975	1.00088	1	1	1.00088	1.00088	1	0.759253	0.631496	0.226726	0.363067	1
Cluster_YAP6	0.171325	1.00474	0.300922	0.603699	1	0.149756	0.256286	0.113786	0.961334	0.352045	0.108229	1	0.53075	0.949206	0.525795	0.838938	0.18553	1	1	1	0.697617	1	0.723608	0.115068	0.880707	0.130705	0.587809	1	0.439742	0.0214286	0.152456	0.570568	1	1	1	0.465912	0.812442	0.708521	1.00474	0.989134	0.744264	1.00474	1.00474	0.360963	0.951861	0.782746	0.51134	0.824335	0.144932
Cluster_YFL044C
Cluster_YJL206C
Cluster_ZAP1	0.0794895	1.00165	0.675388	1	1	0.792783	0.0500161	0.131309	0.00175358	0.529039	1	1	1	0.700373	0.384259	0.470576	0.483692	1	1	1	0.502843	1	0.307274	0.276928	0.937694	0.251585	0.288303	1	1	0.840316	1	0.931732	1	1	1	1	0.441736	0.35595	1.00165	1	0.527861	1.00165	1.00165	1	0.948885	0.422228	0.751465	0.92217	1
Cluster_ZMS1	1	1.00176	0.636505	0.0360582	1	0.296106	0.341914	0.900469	0.0549297	0.552117	0.146076	1	1	0.9095	0.683132	1	0.285029	1	1	1	0.480297	1	0.602484	0.900182	0.0998905	0.524543	0.245865	1	1	0.611728	1	1	1	1	1	1	1	0.460595	1.00176	0.483195	0.858421	1.00176	1.00176	0.379183	0.39935	0.776322	0.798743	0.739285	1
Node 1	1	1.00066	0.96512	0.24967	1	0.880793	0.93118	0.0351856	1	1	1	1	1	1	0.707172	0.224509	0.674128	1	1	1	0.998391	1	0.084657	0.254808	0.887437	0.48816	0.971198	1	1	0.994909	1	1	1	1	1	1	0.207888	0.987551	1.00066	1	1	1.00066	1.00066	1	0.821528	0.996954	0.288487	0.639673	1
Node 10	1	1.00099	0.656336	1	1	0.112006	0.415616	0.726735	0.00355474	1	0.323423	1	1	0.127502	0.934817	1	0.051519	1	1	1	0.662094	1	1	0.26924	0.906825	0.992081	0.866499	1	1	0.28808	1	1	1	1	1	1	1	0.927104	1.00099	1	0.666856	1.00099	1.00099	1	0.611076	0.596217	0.582811	0.783765	0.35412
Node 11	1	1.00033	0.951152	1	1	0.880396	0.295116	1	1	1	1	1	1	1	0.89486	1	1	1	1	1	0.994181	1	1	1	0.872438	0.800535	0.863625	1	1	0.837985	1	0.415194	1	1	1	1	1	0.527653	1.00033	1	1	1.00033	1.00033	1	0.822748	0.841705	0.681983	0.399673	0.135552
Node 12	1	1.00044	0.563048	0.174258	1	0.966328	0.135933	0.43809	0.518985	0.181818	1	1	1	0.645428	1	1	1	1	1	1	0.83259	1	1	0.759351	0.307305	1	1	1	0.0523574	0.72964	1	0.127849	1	1	1	1	1	0.946261	1.00044	0.342766	1	1.00044	1.00044	0.112281	0.225932	0.794708	0.0974008	1	1
Node 13	0.147585	1.0011	0.605262	1	1	0.849743	0.27017	0.763438	0.609308	0.394587	0.352182	1	1	0.175693	0.689759	1	0.52854	1	1	1	0.632428	1	0.875571	0.349148	0.368428	0.856813	0.58042	1	1	0.510233	1	1	1	1	1	0.135491	1	0.203668	1.0011	0.64994	1	1.0011	1.0011	1	0.46494	0.562905	0.662338	0.479099	1
Node 14	0.379922	1.00209	0.523364	0.597582	0.00320098	0.388101	0.554599	0.935454	0.829888	0.614798	1	0.495663	1	0.253103	0.948332	0.0418906	0.211953	1	1	1	0.418533	1	0.721836	0.866197	0.966157	0.739437	0.98224	0.14867	1	0.102099	1	0.842335	1	1	1	0.241767	0.161987	0.384128	1.00209	0.57767	0.659381	1.00209	1.00209	1	0.645225	0.335418	0.397609	0.589394	1
Node 15	0.17253	1.00121	0.556098	1	1	0.802264	0.357365	0.795214	0.968315	1	1	1	1	0.754279	0.575345	1	1	1	1	1	0.604087	1	0.342863	0.42912	0.266565	0.510417	0.912433	1	1	0.186579	1	0.558936	1	1	1	0.147994	0.347785	0.317381	1.00121	0.684843	0.739095	1.00121	1.00121	1	0.571683	0.531451	0.908456	0.24076	1
Node 16	1	1.00033	0.951152	1	1	0.880396	0.737592	1	0.347137	1	1	1	1	0.540486	0.89486	1	1	1	1	1	0.994181	1	0.464706	0.656388	0.872438	0.800535	0.863625	1	1	0.837985	1	1	1	1	1	1	1	0.527653	1.00033	1	1	1.00033	1.00033	1	0.822748	0.991017	0.238239	0.0656994	0.00651109
Node 17	1	1.00022	0.982126	0.091287	1	0.953438	1	1	1	0.0954557	1	1	1	1	0.777209	1	1	1	1	1	0.912473	1	0.0353373	1	1	0.658588	0.589936	1	0.0265278	0.934936	1	1	1	1	1	1	1	0.768129	1.00022	0.189281	0.21664	1.00022	1.00022	1	0.684428	0.891476	1	1	1
Node 18
Node 19	1	1.00011	0.866258	1	1	0.784174	0.359746	1	1	1	1	1	1	1	0.527963	1	1	1	1	1	0.955237	1	1	1	1	0.415673	0.768086	1	1	0.744883	1	1	1	1	1	1	1	0.518442	1.00011	1	1	1.00011	1.00011	1	0.438218	0.944183	1	1	1
Node 2	0.122917	1.00308	0.095214	1	0.118484	0.246263	0.0426529	0.745234	0.43437	0.755023	1.44644e-05	0.635511	0.0847516	0.169517	0.258591	0.108145	0.964087	1	1	1	0.871916	1	0.264291	0.315419	0.818369	0.367111	0.187839	1	1	0.403271	0.00506207	0.493761	1	1	1	1	0.663418	0.650245	1.00308	0.302679	0.213235	1.00308	1.00308	0.000131667	0.462041	0.19976	0.833814	0.836441	0.74371
Node 2_fuzzy0.06	0.127319	1.0043	0.0908686	1	0.161183	0.124451	0.0167763	0.0113012	0.491369	0.859197	0.000189966	0.75503	0.147185	0.2639	0.512784	0.0767162	0.918591	1	1	1	0.904778	1	0.455722	0.023616	0.48268	0.587992	0.286523	1	1	0.30477	0.0096653	0.633199	0.0418932	1	1	1	0.440765	0.709756	1.0043	0.553295	0.0297028	1.0043	1.0043	1.37804e-05	0.322629	0.351305	0.343155	0.879509	0.850053
Node 20	1	1.00011	1	1	1	0.784174	0.359746	1	0	1	1	1	1	1	0.527963	1	1	1	1	1	0.955237	1	1	1	1	1	0.768086	1	1	0.744883	1	1	1	1	1	1	1	1	1.00011	1	1	1.00011	1.00011	1	1	0.944183	1	1	1
Node 21	1	1.00033	0.951152	1	1	0.880396	0.737592	1	0.347137	1	1	1	1	0.132535	0.147124	0.119361	0.42909	1	1	1	0.871619	1	1	1	0.872438	0.374695	0.453092	1	1	0.413253	1	1	1	1	1	1	1	0.527653	1.00033	1	1	1.00033	1.00033	1	0.407789	0.841705	0.681983	0.399673	1
Node 22	1	1.00011	0.866258	1	1	0.784174	1	1	0	1	1	1	1	1	0.527963	1	1	1	1	1	0.955237	1	1	1	0.496552	0.415673	0.768086	1	1	0.744883	1	1	1	1	1	1	1	0.518442	1.00011	1	1	1.00011	1.00011	1	1	0.944183	1	1	1
Node 23	1	1.00011	0.866258	1	1	0.784174	1	1	1	1	1	1	1	1	0.527963	1	1	1	1	1	0.955237	1	0.188027	1	0.496552	0.415673	0.768086	1	1	0.744883	1	1	1	1	1	1	1	1	1.00011	1	1	1.00011	1.00011	1	1	0.944183	0.317391	1	1
Node 24
Node 25	1	1.00011	0.866258	1	1	1	0.359746	1	0	1	1	1	1	0.228303	1	1	1	1	1	1	0.955237	1	1	1	1	1	1	1	1	0.744883	1	1	1	1	1	1	1	1	1.00011	1	1	1.00011	1.00011	1	0.438218	0.944183	1	1	1
Node 26	1	1.00011	0.866258	1	1	0.784174	1	1	1	1	1	1	1	1	1	1	1	1	1	1	0.955237	1	1	1	0.496552	1	0.768086	1	1	0.744883	1	1	1	1	1	1	0.0380869	1	1.00011	1	1	1.00011	1.00011	1	0.438218	0.944183	0.317391	0.156397	1
Node 27	1	1.00033	0.65001	1	1	0.989959	0.295116	1	0.347137	1	1	1	1	0.540486	0.541906	1	1	1	1	1	0.871619	1	1	0.656388	0.872438	0.374695	0.453092	1	1	0.837985	1	1	1	1	1	1	0.109976	0.527653	1.00033	1	1	1.00033	1.00033	1	0.407789	0.841705	0.681983	1	1
Node 28
Node 29
Node 3	1	1.00077	0.992037	0.284758	1	0.956819	0.0622903	1	0	0.29618	1	0.22277	1	0.837133	0.0114112	1	0.340726	1	1	1	0.725656	1	1	0.669724	0.220855	0.0232014	0.157604	1	1	0.432214	1	1	1	1	1	1	1	0.257833	1.00077	0.520317	0.57464	1.00077	1.00077	1	0.982372	0.945836	0.392646	0.696065	1
Node 30	1	1.00044	0.563048	1	1	0.37807	0.832023	1	0.518985	1	0.159367	1	1	1	0.355536	1	0.526409	1	1	1	0.83259	1	0.565389	1	0.682351	0.197673	0.347979	1	1	0.307791	1	0.510976	1	1	1	1	1	0.946261	1.00044	1	1	1.00044	1.00044	1	0.225932	0.794708	0.379077	0.493593	1
Node 31	0.819864	1.00264	0.359441	0.309919	0.102438	0.206363	0.350086	0.642888	0.999911	0.110183	0.271373	1	1	0.0757453	0.36888	1	0.933287	1	1	1	0.910047	1	0.85628	0.609766	0.838393	0.573533	0.315116	1	0.276043	0.58463	1	0.18796	1	1	1	1	0.606686	0.200505	1.00264	0.43314	0.946801	1.00264	1.00264	0.511001	0.340612	0.609329	0.341148	0.53043	0.688604
Node 32	0.155198	1.0022	0.231115	0.616428	0.0861061	0.345071	0.618942	0.276549	0.572049	0.633682	1	0.513529	0.296346	0.702587	0.338434	0.200411	0.245761	1	1	1	0.399759	1	0.534981	0.226143	0.124814	0.639344	0.284414	1	0.235954	0.596441	1	0.41921	1	1	1	0.252744	0.540423	0.651786	1.0022	0.32073	0.913204	1.0022	1.0022	0.115296	0.108984	0.316657	0.810962	0.625743	1
Node 33	0.300022	1.00055	0.487712	0.212865	1	0.296437	0.250444	0.51352	0.657247	0.221863	0.19508	1	1	0.726413	0.84557	1	0.607147	1	1	1	0.981732	1	0.647143	0.83147	0.808229	0.689643	0.670925	1	0.0650162	0.229234	1	0.190564	1	1	1	1	1	0.211333	1.00055	0.408252	0.456928	1.00055	1.00055	0.13833	0.725871	0.750331	0.851871	1	1
Node 34
Node 35	0.500089	1.0091	0.00313118	0.184141	1	0.0761723	0.0200182	0.876214	0.129917	0.018297	0.268522	0.791989	0.764486	0.800859	0.482487	0.444145	0.317215	1	1	1	0.496483	0.536911	0.992024	0.891722	0.0996348	0.718142	0.455078	0.501959	0.00470342	0.876924	1	0.59724	1	1	1	0.698394	0.380929	0.589315	1.0091	0.579182	0.921588	1.0091	1.0091	0.433658	0.153688	0.00881489	7.5447e-05	0.997656	0.906197
Node 36
Node 37	1	1.00044	0.563048	0.174258	1	0.794463	0.135933	0.43809	1	1	1	1	1	0.645428	0.0776532	1	0.526409	1	1	1	0.83259	1	1	0.759351	0.682351	0.0298266	0.347979	1	1	0.72964	1	0.127849	1	1	1	1	0.00824748	0.946261	1.00044	0.342766	1	1.00044	1.00044	1	0.900448	0.794708	0.0974008	1	1
Node 38	1	1.00022	0.75039	1	1	0.614911	0.5901	1	1	1	1	1	1	1	0.278718	0.0812432	1	1	1	1	0.912473	1	1	0.089708	0.746568	0.172757	0.589936	1	1	0.554831	1	1	1	1	1	1	1	0.768129	1.00022	1	1	1.00022	1.00022	1	0.192008	0.891476	0.534068	1	1
Node 39	0.0693222	1.00253	0.38916	1	1	0.897159	0.624418	0.373107	0.999857	0.68497	0.631849	0.194538	0.332526	0.629941	0.0323132	0.623028	0.185551	0.0443941	1	1	0.91871	1	0.440568	0.730007	0.788326	0.669338	0.0715186	1	1	0.125074	0.00342899	0.0689701	1	1	1	1	0.591072	0.844412	1.00253	0.405494	0.759831	1.00253	1.00253	3.99142e-05	0.154222	0.629612	0.899274	0.980096	1
Node 4
Node 40	1	1.00033	0.951152	1	1	0.482168	0.0465301	0.350975	1	1	1	1	1	0.540486	1	1	0.42909	1	1	1	0.871619	1	1	0.656388	0.494828	1	0.863625	1	1	0.837985	1	1	1	1	1	1	1	0.888367	1.00033	0.270042	1	1.00033	1.00033	1	0.822748	0.841705	0.681983	1	1
Node 41
Node 42	0.192652	1.00033	0.65001	1	1	0.482168	0.737592	1	1	1	0.122074	1	1	0.132535	0.89486	1	1	1	1	1	0.871619	1	1	1	0.494828	1	0.863625	1	1	0.983412	1	1	1	1	1	1	0.109976	0.888367	1.00033	1	1	1.00033	1.00033	1	0.822748	0.841705	0.238239	0.399673	1
Node 43	1	1.00022	0.75039	1	1	0.614911	0.5901	1	1	1	0.0831306	1	1	1	1	1	1	1	1	1	0.912473	1	1	1	1	1	0.946235	1	1	1	1	1	1	1	1	1	0.0747272	0.268754	1.00022	1	1	1.00022	1.00022	1	0.192008	0.891476	0.534068	1	1
Node 44	0.784198	1.00452	0.342827	0.299931	0.168727	0.18763	0.0152772	0.307793	0.810791	0.602965	0.0947122	0.0556995	1	0.972649	0.973186	1	0.936099	1	1	0.274246	0.152308	1	0.997981	0.461273	0.0266624	0.870383	0.983275	1	1	0.000620837	1	0.999356	1	1	1	0.450066	0.466528	0.349255	1.00452	0.986584	0.0399325	1.00452	1.00452	1	0.0409691	0.324286	0.688848	0.790439	0.863987
Node 45
Node 46	1	1.00011	0.866258	1	1	0.784174	0.359746	0.13418	0	1	1	1	1	1	1	1	1	1	1	1	0.955237	1	1	0.299551	1	1	0.768086	1	1	0.744883	1	1	1	1	1	1	1	1	1.00011	1	1	1.00011	1.00011	1	0.438218	0.944183	1	1	1
Node 47
Node 48	0.13295	1.00022	0.982126	1	1	0.953438	1	0.250368	1	1	1	0.0694556	1	1	0.777209	1	1	1	1	1	0.912473	1	1	0.509395	0.746568	1	0.946235	1	1	0.934936	1	1	1	1	1	1	1	0.768129	1.00022	1	0.21664	1.00022	1.00022	1	0.684428	0.891476	0.534068	1	1
Node 49	1	1.00011	0.866258	1	1	0.784174	1	1	1	1	1	1	1	1	0.527963	1	1	1	1	1	0.955237	1	1	1	1	0.415673	0.768086	1	1	0.744883	1	1	1	1	1	1	1	1	1.00011	0.0995951	1	1.00011	1.00011	1	1	0.944183	1	0.156397	1
Node 5	0.192652	1.00033	0.65001	1	1	0.880396	0.737592	0.350975	1	1	1	1	1	0.132535	0.541906	0.119361	0.42909	1	1	0.0231336	0.871619	1	1	0.656388	0.872438	0.800535	0.453092	1	1	0.837985	1	0.415194	1	1	1	1	1	0.527653	1.00033	1	1	1.00033	1.00033	1	0.407789	0.841705	0.681983	0.399673	0.135552
Node 50	1	1.00022	0.75039	1	1	0.614911	0.129392	1	0.157288	1	1	0.0694556	1	0.0521028	0.777209	1	1	1	1	1	0.912473	1	0.340716	1	0.746568	0.658588	0.589936	1	1	0.554831	1	1	1	1	1	1	1	0.268754	1.00022	1	1	1.00022	1.00022	1	0.684428	0.891476	0.534068	1	1
Node 51	1	1.00033	0.65001	1	1	0.482168	0.295116	0.350975	0.347137	1	0.122074	1	1	1	0.89486	1	1	1	1	1	0.994181	1	1	0.656388	0.872438	1	0.98754	1	1	0.413253	1	0.415194	1	1	1	1	1	0.527653	1.00033	1	1	1.00033	1.00033	1	0.0841179	0.841705	0.238239	0.399673	1
Node 52	1	1.00011	0.866258	1	1	0.784174	0.359746	1	1	1	1	1	1	0.228303	0.527963	1	1	1	1	1	0.955237	1	1	1	1	0.415673	0.768086	1	1	1	1	1	1	1	1	1	1	1	1.00011	1	1	1.00011	1.00011	1	1	0.944183	1	1	1
Node 53	1	1.00022	0.75039	0.091287	1	0.614911	0.5901	1	0.157288	1	1	1	1	1	0.777209	1	1	1	1	1	0.912473	1	1	0.509395	0.746568	1	0.589936	1	1	0.934936	1	1	1	1	1	1	1	0.768129	1.00022	1	0.21664	1.00022	1.00022	1	0.684428	0.891476	0.534068	1	1
Node 54
Node 55	1	1.00033	0.65001	1	1	0.482168	0.737592	1	1	1	1	1	1	1	0.541906	1	0.42909	1	1	1	0.871619	1	1	1	0.122391	0.374695	0.863625	1	1	0.983412	0.011449	0.415194	1	1	1	1	1	0.527653	1.00033	0.270042	0.306681	1.00033	1.00033	1	0.407789	0.841705	0.0319504	1	1
Node 56	1	1.00033	0.65001	1	1	0.482168	0.737592	1	1	1	1	1	1	1	0.541906	1	0.42909	1	1	1	0.871619	1	1	1	0.122391	0.374695	0.863625	1	1	0.983412	0.011449	0.415194	1	1	1	1	1	0.527653	1.00033	0.270042	0.306681	1.00033	1.00033	1	0.407789	0.841705	0.0319504	1	1
Node 57	1	1.00055	0.487712	1	1	0.704601	0.590202	1	0.0844183	1	1	1	1	0.726413	0.552333	1	1	1	1	1	0.795304	1	0.647143	0.162429	0.493535	0.344826	0.670925	1	1	0.622018	1	0.591079	1	1	1	1	1	0.037416	1.00055	0.408252	1	1.00055	1.00055	1	0.944093	0.750331	0.507275	0.176652	1
Node 58	1	1.00055	0.864392	1	1	0.929257	0.0595919	1	0	1	0.19508	1	1	1	0.84557	1	0.607147	1	1	1	0.795304	1	1	1	0.493535	0.931932	0.267242	1	1	0.891073	1	1	1	1	1	1	1	0.534554	1.00055	1	1	1.00055	1.00055	0.13833	0.725871	0.750331	1	0.176652	0.215573
Node 59	1	1.00055	0.487712	1	1	0.929257	0.0595919	1	0.0844183	1	0.19508	1	1	1	0.976593	1	0.607147	1	1	1	0.795304	1	0.647143	1	0.808229	1	0.670925	1	1	0.891073	1	1	1	1	1	1	1	0.211333	1.00055	0.408252	0.456928	1.00055	1.00055	1	0.725871	0.750331	0.851871	0.572829	0.215573
Node 6	1	1.00099	0.656336	1	1	0.38976	0.0609196	0.726735	0.508948	0.363414	1	1	0.0099979	0.903057	0.998842	1	0.469873	1	1	1	0.662094	1	1	0.803334	0.491513	1	0.963906	1	1	0.0705031	1	0.447529	1	1	1	1	0.295056	0.781145	1.00099	1	0.666856	1.00099	1.00099	1	0.833342	0.596217	0.310971	0.154711	0.35412
Node 60	1	1.00011	0.866258	1	1	0.784174	0.359746	1	0	1	1	1	1	1	0.527963	1	1	1	1	1	0.955237	1	1	0.299551	0.496552	1	0.768086	1	1	0.744883	1	1	1	1	1	1	1	0.518442	1.00011	1	1	1.00011	1.00011	1	0.438218	0.944183	0.317391	1	1
Node 61	1	1.00044	0.563048	1	1	0.794463	0.0167293	1	1	1	1	1	1	0.225657	0.728275	1	0.0172399	1	1	1	0.83259	1	1	1	0.682351	0.551716	0.768431	1	1	0.72964	0.015237	1	1	1	1	1	1	0.340622	1.00044	1	0.386382	1.00044	1.00044	1	1	0.794708	0.379077	1	1
Node 62	0.248248	1.00044	0.563048	1	1	0.966328	0.135933	1	1	0.181818	1	1	1	1	0.728275	1	0.526409	1	1	1	0.83259	1	0.565389	0.759351	0.0607535	1	0.95882	1	1	0.946331	1	1	1	1	1	1	1	0.714684	1.00044	0.0518698	0.386382	1.00044	1.00044	1	0.225932	0.794708	1	1	1
Node 63	1	1.00077	0.761665	1	1	0.182227	0.0622903	0.635381	0	1	1	1	1	0.837133	0.0829174	1	1	1	1	1	0.725656	1	1	0.669724	0.492456	0.0232014	0.490995	1	1	0.127138	0.0265165	0.714089	1	1	1	1	0.0267541	0.257833	1.00077	1	1	1.00077	1.00077	0.188166	0.366855	0.668858	0.706278	0.301327	1
Node 64
Node 65	1	1.00066	0.814028	1	1	0.232423	0.698971	0.578831	0.174497	1	1	1	1	0.788908	0.13776	1	0.272241	1	1	1	0.759684	1	0.713526	0.881981	0.983744	0.201492	0.205231	1	1	0.521801	1	0.658068	1	1	1	1	1	0.690218	1.00066	1	1	1.00066	1.00066	1	0.821528	0.708427	1	1	1
Node 66	1	1.00011	0.866258	1	1	0.784174	1	1	0	1	1	1	1	1	0.527963	1	1	1	1	1	0.955237	1	1	1	0.496552	0.415673	0.768086	1	1	0.744883	1	1	1	1	1	1	1	0.518442	1.00011	1	1	1.00011	1.00011	1	1	0.944183	1	1	1
Node 67	1	1.00319	0.816979	0.750958	1	0.218208	0.770282	0.347906	0.00132375	0.0509831	0.350606	0.273624	1	0.924246	0.619621	0.117107	0.893498	1	1	1	0.264433	1	0.471008	0.127867	0.630629	0.718486	0.476351	0.217925	0.323233	0.212744	1	0.962825	1	1	1	1	0.303373	0.179647	1.00319	0.156218	0.431291	1.00319	1.00319	1	0.976873	0.51292	0.296472	0.685886	0.755893
Node 68	0.832297	1.00275	0.331356	0.698239	1	0.179725	0.573881	0.437206	0.072525	0.715115	0.287347	1	1	0.521864	0.611426	1	0.824326	1	1	1	0.317767	0.208613	0.87505	0.486221	0.486093	0.88124	0.460901	0.190917	1	0.0866835	1	0.932786	1	1	1	1	0.621705	0.415694	1.00275	0.233985	0.56048	1.00275	1.00275	1	0.569486	0.237443	0.725459	0.564521	1
Node 69	1	1.00022	0.75039	1	1	0.614911	1	1	1	1	1	1	1	1	0.777209	1	0.311789	1	1	1	0.912473	1	1	0.509395	0.246537	0.658588	0.589936	1	1	0.934936	1	1	1	1	1	1	1	1	1.00022	1	1	1.00022	1.00022	1	0.684428	0.891476	1	0.288349	1
Node 7	0.101099	1.01568	0.00266631	0.898459	1	0.164585	0.00405566	0.24373	0.0192584	0.147603	0.549942	0.374806	0.226873	0.755933	0.0975495	0.695732	0.975576	0.242853	0.0304127	1	0.121255	1	0.795826	0.381529	0.00524268	0.103786	0.112455	1	0.0392361	0.566769	0.0999721	0.101978	1	1	1	0.329478	0.0409966	0.0310001	1.01568	0.836342	0.654002	1.01568	1.01568	0.0218804	0.00288944	0.10221	8.73729e-07	0.4336	0.965176
Node 70	1	1.00011	0.866258	1	1	0.784174	0.359746	1	1	1	1	1	1	1	0.527963	1	1	1	1	1	0.955237	1	1	0.299551	0.496552	0.415673	0.768086	1	1	0.744883	1	1	1	1	1	1	1	0.518442	1.00011	1	1	1.00011	1.00011	1	0.438218	0.944183	1	1	1
Node 71	1	1.00044	0.910896	1	1	0.37807	0.454299	1	0.518985	1	1	1	0.067822	0.645428	0.950388	0.0097394	0.137135	1	1	1	0.83259	1	0.565389	1	0.9358	0.883474	0.768431	1	1	0.72964	1	0.510976	1	1	1	1	1	0.0721995	1.00044	1	1	1.00044	1.00044	1	0.589646	0.794708	1	0.493593	0.176532
Node 72	0.396419	1.02088	0.850227	0.869738	0.568514	0.163628	0.0839315	0.274244	0.00757377	0.952372	0.0258316	0.897493	0.402664	0.742879	0.284913	0.503668	0.999272	1	1	0.173658	0.0777458	1	0.438601	0.490475	0.691179	0.19901	0.128849	0.464369	0.918924	0.656755	1	0.474582	1	1	1	0.502533	0.273104	0.407032	1.02088	0.47985	0.22147	1.02088	1.02088	0.912442	0.999088	0.101763	0.510101	0.52637	0.78052
Node 73	0.954427	1.05125	0.780774	0.471403	0.865265	0.346244	0.00968814	0.272335	0.135504	0.999407	0.00315113	0.998437	0.225986	0.44098	0.789215	0.871024	0.47538	1	1.00004	0.664007	0.0226647	4.94773e-20	1.26597e-41	0.115436	0.129235	0.551253	0.745126	0.976996	0.997501	0.571361	0.819231	0.731956	0.0790091	1	1.00004	0.605038	0.392466	0.980606	1.05125	0.41606	0.877098	1.05125	1.05125	0.295467	0.999669	0.0133752	0.996928	0.876854	0.926827
Node 74	1	1.00066	0.422448	1	1	0.232423	0.372663	0.578831	0.761526	1	1	1	1	1	0.397495	1	0.0658864	1	1	1	0.759684	1	0.315229	0.0700493	0.649814	0.201492	0.858179	1	1	0.959691	1	1	1	1	1	1	0.207888	0.987551	1.00066	1	1	1.00066	1.00066	0.163618	0.821528	0.708427	0.288487	1	1
Node 75	1	1.00033	0.951152	1	1	0.482168	0.295116	0.350975	1	1	1	1	1	1	0.541906	1	0.42909	1	1	1	0.871619	1	0.464706	0.656388	0.494828	0.800535	0.453092	1	1	0.413253	1	0.415194	1	1	1	1	1	0.888367	1.00033	1	1	1.00033	1.00033	1	0.822748	0.841705	0.681983	1	1
Node 76	1	1.00055	0.487712	1	1	0.704601	0.590202	0.51352	0.657247	0.221863	1	0.164725	1	0.321488	0.84557	0.19093	0.607147	1	1	1	0.795304	1	0.0490887	0.83147	0.183152	0.689643	0.670925	1	1	0.622018	1	0.591079	1	1	1	1	0.176506	0.83477	1.00055	0.408252	1	1.00055	1.00055	1	0.725871	0.972219	0.851871	0.176652	1
Node 77	1	1.00011	0.866258	1	1	0.784174	1	0.13418	1	1	1	1	1	0.228303	0.527963	1	1	1	1	1	0.955237	1	0.188027	0.299551	0.496552	0.415673	0.768086	1	1	0.744883	1	1	1	1	1	1	1	0.518442	1.00011	1	1	1.00011	1.00011	1	1	0.944183	1	1	1
Node 78	1	1.00022	0.982126	1	1	0.953438	1	1	0.157288	1	0.0831306	0.0694556	1	1	0.777209	1	1	1	1	1	0.912473	1	1	1	0.746568	1	0.946235	1	1	0.554831	1	1	1	1	1	1	1	0.768129	1.00022	0.189281	1	1.00022	1.00022	1	1	0.99689	1	1	1
Node 79
Node 8	0.145453	1.00574	0.15709	1	1	0.415436	0.298445	0.715471	9.95876e-07	0.730176	0.022084	0.84693	0.0125074	0.406559	0.495939	0.641731	0.681443	0.0977189	1	1	0.797357	1	0.943784	0.38266	0.53536	0.809716	0.438239	1	1	0.292957	1	0.0168153	1	1	1	1	0.135246	0.334708	1.00574	0.416977	0.560502	1.00574	1.00574	0.0654672	0.222954	0.438812	0.11745	0.427262	0.920486
Node 80	0.473876	1.00099	0.656336	0.0630888	1	0.112006	0.68513	8.17155e-07	0.00355474	1	1	0.0380522	1	0.903057	0.311816	1	0.814032	1	1	1	0.662094	1	0.846722	1.92413e-05	0.491513	0.556437	0.866499	1	1	0.824684	1	0.171337	1	1	1	1	1	0.545321	1.00099	1	0.277178	1.00099	1.00099	1	0.350949	0.596217	0.310971	0.154711	1
Node 81	1	1.00066	0.814028	0.0288379	1	0.616505	0.372663	0.000230256	0.761526	1	0.0240826	1	1	0.41394	0.13776	1	0.272241	1	1	1	0.759684	1	1	0.0108357	0.649814	0.0486108	0.577298	1	1	0.521801	1	0.256132	1	1	1	1	1	0.37889	1.00066	1	0.144715	1.00066	1.00066	1	0.23606	0.708427	0.616669	0.639673	1
Node 82	0.434943	1.00088	0.708739	1	1	0.928126	0.117612	0.684343	0.0476787	1	1	1	0.131071	0.26829	0.425924	0.287552	0.0329872	1	1	1	0.953209	1	0.177258	0.447099	0.355704	0.442495	0.723017	1	1	0.879077	1	1	1	1	1	1	1	0.676335	1.00088	0.185642	0.0544031	1.00088	1.00088	1	0.495464	0.930394	0.952929	0.743636	1
Node 83	1	1.00033	0.65001	1	1	0.989959	0.295116	1	1	1	1	1	1	0.540486	0.541906	1	0.42909	1	1	1	0.871619	1	0.464706	0.656388	0.494828	0.374695	0.453092	1	1	0.413253	1	1	1	1	1	1	1	0.527653	1.00033	0.270042	0.306681	1.00033	1.00033	1	0.0841179	0.841705	0.681983	1	1
Node 84	1	1.00044	0.910896	1	1	0.966328	0.454299	1	0.518985	1	1	1	1	1	0.950388	1	0.137135	1	1	1	0.988706	1	0.565389	0.347499	0.307305	0.883474	0.95882	1	1	0.72964	1	1	1	1	1	1	1	0.714684	1.00044	0.0518698	1	1.00044	1.00044	1	0.589646	0.982696	0.0974008	0.493593	1
Node 85	1	1.00154	0.423419	0.488564	1	0.390399	0.205172	1	0.503712	1	1	1	1	0.652041	0.479008	0.112479	0.927016	1	1	1	0.977576	1	0.506171	0.952305	0.00599307	0.562361	0.792679	1	1	0.50332	1	1	1	1	1	1	1	0.0388269	1.00154	0.413371	0.819195	1.00154	1.00154	1	0.80975	0.44723	0.96429	0.907715	1
Node 86
Node 87	1	1.00055	0.487712	1	1	0.296437	0.892479	1	0.657247	0.221863	0.19508	1	1	0.726413	0.976593	1	1	1	1	1	0.795304	1	0.238372	0.470879	0.808229	1	0.988241	1	0.0650162	0.229234	1	0.591079	1	1	1	1	1	0.211333	1.00055	0.408252	0.456928	1.00055	1.00055	1	0.944093	0.750331	0.851871	1	1
Node 88	1	1.00022	0.982126	1	1	0.614911	0.129392	1	0.157288	1	1	1	1	1	0.278718	1	1	1	1	1	0.912473	1	1	1	0.746568	0.172757	0.589936	1	1	0.934936	1	1	1	1	1	1	0.0747272	1	1.00022	1	1	1.00022	1.00022	1	0.684428	0.891476	0.534068	0.288349	1
Node 89	1	1.00044	0.563048	1	1	0.794463	0.832023	0.43809	1	1	0.0101943	1	1	1	0.728275	1	1	1	1	1	0.83259	1	0.162658	0.0833157	0.0607535	0.883474	0.768431	1	1	0.307791	1	1	1	1	1	1	1	0.946261	1.00044	1	1	1.00044	1.00044	1	0.900448	0.794708	0.379077	1	1
Node 9	1	1.00132	0.934943	0.437114	1	0.502893	0.679356	0.492591	0.0544099	0.452439	1	1	1	0.53949	0.988175	1	0.335863	1	1	1	0.901894	1	0.918008	0.506151	0.979639	0.98494	0.99075	1	0.149052	0.374858	1	1	1	1	1	1	1	0.661784	1.00132	1	0.769114	1.00132	1.00132	1	0.665918	0.858148	0.786802	0.581214	0.441752
Node 90	1	1.00011	0.866258	1	1	0.784174	1	1	1	1	1	1	1	1	0.527963	1	1	1	1	1	0.955237	1	1	1	1	1	0.768086	1	1	0.744883	1	1	1	1	1	1	1	0.518442	1.00011	1	0.114917	1.00011	1.00011	1	0.438218	0.944183	1	1	1
[truncated: 36 more columns]
