# Supplementary material for: Conservation and Evolution of Cis-Regulatory Systems in Ascomycete Fungi
Source: PLoS Biol. 2004 Nov 9;2(12):e398. doi: 10.1371/journal.pbio.0020398 (PMC526180; doi:10.1371/journal.pbio.0020398)
Supplement: Dataset S33 — (399 KB XLS). [file pbio.0020398.sd033.xls]

## Sheet: Sheet1
UID	NAME	ABF1	ACE2	ADR1	AFT1	ARO80	ASH1	AZF1	BAS1	CAD1/YAP2	CAT8	CBF1	CHA4	CRZ1	CUP2	DAL80	ECM22	FKH1	FLO8	FZF1	GAL4	GAT1	GATGAG1	GATGAG2	GCN4	GCR1	GLN3	GZF3	HAC1	HAP1	HAP4	HCM1	HSF1	IME1	INO2/4	LEU3	LYS14	MAC1	MAL63	MATALPHA	MCB	MCM1	MCM1-2	MCM1-3	MET30/31	MIG1	MOT3	MSN2/4	MTsite1
Cluster_ABF1	YAL043C
Cluster_ACE2	YAL062W	0.320659	1.00099	0.993076	0.985798	0.431612	0.413463	0.959696	0.949785	0.565636	0.210283	1	0.417055	0.745598	0.0840015	0.995961	0.682036	1	1	1	0.127853	0.952427	0.489338	0.771659	0.64716	0.914197	0.915879	0.960458	0.850464	0.0343225	0.715341	1	0.485045	1	1	0.3836	0.669066	0.706276	0.970626	1	0.380321	0.463306	1.00099	1	1	0.929878	0.97741	0.969152	0.57497
Cluster_adata-aAlpha	YCR041W	0.28582	1.00129	0.991006	0.274411	0.232964	0.920695	0.984631	0.8766	0.0733215	0.420779	0.0810435	0.391586	0.730194	0.686244	0.564114	0.774582	0.0923339	1	1	0.918599	0.938593	0.582636	0.917435	0.936783	0.889906	0.397413	0.722398	0.396231	0.717272	0.646902	1	0.561474	0.131782	1	1	0.762554	0.835461	0.961978	1	0.237581	0.962831	1.00129	1	0.45674	0.909803	0.970729	0.688661	0.431317
Cluster_adata-ARG3	YJL088W	0.498991	1.00129	0.991006	0.881723	0.66844	0.977629	0.908895	0.0126075	0.791235	0.713507	1	0.614496	0.972038	0.988226	0.116974	0.774582	0.854818	1	1	0.78181	0.938593	1	0.578092	0.200279	0.889906	0.208397	0.722398	1	0.293575	0.933617	1	0.561474	1	1	0.466935	0.762554	0.0553468	0.961978	1	0.507222	0.88843	1.00129	1	0.45674	0.909803	0.970729	0.994821	0.136932
Cluster_adata-CalciumSpecific	YGR288W	0.828288	1.00239	0.98345	0.77887	0.562573	0.7115	0.502252	0.750316	0.428872	0.53668	0.039351	0.700525	0.325539	0.86424	0.58067	0.11021	0.426541	1	1	0.855706	0.88953	0.468146	0.874499	0.924532	0.806177	0.441705	0.880982	0.0429555	0.400473	0.957055	1	0.686987	0.111601	1	0.687168	0.929769	0.834747	0.930901	1	0.66309	0.179624	1.00239	1	0.301721	0.839787	0.946602	0.502074	0.318457
Cluster_adata-Chaperones	YBR085C-A	0.568289	1.00099	0.993076	0.730573	0.98181	0.413463	0.546699	0.392863	0.940021	0.565309	0.568321	0.417055	0.495158	0.952788	0.507602	0.682036	0.773316	1	1	0.554157	0.952427	1	0.771659	0.64716	0.914197	0.764216	0.43589	0.537352	0.926811	0.715341	1	0.252897	1	1	1	0.669066	0.411647	0.970626	1	0.881906	0.894924	1.00099	1	0.374553	0.929878	0.97741	0.750599	0.21671
Cluster_adata-EGT2	YDL117W	0.294424	1.0005	0.996533	0.564602	0.865047	0.951024	0.799147	0.195601	0.0722998	0.845623	1	0.360927	0.240274	0.289931	0.982947	0.0937107	1	1	1	1	0.97593	1	0.234338	0.166882	0.956147	0.765314	0.660291	0.613201	0.643321	0.989879	1	0.399411	1	1	0.0202265	1	0.728204	0.985207	1	0.943292	0.205706	1.0005	1	0.209101	0.96431	0.988643	0.866402	0.850267
Cluster_adata-ENA1	YGL168W	0.94609	1.0006	0.99584	0.922073	0.642269	0.915526	0.210037	0.896621	0.733868	0.789789	1	0.57265	0.687148	0.608001	0.519721	1	0.195357	1	1	0.726446	0.971184	0.331785	0.529556	0.928847	0.947608	0.280031	0.923372	0.680143	0.49807	0.999343	1	0.0664347	1	0.0328754	0.251928	1	1	0.982274	1	0.659115	0.484656	1.0006	1	1	0.957325	0.986387	0.841898	0.795758
Cluster_adata-ERD2	YBL040C	0.365809	1.00069	0.995149	0.459361	0.939451	0.872274	0.614195	0.514105	0.0141193	0.73245	0.444541	0.736255	0.952749	0.992895	0.126094	0.17037	0.646112	1	1	0.525407	0.966461	1	0.75264	0.644975	0.939144	0.711605	0.559246	0.735505	0.974696	0.790997	1	0.147616	1	1	0.287268	1	0.502223	0.97935	1	0.854654	0.393895	1.00069	1	1	0.950389	0.984135	0.818085	0.342918
Cluster_adata-G1DNAreplication	YDR098C-B
Cluster_adata-OAC1	YJL200C	0.108952	1.0004	0.997225	0.43056	0.011844	0.837587	1	0.697146	0.0207624	0.897816	1	0.498931	0.825151	0.371416	0.945811	1	0.447604	1	1	0.481779	0.980698	1	0.735202	0.650063	0.964763	0.632788	0.717456	1	0.794165	0.874627	1	0.905809	1	1	0.0125254	0.357376	0.647288	0.988149	1	0.412676	0.282247	1.0004	1	0.171102	0.971346	0.990905	0.891617	0.542547
Cluster_adata-Respiration	YGL188C	0.960318	1.00259	0.982082	0.411402	0.0537972	0.252643	0.953086	0.603415	0.831005	0.093324	0.0152575	0.724358	0.751912	0.661318	0.659188	0.545088	0.715747	1	1	0.237677	0.880884	0.826011	0.506613	0.872772	0.791813	0.73191	0.656858	0.287369	0.0344197	0.789479	1	0.358323	0.731074	1	0.349331	0.94373	0.385822	0.925355	1	0.58528	0.59162	1.00259	1	0.33593	0.82764	0.942278	0.474022	0.0992176
Cluster_adata-RET3	YKL162C-A	0.266007	1.00209	0.985506	0.449406	0.386425	0.216029	0.954017	0.689769	0.982542	0.640287	0.236707	0.237727	0.476315	0.694901	0.175068	1	0.568591	1	1	0.728989	0.902656	0.400128	0.865947	0.719939	0.828207	0.707407	0.174687	0.0568351	0.147058	0.849109	1	0.473218	0.653713	1	0.260932	0.90208	0.891434	0.939279	1	0.376785	0.815088	1.00209	1	0.626955	0.858337	0.953125	0.882301	0.180062
Cluster_adata-Secretion	YDR372C	0.359399	1.00219	0.98482	0.685451	0.446556	0.189305	0.892274	0.439834	0.987638	0.605356	0.258976	0.673952	0.36565	0.452954	0.675855	0.919733	0.827498	1	1	0.890143	0.89826	1	0.922618	0.811119	0.820798	0.291694	0.467475	0.759621	0.370459	0.837448	1	0.710817	0.295207	1	0.65532	0.686452	0.223796	0.936478	1	0.338272	0.614546	1.00219	1	0.267222	0.852109	0.950946	0.531779	0.0345139
Cluster_adata-TRP4	YOR184W	0.217778	1.00139	0.990317	0.175646	0.730301	0.966948	0.929708	0.0010625	0.450885	0.379031	1	0.0491682	0.787231	0.153928	0.723812	0.799006	0.87486	1	1	0.437284	0.934025	0.609786	0.0981936	0.00663101	0.881952	0.702625	0.979044	0.725147	0.092972	0.625572	1	0.248507	0.50675	1	0.139335	0.174433	0.40514	0.959112	0.00554372	0.703505	0.224464	1.00139	1	1	0.903207	0.968511	0.669169	0.389567
Cluster_adata-TUB	YBR162C	0.869681	1.00089	0.993766	0.874465	0.614651	0.769812	0.754921	0.916435	0.466127	0.619212	0.530472	0.517041	0.980255	0.686165	0.583854	1	0.358196	1	1	0.455062	0.957083	1	0.0733592	0.974366	0.922439	0.87038	0.84287	0.478387	0.873736	0.966604	1	0.844804	1	1	1	0.0592984	0.64735	0.973526	1	0.74228	0.541753	1.00089	1	0.344488	0.936666	0.979647	0.772454	0.62823
Cluster_ADR1	YAL017W	0.798951	1.00139	0.990317	0.911876	0.513786	0.494491	0.78402	0.623599	0.988092	0.671265	0.312864	0.31559	0.587602	0.630574	0.263994	0.457062	0.87486	1	1	0.437284	0.934025	0.609786	0.736234	0.778294	0.881952	0.498613	0.312625	0.725147	0.918526	0.625572	1	0.825202	1	1	1	0.050775	0.655362	0.959112	1	0.201563	0.677421	1.00139	1	1	0.903207	0.968511	0.669169	0.962431
Cluster_ARG80	YBR275C	0.320659	1.00099	0.993076	0.0905903	0.206236	0.413463	0.110003	0.392863	0.565636	0.210283	1	0.66702	0.255705	0.320236	0.914771	0.295821	0.773316	1	1	0.0385075	0.952427	1	0.239777	0.380205	0.914197	0.998075	0.43589	0.242526	0.0343225	0.715341	1	0.485045	1	1	1	0.669066	0.926181	0.970626	1	0.380321	0.199688	1.00099	1	1	0.929878	0.97741	0.750599	0.57497
Cluster_ARG81	YDR042C	0.462938	1.00109	0.992385	0.0473467	0.987819	0.864811	0.157742	0.289036	0.959615	0.795942	0.603123	0.0367611	0.154198	0.793768	0.696718	1	0.8046	1	1	0.844911	0.947794	1	0.449452	0.111622	0.906028	0.405157	0.783408	0.591537	0.245869	0.691762	1	0.592241	1	1	0.412731	0.0995989	0.756733	0.967735	1	0.622478	0.653918	1.00109	1	1	0.923138	0.975178	0.729359	0.524176
Cluster_Arginine	YER069W	0.239356	1.00109	0.992385	0.322142	0.517908	0.657687	0.848932	0.0065655	0.653821	0.514057	1	0.329399	0.942101	0.793768	0.875626	1	0.8046	1	1	0.642591	0.947794	0.157246	0.193183	0.0194397	0.906028	0.834717	0.401138	0.876357	0.0917586	0.691762	1	0.592241	1	1	1	1	0.231453	0.967735	1	0.326509	0.15699	1.00109	1	1	0.923138	0.975178	0.729359	0.803541
Cluster_ARO80	YDR289C	0.264515	1.00079	0.994457	0.285774	0.0844827	0.954254	0.150447	0.863864	0.359192	0.675202	0.131168	0.121309	0.0265233	0.448031	0.352213	1	1	1	1	0.631061	0.961761	0.0908957	0.883715	0.549392	0.930754	0.804258	0.514673	0.78129	0.270407	0.764931	1	0.772956	0.0555339	1	1	0.200772	0.270736	0.976434	1	0.170235	0.855072	1.00079	1	1	0.943503	0.981888	0.794943	0.908291
Cluster_ASH1	YBL029W	0.596119	1.00119	0.991696	0.0802773	0.943553	0.942593	0.681554	0.933152	0.282401	0.153914	1	0.477321	0.662344	0.899126	0.996745	0.747192	1	1	1	0.271604	0.943182	1	0.838672	0.880802	0.897931	0.886599	0.369154	0.345067	0.376093	0.668957	1	0.461575	1	1	1	1	0.799505	0.964853	1	0.929574	0.328145	1.00119	1	1	0.916447	0.972951	0.708719	0.47622
Cluster_Asparagine	YPR145W	0.330128	1.0002	0.998612	0.572777	1	0.964724	0.47374	0.75643	0.144139	0.732182	1	0.850771	1	0.951924	0.934482	1	1	1	1	0.140844	0.990303	0.12572	0.559732	0.488675	0.982225	0.713467	0.993664	0.316055	0.333671	0.935221	1	0.693046	1	1	1	1	0.406069	0.994057	1	0.642431	0.531309	1.0002	1	1	0.98557	0.995442	0.94426	0.979922
Cluster_Autophagy	YNL223W	0.783907	1.0006	0.99584	0.674125	0.313002	0.68518	1	0.355871	0.733868	0.789789	1	0.57265	0.687148	0.997521	0.519721	1	0.58948	1	1	0.726446	0.971184	1	0.529556	0.418109	0.947608	0.587968	0.923372	0.278489	0.49807	0.985146	1	0.831447	0.261227	1	1	0.123469	1	0.982274	1	0.265064	0.795925	1.0006	1	1	0.957325	0.986387	0.988921	0.399589
Cluster_AZF1	YJL148W	0.973679	1.00069	0.995149	1	0.0433164	0.872274	0.614195	0.237195	0.813329	0.335768	1	0.736255	0.952749	0.524285	0.7439	0.551545	0.249688	1	1	0.0132456	0.966461	1	0.75264	0.644975	0.939144	0.711605	0.898244	0.735505	0.372202	0.790997	1	0.033962	0.297594	1	1	1	1	0.97935	1	0.580899	0.711559	1.00069	1	0.279962	0.950389	0.984135	0.818085	0.739612
Cluster_BAS1	YAL044C	0.951607	1.00129	0.991006	0.488304	0.66844	0.267752	0.497654	0.518912	0.3663	0.894493	0.664544	0.801577	0.292812	0.185984	0.314617	0.418517	0.854818	1	1	0.980624	0.938593	1	0.789445	0.200279	0.889906	0.803305	0.339717	0.396231	0.508122	0.933617	1	0.994708	1	1	0.466935	1	0.966243	0.961978	1	0.903624	0.962831	1.00129	1	1	0.909803	0.970729	0.688661	0.972744
Cluster_Biotin	YGR286C	0.574588	1.0001	0.999306	1	1	0.81214	1	0.506447	0	0.855683	1	0.613668	0.353303	0.780698	1	1	1	1	1	0.375322	0.99514	1	0.748165	0.699068	0.991073	1	0.920353	1	0.577663	0.96707	1	1	1	1	1	1	1	0.997024	1	1	0.728923	1.0001	1	1	0.992759	0.997719	0.971732	0.858262
Cluster_CAD1	YBL008W	0.462938	1.00109	0.992385	0.564375	0.117008	0.657687	0.970772	0.517456	0.00044563	0.514057	1	0.138016	0.340293	0.793768	0.696718	0.024132	1	1	1	0.194851	0.947794	1	0.449452	0.310223	0.906028	0.405157	0.401138	1	0.245869	0.691762	1	0.0137683	1	1	0.0129904	1	0.756733	0.967735	1	0.951151	0.653918	1.00109	1	0.0876618	0.923138	0.975178	0.729359	0.524176
Cluster_CBF1	YAL026C	0.462938	1.00109	0.992385	0.322142	0.117008	0.960562	0.356091	0.517456	0.203522	0.514057	0.603123	0.570454	0.0525959	0.928694	0.436683	0.716478	0.8046	1	1	0.642591	0.947794	1	0.708307	0.310223	0.995887	0.946315	0.783408	0.876357	0.245869	0.995205	1	0.356409	0.0990348	1	0.0922907	0.70373	0.756733	0.967735	1	0.0876023	0.653918	1.00109	1	1	0.923138	0.975178	0.729359	0.524176
Cluster_CHA4	YJL148W	0.640751	1.00159	0.988941	0.151646	0.827217	0.936997	0.678886	0.114631	0.994839	0.587446	0.739339	0.572299	0.720361	0.737227	0.794335	1	0.66874	1	1	0.778385	0.924955	0.0812086	0.0613976	0.0255761	0.866254	0.295846	0.631907	0.792072	0.265511	0.584993	1	0.621578	0.554155	1	0.539025	0.82965	0.517813	0.953404	1	0.920972	0.332339	1.00159	1	0.528148	0.890156	0.964091	0.631818	0.315494
Cluster_CIN5	YAL037W	0.871201	1.00209	0.985506	0.281684	0.229392	0.641519	0.868874	0.965719	0.243393	0.398248	0.828841	0.575213	0.992094	0.694901	0.343694	0.680042	0.327025	1	1	0.560768	0.902656	1	0.737272	0.850338	0.828207	0.222567	0.174687	0.730156	0.275493	0.494661	1	0.792609	1	0.110491	0.638203	0.66122	0.995815	0.939279	1	0.593014	0.477631	1.00209	1	0.0689232	0.858337	0.953125	0.547282	0.934158
Cluster_CRZ1	YJR001W	0.020558	1.00109	0.992385	0.564375	0.117008	0.864811	0.848932	0.517456	0.653821	0.938503	0.603123	0.329399	0.583652	0.793768	0.436683	1	1	1	1	0.642591	0.947794	0.157246	0.708307	0.566824	0.906028	0.640839	0.401138	0.293518	0.245869	0.691762	1	0.801493	1	0.0594588	0.0922907	0.322427	0.231453	0.967735	1	0.622478	0.848827	1.00109	1	0.403242	0.923138	0.975178	0.729359	0.185964
Cluster_CUP9	YPL198W	0.0522402	1.00089	0.993766	0.978262	0.8523	0.153575	0.754921	0.266666	0.0783118	0.619212	0.530472	0.761418	0.670466	0.686165	0.28603	0.643415	0.115849	1	1	0.71906	0.957083	1	0.949708	0.460292	0.922439	0.189386	0.473648	0.819153	0.685177	0.739722	1	0.844804	1	1	0.353027	1	0.34151	0.973526	1	0.74228	0.252412	1.00089	1	0.0609233	0.936666	0.979647	0.998346	0.62823
Cluster_DAL81	YPR145W	0.892029	1.0005	0.996533	1	1	0.353229	0.418873	0.512089	0.627115	0.845623	1	0.705936	1	0.697353	0.620154	1	0.523793	1	1	0.904935	0.97593	1	0.234338	0.526281	0.956147	0.434	0.94612	0.208486	0.299409	0.845814	1	0.127134	1	1	1	1	0.728204	0.985207	1	0.330739	0.978884	1.0005	1	0.209101	0.96431	0.988643	0.866402	0.977268
Cluster_DAL82	YBR003W	0.556914	1.00169	0.988253	0.755636	0.0073115	0.599971	0.314127	0.704508	1	0.973299	0.40291	0.494327	0.902292	0.689876	0.15028	0.277082	0.422129	1	1	0.66348	0.920453	0.303791	0.889637	0.77276	0.858509	0.953539	0.243623	0.819804	0.947785	0.565698	1	0.174252	1	1	1	0.847504	0.347372	0.950563	1	0.314924	0.282712	1.00169	1	1	0.883701	0.961888	0.613929	0.975393
Cluster_DIG1	YBL016W	0.365809	1.00069	0.995149	0.0531594	0.939451	0.872274	0.894339	0.78396	0.813329	0.933137	0.444541	0.177113	0.475308	0.817291	0.7439	0.551545	0.0595306	1	1	0.806862	0.966461	1	0.75264	0.97086	0.939144	0.910939	0.986191	0.347969	0.665895	0.979654	1	0.675688	1	1	1	1	0.0529709	0.97935	1	0.212425	0.711559	1.00069	1	0.279962	0.950389	0.984135	0.818085	0.739612
Cluster_DOT6	YAR007C	0.359399	1.00219	0.98482	0.685451	0.625624	0.600743	0.892274	0.940816	1	0.365547	0.258976	0.998771	0.539552	0.452954	0.821552	0.704952	0.360327	1	1	0.62392	0.89826	1	0.922618	0.995581	0.983789	0.878712	0.467475	0.759621	0.701598	0.837448	1	0.710817	1	1	0.65532	0.686452	0.392016	0.936478	1	0.550095	0.11439	1.00219	1	1	0.852109	0.950946	0.872844	0.807787
Cluster_DrugResistance	YHR064C	0.659625	1.00069	0.995149	0.94908	0.730514	0.610343	0.894339	0.237195	1	0.335768	1	0.449947	0.0006845	0.524285	0.985711	0.551545	0.646112	1	1	0.806862	0.966461	0.375223	0.986722	0.644975	0.939144	0.711605	0.99885	1	0.372202	0.790997	1	0.89375	0.297594	1	1	0.538819	0.83862	0.97935	1	0.212425	0.711559	1.00069	1	1	0.950389	0.984135	0.818085	0.739612
Cluster_Endocytosis	YNL084C	0.239356	1.00109	0.992385	0.564375	0.280593	0.991527	0.356091	0.517456	0.203522	0.514057	0.220304	0.91658	0.340293	0.553491	0.875626	1	0.460479	1	1	0.194851	0.947794	0.0304103	0.0410368	0.566824	0.906028	0.989122	0.401138	0.876357	0.702116	0.691762	1	0.931408	1	1	0.0922907	0.70373	0.756733	0.967735	1	0.326509	0.653918	1.00109	1	0.403242	0.923138	0.975178	0.729359	0.524176
Cluster_FattyAcid	YBR041W	0.822605	1.00219	0.98482	0.685451	0.784621	0.986563	0.237011	0.757996	0.639936	0.365547	0.53875	0.091441	0.217901	0.809949	0.675855	0.0815112	0.360327	1	1	0.161236	0.89826	0.772229	0.508705	0.811119	0.820798	0.768392	0.467475	0.328775	0.370459	0.478338	1	0.990841	1	1	0.65532	0.408893	0.909381	0.936478	1	0.87136	0.774545	1.00219	1	1	0.852109	0.950946	0.531779	0.807787
Cluster_FHL1	YBL072C	0.299777	1.006	0.959066	0.63159	0.634502	0.18033	0.982666	0.14332	0.808585	0.956521	0.206077	0.973016	0.46226	0.00136513	0.825178	0.476937	0.852801	1	1	0.702487	0.745887	0.0391677	0.437302	0.335949	0.582981	0.952165	0.801569	0.60491	0.796769	0.133312	1	0.236855	0.951973	1	0.0627415	0.76654	0.125994	0.835832	1	0.0324449	0.647515	1.006	1.00002	0.0558225	0.645775	0.871589	0.910792	0.128979
Cluster_FKH1	YBL082C	0.365809	1.00069	0.995149	0.193814	0.939451	0.610343	0.894339	0.78396	1	0.933137	0.444541	0.177113	0.205253	0.954414	0.7439	0.551545	0.249688	1	1	0.806862	0.966461	1	0.131123	0.872829	0.939144	0.987427	0.559246	1	0.880578	0.790997	1	0.383089	1	1	1	0.538819	0.502223	0.97935	1	0.580899	0.711559	1.00069	1	0.279962	0.950389	0.984135	0.818085	0.342918
Cluster_FKH2	YAL024C	0.182414	1.00199	0.986192	0.87529	0.691941	0.245804	0.841221	0.880641	0.509655	0.849022	0.486972	0.465682	0.411131	0.871776	0.766711	0.899021	0.534081	1	1	0.822257	0.907073	0.376543	0.609782	0.604488	0.835682	0.95796	0.789945	0.464026	0.514345	0.51154	1	0.122821	0.635758	1	1	0.634379	0.498578	0.942088	1	0.636357	0.531295	1.00199	1	0.609002	0.86461	0.955308	0.891568	0.946831
Cluster_Flavin	YDR487C	0.967274	1.0004	0.997225	0.817519	0.40147	0.837587	0.303735	0.322196	1	0.897816	0.285323	0.836231	0.442883	0.997692	0.945811	0.00464689	0.0941311	1	1	0.481779	0.980698	1	0.948215	0.650063	0.964763	0.632788	0.717456	1	0.436974	0.874627	1	0.236045	1	0.0220366	0.175917	0.357376	1	0.988149	1	0.821572	0.936559	1.0004	1	1	0.971346	0.990905	0.995399	0.989837
Cluster_Flocculation	YAR050W	0.790345	1.0004	0.997225	0.43056	0.40147	0.434975	0.723092	0.697146	1	0.536054	1	0.141766	0.442883	0.964781	0.306338	0.367568	1	1	1	0.151906	0.980698	1	0.948215	0.650063	0.964763	0.261446	0.717456	0.532258	0.111304	0.874627	1	0.236045	1	1	1	0.357376	0.227321	0.988149	1	0.821572	0.936559	1.0004	1	1	0.971346	0.990905	0.891617	0.901067
Cluster_FZF1	YJL148W	0.239356	1.00109	0.992385	0.792897	0.517908	0.960562	0.157742	0.894942	0.653821	0.179905	0.0526839	0.00463207	0.340293	0.268401	0.875626	0.337618	1	1	1	0.019357	0.947794	1	0.882525	0.920828	0.906028	0.946315	0.401138	0.591537	0.0917586	0.951137	1	0.931408	1	1	0.412731	0.322427	0.756733	0.967735	1	0.0876023	0.653918	1.00109	1	1	0.923138	0.975178	0.729359	0.803541
Cluster_GAL4	YBR017C	0.784617	1.00079	0.994457	0.563514	0.251774	0.189134	0.383379	0.377423	0.870829	0.287277	1	0.344523	0.580103	0.753048	0.877799	0.600107	1	1	1	0.137753	0.961761	1	0.883715	0.253352	0.930754	0.557183	0.514673	0.146835	0.541859	0.764931	1	0.513575	1	1	1	1	0.579386	0.976434	1	0.507753	0.625451	1.00079	1	1	0.943503	0.981888	0.794943	0.982513
Cluster_Galactose	YBR018C
Cluster_GAT1	YAL013W	0.217778	1.00139	0.990317	0.348484	0.890064	0.894999	0.563304	0.623599	0.988092	0.379031	0.0972141	0.72932	0.587602	0.630574	0.500234	0.799006	0.594273	1	1	0.653396	0.934025	1	0.514836	0.905518	0.881952	0.859238	0.312625	0.725147	0.628951	0.625572	1	0.112623	0.50675	1	1	1	0.973994	0.959112	1	0.703505	0.677421	1.00139	1	0.481667	0.903207	0.968511	0.669169	0.681818
Cluster_GAT3	YDL082W	0.431782	1.0004	0.997225	1	0.40147	0.434975	0.723092	0.940698	1	0.536054	1	0.836231	0.442883	0.788904	0.995712	1	1	1	1	0.847781	0.980698	1	0.948215	0.915635	0.964763	0.917927	0.96589	0.140779	0.794165	0.874627	1	0.602401	0.18276	1	1	0.357376	0.647288	0.988149	1	0.412676	0.282247	1.0004	1	1	0.971346	0.990905	0.891617	0.542547
Cluster_GCN4	YBR043C	0.359399	1.00219	0.98482	0.339764	0.154565	0.780157	0.399834	3.09053e-07	0.302835	0.605356	0.842655	0.0352746	0.994428	0.256433	0.915471	0.919733	0.601475	1	1	0.890143	0.89826	0.772229	0.157428	0.000375951	0.820798	0.980487	0.97333	0.759621	0.701598	0.478338	1	0.124351	1	1	1	0.408893	0.392016	0.936478	1	0.338272	0.247683	1.00219	1	1	0.852109	0.950946	0.872844	0.61909
Cluster_GCR1	YDR240C	0.659625	1.00069	0.995149	0.94908	0.730514	0.610343	0.296029	0.941686	0.251466	0.933137	0.444541	0.736255	0.475308	0.817291	0.43005	0.17037	0.249688	1	1	1	0.966461	0.0711578	0.440323	0.97086	0.939144	0.42312	0.559246	0.347969	0.665895	0.979654	1	0.675688	0.297594	1	0.0398903	0.538819	0.83862	0.97935	1	0.212425	0.393895	1.00069	1	1	0.950389	0.984135	0.818085	0.739612
Cluster_GCR2	YDR240C	0.788282	1.00099	0.993076	0.730573	0.206236	0.899629	0.959696	0.949785	0.134183	0.565309	0.568321	0.9548	0.255705	0.619021	0.761775	0.682036	0.773316	1	1	0.127853	0.952427	0.489338	0.239777	0.989245	0.914197	0.981339	0.813473	1	0.327854	0.959149	1	0.895976	1	1	0.0778725	1	0.926181	0.970626	1	0.380321	0.894924	1.00099	1	1	0.929878	0.97741	0.750599	0.57497
Cluster_GeneralTFs	YKL058W	0.415877	1.00259	0.982082	0.411402	0.666516	0.252643	0.997448	0.301048	0.831005	0.929842	0.152545	0.270273	0.440939	0.806867	0.486912	0.94929	0.715747	1	1	0.534869	0.993019	1	0.994484	0.6235	0.977711	0.089254	0.656858	0.149066	0.428402	0.990268	1	0.225186	0.731074	0.134977	0.122075	1	0.990066	0.997339	1	0.58528	0.859941	1.00259	1	0.33593	0.82764	0.998435	0.994279	0.26578
Cluster_GLN3	YJL148W	0.125935	1.00129	0.991006	0.123345	0.232964	0.546954	0.736724	0.725597	0.791235	0.420779	0.664544	0.194927	0.0134013	0.954544	0.314617	1	0.55258	1	1	0.353816	0.938593	0.582636	0.789445	0.651568	0.889906	0.615192	0.339717	0.17452	0.508122	0.933617	1	0.345026	0.481193	1	1	0.401315	0.601743	0.961978	1	0.507222	0.513815	1.00129	1	1	0.909803	0.970729	0.949416	0.136932
Cluster_Glutamate	YOR375C	0.967274	1.0004	0.997225	0.817519	0.40147	0.837587	1	0.697146	0.489441	0.536054	1	0.141766	0.825151	0.788904	0.306338	1	1	1	1	0.481779	0.980698	1	0.735202	0.915635	0.964763	0.632788	0.717456	0.532258	0.794165	0.874627	1	0.602401	1	1	1	0.357376	1	0.988149	1	0.412676	0.702276	1.0004	1	1	0.971346	0.990905	0.891617	0.542547
Cluster_Glutathione	YPR035W	0.035947	1.0006	0.99584	0.674125	0.909603	0.286838	0.0520177	0.115466	0.733868	0.957292	1	0.839222	0.120979	0.608001	0.519721	1	0.58948	1	1	0.726446	0.971184	1	0.529556	0.418109	0.947608	0.280031	0.607674	1	0.49807	0.817948	1	0.831447	1	1	1	1	0.416408	0.982274	1	0.265064	0.950218	1.0006	1	1	0.957325	0.986387	0.841898	0.795758
Cluster_Glycerol	YIL053W	0.294424	1.0005	0.996533	0.229498	0.532514	0.951024	0.0221405	0.970743	0.0722998	0.458662	0.342906	0.705936	0.577955	0.697353	0.227884	1	1	1	1	0.275698	0.97593	1	0.628941	0.835737	0.956147	0.146411	0.660291	1	0.0642774	0.845814	1	0.737727	1	1	0.21484	1	0.323624	0.985207	1	0.740426	0.205706	1.0005	1	1	0.96431	0.988643	0.866402	0.465617
Cluster_Glycogen	YOR178C	0.611063	1.0003	0.997918	0.720779	1	0.535628	0.618253	0.12986	0.322996	0.626495	1	0.231057	0.286248	0.876843	0.836973	1	0.359236	1	1	0.756281	0.985489	1	0.984043	0.341587	0.973455	0.447117	0.779565	0.434388	0.192721	0.904418	1	0.829957	1	1	1	1	1	0.991099	1	0.897491	0.387255	1.0003	1	1	0.978433	0.993171	0.917562	0.632177
Cluster_GTS1	YBR273C	0.294008	1.00179	0.987566	0.632949	0.576011	0.553938	0.908136	0.986613	0.997793	0.243837	0.431712	0.244207	0.656081	0.210168	0.935683	0.308028	0.930935	1	1	0.865363	0.915971	1	0.299261	0.939495	0.850832	0.656295	0.950252	0.188093	0.0211943	0.547039	1	0.408376	1	1	1	0.289708	0.817163	0.94773	1	0.870991	0.23879	1.00179	1	1	0.877291	0.95969	0.596545	0.253388
Cluster_HAL9	YER001W	0.239356	1.00109	0.992385	0.792897	0.280593	0.35919	0.356091	0.517456	0.203522	0.179905	0.603123	0.7829	0.806327	0.268401	0.436683	0.337618	0.460479	1	1	0.642591	0.947794	0.522547	0.708307	0.566824	0.906028	0.405157	0.401138	0.876357	0.0917586	0.691762	1	0.592241	1	1	1	0.70373	1	0.967735	1	0.622478	0.653918	1.00109	1	1	0.923138	0.975178	0.996884	0.185964
Cluster_HAP2	YJL148W	0.722808	1.00149	0.989629	0.107252	0.370861	0.693333	0.0880727	0.714017	0.532512	0.62909	0.71647	0.818026	0.834169	0.910845	0.439743	0.494082	0.342656	1	1	0.720894	0.929479	1	0.454598	0.293983	0.874068	0.593426	0.28769	1	0.53965	0.914374	1	0.535143	1	1	0.15598	0.809707	0.890386	0.956254	1	0.839838	0.615336	1.00149	1	1	0.896658	0.966299	0.650226	0.640396
Cluster_HAP3	YBR039W	0.944923	1.00169	0.988253	0.567913	0.164037	0.143253	0.158807	0.704508	0.296053	0.546718	0.40291	0.683689	0.773997	0.941241	0.15028	0.563106	0.198612	1	1	0.28303	0.920453	0.681105	0.346387	0.385321	0.858509	0.383579	0.602654	0.584079	0.872469	0.565698	1	0.6982	0.576124	1	0.560823	0.847504	0.988112	0.950563	1	0.963874	0.282712	1.00169	1	1	0.883701	0.961888	0.918038	0.559127
Cluster_HAP4	YBL045C	0.746392	1.00189	0.986879	0.176229	0.0606037	0.278804	0.630092	0.835075	0.788937	0.217324	0.00291701	0.352297	0.944373	0.777431	0.441227	0.886742	0.759233	1	1	0.131328	0.911512	0.721261	0.256954	0.815791	0.843223	0.727921	0.546165	0.221287	0.0143019	0.528992	1	0.49165	0.616873	1	1	0.877799	0.845745	0.944905	1	0.841483	0.586506	1.00189	1	0.215544	0.870928	0.957497	0.579652	0.226471
Cluster_HAP5	YBR039W	0.640751	1.00159	0.988941	0.497679	0.252953	0.833399	0.0459909	0.618401	0.608468	0.587446	0.739339	0.95409	0.872105	0.737227	0.383485	0.0862792	0.382685	1	1	0.100245	0.924955	1	0.398262	0.446557	0.866254	0.931723	0.264743	0.792072	0.453663	0.584993	1	0.424011	1	1	0.539025	0.510573	0.910951	0.953404	1	0.357333	0.149356	1.00159	1	1	0.890156	0.964091	0.631818	0.935522
Cluster_Heme	YDR232W	0.534633	1.00079	0.994457	0.285774	0.799489	0.539429	1	0.377423	0.359192	0.287277	1	0.846856	0.83581	0.753048	0.0937917	0.600107	0.694936	1	1	0.631061	0.961761	0.0908957	0.883715	0.253352	0.930754	0.0221703	0.514673	0.415014	0.270407	0.764931	1	0.252604	1	1	1	0.00590558	0.270736	0.976434	1	0.507753	0.625451	1.00079	1	0.31298	0.943503	0.981888	0.794943	0.683386
Cluster_HIR1	YAR002W	0.0884411	1.00109	0.992385	0.142483	0.921725	0.864811	0.848932	0.970351	0.203522	0.795942	0.220304	0.570454	0.0129903	0.553491	0.184849	0.716478	1	1	1	0.399396	0.947794	0.157246	0.708307	0.566824	0.906028	0.989122	0.401138	0.106549	0.471327	0.951137	1	0.931408	1	1	1	0.70373	0.231453	0.967735	1	0.0876023	0.848827	1.00109	1	1	0.923138	0.975178	0.96299	0.185964
Cluster_HIR2	YBR010W	0.534633	1.00079	0.994457	0.825536	0.799489	0.992139	1	0.863864	0.000429962	0.287277	0.489309	0.344523	0.30065	0.137888	0.0937917	0.600107	0.694936	1	1	0.976852	0.961761	1	0.0980783	0.253352	0.930754	0.557183	0.514673	1	0.789932	0.764931	1	0.772956	1	1	1	0.587111	0.579386	0.976434	1	0.507753	0.31671	1.00079	1	0.31298	0.943503	0.981888	0.794943	0.908291
Cluster_Histidine	YER055C	0.49173	1.0006	0.99584	0.922073	0.909603	0.915526	0.0520177	0.115466	0.15225	0.789789	1	0.57265	0.687148	0.226317	0.821018	0.497091	1	1	1	0.726446	0.971184	0.331785	0.827711	0.116637	0.947608	0.853986	0.991617	0.680143	0.788571	0.817948	1	0.550289	0.0317534	1	0.251928	1	0.790563	0.982274	1	0.265064	0.484656	1.0006	1	1	0.957325	0.986387	0.841898	0.795758
Cluster_HMS1	YBR133C	0.877119	1.00069	0.995149	0.193814	0.730514	0.973197	0.296029	0.514105	1	0.73245	0.444541	0.736255	0.475308	0.817291	0.7439	0.551545	0.249688	1	1	0.0742331	0.966461	0.375223	0.75264	0.327362	0.939144	0.987427	0.898244	0.347969	0.372202	0.790997	1	0.383089	1	1	0.287268	0.538819	0.83862	0.97935	1	0.580899	0.711559	1.00069	1	0.279962	0.950389	0.984135	0.984777	0.342918
Cluster_HSF1	YAL003W	0.408294	1.00139	0.990317	0.175646	0.996343	0.739317	0.33353	0.226267	0.841388	0.868394	0.691597	0.146662	0.0791195	0.630574	0.500234	0.0563648	0.30242	1	1	0.437284	0.934025	0.609786	0.514836	0.352188	0.881952	0.296213	0.905282	0.0786819	0.973515	0.924192	1	0.112623	0.50675	1	0.0257987	0.174433	0.024323	0.959112	1	0.95772	0.677421	1.00139	1	0.132695	0.903207	0.968511	0.669169	0.117498
Cluster_IME4	YAL018C	0.678285	1.00089	0.993766	0.654288	0.341462	0.929633	0.467879	0.916435	0.466127	0.619212	0.530472	0.0123147	0.883051	0.379993	0.28603	1	0.358196	1	1	0.00235222	0.957083	1	0.595532	0.974366	0.922439	0.0114559	0.473648	0.478387	0.427205	0.739722	1	0.959504	0.365055	1	0.353027	0.241193	0.64735	0.973526	1	0.136421	0.932855	1.00089	1	0.344488	0.936666	0.979647	0.772454	0.62823
Cluster_INO2	YBR029C	0.120185	1.00159	0.988941	0.700423	0.827217	0.646645	0.857543	0.24313	0.0407094	0.587446	0.373429	0.023635	0.321871	0.284738	0.608517	0.840209	0.058325	1	1	0.100245	0.924955	0.279115	0.192357	0.0978207	0.866254	0.150209	0.264743	0.294942	0.453663	0.584993	1	0.969847	0.554155	1	0.539025	0.510573	0.517813	0.953404	1	0.143782	0.885713	1.00159	1	0.528148	0.890156	0.964091	0.926348	0.0865099
Cluster_INO4	YAL054C	0.822605	1.00219	0.98482	0.82853	0.784621	0.600743	0.763578	0.870443	0.897753	0.365547	0.53875	0.0352746	0.113039	0.809949	0.821552	1	0.360327	1	1	0.287947	0.89826	0.423285	0.96918	0.811119	0.983789	0.164961	0.746445	0.543545	0.221226	0.837448	1	0.710817	0.670784	1	0.278744	0.686452	0.392016	0.936478	1	0.0494413	0.774545	1.00219	1	0.267222	0.852109	0.950946	0.872844	0.378535
Cluster_InvasiveGrowth	YPL049C	0.819049	1.0002	0.998612	0.119943	1	0.964724	1	0.75643	1	0.732182	1	0.376565	1	0.951924	0.553516	1	1	1	1	0.140844	0.990303	1	0.936598	0.909461	0.982225	0.713467	0.847043	0.316055	0.333671	0.935221	1	0.693046	1	1	1	1	1	0.994057	1	0.960624	0.926537	1.0002	1	1	0.98557	0.995442	0.94426	0.736602
Cluster_Isoleucine	YJR148W	0.195771	1.0006	0.99584	0.922073	0.0169947	0.68518	0.854318	0.115466	1	0.392437	1	0.96503	0.120979	0.226317	0.821018	0.497091	0.58948	1	1	0.404605	0.971184	1	0.827711	0.418109	0.947608	0.587968	0.923372	1	0.947805	0.817948	1	0.248533	1	1	1	0.484884	1	0.982274	1	0.659115	0.484656	1.0006	1	1	0.957325	0.986387	0.841898	0.399589
Cluster_IXR1	YDR472W	0.783907	1.0006	0.99584	0.922073	1	0.68518	1	0.355871	1	0.392437	0.395854	0.255065	0.35957	0.876058	0.169517	0.130739	1	1	1	0.726446	0.971184	1	0.529556	0.742627	0.947608	0.0796005	0.607674	1	0.788571	0.817948	1	0.831447	0.261227	1	0.0294	0.123469	0.790563	0.982274	1	0.265064	0.993217	1.0006	1	0.245361	0.957325	0.986387	0.841898	0.399589
Cluster_LEU3	YOR001W	0.320659	1.00099	0.993076	0.47629	0.206236	0.714176	0.283964	0.83862	0.940021	0.565309	1	0.66702	0.495158	0.320236	0.761775	0.295821	0.410435	1	1	0.127853	0.952427	1	0.919814	0.952047	0.914197	0.915879	0.43589	0.537352	0.327854	0.715341	1	0.485045	0.39632	1	0.3836	0.669066	0.706276	0.970626	1	0.68244	0.042276	1.00099	1	1	0.929878	0.97741	0.969152	0.841271
Cluster_Leucine	YNL104C	0.790345	1.0004	0.997225	1	0.40147	0.977242	0.303735	0.0657483	0.489441	0.897816	1	0.141766	0.825151	0.371416	0.306338	1	0.447604	1	1	0.151906	0.980698	1	0.313258	0.238762	0.964763	0.261446	0.717456	0.532258	0.794165	0.874627	1	0.905809	1	1	1	1	1	0.988149	1	0.821572	0.702276	1.0004	1	1	0.971346	0.990905	0.891617	0.989837
Cluster_Lysine	YGL154C	0.637819	1.0005	0.996533	0.564602	0.865047	0.761962	1	0.195601	0.0722998	0.845623	0.342906	0.0869753	0.88695	0.926231	0.890107	1	0.523793	1	1	0.275698	0.97593	1	0.628941	0.166882	0.956147	0.434	0.94612	1	0.643321	0.845814	1	0.399411	1	1	1	1	1	0.985207	1	0.740426	0.205706	1.0005	1	0.0191072	0.96431	0.988643	0.866402	0.465617
Cluster_MAC1	YJL148W	0.534633	1.00079	0.994457	0.101855	0.799489	0.539429	0.923368	0.153059	0.870829	0.287277	0.489309	0.121309	0.83581	0.448031	0.663561	0.211609	1	1	1	0.349318	0.961761	0.0908957	0.883715	0.253352	0.930754	0.557183	0.514673	1	0.0848363	0.764931	1	0.772956	1	1	1	0.200772	0.875653	0.976434	1	0.800338	0.31671	1.00079	1	0.31298	0.943503	0.981888	0.794943	0.29428
Cluster_MAL13	YGR060W	0.722808	1.00149	0.989629	0.0114229	0.194907	0.987197	0.62392	0.860814	0.532512	0.340561	0.343372	0.446163	0.65815	0.0243207	0.439743	0.820787	0.892137	1	1	0.315608	0.929479	0.635172	0.230964	0.718987	0.874068	0.966908	0.661704	0.494499	0.53965	0.604943	1	0.173196	1	1	0.516146	1	0.462526	0.956254	1	0.839838	0.615336	1.00149	1	1	0.896658	0.966299	0.650226	0.350978
Cluster_MAL33	YAL013W	0.327936	1.00199	0.986192	0.385512	0.326603	0.842261	0.679181	0.880641	0.832465	0.432825	0.486972	0.956828	0.411131	0.871776	0.592835	0.163683	1	1	1	0.318068	0.995842	0.376543	0.609782	0.994758	0.986512	0.788619	0.789945	0.697919	0.514345	0.973374	1	0.237463	0.635758	1	1	0.349593	0.962155	0.998427	1	0.417972	0.852157	1.00199	1	1	0.990969	0.955308	0.563235	0.445918
Cluster_Maltose	YBR299W	1	1.0001	0.999306	1	1	1	1	0.506447	1	0.855683	1	1	1	1	1	1	1	1	1	0.375322	0.99514	1	1	0.699068	0.991073	1	0.920353	0.172982	0.577663	1	1	1	1	1	1	1	1	0.997024	1	0.801527	0.728923	1.0001	1	1	0.992759	0.997719	0.971732	1
Cluster_ManualAFT1targets	YOR316C	0.431782	1.0004	0.997225	1	0.40147	0.434975	1	0.0657483	0.489441	0.536054	0.285323	0.836231	0.825151	0.788904	0.995712	0.367568	1	1	1	0.151906	0.980698	1	0.948215	0.238762	0.964763	0.917927	0.717456	0.140779	0.436974	0.874627	1	0.236045	1	0.0220366	1	0.357376	0.0399094	0.988149	1	0.973409	0.994609	1.0004	1	1	0.971346	0.990905	0.891617	0.542547
Cluster_ManualG1genes	YIL026C	0.940859	1.00309	0.978668	0.799399	0.191147	0.9789	0.489539	0.935142	0.992536	0.972961	0.725335	0.716173	0.0458309	0.940804	0.985873	0.667066	0.2492	1	1	0.241954	0.990164	0.327115	0.866674	0.99025	0.969011	0.984907	0.990413	0.923144	0.810161	0.728008	1	0.544003	1	1	1	0.643696	0.15297	0.911632	1	0.110409	0.999007	1.00309	1	0.0514957	0.798027	0.931549	0.943863	0.937593
Cluster_ManualHAP1targets	YLR153C	0.972722	1.00309	0.978668	0.799399	0.107122	0.6384	0.0579681	0.666892	0.992536	0.049427	0.460847	0.296582	0.411667	0.998996	0.157309	0.436148	0.820796	1	1	0.513744	0.859626	0.875767	0.93269	0.804722	0.757002	0.626228	0.0760067	0.809185	0.00643859	0.919237	1	0.166384	0.791179	1	0.777219	0.219063	0.15297	0.911632	1	0.234658	0.527959	1.00309	1	0.418817	0.798027	0.931549	0.41054	0.164173
Cluster_ManualMethionine	YJR139C	0.580904	1.00189	0.986879	0.842471	0.268579	0.983894	0.630092	0.092341	0.438944	0.469192	0.193353	0.991782	0.944373	0.898249	0.441227	1	0.109896	1	1	0.610075	0.911512	0.721261	0.820284	0.279032	0.98779	0.727921	0.546165	0.221287	0.241761	0.976815	1	0.818314	0.616873	1	0.601382	0.605901	0.123103	0.944905	1	0.241668	0.382844	1.00189	1	0.590188	0.870928	0.957497	0.900627	0.957901
Cluster_ManualM-G1genes	YOR099W	0.294424	1.0005	0.996533	0.564602	1	0.761962	0.418873	0.970743	0.0722998	0.845623	1	0.360927	1	0.697353	0.890107	0.436032	1	1	1	0.619166	0.97593	1	0.628941	0.526281	0.956147	0.765314	0.94612	0.613201	0.299409	0.845814	1	0.399411	0.0218746	1	1	1	0.728204	0.985207	1	0.330739	0.205706	1.0005	1	1	0.96431	0.988643	0.866402	0.465617
Cluster_ManualYap1Targets	YDL131W	0.0230058	1.00329	0.977305	0.626685	0.0210562	0.571372	0.28034	0.529796	0.0387621	0.125618	0.756932	0.211939	0.373617	0.238165	0.521343	0.282801	0.852477	1	1	0.0709134	0.851265	0.891432	0.38424	0.59484	0.743505	0.224262	0.0643465	0.698349	0.308744	0.330625	1	0.389668	0.487967	1	0.466109	0.873875	0.659366	0.906198	1	0.187361	0.597001	1.00329	1.00001	0.450509	0.786476	0.92729	0.760884	0.489011
Cluster_ManualZAP1targets	YDR284C	0.408294	1.00139	0.990317	0.565981	0.513786	0.0541911	0.78402	0.917991	0.450885	0.112648	0.691597	0.528378	0.369424	0.630574	0.0158732	1	0.594273	1	1	0.653396	0.934025	1	0.885224	0.581164	0.881952	0.296213	0.312625	0.212855	0.092972	0.625572	1	0.65142	1	1	1	0.439129	0.865478	0.959112	1	0.873571	0.677421	1.00139	1	0.132695	0.903207	0.968511	0.669169	0.117498
Cluster_ManualZAP1targets-2	YDR284C	0.858771	1.00359	0.975264	0.626712	0.799171	0.166985	0.901134	0.893888	0.517573	0.0910323	0.563017	0.813615	0.523591	0.29624	0.00892674	0.913438	0.56605	1	1	0.850822	0.838871	0.91131	0.826667	0.461333	0.723705	0.10351	0.206854	0.0146624	0.104019	0.298923	1	0.123763	1	1	1	0.322868	0.750935	0.898105	1	0.409298	0.619549	1.00359	1.00001	0.227134	0.769459	0.920937	0.355533	0.407769
Cluster_MATa1	YAL022C	0.694711	1.00109	0.992385	0.564375	0.758793	0.864811	0.356091	0.517456	0.959615	0.179905	0.00870664	0.138016	0.583652	0.0655616	0.436683	1	0.8046	1	1	0.072021	0.947794	1	0.708307	0.566824	0.906028	0.834717	0.401138	1	0.471327	0.691762	1	0.592241	1	1	0.0922907	0.70373	0.756733	0.967735	1	0.622478	0.15699	1.00109	1	1	0.923138	0.975178	0.729359	0.185964
Cluster_Mating	YNR044W	0.264515	1.00079	0.994457	0.101855	0.251774	0.189134	0.383379	0.863864	0.870829	0.981375	0.489309	0.121309	0.30065	0.448031	0.352213	1	0.694936	1	1	0.349318	0.961761	1	0.362432	0.804281	0.930754	0.804258	0.871258	0.78129	0.789932	0.764931	1	0.252604	0.332174	1	1	1	0.875653	0.976434	1	0.800338	0.999347	1.00079	1	1	0.943503	0.981888	0.794943	0.683386
Cluster_MBP1	YAL062W	0.602455	1.00209	0.985506	0.902097	0.872586	0.969472	0.723693	0.999396	0.577142	0.9292	0.828841	0.575213	0.912876	0.292164	0.936008	0.680042	0.153223	1	1	0.119746	0.902656	0.400128	0.558786	0.999889	0.828207	0.924874	0.919321	0.900332	0.765916	0.849109	1	0.307358	1	1	0.638203	0.66122	0.891434	0.939279	1	0.18285	0.815088	1.00209	1	1	0.858337	0.953125	0.547282	0.180062
Cluster_MCM1	YAL040C	0.0884411	1.00109	0.992385	0.322142	0.280593	0.35919	0.618177	0.894942	0.0208728	0.514057	1	0.570454	0.806327	0.793768	0.436683	0.716478	1	1	1	0.642591	0.947794	0.522547	0.449452	0.787747	0.906028	0.834717	0.401138	0.106549	0.702116	0.951137	1	0.801493	0.0990348	1	1	0.70373	0.47922	0.967735	1	0.951151	0.391827	1.00109	1	0.403242	0.923138	0.975178	0.96299	0.803541
Cluster_MET31	YAL012W	0.956914	1.00109	0.992385	0.936558	0.280593	0.991527	0.356091	0.000559196	0.959615	0.179905	0.603123	0.7829	0.340293	0.553491	0.184849	1	0.8046	1	1	0.844911	0.947794	1	0.0410368	0.0194397	0.906028	0.834717	0.401138	0.876357	0.471327	0.951137	1	0.592241	1	1	1	1	0.0227234	0.967735	1	0.622478	0.653918	1.00109	1	0.403242	0.923138	0.975178	0.729359	0.524176
Cluster_MET4	YPR145W	0.529893	1.00149	0.989629	0.637066	0.370861	0.693333	0.207369	0.321441	0.0229943	0.340561	0.343372	0.973846	0.253801	0.782708	0.439743	1	0.892137	1	1	0.958869	0.929479	0.254377	0.230964	0.293983	0.874068	0.901144	0.661704	0.760632	0.336068	0.914374	1	0.334576	0.53105	1	1	0.809707	0.106519	0.956254	1	0.170476	0.387658	1.00149	1	1	0.896658	0.966299	0.650226	0.350978
Cluster_MIG1	YAL011W	0.529893	1.00149	0.989629	0.819927	0.194907	0.865774	0.62392	0.860814	0.880975	0.62909	0.343372	0.651701	0.834169	0.329086	0.666585	1	0.141478	1	1	0.720894	0.929479	0.635172	0.680489	0.867255	0.874068	0.213925	0.661704	0.760632	0.53965	0.914374	1	0.535143	1	1	0.031144	0.475592	0.890386	0.956254	1	0.170476	0.183665	1.00149	1	0.505452	0.896658	0.966299	0.650226	0.350978
Cluster_Mitochondria	YNL064C	0.828288	1.00239	0.98345	0.173025	0.978578	0.851371	0.502252	0.291902	0.428872	0.119546	0.30419	0.0527005	0.655293	0.56467	0.225865	0.936199	0.662105	1	1	0.733726	0.88953	0.468146	0.59929	0.560703	0.806177	0.861766	0.419493	0.810697	0.137101	0.447285	1	0.125287	0.702449	1	0.314237	0.929769	0.164691	0.930901	1	0.816614	0.962277	1.00239	1	0.0949708	0.839787	0.946602	0.970828	0.0254047
Cluster_MitochondrialRPs	YBL090W	0.471473	1.00369	0.974584	0.102563	0.0157484	0.751137	0.836611	0.281332	0.998983	0.198145	0.581997	0.398944	0.0656234	0.417557	0.872078	0.578902	0.127965	1	1	0.0600269	0.83478	0.703136	0.798986	0.561375	0.717221	0.588934	0.65981	0.0931298	0.240762	0.289044	1	0.627508	0.549701	1	0.833497	0.759044	0.211009	0.895423	1	0.115804	0.579771	1.00369	1.00001	0.824261	0.763868	0.918829	0.914066	0.210377
Cluster_MOT3	YBR083W	0.783907	1.0006	0.99584	1	0.642269	0.68518	1	0.896621	1	0.392437	1	0.839222	0.687148	0.976403	0.519721	1	1	1	1	0.404605	0.971184	1	0.827711	0.928847	0.947608	0.587968	0.607674	0.278489	0.788571	0.817948	1	0.831447	1	1	0.251928	0.484884	0.790563	0.982274	1	0.265064	0.993217	1.0006	1	0.245361	0.957325	0.986387	0.988921	0.795758
Cluster_mRNAprocessing	YDR228C	0.282972	1.0058	0.960407	0.760858	0.564945	0.885468	0.655865	0.689157	0.964093	0.537013	0.0410402	0.0528039	0.865014	0.1521	0.863962	0.440504	0.916972	1	1	0.000341125	0.753234	0.17301	0.811612	0.92392	0.593593	0.956761	0.310896	0.895404	0.789039	0.142602	1	0.733357	0.786361	0.276732	0.766492	0.739805	0.706749	0.840857	1	0.0417684	0.599207	1.0058	1.00002	0.934685	0.655285	0.875603	0.774764	0.00773674
Cluster_MSS11	YPR001W	0.17513	1.00119	0.991696	0.643544	0.812586	0.942593	0.882407	0.404709	0.0419402	0.755273	0.635122	0.0988752	0.088471	0.490959	0.372193	1	0.50794	1	1	0.971082	0.998519	0.5536	0.943919	0.721279	0.995093	0.730953	0.935617	0.138871	0.604653	0.942612	1	0.251244	1	1	0.440488	0.734766	0.288259	0.999445	1	0.563731	0.922769	1.00119	1	0.430618	0.916447	0.999676	0.995932	0.763957
Cluster_MTH1	YAL020C	0.17513	1.00119	0.991696	0.406037	0.943553	0.82592	0.882407	0.982751	0.729034	0.755273	1	0.953453	0.959656	0.22389	0.147381	0.747192	0.50794	1	1	0.490676	0.943182	1	0.384895	0.880802	0.897931	0.295636	0.369154	0.345067	0.604653	0.668957	1	0.251244	1	1	1	0.734766	0.288259	0.964853	1	0.563731	0.582872	1.00119	1	0.430618	0.916447	0.972951	0.708719	0.47622
Cluster_NDD1	YJL148W	0.233347	1.00189	0.986879	0.505422	0.636731	0.722184	0.981676	0.522728	0.00169659	0.217324	0.193353	0.352297	0.944373	0.777431	0.913013	0.886742	0.261286	1	1	0.423251	0.911512	0.352582	0.660897	0.815791	0.843223	0.939406	0.940814	0.422434	0.118953	0.87187	1	0.999784	0.616873	1	1	0.130078	0.44913	0.944905	1	0.241668	0.586506	1.00189	1	1	0.870928	0.957497	0.984514	0.721583
Cluster_NRG1	YAL022C	0.637819	1.0005	0.996533	0.564602	1	0.761962	0.418873	0.512089	0.627115	0.845623	0.0549931	0.360927	0.88695	0.289931	0.620154	1	0.523793	1	1	0.00743541	0.97593	1	0.894592	0.835737	0.956147	0.434	0.660291	0.613201	0.894727	0.845814	1	0.94783	1	1	1	0.424648	0.728204	0.985207	1	0.740426	0.588412	1.0005	1	0.209101	0.96431	0.988643	0.866402	0.465617
Cluster_NuclearProteinTargetting	YIL063C	0.784594	1.00269	0.981398	0.627508	0.14459	0.767413	0.900331	0.241288	0.863602	0.651151	0.0613447	0.944674	0.498318	0.439448	0.615091	0.806248	0.739981	1	0.0674282	0.738621	0.876591	0.0945318	0.634387	0.406993	0.976066	0.784644	0.941015	0.711238	0.366052	0.942223	1	0.426837	1	0.139794	0.132787	0.949633	0.0108316	0.922595	1	0.720559	0.828951	1.00269	1	0.0331059	0.821632	0.940123	0.460588	0.454869
Cluster_PDR1	YBR040W	0.637819	1.0005	0.996533	0.880748	0.532514	0.761962	0.799147	0.820517	0.0722998	0.845623	1	0.360927	0.88695	0.697353	0.998904	0.436032	1	1	1	0.619166	0.97593	1	0.983964	0.835737	0.956147	0.956081	0.94612	0.208486	0.299409	0.845814	1	0.737727	0.222981	1	0.21484	1	0.323624	0.985207	1	0.740426	0.978884	1.0005	1	1	0.96431	0.988643	0.866402	0.850267
Cluster_PentosePhosphate	YGR256W	0.94609	1.0006	0.99584	0.922073	0.313002	0.915526	1	0.355871	0.15225	0.957292	1	0.57265	1	0.876058	0.519721	1	0.58948	1	1	0.726446	0.999657	1	0.827711	0.742627	0.998845	0.587968	0.923372	0.680143	0.994337	0.985146	1	0.831447	1	1	1	0.484884	1	0.999873	1	0.983535	0.950218	1.0006	1	1	0.957325	0.999926	0.988921	0.959283
Cluster_Peroxisome	YLR191W	0.793302	1.00119	0.991696	0.643544	0.597414	0.82592	0.681554	0.818522	0.282401	0.755273	1	0.864958	0.088471	0.22389	0.829846	1	0.50794	1	1	0.490676	0.943182	0.180968	0.838672	0.250432	0.897931	0.514679	0.935617	0.345067	0.180758	0.668957	1	0.859452	0.454316	1	1	0.734766	0.542873	0.964853	1	0.563731	0.328145	1.00119	1	0.102108	0.916447	0.972951	0.708719	0.47622
Cluster_PHD1	YBR158W	0.866257	1.00109	0.992385	0.142483	0.758793	0.657687	0.356091	0.894942	0.203522	0.514057	0.603123	0.329399	0.340293	0.553491	0.875626	0.716478	0.460479	1	1	0.844911	0.947794	1	0.882525	0.920828	0.906028	0.946315	0.401138	0.591537	0.245869	0.691762	1	0.356409	1	1	1	0.70373	0.756733	0.967735	1	0.622478	0.653918	1.00109	1	0.403242	0.923138	0.975178	0.729359	0.803541
Cluster_PHO4	YCL035C	0.892029	1.0005	0.996533	0.564602	0.204905	0.761962	0.799147	0.512089	1	0.845623	0.342906	0.923094	1	0.289931	0.620154	1	0.523793	1	1	0.619166	0.97593	1	0.983964	0.835737	0.956147	0.434	0.94612	0.613201	0.643321	0.845814	1	0.94783	1	1	1	1	0.323624	0.985207	1	0.943292	0.588412	1.0005	1	1	0.96431	0.988643	0.866402	0.465617
Cluster_Phospholipid	YDR497C	0.140617	1.00209	0.985506	0.449406	0.568648	0.424457	0.868874	0.965719	0.868458	0.171815	0.0229912	0.575213	0.305207	0.999525	0.541084	0.90997	0.80695	1	1	0.0533626	0.902656	0.0436371	0.737272	0.850338	0.985177	0.542827	0.492836	0.14099	0.275493	0.969675	1	0.473218	0.653713	1	1	1	0.346137	0.939279	1	0.18285	0.665455	1.00209	1	0.626955	0.858337	0.953125	0.882301	0.411338
Cluster_Polyamine	YKL184W	0.923042	1.0003	0.997918	0.720779	0.699273	0.993379	1	1	0	0.997	1	0.231057	1	0.475788	0.836973	1	1	1	1	0.316842	0.999931	1	0.984043	0.972766	0.999765	0.447117	0.981998	0.434388	0.924699	0.904418	1	0.829957	1	1	1	1	0.542296	0.991099	1	0.992191	1	1.0003	1	1	0.978433	0.993171	0.917562	0.632177
Cluster_primig-EarlySpo	YML102C-a	0.676007	1.00199	0.986192	0.385512	0.0863569	0.682158	0.841221	0.948888	0.188654	0.675273	0.214796	0.152779	0.764427	0.871776	0.390691	0.653439	0.29392	1	0.0011809	0.493372	0.907073	0.739405	0.780164	0.604488	0.835682	0.636873	0.789945	0.697919	0.686123	0.51154	1	0.394237	1	1	0.620238	0.634379	0.87036	0.942088	1	0.809376	0.16713	1.00199	1	1	0.990969	0.955308	0.563235	0.857285
Cluster_primig-LateSpo	YPR077C	0.129301	1.0053	0.963766	0.365613	0.992768	0.58961	0.897309	0.978845	0.994335	0.645875	0.131212	0.507016	0.936746	0.625447	0.734092	0.936411	0.872855	1	1	0.749653	0.771911	0.67842	0.903612	0.972778	0.918954	0.512844	0.94305	0.436529	0.211546	0.970331	1	0.301606	0.742604	0.256192	0.239944	0.0971464	0.0442209	0.85355	1	0.511266	0.94082	1.0053	1.00001	0.7057	0.679669	0.885715	0.217885	0.111784
Cluster_primig-MidSpo	YOR161C	0.327936	1.00199	0.986192	0.385512	0.507907	0.682158	0.297025	0.610768	0.509655	0.675273	0.486972	0.64416	0.128136	0.947415	0.0818253	0.653439	0.534081	1	1	0.318068	0.907073	0.739405	0.894793	0.105243	0.835682	0.293424	0.189837	0.697919	0.915927	0.973374	1	0.979527	0.635758	1	1	0.89061	0.300789	0.942088	1	0.636357	0.531295	1.00199	1	1	0.86461	0.955308	0.563235	0.445918
Cluster_Proline	YER023W	0.431782	1.0004	0.997225	0.43056	0.798541	0.837587	0.723092	0.697146	1	0.536054	0.285323	0.836231	1	0.371416	0.306338	1	1	1	1	0.481779	0.980698	1	0.313258	0.915635	0.964763	0.261446	0.717456	0.140779	0.436974	0.874627	1	0.905809	1	1	0.175917	1	0.227321	0.988149	1	0.821572	0.702276	1.0004	1	1	0.971346	0.990905	0.891617	0.542547
Cluster_Proteasome	YBL041W	0.465119	1.00299	0.97935	0.626922	0.961745	0.812151	0.871181	0.982111	0.759163	0.352974	0.219054	0.638154	0.359296	0.502864	0.483742	0.850992	0.932604	1	1	0.743569	0.863837	1	0.796992	0.959165	0.763841	0.699818	0.914217	0.420039	0.000674955	0.740346	1	0.855395	0.438336	1	0.417451	0.621095	0.549963	0.914361	1	0.0457838	0.91368	1.00299	1	0.156583	0.803865	0.933685	0.422519	0.181331
Cluster_Purine	YMR120C	0.120185	1.00159	0.988941	0.497679	0.120278	0.398196	0.120803	0.0120991	1	0.0824398	0.132974	0.370481	0.0707279	0.284738	0.182343	0.0862792	0.382685	1	1	0.971098	0.924955	1	0.80563	0.0255761	0.866254	0.484667	0.631907	0.540551	0.0453347	0.985592	1	0.245142	0.554155	1	0.539025	0.230722	0.910951	0.953404	1	0.802959	0.957148	1.00159	1	1	0.890156	0.964091	0.631818	0.599371
Cluster_PUT3	YOR272W	0.999725	1.00159	0.988941	0.952195	0.827217	0.936997	0.857543	0.24313	0.911661	0.587446	0.739339	0.023635	0.720361	0.52126	0.608517	0.529456	0.382685	1	1	0.594414	0.924955	0.0171458	0.192357	0.243125	0.866254	0.83387	0.264743	0.128029	0.265511	0.584993	1	0.793355	0.554155	1	0.539025	0.020301	0.984567	0.953404	1	0.357333	0.885713	1.00159	1	0.165012	0.890156	0.964091	0.631818	0.315494
Cluster_Pyrimidine	YJL130C	0.912798	1.00159	0.988941	0.497679	0.441607	0.833399	0.259308	0.788386	0.608468	0.305291	0.739339	0.195678	0.957484	0.737227	0.383485	0.529456	0.66874	1	1	0.391713	0.924955	1	0.192357	0.973901	0.991282	0.484667	0.631907	0.792072	0.265511	0.584993	1	0.621578	1	1	1	0.510573	0.746438	0.953404	1	0.920972	0.986991	1.00159	1	0.528148	0.890156	0.964091	0.631818	0.0865099
Cluster_RAP1	YAL033W	0.793302	1.00119	0.991696	0.643544	0.812586	0.60161	0.882407	0.818522	0.972979	0.755273	0.635122	0.255438	0.219926	0.22389	0.630154	0.747192	1	1	1	0.490676	0.943182	0.0386343	0.15484	0.880802	0.897931	0.730953	0.369154	0.897768	0.0620922	0.668957	1	0.685574	1	1	0.107404	1	0.288259	0.964853	1	0.0701966	0.582872	1.00119	1	0.430618	0.916447	0.972951	0.708719	0.47622
Cluster_RCS1	YFR001W	0.659625	1.00069	0.995149	0.459361	0.168129	0.872274	0.894339	0.78396	0.251466	0.73245	1	0.449947	0.475308	0.954414	0.43005	0.17037	1	1	1	0.243535	0.966461	0.0711578	0.75264	0.644975	0.939144	0.711605	0.559246	0.347969	0.665895	0.790997	1	0.983999	1	1	1	0.0289549	0.201871	0.97935	1	0.212425	0.981571	1.00069	1	1	0.950389	0.984135	0.818085	0.739612
Cluster_REB1	YCR032W	0.911755	1.00179	0.987566	0.917222	0.0132414	0.553938	0.975895	0.13004	0.0989914	0.243837	0.431712	0.420373	0.28166	0.0701188	0.285433	0.594991	0.73174	1	1	0.352364	0.915971	1	0.511328	0.329343	0.850832	0.991374	0.224187	0.0757321	0.303234	0.547039	0.0212267	0.120528	0.0557126	1	0.581593	0.575768	0.214487	0.94773	1	0.276401	0.80816	1.00179	1	0.57047	0.877291	0.95969	0.986686	0.754865
Cluster_RFX1	YBR042C	0.788282	1.00099	0.993076	0.910438	0.0730945	0.899629	0.283964	0.83862	0.940021	0.565309	1	0.855816	0.255705	0.0840015	0.230637	1	1	0.00495049	1	0.789733	0.952427	1	0.520049	0.64716	0.914197	0.915879	0.43589	0.850464	0.133789	0.715341	1	0.0972513	0.0836693	1	1	1	0.926181	0.970626	1	0.380321	0.724794	1.00099	1	1	0.929878	0.97741	0.750599	0.21671
Cluster_RGM1	YCR105W	0.784617	1.00079	0.994457	0.966729	0.799489	0.539429	1	0.967627	0.870829	0.904194	0.131168	0.344523	0.30065	0.448031	0.995206	0.600107	0.694936	1	1	0.631061	0.961761	1	0.673995	0.804281	0.930754	0.946499	0.514673	1	0.541859	0.764931	1	0.252604	1	1	0.320941	1	0.270736	0.976434	1	0.170235	0.625451	1.00079	1	1	0.943503	0.981888	0.794943	0.29428
Cluster_RGT1	YBL074C	0.443669	1.00159	0.988941	0.497679	0.985412	0.980868	0.678886	0.788386	0.911661	0.809549	0.739339	0.75379	0.872105	0.52126	0.383485	0.840209	0.382685	1	1	0.594414	0.997341	0.279115	0.971801	0.992738	0.991282	0.83387	0.631907	0.540551	0.453663	0.9042	1	0.424011	1	1	0.539025	0.230722	0.0162127	0.998999	1	0.604252	0.957148	1.00159	1	1	0.890156	0.999414	0.926348	0.599371
Cluster_RIM101	YBL059W	0.596119	1.00119	0.991696	0.643544	0.597414	0.82592	0.882407	0.997231	0.729034	0.153914	1	0.477321	0.854322	0.899126	0.630154	0.132594	0.50794	1	1	0.490676	0.943182	1	0.384895	0.960854	0.897931	0.886599	0.935617	0.640831	0.0620922	0.668957	1	0.461575	0.454316	1	0.440488	0.362333	0.799505	0.964853	1	0.929574	0.328145	1.00119	1	0.430618	0.916447	0.972951	0.708719	0.47622
Cluster_RLM1	YER001W	0.49173	1.0006	0.99584	0.674125	0.642269	0.286838	0.523291	0.668308	0	0.789789	1	0.255065	0.120979	0.226317	0.519721	0.130739	0.195357	1	1	0.726446	0.971184	0.331785	0.529556	0.742627	0.947608	0.280031	0.607674	1	0.49807	0.817948	1	0.831447	1	1	0.0294	0.484884	0.416408	0.982274	1	0.659115	0.149916	1.0006	1	0.027799	0.957325	0.986387	0.841898	0.399589
Cluster_RME1	YJL148W	0.637819	1.0005	0.996533	0.564602	1	0.761962	0.418873	0.512089	1	0.458662	1	0.705936	1	0.697353	0.620154	1	0.523793	1	1	0.275698	0.97593	1	0.894592	0.835737	0.956147	0.956081	0.660291	0.613201	0.643321	0.845814	1	0.94783	1	1	1	1	1	0.985207	1	0.943292	0.873071	1.0005	1	1	0.96431	0.988643	0.866402	0.465617
Cluster_RNAPol	YPR010C	0.844321	1.00299	0.97935	0.329437	0.399856	0.494494	0.995134	0.455799	0.931887	0.056221	1	0.862352	0.884034	0.502864	0.18201	0.96797	0.802884	0.0147926	1	0.315728	0.863837	0.589247	0.0937543	0.156508	0.763841	0.417361	0.297737	0.611612	0.0588915	0.365678	1	0.995521	0.78034	0.154088	0.766145	0.385496	0.379909	0.914361	1	0.0109656	0.572102	1.00299	1	0.755685	0.803865	0.933685	0.99861	0.181331
Cluster_ROX1	YJL148W	0.574588	1.0001	0.999306	1	1	0.81214	1	0.506447	1	0.855683	1	1	1	0.780698	0.743999	0.108213	1	1	1	1	0.99514	1	1	0.699068	0.991073	1	0.920353	1	0.577663	0.96707	1	0.445943	1	1	1	1	1	0.997024	1	0.801527	0.728923	1.0001	1	1	0.992759	0.997719	0.971732	0.858262
Cluster_RPH1	YJL148W	0.61992	1.00139	0.990317	0.771164	0.016196	0.229963	1	0.226267	0.841388	0.379031	0.691597	0.31559	0.920014	0.82542	0.263994	0.799006	0.87486	1	1	0.242525	0.934025	0.229686	0.275691	0.352188	0.881952	0.498613	0.691917	0.212855	0.224728	0.924192	1	0.981766	1	0.0750629	0.492135	1	0.40514	0.959112	1	0.0450699	0.996072	1.00139	1	1	0.903207	0.968511	0.669169	0.117498
Cluster_RPs	YLR075W	0.421734	1.00884	0.940461	0.246526	0.788504	0.507819	0.984316	0.50593	0.805308	0.490021	0.0948632	0.632128	0.161555	0.000115503	0.690932	0.485236	0.967916	1	1	0.709676	0.650118	0.0267139	0.0253276	0.245772	0.4527	0.993252	0.839083	0.569374	0.615648	0.0518381	1	0.392016	0.988428	1	0.00831502	0.580797	0.0902553	0.768448	1	0.0117876	0.378395	1.00884	1.00004	0.0481119	0.526092	0.817212	0.544677	0.0100738
Cluster_rRNAprocessing	YHR069C	0.0723321	1.00289	0.980032	0.168127	0.501942	0.921279	0.931758	0.990032	0.986031	0.380564	0.69033	0.260784	0.308019	0.205428	0.101685	0.62133	0.0379403	1	1	0.984284	0.868068	0.290727	0.110774	0.970151	0.770741	0.350262	0.0897767	0.579683	0.392948	0.752677	1	0.701874	1	1	0.754522	0.597535	0.341123	0.917098	1	0.471501	0.988082	1.00289	1	0.145572	0.809745	0.935826	0.434847	0.199991
Cluster_RTG1	YAL029C	0.42857	1.00209	0.985506	0.630281	0.568648	0.917404	0.536744	0.999396	0.868458	0.171815	1	0.575213	0.305207	0.498137	0.0662849	0.0688553	0.80695	1	1	0.119746	0.902656	0.152486	0.0717757	0.973131	0.828207	0.542827	0.768382	0.29203	0.0651609	0.849109	1	0.307358	0.653713	1	1	0.170774	0.187417	0.939279	1	0.0593384	0.138625	1.00209	1	0.626955	0.858337	0.953125	0.547282	0.833262
Cluster_RTG3	YBR167C	0.94609	1.0006	0.99584	0.11344	0.313002	0.68518	0.0520177	1	0.15225	0.957292	1	0.96503	0.35957	0.876058	0.519721	0.130739	1	1	1	0.404605	0.971184	1	0.175294	0.988927	0.947608	0.9765	0.607674	1	0.49807	0.817948	1	0.831447	1	1	1	0.123469	0.138057	0.982274	1	0.265064	0.149916	1.0006	1	1	0.957325	0.986387	0.841898	0.795758
Cluster_RTS2	YDR004W	0.790345	1.0004	0.997225	0.817519	0.798541	0.837587	0.723092	0.322196	1	0.536054	0.285323	0.836231	0.442883	0.371416	0.728135	0.367568	1	1	1	0.0198238	0.980698	0.235655	0.313258	0.650063	0.964763	0.261446	0.717456	0.532258	0.111304	0.874627	1	0.602401	1	1	1	1	1	0.988149	1	0.412676	0.702276	1.0004	1	1	0.971346	0.990905	0.995399	0.901067
Cluster_SFL1	YCR083W	0.94609	1.0006	0.99584	0.345556	0.909603	0.286838	0.523291	0.355871	0.733868	0.392437	1	0.57265	0.687148	0.608001	0.519721	1	0.58948	1	1	0.940633	0.971184	1	0.961473	0.418109	0.947608	0.587968	0.607674	1	0.200078	0.985146	1	0.971106	1	1	0.251928	1	0.138057	0.982274	1	0.659115	0.795925	1.0006	1	0.245361	0.957325	0.986387	0.841898	0.399589
Cluster_SFP1	YAL022C	0.239356	1.00109	0.992385	0.322142	0.758793	0.657687	0.970772	0.121677	0.0208728	0.514057	0.0526839	0.0367611	0.583652	0.268401	0.184849	0.337618	0.8046	1	1	0.399396	0.947794	0.522547	0.708307	0.111622	0.906028	0.640839	0.401138	0.876357	0.702116	0.691762	1	0.985158	1	1	1	0.0995989	0.943126	0.967735	1	0.326509	0.848827	1.00109	1	0.403242	0.923138	0.975178	0.96299	0.803541
Cluster_SIG1	YGR222W	0.865187	1.00129	0.991006	0.274411	0.855829	0.977629	0.736724	0.8766	0.98202	0.713507	0.664544	0.614496	0.292812	0.0399335	0.116974	0.774582	0.262422	1	1	0.576213	0.938593	1	0.917435	0.936783	0.889906	0.615192	0.339717	0.915473	0.508122	0.646902	1	0.902259	1	1	1	0.762554	0.346641	0.961978	1	0.752095	0.0955441	1.00129	1	0.45674	0.909803	0.970729	0.688661	0.431317
Cluster_SIP4	YAL010C	0.676007	1.00199	0.986192	0.385512	0.181543	0.682158	0.679181	0.880641	0.509655	0.849022	1	0.897577	0.128136	0.152609	0.207187	0.163683	0.784249	1	1	0.318068	0.907073	0.739405	0.957419	0.951243	0.835682	0.636873	0.519079	0.884124	0.915927	0.51154	1	0.237463	0.635758	1	0.24313	0.634379	0.0662619	0.942088	1	0.417972	0.715332	1.00199	1	0.232707	0.86461	0.955308	0.563235	0.687658
Cluster_SKN7	YDR156W	0.462938	1.00109	0.992385	0.936558	0.517908	0.35919	0.848932	0.121677	0.653821	0.514057	1	0.570454	0.991751	0.268401	0.436683	0.716478	0.8046	1	1	0.194851	0.947794	1	0.96456	0.111622	0.906028	0.200596	0.783408	0.591537	0.471327	0.951137	1	0.801493	1	1	1	0.70373	0.0840636	0.967735	1	0.842338	0.950239	1.00109	1	0.403242	0.923138	0.975178	0.96299	0.524176
Cluster_SKO1	YKL210W	0.659625	1.00069	0.995149	0.459361	0.730514	0.610343	0.894339	0.941686	0.251466	0.335768	0.103735	0.736255	0.475308	0.524285	0.43005	0.551545	0.249688	1	1	0.243535	0.966461	1	0.440323	0.97086	0.939144	0.987427	0.559246	0.347969	0.0214319	0.790997	1	0.383089	1	1	1	1	0.201871	0.97935	1	0.854654	0.393895	1.00069	1	1	0.950389	0.984135	0.818085	0.739612
Cluster_SMP1	YER001W	0.877119	1.00069	0.995149	0.94908	1	0.610343	0.296029	0.78396	0.251466	0.933137	0.444541	0.0327314	0.475308	0.176656	0.7439	0.551545	0.646112	1	1	0.243535	0.966461	1	0.440323	0.644975	0.939144	0.711605	0.559246	0.347969	0.880578	0.790997	1	0.89375	1	1	0.287268	0.538819	0.83862	0.97935	1	0.212425	0.981571	1.00069	1	0.0377529	0.950389	0.984135	0.984777	0.342918
Cluster_SOK2	YBL029W	0.419711	1.00089	0.993766	0.654288	0.614651	0.473605	0.467879	0.982253	0.0783118	0.871166	1	0.082179	0.980255	0.379993	0.0697619	1	0.115849	1	1	0.455062	0.957083	1	0.830921	0.974366	0.922439	0.00100619	0.473648	0.478387	0.685177	0.739722	1	0.844804	1	1	1	1	0.64735	0.973526	1	0.98109	0.541753	1.00089	1	0.0609233	0.936666	0.979647	0.772454	0.62823
Cluster_sphingolipids	YBR265W	0.637819	1.0005	0.996533	0.564602	0.532514	0.353229	1	0.512089	1	0.845623	0.342906	0.923094	0.240274	0.697353	0.620154	1	0.523793	1	1	0.275698	0.97593	1	0.894592	0.526281	0.956147	0.434	0.94612	1	0.986581	0.845814	1	0.737727	1	1	1	1	0.728204	0.985207	1	0.330739	0.873071	1.0005	1	1	0.96431	0.988643	0.866402	0.850267
Cluster_SRD1	YBR167C	0.397998	1.00189	0.986879	0.0819042	0.917062	0.995726	0.808813	0.696544	0.140137	0.710023	0.797474	0.352297	0.713786	0.0572589	0.913013	0.33908	0.940474	1	1	0.896758	0.911512	0.721261	0.820284	0.470213	0.843223	0.979301	0.546165	0.422434	0.408616	0.87187	1	0.31585	0.616873	1	0.601382	0.605901	0.664723	0.944905	1	0.841483	0.8852	1.00189	1	0.590188	0.870928	0.957497	0.579652	0.721583
Cluster_STB1	YCR065W	0.877119	1.00069	0.995149	0.193814	0.0433164	0.610343	0.894339	0.941686	0	0.335768	0.444541	0.736255	0.205253	0.524285	0.985711	1	1	1	1	0.962928	0.966461	0.375223	0.75264	0.872829	0.939144	0.987427	0.898244	0.104788	0.665895	0.790997	1	0.675688	1	1	1	1	0.201871	0.97935	1	0.854654	0.109253	1.00069	1	1	0.950389	0.984135	0.818085	0.739612
Cluster_STE12	YBR083W	0.264515	1.00079	0.994457	0.0239422	0.251774	0.823085	0.383379	0.863864	0.870829	0.675202	0.489309	0.625653	0.580103	0.448031	0.663561	0.211609	0.304341	1	1	0.349318	0.961761	1	0.673995	0.941378	0.930754	0.557183	0.979199	0.78129	0.270407	0.764931	1	0.772956	1	1	1	0.587111	0.0870959	0.976434	1	0.507753	0.31671	1.00079	1	0.31298	0.943503	0.981888	0.794943	0.29428
Cluster_Sterols	YHR190W	0.912347	1.00239	0.98345	0.889083	0.242319	0.0442355	0.0411765	0.750316	0.939885	0.53668	0.5868	0.54432	0.192444	0.939126	0.0345452	0.749919	0.228742	1	1	0.855706	0.88953	1	0.943069	0.845039	0.806177	0.441705	0.136106	0.937127	0.137101	0.813685	1	0.369393	1	1	1	0.732273	0.67414	0.930901	1	0.0341735	0.513182	1.00239	1	1	0.839787	0.946602	0.853433	0.551333
Cluster_STP1	YBR216C	0.61992	1.00139	0.990317	0.565981	0.513786	0.0541911	0.78402	0.226267	0.988092	0.379031	1	0.873834	0.0791195	0.153928	0.500234	0.799006	0.594273	1	1	0.0386456	0.934025	1	0.514836	0.352188	0.881952	0.702625	0.691917	0.725147	0.224728	0.625572	1	0.65142	0.148959	1	0.139335	0.439129	0.200392	0.959112	1	0.201563	0.847742	1.00139	1	0.481667	0.903207	0.968511	0.669169	0.874849
Cluster_STP2	YBR040W	0.0623401	1.00149	0.989629	0.819927	0.194907	0.693333	0.396611	0.520264	0.167893	0.62909	0.343372	0.651701	0.446506	0.12698	0.838266	0.820787	1	1	1	0.720894	0.929479	1	0.680489	0.125065	0.874068	0.593426	0.888307	0.494499	0.169057	0.604943	1	0.728939	1	1	0.516146	0.809707	0.106519	0.956254	1	0.653929	0.183665	1.00149	1	1	0.896658	0.966299	0.999333	0.350978
Cluster_SUM1	YAL023C	0.00787569	1.00129	0.991006	0.274411	0.66844	0.920695	0.497654	0.306821	0.98202	0.131675	1	0.919286	0.509681	0.185984	0.911611	1	0.55258	1	1	0.576213	0.938593	0.205169	0.578092	0.200279	0.889906	0.923618	0.339717	0.0586604	0.870127	0.933617	1	0.561474	1	1	1	0.401315	0.601743	0.961978	1	0.237581	0.0955441	1.00129	1	1	0.909803	0.970729	0.688661	0.723182
Cluster_SWI4	YER001W	0.140617	1.00209	0.985506	0.15337	0.386425	0.812204	0.954017	0.965719	0.0581497	0.640287	0.828841	0.398279	0.655282	0.498137	0.992282	0.90997	0.153223	1	1	0.383855	0.902656	0.756368	0.558786	0.931345	0.828207	0.838595	0.995195	0.900332	0.439915	0.849109	1	0.473218	0.653713	1	1	0.90208	0.0337092	0.939279	1	0.0593384	0.288275	1.00209	1	0.626955	0.858337	0.953125	0.882301	0.653398
Cluster_SWI5	YAL017W	0.408294	1.00139	0.990317	0.911876	0.142943	0.894999	0.929708	0.917991	0.450885	0.671265	1	0.146662	0.787231	0.378319	0.956935	0.457062	0.87486	1	1	0.437284	0.934025	1	0.736234	0.905518	0.881952	0.296213	0.691917	0.725147	0.224728	0.625572	1	0.248507	0.0287179	1	0.0257987	0.439129	0.0786147	0.959112	1	0.95772	0.677421	1.00139	1	0.00301792	0.903207	0.968511	0.669169	0.389567
Cluster_SWI6	YBR078W	0.987111	1.00129	0.991006	0.881723	0.855829	0.783798	0.736724	0.958286	0.98202	0.970726	0.282057	0.801577	0.972038	0.432374	0.911611	0.774582	0.0244102	1	1	0.576213	0.938593	0.582636	0.917435	0.936783	0.889906	0.979001	0.984046	0.915473	0.987852	0.992084	1	0.902259	1	1	1	0.762554	0.601743	0.961978	1	0.237581	0.513815	1.00129	1	0.45674	0.909803	0.970729	0.688661	0.136932
Cluster_TFs	YBL066C	0.431782	1.0004	0.997225	0.43056	1	0.977242	0.723092	0.697146	1	0.897816	1	0.498931	0.825151	0.788904	0.995712	1	0.447604	1	1	1	0.980698	1	0.735202	0.650063	0.964763	0.917927	0.717456	0.532258	0.794165	0.874627	1	1	0.18276	1	1	1	1	0.988149	1	0.973409	0.936559	1.0004	1	1	0.971346	0.990905	0.891617	0.542547
Cluster_THI2	YBL058W	0.320659	1.00099	0.993076	0.910438	0.693097	0.899629	0.283964	0.990369	0.940021	0.210283	1	0.66702	0.987237	0.320236	0.761775	0.0849354	1	1	1	0.127853	0.952427	0.489338	0.0548683	0.848238	0.996615	0.915879	0.960458	0.850464	0.0343225	0.715341	1	0.895976	1	1	0.0097862	0.281913	0.411647	0.970626	1	0.109321	0.894924	1.00099	1	1	0.929878	0.97741	0.750599	0.841271
Cluster_Thiamine	YPR121W	0.431782	1.0004	0.997225	0.43056	0.40147	0.434975	0.723092	0.697146	0.489441	0.897816	1	0.836231	0.442883	0.788904	0.306338	0.367568	1	1	1	0.847781	0.980698	1	0.735202	0.915635	0.964763	0.261446	0.717456	1	0.436974	0.874627	1	0.236045	0.18276	1	1	1	1	0.988149	1	0.412676	0.702276	1.0004	1	1	0.971346	0.990905	0.891617	0.901067
Cluster_tRNAprocessing	YNL292W	0.182414	1.00199	0.986192	0.744015	0.326603	0.93476	0.986101	0.434689	1	0.849022	0.813816	0.0648873	0.764427	0.544986	0.592835	0.899021	0.534081	1	1	0.493372	0.907073	0.376543	0.407287	0.769615	0.986512	0.293424	0.189837	0.464026	0.514345	0.860592	1	0.57135	0.635758	1	1	0.634379	0.87036	0.942088	1	0.809376	0.33336	1.00199	1	0.609002	0.86461	0.955308	0.563235	0.687658
Cluster_tRNAsynth	YDR341C	0.388638	1.00239	0.98345	0.628565	0.391811	0.520464	0.502252	0.000940873	0.939885	0.53668	0.5868	0.825624	0.017802	0.369096	0.744393	0.11021	0.426541	1	1	0.261328	0.88953	0.202029	0.59929	0.108977	0.806177	0.861766	0.880982	0.616504	0.715778	0.813685	1	0.369393	0.702449	1	0.687168	0.929769	0.67414	0.930901	1	0.11769	0.179624	1.00239	1	0.0949708	0.839787	0.946602	0.853433	0.0254047
Cluster_Tryptophan	YDR354W	0.1296	1.00099	0.993076	0.730573	0.431612	0.413463	0.546699	0.0118951	0.940021	0.210283	1	0.417055	0.745598	0.619021	0.761775	1	1	1	1	0.936681	0.952427	0.134185	0.0548683	0.147732	0.914197	0.915879	0.960458	0.850464	0.576231	0.715341	1	0.485045	1	1	0.0778725	0.281913	0.411647	0.970626	0.00396216	0.68244	0.724794	1.00099	1	1	0.929878	0.97741	0.750599	0.57497
Cluster_UGA3	YBR018C	0.798951	1.00139	0.990317	0.565981	0.30048	0.739317	0.929708	0.623599	0.988092	0.379031	0.312864	0.873834	0.0791195	0.630574	0.500234	0.799006	0.87486	1	1	0.0386456	0.934025	0.229686	0.736234	0.581164	0.881952	0.498613	0.312625	0.446242	0.224728	0.625572	1	0.112623	1	1	1	0.439129	0.200392	0.959112	1	0.201563	0.224464	1.00139	1	1	0.903207	0.968511	0.669169	0.117498
Cluster_USV1	YAL001C	0.596119	1.00119	0.991696	0.643544	0.358897	0.60161	0.428047	0.404709	0.972979	0.979611	0.251132	0.0243382	0.0269709	0.899126	0.829846	0.747192	0.50794	1	1	0.271604	0.943182	1	0.838672	0.250432	0.897931	0.514679	0.752966	0.138871	0.376093	0.668957	1	0.461575	1	1	0.107404	0.122897	0.542873	0.964853	1	0.279064	0.995196	1.00119	1	0.430618	0.916447	0.972951	0.708719	0.47622
Cluster_Vacuole	YBR127C	0.463081	1.0049	0.966461	0.913315	0.689673	0.160387	0.827762	0.996463	0.984385	0.0627884	0.199072	0.0946153	0.471752	0.00273328	0.632003	0.62369	0.3617	1	1	0.178427	0.787179	0.0376436	0.765997	0.806573	0.643759	0.308999	0.444772	0.630247	0.034322	0.923042	1	0.939758	0.0320253	1	0.40968	0.407496	0.823479	0.863837	1	0.0570962	0.95009	1.0049	1.00001	0.18563	0.699818	0.893885	0.95094	0.156839
Node 1	YAR015W	0.637819	1.0005	0.996533	0.880748	0.204905	0.353229	0.131027	0.195601	0.627115	0.845623	1	0.705936	0.88695	0.697353	0.620154	0.436032	1	1	1	0.619166	0.97593	1	0.894592	0.166882	0.956147	1	0.660291	0.208486	0.299409	0.845814	1	0.737727	0.222981	1	1	1	0.728204	0.985207	1	0.330739	0.873071	1.0005	1	1	0.96431	0.988643	0.866402	0.977268
Node 10	YCR082W	0.419711	1.00089	0.993766	0.874465	0.341462	0.153575	0.754921	0.758722	1	0.619212	0.530472	0.258264	0.980255	0.686165	0.0697619	0.0644853	0.737028	1	1	0.71906	0.957083	1	0.830921	0.727591	0.922439	0.189386	0.473648	0.819153	0.192008	0.739722	1	0.959504	1	1	1	1	1	0.973526	1	0.136421	0.541753	1.00089	1	0.344488	0.936666	0.979647	0.772454	0.62823
Node 11	YOR027W	0.790345	1.0004	0.997225	1	0.798541	0.434975	0.723092	0.322196	1	0.897816	1	0.141766	0.825151	0.788904	0.728135	1	1	1	1	0.481779	0.980698	1	0.735202	0.650063	0.964763	0.632788	0.717456	1	0.968211	0.874627	1	0.602401	1	1	1	1	0.647288	0.988149	1	0.973409	0.936559	1.0004	1	1	0.971346	0.990905	0.891617	0.542547
Node 12	YDR258C	0.923042	1.0003	0.997918	0.720779	1	0.535628	1	0.87981	0.322996	0.626495	1	0.942366	0.729584	0.876843	0.411787	1	1	1	1	0.316842	0.985489	1	0.841708	0.341587	0.973455	0.846643	0.779565	0.0051687	0.615569	0.904418	1	0.419223	1	1	1	0.0305361	0.0120473	0.991099	1	0.5149	0.819417	1.0003	1	0.131282	0.978433	0.993171	0.917562	0.945452
Node 13	YDR099W	0.659625	1.00069	0.995149	0.760031	0.168129	0.610343	0.894339	0.78396	0.251466	0.933137	1	0.449947	0.475308	0.524285	0.923843	1	1	1	1	0.525407	0.966461	1	0.75264	0.644975	0.939144	0.910939	0.986191	0.735505	0.665895	0.790997	1	0.675688	0.297594	1	1	0.538819	1	0.97935	1	0.854654	0.393895	1.00069	1	1	0.950389	0.984135	0.818085	0.739612
Node 14	YDR237W	0.120185	1.00159	0.988941	0.0210899	0.252953	0.833399	0.678886	0.618401	1	0.0824398	1	0.195678	0.321871	0.737227	0.794335	0.529456	0.90703	1	1	0.0112166	0.924955	0.65891	0.623607	0.656784	0.866254	0.83387	0.264743	0.0443218	0.125215	0.985592	1	0.117238	0.184473	1	0.539025	0.82965	0.296666	0.953404	1	0.357333	0.332339	1.00159	1	0.528148	0.890156	0.964091	0.631818	0.315494
Node 15	YGR076C	0.1296	1.00099	0.993076	0.0905903	0.431612	0.974637	0.806977	0.392863	0.940021	0.565309	0.568321	0.417055	0.495158	0.842832	0.914771	1	1	1	1	0.554157	0.952427	1	0.919814	0.64716	0.914197	0.533711	0.813473	0.078133	0.576231	0.959149	1	0.485045	0.39632	1	1	0.669066	0.177857	0.970626	1	0.68244	0.199688	1.00099	1	0.374553	0.929878	0.97741	0.750599	0.841271
Node 16	YER059W	0.819049	1.0002	0.998612	1	1	0.659557	1	0.75643	0.144139	0.732182	1	0.376565	0.581806	0.951924	0.553516	1	0.256743	1	1	0.609801	0.990303	1	0.936598	0.488675	0.982225	0.713467	0.847043	0.316055	0.333671	0.935221	1	0.693046	1	1	1	0.198343	1	0.994057	1	0.642431	1	1.0002	1	1	0.98557	0.995442	0.94426	0.736602
Node 17	YKL096W	0.819049	1.0002	0.998612	0.119943	1	0.659557	1	0.256464	1	0.732182	1	1	1	0.951924	0.934482	1	0.256743	1	1	1	0.990303	1	0.936598	0.488675	0.982225	0.713467	0.847043	1	0.333671	0.935221	1	0.198841	1	1	1	1	1	0.994057	1	0.642431	1	1.0002	1	1	0.98557	0.995442	0.94426	0.736602
Node 18	YGR011W
Node 19	YDL210W	1	1.0001	0.999306	1	1	1	1	1	1	0.855683	0.0805396	0.613668	1	0.780698	0.743999	1	1	1	0.00257885	1	0.99514	1	0.748165	0.699068	0.991073	0.46469	0.920353	1	0.577663	0.96707	1	1	1	1	1	1	1	0.997024	1	0.801527	0.728923	1.0001	1	1	0.992759	0.997719	0.971732	0.858262
Node 2	YLR302C	0.822605	1.00219	0.98482	0.923734	0.446556	0.897663	0.588085	0.0299904	0.0848168	0.365547	0.258976	0.810654	0.709289	0.452954	0.0535098	0.919733	0.601475	1	1	0.62392	0.89826	1	0.833564	0.161965	0.983789	0.164961	0.467475	0.328775	0.016091	0.96572	1	0.233405	0.670784	1	1	0.912348	0.392016	0.936478	1	0.738939	0.426288	1.00219	1	0.267222	0.852109	0.950946	0.872844	0.919878
Node 2_fuzzy0.06	YJR109C	0.627365	1.00319	0.977986	0.960534	0.229681	0.936965	0.816295	0.0042842	0.307586	0.688511	0.482162	0.525381	0.744594	0.59655	0.252238	0.974546	0.837301	1	1	0.705547	0.855435	1	0.728819	0.110543	0.967134	0.68514	0.26425	0.671008	0.236776	0.912959	1	0.0663576	0.801484	1	0.78777	0.862488	0.302437	0.908911	1	0.367964	0.329114	1.00319	1	0.179329	0.792231	0.929417	0.771411	0.926687
Node 20	YCL075W	0.574588	1.0001	0.999306	1	1	0.81214	1	1	0	0.855683	1	1	1	0.780698	0.743999	1	1	1	1	0.375322	0.99514	1	0.748165	0.699068	0.991073	0.46469	0.920353	1	0.577663	0.96707	1	1	1	1	1	1	1	0.997024	1	0.801527	1	1.0001	1	1	0.992759	0.997719	0.971732	0.858262
Node 21	YKR032W	0.819049	1.0002	0.998612	1	1	0.659557	0.47374	1	0.144139	0.732182	1	1	0.581806	0.951924	0.553516	1	1	1	1	0.609801	0.990303	1	0.559732	0.909461	0.982225	0.713467	0.847043	1	0.333671	0.935221	1	1	1	1	1	1	1	0.994057	1	0.642431	0.926537	1.0002	1	1	0.98557	0.995442	0.94426	0.979922
Node 22	YBR064W	1	1.0001	0.999306	1	0.329994	1	1	0.506447	1	0.855683	1	0.613668	1	0.780698	1	1	1	1	1	1	0.99514	1	0.748165	0.699068	0.991073	1	0.920353	0.172982	1	0.96707	1	1	1	1	1	1	1	0.997024	1	0.801527	0.728923	1.0001	1	1	0.992759	0.997719	0.971732	0.858262
Node 23	YDR220C
Node 24	YJL012C
Node 25	YBR213W	0.574588	1.0001	0.999306	0.34636	1	1	0.274549	1	1	0.855683	1	0.613668	1	0.780698	0.743999	1	0.137869	1	1	0.375322	0.99514	1	0.748165	0.699068	0.991073	0.46469	0.920353	1	0.577663	0.96707	1	1	1	1	1	1	0.22932	0.997024	1	0.801527	0.728923	1.0001	1	1	0.992759	0.997719	0.971732	0.858262
Node 26	YPL276W	0.574588	1.0001	0.999306	0.34636	1	0.81214	1	0.506447	1	0.855683	1	0.613668	0.353303	1	1	1	0.137869	1	1	0.375322	0.99514	1	0.748165	0.699068	0.991073	1	0.920353	0.172982	0.577663	0.96707	1	0.445943	1	1	1	1	0.22932	0.997024	1	0.801527	0.728923	1.0001	1	1	0.992759	0.997719	0.971732	0.858262
Node 27	YCR010C	1	1.0001	0.999306	1	1	0.81214	1	1	1	0.855683	1	0.613668	1	0.780698	1	1	1	1	1	1	0.99514	1	0.748165	0.699068	0.991073	1	0.920353	1	1	0.96707	1	0.445943	1	1	1	1	1	0.997024	1	1	0.728923	1.0001	1	1	0.992759	0.997719	0.971732	0.858262
Node 28	YAL058C-A	0.923042	1.0003	0.997918	0.720779	1	0.535628	1	0.509671	1	0.626495	1	0.667581	0.729584	0.876843	0.836973	1	1	1	1	0.316842	0.985489	0.0120981	0.418744	0.782849	0.973455	0.846643	0.981998	0.434388	0.615569	0.904418	1	1	1	1	1	1	0.542296	0.991099	1	0.897491	0.980096	1.0003	1	0.131282	0.978433	0.993171	0.917562	0.632177
Node 29	YIR017C
Node 3	YAR009C	0.637819	1.0005	0.996533	0.564602	0.204905	0.761962	0.799147	0.970743	1	0.845623	0.342906	0.923094	0.577955	0.926231	0.620154	0.436032	1	1	1	0.0693775	0.97593	1	0.983964	0.997538	0.956147	0.765314	0.94612	0.613201	0.643321	0.845814	1	0.127134	1	1	1	1	0.323624	0.985207	1	0.943292	0.588412	1.0005	1	0.209101	0.96431	0.988643	0.866402	0.465617
Node 30	YKL163W	0.431782	1.0004	0.997225	0.817519	0.798541	0.434975	0.303735	0.940698	1	0.536054	0.0348358	0.498931	0.825151	0.371416	0.728135	1	0.447604	1	1	0.481779	0.980698	1	0.313258	0.915635	0.964763	0.632788	0.717456	0.532258	0.436974	0.874627	1	1	1	1	1	1	1	0.988149	1	0.412676	0.936559	1.0004	1	1	0.971346	0.990905	0.891617	0.542547
Node 31	YDR364C	0.217778	1.00139	0.990317	0.348484	0.513786	0.494491	0.563304	0.623599	0.841388	0.112648	0.691597	0.146662	0.0791195	0.0311647	0.723812	1	0.30242	1	1	0.108855	0.934025	0.229686	0.736234	0.778294	0.881952	0.949371	0.905282	0.446242	0.224728	0.625572	1	0.248507	1	1	0.492135	0.050775	0.655362	0.959112	1	0.703505	0.942681	1.00139	1	0.132695	0.903207	0.968511	0.669169	0.681818
Node 32	YGL087C	0.364398	1.00169	0.988253	0.368919	0.510559	0.798334	0.885311	0.0791474	0.296053	0.0705235	0.760366	0.302929	0.392318	0.0856798	0.15028	0.857528	0.422129	1	1	0.28303	0.920453	0.303791	0.566856	0.199372	0.858509	0.217862	0.602654	0.584079	0.0311433	0.565698	1	0.512117	0.0481284	1	0.190248	0.543983	0.174971	0.950563	1	0.555241	0.697594	1.00169	1	0.181642	0.883701	0.961888	0.918038	0.787175
Node 33	YLR102C	1	1.0001	0.999306	1	1	0.81214	0.274549	0.506447	0	0.855683	1	1	1	1	0.743999	1	0.137869	1	1	0.375322	0.99514	1	0.748165	0.699068	0.991073	0.46469	0.920353	0.172982	0.577663	0.96707	1	0.445943	1	1	1	0.104642	0.22932	0.997024	1	0.801527	0.728923	1.0001	1	1	0.992759	0.997719	0.971732	0.858262
Node 34	YDL091C	0.819049	1.0002	0.998612	0.572777	0.551114	0.659557	0.47374	0.256464	1	0.732182	0.1546	1	1	0.951924	0.553516	1	0.0189962	1	1	0.609801	0.990303	1	0.936598	0.488675	0.982225	0.713467	0.847043	1	0.333671	0.935221	1	0.198841	1	1	1	1	0.406069	0.994057	1	0.642431	0.926537	1.0002	1	1	0.98557	0.995442	0.94426	0.736602
Node 35	YGR294W	0.930815	1.00671	0.954385	0.56709	0.557394	0.623994	0.85851	0.7999	0.0642017	0.0266259	0.456232	0.276378	0.23241	0.604347	0.654525	0.59779	0.206029	1	1	0.460285	0.720724	0.989067	0.981586	0.542827	0.547296	0.279994	0.554625	0.105468	0.0442886	0.930745	1	0.258285	0.848836	0.312309	0.0378965	0.560774	0.961978	0.818469	1	0.653766	0.650443	1.00671	1.00002	0.598619	0.61355	0.857679	0.95939	0.0302342
Node 36	YDR285W
Node 37	YER041W	0.330128	1.0002	0.998612	1	0.551114	0.659557	1	0.75643	0.144139	0.732182	1	0.850771	0.581806	0.609473	0.553516	1	1	1	1	1	0.990303	1	0.936598	0.909461	0.982225	0.215912	0.847043	1	0.821656	0.935221	1	0.693046	1	1	1	1	1	0.994057	1	0.642431	0.531309	1.0002	1	1	0.98557	0.995442	0.94426	0.736602
Node 38	YDR242W	1	1.0001	0.999306	1	1	1	1	0.506447	1	0.855683	1	0.613668	1	0.780698	0.743999	1	1	1	1	0.375322	0.99514	1	0.748165	0.699068	0.991073	0.46469	0.920353	1	0.577663	0.96707	1	1	1	1	1	1	1	0.997024	1	1	0.728923	1.0001	1	1	0.992759	0.997719	0.971732	0.858262
Node 39	YMR088C	0.327936	1.00199	0.986192	0.226692	0.841317	0.465802	0.0700721	0.14414	0.509655	0.675273	0.214796	0.465682	0.128136	0.0466644	0.207187	1	0.948696	1	1	0.084974	0.907073	0.739405	0.780164	0.412667	0.835682	0.461179	0.789945	0.464026	0.0332008	0.860592	1	0.394237	1	1	1	0.634379	0.300789	0.942088	1	0.636357	0.0150591	1.00199	1	0.609002	0.86461	0.955308	0.891568	0.857285
Node 4	YNL231C
Node 40	YBL111C	0.574588	1.0001	0.999306	0.34636	0.329994	0.81214	1	0.506447	1	0.855683	1	0.613668	0.353303	0.780698	0.743999	1	1	1	1	0.375322	0.99514	1	0.748165	0.699068	0.991073	0.46469	0.920353	0.172982	1	0.96707	1	1	1	1	1	1	1	0.997024	1	0.801527	1	1.0001	1	1	0.992759	0.997719	0.971732	0.858262
Node 41	YMR201C	1	1.0002	0.998612	1	0.551114	0.964724	1	0.75643	0.144139	0.732182	1	0.376565	0.1248	0.951924	0.553516	1	1	1	1	0.609801	0.990303	1	0.559732	0.488675	0.982225	0.713467	0.847043	1	0.333671	0.935221	1	1	1	1	1	0.198343	1	0.994057	1	0.642431	0.531309	1.0002	1	1	0.98557	0.995442	0.94426	0.736602
Node 42	YLR121C	0.819049	1.0002	0.998612	0.572777	0.551114	0.659557	1	0.256464	1	0.732182	0.1546	0.850771	0.581806	0.951924	0.553516	0.204725	1	1	1	0.609801	0.990303	1	0.559732	0.488675	0.982225	0.713467	0.847043	0.316055	0.333671	0.935221	1	1	1	1	1	0.198343	1	0.994057	1	0.960624	0.531309	1.0002	1	1	0.98557	0.995442	0.94426	0.736602
Node 43	YJR153W	0.611063	1.0003	0.997918	1	0.254796	0.907414	0.618253	0.509671	0.322996	0.943556	0.222702	0.942366	0.729584	0.475788	0.411787	0.0325731	0.359236	1	1	0.756281	0.985489	1	0.418744	0.782849	0.973455	0.100309	0.779565	1	0.615569	0.904418	1	1	1	1	1	0.282247	1	0.991099	1	0.5149	0.387255	1.0003	1	1	0.978433	0.993171	0.917562	0.632177
Node 44	YGL146C	0.9811	1.00359	0.975264	0.488453	0.0253905	0.638527	0.689933	0.464724	0.517573	0.0910323	0.0654477	0.89007	0.659356	0.748298	0.945116	0.913438	0.75091	1	1	0.0859645	0.838871	0.91131	0.280757	0.906631	0.723705	0.982839	0.444796	0.276202	0.0245888	0.885924	0.0420396	0.312247	0.837872	1	0.240519	0.903019	0.750935	0.898105	1	0.915313	0.619549	1.00359	1.00001	0.496144	0.769459	0.920937	0.355533	0.407769
Node 45	YPL072W
Node 46	YDR534C	0.574588	1.0001	0.999306	1	1	1	0.274549	1	1	0.855683	1	0.613668	0.353303	0.780698	0.743999	1	1	1	1	0.375322	0.99514	1	0.748165	1	0.991073	1	0.920353	1	1	0.96707	1	1	1	1	1	1	1	0.997024	1	0.801527	0.728923	1.0001	1	1	0.992759	0.997719	0.971732	0.858262
Node 47	YCR106W
Node 48	YDR281C	0.574588	1.0001	0.999306	0.34636	1	1	1	1	1	0.855683	1	1	0.353303	0.780698	0.743999	1	1	1	1	1	0.99514	1	0.748165	1	0.991073	0.46469	0.920353	1	1	0.96707	1	0.445943	1	1	1	1	1	0.997024	1	0.801527	0.728923	1.0001	1	1	0.992759	0.997719	0.971732	1
Node 49	YDR217C	0.330128	1.0002	0.998612	1	0.551114	0.964724	1	1	1	0.732182	0.1546	1	0.581806	0.609473	0.934482	0.204725	0.256743	1	1	1	0.990303	1	0.559732	0.909461	0.982225	1	0.847043	1	0.333671	0.935221	1	0.693046	1	1	1	1	1	0.994057	1	0.960624	0.926537	1.0002	1	1	0.98557	0.995442	0.94426	0.736602
Node 5	YGR284C	0.611063	1.0003	0.997918	0.720779	1	0.907414	0.618253	0.509671	0.322996	0.626495	1	0.667581	1	0.989464	0.411787	1	0.359236	1	1	0.756281	0.985489	1	0.418744	0.341587	0.973455	1	0.779565	0.434388	0.924699	0.904418	1	0.829957	1	1	0.135069	1	0.542296	0.991099	1	0.5149	0.387255	1.0003	1	1	0.978433	0.993171	0.917562	0.632177
Node 50	YBR092C
Node 51	YPL011C	0.574588	1.0001	0.999306	1	1	1	0.274549	1	1	0.855683	1	1	1	0.780698	0.743999	0.108213	1	1	1	1	0.99514	1	0.748165	1	0.991073	0.46469	0.920353	1	0.577663	0.96707	1	0.445943	1	1	1	1	0.22932	0.997024	1	0.801527	0.728923	1.0001	1	1	0.992759	0.997719	0.971732	0.858262
Node 52	YOR371C	0.574588	1.0001	0.999306	1	1	0.81214	1	1	1	1	1	1	1	0.780698	1	1	0.137869	1	1	1	0.99514	1	0.748165	0.699068	0.991073	1	1	1	1	0.96707	1	0.445943	1	1	1	1	1	0.997024	1	0.801527	0.728923	1.0001	1	1	0.992759	0.997719	0.971732	0.858262
Node 53	YER064C
Node 54	YGR055W
Node 55	YDL095W	0.967274	1.0004	0.997225	1	0.40147	0.434975	0.723092	0.940698	0.0207624	0.536054	1	0.141766	0.129614	0.964781	0.945811	1	1	1	1	0.481779	0.980698	0.235655	0.735202	0.915635	0.964763	0.632788	0.96589	0.532258	0.436974	0.874627	1	0.905809	1	1	0.0125254	0.357376	1	0.988149	1	0.821572	0.702276	1.0004	1	1	0.971346	0.990905	0.891617	0.542547
Node 56	YDL095W	0.967274	1.0004	0.997225	1	0.40147	0.434975	0.723092	0.940698	0.0207624	0.536054	1	0.141766	0.129614	0.964781	0.945811	1	1	1	1	0.481779	0.980698	0.235655	0.735202	0.915635	0.964763	0.632788	0.96589	0.532258	0.436974	0.874627	1	0.905809	1	1	0.0125254	0.357376	1	0.988149	1	0.821572	0.702276	1.0004	1	1	0.971346	0.990905	0.891617	0.542547
Node 57	YDR429C	0.923042	1.0003	0.997918	0.276773	1	0.535628	0.184715	0.12986	0.322996	0.943556	1	0.942366	0.729584	0.475788	0.836973	1	0.359236	1	1	0.756281	0.985489	1	0.841708	0.341587	0.973455	0.447117	0.779565	0.434388	1	0.904418	1	1	1	1	1	1	0.542296	0.991099	1	0.897491	0.819417	1.0003	1	0.131282	0.978433	0.993171	0.917562	0.632177
Node 58	YJL034W	0.790345	1.0004	0.997225	0.43056	1	0.837587	0.303735	0.697146	0.489441	0.897816	1	1	0.825151	0.964781	0.306338	0.0604993	1	1	1	0.847781	0.980698	1	0.948215	0.915635	0.964763	0.261446	0.717456	0.532258	0.794165	0.874627	1	0.236045	1	1	1	0.357376	0.647288	0.988149	1	0.821572	0.702276	1.0004	1	1	0.971346	0.990905	0.891617	0.542547
Node 59	YDR400W	0.108952	1.0004	0.997225	0.43056	1	0.837587	0.0656953	0.0657483	1	0.536054	1	0.977745	1	1	0.728135	0.367568	1	1	1	0.847781	0.980698	1	0.948215	0.238762	0.964763	0.261446	0.717456	0.532258	0.436974	0.993792	1	0.0395182	0.18276	1	1	1	0.227321	0.988149	1	0.412676	0.702276	1.0004	1	1	0.971346	0.990905	0.891617	0.542547
Node 6	YKL213C	0.365809	1.00069	0.995149	0.760031	0.730514	0.232921	1	0.941686	0.251466	0.73245	0.444541	0.449947	0.475308	0.524285	0.7439	1	0.249688	1	1	0.962928	0.966461	0.375223	0.131123	0.97086	0.939144	0.172714	0.559246	0.735505	0.880578	0.790997	1	0.983999	1	1	1	0.538819	0.201871	0.97935	1	0.212425	0.908414	1.00069	1	1	0.950389	0.984135	0.818085	0.342918
Node 60	YHR142W	1	1.0002	0.998612	1	0.108874	0.659557	1	0.256464	0.144139	0.979185	1	0.850771	0.581806	0.609473	0.553516	1	1	1	1	0.609801	0.990303	1	0.936598	0.488675	0.982225	0.215912	0.847043	1	0.821656	0.935221	1	0.693046	1	1	1	1	1	0.994057	1	0.642431	0.531309	1.0002	1	0.089553	0.98557	0.995442	0.94426	0.979922
Node 61	YKR042W	0.330128	1.0002	0.998612	0.572777	1	0.659557	0.0753572	1	0.144139	0.732182	1	0.376565	1	0.609473	0.934482	1	1	1	1	0.609801	0.990303	1	0.936598	0.488675	0.982225	1	0.847043	1	0.333671	0.935221	1	0.693046	0.0959775	1	1	1	1	0.994057	1	0.642431	0.531309	1.0002	1	1	0.98557	0.995442	0.94426	0.736602
Node 62	YLR263W	0.611063	1.0003	0.997918	1	0.254796	0.993379	0.618253	0.509671	1	0.943556	1	0.942366	0.729584	0.876843	0.983237	1	0.359236	1	1	0.756281	0.985489	1	0.418744	0.782849	0.973455	1	0.981998	1	0.615569	0.904418	1	0.0886499	1	1	1	1	1	0.991099	1	0.5149	0.819417	1.0003	1	1	0.978433	0.993171	0.917562	0.632177
Node 63	YGL157W	0.035947	1.0006	0.99584	1	0.642269	0.915526	0.523291	0.355871	0.15225	0.957292	0.395854	0.57265	0.687148	0.226317	0.519721	0.497091	1	1	1	0.726446	0.971184	1	0.529556	0.116637	0.947608	0.280031	0.607674	0.0684805	0.49807	0.817948	1	0.831447	1	1	0.00187943	1	0.416408	0.982274	1	0.659115	0.149916	1.0006	1	1	0.957325	0.986387	0.841898	0.795758
Node 64	YJL052W
Node 65	YLR045C	0.967274	1.0004	0.997225	0.817519	0.798541	0.977242	1	0.940698	0.489441	0.536054	1	0.836231	0.825151	0.788904	0.728135	1	0.447604	1	1	0.847781	0.980698	1	0.948215	0.915635	0.964763	0.632788	0.717456	0.532258	0.794165	0.874627	1	0.602401	0.18276	1	1	1	0.227321	0.988149	1	0.821572	0.702276	1.0004	1	1	0.971346	0.990905	0.891617	0.901067
Node 66	YFR025C	0.574588	1.0001	0.999306	1	1	1	0.274549	0.506447	1	0.855683	1	1	0.353303	0.780698	0.743999	1	1	1	1	1	0.99514	1	0.748165	0.699068	0.991073	0.46469	0.920353	1	1	0.96707	1	1	1	1	1	1	1	0.997024	1	0.801527	0.728923	1.0001	1	1	0.992759	0.997719	0.971732	0.858262
Node 67	YKR003W	0.784594	1.00269	0.981398	0.467815	0.970317	0.88173	0.989478	0.94689	0.97445	0.651151	0.896708	0.0562701	0.498318	0.439448	0.274472	0.571486	0.312492	1	1	0.289672	0.876591	0.25466	0.461892	0.99493	0.784727	0.505329	0.106038	0.320055	0.366052	0.404434	1	0.986178	1	1	0.729518	0.790241	0.265811	0.922595	1	0.849696	0.703826	1.00269	1	0.718655	0.821632	0.940123	0.460588	0.0877835
Node 68	YKR003W	0.140617	1.00209	0.985506	0.902097	0.950919	0.917404	0.723693	0.997006	0.243393	0.171815	0.00507742	0.736089	0.476315	0.498137	0.541084	0.90997	0.568591	1	1	0.560768	0.902656	1	0.186294	0.991086	0.828207	0.114999	0.768382	0.14099	0.00636872	0.969675	1	0.644949	0.653713	1	0.638203	0.66122	0.187417	0.939279	1	0.376785	0.288275	1.00209	1	0.626955	0.858337	0.953125	0.547282	0.180062
Node 69	YOR143C	0.574588	1.0001	0.999306	0.34636	0.329994	0.81214	0.274549	0.506447	1	0.855683	1	0.613668	0.353303	0.780698	0.743999	1	1	1	1	1	0.99514	1	0.748165	0.699068	0.991073	1	0.920353	1	0.577663	0.96707	1	0.445943	0.0491966	1	1	1	1	0.997024	1	0.801527	1	1.0001	1	1	0.992759	0.997719	0.971732	0.858262
Node 7	YLR201C	0.643351	1.01058	0.929316	0.646524	0.934268	0.211514	0.765358	0.552957	0.810811	0.0922229	0.751677	0.341077	0.0175421	0.796908	0.226034	0.712488	0.483778	1	1	0.0764424	0.597965	0.685421	0.912351	0.497225	0.388122	0.367809	0.0712903	0.266484	0.667055	0.54365	1	0.297934	0.895839	0.444501	0.737133	0.418944	0.452729	0.730131	1	0.476392	0.751468	1.01058	1.00005	0.53005	0.4644	0.785797	0.198115	0.684668
Node 70	YOL018C	1	1.0001	0.999306	0.34636	0.329994	0.81214	0.274549	0.506447	0	0.855683	1	1	1	1	0.743999	1	0.137869	1	1	1	0.99514	1	0.748165	0.699068	0.991073	1	0.920353	1	0.577663	0.96707	1	1	1	1	1	1	1	0.997024	1	0.801527	0.728923	1.0001	1	1	0.992759	0.997719	0.971732	0.858262
Node 71	YHR007C	0.611063	1.0003	0.997918	0.720779	0.699273	0.907414	0.184715	0.87981	1	0.626495	1	1	1	0.876843	0.411787	1	1	1	1	1	0.985489	0.182531	0.984043	0.972766	0.973455	0.846643	0.779565	0.434388	1	0.996827	1	0.829957	1	1	1	1	1	0.991099	1	0.5149	0.980096	1.0003	1	1	0.978433	0.993171	0.997656	0.945452
Node 72	YHR108W	0.696548	1.01584	0.896559	0.599406	0.563057	0.995553	0.832184	0.00134944	0.98975	0.248919	0.49139	0.0981971	0.106979	0.237279	0.747627	0.526325	0.881955	1	1	0.880565	0.464893	0.213697	0.243181	0.0125127	0.244205	0.498718	0.929366	0.290341	0.541637	0.745144	1	0.0537794	0.360541	0.58342	0.0652816	0.36684	0.0220945	0.625939	0.00139853	0.133426	0.00835767	1.01584	1.00012	0.0545247	0.319025	0.698333	0.177714	0.0336178
Node 73	YLR400W	0.336439	1.03805	0.773554	0.136356	0.826795	0.972849	0.986461	0.0293902	0.820292	0.452885	0.547501	0.556561	0.0448603	0.00100077	0.254736	0.284926	0.704579	1	0.615033	0.698589	0.741556	0.0309597	0.01706	0.0533169	0.159577	0.980361	0.254803	0.880612	0.675681	0.237327	1	0.680568	0.52153	1	0.092117	0.661433	0.0776261	0.705776	1	0.155805	0.862752	1.03805	1.00068	0.0717432	0.0681111	0.799942	0.42069	0.0135963
Node 74	YDR397C	0.574588	1.0001	0.999306	1	1	0.81214	1	1	1	0.855683	1	1	0.353303	0.780698	0.743999	1	1	1	1	0.375322	0.99514	1	0.748165	0.699068	0.991073	1	0.920353	1	1	0.96707	1	0.445943	1	1	0.0472129	1	0.22932	0.997024	1	0.801527	1	1.0001	1	1	0.992759	0.997719	0.971732	0.858262
Node 75	YOR236W	0.819049	1.0002	0.998612	1	1	0.659557	0.0753572	0.75643	0.144139	0.732182	1	1	1	1	0.553516	1	0.256743	1	1	0.609801	0.990303	1	0.559732	0.909461	0.982225	0.713467	0.847043	1	1	0.935221	1	0.693046	1	1	1	1	0.406069	0.994057	1	1	0.926537	1.0002	1	1	0.98557	0.995442	0.94426	0.736602
Node 76	YNL210W	0.790345	1.0004	0.997225	0.817519	1	0.837587	1	1	0.489441	0.989295	0.285323	0.836231	0.825151	0.788904	0.945811	1	1	1	1	0.847781	0.980698	1	0.735202	0.99181	0.964763	0.632788	0.717456	1	1	0.874627	1	0.602401	1	1	1	0.357376	1	0.988149	1	0.821572	0.282247	1.0004	1	1	0.971346	0.990905	0.891617	0.542547
Node 77	YHR179W	0.574588	1.0001	0.999306	1	0.329994	0.81214	1	0.506447	1	0.855683	1	1	0.353303	0.780698	0.743999	1	1	1	1	1	0.99514	1	0.748165	0.699068	0.991073	0.46469	0.920353	1	0.577663	0.96707	1	0.445943	1	1	1	1	0.22932	0.997024	1	0.801527	0.728923	1.0001	1	1	0.992759	0.997719	0.971732	0.858262
Node 78	YDR086C
Node 79	YDL236W	1	1.0003	0.997918	0.276773	0.699273	0.535628	0.618253	0.87981	1	0.626495	1	0.667581	0.286248	0.475788	0.836973	1	0.0517571	1	1	0.316842	0.985489	1	0.841708	0.972766	0.973455	0.846643	0.981998	1	0.192721	0.904418	1	0.829957	1	1	1	1	1	0.991099	1	0.992191	0.980096	1.0003	1	1	0.978433	0.993171	0.917562	0.945452
Node 8	YML116W	0.291851	1.00429	0.970515	0.199939	0.224095	0.426102	0.275379	0.53396	0.158758	0.398174	0.871688	0.367694	0.085867	0.929194	0.706245	0.319506	0.129053	1	1	0.144629	0.810637	0.778681	0.603845	0.450439	0.679509	0.557155	0.132517	0.472375	0.662909	0.236245	1	0.695075	0.632111	1	0.331622	0.672182	0.802174	0.879493	1	0.930722	0.904276	1.00429	1.00001	0.592743	0.731151	0.906274	0.655773	0.59021
Node 80	YJR139C	0.923948	1.00099	0.993076	0.910438	0.892101	0.899629	0.283964	0.059278	0.565636	0.955968	0.189828	0.055171	0.745598	0.619021	0.977888	1	0.773316	1	1	0.554157	0.952427	1	0.771659	0.147732	0.914197	0.998075	0.994319	0.242526	0.576231	0.715341	1	0.895976	0.39632	1	0.3836	0.669066	0.706276	0.970626	1	0.68244	0.724794	1.00099	1	0.374553	0.929878	0.97741	0.750599	0.21671
Node 81	YLR180W	0.659625	1.00069	0.995149	0.459361	0.168129	0.872274	0.614195	0.237195	0.251466	0.73245	0.0142386	0.177113	1	0.817291	0.923843	0.551545	0.249688	1	1	0.525407	0.966461	1	0.75264	0.327362	0.939144	0.711605	0.898244	0.735505	0.372202	0.790997	1	0.983999	1	1	0.287268	0.538819	0.83862	0.97935	1	0.854654	0.393895	1.00069	1	0.279962	0.950389	0.984135	0.818085	0.739612
Node 82	YBL002W	0.49173	1.0006	0.99584	0.922073	1	0.68518	0.854318	0.896621	1	0.392437	1	0.0533573	0.687148	0.876058	0.821018	0.497091	0.58948	1	1	0.404605	0.971184	1	0.827711	0.988927	0.947608	0.9765	0.607674	0.680143	0.49807	0.817948	1	0.831447	1	1	1	0.484884	0.416408	0.982274	1	0.903049	0.484656	1.0006	1	1	0.957325	0.986387	0.841898	0.399589
Node 83	YLR049C	0.574588	1.0001	0.999306	1	1	0.81214	1	0.506447	1	0.855683	0.0805396	0.613668	1	0.780698	0.743999	1	0.137869	1	1	0.375322	0.99514	1	1	0.699068	0.991073	0.46469	0.920353	1	0.577663	0.96707	1	0.445943	1	1	1	1	0.22932	0.997024	1	0.801527	0.728923	1.0001	1	1	0.992759	0.997719	0.971732	0.858262
Node 84	YLR049C	0.574588	1.0001	0.999306	1	1	0.81214	1	0.506447	1	0.855683	1	0.613668	0.353303	0.780698	1	1	1	1	1	1	0.99514	1	0.748165	0.699068	0.991073	1	0.920353	1	0.577663	0.96707	1	0.445943	1	1	1	1	1	0.997024	1	1	0.728923	1.0001	1	1	0.992759	0.997719	0.971732	0.858262
Node 85	YPL158C	1	1.0001	0.999306	0.34636	1	1	1	0.506447	0	0.855683	1	0.613668	1	0.780698	1	0.108213	1	1	1	1	0.99514	1	0.748165	0.699068	0.991073	1	0.920353	1	0.577663	0.96707	1	0.445943	1	1	0.0472129	1	0.22932	0.997024	1	0.801527	0.728923	1.0001	1	1	0.992759	0.997719	0.971732	0.858262
Node 86	YOR263C	0.408294	1.00139	0.990317	0.565981	0.971075	0.894999	0.929708	0.623599	0.115519	0.671265	0.0972141	0.528378	0.0791195	0.82542	0.723812	1	0.30242	1	1	0.987079	0.934025	1	0.885224	0.581164	0.881952	0.949371	0.905282	1	0.805594	0.924192	1	0.65142	1	1	0.492135	0.174433	0.200392	0.959112	1	0.45369	0.448372	1.00139	1	0.481667	0.903207	0.968511	0.669169	0.681818
Node 87	YER019W	0.923042	1.0003	0.997918	1	0.0359133	0.907414	1	1	1	0.626495	1	0.667581	0.286248	0.876843	0.983237	1	0.0517571	1	1	1	0.985489	0.182531	0.418744	1	0.973455	0.846643	0.981998	1	0.192721	0.904418	1	1	1	1	1	1	0.542296	0.991099	1	0.5149	0.387255	1.0003	1	1	0.978433	0.993171	0.917562	0.632177
Node 88	YHR215W	0.819049	1.0002	0.998612	0.572777	1	0.659557	1	1	0.144139	0.732182	1	0.376565	0.581806	0.951924	0.553516	1	0.256743	1	1	0.609801	0.990303	1	0.936598	0.909461	0.982225	0.215912	0.847043	0.316055	0.333671	0.935221	1	1	1	1	1	0.198343	0.406069	0.994057	1	0.642431	0.926537	1.0002	1	1	0.98557	0.995442	0.94426	0.736602
Node 89	YHR085W	0.0625843	1.0005	0.996533	0.229498	0.532514	0.951024	0.799147	0.820517	1	0.845623	1	0.0869753	0.05584	0.697353	0.620154	0.0937107	1	1	1	0.619166	0.97593	1	0.234338	0.835737	0.956147	0.956081	0.660291	1	0.299409	0.845814	1	0.399411	1	1	0.21484	0.424648	1	0.985207	1	0.740426	0.205706	1.0005	1	1	0.96431	0.988643	0.866402	0.465617
Node 9	YGL091C	0.239356	1.00109	0.992385	0.792897	0.280593	0.10125	0.356091	0.894942	0.959615	0.795942	0.220304	0.570454	0.806327	0.553491	0.436683	0.337618	1	1	1	0.957074	0.947794	1	0.708307	0.978062	0.906028	0.640839	0.783408	0.293518	0.245869	0.691762	1	0.931408	0.0990348	1	1	0.70373	0.943126	0.967735	1	0.0876023	0.848827	1.00109	1	0.0876618	0.923138	0.975178	0.729359	0.803541
Node 90	YGL235W	0.574588	1.0001	0.999306	1	1	0.81214	1	0.506447	1	1	1	1	0.353303	0.780698	0.743999	1	1	1	1	1	0.99514	1	0.748165	0.699068	0.991073	1	0.920353	1	1	0.96707	1	0.445943	1	1	1	0.104642	1	0.997024	1	0.801527	0.728923	1.0001	1	1	0.992759	0.997719	0.971732	0.858262
[truncated: 38 more columns]
