# Supplementary material for: Conservation and Evolution of Cis-Regulatory Systems in Ascomycete Fungi
Source: PLoS Biol. 2004 Nov 9;2(12):e398. doi: 10.1371/journal.pbio.0020398 (PMC526180; doi:10.1371/journal.pbio.0020398)
Supplement: Dataset S35 — (383 KB XLS). [file pbio.0020398.sd035.xls]

## Sheet: Sheet1
UID	ABF1	ACE2	ADR1	AFT1	ARO80	ASH1	AZF1	BAS1	CAD1/YAP2	CAT8	CBF1	CHA4	CRZ1	CUP2	DAL80	ECM22	FKH1	FLO8	FZF1	GAL4	GAT1	GATGAG1	GATGAG2	GCN4	GCR1	GLN3	GZF3	HAC1	HAP1	HAP4	HCM1	HSF1	IME1	INO2/4	LEU3	LYS14	MAC1	MAL63	MATALPHA	MCB	MCM1	MCM1-2	MCM1-3	MET30/31	MIG1	MOT3	MSN2/4	MTsite1	MTsite2
Cluster_ABF1
Cluster_ACE2	0.214978	1.0005	0.992092	0.884797	0.874166	0.164333	1	0.864928	0.670149	0.201313	1	0.297771	0.884513	0.468095	0.962324	0.451189	1	1	1	0.871999	0.912387	0.263034	0.343252	0.537796	0.629428	0.826938	0.928845	1	0.0947979	0.558685	1	0.492376	1	1	1	1	0.714652	0.965814	1	0.139821	0.135821	1.0005	1	1	0.712465	0.977415	0.964489	0.239158	1
Cluster_ADR1	0.741266	1.00069	0.988945	0.530415	0.50275	0.274539	0.917336	0.673203	1	0.74515	0.479286	0.425882	0.281665	0.0512288	0.478439	0.194455	1	1	1	0.764015	0.879519	0.347759	0.756306	0.861808	0.522992	0.599482	0.898846	1	0.979487	0.109484	1	0.499737	1	1	1	0.0387512	0.82724	0.952465	1	0.641341	0.534206	1.00069	1	1	0.922538	0.968521	0.417671	0.970273	0.955655
Cluster_ARG80	0.70308	1.0005	0.992092	0.305055	0.0993164	0.628593	0.214746	0.0546267	0.150328	0.201313	1	0.544417	0.110674	0.237222	0.869967	0.451189	0.584718	1	1	0.0242586	0.912387	1	0.804456	0.0346534	0.629428	1	0.257977	1	0.0259649	0.558685	1	0.769293	1	1	1	1	0.714652	0.965814	1	0.338	0.320356	1.0005	1	1	0.958206	0.977415	0.600136	0.485025	0.11988
Cluster_ARG81	0.530115	1.00055	0.991304	0.363688	0.897729	0.898478	0.0894732	0.0256778	0.72239	0.344964	1	0.187775	0.0448639	0.800663	0.340285	1	0.619665	1	1	0.335441	0.904057	1	0.462449	0.0030719	0.600945	0.866485	0.209925	1	0.0500431	0.175899	1	0.563274	1	1	0.169724	0.0198688	0.378249	0.96246	1	0.71222	0.853422	1.00055	1	1	0.688709	0.975184	0.550692	0.0525318	0.380819
Cluster_Arginine	0.123418	1.00055	0.991304	0.907193	0.340027	0.291972	0.55646	0.000743933	0.197808	0.344964	1	0.389434	0.660232	0.800663	0.574814	1	0.619665	1	1	0.335441	0.904057	0.285193	0.243922	0.0030719	0.914253	0.866485	0.0461306	1	0.574292	0.507151	1	0.303313	1	1	1	1	0.131088	0.96246	1	0.483013	0.436318	1.00055	1	1	0.688709	0.975184	0.550692	0.396347	0.913525
Cluster_ARO80	0	1.0004	0	0.0511709	1.49686e-06	0	0.000388428	0.762996	1	0	1	0.000363142	0.0509994	0	0	1	1	1	1	0.454246	0	0.0223883	0.127012	0.104619	0	0.00866633	0	0.149088	0.0252681	0	1	0.647739	0.011051	1	1	0.0683878	0.241274	0	1	0	0.00264889	1.0004	1	1	0	0	0	0.402649	0.0557552
Cluster_ARO80	0	1.0004	0	0.0511709	1.49686e-06	0	0.000388428	0.762996	1	0	1	0.000363142	0.0509994	0	0	1	1	1	1	0.454246	0	0.0223883	0.127012	0.104619	0	0.00866633	0	0.149088	0.0252681	0	1	0.647739	0.011051	1	1	0.0683878	0.241274	0	1	0	0.00264889	1.0004	1	1	0	0	0	0.402649	0.0557552
Cluster_ASH1	0.371107	1.0006	0.990517	0.421428	0.916881	0.941212	0.881958	0.76928	0.249008	0.0268451	1	0.479949	0.708134	0.487293	0.950372	1	1	1	1	0.91516	0.895803	1	0.574754	0.734568	0.90009	0.7111	0.987629	0.280867	0.084487	0.914805	1	0.369861	1	1	1	1	0.777968	0.959117	1	0.926017	0.324993	1.0006	1	1	0.665744	0.972958	0.785906	0.552263	0.439773
Cluster_Asparagine	0.111718	1.0001	0.998414	0.350866	1	0.838565	0.299543	0.523168	0.0465743	0.384162	1	0.605191	1	1	0.777013	1	1	1	1	0.0345055	0.981832	1	0.735933	0.217401	0.911585	0.489583	0.940522	0.166411	0.12244	0.729136	1	0.446475	1	1	1	1	0.221788	0.993069	1	0.825228	0.725849	1.0001	1	1	0.934456	0.995443	0.981756	0.869948	1
Cluster_Autophagy	0.91297	1.0003	0.995248	0.726511	0.711637	0.230444	1	0.078206	0.3835	0.967463	1	0.397057	0.726106	1	0.706802	1	0.409759	1	1	0.708668	0.946476	1	0.318062	0.0808262	0.757495	0.548121	0.96555	1	0.924563	0.955857	1	0.83044	1	1	1	0.288965	1	0.979348	1	0.506884	0.866932	1.0003	1	1	0.815957	0.986388	0.810948	0.0682778	1
Cluster_AZF1	0.738374	1.00035	0.994458	1	0.126644	0.902025	0.320066	0.138596	1	0.985765	1	0.801258	0.779287	0.289726	0.816473	0.342933	0.459419	1	1	0.124423	0.937837	1	0.750069	0.174992	0.723224	0.90503	0.988486	1	0.950969	0.930994	1	0.569917	1	1	1	1	1	0.975947	1	0.997771	0.732951	1.00035	1	1	0.788756	0.984137	0.757945	0.507907	0.147078
Cluster_BAS1	0.862874	1.00065	0.989731	0.939772	0.214236	0.16519	0.148886	0.185431	0.0423839	0.632244	0.454432	0.773595	0.234741	0.0771693	0.970295	0.172997	0.680988	1	1	0.930931	0.887624	1	0.673691	0.0268993	0.547784	0.921781	0.927774	0.0972835	0.499299	0.413652	1	0.978627	1	1	0.197342	1	1	0.955785	1	0.988799	0.826025	1.00065	1	1	0.643544	0.970737	0.151476	0.467914	0.496409
Cluster_Biotin	0.334259	1.00005	0.999207	1	1	0.598195	1	0.309462	0	0.619817	1	0.371652	0.194108	1	1	1	1	1	1	1	0.990875	1	1	0.466277	1	1	0.7561	1	0.349931	0.853898	1	1	1	1	1	1	1	0.996528	1	1	0.476394	1.00005	1	1	0.966673	0.997719	0.864908	0.639357	1
Cluster_CAD1	0.530115	1.00055	0.991304	0.660839	0.133834	0.291972	1	0.899118	0.000409283	0.040144	1	0.00329626	0.363029	0.596652	0.153088	0.131499	1	1	1	0.634084	0.904057	1	0.693467	0.409376	0.600945	0.388111	0.474209	1	0.331474	0.507151	1	0.303313	1	1	1	1	0.378249	0.96246	1	0.71222	0.669995	1.00055	1	0.0286734	0.688709	0.975184	0.822636	0.0525318	0.380819
Cluster_CBF1	0.530115	1.00055	0.991304	0.660839	0.0389113	0.969901	0.55646	0.0893654	1	0.344964	0.401113	0.389434	0.660232	0.926774	0.918721	0.483158	0.619665	1	1	0.89579	0.904057	1	0.693467	0.203705	0.914253	0.866485	0.969471	0.632603	0.331474	0.790589	1	0.563274	1	1	1	0.464904	1	0.96246	1	0.483013	0.853422	1.00055	1	1	0.688709	0.975184	0.550692	0.396347	0.1599
Cluster_CHA4	0.663835	1.00079	0.987375	0.379083	0.350614	0.710998	0.7615	0.582847	0.889622	0.21001	0.525652	0.76918	0.846467	0.980266	0.490839	1	0.394594	1	1	0.345104	0.863529	0.0819735	0.00789056	0.300409	0.476721	0.293466	0.652095	0.766983	0.159167	0.803422	1	0.0886006	0.284871	1	0.23706	0.597337	0.578061	0.945859	1	0.972681	0.173651	1.00079	1	1	0.581281	0.964104	0.343031	0.115847	0.200075
Cluster_CIN5	0.754304	1.00104	0.98346	0.804483	0.781507	0.912466	0.689254	0.97798	0.29126	0.256129	1	0.370451	0.934912	0.88613	0.269163	0.716447	0.0945067	1	1	0.349067	0.824808	1	0.448726	0.998006	0.754734	0.115245	0.392014	0.852229	0.0107077	0.925531	1	0.656199	1	1	1	1	0.928228	0.92954	1	0.455789	0.863469	1.00104	1	0.0932908	0.490589	0.953147	0.6869	0.669121	0.627416
Cluster_CRZ1	0.00897354	1.00055	0.991304	0.660839	0.0389113	0.291972	1	0.711075	0.197808	0.587315	1	0.632979	0.660232	0.596652	0.340285	1	1	1	1	0.335441	0.904057	0.0414395	0.693467	0.837283	0.914253	0.866485	0.209925	0.632603	0.0500431	0.790589	1	0.563274	1	0.031197	0.169724	1	0.378249	0.96246	1	0.0965784	0.954189	1.00055	1	0.239693	0.950024	0.975184	0.550692	0.180211	0.1599
Cluster_CUP9	0.858286	1.00045	0.99288	0.856998	1	0.0690569	0.445247	0.820364	0.10795	0.270847	0.342589	0.210252	0.246325	0.811722	0.311451	0.417244	0.546563	1	1	0.842777	0.920793	1	0.895765	0.0608735	0.659258	0.082037	0.617776	1	0.171552	0.867422	1	0.416143	1	1	0.14116	1	0.287466	0.969181	1	0.437679	0.697544	1.00045	1	0.200843	0.737039	0.979651	0.889513	0.58211	0.562218
Cluster_DAL81	0.869257	1.00025	0.996038	1	1	0.0765717	0.189307	0.491173	1	0.927338	1	0.612401	1	0.235708	0.22411	1	0.35554	1	1	1	0.955195	1	0.473974	0.436954	0.793388	0.14448	0.645679	0.365597	0.571471	0.453935	1	0.109919	1	1	1	1	1	0.982761	1	0.898368	0.781631	1.00025	1	0.117099	0.844095	0.988644	0.980087	0.939844	1
Cluster_DAL82	0.525633	1.00084	0.986591	0.870557	0.199546	0.441728	0.130072	0.251929	1	0.933515	0.179849	0.651838	0.668871	0.427796	0.400922	0.639472	0.775578	1	1	0.851878	0.855643	0.404857	0.643245	0.388725	0.821981	0.974385	0.00860798	0.787269	0.765086	0.538213	1	0.849609	1	1	1	0.619601	0.13148	0.942573	1	0.581394	0.612497	1.00084	1	1	0.561894	0.961903	0.0847283	0.758859	0.688558
Cluster_DIG1	0.0457743	1.00035	0.994458	0.138344	0.765625	0.706735	1	0.690302	1	0.921709	0.278353	0.51711	0.779287	0.578365	0.560574	1	0.459419	1	1	0.383836	0.937837	1	0.927904	0.912254	0.723224	0.639207	0.934969	0.471194	0.76613	0.989006	1	0.256124	1	1	1	1	0.584288	0.975947	1	0.381166	0.920524	1.00035	1	0.160012	0.788756	0.984137	0.757945	0.216065	0.147078
Cluster_DOT6	0.905482	1.00109	0.982679	0.643563	0.611421	0.069814	0.894837	0.719897	1	0.358351	0.0761228	0.996567	0.429095	0.710473	0.683088	0.369393	0.280885	1	1	0.605	0.817274	1	0.914572	0.981123	0.925048	0.796886	0.543603	0.582013	0.353073	0.147397	1	0.699371	1	1	0.310713	0.345132	0.750443	0.92631	1	0.0515934	0.495353	1.00109	1	1	0.474222	0.950971	0.654389	0.138732	0.454599
Cluster_DrugResistance	0.942069	1.00035	0.994458	0.779667	0.765625	0.415957	1	0.925164	1	0.463688	1	0.236986	0.000311241	0.578365	0.816473	0.342933	0.459419	1	1	0.383836	0.937837	0.192355	0.750069	0.912254	0.723224	0.639207	0.934969	1	0.76613	0.930994	1	0.87386	0.13641	1	1	1	1	0.975947	1	0.885231	0.732951	1.00035	1	1	0.979164	0.984137	0.362008	0.507907	0.789355
Cluster_Endocytosis	0.291277	1.00055	0.991304	0.363688	0.63853	0.969901	0.55646	0.899118	1	0.79542	0.401113	0.838826	0.660232	0.360964	0.574814	1	1	1	1	0.131031	0.904057	0.285193	0.462449	0.837283	0.600945	0.866485	0.729994	0.632603	0.799809	0.507151	1	0.961373	1	1	1	1	0.748292	0.96246	1	0.255135	0.853422	1.00055	1	0.239693	0.688709	0.975184	0.202527	0.640211	0.676366
Cluster_FattyAcid	0.463659	1.00109	0.982679	0.829892	0.611421	0.992625	0.283188	0.544651	0.0820772	0.0400662	0.641437	0.0300946	0.829321	0.551556	0.960975	0.133334	0.280885	1	1	0.389327	0.817274	1	0.365298	0.457049	0.361032	0.796886	0.178551	0.298674	0.208125	0.595861	1	0.987224	1	1	1	0.345132	1	0.92631	1	0.233604	0.800619	1.00109	1	1	0.474222	0.950971	0.654389	0.431821	0.265124
Cluster_FHL1	0.341568	1.00299	0.953421	0.636444	0.582604	0.544469	0.941202	0.290307	0.420131	0.988797	0.0546771	0.90202	0.505707	0.00705475	0.909478	0.135148	0.890263	1	1	0.891346	0.576469	0.269314	0.194284	0.647928	0.998586	0.851412	0.957534	0.606716	0.653054	0.334322	1	0.591605	1	1	0.0795203	0.85142	0.0897472	0.811427	1	0.021737	0.0628006	1.00299	1	0.0159016	0.130457	0.871765	0.57696	0.131776	0.20319
Cluster_FKH1	0.431489	1.00035	0.994458	0.0301585	0.765625	0.706735	0.712418	0.925164	1	0.921709	0.278353	0.236986	0.0300521	0.957955	0.560574	0.342933	0.111798	1	1	0.762807	0.937837	1	0.469643	0.912254	0.723224	0.90503	0.141224	1	1	0.930994	1	0.87386	1	1	1	1	0.195461	0.975947	1	0.136204	0.920524	1.00035	1	0.160012	0.788756	0.984137	0.757945	0.507907	0.421822
Cluster_FKH2	0.192914	1.00099	0.984242	0.563439	0.314933	0.869039	0.415945	0.428442	1	0.907493	0.230503	0.305875	0.34472	0.925764	0.682469	1	0.510685	1	1	0.746667	0.832412	1	0.706725	0.466924	0.940742	0.989232	0.804684	0.838135	0.583178	0.939629	1	0.233382	1	1	1	0.303806	0.701022	0.932781	1	0.200654	0.091331	1.00099	1	1	0.50752	0.955329	0.719118	0.729799	0.367992
Cluster_Flavin	1	1.0002	0.99683	1	0.563505	0.818737	0.509379	0.365022	1	0.842893	1	0.844144	0.171802	0.953665	0.727981	0.213344	0.296343	1	1	0.560514	0.963993	1	0.930282	0.635305	0.83098	0.32292	0.326795	1	0.436898	0.531621	1	0.693631	1	1	1	1	1	0.986185	1	0.969463	1	1.0002	1	1	0.873201	0.990905	0.909243	0.863147	1
Cluster_Flocculation	0.803593	1.0002	0.99683	0.578645	0.161398	0.472074	1	0.772652	1	0.842893	1	1	0.57823	0.953665	0.0775659	0.213344	1	1	1	0.159341	0.963993	1	0.666405	0.635305	0.83098	0.073174	0.326795	0.305142	0.436898	0.531621	1	0.693631	1	1	1	0.203354	1	0.986185	1	0.444215	0.924855	1.0002	1	1	0.873201	0.990905	0.991145	0.863147	0.589332
Cluster_FZF1	0.123418	1.00055	0.991304	1	0.63853	0.898478	0.858944	0.899118	1	0.040144	0.401113	0.00329626	0.0448639	0.360964	0.574814	0.483158	1	1	1	0.00802387	0.904057	1	0.999342	0.947401	0.914253	0.648976	0.729994	0.632603	0.0500431	0.985792	1	0.815074	1	1	1	0.12052	1	0.96246	1	0.255135	0.954189	1.00055	1	1	0.688709	0.975184	0.989796	0.180211	0.0498445
Cluster_GAL4	0.260515	1.0004	0	0.479878	1.49686e-06	0	0.384046	0.762996	0.0719258	0	1	0.86077	0.479287	0.196901	0	0.0750464	1	1	1	1.41021e-06	0	1	0	0.104619	0	0.00866633	0	0.149088	0.293423	0	1	0.00480187	1	1	1	1	1	0	1	0	0.115668	1.0004	1	1	0	0	0	0.0279003	1
Cluster_GAL4	0.260515	1.0004	0	0.479878	1.49686e-06	0	0.384046	0.762996	0.0719258	0	1	0.86077	0.479287	0.196901	0	0.0750464	1	1	1	1.41021e-06	0	1	0	0.104619	0	0.00866633	0	0.149088	0.293423	0	1	0.00480187	1	1	1	1	1	0	1	0	0.115668	1.0004	1	1	0	0	0	0.0279003	1
Cluster_Galactose
Cluster_GAT1	0.741266	1.00069	0.988945	0.117834	0.767976	0.846604	0.405795	0.673203	0.838742	0.33281	1	0.6427	0.529655	0.503506	0.683499	0.568327	0.707838	1	1	0.497302	0.879519	1	0.563536	0.861808	0.522992	0.809326	0.898846	0.720429	0.359251	0.663932	1	0.499737	1	1	1	1	1	0.952465	1	0.814518	0.732597	1.00069	1	1	0.622083	0.968521	0.417671	0.390015	0.0114113
Cluster_GAT3	0.111914	1.0002	0.99683	1	0.563505	0.818737	1	0.772652	1	0.509696	1	0.475317	0.57823	1	0.950288	1	1	1	1	1	0.963993	1	0.930282	0.635305	0.83098	0.739496	0.748543	0.305142	0.436898	0.895525	1	0.271875	0.0803829	1	1	1	1	0.986185	1	0.444215	0.277931	1.0002	1	1	0.873201	0.990905	0.559576	0.983092	1
Cluster_GCN4	0.296163	1.00109	0.982679	0.643563	0.808363	0.875834	0.720201	6.69073e-05	0.333329	0.530814	0.641437	0.275764	0.945471	0.383265	0.816464	0.732974	0.563	1	1	0.934649	0.817274	0.489147	0.0514524	0.000775192	0.737702	0.994019	0.855077	0.582013	0.697718	0.356847	1	0.084644	1	1	1	0.345132	0.489038	0.92631	1	0.967775	0.660782	1.00109	1	1	0.474222	0.950971	0.413355	0.431821	0.66582
Cluster_GCR1	0.431489	1.00035	0.994458	1	0.387712	0.156239	0.320066	0.925164	0.46639	0.921709	1	0.961352	0.407021	0.578365	0.560574	0.058494	1	1	1	1	0.937837	0.017129	0.0538514	0.987674	0.723224	0.639207	0.768996	1	0.76613	0.989006	1	0.87386	1	1	0.111615	0.328259	0.584288	0.975947	1	0.674508	0.448468	1.00035	1	1	0.788756	0.984137	0.362008	0.216065	0.0330123
Cluster_GCR2	0.70308	1.0005	0.992092	0.884797	0.0993164	0.943929	1	0.864928	0.670149	0.201313	1	0.782686	0.606195	0.237222	0.446889	0.451189	1	1	1	0.0971241	0.912387	1	0.343252	0.98176	0.629428	0.965384	0.789992	1	0.248306	0.999993	1	0.769293	1	1	1	1	0.714652	0.965814	1	0.587198	0.786721	1.0005	1	1	0.712465	0.977415	0.600136	0.485025	0.11988
Cluster_GeneralTFs	0.360817	1.00129	0.97956	0.588658	0.968137	0.666868	0.990258	0.581165	0.843814	0.967245	0.0287147	0.361496	0.771766	0.959706	0.536122	1	0.655175	1	1	0.886172	0.976685	1	0.520951	0.594891	0.888942	0.181924	0.711141	0.396878	0.858367	0.671796	1	0.200205	1	1	0.355832	1	0.828431	0.996342	1	0.296034	0.634732	1.00129	1	1	0.785628	0.998402	0.998661	0.366837	0.614177
Cluster_GLN3	0.243547	1.00065	0.989731	0.235336	0.214236	0.767061	0.358049	0.817509	0.302545	0.207793	1	0.0192478	0.0261148	0.915318	0.181888	1	0.299888	1	1	0.445134	0.887624	0.327537	0.459328	0.211848	0.885338	0.764359	0.137001	0.693774	0.283871	0.706753	1	0.685305	1	1	1	0.159143	0.463827	0.955785	1	0.304571	0.647572	1.00065	1	1	0.643544	0.970737	0.74778	0.024824	0.496409
Cluster_Glutamate	0.803593	1.0002	0.99683	0.578645	0.563505	0.472074	1	0.772652	0.20556	0.147563	1	0.844144	0.57823	0.739495	0.355254	1	1	1	1	0.560514	0.963993	1	0.291946	0.635305	0.83098	0.739496	0.326795	0.305142	0.821446	0.531621	1	0.693631	1	1	1	0.203354	1	0.986185	1	0.799382	0.651298	1.0002	1	1	0.873201	0.990905	0.559576	0.544119	0.179963
Cluster_Glutathione	0.101021	1.0003	0.995248	0.330649	0.711637	0.540576	0.058835	0.273386	1	0.585362	1	0.720073	0.330161	0.721137	0.137595	1	1	1	1	0.708668	0.946476	1	0.877094	0.591104	0.972854	0.548121	0.186798	1	0.352762	0.387597	1	1	1	1	1	1	0.528741	0.979348	1	0.506884	0.866932	1.0003	1	1	0.815957	0.986388	0.810948	0.625496	0.343324
Cluster_Glycerol	0.211225	1.00025	0.996038	0.251092	0.236653	0.911593	0.0334256	0.843022	0.00896801	0.37201	0.207848	0.90208	1	0.567283	0.845321	1	1	1	1	0.233865	0.955195	1	0.473974	0.436954	0.793388	0.441879	0.902839	1	0.0539617	0.842366	1	1	1	1	1	1	0.465776	0.982761	1	0.898368	0.159353	1.00025	1	1	0.844095	0.988644	0.483967	0.939844	0.671262
Cluster_Glycogen	0.260483	1.00015	0.997621	1	1	0.645406	1	0.228016	1	0.238096	1	0.751937	0.476623	0.553916	1	1	0.231713	1	1	1	0.972872	1	0.864313	0.449489	0.870351	1	0.985498	0.238929	0.281645	0.942213	1	1	1	1	1	1	1	0.989621	1	0.621798	0.1081	1.00015	1	1	0.90331	0.993171	0.646993	0.703633	0.103472
Cluster_GTS1	0.899867	1.00089	0.985807	0.119274	0.682072	0.557191	0.959465	0.949352	0.925237	0.0469425	0.196572	0.340276	0.707953	0.53007	0.922028	0.66048	0.79447	1	1	0.873772	0.847828	1	0.0968538	0.813936	0.805394	0.923335	0.542992	0.202369	0.0595353	0.498512	1	0.87664	1	1	1	0.262029	0.643721	0.939298	1	0.921545	0.692449	1.00089	1	1	0.880505	0.959707	0.0732725	0.320313	0.0505393
Cluster_HAL9	0.925787	1.00055	0.991304	0.907193	0.340027	0.527792	0.0894732	0.711075	0.197808	0.147444	0.401113	0.632979	0.660232	0.166512	0.340285	0.483158	1	1	1	0.89579	0.904057	1	0.867878	0.203705	0.914253	0.179585	0.729994	1	0.0500431	0.507151	1	0.563274	1	1	1	0.464904	1	0.96246	1	0.87686	0.223721	1.00055	1	1	0.950024	0.975184	0.950028	0.180211	0.0114779
Cluster_HAP2	0.921796	1.00074	0.988159	0.149787	0.0458696	0.782694	0.452416	0.970152	0.411603	0.0379981	1	0.710818	0.818918	0.787586	0.768225	1	0.363564	1	1	0.797424	0.871487	1	0.822343	0.903189	0.499322	0.659415	0.252876	1	0.113034	0.33358	1	0.560206	1	1	1	1	0.847611	0.949156	1	0.742128	0.241921	1.00074	1	1	0.601337	0.96631	0.11329	0.15176	0.0602931
Cluster_HAP3	0.871351	1.00084	0.986591	0.669614	0.00723211	0.634744	0.790965	0.99816	0.516546	0.515474	0.547264	0.926125	0.870146	0.961046	0.108652	1	0.0489535	1	1	0.391235	0.855643	1	0.643245	0.881884	0.455142	0.759998	0.374838	0.179507	0.765086	0.538213	1	0.253288	1	1	1	0.619601	0.881432	0.942573	1	0.879831	0.421626	1.00084	1	1	0.561894	0.961903	0.309912	0.026801	0.4489
Cluster_HAP4	0.922644	1.00094	0.985024	0.744072	0.0494888	0.661579	0.619819	0.961464	0.938674	0.00142417	0.00956716	0.244219	0.743385	0.891586	0.416043	1	0.811773	1	1	0.481414	0.987211	1	0.786673	0.94096	0.414868	0.470194	0.490257	0.225855	0.000668353	0.0496688	1	0.191533	1	1	1	0.660506	0.90775	0.936034	1	0.950073	0.880119	1.00094	1	1	0.869269	0.957515	0.750778	0.0134412	0.161432
Cluster_HAP5	0.663835	1.00079	0.987375	0.626839	0.06211	0.939967	0.49744	0.913826	0.889622	0.390001	1	0.76918	0.846467	0.517587	0.490839	0.238182	0.394594	1	1	0.0180737	0.863529	1	0.873239	0.836944	0.476721	0.965977	0.427167	1	0.311585	0.0798093	1	0.817549	1	1	1	0.597337	0.578061	0.945859	1	0.663129	0.522675	1.00079	1	1	0.581281	0.964104	0.839566	0.817308	0.646265
Cluster_Heme	0.534073	1.0004	0.993669	0.0511709	0.45845	0.9491	1	0.472217	1	0.0217641	1	0.86077	0.822144	0.196901	0.0490761	1	1	1	1	0.172607	0.929276	0.216636	0.836529	0.29228	0.690502	0.0474208	0.38242	0.517209	0.0252681	0.669538	1	0.122245	1	1	1	0.000542116	0.241274	0.972558	1	0.551871	0.583999	1.0004	1	1	0.76246	0.981892	0.98521	0.153871	0.495139
Cluster_HIR1	0.123418	1.00055	0.991304	0.363688	0.63853	0.749553	0.55646	0.982997	0.197808	0.79542	0.401113	0.632979	0.363029	0.360964	0.574814	1	1	1	1	0.131031	0.904057	0.285193	0.243922	0.409376	0.988416	0.975274	0.474209	0.0638501	0.574292	0.936047	1	0.815074	1	1	1	0.464904	0.378249	0.96246	1	0.0230442	0.853422	1.00055	1	1	0.688709	0.975184	0.950028	0.00728637	0.1599
Cluster_HIR2	0.0888529	1.0004	0.993669	1	0.809507	0.823568	1	0.948331	0.0719258	0.358104	1	0.341089	1	0.196901	0.183999	1	0.504903	1	1	1	0.929276	1	0.333319	0.29228	0.690502	0.411443	0.106768	1	0.830824	0.282582	1	0.336452	1	1	1	0.365384	1	0.972558	1	0.278743	0.953258	1.0004	1	0.180681	0.76246	0.981892	0.313086	0.683337	0.201871
Cluster_Histidine	0.650693	1.0003	0.995248	1	0.711637	0.958225	0.254543	0.078206	0.3835	0.585362	1	0.720073	1	0.146848	0.706802	1	1	1	1	0.708668	0.998787	1	0.629886	0.0808262	0.757495	0.867055	0.96555	0.420796	0.680825	0.78562	1	0.179011	0.118123	1	1	1	1	0.979348	1	0.206193	0.0887448	1.0003	1	1	0.815957	0.986388	0.41857	0.625496	1
Cluster_HMS1	1	1.00035	0.994458	0.407571	1	0.902025	0.712418	0.138596	1	0.463688	0.278353	0.51711	0.779287	0.995375	0.816473	0.342933	0.459419	1	1	0.124423	0.937837	1	0.469643	0.174992	0.723224	0.90503	0.460238	1	0.199694	0.727471	1	0.87386	1	1	0.111615	1	0.584288	0.975947	1	0.674508	0.98922	1.00035	1	1	0.788756	0.984137	0.943457	0.216065	0.421822
Cluster_HSF1	0.0584498	1.00069	0	0.00196518	1	0	0.0171706	3.5632e-05	0.00397041	0	1	0.10353	0.00195163	0.0131127	0.0112153	7.70126e-05	0.331945	1	1	0.0014477	0	1	4.09505e-05	2.28436e-05	0	1.4416e-05	0	1	0.0751929	0	1	5.12479e-09	1	1	1	0.179208	5.71336e-05	0	1	0.000509053	0.0641406	1.00069	1	0.045201	0	0	0	0	0.00234568
Cluster_HSF1	0.0584498	1.00069	0	0.00196518	1	0	0.0171706	3.5632e-05	0.00397041	0	1	0.10353	0.00195163	0.0131127	0.0112153	7.70126e-05	0.331945	1	1	0.0014477	0	1	4.09505e-05	2.28436e-05	0	1.4416e-05	0	1	0.0751929	0	1	5.12479e-09	1	1	1	0.179208	5.71336e-05	0	1	0.000509053	0.0641406	1.00069	1	0.045201	0	0	0	0	0.00234568
Cluster_IME4	0.625135	1.00045	0.99288	0.54646	0.22845	0.729689	1	1	1	0.087985	1	0.210252	1	0.588013	0.568079	1	1	1	1	0.0679779	0.920793	1	0.718057	0.996491	0.940447	0.082037	0.617776	0.181104	0.0534981	0.867422	1	0.930195	0.171857	1	1	0.400458	0.287466	0.969181	1	0.437679	0.697544	1.00045	1	0.200843	0.737039	0.979651	0.889513	0.938312	0.865031
Cluster_INO2	0.00412626	1.00079	0.987375	0.846916	1	0.939967	0.49744	0.371714	0.110329	0.769811	1	0.094914	0.184325	0.706037	0.30044	1	0.394594	1	1	0.345104	0.863529	1	0.194656	0.489826	0.838332	0.05711	0.0702196	0.766983	0.509822	0.579236	1	0.817549	1	1	1	1	0.578061	0.945859	1	0.132538	0.856227	1.00079	1	1	0.581281	0.964104	0.839566	0.920137	0.858233
Cluster_INO4	0.796576	1.00109	0.982679	0.829892	0.808363	0.617728	0.894837	0.857865	0.96653	0.00271691	1	0.152584	0.243882	0.836545	0.520437	1	0.563	1	1	0.389327	0.817274	1	0.825283	0.881568	0.737702	0.275358	0.178551	0.298674	0.04722	0.909729	1	0.509415	1	1	0.310713	0.713773	0.750443	0.92631	1	0.386072	0.495353	1.00109	1	0.422022	0.474222	0.950971	0.654389	0.606445	0.844222
Cluster_InvasiveGrowth	0.5568	1.0001	0.998414	1	1	0.838565	1	0.523168	1	0.384162	1	0.138114	1	1	0.278531	1	1	1	1	0.337048	0.981832	1	0.735933	0.715152	0.911585	0.489583	0.571678	1	0.12244	0.97866	1	0.446475	1	1	1	1	1	0.993069	1	0.825228	1	1.0001	1	1	0.934456	0.995443	0.74806	0.408766	1
Cluster_Isoleucine	0.32143	1.0003	0.995248	1	0.313121	0.540576	1	0.273386	1	0.585362	1	0.938481	0.0152016	0.146848	0.706802	0.302298	1	1	1	0.309718	0.946476	1	0.981597	0.282804	0.757495	0.548121	0.840128	1	0.924563	0.387597	1	0.83044	1	1	1	1	1	0.979348	1	0.794921	0.866932	1.0003	1	1	0.815957	0.986388	0.41857	0.974414	1
Cluster_IXR1	0.32143	1.0003	0.995248	0.726511	1	0.818329	1	0.273386	1	0.847088	0.243921	0.938481	0.330161	0.920887	0.706802	0.302298	1	1	1	0.708668	0.946476	1	0.629886	0.591104	0.757495	0.229397	0.96555	1	0.352762	0.78562	1	0.83044	1	1	0.096465	0.0394217	0.528741	0.979348	1	0.950092	0.866932	1.0003	1	0.138822	0.815957	0.986388	0.41857	0.625496	0.73685
Cluster_LEU3	0.70308	1.0005	0.992092	0.305055	0.283793	0.377725	0.831446	0.375777	1	0.433092	1	0.122733	0.110674	0.880915	0.869967	0.111742	1	1	1	0.0971241	0.912387	1	0.986585	0.537796	0.629428	0.826938	0.789992	1	0.248306	0.206013	1	0.492376	1	1	1	1	0.333311	0.965814	1	0.587198	0.563778	1.0005	1	1	0.712465	0.977415	0.993744	0.969186	0.62263
Cluster_Leucine	0.803593	1.0002	0.99683	1	0.161398	0.973946	0.509379	0.00916523	1	0.509696	1	0.14808	0.57823	0.368338	0.727981	1	1	1	1	1	0.963993	1	0.930282	0.0472527	0.83098	0.32292	0.952597	0.305142	0.436898	0.531621	1	0.693631	1	1	1	1	1	0.986185	1	0.799382	0.924855	1.0002	1	1	0.873201	0.990905	0.991145	0.863147	0.589332
Cluster_Lysine	0.540938	1.00025	0.996038	1	0.645218	0.679453	1	0.175796	0.00896801	0.716225	0.207848	0.26969	1	0.854304	0.551971	1	0.35554	1	1	0.233865	0.955195	1	0.794691	0.148152	0.981348	0.14448	0.902839	1	0.88394	0.842366	1	0.772077	1	1	1	1	1	0.982761	1	0.898368	0.0245241	1.00025	1	0.117099	0.844095	0.988644	0.483967	0.7481	0.671262
Cluster_MAC1	0.534073	1.0004	0.993669	0.190648	0.45845	0.311591	0.759328	0.762996	0.542226	0.128621	1	0.341089	1	0.712296	0.425508	1	1	1	1	0.0441171	0.929276	1	0.995143	0.29228	0.690502	0.411443	0.693695	1	0.293423	0.980536	1	1	1	1	1	0.365384	0.63329	0.972558	1	0.938082	0.312938	1.0004	1	0.180681	0.76246	0.981892	0.918405	0.402649	0.495139
Cluster_MAL13	0.793013	1.00074	0.988159	0.0539264	0.304154	0.782694	0.452416	0.306669	0.411603	0.670038	0.147165	0.867821	0.818918	0.00120712	0.586668	0.593478	0.732428	1	1	0.299074	0.871487	1	0.266472	0.217686	0.499322	0.846803	0.706508	0.379726	0.827258	0.621271	1	0.779842	1	1	1	1	0.542044	0.949156	1	0.95367	0.241921	1.00074	1	1	0.912533	0.96631	0.11329	0.0522134	0.0602931
Cluster_MAL33	0.996782	1.00099	0.984242	0.563439	0.911262	0.869039	0.860893	0.908501	0.654815	0.665359	0.230503	0.971047	0.775297	0.971252	0.682469	0.326232	1	1	1	0.524507	0.985875	1	0.839972	0.996763	0.771722	0.865509	0.244067	0.529386	0.583178	0.939629	1	0.609224	1	1	1	1	1	0.997832	1	0.200654	0.817733	1.00099	1	1	0.857803	0.955329	0.877417	0.856322	0.0316006
Cluster_Maltose	1	1.00005	0.999207	1	1	1	1	0.309462	1	0.619817	1	1	1	1	1	1	1	1	1	0.185777	0.990875	1	1	0.466277	0.954771	1	0.7561	0.0869867	0.349931	1	1	1	1	1	1	1	1	0.996528	1	0.581928	0.476394	1.00005	1	1	0.966673	0.997719	0.864908	1	1
Cluster_ManualAFT1targets	0.409053	1.0002	0	1	0.161398	0	1	1	0.0021676	0.147563	1	0.0190691	0.171802	0.739495	0.727981	0.0187821	1	1	1	0.00118959	0	1	0.666405	0.635305	0	1	0	0.0402903	0.436898	0	1	0.00429131	1	4.86085e-05	1	1	0	0	1	0.799382	0.651298	1.0002	1	1	0	0	0	0.863147	0.179963
Cluster_ManualAFT1targets	0.409053	1.0002	0	1	0.161398	0	1	1	0.0021676	0.147563	1	0.0190691	0.171802	0.739495	0.727981	0.0187821	1	1	1	0.00118959	0	1	0.666405	0.635305	0	1	0	0.0402903	0.436898	0	1	0.00429131	1	4.86085e-05	1	1	0	0	1	0.799382	0.651298	1.0002	1	1	0	0	0	0.863147	0.179963
Cluster_ManualG1genes	0.3264	1.00154	0.975674	0.989583	0.714503	0.867368	0.76771	0.981629	0.926347	0.914041	1	0.642449	0.0627871	0.986471	0.96019	0.545967	0.490218	1	1	0.528043	0.967615	1	0.999259	0.994897	0.587813	0.988912	0.990835	0.764849	0.899086	0.148667	1	0.714886	1	1	1	0.828493	0.299028	0.897731	1	0.000525807	0.880682	1.00154	1	0.00672356	0.7234	0.931598	0.950704	0.406223	0.267304
Cluster_ManualHAP1targets	0.0276437	1.00154	0	0.2432	3.73402e-05	0	2.25786e-09	0.0130283	0.0227253	0	0.415455	1.06133e-09	0.00997971	0.657264	0	0.103449	0.74774	1	1	0.00699036	0	1	1.12218e-06	3.87912e-07	0	3.36798e-05	0	0.281804	0	0	1	1.63198e-11	1	1	0.0948256	0.0893225	6.92145e-08	0	1	0	0.000692799	1.00154	1	0.176658	0	0	0	0	3.35783e-06
Cluster_ManualHAP1targets	0.0276437	1.00154	0	0.2432	3.73402e-05	0	2.25786e-09	0.0130283	0.0227253	0	0.415455	1.06133e-09	0.00997971	0.657264	0	0.103449	0.74774	1	1	0.00699036	0	1	1.12218e-06	3.87912e-07	0	3.36798e-05	0	0.281804	0	0	1	1.63198e-11	1	1	0.0948256	0.0893225	6.92145e-08	0	1	0	0.000692799	1.00154	1	0.176658	0	0	0	0	3.35783e-06
Cluster_ManualMethionine	0.148089	1.00094	0.985024	0.908053	0.275149	0.809581	0.376222	0.207488	0.211304	0.0339015	0.052908	0.96014	0.907718	0.624983	0.250579	1	0.211219	1	1	0.713343	0.840085	1	0.280969	0.224952	0.788624	0.83582	0.490257	0.225855	0.185212	0.70192	1	0.755989	0.328465	1	1	0.660506	0.391507	0.936034	1	0.76699	0.760949	1.00094	1	1	0.525034	0.957515	0.750778	0.985199	0.761483
Cluster_ManualM-G1genes	0.211225	1.00025	0.996038	1	1	0.911593	0.189307	1	1	0.37201	1	0.90208	1	0.854304	0.551971	1	1	1	1	0.233865	0.955195	1	1	1	0.793388	0.441879	0.902839	1	0.235038	0.453935	1	0.379845	0.00411307	1	1	1	0.465776	0.982761	1	0.306423	0.0245241	1.00025	1	1	0.844095	0.988644	0.483967	0.408131	0.671262
Cluster_ManualYap1Targets	1.25423e-14	1.00164	0	0.303993	2.11396e-11	0	1.7123e-05	9.51695e-07	4.80561e-10	0	1	3.52367e-05	2.27638e-07	0	0	0.123081	0.300196	1	1	1.07031e-07	0	1	0	0	0	0.0615615	0	0.0623315	3.1796e-11	0	1	0.113724	1	1	1	0.551098	0.186457	0	1	0	0.0215286	1.00164	1	0.194498	0	0	0	0	0.000216961
Cluster_ManualYap1Targets	1.25423e-14	1.00164	0	0.303993	2.11396e-11	0	1.7123e-05	9.51695e-07	4.80561e-10	0	1	3.52367e-05	2.27638e-07	0	0	0.123081	0.300196	1	1	1.07031e-07	0	1	0	0	0	0.0615615	0	0.0623315	3.1796e-11	0	1	0.113724	1	1	1	0.551098	0.186457	0	1	0	0.0215286	1.00164	1	0.194498	0	0	0	0	0.000216961
Cluster_ManualZAP1targets	0.527501	1.00069	0.988945	0.787537	0.50275	0.0386115	0.691682	0.446802	0.357126	0.33281	0.479286	0.425882	0.787012	0.503506	0.12854	1	0.331945	1	1	0.253851	0.879519	1	0.563536	0.300487	0.870077	0.599482	0.110004	0.720429	0.183364	0.663932	1	0.276238	1	1	1	0.179208	0.82724	0.952465	1	0.994142	0.327911	1.00069	1	1	0.622083	0.968521	0.417671	0.0169409	0.299934
Cluster_ManualZAP1targets-2	0.0290354	1.00179	0	0.145796	0.000351125	0	0.546184	4.15692e-07	8.84596e-06	0	0.00529173	0.000310535	0.0343535	0	0	0.628071	0.000573003	1	1	0.00350998	0	0.294801	5.10738e-12	0	0	1.25511e-11	0	1.36265e-08	3.30787e-09	0	1	2.62272e-07	1	1	1	1.72951e-05	0.245305	0	1	1.18719e-06	2.40366e-07	1.00179	1	1	0	0	0	0	0.00073836
Cluster_ManualZAP1targets-2	0.0290354	1.00179	0	0.145796	0.000351125	0	0.546184	4.15692e-07	8.84596e-06	0	0.00529173	0.000310535	0.0343535	0	0	0.628071	0.000573003	1	1	0.00350998	0	0.294801	5.10738e-12	0	0	1.25511e-11	0	1.36265e-08	3.30787e-09	0	1	2.62272e-07	1	1	1	1.72951e-05	0.245305	0	1	1.18719e-06	2.40366e-07	1.00179	1	1	0	0	0	0	0.00073836
Cluster_MATa1	0.00897354	1.00055	0	0.010066	0.63853	0.0294092	0.0894732	0	0.197808	0	0.00108914	0.0181775	0.00018781	0.011023	0	1	1	1	1	0.000135736	0	1	0.0962999	0	0	0.388111	0	1	0.0122059	0	1	0.00140319	1	1	0.0139428	0.12052	1	0	1	0	0.0855921	1.00055	1	1	0	0	0	0	0
Cluster_MATa1	0.00897354	1.00055	0	0.010066	0.63853	0.0294092	0.0894732	0	0.197808	0	0.00108914	0.0181775	0.00018781	0.011023	0	1	1	1	1	0.000135736	0	1	0.0962999	0	0	0.388111	0	1	0.0122059	0	1	0.00140319	1	1	0.0139428	0.12052	1	0	1	0	0.0855921	1.00055	1	1	0	0	0	0	0
Cluster_Mating	0.0199272	1.0004	0.993669	0.00914611	0.809507	0.589902	0.759328	0.762996	1	0.639663	0.311218	0.622723	0.479287	0.897768	0.425508	1	0.504903	1	1	0.454246	0.929276	1	0.995143	0.806729	0.690502	0.715128	0.894499	1	0.968132	0.980536	1	0.122245	1	1	1	1	1	0.972558	1	0.938082	0.953258	1.0004	1	1	0.76246	0.981892	0.313086	0.683337	0.495139
Cluster_MBP1	0.754304	1.00104	0.98346	0.989322	0.92492	0.996274	0.878961	0.97798	0.29126	0.870425	1	0.219773	0.803871	0.459761	0.993279	0.716447	0.0945067	1	1	0.565787	0.824808	1	0.994826	0.926808	0.754734	0.991967	0.994771	0.852229	0.799071	0.63118	1	0.144413	1	1	1	0.697016	0.726679	0.92954	1	0.0703744	0.413256	1.00104	1	1	0.490589	0.953147	0.6869	0.0768787	0.228652
Cluster_MCM1	0.123418	1.00055	0.991304	0.660839	0.133834	0.749553	0.858944	0.899118	0.72239	0.587315	1	0.632979	0.906941	0.981332	0.574814	0.483158	1	1	1	0.634084	0.904057	1	0.693467	0.947401	0.988416	0.648976	0.729994	0.0638501	0.799809	0.507151	1	0.303313	1	1	1	0.464904	0.378249	0.96246	1	0.71222	0.0855921	1.00055	1	1	0.688709	0.975184	0.822636	0.832773	0.380819
Cluster_MET31	0.767942	1.00055	0.991304	0.660839	0.340027	0.898478	0.0894732	0.000743933	1	0.147444	0.401113	0.632979	0.660232	0.166512	0.574814	1	1	1	1	0.634084	0.904057	1	0.243922	0.0030719	0.600945	0.975274	0.729994	1	0.574292	0.790589	1	0.961373	1	1	1	1	0.378249	0.96246	1	0.255135	0.853422	1.00055	1	1	0.688709	0.975184	0.822636	0.640211	0.380819
Cluster_MET4	0.205198	1.00074	0.988159	0.330537	0.304154	0.9651	0.0830922	0.149694	0.411603	0.00779179	0.147165	0.867821	0.149298	0.787586	0.586668	1	0.732428	1	1	0.954224	0.871487	0.367375	0.266472	0.097158	0.499322	0.846803	0.706508	1	0.113034	0.621271	1	0.333449	0.269721	1	1	0.573772	0.0908488	0.949156	1	0.553153	0.628725	1.00074	1	1	0.601337	0.96631	0.378931	0.726129	0.831737
Cluster_MIG1	0.598961	1.00074	0.988159	0.960916	0.13269	0.782694	0.930825	0.516868	0.866393	0.465915	0.147165	0.506466	0.960771	0.408738	0.38374	1	0.126416	1	1	0.954224	0.871487	1	0.657252	0.217686	0.854385	0.434666	0.706508	0.379726	0.435483	0.834578	1	0.560206	1	1	1	0.573772	1	0.949156	1	0.177722	0.241921	1.00074	1	0.31183	0.912533	0.96631	0.378931	0.868723	0.600038
Cluster_Mitochondria	0.409296	1.00119	0.981118	0.0304161	0.682758	0.643501	0.774806	0.0900274	0.793457	0.00604001	0.0936706	0.0670985	0.168774	0.560987	0.00714425	1	0.611171	1	1	0.676586	0.979964	0.161631	0.526301	0.172191	0.907732	0.373974	0.128302	0.630167	0.0420926	0.94944	1	0.419343	1	1	1	1	0.0553253	0.919882	1	0.417124	0.998375	1.00119	1	0.0204012	0.443106	0.946632	0.905137	0.0334761	0.734188
Cluster_MitochondrialRPs	0.841493	1.00184	0.971031	0.0887024	0.00168962	0.938811	0.57465	0.752162	1	0.0263175	0.236584	0.528183	0.0881835	0.77947	0.633344	0.643034	0.0863547	1	1	0.0127209	0.712136	0.676986	0.793131	0.94276	0.496448	0.770424	0.905352	0.63568	0.00202447	0.0775467	1	0.871032	0.539652	1	0.465292	0.878119	0.138283	0.879163	1	0.161056	0.38608	1.00184	1	0.602417	0.649233	0.918898	0.427807	0.165099	0.102893
Cluster_MOT3	0.32143	1.0003	0.995248	1	0.711637	0.540576	1	0.600067	1	0.847088	1	0.397057	0.726106	0.721137	0.137595	1	1	1	1	0.708668	0.946476	1	0.629886	0.591104	0.757495	0.229397	0.548455	0.0896059	0.924563	0.387597	1	0.83044	1	1	0.096465	0.288965	1	0.979348	1	0.506884	0.866932	1.0003	1	1	0.815957	0.986388	0.964144	0.625496	1
Cluster_mRNAprocessing	0.696437	1.00289	0.954941	0.588349	0.112131	0.972196	0.477937	0.97061	0.999987	0.976963	0.0157973	0.210414	0.329819	0.076012	0.615783	0.664208	0.730007	1	1	0.106802	0.90169	0.253012	0.891894	0.884892	0.879025	0.965741	0.847727	0.994939	0.685836	0.37339	1	0.843757	0.339072	1	0.62539	0.399746	0.828862	0.817107	1	0.00019501	0.61617	1.00289	1	1	0.419666	0.875768	0.991292	0.00362397	0.0147813
Cluster_MSN2	0.767942	1.00055	0.991304	0.660839	0.340027	0.291972	0.858944	0.711075	1	0.344964	1	0.838826	0.0448639	0.360964	0.000882779	1	1	1	0.0173233	0.335441	0.904057	1	0.960031	0.644813	0.914253	0.062932	0.0461306	0.247356	0.148504	0.175899	1	0.815074	1	1	0.169724	1	1	0.96246	1	0.0230442	0.853422	1.00055	1	1	0.688709	0.975184	0.822636	0.640211	1
Cluster_MSN4	0.942069	1.00035	0.994458	0.779667	0.765625	0.706735	0.712418	0.690302	1	0.985765	1	0.236986	0.779287	0.828216	0.816473	1	0.111798	1	1	0.762807	0.937837	1	0.0538514	0.714516	0.723224	0.90503	0.768996	0.471194	0.950969	0.330952	1	0.87386	1	1	1	0.328259	0.584288	0.975947	1	0.381166	0.448468	1.00035	1	1	0.788756	0.984137	0.362008	0.937021	0.789355
Cluster_MSS11	0.179516	1.0006	0.990517	0.421428	0.916881	0.984245	1	0.301676	0.767451	0.495175	0.428393	0.00882401	0.0649281	0.487293	0.464061	1	0.651673	1	1	0.91516	0.994853	0.306688	0.912685	0.299595	0.90009	0.239122	0.951314	0.280867	0.848673	0.458744	1	0.0162546	1	1	1	1	0.777968	0.999233	1	0.387737	0.901438	1.0006	1	0.258406	0.665744	0.999669	0.785906	0.552263	0.439773
Cluster_MTH1	0.067321	1.0006	0.990517	0.421428	0.687057	0.221441	0.881958	0.925085	0.249008	0.495175	1	0.969363	0.708134	0.706012	0.251874	1	0.267582	1	1	0.390922	0.895803	1	0.350144	0.88864	0.90009	0.239122	0.409741	0.280867	0.084487	0.749184	1	0.627746	1	1	1	1	0.160204	0.959117	1	0.188835	0.75739	1.0006	1	1	0.665744	0.972958	0.175152	0.318389	0.0191253
Cluster_NDD1	0.282223	1.00094	0.985024	0.519867	0.275149	0.661579	1	0.56209	0.611809	0.373201	0.587583	0.410135	0.743385	0.781071	0.758918	0.680266	0.211219	1	1	0.481414	0.840085	0.440122	0.958655	0.861472	0.947939	0.939744	0.690649	0.822698	0.334137	0.211306	1	0.996381	0.328465	1	1	0.660506	0.673393	0.936034	1	0.0157153	0.417329	1.00094	1	1	0.525034	0.957515	0.750778	0.442201	0.542636
Cluster_NRG1	0.540938	1.00025	0.996038	0.251092	1	0.679453	0.589397	0.843022	0.295417	0.716225	0.207848	0.612401	0.660115	0.235708	0.22411	1	1	1	1	0.233865	0.955195	1	0.96418	0.76754	0.793388	0.14448	0.645679	0.365597	0.88394	0.842366	1	0.772077	1	1	1	0.247375	1	0.982761	1	0.650902	0.159353	1.00025	1	1	0.844095	0.988644	0.483967	0.408131	0.261613
Cluster_NuclearProteinTargetting	0.849178	1.00134	0.978782	0.260785	0.0513083	0.743771	0.663036	0.88576	0.864846	0.386729	0.34984	0.577611	0.43038	0.217647	0.966904	1	0.67564	1	0.0420027	0.90119	0.780617	1	0.733608	0.884145	0.65313	0.826123	0.901049	0.694111	0.483503	0.640957	1	0.557874	1	1	1	0.784647	0.0331368	0.910324	1	0.244715	0.554232	1.00134	1	0.0040513	0.773247	0.94016	0.495185	0.762808	0.649545
Cluster_PDR1	0.211225	1.00025	0.996038	0.660534	0.645218	0.679453	0.589397	0.843022	0.295417	0.716225	1	0.26969	0.660115	0.567283	0.97653	1	1	1	1	0.642177	0.955195	1	0.96418	0.76754	0.981348	0.8139	0.98577	0.0633203	0.571471	0.842366	1	0.772077	0.0994504	1	1	1	1	0.982761	1	0.650902	0.96066	1.00025	1	1	0.844095	0.988644	0.862013	0.408131	1
Cluster_PentosePhosphate	0.650693	1.0003	0.995248	0.726511	0.313121	0.818329	1	0.891613	0.3835	0.967463	1	0.938481	1	0.920887	0.91458	1	0.409759	1	1	0.708668	0.998787	1	0.629886	0.9769	0.972854	0.867055	0.548455	0.420796	0.924563	0.78562	1	1	1	1	1	1	1	0.999823	1	0.950092	0.866932	1.0003	1	1	0.815957	0.999924	0.810948	0.870705	0.343324
Cluster_Peroxisome	0.820716	1.0006	0.990517	0.708721	0.687057	0.660455	0.605796	0.536459	1	0.716311	1	0.709494	0.0649281	0.0341779	0.685567	1	0.267582	1	1	0.682717	0.895803	0.306688	0.912685	0.299595	0.90009	0.239122	0.951314	0.0798031	0.653216	0.749184	1	0.971267	0.222323	1	1	0.494482	0.777968	0.959117	1	0.387737	0.0526964	1.0006	1	1	0.665744	0.972958	0.175152	0.318389	0.930783
Cluster_PHD1	0.530115	1.00055	0.991304	0.148702	0.63853	0.527792	0.261723	0.982997	0.0169535	0.587315	0.401113	0.187775	0.0448639	0.800663	0.784648	1	0.619665	1	1	0.89579	0.995685	1	0.693467	0.837283	0.600945	0.648976	0.729994	0.632603	0.148504	0.985792	1	0.563274	1	1	1	1	1	0.96246	1	0.483013	0.436318	1.00055	1	1	0.688709	0.975184	0.822636	0.640211	0.676366
Cluster_PHO4	0.869257	1.00025	0.996038	0.251092	0.236653	0.333822	1	0.175796	1	0.992064	0.207848	0.612401	1	0.854304	0.22411	1	0.35554	1	1	1	0.955195	1	0.96418	0.436954	0.793388	0.14448	0.645679	1	0.88394	0.453935	1	0.772077	1	1	1	1	0.465776	0.982761	1	0.650902	0.455799	1.00025	1	1	0.844095	0.988644	0.862013	0.408131	0.671262
Cluster_Phospholipid	0.0566902	1.00104	0.98346	0.804483	0.781507	0.343187	0.689254	0.927794	1	0.256129	0.624315	0.71723	0.20942	0.950154	0.429545	1	0.842133	1	1	0.18096	0.824808	0.130238	0.77151	0.926808	0.933107	0.115245	0.0834177	0.0310175	0.0769743	0.38944	1	0.277866	1	1	1	1	0.726679	0.92954	1	0.628835	0.585587	1.00104	1	0.40743	0.490589	0.953147	0.856042	0.669121	0.627416
Cluster_Polyamine	1	1.00015	0.997621	0.47701	0.462978	1	1	1	0.119626	1	1	0.0513218	1	0.153975	0.894711	1	1	1	1	0.460221	0.999753	1	0.864313	1	0.994054	0.635352	0.85057	0.238929	1	0.622597	1	1	1	1	1	1	0.313497	0.989621	1	0.926943	1	1.00015	1	1	0.90331	0.993171	0.646993	0.703633	1
Cluster_Proline	0.111914	1.0002	0.99683	0.172103	0.563505	0.472074	0.509379	0.365022	1	0.509696	0.170056	0.844144	1	0.739495	0.355254	1	1	1	1	0.159341	0.963993	1	0.291946	0.635305	0.83098	0.32292	0.326795	0.305142	0.126392	0.531621	1	0.693631	1	1	0.0653878	1	0.0707807	0.986185	1	0.799382	0.651298	1.0002	1	1	0.873201	0.990905	0.559576	0.167071	1
Cluster_Proteasome	0.836041	1.00149	0.97645	0.36247	0.998014	0.819456	0.888181	0.998484	0.913935	0.372074	0.045676	0.300973	0.540414	0.585586	0.549723	0.834854	0.731126	1	1	0.678836	0.759412	1	0.969655	0.900159	0.847568	0.795736	0.908554	0.748629	0.0649418	0.343	1	0.91422	0.466819	1	1	1	0.883742	0.900863	1	0.00079382	0.612644	1.00149	1	1	0.361467	0.933731	0.899392	0.100814	0.0250532
Cluster_Purine	0.456239	1.00079	0.987375	0.626839	0.06211	0.323415	0.105293	0.009047	1	0.21001	0.16336	0.900701	0.00577429	0.167629	0.30044	0.0624813	0.394594	1	1	0.962734	0.863529	1	0.737515	0.0634457	0.476721	0.498848	0.652095	0.411485	0.311585	0.579236	1	0.817549	1	1	0.23706	0.597337	1	0.945859	1	0.921986	0.982904	1.00079	1	1	0.581281	0.964104	0.0979744	0.259497	0.0262399
Cluster_PUT3	1	1.00079	0	0.846916	0.06211	0.00026776	0.0342494	0.009047	0.465005	0	0.16336	0	0.0722391	0	0	0.238182	0.0400183	1	1	0.0602007	0	0.0819735	0	0	0	0.05711	0	0.411485	0.0227787	0	1	0.0310509	1	1	1	0.00988311	0.578061	0	1	0	0.173651	1.00079	1	1	0	0	0	0	0.00686426
Cluster_PUT3	1	1.00079	0	0.846916	0.06211	0.00026776	0.0342494	0.009047	0.465005	0	0.16336	0	0.0722391	0	0	0.238182	0.0400183	1	1	0.0602007	0	0.0819735	0	0	0	0.05711	0	0.411485	0.0227787	0	1	0.0310509	1	1	1	0.00988311	0.578061	0	1	0	0.173651	1.00079	1	1	0	0	0	0	0.00686426
Cluster_Pyrimidine	0.265149	1.00079	0.987375	0.846916	0.164772	0.521205	0.49744	0.582847	0.465005	0.21001	1	0.208749	0.846467	0.517587	0.151517	1	0.394594	1	1	0.345104	0.863529	1	0.737515	0.836944	0.96676	0.498848	0.212655	0.766983	0.509822	0.298486	1	0.616442	1	1	1	0.597337	0.865581	0.945859	1	0.663129	0.856227	1.00079	1	1	0.581281	0.964104	0.0979744	0.259497	0.399721
Cluster_RAP1	0.609618	1.0006	0.990517	0.708721	0.395897	0.660455	0.881958	0.76928	1	0.495175	0.428393	0.112837	0.0649281	0.270728	0.251874	1	1	1	1	0.682717	0.895803	0.306688	0.0604255	0.88864	0.90009	0.897562	0.169962	1	0.084487	0.458744	1	0.627746	1	1	0.0165478	1	0.160204	0.959117	1	0.0658263	0.324993	1.0006	1	0.258406	0.665744	0.972958	0.785906	0.134152	0.0191253
Cluster_RCS1	0.738374	1.00035	0.994458	0.779667	0.387712	0.415957	0.712418	0.925164	0.46639	0.463688	1	0.51711	0.407021	0.578365	0.560574	1	1	1	1	0.124423	0.937837	0.192355	0.204377	0.714516	0.963121	0.90503	0.460238	0.471194	0.467563	0.930994	1	0.87386	1	1	1	0.0531999	0.584288	0.975947	1	0.136204	0.920524	1.00035	1	1	0.788756	0.984137	0.991725	0.216065	0.789355
Cluster_REB1	0.771547	1.00089	0.985807	0.890792	0.103433	0.557191	0.959465	0.161916	0.174582	0.441747	0.567893	0.340276	0.473461	0.0871731	0.99167	0.66048	0.79447	1	1	0.676722	0.847828	1	0.361584	0.299681	0.434539	0.997655	0.874726	0.0651925	0.271432	0.237524	0.0106626	0.303406	0.314237	1	1	0.640634	0.154141	0.939298	1	0.166827	0.512557	1.00089	1	1	0.543152	0.959707	0.7816	0.320313	0.726928
Cluster_RFX1	0.214978	1.0005	0.992092	0.606811	0.0250119	0.830785	0.214746	0.642108	1	0.433092	1	0.544417	0.884513	0.237222	0.446889	1	1	0.00297228	1	0.579785	0.912387	1	0.343252	0.537796	0.927737	0.826938	0.789992	1	0.0947979	0.206013	1	0.948073	1	1	1	1	1	0.965814	1	0.139821	0.135821	1.0005	1	1	0.712465	0.977415	0.85738	0.727739	0.891965
Cluster_RGM1	0.260515	1.0004	0.993669	0.822494	1	0.823568	1	0.948331	0.542226	0.961419	0.0482934	0.341089	0.479287	0.196901	0.888974	1	0.504903	1	1	0.454246	0.929276	1	0.605967	0.947429	0.690502	0.715128	0.894499	1	0.572047	0.901269	1	0.336452	1	1	1	1	0.63329	0.972558	1	0.551871	0.312938	1.0004	1	1	0.76246	0.981892	0.918405	0.153871	0.495139
Cluster_RGT1	0.456239	1.00079	0.987375	0.626839	1	0.854389	0.942113	0.371714	0.465005	0.592437	1	0.76918	0.846467	0.706037	0.490839	1	0.394594	1	1	0.345104	0.990863	0.0819735	0.985897	0.682552	0.96676	0.712937	0.929151	0.411485	0.311585	0.298486	1	0.616442	1	1	0.23706	0.597337	0.0324111	0.998619	1	0.132538	0.856227	1.00079	1	1	0.581281	0.999401	0.945789	0.454026	0.200075
Cluster_RIM101	0.992433	1.0006	0.990517	0.190466	0.687057	0.660455	0.881958	0.988262	0.767451	0.269859	1	0.479949	0.708134	0.989768	0.685567	0.513266	0.267582	1	1	0.168996	0.895803	1	0.350144	0.966988	0.57375	0.897562	0.409741	1	0.0254404	0.749184	1	0.627746	1	1	1	0.494482	0.421858	0.959117	1	0.80804	0.901438	1.0006	1	0.258406	0.665744	0.972958	0.503649	0.969324	0.930783
Cluster_RLM1	0.91297	1.0003	0.995248	0.726511	0.711637	0.0457972	0.656368	0.891613	0.0223022	0.265334	1	0.0293484	0.330161	0.721137	0.39714	0.0434304	0.409759	1	1	0.309718	0.946476	0.167323	0.318062	0.591104	0.757495	0.548121	0.548455	1	0.352762	0.78562	1	1	1	1	0.00401919	1	0.528741	0.979348	1	0.794921	0.61103	1.0003	1	1	0.984784	0.986388	0.41857	0.974414	0.73685
Cluster_RME1	0.869257	1.00025	0.996038	0.251092	1	0.989535	0.189307	0.491173	1	0.716225	1	0.26969	1	0.567283	0.845321	1	1	1	1	0.642177	0.955195	1	0.473974	0.76754	0.793388	1	0.645679	1	0.571471	0.453935	1	0.772077	1	1	1	1	1	0.982761	1	0.898368	0.781631	1.00025	1	1	0.844095	0.988644	0.483967	0.7481	0.261613
Cluster_RNAPol	0.836041	1.00149	0.97645	0.719649	0.501513	0.0905513	0.967268	0.456048	0.654052	0.239277	1	0.964686	0.987355	0.719298	0.27202	0.834854	0.468087	0.00889476	1	0.0895145	0.759412	1	0.653072	0.178759	0.955234	0.896408	0.224482	0.261876	0.344787	0.164955	1	0.91422	1	0.0828452	1	0.818448	0.478137	0.900863	1	0.00319028	0.846476	1.00149	1	0.526556	0.735878	0.933731	0.995449	0.100814	0.390119
Cluster_ROX1	1	1.00005	0.999207	1	1	1	1	0.309462	1	0.619817	1	1	1	0.536005	1	0.0582226	1	1	1	1	0.990875	1	1	0.466277	0.954771	1	0.7561	1	0.349931	0.853898	1	0.256001	1	1	1	1	1	0.996528	1	0.581928	0.476394	1.00005	1	1	0.966673	0.997719	0.864908	0.639357	1
Cluster_RPH1	0.312827	1.00069	0.988945	0.530415	0.0079817	0.121451	1	0.673203	1	0.74515	0.479286	0.425882	0.529655	0.705558	0.683499	0.568327	1	1	1	0.497302	0.879519	1	0.963883	0.950532	0.870077	0.36879	0.966345	0.347262	0.183364	0.663932	1	0.984102	1	0.039538	1	1	0.503937	0.952465	1	0.641341	0.957764	1.00069	1	1	0.922538	0.968521	0.417671	0.0721227	0.00037192
Cluster_RPs	0.743022	1.00439	0.932388	0.34407	0.379104	0.96103	0.925333	0.561556	0.438178	0.907359	0.0186031	0.875834	0.25182	0.000178953	0.931267	0.139886	0.996068	1	1	0.912965	0.8082	0.272356	0.0753305	0.627687	0.982094	0.982489	0.995839	0.502416	0.609993	0.35199	1	0.398829	1	1	0.0605681	0.723454	0.0506947	0.735879	1	0.0349001	0.00657119	1.00439	1	0.0214082	0.0503227	0.81757	0.869065	0.00503895	0.0957163
Cluster_rRNAprocessing	0.135159	1.00144	0.977227	0.187089	0.655012	0.859493	0.873785	0.997938	0.899688	0.577751	0.741338	0.0366095	0.504613	0.234054	0.116651	0.824629	0.091709	1	1	0.980412	0.766416	0.58751	0.300961	0.971021	0.620108	0.179232	0.130047	0.468107	0.592168	0.57924	1	0.473133	1	1	1	0.807815	0.97371	0.904006	1	0.897587	0.947156	1.00144	1	0.514599	0.373947	0.93587	0.646509	0.361616	0.533788
Cluster_RTG1	0.242658	1.00104	0.98346	0.387909	0.781507	0.343187	0.455059	0.999582	0.69449	0.421065	1	0.370451	0.603855	0.163106	0.429545	0.347933	0.537353	1	1	0.18096	0.984481	0.473301	0.0294694	0.842023	0.754734	0.391529	0.76496	0.274136	0.162036	0.63118	1	0.458904	0.356045	1	1	0.697016	0.229355	0.92954	1	0.289047	0.585587	1.00104	1	1	0.490589	0.953147	0.856042	0.669121	0.627416
Cluster_RTG3	0.91297	1.0003	0.995248	0.0152581	0.711637	0.540576	0.254543	1	1	0.847088	1	0.938481	0.330161	0.99003	0.39714	0.302298	1	1	1	0.0821581	0.946476	1	0.0968587	0.9769	0.757495	0.867055	0.186798	1	0.352762	0.387597	1	0.83044	1	1	1	0.288965	1	0.979348	1	0.206193	0.61103	1.0003	1	1	0.815957	0.986388	0.99603	0.625496	1
Cluster_RTS2	0.012476	1.0002	0	1	0.161398	0.128022	1	0.365022	1	0	0.0116834	0.0190691	0.171802	0.0825207	0.0775659	1	1	1	1	0	0	1	0.0558233	0.0472527	0	0.00664441	0.326795	1	0.0149861	0	1	1	1	1	1	1	1	0	1	0.114653	0.0514898	1.0002	1	1	0	0	0	0	0
Cluster_RTS2	0.012476	1.0002	0	1	0.161398	0.128022	1	0.365022	1	0	0.0116834	0.0190691	0.171802	0.0825207	0.0775659	1	1	1	1	0	0	1	0.0558233	0.0472527	0	0.00664441	0.326795	1	0.0149861	0	1	1	1	1	1	1	1	0	1	0.114653	0.0514898	1.0002	1	1	0	0	0	0	0
Cluster_SFL1	0.650693	1.0003	0.995248	0.726511	1	0.540576	0.656368	0.273386	1	0.585362	1	0.397057	0.330161	0.413428	0.39714	1	0.409759	1	1	1	0.946476	1	0.629886	0.282804	0.757495	0.867055	0.548455	1	0.117315	0.78562	1	0.83044	1	1	1	1	0.15095	0.979348	1	0.506884	0.866932	1.0003	1	1	0.815957	0.986388	0.41857	0.299448	0.343324
Cluster_SFP1	0.767942	1.00055	0.991304	0.148702	0.340027	0.898478	1	0.458198	0.197808	0.344964	0.0867247	0.389434	0.363029	0.0542345	0.978675	0.483158	1	1	1	0.634084	0.904057	0.285193	0.960031	0.409376	0.988416	0.866485	0.209925	0.632603	0.331474	0.507151	1	0.815074	1	1	1	0.464904	0.748292	0.96246	1	0.483013	0.436318	1.00055	1	0.239693	0.688709	0.975184	0.822636	0.832773	0.676366
Cluster_SIG1	0.862874	1.00065	0.989731	0.477256	0.932447	0.991927	1	0.817509	1	0.207793	1	0.343444	0.476515	0.0771693	0.0689423	0.541622	0.299888	1	1	0.445134	0.887624	1	0.673691	0.925182	0.547784	0.302933	0.604718	1	0.129278	0.706753	1	0.43588	1	1	1	1	0.804147	0.955785	1	0.72793	0.0318063	1.00065	1	1	0.643544	0.970737	0.151476	0.251933	0.250986
Cluster_SIP4	0.341763	1.00099	0.984242	0.0273129	0.155799	0.244686	0.860893	0.619367	0.25039	0.809963	1	0.916513	0.562549	0.365561	0.337898	0.326232	0.510685	1	1	0.746667	0.832412	0.456965	0.363693	0.642186	0.771722	0.337332	0.244067	0.838135	0.398685	0.187676	1	0.113814	1	1	0.0436381	0.67928	0.0775924	0.932781	1	0.834114	0.675773	1.00099	1	0.392471	0.50752	0.955329	0.226161	0.56153	0.930184
Cluster_SKN7	0.291277	1.00055	0.991304	0.907193	0.897729	0.527792	0.858944	0.0256778	0.72239	0.147444	1	0.389434	0.906941	0.360964	0.340285	1	0.619665	1	1	0.335441	0.995685	1	0.867878	0.203705	0.988416	0.062932	0.729994	1	0.148504	0.790589	1	0.563274	1	1	1	1	0.748292	0.96246	1	0.961315	0.954189	1.00055	1	0.239693	0.688709	0.975184	0.550692	0.640211	0.380819
Cluster_SKO1	0.942069	1.00035	0.994458	0.779667	1	0.415957	1	0.690302	0.46639	0.0351212	0.0373285	0.51711	0.138013	0.0896964	0.560574	1	0.111798	1	1	0.383836	0.937837	1	0.927904	0.714516	0.963121	0.90503	0.460238	0.118407	0.00898725	0.727471	1	0.569917	1	1	1	1	0.195461	0.975947	1	0.885231	0.920524	1.00035	1	1	0.788756	0.984137	0.362008	0.507907	0.789355
Cluster_SMP1	0.942069	1.00035	0.994458	1	1	0.156239	0.320066	0.925164	0.46639	0.747594	1	0.000977674	0.407021	0.0896964	0.274565	1	1	1	1	0.124423	0.937837	1	0.469643	0.426554	0.723224	0.639207	0.460238	0.471194	0.467563	0.930994	1	0.87386	1	1	1	0.328259	1	0.975947	1	0.381166	0.920524	1.00035	1	0.160012	0.788756	0.984137	0.943457	0.507907	0.789355
Cluster_SOK2	0.146221	1.00045	0.99288	1	0.845175	0.22835	0.445247	0.964327	0.610191	0.532618	1	0.210252	1	0.811722	0.00317194	1	0.171629	1	1	0.842777	0.920793	1	0.718057	0.968881	0.659258	0.00029599	0.0807166	0.559222	0.878884	0.867422	1	0.930195	1	1	1	1	1	0.969181	1	0.967538	0.697544	1.00045	1	0.200843	0.737039	0.979651	0.270774	0.80987	0.865031
Cluster_sphingolipids	0.540938	1.00025	0.996038	0.251092	0.645218	0.679453	1	0.843022	1	0.992064	0.207848	1	0.660115	0.567283	0.845321	1	0.35554	1	1	0.0475562	0.955195	1	0.794691	0.76754	0.793388	0.8139	0.902839	1	1	0.453935	1	1	1	1	1	1	0.465776	0.982761	1	0.306423	0.96066	1.00025	1	1	0.844095	0.988644	0.483967	0.408131	0.0574867
Cluster_SRD1	0.651414	1.00094	0.985024	0.147068	0.487733	0.809581	0.619819	0.747151	0.211304	0.373201	1	0.244219	0.518983	0.0614096	0.758918	0.0951719	0.811773	1	1	0.481414	0.840085	1	0.986888	0.732446	0.414868	0.985593	0.490257	0.822698	0.185212	0.70192	1	0.755989	1	1	0.274818	0.282946	0.391507	0.936034	1	0.423521	0.950611	1.00094	1	1	0.869269	0.957515	0.750778	0.12875	0.0666806
Cluster_STB1	0.942069	1.00035	0.994458	0.407571	0.126644	0.706735	0.712418	0.925164	0.000575258	0.185992	0.278353	0.51711	0.138013	0.578365	0.816473	1	1	1	1	0.762807	0.937837	0.192355	0.469643	0.912254	0.963121	0.90503	0.934969	0.0176028	0.76613	0.930994	1	0.256124	1	1	1	1	1	0.975947	1	0.976036	0.189644	1.00035	1	1	0.979164	0.984137	0.757945	0.782282	0.421822
Cluster_STE12	0.0888529	1.0004	0.993669	0.0511709	0.809507	0.589902	1	0.472217	1	0.639663	0.311218	0.86077	0.822144	0.712296	0.425508	0.381202	0.504903	1	1	0.172607	0.929276	1	0.958362	0.806729	0.690502	0.16868	0.693695	0.517209	0.572047	0.901269	1	0.647739	1	1	1	1	0.63329	0.972558	1	0.551871	0.822322	1.0004	1	0.180681	0.76246	0.981892	0.704458	0.402649	0.201871
Cluster_Sterols	0.74007	1.00119	0.981118	0.872276	0.146616	0.321296	0.0828501	0.649563	0.418807	0.0596426	0.299025	0.249244	0.51101	0.91582	0.122664	0.763195	0.328414	1	1	0.676586	0.80241	1	0.902903	0.609296	0.70366	0.550483	0.634445	0.88757	0.00545209	0.297603	1	0.419343	1	1	1	1	0.311468	0.919882	1	0.0689859	0.784718	1.00119	1	1	0.443106	0.946632	0.352463	0.31755	0.537567
Cluster_STP1	0.527501	1.00069	0.988945	0.282337	0.25843	0.687518	0.917336	0.107501	1	0.547564	1	0.6427	0.0383498	0.142021	0.683499	1	0.707838	1	1	0.0014477	0.879519	1	0.182635	0.145369	0.522992	0.940523	0.759277	0.720429	0.359251	0.663932	1	0.735915	1	1	0.0223191	0.548829	0.82724	0.952465	1	0.430397	0.534206	1.00069	1	1	0.622083	0.968521	0.993129	0.390015	0.0432811
Cluster_STP2	0.384581	1.00074	0.988159	0.580385	0.304154	0.213015	0.930825	0.516868	0.411603	0.830992	0.147165	0.151832	0.57962	0.226297	0.586668	0.593478	1	1	1	0.954224	0.991957	1	0.927019	0.217686	0.854385	0.237038	0.94989	0.379726	0.244902	0.621271	1	0.779842	1	1	1	1	0.542044	0.949156	1	0.34856	0.241921	1.00074	1	1	0.601337	0.96631	0.958221	0.52947	0.600038
Cluster_SUM1	0.0351858	1.00065	0.989731	0.477256	0.450396	0.767061	0.358049	0.817509	1	0.409508	1	0.773595	0.939578	0.386802	0.970295	1	1	1	1	0.445134	0.887624	0.0565006	0.673691	0.80642	0.885338	0.921781	0.927774	0.0972835	0.886788	0.890618	1	0.685305	1	1	1	0.159143	0.191028	0.955785	1	0.520802	0.431059	1.00065	1	1	0.643544	0.970737	0.977464	0.467914	0.250986
Cluster_SWI4	0.402751	1.00104	0.98346	0.804483	0.781507	0.82127	0.97625	0.826509	0.0638875	0.598131	0.624315	0.112861	0.803871	0.981801	0.870687	0.716447	0.0945067	1	1	0.0787208	0.824808	1	0.882103	0.71234	0.933107	0.581378	0.884132	0.556254	0.463245	0.925531	1	0.144413	0.356045	1	1	1	0.229355	0.92954	1	0.156458	0.137645	1.00104	1	1	0.846135	0.953147	0.945817	0.810704	0.228652
Cluster_SWI5	0.151174	1.00069	0.988945	0.787537	0.10375	0.687518	0.917336	0.959274	1	0.157786	1	0.425882	0.951314	0.503506	0.996436	0.568327	0.707838	1	1	0.764015	0.879519	1	0.892127	0.950532	0.522992	0.940523	0.999727	0.347262	0.577103	0.371938	1	0.735915	0.00271578	1	0.210805	1	0.0731861	0.952465	1	0.923346	0.327911	1.00069	1	0.045201	0.622083	0.968521	0.708807	0.390015	1
Cluster_SWI6	0.862874	1.00065	0.989731	0.750806	0.932447	0.998629	0.901218	0.944644	0.805998	0.994921	0.454432	0.168528	0.939578	0.792995	0.999101	1	0.0898985	1	1	0.725913	0.887624	1	0.843619	0.80642	0.885338	0.987385	0.995216	0.693774	0.996305	0.969226	1	0.43588	1	1	1	0.522427	0.804147	0.955785	1	0.0443554	0.234079	1.00065	1	0.276659	0.643544	0.970737	0.74778	0.251933	0.0981394
Cluster_TFs	0.803593	1.0002	0.99683	0.578645	1	0.973946	1	0.772652	1	0.842893	1	0.475317	1	0.739495	0.950288	1	0.296343	1	1	1	0.963993	1	0.291946	0.918875	0.83098	1	0.952597	0.305142	0.821446	0.895525	1	1	0.0803829	1	1	1	1	0.986185	1	0.799382	0.924855	1.0002	1	1	0.873201	0.990905	0.559576	0.167071	0.00158104
Cluster_THI2	0.214978	1.0005	0.992092	0.606811	0.584257	0.628593	0.502872	0.975371	1	0.201313	1	0.544417	0.884513	0.468095	0.446889	0.111742	1	1	1	0.0242586	0.912387	0.263034	0.149981	0.98176	0.991286	0.577831	0.789992	1	0.248306	0.558685	1	0.769293	1	1	0.0115345	0.433596	0.333311	0.965814	1	0.338	0.786721	1.0005	1	1	0.712465	0.977415	0.85738	0.727739	0.62263
Cluster_Thiamine	0.409053	1.0002	0.99683	0.172103	0.161398	0.818737	0.509379	0.365022	1	0.842893	1	1	1	0.368338	0.0775659	1	1	1	1	0.560514	0.963993	1	0.666405	0.635305	0.83098	0.073174	0.326795	1	0.436898	0.531621	1	0.271875	1	1	1	1	1	0.986185	1	0.114653	0.651298	1.0002	1	1	0.873201	0.990905	0.559576	0.544119	0.589332
Cluster_tRNAprocessing	0.341763	1.00099	0.984242	0.345578	0.314933	0.589134	0.971617	0.789746	1	0.907493	0.606377	0.305875	0.34472	0.213317	0.192366	0.698899	0.82762	1	1	0.746667	0.832412	0.120121	0.363693	0.79262	0.771722	0.337332	0.101395	0.249821	0.881797	0.423974	1	0.609224	0.342399	1	1	0.67928	0.701022	0.932781	1	0.529952	0.331134	1.00099	1	1	0.857803	0.955329	0.719118	0.215247	0.0855698
Cluster_tRNAsynth	0.409296	1.00119	0.981118	0.512002	0.285479	0.0928338	0.565891	6.75093e-05	0.418807	0.721999	0.673377	0.396787	0.0771098	0.399414	0.528585	0.161239	0.137998	1	1	0.279317	0.80241	0.161631	0.957105	0.00116647	0.70366	0.550483	0.26852	0.630167	0.183003	0.873206	1	0.255711	1	1	0.333653	1	0.549616	0.919882	1	0.0689859	0.88546	1.00119	1	0.450137	0.443106	0.946632	0.352463	0.0334761	0.734188
Cluster_Tryptophan	0.443265	1.0005	0.992092	0.606811	0.584257	0.377725	0.831446	0.000187126	0.670149	0.059653	1	0.122733	0.606195	0.994204	0.962324	1	1	1	1	0.579785	0.912387	0.263034	0.343252	0.00603609	0.629428	0.826938	0.982568	1	0.0947979	0.558685	1	0.238266	1	1	0.0115345	0.433596	0.714652	0.965814	0.00297228	0.587198	0.786721	1.0005	1	1	0.712465	0.977415	0.234178	0.0757462	0.320568
Cluster_UGA3	0.896039	1.00069	0.988945	0.282337	0.50275	0.940071	1	0.994406	1	0.547564	0.479286	0.6427	0.117429	0.705558	0.277914	1	1	1	1	0.0314709	0.879519	0.064638	0.563536	0.950532	0.522992	0.184391	0.110004	0.347262	0.0751929	0.371938	1	0.122458	1	1	1	0.548829	0.82724	0.952465	1	0.923346	0.87793	1.00069	1	1	0.622083	0.968521	0.968761	0.0721227	0.800844
Cluster_USV1	0.371107	1.0006	0.990517	0.421428	0.395897	0.984245	0.605796	0.301676	1	0.957682	0.10103	0.112837	0.708134	0.706012	0.251874	1	0.651673	1	1	0.390922	0.895803	1	0.778262	0.519156	0.985068	0.239122	0.667612	0.280867	0.416442	0.749184	1	0.627746	1	1	0.183649	0.139539	0.777968	0.959117	1	0.80804	0.901438	1.0006	1	1	0.665744	0.972958	0.503649	0.134152	0.930783
Cluster_Vacuole	0.598806	1.00244	0.961806	0.349898	0.836338	0.794743	0.919328	0.9292	0.99676	0.178799	0.0710357	0.0167423	0.0790135	0.0356798	0.428483	0.78721	0.395818	1	1	0.0583021	0.637804	0.0591703	0.535847	0.894254	0.616997	0.211194	0.32262	0.424558	0.056215	0.717795	1	0.956715	0.0810557	1	1	0.761702	0.93895	0.843155	1	0.284432	0.988452	1.00244	1	0.705319	0.189597	0.894004	0.500697	0.00560273	0.163743
Cluster_YAP1	0.35195	1.00045	0.99288	0.856998	0.524164	0.974314	1	0.820364	0.610191	0.773468	1	0.711205	0.246325	0.588013	0.568079	0.0928635	1	1	1	0.842777	0.920793	1	0.895765	0.872346	0.659258	0.777117	0.955706	1	0.662611	0.24128	1	0.713909	1	1	1	0.400458	1	0.969181	1	0.967538	0.442067	1.00045	1	0.200843	0.737039	0.979651	0.270774	0.312918	0.0193368
Cluster_YAP5	0.540938	1.00025	0.996038	1	1	0.679453	1	1	1	0.992064	1	0.0670066	0.660115	0.235708	0.845321	1	0.35554	1	1	0.642177	0.955195	1	0.170593	0.956709	0.793388	0.8139	0.902839	0.365597	0.88394	0.842366	1	0.772077	1	1	1	1	1	0.982761	1	0.650902	0.455799	1.00025	1	1	0.844095	0.988644	0.862013	0.7481	1
Cluster_YAP6	0.564889	1.00194	0.969487	0.655889	0.180454	0.727164	0.899442	0.997713	0.117138	0.334845	0.2613	0.364839	0.654744	0.425698	0.103684	1	0.96761	0.0115503	1	0.00802681	0.699175	0.328249	0.430637	0.985342	0.74186	0.198733	0.128031	0.864688	0.263624	0.485955	1	0.558808	0.193438	1	1	0.642695	0.493007	0.873058	1	0.528777	0.383162	1.00194	1	0.249054	0.266292	0.914703	0.208626	0.115415	0.0346593
Cluster_YFL044C
Cluster_YJL206C
Cluster_ZAP1	0.869257	1.00025	0.996038	0.251092	0.645218	0.0765717	0.589397	0.843022	0.295417	0.716225	0.207848	0.612401	0.250689	0.854304	0.551971	1	1	1	1	1	0.955195	1	0.96418	0.0220278	0.793388	0.441879	0.645679	1	0.235038	0.453935	1	0.772077	1	1	1	1	1	0.982761	1	0.650902	0.455799	1.00025	1	1	0.844095	0.988644	0.980087	0.408131	0.671262
Cluster_ZMS1	0.806475	1.0004	0.993669	0.479878	0.175498	0.823568	0.128123	0.948331	0.0719258	0.639663	1	0.97572	0.479287	0.978018	0.888974	0.381202	1	1	1	0.806887	0.929276	1	0.995143	0.993423	0.952279	0.932159	0.894499	0.517209	0.572047	0.669538	1	0.122245	1	1	1	1	1	0.972558	1	0.278743	0.312938	1.0004	1	1	0.76246	0.981892	0.704458	0.402649	1
Node 1	0.540938	1.00025	0.996038	0.660534	0.0485147	0.0765717	0.189307	0.175796	0.295417	0.927338	1	0.90208	0.660115	0.567283	0.97653	0.259154	1	1	1	0.642177	0.955195	1	0.473974	0.148152	0.793388	1	0.902839	0.0633203	0.571471	0.453935	1	0.772077	1	1	1	1	1	0.982761	1	1	0.96066	1.00025	1	1	0.844095	0.988644	0.483967	0.7481	0.671262
Node 10	0.858286	1.00045	0.99288	0.856998	0.845175	0.478072	0.798588	0.820364	1	0.532618	0.342589	0.210252	1	0.811722	0.568079	0.0928635	0.546563	1	1	0.519767	0.920793	1	0.718057	0.872346	0.659258	0.498167	0.617776	0.559222	0.0534981	0.613	1	0.930195	1	1	1	1	1	0.969181	1	0.0570955	0.442067	1.00045	1	1	0.737039	0.979651	0.270774	0.58211	0.260362
Node 11	1	1.0002	0.99683	1	0.563505	0.472074	0.509379	0.772652	1	0.509696	1	0.475317	0.57823	0.739495	0.727981	1	1	1	1	0.560514	0.963993	1	0.666405	0.918875	0.83098	0.739496	0.748543	1	0.821446	0.531621	1	0.693631	1	1	1	1	1	0.986185	1	0.969463	0.651298	1.0002	1	1	0.873201	0.990905	0.559576	0.544119	1
Node 12	0.704958	1.00015	0.997621	1	1	0.645406	1	0.670745	0.119626	0.238096	1	1	1	0.900123	0.894711	1	1	1	1	0.460221	0.972872	1	0.864313	0.847983	0.870351	1	0.985498	1	0.281645	0.622597	1	0.588192	1	1	1	0.15676	0.0383704	0.989621	1	0.197043	0.856466	1.00015	1	0.071998	0.90331	0.993171	0.950194	0.953106	0.48699
Node 13	0.431489	1.00035	0.994458	0.407571	0.126644	0.415957	1	0.690302	0.46639	0.463688	1	0.0713257	0.407021	0.578365	0.953822	1	1	1	1	0.762807	0.937837	1	0.927904	0.714516	0.723224	0.639207	0.768996	0.471194	0.76613	0.727471	1	0.569917	1	1	1	0.328259	1	0.975947	1	0.885231	0.732951	1.00035	1	1	0.788756	0.984137	0.757945	0.507907	1
Node 14	0.456239	1.00079	0.987375	0.00581203	0.164772	0.854389	0.49744	0.913826	1	0.000472754	1	0.379876	0.184325	0.517587	0.682497	0.617164	1	1	1	0.160984	0.863529	0.386402	0.737515	0.995393	0.476721	0.877695	0.427167	0.766983	0.00616679	0.928047	1	0.616442	0.284871	1	1	0.597337	0.578061	0.945859	1	0.663129	0.522675	1.00079	1	0.328771	0.581281	0.964104	0.343031	0.454026	0.646265
Node 15	0.70308	1.0005	0.992092	0.029144	0.283793	0.998261	0.502872	0.375777	1	0.059653	0.372532	0.544417	0.304461	0.880915	0.689269	1	1	1	1	0.871999	0.912387	1	0.934898	0.767294	0.629428	0.577831	0.928845	0.0495556	0.0947979	0.830259	1	0.948073	0.189032	1	1	0.433596	0.714652	0.965814	1	0.930604	0.786721	1.0005	1	0.22051	0.712465	0.977415	0.600136	0.239158	0.62263
Node 16	0.5568	1.0001	0.998414	1	1	0.357825	1	0.523168	0.0465743	1	1	0.138114	1	0.784721	0.278531	1	0.16115	1	1	1	0.981832	1	0.735933	0.217401	0.911585	0.489583	0.571678	1	1	0.729136	1	0.446475	1	1	1	1	1	0.993069	1	0.825228	1	1.0001	1	1	0.934456	0.995443	0.74806	0.408766	1
Node 17	0.5568	1.0001	0.998414	0.350866	1	0.357825	1	0.0957564	1	0.855473	1	1	1	0.784721	0.777013	1	0.16115	1	1	1	0.981832	1	1	0.217401	0.911585	0.489583	0.571678	1	1	0.729136	1	0.065527	1	1	1	1	1	0.993069	1	0.338628	1	1.0001	1	1	0.998891	0.995443	0.74806	0.408766	0.359151
Node 18
Node 19	1	1.00005	0.999207	1	1	1	1	1	1	1	1	0.371652	1	0.536005	0.527772	1	1	1	0.00158699	1	0.990875	1	0.486114	1	0.954771	1	0.7561	1	1	0.853898	1	1	1	1	1	1	1	0.996528	1	0.581928	0.476394	1.00005	1	1	0.966673	0.997719	0.864908	0.639357	0.199464
Node 2	0.905482	1.00109	0.982679	0.991399	0.100857	0.617728	0.135881	0.0180651	0.0820772	0.012253	0.264763	0.76719	0.64269	0.551556	0.107699	0.732974	0.563	1	1	0.389327	0.817274	1	0.914572	0.0120065	0.737702	0.275358	0.34743	0.118728	0.00574261	0.790119	1	0.324206	0.369408	1	1	1	0.256207	0.92631	1	0.92244	0.495353	1.00109	1	0.422022	0.474222	0.950971	0.833202	0.94104	0.844222
Node 2_fuzzy0.06	0.666656	1.00159	0.974899	0.962762	0.129128	0.595782	0.258732	0.000225938	0.133615	0.275378	0.431348	0.550881	0.608302	0.721697	0.177626	0.853552	0.763464	1	1	0.561451	0.745595	1	0.86043	0.00104251	0.82531	0.733511	0.624842	0.301949	0.111597	0.82303	1	0.437497	0.488728	1	0.418048	0.837983	0.168195	0.894609	1	0.966029	0.212107	1.00159	1	0.549596	0.33774	0.92947	0.561604	0.96408	0.637142
Node 20	0.334259	1.00005	0.999207	1	1	0.598195	1	1	1	0.619817	1	1	1	0.536005	0.527772	1	1	1	1	1	0.990875	1	0.486114	1	1	0.285558	0.7561	1	1	0.853898	1	1	1	1	1	1	1	0.996528	1	0.581928	1	1.00005	1	1	0.966673	0.997719	0.864908	0.639357	1
Node 21	0.5568	1.0001	0.998414	1	1	0.357825	1	1	1	0.384162	1	1	1	0.784721	0.278531	1	1	1	1	1	0.981832	1	0.735933	1	0.997956	0.489583	0.571678	1	0.577421	0.729136	1	1	1	1	1	1	1	0.993069	1	0.338628	0.725849	1.0001	1	1	0.934456	0.995443	0.74806	0.869948	1
Node 22	1	1.00005	0.999207	1	0.187165	1	1	0.309462	1	0.619817	1	0.371652	1	1	1	1	1	1	1	1	0.990875	1	1	0.466277	0.954771	1	0.7561	0.0869867	1	0.853898	1	1	1	1	1	1	1	0.996528	1	0.581928	0.476394	1.00005	1	1	0.966673	0.997719	0.864908	1	1
Node 23
Node 24
Node 25	0.334259	1.00005	0.999207	1	1	1	0.163063	1	1	0.619817	1	1	1	0.536005	0.527772	1	0.0841103	1	1	1	0.990875	1	0.486114	1	0.954771	0.285558	0.7561	1	1	0.853898	1	1	1	1	1	1	1	0.996528	1	1	1	1.00005	1	1	0.966673	0.997719	0.864908	0.639357	0.199464
Node 26	0.334259	1.00005	0.999207	0.194307	1	1	1	1	1	0.619817	1	0.371652	0.194108	1	1	1	0.0841103	1	1	0.185777	0.990875	1	0.486114	1	0.954771	1	1	0.0869867	1	0.853898	1	1	1	1	1	1	0.117834	0.996528	1	1	1	1.00005	1	1	0.966673	0.997719	0.864908	0.639357	1
Node 27	1	1.00005	0.999207	1	1	1	1	1	1	1	1	0.371652	1	0.536005	1	1	1	1	1	1	0.990875	1	0.486114	1	0.954771	1	0.7561	1	1	1	1	1	1	1	1	1	1	0.996528	1	1	0.476394	1.00005	1	1	0.966673	0.997719	0.864908	0.639357	1
Node 28	0.704958	1.00015	0.997621	1	1	0.214035	1	0.228016	1	0.945062	1	0.751937	1	0.553916	1	1	1	1	1	0.460221	0.999753	1	0.114854	0.449489	0.870351	1	0.85057	0.238929	1	0.622597	1	1	1	1	1	1	0.313497	0.989621	1	0.621798	0.856466	1.00015	1	0.071998	0.90331	0.993171	0.950194	0.703633	0.48699
Node 29
Node 3	0.869257	1.00025	0.996038	1	0.236653	0.333822	0.589397	1	1	0.927338	1	0.90208	0.660115	0.854304	0.551971	0.259154	1	1	1	0.00506473	0.955195	1	0.96418	1	0.793388	0.441879	0.645679	1	0.88394	0.453935	1	0.379845	1	1	1	1	0.465776	0.982761	1	0.898368	0.781631	1.00025	1	0.117099	0.989628	0.988644	0.483967	0.408131	0.0574867
Node 30	0.803593	1.0002	0.99683	0.578645	1	1	0.126955	1	1	0.147563	0.0116834	0.475317	0.57823	0.739495	0.727981	1	0.296343	1	1	0.560514	0.963993	1	1	0.918875	0.83098	0.739496	0.952597	1	0.126392	0.531621	1	1	1	1	1	1	1	0.986185	1	0.969463	1	1.0002	1	1	0.873201	0.990905	0.559576	0.167071	0.0269815
Node 31	0.312827	1.00069	0.988945	0.117834	0.767976	0.0386115	0.691682	0.446802	0.838742	0.157786	0.479286	0.10353	0.00980146	0.299274	0.683499	1	0.331945	1	1	0.101127	0.879519	0.347759	0.756306	0.300487	0.522992	0.809326	0.759277	0.347262	0.183364	0.371938	1	0.043122	1	1	0.210805	0.179208	0.82724	0.952465	1	0.641341	0.87793	1.00069	1	1	0.622083	0.968521	0.708807	0.1967	0.128616
Node 32	0.525633	1.00084	0.986591	0.427225	0.642223	0.441728	0.790965	0.0159329	0.516546	0.16353	0.547264	0.137209	0.221967	0.427796	0.230103	1	0.42491	1	1	0.636743	0.855643	0.404857	0.274442	0.0123171	0.455142	0.35211	0.783757	0.787269	0.38095	0.538213	1	0.449084	1	1	0.0322761	1	0.611953	0.942573	1	0.879831	0.612497	1.00084	1	1	0.561894	0.961903	0.980205	0.883064	0.880856
Node 33	1	1.00005	0.999207	1	1	0.598195	1	1	0	0.619817	1	1	1	1	0.527772	1	0.0841103	1	1	0.185777	0.990875	1	1	0.466277	0.954771	0.285558	0.7561	1	0.349931	0.853898	1	1	1	1	1	0.055247	1	0.996528	1	0.581928	0.476394	1.00005	1	1	0.966673	0.997719	0.864908	0.639357	0.199464
Node 34	1	1.0001	0.998414	1	1	0.357825	1	0.523168	1	0.384162	1	1	1	1	0.278531	1	0.16115	1	1	0.337048	0.981832	1	0.735933	0.715152	0.911585	0.489583	0.571678	1	1	0.729136	1	0.065527	1	1	1	1	0.221788	0.993069	1	0.338628	0.725849	1.0001	1	1	0.934456	0.995443	0.74806	0.869948	1
Node 35	0.899815	1.00334	0.948122	0.141445	0.491897	0.741532	0.785254	0.718993	0.00101181	0.158296	0.593755	0.122693	0.140491	0.723534	0.584298	0.552644	0.674394	1	1	0.359361	0.875151	0.870991	0.693363	0.377864	0.81431	0.452784	0.637363	0.703489	0.0209207	0.827898	1	0.345668	0.754838	0.175777	0.10244	0.311245	0.81648	0.791852	1	0.0845887	0.635119	1.00334	1	0.227805	0.341142	0.857896	0.812769	0.0229332	0.167568
Node 36
Node 37	0.5568	1.0001	0.998414	1	1	0.838565	1	0.523168	1	0.855473	1	1	0.350546	0.287289	0.777013	1	1	1	1	1	0.981832	1	1	0.715152	0.911585	1	0.571678	1	0.577421	0.729136	1	1	1	1	1	1	1	0.993069	1	0.825228	0.725849	1.0001	1	1	0.934456	0.995443	0.74806	0.869948	1
Node 38	1	1.00005	0.999207	1	1	1	1	0.309462	1	0.619817	1	1	1	0.536005	1	1	1	1	1	1	0.990875	1	0.486114	0.466277	0.954771	1	0.7561	1	1	0.853898	1	1	1	1	1	1	1	0.996528	1	1	0.476394	1.00005	1	1	0.966673	0.997719	0.864908	0.639357	0.199464
Node 39	0.0933029	1.00099	0.984242	0.775949	1	0.409363	0.21733	0.132737	0.25039	0.0243054	0.230503	0.813227	0.176843	0.54131	0.192366	1	0.82762	1	1	0.151749	0.985875	1	0.538622	0.164773	0.396086	0.337332	0.641777	0.249821	0.019497	0.666632	1	0.407179	1	1	1	0.303806	0.203266	0.932781	1	0.699866	0.091331	1.00099	1	1	0.50752	0.955329	0.877417	0.934791	0.586296
Node 4
Node 40	1	1.00005	0.999207	0.194307	1	0.598195	1	0.309462	1	1	1	0.371652	1	0.536005	0.527772	1	1	1	1	1	0.990875	1	0.486114	0.466277	0.954771	0.285558	0.7561	1	1	0.853898	1	1	1	1	1	1	1	0.996528	1	0.581928	1	1.00005	1	1	0.966673	0.997719	0.864908	0.639357	0.199464
Node 41	1	1.0001	0.998414	1	0.339307	0.838565	1	1	1	0.384162	1	0.138114	0.350546	1	0.278531	1	1	1	1	1	0.981832	1	0.236294	0.715152	0.911585	0.489583	0.571678	1	0.577421	0.729136	1	1	1	1	1	0.107444	1	0.993069	1	0.825228	0.226938	1.0001	1	1	0.998891	0.995443	0.981756	0.408766	0.359151
Node 42	1	1.0001	0.998414	1	1	0.357825	1	0.0957564	1	0.384162	0.0889828	1	0.350546	0.784721	0.777013	1	1	1	1	0.337048	0.981832	1	0.236294	0.217401	0.911585	0.489583	0.940522	1	1	0.729136	1	1	1	1	1	1	1	0.993069	1	0.825228	0.725849	1.0001	1	1	0.934456	0.995443	0.74806	0.408766	0.0397781
Node 43	0.704958	1.00015	0.997621	1	0.462978	0.645406	0.413773	0.670745	0.119626	0.676294	0.130463	1	1	0.553916	0.541618	0.164703	0.231713	1	1	0.460221	0.972872	1	0.479175	0.449489	0.870351	0.198047	0.432232	1	0.725309	0.622597	1	1	1	1	1	1	1	0.989621	1	0.621798	0.1081	1.00015	1	1	0.90331	0.993171	0.646993	0.703633	0.48699
Node 44	0.979157	1.00179	0.971803	0.399853	0.0264939	0.914065	0.370451	0.582611	0.528091	0.00141687	0.224384	0.738629	0.253679	0.825239	0.933709	0.884841	0.59329	1	1	0.116575	0.957398	1	0.252244	0.864343	0.18868	0.739276	0.46998	0.199945	0.000106386	0.086685	0.0212209	0.0256318	1	1	1	1	0.626839	0.882231	1	0.69019	0.584778	1.00179	1	0.592372	0.661454	0.921003	0.453318	0.0560648	0.0873607
Node 45
Node 46	1	1.00005	0.999207	1	1	1	1	1	1	0.619817	1	1	1	0.536005	0.527772	1	1	1	1	0.185777	0.990875	1	0.486114	1	0.954771	1	0.7561	1	1	0.853898	1	1	1	1	1	1	1	0.996528	1	0.581928	0.476394	1.00005	1	1	0.966673	0.997719	0.864908	1	1
Node 47
Node 48	0.334259	1.00005	0.999207	0.194307	1	1	1	1	1	0.619817	1	1	0.194108	0.536005	0.527772	1	1	1	1	1	0.990875	1	0.486114	1	0.954771	0.285558	0.7561	1	1	0.853898	1	0.256001	1	1	1	1	1	0.996528	1	1	0.476394	1.00005	1	1	0.966673	0.997719	0.864908	1	1
Node 49	0.5568	1.0001	0.998414	1	0.339307	0.838565	1	1	1	0.384162	1	1	0.350546	0.784721	0.777013	1	0.16115	1	1	1	0.981832	1	0.735933	0.715152	0.911585	1	0.571678	1	0.577421	0.97866	1	0.446475	1	1	1	1	1	0.993069	1	1	0.725849	1.0001	1	1	0.934456	0.995443	0.981756	1	1
Node 5	0.260483	1.00015	0.997621	0.47701	1	0.645406	1	0.228016	0.119626	0.238096	1	0.311698	1	0.900123	0.541618	1	0.231713	1	1	1	0.972872	1	0.479175	0.101358	0.870351	1	0.85057	0.238929	0.725309	0.942213	1	0.588192	1	1	1	1	1	0.989621	1	0.197043	0.856466	1.00015	1	1	0.90331	0.993171	0.646993	0.261333	0.103472
Node 50
Node 51	0.334259	1.00005	0.999207	1	1	1	1	1	1	0.619817	1	1	1	0.536005	1	0.0582226	1	1	1	1	0.990875	1	1	1	0.954771	1	1	1	0.349931	0.853898	1	0.256001	1	1	1	1	0.117834	0.996528	1	0.581928	0.476394	1.00005	1	1	0.966673	0.997719	0.864908	0.639357	1
Node 52	0.334259	1.00005	0.999207	1	1	0.598195	1	1	1	1	1	1	1	0.536005	1	1	0.0841103	1	1	1	0.990875	1	0.486114	0.466277	0.954771	1	1	1	1	0.853898	1	0.256001	1	1	1	1	1	0.996528	1	1	0.476394	1.00005	1	1	0.966673	0.997719	0.864908	0.639357	1
Node 53
Node 54
Node 55	0.803593	1.0002	0.99683	1	0.563505	0.472074	1	1	0.20556	0.509696	1	0.14808	0.171802	0.739495	0.727981	1	1	1	1	0.159341	0.963993	0.114911	0.291946	1	0.83098	0.32292	0.952597	0.305142	0.436898	0.531621	1	1	1	1	0.0653878	1	1	0.986185	1	0.969463	0.651298	1.0002	1	1	0.993637	0.990905	0.559576	0.167071	0.589332
Node 56	0.803593	1.0002	0.99683	1	0.563505	0.472074	1	1	0.20556	0.509696	1	0.14808	0.171802	0.739495	0.727981	1	1	1	1	0.159341	0.963993	0.114911	0.291946	1	0.83098	0.32292	0.952597	0.305142	0.436898	0.531621	1	1	1	1	0.0653878	1	1	0.986185	1	0.969463	0.651298	1.0002	1	1	0.993637	0.990905	0.559576	0.167071	0.589332
Node 57	1	1.00015	0.997621	0.47701	1	0.214035	0.0710833	0.670745	0.119626	0.945062	1	0.751937	0.476623	0.900123	0.541618	1	1	1	1	0.460221	0.972872	1	0.864313	0.449489	0.870351	0.198047	0.432232	0.238929	1	0.942213	1	1	1	1	1	1	1	0.989621	1	0.926943	0.464615	1.00015	1	1	0.90331	0.993171	0.646993	0.953106	1
Node 58	0.803593	1.0002	0.99683	0.578645	1	0.472074	0.509379	0.772652	1	0.509696	1	1	1	0.739495	0.727981	0.0187821	1	1	1	0.560514	0.963993	1	0.666405	0.918875	0.83098	0.739496	0.952597	1	0.436898	0.531621	1	0.0542066	1	1	1	1	1	0.986185	1	0.799382	0.651298	1.0002	1	1	0.873201	0.990905	0.559576	0.167071	1
Node 59	0.111914	1.0002	0.99683	1	1	0.472074	0.015212	0.0910101	1	0.509696	1	0.844144	1	1	0.727981	0.213344	1	1	1	1	0.963993	1	0.930282	0.263673	0.83098	0.32292	0.748543	1	0.436898	0.895525	1	0.0542066	1	1	1	1	0.394402	0.986185	1	0.444215	0.651298	1.0002	1	1	0.873201	0.990905	0.559576	0.167071	1
Node 6	0.431489	1.00035	0.994458	0.407571	0.387712	0.415957	1	1	1	0.747594	1	0.801258	0.407021	0.957955	0.274565	1	0.111798	1	1	1	0.937837	1	0.750069	0.912254	0.723224	0.0231992	0.141224	0.471194	0.76613	0.727471	1	1	1	1	1	0.328259	0.584288	0.975947	1	0.674508	0.448468	1.00035	1	1	0.788756	0.984137	0.362008	0.782282	0.421822
Node 60	1	1.0001	0.998414	1	0.0350233	0.357825	1	0.523168	1	0.855473	1	0.605191	1	0.287289	0.777013	1	1	1	1	0.337048	0.981832	1	0.735933	0.715152	0.911585	1	0.571678	1	0.577421	0.729136	1	0.446475	1	1	1	1	1	0.993069	1	0.338628	0.226938	1.0001	1	1	0.934456	0.995443	0.74806	0.869948	1
Node 61	0.111718	1.0001	0.998414	1	1	1	0.0265827	1	1	0.384162	1	1	1	0.784721	0.777013	1	1	1	1	0.337048	0.981832	1	1	1	0.911585	1	0.940522	1	0.12244	0.729136	1	1	0.0410313	1	1	1	1	0.993069	1	0.825228	0.226938	1.0001	1	1	0.934456	0.995443	0.74806	0.408766	1
Node 62	0.704958	1.00015	0.997621	1	0.462978	0.935144	0.413773	0.670745	1	0.676294	1	0.751937	0.476623	0.900123	0.894711	1	0.231713	1	1	0.460221	0.972872	1	0.479175	0.847983	0.870351	1	0.985498	1	0.725309	0.622597	1	0.163041	1	1	1	1	1	0.989621	1	0.197043	0.856466	1.00015	1	1	0.90331	0.993171	0.646993	0.703633	1
Node 63	0.650693	1.0003	0.995248	1	1	0.995796	0.254543	1	1	0.585362	1	0.938481	1	0.721137	0.137595	1	1	1	1	0.309718	0.946476	1	0.629886	0.9769	0.757495	0.059564	0.548455	0.420796	0.352762	0.78562	1	0.83044	1	1	1	1	0.15095	0.979348	1	0.506884	0.61103	1.0003	1	1	0.815957	0.986388	0.41857	0.625496	0.343324
Node 64
Node 65	1	1.0002	0.99683	0.578645	0.563505	0.973946	1	0.772652	1	0.842893	1	0.475317	1	0.368338	0.727981	1	0.296343	1	1	1	0.963993	1	0.666405	0.918875	0.83098	0.32292	0.748543	1	0.821446	0.531621	1	0.271875	1	1	1	1	0.0707807	0.986185	1	0.444215	0.277931	1.0002	1	1	0.873201	0.990905	0.909243	0.544119	0.589332
Node 66	1	1.00005	0.999207	1	1	1	0.163063	0.309462	1	0.619817	1	1	1	0.536005	0.527772	1	1	1	1	1	0.990875	1	0.486114	0.466277	0.954771	1	0.7561	1	1	1	1	1	1	1	1	1	1	0.996528	1	0.581928	0.476394	1.00005	1	1	0.966673	0.997719	0.864908	0.639357	1
Node 67	0.728069	1.00134	0.978782	0.431425	0.973253	0.923022	0.948902	0.776653	0.864846	0.543347	0.716037	0.0853088	0.797568	0.777111	0.193168	1	0.399369	1	1	0.90119	0.974969	0.561515	0.84409	0.789312	0.65313	0.358254	0.0759397	0.204086	0.20203	0.807492	1	0.941845	1	1	1	0.784647	0.844146	0.910324	1	0.537151	0.818545	1.00134	1	1	0.773247	0.94016	0.103506	0.0137746	0.284064
Node 68	0.584967	1.00104	0.98346	0.604741	0.781507	0.516901	0.97625	0.97798	0.958974	0.598131	0.000263746	0.71723	0.934912	0.77924	0.601763	1	0.842133	1	1	0.922766	0.824808	1	0.77151	0.926808	0.378153	0.115245	0.592504	0.274136	0.643144	0.925531	1	0.458904	1	1	1	1	0.726679	0.92954	1	0.455789	0.256478	1.00104	1	1	0.846135	0.953147	0.446224	0.173642	0.0423575
Node 69	0.334259	1.00005	0.999207	0.194307	0.187165	1	0.163063	0.309462	1	0.619817	1	1	1	0.536005	0.527772	1	1	1	1	1	0.990875	1	0.486114	0.466277	0.954771	1	0.7561	1	0.349931	0.853898	1	0.256001	1	1	1	1	1	0.996528	1	0.581928	1	1.00005	1	1	0.966673	0.997719	0.864908	0.639357	0.199464
Node 7	0.965099	1.00525	0.919831	0.218741	0.943773	0.0899291	0.751326	0.144921	0.770995	0.31519	0.523833	0.538792	0.831191	0.82591	0.211991	0.738692	0.389241	1	1	0.391955	0.380966	0.615134	0.812948	0.186476	0.295076	0.535627	0.0787604	0.0709359	0.0840516	0.142221	1	0.526749	1	0.26158	1	0.22404	0.108225	0.693439	1	0.698434	0.811996	1.00525	1	0.733918	0.315559	0.786289	0.435597	0.55489	0.089597
Node 70	1	1.00005	0.999207	1	0.187165	0.598195	1	0.309462	1	0.619817	1	1	1	1	0.527772	1	1	1	1	1	0.990875	1	1	0.466277	0.954771	1	0.7561	1	1	0.853898	1	1	1	1	1	1	1	0.996528	1	0.581928	0.476394	1.00005	1	1	0.966673	0.997719	0.864908	0.639357	0.199464
Node 71	0.260483	1.00015	0.997621	1	0.462978	0.935144	0.0710833	1	1	0.238096	1	1	1	0.553916	0.541618	1	1	1	1	1	0.972872	1	0.864313	0.847983	0.994054	0.635352	0.85057	0.238929	1	0.942213	1	0.588192	1	1	1	1	1	0.989621	1	0.197043	1	1.00015	1	1	0.90331	0.993171	0.950194	0.703633	1
Node 72	0.472171	1.00783	0.883104	0.636852	0.46677	0.972953	0.802486	0.00474989	0.979882	0.449322	0.281006	0.225108	0.252785	0.444169	0.943183	0.198551	0.9567	1	1	0.872884	0.23797	0.505663	0.521099	0.0291887	0.160671	0.360034	0.940763	0.807124	0.159561	0.484098	1	0.733594	0.405739	0.363076	0.266193	0.936752	0.068007	0.580073	0.000874088	0.0557067	0.304011	1.00783	1	0.0910378	0.103951	0.699306	0.0316532	0.00587428	0.31047
Node 73	0.579402	1.0185	0.747687	0.39149	0.768096	0.851227	0.74668	0.122535	0.731267	0.953867	0.589194	0.345595	0.11411	0.00725911	0.0453854	0.367793	0.345568	1	1	0.934227	0.576669	0.654712	0.915281	0.1164	0.975143	0.858872	0.357342	0.775124	0.879185	0.415322	1	0.935947	0.340143	1	0.407524	0.855864	0.0785637	0.640006	1	0.0188002	0.181714	1.0185	1	0.0660928	0.00176388	0.799313	0.654253	0.0435893	0.173098
Node 74	1	1.00005	0.999207	1	1	0.598195	1	1	1	1	1	1	0.194108	0.536005	1	1	1	1	1	1	0.990875	1	1	1	0.954771	1	0.7561	1	1	0.853898	1	0.256001	1	1	0.0167625	1	1	0.996528	1	0.581928	1	1.00005	1	1	0.966673	0.997719	0.864908	0.639357	1
Node 75	0.5568	1.0001	0.998414	1	1	0.838565	0.299543	0.523168	0.0465743	0.384162	1	1	1	1	0.278531	1	1	1	1	1	0.981832	1	0.236294	0.715152	0.911585	0.489583	0.571678	1	1	0.729136	1	0.446475	1	1	1	1	1	0.993069	1	1	1	1.0001	1	1	0.934456	0.995443	0.74806	0.869948	1
Node 76	0.803593	1.0002	0.99683	0.578645	1	0.818737	1	1	1	0.842893	0.170056	0.475317	0.57823	0.368338	0.727981	1	1	1	1	1	0.963993	1	0.930282	0.918875	0.83098	0.32292	0.326795	1	1	0.531621	1	0.271875	1	1	1	0.203354	1	0.986185	1	0.444215	0.651298	1.0002	1	1	0.873201	0.990905	0.559576	0.983092	1
Node 77	0.334259	1.00005	0.999207	1	0.187165	0.598195	1	0.309462	1	0.619817	1	1	1	0.536005	0.527772	1	1	1	1	1	0.990875	1	0.486114	0.466277	0.954771	0.285558	0.7561	1	0.349931	0.853898	1	1	1	1	1	1	1	0.996528	1	0.581928	0.476394	1.00005	1	1	0.966673	0.997719	0.864908	0.639357	1
Node 78
Node 79	1	1.00015	0.997621	0.47701	0.462978	0.214035	0.413773	0.670745	1	0.238096	1	0.311698	0.0983926	0.900123	0.894711	1	0.020024	1	1	0.0907013	0.972872	1	1	0.847983	0.870351	1	0.85057	1	0.0428376	0.622597	1	0.588192	1	1	1	1	1	0.989621	1	0.926943	0.856466	1.00015	1	1	0.90331	0.993171	0.950194	0.703633	1
Node 8	0.990035	1.00214	0.966408	0.318193	0.569168	0.194382	0.402773	0.231537	0.201786	0.111703	0.588852	0.78168	0.114368	0.955211	0.835662	0.461088	0.0657031	1	1	0.267774	0.673952	1	0.135929	0.226435	0.692028	0.902633	0.0312508	0.166952	0.214503	0.713179	1	0.29392	1	1	0.516964	0.695139	0.39629	0.860973	1	0.955411	0.937103	1.00214	1	1	0.232464	0.906368	0.46694	0.504966	0.647277
Node 80	0.70308	1.0005	0.992092	0.884797	0.584257	0.628593	0.214746	0.0127132	0.670149	0.958598	0.0731007	0.122733	0.606195	0.966453	0.993296	1	0.584718	1	1	0.579785	0.996448	1	0.588459	0.0346534	0.629428	1	0.982568	0.213991	0.738304	0.206013	1	0.492376	1	1	0.155562	0.433596	0.714652	0.965814	1	0.930604	0.786721	1.0005	1	1	0.712465	0.977415	0.234178	0.239158	0.320568
Node 81	0.431489	1.00035	0.994458	0.779667	0.126644	0.415957	0.320066	0.138596	0.0432183	0.747594	0.00286789	0.801258	1	0.957955	0.953822	0.342933	0.111798	1	1	0.762807	0.937837	1	0.204377	0.174992	0.723224	0.90503	0.768996	1	0.467563	0.727471	1	1	1	1	1	0.328259	0.584288	0.975947	1	0.976036	0.732951	1.00035	1	1	0.788756	0.984137	0.362008	0.937021	1
Node 82	0.91297	1.0003	0.995248	1	1	0.818329	1	0.891613	1	0.585362	1	0.720073	1	0.920887	0.706802	0.302298	0.409759	1	1	0.309718	0.998787	1	0.877094	0.9769	0.972854	1	0.548455	1	1	0.387597	1	0.83044	1	1	1	0.288965	0.528741	0.979348	1	0.506884	0.61103	1.0003	1	1	0.815957	0.986388	0.810948	0.299448	0.343324
Node 83	1	1.00005	0.999207	1	1	0.598195	1	0.309462	1	1	0.0455267	1	1	0.536005	0.527772	1	0.0841103	1	1	1	0.990875	1	1	0.466277	0.954771	0.285558	0.7561	1	1	0.853898	1	1	1	1	1	1	1	0.996528	1	0.581928	0.476394	1.00005	1	1	0.966673	0.997719	0.864908	0.639357	1
Node 84	0.334259	1.00005	0.999207	1	1	0.598195	1	0.309462	1	0.619817	1	0.371652	0.194108	0.536005	1	1	1	1	1	1	0.990875	1	0.486114	0.466277	0.954771	1	1	1	0.349931	0.853898	1	1	1	1	1	1	1	0.996528	1	1	0.476394	1.00005	1	1	0.966673	0.997719	0.864908	0.639357	1
Node 85	1	1.00005	0.999207	1	1	1	1	0.309462	0	0.619817	1	1	1	0.536005	1	1	1	1	1	1	0.990875	1	1	0.466277	0.954771	1	0.7561	1	0.349931	0.853898	1	1	1	1	1	1	1	0.996528	1	0.581928	0.476394	1.00005	1	1	0.966673	0.997719	0.864908	0.639357	1
Node 86	0.151174	1.00069	0.988945	0.530415	0.945099	0.687518	0.917336	0.673203	0.357126	0.547564	0.13133	0.425882	0.529655	0.858573	0.939727	1	0.331945	1	1	0.943771	0.879519	1	0.756306	0.503447	0.522992	0.809326	0.542895	1	0.916066	0.371938	1	0.499737	1	1	1	0.179208	0.82724	0.952465	1	0.234668	0.534206	1.00069	1	1	0.622083	0.968521	0.131	0.0721227	0.0432811
Node 87	1	1.00015	0.997621	1	0.0919652	0.645406	1	1	1	0.676294	1	0.751937	0.476623	0.900123	0.894711	1	1	1	1	1	0.972872	1	0.864313	1	0.870351	1	0.85057	1	0.281645	0.942213	1	1	1	1	1	1	0.313497	0.989621	1	0.197043	0.464615	1.00015	1	1	0.90331	0.993171	0.646993	0.953106	0.48699
Node 88	0.5568	1.0001	0.998414	1	1	1	1	1	1	0.384162	1	0.138114	0.350546	1	0.777013	1	0.16115	1	1	0.337048	0.981832	1	1	1	0.911585	0.489583	0.940522	0.166411	0.12244	0.729136	1	1	1	1	1	0.107444	1	0.993069	1	1	1	1.0001	1	1	0.934456	0.995443	0.981756	0.408766	0.359151
Node 89	0.211225	1.00025	0.996038	0.251092	0.645218	0.679453	1	0.843022	1	0.716225	1	0.0670066	0.660115	0.567283	0.551971	0.0301025	1	1	1	0.642177	0.955195	1	0.170593	0.76754	0.981348	0.8139	0.247074	1	0.235038	0.842366	1	0.772077	1	1	0.0810574	0.247375	1	0.982761	1	0.650902	0.455799	1.00025	1	1	0.844095	0.988644	0.862013	0.408131	0.671262
Node 9	0.291277	1.00055	0.991304	0.363688	0.340027	0.527792	0.261723	0.899118	1	0.344964	0.0867247	0.187775	0.906941	0.596652	0.574814	0.483158	1	1	1	1	0.904057	1	0.960031	0.947401	0.914253	0.866485	0.729994	0.632603	0.148504	0.175899	1	0.815074	0.205851	1	1	1	1	0.96246	1	0.0965784	0.853422	1.00055	1	0.239693	0.688709	0.975184	0.550692	0.832773	0.676366
Node 90	0.334259	1.00005	0.999207	1	1	1	1	1	1	1	1	1	0.194108	1	0.527772	1	1	1	1	1	0.990875	1	1	0.466277	0.954771	1	0.7561	1	1	0.853898	1	0.256001	1	1	1	1	1	0.996528	1	1	1	1.00005	1	1	0.966673	0.997719	1	1	1
[truncated: 35 more columns]
