# Supplementary material for: Conservation and Evolution of Cis-Regulatory Systems in Ascomycete Fungi
Source: PLoS Biol. 2004 Nov 9;2(12):e398. doi: 10.1371/journal.pbio.0020398 (PMC526180; doi:10.1371/journal.pbio.0020398)
Supplement: Dataset S36 — (384 KB XLS). [file pbio.0020398.sd036.xls]

## Sheet: Sheet1
UID	ABF1	ACE2	ADR1	AFT1	ARO80	ASH1	AZF1	BAS1	CAD1/YAP2	CAT8	CBF1	CHA4	CRZ1	CUP2	DAL80	ECM22	FKH1	FLO8	FZF1	GAL4	GAT1	GATGAG1	GATGAG2	GCN4	GCR1	GLN3	GZF3	HAC1	HAP1	HAP4	HCM1	HSF1	IME1	INO2/4	LEU3	LYS14	MAC1	MAL63	MATALPHA	MCB	MCM1	MCM1-2	MCM1-3	MET30/31	MIG1	MOT3	MSN2/4	MTsite1	MTsite2
Cluster_ABF1
Cluster_ACE2	0.0916089	1.0005	0.974503	0.67263	0.650176	0.0374224	1	0.53629	0.300849	0.0459486	1	1	0.656296	0.381943	0.888774	0.26228	1	1	1	1	0.536224	0.140965	0.125635	0.110343	0.686307	0.822445	0.962893	1	0.0290233	0.681669	1	0.771402	1	1	1	1	0.468289	0.880029	1	0.0390007	0.516135	1.0005	1	1	0.512663	0.948646	0.969042	0.0592875	1
Cluster_ADR1	0.753593	1.00069	0.964484	1	0.157214	0.0373776	0.729642	0.445013	1	0.128053	0.286382	0.825923	0.421923	0.45428	0.292894	1	1	1	1	0.755995	0.417874	1	0.808011	0.56392	0.204958	0.387876	0.68646	1	0.787012	0.157603	1	0.87335	1	1	1	0.0583579	0.587041	0.836157	1	0.834601	0.52758	1.00069	1	1	0.612124	0.928844	0.196063	0.963893	0.774781
Cluster_ARG80	0.56816	1.0005	0.974503	0.285779	0.0695984	0.548888	0.607098	0.0179164	0.300849	0.0459486	1	0.65363	0.268815	0.381943	0.981049	1	1	1	1	0.247715	0.536224	1	0.57617	0.0312018	0.686307	1	0.871455	1	0.00544038	0.681669	1	0.771402	1	1	1	1	0.468289	0.880029	1	0.308347	0.257745	1.0005	1	1	0.94025	0.948646	0.727061	0.957175	1
Cluster_ARG81	0.62249	1.00055	0.971989	0.101884	0.685065	0.955833	0.256579	0.106069	0.343083	0.0846714	1	0.0606358	0.308055	0.716634	0.510172	1	1	1	1	0.669852	0.503817	1	0.865576	0.0130894	0.330441	1	0.342999	1	0.0100144	0.344712	1	0.457667	1	1	0.0717568	0.271401	0.500844	0.868851	1	0.84612	0.587449	1.00055	1	1	0.459472	0.943657	0.832235	0.106796	0.689993
Cluster_Arginine	0.123958	1.00055	0.971989	1	0.685065	0.191037	0.64215	7.87901e-05	0.0251469	0.21943	1	1	1	0.464878	0.918987	1	1	1	1	0.669852	0.860289	1	0.386373	0.00231573	0.626761	1	0.154824	1	0.148279	0.587044	1	0.457667	1	1	1	1	0.500844	0.868851	1	0.994435	0.325965	1.00055	1	1	0.752023	0.943657	0.832235	0.4837	1
Cluster_ARO80	0.443382	1.0004	0	0.0061239	2.28387e-05	0.344873	0.00328831	1	1	0	1	0.00161168	0.00525061	0.215907	0.246401	1	1	1	1	0.174505	0	1	0.16767	0.691527	0	0.370319	0.00611238	0.0421491	0.00103893	0	1	1	1	1	1	0.0200805	1	0	1	0.000399551	0.134101	1.0004	1	1	0	0	0	0.899772	1
Cluster_ARO80	0.443382	1.0004	0	0.0061239	2.28387e-05	0.344873	0.00328831	1	1	0	1	0.00161168	0.00525061	0.215907	0.246401	1	1	1	1	0.174505	0	1	0.16767	0.691527	0	0.370319	0.00611238	0.0421491	0.00103893	0	1	1	1	1	1	0.0200805	1	0	1	0.000399551	0.134101	1.0004	1	1	0	0	0	0.899772	1
Cluster_ASH1	0.160338	1.0006	0.969481	0.36685	0.716476	0.970147	1	0.639736	0.384454	0.301992	1	0.752442	1	0.307901	0.807218	1	1	1	1	0.701502	0.473368	1	0.460742	0.682033	0.802056	0.874353	0.857168	1	0.189955	0.98952	1	0.220922	1	1	1	1	0.531409	0.857814	1	0.99653	0.651598	1.0006	1	1	0.410247	0.938693	0.901821	0.350685	0.721312
Cluster_Asparagine	0.33122	1.0001	0.994849	0.200114	1	1	0.170391	0.315555	0.0119859	0.624761	1	1	1	1	0.547507	1	1	1	1	0.00917609	0.882837	1	0.488733	0.0754761	0.644507	0.292219	0.778043	1	0.350546	0.855398	1	0.255539	1	1	1	1	0.118654	0.974769	1	0.61078	1	1.0001	1	1	0.707781	0.989514	0.869734	0.647142	1
Cluster_Autophagy	1	1.0003	0.984624	1	0.467477	0.400526	1	0.277774	1	0.947185	1	0.75692	0.473085	1	0.307767	1	1	1	1	1	0.688057	1	0.228336	0.210407	0.267682	0.244099	0.70872	1	1	0.846962	1	1	1	1	1	1	1	0.926193	1	0.727767	0.841135	1.0003	1	1	0.354526	0.968866	0.298911	0.187523	1
Cluster_AZF1	0.373851	1.00035	0.982084	1	0.148883	0.962072	0.479979	0.73478	1	0.967653	1	0.807977	0.526462	0.141732	0.725427	1	1	1	1	0.139387	0.646483	1	0.637876	0.894499	0.584471	0.701753	0.954387	1	1	0.921625	1	0.644052	1	1	1	1	1	0.914431	1	0.963233	0.883094	1.00035	1	1	0.298247	0.963772	0.936805	0.84908	0.152086
Cluster_BAS1	0.714965	1.00065	0.966979	1	0.0337609	0.777355	0.10306	0.0583463	0.424646	0.388702	0.268969	0.534671	0.137643	0.822088	0.660839	1	0.461758	1	1	0.73012	0.816696	1	0.762913	0.117786	0.0574913	0.634932	0.970827	0.102248	0.476515	0.409217	1	1	1	1	1	1	1	0.846917	1	0.997836	0.70825	1.00065	1	1	0.105695	0.933756	0.0984396	0.443256	0.383434
Cluster_Biotin	1	1.00005	0.997421	1	1	1	1	0.172684	1	0.387423	1	0.209978	1	1	1	1	1	1	1	1	0.939595	1	1	0.274747	1	1	0.528863	1	1	0.619718	1	1	1	1	1	1	1	0.987304	1	1	1	1.00005	1	1	0.841301	0.994743	0.63906	0.405971	1
Cluster_CAD1	0.62249	1.00055	0.971989	0.326644	0.30129	0.0701443	1	0.590449	0.0251469	0.0846714	1	0.0606358	0.308055	0.0922116	0.510172	0.0411907	1	1	1	0.669852	0.503817	1	0.647343	0.158181	0.626761	0.850637	0.577721	1	0.363029	0.587044	1	0.457667	1	1	1	1	0.142729	0.868851	1	0.401575	0.830362	1.00055	1	0.141655	0.459472	0.943657	0.395543	0.106796	0.306786
Cluster_CBF1	0.62249	1.00055	0.971989	0.707228	0.685065	0.84161	0.64215	0.106069	1	0.21943	1	0.925232	0.308055	1	0.918987	0.284389	0.407925	1	1	1	0.974833	1	0.647343	0.356683	0.952319	0.850637	0.919824	0.378124	0.148279	0.79522	1	0.802776	1	1	1	1	1	0.868851	1	0.644596	0.830362	1.00055	1	1	0.149363	0.943657	0.639416	0.25979	0.0915913
Cluster_CHA4	0.57897	1.00079	0.959512	0.515784	0.209343	0.385319	0.775739	0.79109	1	0.249201	1	0.683952	0.492288	0.979129	0.641943	1	0.53348	1	1	0.193036	0.748617	0.215846	0.496707	0.857828	0.0297323	0.478029	0.68566	1	0.62608	0.769555	1	0.167042	0.140612	1	1	0.369104	1	0.815045	1	0.994406	0.420719	1.00079	1	1	0.521971	0.919097	0.816629	0.0215585	0.214861
Cluster_CIN5	0.548989	1.00104	0.947193	0.666381	0.633606	0.722612	0.286989	0.899625	0.686493	0.0675127	1	0.268277	0.642565	0.496665	0.558208	0.472168	0.632433	1	1	0.326528	0.270064	1	0.389158	0.954121	0.382528	0.670076	0.605674	1	0.0118268	0.420695	1	0.804388	1	1	1	1	0.734688	0.76456	1	0.731354	0.943206	1.00104	1	0.0334759	0.131564	0.895171	0.668069	0.189309	0.357415
Cluster_CRZ1	0.0072697	1.00055	0.971989	0.707228	0.0183039	0.637387	1	0.590449	0.0251469	0.432555	1	0.706499	0.308055	0.716634	0.752813	1	1	1	1	0.284807	0.860289	0.153923	0.386373	0.618692	0.626761	0.850637	0.577721	1	0.0448639	0.587044	1	0.457667	1	1	0.0717568	1	0.500844	0.868851	1	0.401575	0.830362	1.00055	1	0.141655	0.459472	0.943657	0.832235	0.25979	0.0915913
Cluster_CUP9	0.83646	1.00045	0.977024	1	1	0.905235	1	0.477374	0.0114801	0.0206698	0.194972	0.0993517	0.229521	0.297599	0.971821	0.239489	1	1	1	0.596135	0.570713	1	0.775952	0.0162208	0.745642	0.788934	0.987317	1	0.0172318	0.773275	1	0.73504	1	1	0.0591015	1	0.101177	0.891351	1	0.457074	0.732184	1.00045	1	0.117477	0.211066	0.953662	0.998243	0.279131	0.228494
Cluster_DAL81	1	1.00025	0.987171	1	1	0.615505	0.373143	0.612464	1	0.913768	1	0.692292	1	0.178934	0.527171	1	0.211956	1	1	1	0.732302	1	0.813123	0.419284	0.944243	0.18101	0.84653	0.19417	0.660115	0.37183	1	0.521834	1	1	1	1	1	0.938106	1	0.620594	0.784122	1.00025	1	1	0.81899	0.973988	0.747626	1	1
Cluster_DAL82	0.37617	1.00084	0.957036	0.850233	0.832351	0.277264	0.0585912	0.582724	1	0.851037	1	0.724952	0.52538	0.936214	0.50101	1	0.5552	1	1	1	0.920646	0.227678	0.758327	0.728458	0.560674	0.94708	0.110345	1	0.426389	0.702085	1	0.418727	1	1	1	1	0.0818406	0.980741	1	0.827868	0.865965	1.00084	1	1	0.479272	0.914262	0.0871959	0.958195	0.836388
Cluster_DIG1	0.0241131	1.00035	0.982084	0.163812	1	0.52092	1	1	1	0.552459	0.155216	0.165584	0.526462	0.3797	0.16414	1	1	1	1	0.505968	0.937502	1	0.637876	1	0.214884	0.307796	0.562938	0.260848	0.407021	0.921625	1	0.644052	1	1	1	1	1	0.914431	1	0.0749153	0.883094	1.00035	1	1	0.298247	0.963772	0.507228	0.593054	0.152086
Cluster_DOT6	0.792215	1.00109	0.944747	0.691519	0.377992	0.442551	0.596062	0.758353	1	0.497377	0.411583	0.870447	0.387896	0.727585	0.615314	0.487995	0.272986	1	1	0.891072	0.991138	1	0.629907	0.963848	0.744	0.701568	0.686777	0.613372	0.64269	0.101366	1	1	1	1	1	0.469237	0.393363	0.754843	1	0.0332757	0.728295	1.00109	1	1	0.529378	0.89046	0.605307	0.568759	0.386041
Cluster_DrugResistance	1	1.00035	0.982084	0.542328	0.520576	0.52092	1	0.73478	1	0.824377	1	0.165584	0.526462	0.3797	0.725427	1	0.283587	1	1	1	0.646483	1	0.904475	0.894499	0.214884	0.701753	0.562938	1	0.779287	0.921625	1	1	1	1	1	1	1	0.914431	1	1	1	1.00035	1	1	0.915142	0.963772	0.215584	0.84908	1
Cluster_Endocytosis	0.323675	1.00055	0.971989	0.707228	0.685065	0.637387	1	0.875795	1	0.673265	1	0.415719	0.69112	0.464878	0.752813	1	1	1	1	1	0.996898	1	1	0.97083	0.0892258	0.850637	0.577721	1	0.363029	0.344712	1	1	1	1	1	1	1	0.868851	1	0.644596	0.587449	1.00055	1	0.141655	0.149363	0.943657	0.832235	0.972349	1
Cluster_FattyAcid	0.792215	1.00109	0.944747	0.691519	0.900882	0.985594	1	0.758353	0.711262	0.0157936	0.411583	0.50411	0.387896	0.374039	0.893632	0.139794	0.64955	1	1	0.153839	0.95946	1	0.443256	0.892516	0.161993	0.701568	0.52457	0.237708	0.117522	0.914143	1	0.825056	1	1	1	1	1	0.754843	1	0.453351	0.870954	1.00109	1	1	0.529378	0.89046	0.430669	0.397791	0.0641855
Cluster_FHL1	0.291067	1.00299	0.856279	0.450813	0.245503	0.997005	0.974827	0.142116	0.333452	0.965591	0.00297874	0.741622	0.149266	0.000744203	0.80529	0.105013	0.533204	1	1	0.935625	0.99917	0.22886	0.670281	0.376952	0.999764	0.93034	0.912226	0.247589	0.849037	0.83681	1	0.304437	1	1	0.0620229	1	0.305148	0.823153	1	0.215708	0.0885008	1.00299	1	0.00141339	0.0288032	0.96023	0.488209	0.0018505	0.0766024
Cluster_FKH1	0.373851	1.00035	0.982084	1	1	0.52092	1	1	1	0.967653	0.155216	0.0393638	0.152828	0.694936	0.415488	0.191777	0.283587	1	1	1	0.646483	1	0.637876	0.894499	0.214884	1	0.0836963	1	1	0.747412	1	0.644052	1	1	1	1	1	0.914431	1	0.52718	0.883094	1.00035	1	1	0.298247	0.963772	0.936805	0.10211	0.152086
Cluster_FKH2	0.056727	1.00099	0.949644	0.892892	0.321248	0.485948	0.543282	0.696581	1	0.712087	1	0.63106	0.330308	0.97216	0.682811	1	0.614482	1	1	0.299246	0.287444	1	0.952296	0.483608	0.641945	0.849545	0.685994	0.578468	0.34472	0.809708	1	0.0464275	1	1	1	0.109142	0.717374	0.774402	1	0.179764	0.0562363	1.00099	1	1	0.363793	0.899906	0.991934	0.605461	0.613899
Cluster_Flavin	1	1.0002	0.989724	1	1	0.478285	0.311762	0.531555	1	0.502967	1	1	0.347616	0.775642	0.39671	1	0.1735	1	1	0.33163	0.77939	1	0.738626	0.723364	0.99849	0.121022	0.72952	1	0.171802	0.509522	1	1	1	1	1	1	1	0.950172	1	1	1	1.0002	1	1	0.878978	0.979136	0.543592	0.535101	1
Cluster_Flocculation	1	1.0002	0.989724	0.360197	1	0.478285	1	1	1	0.859214	1	1	0.347616	1	0.39671	1	1	1	1	0.0482816	0.979844	1	0.321879	0.723364	0.823527	0.121022	0.356978	1	0.57823	0.842786	1	0.445796	1	1	1	1	1	0.950172	1	1	0.706652	1.0002	1	1	0.500936	0.979136	0.983037	0.875508	0.346752
Cluster_FZF1	0.123958	1.00055	0.971989	1	0.685065	0.955833	1	1	1	0.21943	0.23286	0.183856	0.0922332	0.983605	0.752813	1	1	1	1	0.0808001	0.503817	1	1	0.97083	0.845099	0.540528	0.577721	1	0.148279	0.79522	1	0.802776	1	1	1	0.0372914	1	0.868851	1	0.0728587	0.965723	1.00055	1	1	0.752023	0.943657	0.941106	0.106796	0.0915913
Cluster_GAL4	1	1.0004	0	0.203791	2.28387e-05	0.344873	0.155279	1	0.0069782	0.879898	1	0.525634	0.19066	0.215907	0.000131371	1	1	1	1	0.00428625	0	1	0.16767	0.150808	0	0.000332905	0	1	0.479287	0	1	0.0156092	1	1	1	1	1	0	1	0.351129	0.134101	1.0004	1	1	0	0	0.401954	0.899772	1
Cluster_GAL4	1	1.0004	0	0.203791	2.28387e-05	0.344873	0.155279	1	0.0069782	0.879898	1	0.525634	0.19066	0.215907	0.000131371	1	1	1	1	0.00428625	0	1	0.16767	0.150808	0	0.000332905	0	1	0.479287	0	1	0.0156092	1	1	1	1	1	0	1	0.351129	0.134101	1.0004	1	1	0	0	0.401954	0.899772	1
Cluster_Galactose
Cluster_GAT1	0.753593	1.00069	0.964484	0.178018	0.770215	0.98657	0.358834	0.724087	0.463421	0.273607	1	0.336486	0.775823	0.0393247	0.996124	0.346825	0.486813	1	1	0.393744	0.417874	1	0.808011	0.784404	0.458622	0.91109	0.94071	0.453712	0.529655	0.547255	1	0.299624	1	1	1	1	1	0.836157	1	0.439763	0.9177	1.00069	1	1	0.829611	0.928844	0.791985	0.324105	0.420399
Cluster_GAT3	0.154092	1.0002	0.989724	1	1	1	1	0.531555	1	0.164994	1	0.196298	1	1	0.79527	1	1	1	1	1	0.77939	1	1	0.723364	0.415369	1	0.356978	0.158612	0.171802	0.842786	1	0.445796	1	1	1	1	1	0.950172	1	0.152768	0.285602	1.0002	1	1	0.500936	0.979136	0.16676	0.875508	1
Cluster_GCN4	0.199152	1.00109	0.944747	0.691519	0.659168	0.772143	0.596062	1.76298e-07	0.0272908	0.497377	0.411583	0.96174	0.904657	0.374039	0.615314	1	0.64955	1	1	1	0.253734	1	0.0267655	1.68124e-06	0.55625	0.977716	0.686777	1	0.64269	0.0399861	1	0.174627	1	1	1	0.127961	0.750941	0.754843	1	0.986505	0.202944	1.00109	1	1	0.298432	0.89046	0.758725	0.568759	0.90396
Cluster_GCR1	0.118796	1.00035	0.982084	1	0.148883	0.52092	0.479979	0.73478	1	0.967653	1	1	0.152828	0.141732	0.415488	1	1	1	1	1	0.937502	0.100894	0.022988	0.894499	0.584471	0.701753	0.562938	1	1	0.921625	1	0.644052	1	1	0.046275	0.182474	1	0.914431	1	0.52718	0.883094	1.00035	1	1	0.692204	0.963772	0.781771	0.0204155	0.00282228
Cluster_GCR2	0.269207	1.0005	0.974503	1	0.262662	0.990673	1	0.53629	1	0.0459486	1	0.905347	0.656296	0.056503	0.424301	1	1	1	1	0.634848	0.536224	1	0.310736	0.807283	0.384317	1	0.69177	1	0.884513	0.998909	1	1	1	1	1	1	1	0.880029	1	0.308347	0.786196	1.0005	1	1	0.512663	0.948646	0.727061	0.0592875	0.0718273
Cluster_GeneralTFs	0.332541	1.00129	0.935028	0.945226	1	0.526438	1	0.286024	0.316205	0.73335	0.00312825	0.826391	0.498331	0.980645	0.491935	1	0.3426	1	1	0.460309	0.79462	1	0.901505	0.425095	0.876826	0.10559	0.811884	0.301204	0.587661	0.926219	1	0.0195831	1	1	1	1	1	0.957276	1	0.0113369	0.720118	1.00129	1	1	0.60246	0.991806	0.979891	0.217331	0.264728
Cluster_GLN3	0.20001	1.00065	0.966979	1	0.0337609	0.570289	0.325123	0.68422	0.424646	0.0820442	1	0.534671	0.0355351	0.822088	0.957743	1	1	1	1	0.73012	0.816696	1	0.987247	0.498284	0.241196	0.634932	0.993597	0.429595	0.0891865	0.631958	1	0.8532	1	1	1	0.0509559	0.560103	0.846917	1	0.578524	0.70825	1.00065	1	1	0.365068	0.933756	0.944868	0.842271	0.749468
Cluster_Glutamate	0.552753	1.0002	0.989724	1	1	0.478285	1	0.531555	0.0618542	0.164994	1	1	1	0.775642	0.39671	1	1	1	1	1	0.77939	1	0.0727586	0.304086	0.415369	1	0.356978	0.158612	1	0.509522	1	0.445796	1	1	1	0.10874	1	0.950172	1	0.848526	0.706652	1.0002	1	1	0.500936	0.979136	0.543592	0.875508	1
Cluster_Glutathione	0.700917	1.0003	0.984624	0.1255	1	0.400526	0.0115189	0.277774	1	0.429612	1	0.75692	0.473085	0.604869	0.636873	1	1	1	1	0.453599	0.688057	1	0.866389	0.523722	0.662283	0.645474	0.399288	1	0.330161	0.0566197	1	1	1	1	1	1	1	0.926193	1	0.406247	1	1.0003	1	1	0.755901	0.968866	0.870362	0.775929	0.472038
Cluster_Glycerol	0.634261	1.00025	0.987171	1	1	0.615505	0.0662353	0.612464	0.000654425	0.295925	1	0.692292	1	1	1	1	1	1	1	0.0754218	0.967743	1	0.813123	0.13129	0.743049	1	0.84653	1	0.250689	0.71606	1	1	1	1	1	1	1	0.938106	1	0.905509	0.118842	1.00025	1	1	0.81899	0.973988	0.106558	0.926058	1
Cluster_Glycogen	0.0874848	1.00015	0.992283	1	1	0.314063	1	1	1	0.770152	1	0.50694	0.274093	0.673997	1	1	1	1	1	1	0.989502	1	1	1	0.517409	1	1	1	0.476623	0.945019	1	1	1	1	1	1	1	0.962392	1	0.757186	0.0183994	1.00015	1	1	0.595446	0.984311	0.703221	0.360613	0.0285164
Cluster_GTS1	0.866004	1.00089	0.954566	0.114514	0.849077	0.345838	1	1	0.601676	0.227905	0.351993	0.321842	1	0.860364	0.963484	1	1	1	1	0.836962	0.325629	1	0.409244	0.908333	0.873983	1	0.0276298	0.540416	0.0443225	0.261187	1	0.72887	1	1	1	0.404418	0.679288	0.794465	1	0.94958	0.33208	1.00089	1	1	0.438559	0.909451	0.163715	0.457301	0.555307
Cluster_HAL9	0.62249	1.00055	0.971989	1	0.30129	0.955833	0.256579	0.590449	0.0251469	0.21943	0.23286	0.415719	0.69112	0.0267459	0.510172	1	1	1	1	1	0.503817	1	0.647343	0.0529367	0.626761	0.850637	0.78681	1	0.660232	0.344712	1	0.457667	1	1	1	0.271401	1	0.868851	1	0.644596	0.830362	1.00055	1	1	0.752023	0.943657	0.832235	0.25979	0.0915913
Cluster_HAP2	1	1.00074	0.961995	0.4807	0.793136	0.511945	0.391903	0.941843	1	0.0787208	1	0.854751	0.45777	0.736292	0.997393	1	1	1	1	0.428459	0.989429	1	0.432607	0.824378	0.408594	0.925209	0.990094	1	0.0536908	0.669744	1	0.890735	1	1	1	1	1	0.825534	1	0.722945	0.360598	1.00074	1	1	0.0747906	0.923958	0.151204	0.615197	0.187764
Cluster_HAP3	0.622427	1.00084	0.957036	0.549254	0.236676	0.277264	0.795752	0.960207	1	0.700217	0.336178	0.724952	0.837307	0.82599	0.858435	1	1	1	1	0.494528	0.72568	1	0.557821	0.88555	0.560674	0.94708	0.986338	0.159916	0.870146	0.702085	1	0.418727	1	1	1	1	1	0.80469	1	0.931169	0.69476	1.00084	1	1	0.0529205	0.914262	0.581639	0.378761	0.242704
Cluster_HAP4	0.885563	1.00094	0.952102	0.611178	0.578035	0.416164	0.515144	0.972774	1	0.00847334	0.000925089	0.367943	0.58705	0.753914	0.972908	1	0.595654	1	1	0.555527	0.995451	1	0.467869	0.809203	0.845005	1	0.999013	0.559853	0.00123333	0.033837	1	0.108175	1	1	1	0.421329	0.698932	0.784369	1	0.998413	0.912023	1.00094	1	1	0.400026	0.904666	0.785926	0.200881	0.118026
Cluster_HAP5	0.330987	1.00079	0.959512	0.235117	0.813772	0.385319	0.424176	0.951894	1	0.431306	1	0.879151	0.492288	0.784855	0.984586	1	1	1	1	0.0600269	0.931695	1	0.876662	0.679432	0.806702	1	0.977342	1	0.0722391	0.0876583	1	0.905735	1	1	1	1	0.636073	0.815045	1	0.59693	0.835752	1.00079	1	1	0.252961	0.919097	0.919754	0.98369	0.490664
Cluster_Heme	0.165259	1.0004	0.979551	0.203791	1	0.976237	1	0.780596	1	0.000506443	1	0.525634	0.574433	0.215907	0.0818779	1	1	1	1	0.553319	0.607418	1	0.409925	0.383889	0.511588	0.370319	0.185678	0.29209	0.00910481	0.639437	1	0.0847143	1	1	1	1	0.396674	0.902817	1	0.632811	0.356701	1.0004	1	1	0.250899	0.958704	0.682684	0.98451	1
Cluster_HIR1	0.323675	1.00055	0.971989	0.326644	0.685065	0.394014	0.256579	0.875795	1	0.432555	1	0.925232	0.308055	0.716634	0.510172	1	1	1	1	0.284807	0.860289	1	0.647343	0.618692	0.626761	0.850637	0.154824	0.0761746	0.660232	0.978885	1	1	1	1	1	0.271401	1	0.868851	1	0.401575	0.587449	1.00055	1	1	0.149363	0.943657	0.832235	0.000841576	0.0915913
Cluster_HIR2	0.00686945	1.0004	0.979551	1	1	0.626548	1	0.780596	0.215564	0.154768	1	0.848312	1	0.215907	0.794922	1	1	1	1	1	0.919932	1	0.16767	0.150808	0.172498	0.749101	0.69787	1	0.822144	0.357884	1	0.302143	1	1	1	0.205673	1	0.902817	1	0.138876	0.913972	1.0004	1	1	0.629681	0.958704	0.401954	0.419804	0.0390306
Cluster_Histidine	0.700917	1.0003	0.984624	1	1	0.722995	0.429053	0.00990694	0.133418	0.429612	1	0.75692	1	0.277714	0.307767	1	1	1	1	1	0.95353	1	0.866389	0.00723455	0.983905	1	0.70872	1	0.726106	0.265167	1	1	1	1	1	1	1	0.926193	1	0.406247	0.192217	1.0003	1	1	0.755901	0.968866	0.624889	0.468062	1
Cluster_HMS1	1	1.00035	0.982084	0.542328	1	0.803825	1	0.104386	1	0.824377	1	0.450581	1	0.926878	1	1	0.283587	1	1	0.139387	0.646483	1	0.319079	0.0956372	0.856814	1	0.818056	1	0.407021	0.747412	1	0.644052	1	1	1	1	1	0.914431	1	0.52718	0.883094	1.00035	1	1	0.298247	0.963772	0.936805	0.593054	0.525363
Cluster_HSF1	0.242192	1.00069	0	0.00195569	1	0.431122	1	0.0224825	0.0585314	0	1	0.0541795	0.045867	0.679841	0.0034616	1	1	1	1	0.0384634	0	1	0.183011	0.0185192	0	0.0150896	0.0114522	1	0.00195163	0	1	0.00741441	1	1	1	0.0583579	0.209905	0	1	0.110127	0.9177	1.00069	1	1	0	0	0	0.0196039	0.0454429
Cluster_HSF1	0.242192	1.00069	0	0.00195569	1	0.431122	1	0.0224825	0.0585314	0	1	0.0541795	0.045867	0.679841	0.0034616	1	1	1	1	0.0384634	0	1	0.183011	0.0185192	0	0.0150896	0.0114522	1	0.00195163	0	1	0.00741441	1	1	1	0.0583579	0.209905	0	1	0.110127	0.9177	1.00069	1	1	0	0	0	0.0196039	0.0454429
Cluster_IME4	0.83646	1.00045	0.977024	0.244658	0.224049	0.450033	1	1	1	0.0206698	1	0.880175	1	0.568164	0.607937	1	1	1	1	0.0474847	0.570713	1	0.775952	1	0.745642	0.159908	0.57073	0.322014	0.0172318	0.532367	1	1	1	1	1	0.228215	0.433611	0.891351	1	0.218697	0.732184	1.00045	1	1	0.569564	0.953662	0.581359	0.779334	0.616406
Cluster_INO2	0.151437	1.00079	0.959512	0.832529	1	0.97	0.775739	0.539221	0.0893959	0.632869	1	0.0991059	0.492288	0.590602	0.641943	1	0.53348	1	1	0.193036	0.748617	1	0.141743	0.459731	0.806702	0.241187	0.494382	1	0.184325	0.0876583	1	0.665742	1	1	1	1	0.256196	0.815045	1	0.59693	0.420719	1.00079	1	1	0.0629126	0.919097	0.258696	0.940759	0.817996
Cluster_INO4	0.792215	1.00109	0.944747	0.415003	0.900882	0.772143	0.872019	0.913752	0.711262	0.00493805	1	0.50411	0.387896	0.55389	0.435839	1	1	1	1	0.353795	0.253734	1	0.795166	0.764071	0.55625	0.263665	0.109612	0.613372	0.00489041	0.530427	1	0.597708	1	1	1	1	0.393363	0.754843	1	0.956533	0.202944	1.00109	1	1	0.298432	0.89046	0.265781	0.729562	0.90396
Cluster_InvasiveGrowth	0.33122	1.0001	0.994849	1	1	0.607307	1	0.315555	1	0.624761	1	0.375874	1	1	0.547507	1	1	1	1	0.182453	0.882837	1	0.488733	0.474018	0.644507	1	0.778043	1	0.350546	0.855398	1	0.255539	1	1	1	1	1	0.974769	1	0.61078	1	1.0001	1	1	0.707781	0.989514	0.869734	0.647142	1
Cluster_Isoleucine	0.700917	1.0003	0.984624	1	0.113616	0.722995	1	0.0682073	1	0.746686	1	0.75692	0.116748	0.0130649	0.907379	0.166812	1	1	1	0.453599	0.688057	1	1	0.0521738	0.904581	0.645474	0.915436	1	1	0.265167	1	1	1	1	1	1	1	0.926193	1	0.406247	1	1.0003	1	1	0.354526	0.968866	0.298911	0.775929	1
Cluster_IXR1	0.0782175	1.0003	0.984624	0.488254	1	0.722995	1	0.277774	1	0.429612	0.134609	0.75692	0.473085	0.604869	0.636873	1	1	1	1	0.453599	0.688057	1	0.546792	0.210407	0.662283	0.645474	0.915436	1	0.091744	0.585157	1	0.587443	1	1	0.0397968	0.158599	0.315423	0.926193	1	1	1	1.0003	1	0.0799319	0.755901	0.968866	0.624889	0.468062	1
Cluster_LEU3	0.56816	1.0005	0.974503	0.285779	0.262662	0.548888	1	0.24171	1	0.33568	1	0.352484	0.268815	0.647973	0.981049	1	1	1	1	0.247715	0.536224	1	1	0.2845	0.884088	0.822445	0.871455	1	0.304461	0.864882	1	0.40778	1	1	1	1	0.468289	0.880029	1	0.556225	0.786196	1.0005	1	1	0.177555	0.948646	0.969042	0.842211	0.655156
Cluster_Leucine	0.552753	1.0002	0.989724	1	0.342996	1	1	0.140374	1	0.502967	1	1	1	0.775642	0.39671	1	1	1	1	1	0.77939	1	1	0.304086	0.415369	0.121022	0.72952	0.158612	1	0.509522	1	0.445796	1	1	1	1	1	0.950172	1	0.483168	1	1.0002	1	1	0.500936	0.979136	0.983037	0.535101	1
Cluster_Lysine	0.634261	1.00025	0.987171	1	1	0.615505	1	0.612464	0.095719	0.913768	0.113501	0.283265	1	0.845598	0.201018	1	1	1	1	0.395682	0.732302	1	0.813123	0.419284	0.743049	0.0310401	0.554004	1	1	0.71606	1	1	1	1	1	1	1	0.938106	1	0.905509	0.0191545	1.00025	1	0.0670664	0.421422	0.973988	0.747626	0.673307	1
Cluster_MAC1	0.443382	1.0004	0.979551	0.590691	0.568383	0.626548	1	0.780596	1	0.00691831	1	0.225419	1	0.767256	0.516941	1	1	1	1	0.00428625	0.919932	1	0.931705	0.691527	0.946302	0.749101	0.428006	1	0.0509994	0.639437	1	1	1	1	1	0.205673	1	0.902817	1	0.8664	0.666947	1.0004	1	0.105135	0.879772	0.958704	0.880858	0.98451	1
Cluster_MAL13	0.787611	1.00074	0.961995	0.206117	0.793136	0.715433	0.753767	0.101352	1	0.557283	0.303382	0.854751	1	0.154402	0.978349	0.366404	1	1	1	0.428459	0.392615	1	0.235395	0.030265	0.942581	0.925209	0.770844	0.476811	0.57962	0.830786	1	0.629956	1	1	1	1	0.612331	0.825534	1	0.95935	0.588301	1.00074	1	1	0.795105	0.923958	0.528497	0.408752	0.187764
Cluster_MAL33	0.982136	1.00099	0.949644	0.153769	0.877691	0.918829	0.845703	0.97748	0.168876	0.359708	0.382505	0.943434	1	0.911948	0.93277	1	1	1	1	0.866734	0.883374	1	0.952296	0.998385	0.641945	0.968504	0.515502	0.578468	0.562549	0.961767	1	0.290683	1	1	1	1	1	0.973755	1	0.0119131	0.929179	1.00099	1	1	0.363793	0.99511	0.934425	0.885304	0.136367
Cluster_Maltose	1	1.00005	0.997421	1	1	1	1	1	1	0.387423	1	1	1	1	1	1	1	1	1	0.0958143	0.939595	1	1	1	0.802817	1	0.528863	0.0422535	0.194108	1	1	1	1	1	1	1	1	0.987304	1	0.376116	0.264035	1.00005	1	1	0.841301	0.994743	0.63906	1	1
Cluster_ManualAFT1targets	0.154092	1.0002	0	1	1	0.0194176	1	1	1	0.0225184	1	0.196298	0.0535232	1	1	1	1	1	1	8.4043e-05	0	1	1	0.304086	0	1	0	0.0101081	1	0.842786	1	0.0932967	1	1.11377e-05	1	1	1.39627e-05	0	1	0.483168	0.285602	1.0002	1	1	0.500936	0	0	1	1
Cluster_ManualAFT1targets	0.154092	1.0002	0	1	1	0.0194176	1	1	1	0.0225184	1	0.196298	0.0535232	1	1	1	1	1	1	8.4043e-05	0	1	1	0.304086	0	1	0	0.0101081	1	0.842786	1	0.0932967	1	1.11377e-05	1	1	1.39627e-05	0	1	0.483168	0.285602	1.0002	1	1	0.500936	0	0	1	1
Cluster_ManualG1genes	0.690241	1.00154	0.923017	0.968682	0.829258	0.504532	0.944844	0.807823	0.44543	0.822188	1	0.915274	0.200086	0.998976	0.922922	0.237531	0.771866	1	1	0.956054	0.885554	1	0.997356	0.788434	0.743463	0.967804	0.98344	0.379085	0.575035	0.0526156	1	0.631348	1	1	1	1	0.294488	0.672745	1	7.31149e-06	0.748102	1.00154	1	0.0677987	0.440307	0.849153	0.692473	0.143237	0.383289
Cluster_ManualHAP1targets	0.000504545	1.00154	0	0.853823	0.0822605	0.000147654	0.00480698	0.15317	0.44543	0	1	0.000159769	0.000667406	0.79723	4.23225e-07	0.013204	0.426289	1	1	0.00740886	0	1	0.00552999	0.000332253	0	0.0179839	9.36135e-06	1	4.84634e-12	0	1	2.14795e-05	1	1	1	0.0109831	0.118573	0	1	1.603e-07	0.598025	1.00154	1	0.0677987	0	0	0	3.28376e-11	0.0863781
Cluster_ManualHAP1targets	0.000504545	1.00154	0	0.853823	0.0822605	0.000147654	0.00480698	0.15317	0.44543	0	1	0.000159769	0.000667406	0.79723	4.23225e-07	0.013204	0.426289	1	1	0.00740886	0	1	0.00552999	0.000332253	0	0.0179839	9.36135e-06	1	4.84634e-12	0	1	2.14795e-05	1	1	1	0.0109831	0.118573	0	1	1.603e-07	0.598025	1.00154	1	0.0677987	0	0	0	3.28376e-11	0.0863781
Cluster_ManualMethionine	0.255906	1.00094	0.952102	0.880228	0.292819	0.771993	0.237114	0.0946135	0.147091	0.0712883	1	0.9314	0.868616	0.888751	0.260286	1	0.0557808	1	1	0.852598	0.896438	1	0.00690745	0.0507831	0.936768	0.599974	0.600748	1	0.146529	0.209645	1	0.756453	1	1	1	0.421329	0.698932	0.976183	1	0.779454	0.590234	1.00094	1	1	0.0374442	0.904666	0.441124	0.97973	1
Cluster_ManualM-G1genes	0.226725	1.00025	0.987171	1	1	1	0.373143	1	1	0.640995	1	1	1	0.495817	0.201018	1	1	1	1	0.395682	0.732302	1	1	1	0.743049	0.18101	0.554004	1	0.660115	0.71606	1	1	1	1	1	1	0.270785	0.938106	1	0.620594	0.396775	1.00025	1	1	0.81899	0.973988	0.40757	0.327792	0.412725
Cluster_ManualYap1Targets	0.0104925	1.00164	0	0.128916	2.00277e-08	1.402e-06	1.45834e-05	0.00681221	0.000112608	0	1	0.000402906	0.110904	2.36947e-08	0.00785719	0.0163868	1	1	1	3.01439e-05	0	1	0.00147401	6.74252e-05	0	0.428887	0	0.409254	2.27638e-07	0	1	0.000934633	1	1	1	1	0.140473	0	1	3.12973e-08	0.674995	1.00164	1	0.0756327	0	0	0	8.76609e-06	0.00112786
Cluster_ManualYap1Targets	0.0104925	1.00164	0	0.128916	2.00277e-08	1.402e-06	1.45834e-05	0.00681221	0.000112608	0	1	0.000402906	0.110904	2.36947e-08	0.00785719	0.0163868	1	1	1	3.01439e-05	0	1	0.00147401	6.74252e-05	0	0.428887	0	0.409254	2.27638e-07	0	1	0.000934633	1	1	1	1	0.140473	0	1	3.12973e-08	0.674995	1.00164	1	0.0756327	0	0	0	8.76609e-06	0.00112786
Cluster_ManualZAP1targets	0.483199	1.00069	0.964484	0.790597	0.770215	0.10599	0.358834	0.445013	0.463421	0.475024	0.286382	0.336486	0.421923	0.860883	0.292894	1	0.486813	1	1	0.144194	0.794233	1	0.597557	0.334192	0.70788	0.91109	0.2807	0.453712	0.281665	0.744897	1	0.591245	1	1	1	0.0583579	0.587041	0.836157	1	0.99865	0.300696	1.00069	1	1	0.0889103	0.928844	0.196063	0.0196039	0.161645
Cluster_ManualZAP1targets-2	0.0217754	1.00179	0	0.53642	0.143644	1.88121e-08	0.0966294	0.00172383	0.0377672	2.08529e-06	0.211111	0.00132405	0.025044	0.451384	3.72444e-08	0.293469	0.0845707	1	1	0.00157584	0	1	2.20944e-06	1.07691e-06	0	0.00749916	0	1.6076e-06	3.60264e-05	0	1	0.0022211	1	1	1	0.000478914	0.0208452	0	1	0.000382414	1.2223e-05	1.00179	1	1	0	0	0	0	0.000134511
Cluster_ManualZAP1targets-2	0.0217754	1.00179	0	0.53642	0.143644	1.88121e-08	0.0966294	0.00172383	0.0377672	2.08529e-06	0.211111	0.00132405	0.025044	0.451384	3.72444e-08	0.293469	0.0845707	1	1	0.00157584	0	1	2.20944e-06	1.07691e-06	0	0.00749916	0	1.6076e-06	3.60264e-05	0	1	0.0022211	1	1	1	0.000478914	0.0208452	0	1	0.000382414	1.2223e-05	1.00179	1	1	0	0	0	0	0.000134511
Cluster_MATa1	0.0072697	1.00055	0	0.0222834	1	0.637387	0.012468	0.00552175	1	0.0238213	1	0.183856	0.308055	0.901858	0	1	1	1	1	0.000231925	0	1	0.386373	0.00231573	0	0.540528	0	1	0.660232	0	1	0.457667	1	1	1	0.0372914	1	0	1	0.000408754	0.325965	1.00055	1	1	0	0	0	0	1.32984e-06
Cluster_MATa1	0.0072697	1.00055	0	0.0222834	1	0.637387	0.012468	0.00552175	1	0.0238213	1	0.183856	0.308055	0.901858	0	1	1	1	1	0.000231925	0	1	0.386373	0.00231573	0	0.540528	0	1	0.660232	0	1	0.457667	1	1	1	0.0372914	1	0	1	0.000408754	0.325965	1.00055	1	1	0	0	0	0	1.32984e-06
Cluster_Mating	0.0413568	1.0004	0.979551	0.0061239	0.568383	0.344873	1	0.780596	1	0.154768	1	0.848312	1	0.767256	0.516941	1	1	1	1	0.553319	0.919932	1	1	0.691527	0.511588	0.749101	0.69787	1	0.822144	0.639437	1	0.692896	1	1	1	1	1	0.902817	1	0.8664	0.913972	1.0004	1	1	0.629681	0.958704	0.15346	0.419804	0.573305
Cluster_MBP1	0.764401	1.00104	0.947193	0.904217	0.889895	0.722612	0.859475	0.899625	0.1917	0.605644	1	0.953441	0.893902	0.680214	0.948235	0.472168	0.632433	1	1	0.611105	0.869732	1	0.962784	0.537511	0.59892	0.973507	0.978644	1	0.20942	0.754696	1	0.323559	1	1	1	1	0.371107	0.76456	1	0.00172696	0.307701	1.00104	1	1	0.329924	0.895171	0.668069	0.0398261	0.357415
Cluster_MCM1	0.123958	1.00055	0.971989	0.707228	0.30129	0.637387	0.64215	0.590449	0.343083	0.21943	1	0.706499	0.69112	1	0.510172	0.284389	1	1	1	0.284807	0.503817	1	0.975046	0.618692	0.845099	0.540528	0.342999	0.0761746	0.363029	0.922933	1	0.183291	1	1	1	0.271401	0.500844	0.868851	1	0.401575	0.0441677	1.00055	1	1	0.459472	0.943657	0.832235	0.25979	0.306786
Cluster_MET31	0.89065	1.00055	0.971989	1	0.30129	0.637387	0.067857	0.00552175	1	0.86353	1	0.706499	0.308055	0.716634	0.752813	1	1	1	1	0.284807	0.860289	1	0.0161377	0.0130894	0.845099	0.850637	0.919824	1	0.906941	0.587044	1	1	1	1	1	1	0.500844	0.868851	1	0.84612	0.830362	1.00055	1	1	0.149363	0.943657	0.832235	0.71772	0.689993
Cluster_MET4	0.121446	1.00074	0.961995	0.206117	1	0.870647	0.143885	0.0321091	1	0.184433	1	0.63854	0.0576867	0.971333	0.77647	1	0.510702	1	1	1	0.941984	1	0.235395	0.030265	0.658734	0.925209	0.770844	1	0.329799	0.669744	1	0.890735	1	1	1	0.35067	0.232982	0.825534	1	0.722945	0.588301	1.00074	1	1	0.566379	0.923958	0.319425	0.796417	0.456189
Cluster_MIG1	0.532473	1.00074	0.961995	0.812732	0.793136	0.95745	0.753767	0.252223	0.500607	0.557283	0.0483919	0.854751	1	0.736292	0.57647	1	0.152362	1	1	1	0.941984	1	0.657539	0.0884457	0.408594	0.713413	0.590021	1	0.818918	0.465595	1	0.629956	1	1	1	0.35067	1	0.825534	1	0.875203	0.799829	1.00074	1	0.188049	0.795105	0.923958	0.319425	0.97564	0.456189
Cluster_Mitochondria	0.660382	1.00119	0.939876	0.0349866	0.433665	0.72696	0.644126	0.809528	1	0.00144925	0.439294	0.391006	0.444197	0.658473	0.0594307	1	0.307967	1	1	0.192903	0.569966	0.0502876	0.720044	0.928477	0.820908	0.757564	0.124857	0.64539	0.0302311	0.568709	1	0.860587	1	1	1	1	0.0136416	0.735777	1	0.414578	0.971289	1.00119	1	0.0428302	0.0872381	0.881112	0.78475	0.126332	0.442227
Cluster_MitochondrialRPs	0.689503	1.00184	0.908804	0.0363974	0.000160064	0.667966	0.652855	0.992196	1	0.00114934	0.0573788	0.23605	0.318914	0.76147	0.951628	0.67576	0.518791	1	1	0.00197661	0.993986	1	0.972957	0.999244	0.38592	0.94719	0.977481	0.797867	5.74653e-05	0.0104022	1	0.899244	1	1	0.221685	0.655525	0.396711	0.623017	1	0.0138254	0.951049	1.00184	1	1	0.0132825	0.822676	0.266018	0.00245506	0.164809
Cluster_MOT3	0.300978	1.0003	0.984624	1	0.467477	0.722995	1	0.679402	1	0.746686	1	0.369153	0.473085	0.604869	0.636873	1	1	1	1	1	0.688057	1	0.866389	0.523722	0.267682	0.645474	0.399288	0.228228	0.726106	0.265167	1	0.587443	1	1	1	0.158599	1	0.926193	1	0.941057	0.841135	1.0003	1	1	0.354526	0.968866	0.624889	0.187523	1
Cluster_mRNAprocessing	0.6298	1.00289	0.860726	0.266253	0.119423	0.921454	0.598696	0.999783	1	0.599527	0.04916	0.88577	0.128238	0.0644035	0.941139	1	0.758738	1	1	0.48575	0.940713	0.217744	0.99323	0.99597	0.390346	0.964019	0.913479	0.918537	0.712664	0.246287	1	0.699514	0.103728	1	1	0.226904	0.477872	0.476098	1	0.000134582	0.699755	1.00289	1	1	0.415246	0.736285	0.979385	0.00878041	0.00154749
Cluster_MSN2	0.323675	1.00055	0.971989	0.326644	0.30129	0.637387	0.64215	0.875795	1	0.432555	1	0.925232	0.308055	0.716634	0.00778425	1	1	1	1	1	0.503817	1	0.975046	0.849192	0.952319	0.247977	0.00976087	1	0.363029	0.344712	1	0.457667	1	1	1	1	1	0.868851	1	0.0728587	0.587449	1.00055	1	1	0.752023	0.943657	0.832235	0.25979	1
Cluster_MSN4	1	1.00035	0.982084	0.542328	0.520576	0.52092	1	0.73478	1	0.824377	1	0.807977	0.526462	0.694936	0.937704	1	1	1	1	1	0.646483	1	0.319079	0.614617	0.584471	0.701753	0.818056	0.260848	0.779287	0.921625	1	0.644052	1	1	1	1	1	0.914431	1	0.963233	1	1.00035	1	1	0.998411	0.963772	0.936805	0.84908	0.525363
Cluster_MSS11	0.160338	1.0006	0.969481	1	0.716476	0.996339	1	0.138265	0.384454	0.525815	0.251132	0.0244274	0.0266932	0.543367	0.165822	1	0.435482	1	1	0.701502	0.967922	0.166686	0.709544	0.081842	0.802056	0.294401	0.688309	0.404415	0.925014	0.269624	1	0.0703981	1	1	1	1	1	0.990256	1	0.492981	0.651598	1.0006	1	0.153496	0.125647	0.998254	0.901821	0.350685	0.113311
Cluster_MTH1	0.378121	1.0006	0.969481	0.36685	0.339548	0.266807	0.674077	0.897255	0.384454	0.301992	1	0.94094	0.722417	0.543367	0.941341	1	0.104792	1	1	0.701502	0.473368	1	0.460742	0.882624	0.802056	0.874353	0.857168	0.404415	0.0649281	0.874377	1	0.829845	1	1	1	1	1	0.857814	1	0.00965136	0.866115	1.0006	1	1	0.410247	0.938693	0.551393	0.168895	0.345482
Cluster_NDD1	0.116128	1.00094	0.952102	0.611178	0.292819	0.60308	1	0.661478	1	0.156753	0.367433	0.587664	0.58705	0.753914	0.434474	1	0.595654	1	1	0.101919	0.305942	1	0.985401	0.630738	0.467385	0.599974	0.600748	0.559853	0.0587732	0.0956975	1	0.939474	0.164698	1	1	0.421329	0.325686	0.784369	1	0.00633951	0.386052	1.00094	1	1	0.644072	0.904666	0.441124	0.710522	0.867786
Cluster_NRG1	0.226725	1.00025	0.987171	0.0898041	1	0.615505	1	0.612464	0.095719	0.640995	1	0.692292	0.413696	0.178934	0.201018	1	1	1	1	0.0754218	0.732302	1	1	0.419284	0.944243	0.18101	0.554004	0.19417	1	0.992053	1	1	1	1	1	0.134027	1	0.938106	1	1	0.396775	1.00025	1	1	0.421422	0.973988	0.106558	0.327792	0.0828601
Cluster_NuclearProteinTargetting	0.893135	1.00134	0.932614	0.149776	0.280066	0.848153	0.216647	0.960371	0.811576	0.336389	0.478439	0.51325	0.289966	0.784141	0.918931	1	0.723903	1	0.0238399	0.934211	0.923128	1	0.824396	0.962347	0.853669	0.825279	0.92769	0.688519	0.43038	0.386321	1	0.517562	1	1	1	0.540447	0.0798299	0.708073	1	0.0182241	0.595287	1.00134	1	0.0530295	0.568829	0.867272	0.625051	0.566788	0.522308
Cluster_PDR1	0.634261	1.00025	0.987171	1	1	0.903387	0.373143	0.612464	1	0.295925	1	1	0.413696	0.178934	0.862295	1	1	1	1	1	0.732302	1	1	0.419284	0.743049	0.578578	0.84653	0.0163768	0.250689	0.992053	1	1	0.0462386	1	1	1	1	0.938106	1	0.620594	0.784122	1.00025	1	1	0.81899	0.973988	0.939666	0.0916788	1
Cluster_PentosePhosphate	1	1.0003	0.984624	0.488254	0.113616	0.939465	1	0.679402	0.133418	0.746686	1	0.75692	1	0.893744	1	1	0.248623	1	1	1	0.95353	1	0.228336	0.854516	0.904581	1	0.70872	0.228228	1	0.967424	1	1	1	1	1	1	1	0.997671	1	0.727767	1	1.0003	1	1	0.755901	0.999595	0.624889	0.775929	0.472038
Cluster_Peroxisome	0.671363	1.0006	0.969481	0.36685	0.716476	0.266807	0.674077	0.639736	1	0.301992	1	0.232534	0.34685	0.307901	0.351316	1	0.435482	1	1	0.321701	0.838762	1	0.709544	0.682033	0.931187	0.108706	0.688309	0.088925	0.420721	0.494887	1	0.829845	0.107421	1	1	1	0.531409	0.857814	1	0.273607	0.651598	1.0006	1	1	0.705599	0.938693	0.0360464	0.168895	0.721312
Cluster_PHD1	0.123958	1.00055	0.971989	0.707228	0.685065	0.637387	0.256579	1	0.343083	0.21943	1	0.0606358	0.69112	0.464878	0.510172	1	1	1	1	0.669852	0.860289	1	0.865576	0.849192	0.330441	0.850637	0.577721	0.378124	0.0448639	0.79522	1	0.183291	1	1	1	1	1	0.868851	1	0.957505	0.325965	1.00055	1	1	0.149363	0.943657	0.639416	0.25979	0.689993
Cluster_PHO4	1	1.00025	0.987171	0.0898041	0.408501	0.0681002	1	0.207919	1	0.913768	0.113501	0.692292	1	0.845598	0.201018	1	1	1	1	1	0.732302	1	0.813123	0.419284	0.944243	0.18101	0.554004	1	0.660115	0.92727	1	0.521834	1	1	1	1	0.270785	0.998434	1	0.620594	1	1.00025	1	1	0.421422	0.973988	0.939666	0.673307	1
Cluster_Phospholipid	0.169348	1.00104	0.947193	0.666381	0.633606	0.553229	0.570261	0.728849	1	0.0675127	0.397219	0.459643	0.0544849	0.979065	0.376297	1	1	1	1	0.0445375	0.270064	0.273251	0.757607	0.724241	0.382528	0.102691	0.147411	0.0567419	0.0118268	0.13049	1	0.057712	1	1	1	1	0.734688	0.971231	1	0.731354	0.492869	1.00104	1	1	0.131564	0.895171	0.318245	0.498817	0.357415
Cluster_Polyamine	1	1.00015	0.992283	1	0.27024	1	1	1	1	1	1	0.50694	1	0.230947	0.69563	1	1	1	1	0.260793	0.989502	1	1	1	0.898704	1	0.543249	0.121486	1	0.945019	1	1	1	1	1	1	1	0.962392	1	0.757186	1	1.00015	1	1	0.932451	0.984311	0.260968	0.360613	1
Cluster_Proline	0.154092	1.0002	0.989724	0.360197	0.342996	0.149842	0.311762	0.140374	1	0.502967	0.0918794	0.610487	1	1	0.105813	1	1	1	1	0.0482816	0.77939	1	0.321879	0.304086	0.973881	0.499064	0.0782093	0.158612	0.57823	0.842786	1	0.445796	1	1	0.026709	1	0.223239	0.950172	1	0.483168	0.285602	1.0002	1	1	0.500936	0.979136	0.543592	0.535101	1
Cluster_Proteasome	0.822531	1.00149	0.925407	0.392531	1	0.598183	1	1	0.419924	0.65844	0.0338257	0.62489	1	0.4669	0.689936	1	0.409966	1	1	0.951389	0.729109	1	0.985597	0.871493	0.442685	0.962776	0.891	1	0.540414	0.970729	1	0.79973	0.247405	1	1	1	1	0.681409	1	7.55093e-05	0.556331	1.00149	1	1	0.0372239	0.853648	0.982901	0.00992833	0.00819324
Cluster_Purine	0.57897	1.00079	0.959512	0.235117	0.0167452	0.385319	1	0.00270455	1	0.249201	0.319977	0.879151	6.65268e-05	0.590602	0.432432	0.385397	0.169027	1	1	0.800544	0.748617	1	0.876662	0.0462417	0.609411	0.747039	0.494382	0.498934	0.37829	0.592113	1	0.905735	1	1	1	1	1	0.815045	1	0.906863	0.950131	1.00079	1	1	0.252961	0.919097	0.115374	0.153735	0.0703439
Cluster_PUT3	1	1.00079	0	0.515784	0.483596	0.212903	0.0480869	0.0440578	0.0893959	0	1	0.00947443	0.492288	0.00957376	0.000654179	1	0.169027	1	1	0.462091	0	1	1.49118e-06	0.0462417	0	0.241187	0.00412629	0.144965	0.00577429	0	1	0.000570662	1	1	1	0.074168	1	0	1	0.0381674	0.644162	1.00079	1	1	0	0	0	0.000152336	0.0703439
Cluster_PUT3	1	1.00079	0	0.515784	0.483596	0.212903	0.0480869	0.0440578	0.0893959	0	1	0.00947443	0.492288	0.00957376	0.000654179	1	0.169027	1	1	0.462091	0	1	1.49118e-06	0.0462417	0	0.241187	0.00412629	0.144965	0.00577429	0	1	0.000570662	1	1	1	0.074168	1	0	1	0.0381674	0.644162	1.00079	1	1	0	0	0	0.000152336	0.0703439
Cluster_Pyrimidine	0.330987	1.00079	0.959512	0.832529	0.813772	0.903065	0.165993	0.293833	0.536087	0.0468757	1	0.0991059	1	0.379401	0.0445923	1	0.53348	1	1	0.193036	0.368882	1	0.876662	0.459731	0.362252	0.478029	0.0618244	0.498934	0.184325	0.769555	1	0.167042	1	1	1	1	0.636073	0.815045	1	0.780224	0.835752	1.00079	1	1	0.252961	0.919097	0.654274	0.300995	0.490664
Cluster_RAP1	0.671363	1.0006	0.969481	0.36685	0.339548	0.996339	1	0.639736	1	0.301992	1	0.476781	0.00456066	0.0471461	0.165822	1	1	1	1	0.701502	0.473368	1	0.709544	0.682033	0.981904	1	0.467132	1	0.189955	0.269624	1	0.829845	1	1	0.0780209	1	0.164639	0.857814	1	0.273607	0.651598	1.0006	1	0.153496	0.410247	0.938693	0.901821	0.168895	0.345482
Cluster_RCS1	0.373851	1.00035	0.982084	1	0.148883	0.240001	0.479979	0.73478	1	0.265816	1	0.807977	0.526462	0.694936	0.415488	1	1	1	1	0.139387	0.646483	1	0.319079	0.894499	0.584471	0.701753	0.276551	0.260848	1	0.747412	1	1	1	1	1	0.0153462	1	0.914431	1	0.808003	0.589385	1.00035	1	1	0.298247	0.963772	0.936805	0.593054	1
Cluster_REB1	0.219122	1.00089	0.954566	1	0.0277879	0.861495	0.81398	0.378774	0.126492	0.393217	0.351993	0.321842	0.55698	0.0274094	0.992258	1	0.575908	1	1	0.836962	0.70278	1	0.231613	0.371239	0.873983	0.955485	0.991878	0.175131	0.118817	0.960148	0.0071204	0.0282469	0.156745	1	1	0.404418	0.0939241	0.794465	1	0.0367164	0.33208	1.00089	1	1	0.438559	0.909451	0.837616	0.280586	0.852922
Cluster_RFX1	0.56816	1.0005	0.974503	0.67263	0.262662	0.785913	0.607098	0.849855	1	0.585734	1	1	0.656296	0.647973	0.686638	1	1	1	1	0.634848	0.536224	1	0.57617	0.547235	0.686307	0.822445	0.449691	1	0.606195	0.681669	1	1	1	1	1	1	1	0.880029	1	0.308347	0.0257463	1.0005	1	1	0.797167	0.948646	0.727061	0.176339	0.655156
Cluster_RGM1	0.800006	1.0004	0.979551	1	1	0.976237	1	0.780596	0.215564	0.879898	0.0143978	0.225419	0.19066	0.477976	0.516941	1	1	1	1	1	0.607418	1	0.931705	0.691527	0.511588	0.370319	0.428006	1	0.479287	0.855387	1	1	1	1	1	1	1	0.995725	1	0.351129	0.356701	1.0004	1	1	0.629681	0.958704	0.682684	0.183007	0.573305
Cluster_RGT1	0.151437	1.00079	0.959512	0.515784	1	0.773392	0.775739	0.539221	0.536087	0.431306	1	0.683952	0.492288	0.590602	0.245538	1	0.169027	1	1	0.800544	0.986568	0.215846	0.965608	0.679432	0.609411	0.747039	0.837099	0.144965	0.37829	0.389685	1	0.905735	1	1	1	0.369104	0.256196	0.982865	1	0.219835	0.835752	1.00079	1	1	0.252961	0.996869	0.654274	0.153735	0.0703439
Cluster_RIM101	0.910585	1.0006	0.969481	0.0306846	0.716476	0.266807	0.674077	0.897255	0.384454	0.136868	1	0.0864989	0.722417	1	0.351316	1	0.435482	1	1	0.701502	0.473368	1	0.896783	0.682033	0.802056	0.589753	0.10507	1	0.0167741	0.494887	1	0.829845	1	1	1	0.292081	0.531409	0.857814	1	0.888026	0.866115	1.0006	1	0.153496	0.410247	0.938693	0.551393	0.922785	1
Cluster_RLM1	1	1.0003	0.984624	0.488254	0.467477	0.144382	1	0.679402	0.00179224	0.429612	1	0.369153	0.116748	0.277714	0.307767	1	1	1	1	0.453599	0.688057	1	0.546792	0.210407	0.904581	0.244099	0.399288	1	0.330161	0.585157	1	1	1	1	0.0397968	1	0.315423	0.926193	1	0.727767	0.499054	1.0003	1	1	0.755901	0.968866	0.624889	0.775929	0.472038
Cluster_RME1	0.634261	1.00025	0.987171	1	1	0.903387	1	0.207919	1	0.295925	1	0.283265	1	0.495817	0.862295	1	1	1	1	0.395682	0.732302	1	0.44064	0.419284	0.743049	1	0.9768	1	0.660115	0.37183	1	1	1	1	1	1	1	0.938106	1	0.905509	1	1.00025	1	1	0.81899	0.973988	0.747626	0.327792	0.0828601
Cluster_RNAPol	0.660752	1.00149	0.925407	0.627578	0.95726	0.054074	0.939435	0.91131	1	0.238752	1	0.785527	0.822222	0.977896	0.148515	0.598694	0.409966	1	1	0.322975	0.154036	1	0.65505	0.608106	0.943905	0.876113	0.276031	0.363757	0.361413	0.519755	1	0.931146	1	0.0408592	1	1	0.108226	0.681409	1	0.00117602	0.97422	1.00149	1	1	0.471194	0.853648	0.993502	0.448021	0.95906
Cluster_ROX1	1	1.00005	0.997421	1	1	1	1	0.172684	1	0.387423	1	1	1	1	1	0.0299544	1	1	1	1	0.939595	1	1	0.274747	0.802817	1	0.528863	1	0.194108	1	1	0.137175	1	1	1	1	1	0.987304	1	0.376116	1	1.00005	1	1	0.841301	0.994743	0.63906	0.405971	1
Cluster_RPH1	0.753593	1.00069	0.964484	0.178018	0.0436325	0.237672	1	0.724087	1	0.128053	0.286382	0.588722	0.162673	0.249943	0.505096	1	1	1	1	1	0.794233	1	0.939975	0.784404	0.70788	0.387876	0.845997	0.453712	0.117429	0.744897	1	1	1	0.0192722	1	1	0.587041	0.836157	1	0.655613	0.9177	1.00069	1	1	0.612124	0.928844	0.60722	0.0639285	0.0095861
Cluster_RPs	0.970857	1.00439	0.796344	0.324316	0.259282	0.999973	0.90255	0.346544	0.25336	0.927414	0.000246114	0.852421	0.00662896	7.37997e-05	0.954568	0.0486174	0.985022	1	1	0.974215	0.999996	0.147527	0.639906	0.36985	0.9998	0.990758	0.9987	0.0785887	0.5517	0.192079	1	0.220472	1	1	0.119025	1	0.292713	0.324056	1	0.375588	0.00797219	1.00439	1	0.00137044	3.72546e-05	0.921677	0.898113	0.000153575	0.0296775
Cluster_rRNAprocessing	0.800961	1.00144	0.927803	0.604073	0.326753	0.257394	0.484998	0.971183	0.394146	0.988666	1	0.0276329	0.337595	0.576017	0.0263455	1	0.0438364	1	1	0.94623	0.470074	0.356512	0.44967	0.722221	0.478576	0.697442	0.118978	0.71432	0.939752	0.00410438	1	0.576629	1	1	1	1	0.840017	0.690184	1	0.8214	0.913991	1.00144	1	1	0.13916	0.858165	0.512284	0.387682	0.335559
Cluster_RTG1	0.33297	1.00104	0.947193	0.385309	0.633606	0.0192962	0.570261	1	0.686493	0.144951	1	0.268277	0.642565	0.832132	0.558208	1	0.632433	1	1	0.326528	0.869732	1	0.579002	0.724241	0.89794	0.432994	0.272508	0.22189	0.0954005	0.754696	1	0.564837	1	1	1	0.453725	0.371107	0.76456	1	0.386822	0.307701	1.00104	1	1	0.329924	0.895171	0.906011	0.815096	0.640897
Cluster_RTG3	0.700917	1.0003	0.984624	0.0184134	1	0.144382	0.429053	1	1	0.746686	1	0.75692	0.473085	1	0.636873	1	1	1	1	0.453599	0.688057	1	0.866389	0.854516	0.662283	0.645474	0.399288	1	0.330161	0.585157	1	0.587443	1	1	1	0.158599	1	0.926193	1	0.14781	0.499054	1.0003	1	1	0.354526	0.968866	0.870362	0.775929	1
Cluster_RTS2	0.154092	1.0002	0	1	0.051975	0.478285	1	1	1	0	0.00328679	1	0.0535232	0.369064	0.39671	1	1	1	1	0	0	1	0.321879	0.304086	0	0.121022	0.72952	1	0.171802	0	1	1	1	1	1	1	1	0	1	0.483168	0.285602	1.0002	1	1	0	0	0	0.535101	0.0532314
Cluster_RTS2	0.154092	1.0002	0	1	0.051975	0.478285	1	1	1	0	0.00328679	1	0.0535232	0.369064	0.39671	1	1	1	1	0	0	1	0.321879	0.304086	0	0.121022	0.72952	1	0.171802	0	1	1	1	1	1	1	1	0	1	0.483168	0.285602	1.0002	1	1	0	0	0	0.535101	0.0532314
Cluster_SFL1	0.300978	1.0003	0.984624	1	1	0.722995	1	0.277774	1	0.162238	1	0.369153	0.116748	0.604869	0.907379	1	0.248623	1	1	1	0.688057	1	0.546792	0.523722	0.904581	1	0.915436	1	0.0152016	0.585157	1	0.587443	1	1	1	1	0.315423	0.926193	1	0.14781	0.499054	1.0003	1	1	0.755901	0.968866	0.0680873	0.468062	1
Cluster_SFP1	0.323675	1.00055	0.971989	0.101884	0.30129	0.637387	1	0.292575	0.343083	0.673265	0.23286	0.706499	0.308055	0.0267459	0.752813	0.284389	1	1	1	0.669852	0.503817	1	0.975046	0.356683	0.989164	0.850637	0.78681	0.378124	0.660232	0.978885	1	0.457667	1	1	1	0.271401	1	0.868851	1	0.644596	0.830362	1.00055	1	0.141655	0.459472	0.943657	0.395543	0.4837	0.306786
Cluster_SIG1	0.431554	1.00065	0.966979	0.765846	0.744755	0.97993	1	0.68422	1	0.388702	1	0.283815	0.384887	0.0752338	0.226528	1	0.461758	1	1	0.358094	0.960128	1	0.531646	0.909072	0.0574913	0.341272	0.584108	1	0.234741	0.631958	1	0.549585	1	1	1	1	1	0.846917	1	0.578524	0.894817	1.00065	1	1	0.365068	0.933756	0.0984396	0.242687	0.136744
Cluster_SIP4	0.141586	1.00099	0.949644	0.355271	0.606567	0.0821719	0.845703	0.88336	1	0.538314	1	0.82309	0.881933	0.264713	0.317294	0.455852	0.237935	1	1	0.584003	0.287444	0.262115	0.183987	0.941984	0.813429	0.636207	0.341516	1	0.34472	0.166301	1	0.290683	1	1	0.126646	1	0.348531	0.774402	1	0.824018	0.439964	1.00099	1	0.242544	0.798992	0.899906	0.728859	0.767094	0.881149
Cluster_SKN7	0.62249	1.00055	0.971989	1	0.685065	0.84161	0.64215	0.292575	1	0.0238213	1	0.0606358	1	0.0922116	0.274027	1	0.407925	1	1	0.0808001	0.860289	1	0.865576	0.356683	0.626761	0.247977	0.577721	1	0.0448639	0.344712	1	1	1	1	1	1	0.500844	0.868851	1	0.957505	0.830362	1.00055	1	0.141655	0.149363	0.943657	0.395543	0.71772	1
Cluster_SKO1	0.755428	1.00035	0.982084	1	1	0.52092	1	0.34713	1	0.552459	0.01097	0.450581	0.526462	0.926878	0.16414	1	1	1	1	1	0.646483	1	0.637876	0.614617	0.856814	1	0.276551	1	0.407021	0.463466	1	0.644052	1	1	1	1	0.0639786	0.914431	1	0.808003	0.589385	1.00035	1	1	0.298247	0.963772	0.781771	0.593054	1
Cluster_SMP1	0.755428	1.00035	0.982084	1	1	0.240001	1	1	0.173706	0.824377	1	0.0393638	0.526462	0.3797	0.16414	1	1	1	1	0.139387	0.646483	1	0.319079	0.296484	0.584471	0.307796	0.276551	0.260848	0.779287	0.747412	1	1	1	1	1	0.182474	1	0.914431	1	0.52718	0.883094	1.00035	1	0.0926206	0.692204	0.963772	0.507228	0.10211	0.525363
Cluster_SOK2	0.0639231	1.00045	0.977024	1	1	0.213423	1	0.818498	0.258167	0.0859393	1	0.288453	1	0.297599	0.135718	1	0.348713	1	1	0.596135	0.570713	1	0.951175	0.755273	0.745642	0.0408681	0.121603	0.322014	0.545848	0.773275	1	1	1	1	1	1	1	0.891351	1	0.985696	0.438618	1.00045	1	0.117477	0.211066	0.953662	0.312252	0.532342	1
Cluster_sphingolipids	0.226725	1.00025	0.987171	0.427795	1	1	1	1	1	1	1	1	0.413696	0.495817	0.862295	1	1	1	1	1	0.732302	1	0.813123	0.799384	0.743049	1	0.84653	1	1	0.0913775	1	1	1	1	1	1	0.270785	0.938106	1	0.0699274	0.784122	1.00025	1	1	0.81899	0.973988	0.747626	0.0916788	0.0828601
Cluster_SRD1	0.465077	1.00094	0.952102	0.0431311	0.578035	0.249139	0.515144	0.661478	0.631742	0.466871	1	0.367943	0.868616	0.570623	0.434474	1	0.595654	1	1	0.272091	0.305942	1	0.998299	0.630738	0.0872035	0.962556	0.0542335	0.559853	0.302751	0.0956975	1	1	1	1	1	0.100035	0.698932	0.784369	1	0.0580957	0.976963	1.00094	1	1	0.828205	0.904666	0.627795	0.0974197	0.299772
Cluster_STB1	1	1.00035	0.982084	0.542328	0.148883	0.240001	0.479979	1	0.00381907	0.824377	1	0.807977	0.152828	0.3797	0.415488	1	1	1	1	1	0.646483	1	0.637876	0.894499	0.584471	0.701753	0.562938	0.260848	0.779287	0.998852	1	0.0587999	1	1	1	1	1	0.914431	1	0.963233	0.589385	1.00035	1	1	0.692204	0.963772	0.936805	0.301405	0.525363
Cluster_STE12	0.00686945	1.0004	0.979551	0.0438745	1	0.344873	1	0.780596	1	0.154768	0.175333	0.525634	0.574433	0.477976	0.246401	1	1	1	1	0.553319	0.919932	1	0.931705	0.923495	0.511588	0.120228	0.185678	0.29209	0.190221	0.855387	1	1	1	1	1	1	1	0.902817	1	0.138876	0.913972	1.0004	1	1	0.250899	0.958704	0.401954	0.899772	0.189771
Cluster_Sterols	0.450619	1.00119	0.939876	1	0.212534	0.931917	0.3628	0.614916	0.755879	0.0407291	0.439294	0.11178	0.444197	0.967325	0.0243668	0.518243	0.307967	1	1	0.407775	0.223974	1	0.996643	0.329188	0.473686	0.542744	0.372344	1	0.0771098	0.0595268	1	0.422533	1	1	1	1	0.780524	0.735777	1	0.031464	0.911757	1.00119	1	1	0.0872381	0.881112	0.316468	0.534937	0.442227
Cluster_STP1	0.753593	1.00069	0.964484	0.178018	0.413776	0.431122	1	0.724087	1	0.273607	1	0.825923	0.162673	0.679841	0.723137	1	0.486813	1	1	0.0076833	0.794233	1	0.366869	0.56392	0.458622	0.91109	0.68646	1	0.529655	0.744897	1	1	1	1	1	1	1	0.836157	1	0.439763	0.300696	1.00069	1	1	0.612124	0.928844	0.791985	0.532619	0.0454429
Cluster_STP2	0.532473	1.00074	0.961995	0.812732	0.793136	0.870647	0.753767	0.759607	0.500607	0.351635	0.303382	0.023341	0.798541	0.154402	0.77647	0.366404	1	1	1	0.77939	0.771502	1	0.845629	0.397308	0.843033	0.713413	0.963016	1	0.0536908	0.669744	1	0.890735	1	1	1	1	0.612331	0.825534	1	0.317982	0.360598	1.00074	1	1	0.286587	0.923958	0.94886	0.103435	0.456189
Cluster_SUM1	0.00064637	1.00065	0.966979	0.15109	0.132875	0.777355	0.10306	0.915008	1	0.388702	1	0.953349	1	0.946491	0.851131	1	1	1	1	0.358094	0.993901	0.179256	0.921123	0.909072	0.512035	0.894305	0.970827	0.429595	0.750247	0.631958	1	0.549585	1	1	1	0.0509559	0.560103	0.846917	1	0.356112	0.462756	1.00065	1	1	0.658728	0.997944	0.686405	0.242687	0.383434
Cluster_SWI4	0.764401	1.00104	0.947193	0.385309	0.349689	0.938697	1	0.899625	0.1917	0.428902	1	0.848373	1	0.832132	0.376297	0.472168	0.25545	1	1	0.0445375	0.270064	1	0.991847	0.34885	0.779624	0.231732	0.605674	0.596297	0.20942	0.941077	1	0.323559	1	1	1	1	0.036249	0.76456	1	0.386822	0.307701	1.00104	1	1	0.329924	0.895171	0.668069	0.815096	0.893161
Cluster_SWI5	0.242192	1.00069	0.964484	0.444089	0.157214	0.647603	1	0.724087	1	0.0475376	1	0.588722	1	0.0393247	0.969694	1	1	1	1	0.393744	0.417874	1	0.808011	0.56392	0.204958	0.676108	0.999558	0.116072	0.281665	0.157603	1	0.87335	0.124173	1	1	1	0.0501333	0.836157	1	0.655613	0.300696	1.00069	1	0.176691	0.829611	0.928844	0.389116	0.324105	1
Cluster_SWI6	1	1.00065	0.966979	0.406079	0.744755	0.916339	1	1	0.424646	0.984252	1	0.792037	1	0.615395	0.957743	1	1	1	1	0.73012	0.816696	1	0.987247	0.737158	0.97191	0.894305	0.993597	1	0.939578	0.925971	1	0.549585	1	1	1	1	0.560103	0.846917	1	0.0209318	0.70825	1.00065	1	1	0.105695	0.933756	0.686405	0.66337	0.383434
Cluster_TFs	1	1.0002	0.989724	0.360197	1	0.845811	1	1	1	0.859214	1	1	1	0.775642	1	1	0.1735	1	1	1	0.77939	1	0.0727586	1	0.415369	1	0.950746	1	1	0.979097	1	1	1	1	1	1	1	0.950172	1	0.848526	0.706652	1.0002	1	1	0.878978	0.979136	0.16676	0.186124	0.0532314
Cluster_THI2	0.269207	1.0005	0.974503	0.285779	1	0.785913	0.607098	1	1	0.585734	1	0.65363	0.656296	0.868181	0.200919	1	1	1	1	0.634848	0.536224	1	0.57617	0.959772	0.969067	0.822445	0.223251	1	0.884513	0.681669	1	0.771402	1	1	1	1	0.468289	0.880029	1	0.129047	0.953417	1.0005	1	1	0.94025	0.948646	0.727061	0.381923	0.26766
Cluster_Thiamine	1	1.0002	0.989724	1	0.342996	0.845811	0.311762	0.140374	1	1	1	1	1	0.369064	0.39671	1	1	1	1	0.33163	0.77939	1	1	0.304086	0.823527	0.121022	0.0782093	1	1	0.979097	1	0.445796	1	1	1	1	1	0.950172	1	0.848526	0.706652	1.0002	1	1	0.500936	0.979136	0.543592	0.186124	1
Cluster_tRNAprocessing	0.507843	1.00099	0.949644	0.153769	1	0.918829	1	0.462561	1	0.849429	1	0.63106	0.13745	0.137731	0.317294	1	0.614482	1	1	0.584003	0.883374	0.0360009	0.183987	0.679782	0.423745	0.636207	0.195067	0.206162	0.775297	0.166301	1	0.781573	1	1	1	1	0.717374	0.774402	1	0.922534	0.439964	1.00099	1	1	0.605342	0.99511	0.560419	0.0239578	0.00250859
Cluster_tRNAsynth	0.450619	1.00119	0.939876	0.472834	0.433665	0.56988	0.893848	4.42508e-05	0.0407818	0.177419	1	0.225118	0.0291433	0.658473	0.551395	1	0.0235178	1	1	0.0734178	0.82585	0.305663	0.982691	0.000347317	0.120826	0.912762	0.230767	0.64539	0.0302311	0.568709	1	0.225661	1	1	0.149996	1	0.436737	0.735777	1	0.264115	0.638422	1.00119	1	0.283502	0.0872381	0.881112	0.0857975	0.0249517	0.442227
Cluster_Tryptophan	0.866272	1.0005	0.974503	0.67263	0.650176	0.301751	0.607098	1.14384e-06	0.300849	0.33568	1	0.65363	0.656296	0.976173	0.981049	1	1	1	1	0.634848	0.881115	1	0.57617	6.68583e-05	0.384317	0.822445	0.993423	1	0.304461	0.432832	1	0.14761	1	1	0.0654504	0.250119	1	0.880029	0.000991645	0.791159	0.786196	1.0005	1	1	0.512663	0.948646	0.727061	0.013598	0.26766
Cluster_UGA3	0.753593	1.00069	0.964484	0.052356	0.413776	0.98657	1	0.929694	1	0.687336	1	0.588722	0.162673	0.860883	0.505096	1	1	1	1	0.144194	0.417874	0.191638	0.808011	0.929851	0.70788	0.676108	0.481757	0.116072	0.117429	0.957846	1	0.299624	1	1	1	1	1	0.836157	1	0.987246	0.757524	1.00069	1	1	0.323892	0.928844	0.911215	0.532619	1
Cluster_USV1	0.378121	1.0006	0.969481	0.738172	0.339548	0.970147	0.674077	0.639736	1	0.902376	1	0.0864989	0.722417	0.77439	0.589599	1	1	1	1	0.701502	0.473368	1	0.460742	0.682033	0.802056	0.589753	0.254332	1	0.420721	0.957615	1	0.505016	1	1	1	0.0439245	0.531409	0.857814	1	0.720404	0.866115	1.0006	1	1	0.410247	0.938693	0.317618	0.168895	0.721312
Cluster_Vacuole	0.54752	1.00244	0.881017	0.601232	0.962723	0.794355	0.940555	0.765121	1	0.435607	0.0289377	0.0185163	0.0231192	0.703249	0.778199	0.433913	0.671824	1	1	0.511074	0.425193	0.0375731	0.132108	0.82823	0.491412	0.525171	0.548249	0.87973	0.348571	0.977168	1	0.918679	1	1	1	0.756297	0.810348	0.534281	1	0.712514	0.99995	1.00244	1	1	0.0930616	0.77215	0.171717	0.0281217	0.374147
Cluster_YAP1	0.508369	1.00045	0.977024	0.633945	1	0.905235	1	0.477374	0.258167	0.743868	1	0.5934	0.229521	0.113793	0.334948	0.239489	1	1	1	1	0.901062	1	0.775952	0.468414	0.444715	0.430436	0.57073	1	0.545848	0.270642	1	0.73504	1	1	1	0.228215	1	0.891351	1	0.985696	0.732184	1.00045	1	0.117477	0.211066	0.953662	0.312252	0.779334	0.228494
Cluster_YAP5	0.634261	1.00025	0.987171	1	1	0.615505	1	1	1	0.913768	1	0.0658465	0.413696	0.178934	0.527171	1	1	1	1	1	0.732302	1	0.44064	1	0.743049	0.578578	0.554004	0.19417	0.660115	0.71606	1	1	1	1	1	1	1	0.998434	1	0.277028	0.396775	1.00025	1	1	0.81899	0.973988	0.747626	0.327792	1
Cluster_YAP6	0.27172	1.00194	0.904114	0.795311	0.553825	0.373154	0.463402	0.974607	0.631173	0.214562	0.065216	0.179524	0.770186	0.820241	0.174419	1	1	1	1	0.00302339	0.0878346	0.447344	0.710397	0.975447	0.772834	0.426418	0.641872	0.814618	0.119848	0.134942	1	0.996849	1	1	1	0.303856	0.698523	0.607269	1	0.853184	0.459297	1.00194	1	0.100677	0.0409531	0.814033	0.686612	0.0155482	0.00125156
Cluster_YFL044C
Cluster_YJL206C
Cluster_ZAP1	0.634261	1.00025	0.987171	1	0.408501	0.903387	1	1	0.095719	0.295925	0.113501	0.692292	1	0.495817	0.862295	1	1	1	1	1	0.732302	1	0.813123	0.13129	0.743049	1	0.84653	1	0.0534728	0.37183	1	0.521834	1	1	1	1	1	0.938106	1	0.905509	0.784122	1.00025	1	1	0.421422	0.973988	0.747626	0.673307	0.412725
Cluster_ZMS1	0.800006	1.0004	0.979551	0.590691	0.185929	0.862917	0.155279	1	0.0069782	0.376864	1	1	1	0.949681	0.516941	1	1	1	1	1	0.607418	1	0.931705	1	0.803121	1	0.69787	0.29209	0.479287	0.357884	1	0.302143	1	1	1	1	1	0.902817	1	0.351129	0.913972	1.0004	1	1	0.629681	0.958704	0.401954	0.183007	1
Node 1	0.226725	1.00025	0.987171	1	0.0084735	0.615505	0.0662353	0.207919	1	1	1	0.692292	0.413696	0.845598	0.862295	1	1	1	1	0.395682	0.732302	1	0.813123	0.13129	0.333449	1	0.9768	0.19417	1	0.0913775	1	0.521834	1	1	1	1	1	0.938106	1	1	0.784122	1.00025	1	1	0.421422	0.973988	0.40757	0.673307	0.412725
Node 10	0.83646	1.00045	0.977024	0.633945	1	0.714805	0.568615	0.818498	1	0.743868	1	0.288453	1	0.82414	0.607937	1	1	1	1	0.596135	0.985974	1	0.775952	0.944523	0.138471	0.430436	0.57073	1	0.246325	0.532367	1	0.73504	1	1	1	1	1	0.891351	1	0.218697	0.732184	1.00045	1	1	0.211066	0.953662	0.312252	0.532342	0.228494
Node 11	1	1.0002	0.989724	1	0.342996	0.478285	0.311762	1	1	0.502967	1	0.610487	0.347616	0.775642	0.39671	1	1	1	1	1	0.77939	1	0.738626	1	0.823527	0.499064	0.72952	1	0.57823	0.147468	1	0.445796	1	1	1	1	1	0.950172	1	1	0.285602	1.0002	1	1	0.500936	0.979136	0.16676	0.186124	1
Node 12	1	1.00015	0.992283	1	1	0.753929	1	1	1	0.770152	1	1	1	0.673997	0.69563	1	1	1	1	1	0.829504	1	0.63444	1	0.517409	1	0.895439	1	0.476623	0.945019	1	0.357671	1	1	1	1	1	0.962392	1	0.757186	1	1.00015	1	1	0.932451	0.984311	0.95299	1	1
Node 13	1	1.00035	0.982084	1	0.520576	0.962072	1	0.34713	1	0.552459	1	0.0393638	0.526462	0.926878	0.725427	1	1	1	1	1	0.937502	1	0.904475	0.614617	0.584471	0.701753	0.276551	0.260848	0.779287	0.747412	1	1	1	1	1	1	1	0.914431	1	0.963233	0.883094	1.00035	1	1	0.298247	0.963772	0.936805	0.301405	1
Node 14	0.57897	1.00079	0.959512	0.0211268	0.067679	0.773392	0.424176	1	1	8.35639e-05	1	0.232533	0.818958	0.590602	0.641943	0.385397	1	1	1	0.462091	0.998012	1	0.876662	1	0.146684	0.937087	0.494382	0.498934	2.40358e-05	0.592113	1	0.665742	1	1	1	0.369104	0.636073	0.815045	1	0.394318	0.420719	1.00079	1	0.199252	0.252961	0.919097	0.654274	0.153735	0.214861
Node 15	0.866272	1.0005	0.974503	0.0801744	0.0695984	0.935066	0.222266	1	1	0.00983607	0.214144	0.352484	0.656296	0.868181	0.686638	1	1	1	1	1	0.999844	1	0.825898	1	0.384317	0.822445	0.962893	0.00721743	0.00544038	0.432832	1	0.771402	1	1	1	1	0.468289	0.880029	1	0.791159	0.953417	1.0005	1	0.12965	0.177555	0.948646	0.238549	0.0592875	0.655156
Node 16	0.33122	1.0001	0.994849	1	1	0.607307	1	1	1	1	1	0.375874	1	1	0.107125	1	0.0908753	1	1	1	0.882837	1	1	0.474018	0.644507	0.292219	0.279684	1	1	0.855398	1	0.255539	1	1	1	1	1	0.974769	1	0.61078	1	1.0001	1	1	0.707781	0.989514	0.408386	0.164801	1
Node 17	1	1.0001	0.994849	0.200114	1	0.13937	1	0.315555	1	0.624761	1	1	1	0.526314	0.547507	1	0.0908753	1	1	1	0.882837	1	1	0.474018	0.961127	0.292219	0.279684	1	1	0.855398	1	0.255539	1	1	1	1	1	0.974769	1	0.141451	1	1.0001	1	1	0.974821	0.989514	0.408386	0.647142	1
Node 18
Node 19	1	1.00005	0.997421	1	1	1	1	1	1	1	1	0.209978	1	1	0.327316	1	1	1	1	1	0.939595	1	0.284963	1	0.802817	1	0.528863	1	1	0.619718	1	1	1	1	1	1	1	0.987304	1	1	1	1.00005	1	1	0.841301	0.994743	0.63906	0.405971	0.100972
Node 2	0.792215	1.00109	0.944747	1	0.170438	0.616473	0.312246	0.025507	0.0272908	0.329994	0.411583	0.870447	0.668032	0.727585	0.0698592	0.487995	0.64955	1	1	0.353795	0.612997	1	0.443256	0.0204571	0.55625	0.123159	0.213558	0.237708	0.117522	0.695025	1	0.174627	1	1	1	1	0.393363	0.754843	1	0.780159	0.356588	1.00109	1	0.263307	0.0222841	0.89046	0.871337	0.855012	0.90396
Node 2_fuzzy0.06	0.363028	1.00159	0.920633	1	0.093122	0.55873	0.318185	0.000102494	0.0193984	0.479717	0.537712	0.832063	0.849054	0.707383	0.067209	0.622411	0.782495	1	1	0.603416	0.695511	1	0.287601	0.000565154	0.37501	0.398584	0.289362	0.394255	0.272149	0.409325	1	0.270018	1	1	1	0.602118	0.129329	0.664191	1	0.904007	0.112569	1.00159	1	0.358917	0.0278266	0.844683	0.766029	0.978905	0.847835
Node 20	1	1.00005	0.997421	1	1	0.373339	1	1	1	0.387423	1	1	1	1	0.327316	1	1	1	1	1	0.939595	1	0.284963	1	1	1	0.528863	1	1	1	1	1	1	1	1	1	1	0.987304	1	0.376116	1	1.00005	1	1	0.841301	0.994743	0.63906	0.405971	1
Node 21	1	1.0001	0.994849	1	1	0.13937	1	1	1	0.150085	1	1	1	1	0.107125	1	1	1	1	1	0.882837	1	0.488733	1	1	1	0.279684	1	0.350546	0.855398	1	1	1	1	1	1	1	0.974769	1	0.61078	1	1.0001	1	1	0.707781	0.989514	0.869734	0.647142	1
Node 22	1	1.00005	0.997421	1	0.0996826	1	1	0.172684	1	1	1	1	1	1	1	1	1	1	1	1	0.939595	1	1	0.274747	1	1	0.528863	1	1	0.619718	1	1	1	1	1	1	1	0.987304	1	0.376116	1	1.00005	1	1	0.841301	0.994743	1	1	1
Node 23
Node 24
Node 25	1	1.00005	0.997421	1	1	1	0.0891688	1	1	0.387423	1	1	1	0.311744	0.327316	1	0.0465185	1	1	1	0.939595	1	0.284963	1	0.802817	0.158699	0.528863	1	1	0.619718	1	1	1	1	1	1	1	0.987304	1	1	1	1.00005	1	1	0.841301	0.994743	0.63906	0.405971	1
Node 26	1	1.00005	0.997421	1	1	1	1	1	1	1	1	0.209978	0.10127	1	1	1	0.0465185	1	1	1	0.939595	1	0.284963	1	1	1	1	1	1	0.619718	1	1	1	1	1	1	1	0.987304	1	1	1	1.00005	1	1	0.841301	0.994743	0.63906	1	1
Node 27	1	1.00005	0.997421	1	1	1	1	1	1	1	1	1	1	1	1	1	1	1	1	1	0.939595	1	0.284963	1	0.802817	1	1	1	1	1	1	1	1	1	1	1	1	0.987304	1	1	0.264035	1.00005	1	1	0.841301	0.994743	0.63906	0.405971	1
Node 28	1	1.00015	0.992283	1	1	0.753929	1	0.43376	1	0.770152	1	0.50694	1	0.230947	1	1	1	1	1	0.260793	0.989502	1	0.0231315	0.618544	0.517409	1	0.543249	0.121486	1	0.676154	1	1	1	1	1	1	1	0.962392	1	0.317968	0.60139	1.00015	1	0.0407952	0.932451	0.984311	0.95299	0.790406	1
Node 29
Node 3	1	1.00025	0.987171	1	0.408501	0.272454	0.373143	1	1	0.640995	1	1	1	0.845598	0.527171	0.141077	1	1	1	0.0754218	0.732302	1	1	1	0.743049	0.578578	0.84653	1	0.660115	0.0913775	1	0.521834	1	1	1	1	1	0.938106	1	0.905509	1	1.00025	1	0.0670664	0.81899	0.973988	0.40757	0.327792	0.0828601
Node 30	1	1.0002	0.989724	0.360197	1	1	0.311762	1	1	0.502967	0.00328679	1	0.347616	1	0.79527	1	0.1735	1	1	1	0.979844	1	1	0.723364	0.415369	1	0.950746	1	0.171802	0.509522	1	1	1	1	1	1	1	0.950172	1	0.848526	1	1.0002	1	1	0.500936	0.979136	0.16676	0.186124	0.0532314
Node 31	0.940217	1.00069	0.964484	0.178018	1	0.10599	1	0.724087	0.463421	0.273607	1	0.0541795	0.421923	0.679841	0.292894	1	0.136052	1	1	0.393744	0.417874	0.191638	0.939975	0.334192	0.70788	0.676108	0.481757	0.453712	0.281665	0.0539857	1	0.114188	1	1	1	0.331699	1	0.836157	1	0.655613	0.757524	1.00069	1	1	0.0889103	0.928844	0.60722	0.161269	0.161645
Node 32	0.37617	1.00084	0.957036	0.549254	1	0.460958	1	0.156125	1	0.169838	1	0.0477619	0.2441	0.651169	0.067843	1	0.185976	1	1	0.81967	0.346582	0.227678	0.758327	0.314852	0.560674	0.119048	0.404458	0.520123	0.221967	0.515132	1	0.418727	1	1	1	1	0.658362	0.80469	1	0.665879	0.69476	1.00084	1	1	0.222786	0.914262	0.882543	0.884092	0.523726
Node 33	1	1.00005	0.997421	1	1	1	1	1	0	0.387423	1	1	1	1	0.327316	1	1	1	1	1	0.939595	1	1	0.274747	0.802817	0.158699	0.528863	1	0.194108	1	1	1	1	1	1	0.0283674	1	0.987304	1	0.376116	0.264035	1.00005	1	1	0.841301	0.994743	1	0.405971	1
Node 34	1	1.0001	0.994849	1	1	0.607307	1	1	1	0.624761	1	1	1	1	0.547507	1	0.0908753	1	1	0.182453	0.996354	1	0.488733	1	0.961127	0.292219	0.778043	1	1	0.384039	1	0.255539	1	1	1	1	0.118654	0.974769	1	0.141451	1	1.0001	1	1	0.707781	0.989514	0.408386	0.647142	1
Node 35	0.697314	1.00334	0.840893	0.570945	0.669114	0.645567	0.859248	0.911696	0.0019743	0.0513943	0.801485	0.228443	0.234566	0.878163	0.733763	0.600445	0.608572	1	1	0.31086	0.997884	1	0.253531	0.481747	0.547572	0.635194	0.591303	0.152818	0.0492023	0.506136	1	0.308936	1	1	0.365026	0.570527	0.592842	0.790943	1	0.0913617	0.879564	1.00334	1	0.0652434	0.898941	0.70207	0.724945	0.142161	0.0346521
Node 36
Node 37	0.33122	1.0001	0.994849	1	1	0.607307	1	0.315555	1	0.624761	1	1	1	0.526314	0.547507	1	1	1	1	1	0.882837	1	1	0.474018	0.644507	1	0.279684	1	1	0.855398	1	1	1	1	1	1	1	0.974769	1	1	0.458365	1.0001	1	1	0.707781	0.989514	0.408386	1	1
Node 38	1	1.00005	0.997421	1	1	1	1	1	1	0.387423	1	1	1	0.311744	1	1	1	1	1	1	0.939595	1	0.284963	1	0.802817	1	0.528863	1	1	0.619718	1	1	1	1	1	1	1	0.987304	1	1	1	1.00005	1	1	0.841301	0.994743	0.63906	0.405971	0.100972
Node 39	0.0189456	1.00099	0.949644	0.355271	1	0.485948	0.0279523	0.0440023	0.168876	0.538314	0.0810581	0.63106	0.330308	0.911948	0.0823477	1	0.614482	1	1	0.299246	0.883374	1	0.33512	0.0704546	0.423745	0.394658	0.0939409	0.206162	0.34472	0.809708	1	0.530369	1	1	1	0.43776	0.120081	0.774402	1	0.496323	0.13135	1.00099	1	1	0.363793	0.899906	0.376888	0.767094	0.613899
Node 4
Node 40	1	1.00005	0.997421	0.105634	1	0.373339	1	0.172684	1	1	1	0.209978	1	0.311744	1	1	1	1	1	1	0.939595	1	0.284963	0.274747	1	1	1	1	1	1	1	1	1	1	1	1	1	0.987304	1	0.376116	1	1.00005	1	1	0.841301	0.994743	1	1	1
Node 41	1	1.0001	0.994849	1	1	1	1	1	1	0.624761	1	0.375874	0.192288	1	0.547507	1	1	1	1	1	0.882837	1	0.488733	0.474018	0.961127	1	0.279684	1	0.350546	0.855398	1	1	1	1	1	1	1	0.974769	1	0.61078	1	1.0001	1	1	1	0.989514	0.869734	0.647142	0.191753
Node 42	1	1.0001	0.994849	1	1	0.13937	1	0.315555	1	0.150085	1	1	1	1	0.547507	1	1	1	1	0.182453	0.882837	1	0.081194	0.474018	0.644507	1	0.778043	1	1	0.384039	1	1	1	1	1	1	1	0.974769	1	0.61078	0.458365	1.0001	1	1	0.707781	0.989514	0.408386	0.647142	0.191753
Node 43	0.453088	1.00015	0.992283	1	0.27024	0.314063	1	0.43376	0.0333348	0.770152	1	1	1	1	0.251261	1	0.133171	1	1	0.260793	0.829504	1	0.197319	0.184965	0.898704	0.404554	0.147902	1	1	0.945019	1	1	1	1	1	1	1	0.962392	1	0.317968	0.172316	1.00015	1	1	0.932451	0.984311	0.260968	0.790406	0.273372
Node 44	0.971232	1.00179	0.911157	0.905821	0.143644	0.621837	0.0966294	0.769065	0.566166	0.00063701	0.211111	0.961061	0.15157	0.727486	0.997303	0.665729	0.50407	1	1	0.0518124	0.999778	1	0.201413	0.90138	0.843501	0.984581	0.994362	0.4531	0.00178165	0.0721824	0.0141964	0.00705467	1	1	1	1	0.65568	0.631043	1	0.499778	0.488772	1.00179	1	0.393603	0.0598731	0.827031	0.438294	0.643822	0.150068
Node 45
Node 46	1	1.00005	0.997421	1	1	1	1	1	1	0.387423	1	1	1	0.311744	1	1	1	1	1	0.0958143	1	1	1	1	1	1	1	1	1	1	1	1	1	1	1	1	1	0.987304	1	0.376116	1	1.00005	1	1	0.841301	0.994743	0.63906	1	1
Node 47
Node 48	1	1.00005	0.997421	0.105634	1	1	1	1	1	0.387423	1	1	1	0.311744	0.327316	1	1	1	1	1	0.939595	1	1	1	0.802817	0.158699	0.528863	1	1	0.619718	1	1	1	1	1	1	1	0.987304	1	1	0.264035	1.00005	1	1	0.841301	0.994743	0.63906	1	1
Node 49	1	1.0001	0.994849	1	1	0.607307	1	1	1	0.624761	1	1	0.192288	1	1	1	0.0908753	1	1	1	0.882837	1	1	1	0.644507	1	0.778043	1	0.350546	1	1	0.255539	1	1	1	1	1	0.974769	1	1	0.458365	1.0001	1	1	0.707781	0.989514	0.869734	1	1
Node 5	0.0874848	1.00015	0.992283	1	1	1	1	0.43376	0.0333348	0.770152	1	0.50694	1	0.673997	0.69563	1	0.133171	1	1	1	0.989502	1	0.197319	0.184965	0.517409	1	0.895439	1	1	0.676154	1	1	1	1	1	1	1	0.962392	1	0.317968	0.60139	1.00015	1	1	0.932451	0.984311	0.703221	0.0668945	0.273372
Node 50
Node 51	1	1.00005	0.997421	1	1	1	1	1	1	0.387423	1	1	1	1	1	1	1	1	1	1	0.939595	1	1	1	0.802817	1	1	1	0.194108	1	1	1	1	1	1	1	0.0611982	0.987304	1	0.376116	0.264035	1.00005	1	1	0.841301	0.994743	1	1	1
Node 52	1	1.00005	0.997421	1	1	0.373339	1	1	1	1	1	1	1	1	1	1	0.0465185	1	1	1	0.939595	1	0.284963	0.274747	0.802817	1	1	1	1	1	1	1	1	1	1	1	1	0.987304	1	1	0.264035	1.00005	1	1	1	0.994743	0.63906	1	1
Node 53
Node 54
Node 55	0.552753	1.0002	0.989724	1	0.342996	0.478285	1	1	0.0618542	0.859214	1	0.610487	0.0535232	0.369064	0.79527	1	1	1	1	0.33163	0.77939	1	0.321879	1	0.415369	0.499064	0.950746	0.158612	0.57823	0.509522	1	1	1	1	0.026709	1	1	0.950172	1	0.848526	0.706652	1.0002	1	1	0.878978	0.979136	0.86285	0.535101	0.346752
Node 56	0.552753	1.0002	0.989724	1	0.342996	0.478285	1	1	0.0618542	0.859214	1	0.610487	0.0535232	0.369064	0.79527	1	1	1	1	0.33163	0.77939	1	0.321879	1	0.415369	0.499064	0.950746	0.158612	0.57823	0.509522	1	1	1	1	0.026709	1	1	0.950172	1	0.848526	0.706652	1.0002	1	1	0.878978	0.979136	0.86285	0.535101	0.346752
Node 57	1	1.00015	0.992283	0.284617	1	0.0520236	1	0.43376	0.0333348	0.770152	1	0.50694	0.274093	0.673997	0.251261	1	1	1	1	0.260793	0.829504	1	1	0.184965	0.992338	0.0675485	0.147902	0.121486	1	0.676154	1	1	1	1	1	1	1	0.962392	1	1	0.172316	1.00015	1	1	0.595446	0.984311	0.703221	1	1
Node 58	1	1.0002	0.989724	0.360197	1	0.478285	0.311762	1	1	0.164994	1	1	1	0.775642	0.39671	1	1	1	1	0.33163	0.979844	1	0.738626	1	0.823527	0.499064	0.72952	1	0.57823	0.147468	1	0.0932967	1	1	1	1	1	0.950172	1	0.483168	0.285602	1.0002	1	1	0.500936	0.979136	0.16676	0.186124	1
Node 59	0.552753	1.0002	0.989724	1	1	0.478285	0.0422081	0.531555	1	0.502967	1	0.610487	1	1	0.39671	1	1	1	1	1	0.979844	1	1	0.723364	0.823527	0.121022	0.72952	1	0.57823	0.509522	1	0.009255	1	1	1	1	1	0.950172	1	0.152768	0.706652	1.0002	1	1	0.500936	0.979136	0.16676	0.535101	1
Node 6	0.373851	1.00035	0.982084	0.163812	0.520576	0.240001	1	1	1	0.265816	1	0.807977	0.152828	0.926878	0.16414	1	0.283587	1	1	1	0.646483	1	0.904475	0.894499	0.214884	0.0147954	0.276551	1	0.407021	0.747412	1	1	1	1	1	1	0.35733	0.914431	1	0.963233	0.589385	1.00035	1	1	0.298247	0.963772	0.215584	0.301405	0.152086
Node 60	1	1.0001	0.994849	1	0.00993217	0.13937	1	1	1	1	1	0.375874	1	1	0.547507	1	1	1	1	1	0.882837	1	1	1	0.961127	1	0.279684	1	1	0.384039	1	1	1	1	1	1	1	0.974769	1	0.141451	0.458365	1.0001	1	1	0.707781	0.989514	0.408386	1	1
Node 61	0.33122	1.0001	0.994849	1	1	1	0.170391	1	1	0.150085	1	1	1	0.526314	0.547507	1	1	1	1	1	0.882837	1	1	1	0.644507	1	0.778043	1	0.350546	0.855398	1	1	1	1	1	1	1	0.974769	1	0.61078	1	1.0001	1	1	0.707781	0.989514	0.408386	0.164801	1
Node 62	1	1.00015	0.992283	1	0.27024	1	0.244373	1	1	1	1	0.50694	1	1	0.69563	1	0.133171	1	1	1	0.829504	1	1	1	0.898704	1	0.895439	1	1	0.676154	1	0.0512758	1	1	1	1	1	0.962392	1	0.317968	1	1.00015	1	1	0.595446	0.984311	0.260968	0.790406	1
Node 63	0.700917	1.0003	0.984624	1	1	1	1	1	1	1	1	0.75692	1	0.893744	0.0942691	1	1	1	1	1	0.688057	1	0.228336	0.854516	0.267682	0.645474	0.399288	1	1	0.265167	1	1	1	1	1	1	1	0.926193	1	0.727767	1	1.0003	1	1	0.354526	0.968866	0.870362	0.468062	0.116159
Node 64
Node 65	1	1.0002	0.989724	1	1	0.845811	1	1	1	0.859214	1	1	1	0.775642	1	1	0.1735	1	1	1	0.979844	1	0.321879	1	0.415369	1	0.72952	1	1	0.509522	1	0.445796	1	1	1	1	1	0.950172	1	0.483168	0.285602	1.0002	1	1	0.500936	0.979136	0.543592	1	1
Node 66	1	1.00005	0.997421	1	1	1	0.0891688	0.172684	1	0.387423	1	1	1	0.311744	0.327316	1	1	1	1	1	0.939595	1	1	0.274747	0.802817	1	0.528863	1	1	1	1	1	1	1	1	1	1	0.987304	1	1	0.264035	1.00005	1	1	1	0.994743	1	1	1
Node 67	0.562025	1.00134	0.932614	0.794597	0.941407	0.731503	0.919817	0.510189	0.811576	0.208751	1	0.0412225	0.944135	0.784141	0.384688	1	0.359714	1	1	0.934211	0.778557	0.336634	0.355644	0.900568	0.361467	0.431171	0.467669	0.31699	0.136757	0.898881	1	0.901621	1	1	1	0.540447	1	0.708073	1	0.972088	0.877735	1.00134	1	1	0.174721	0.867272	0.314277	0.566788	0.130313
Node 68	0.33297	1.00104	0.947193	0.666381	0.889895	0.855251	1	0.899625	1	0.605644	0.0129617	0.953441	0.893902	0.496665	0.376297	1	0.632433	1	1	0.879516	0.270064	1	0.999131	0.954121	0.382528	0.868436	0.605674	0.596297	0.803871	0.999927	1	0.564837	1	1	1	1	0.734688	0.76456	1	0.232805	0.307701	1.00104	1	1	0.567006	0.895171	0.809913	0.0141926	0.0150563
Node 69	1	1.00005	0.997421	1	0.0996826	1	0.0891688	0.172684	1	1	1	1	1	0.311744	1	1	1	1	1	1	0.939595	1	1	0.274747	0.802817	1	0.528863	1	1	1	1	0.137175	1	1	1	1	1	0.987304	1	1	1	1.00005	1	1	0.841301	0.994743	0.63906	0.405971	1
Node 7	0.820415	1.00525	0.761982	0.048699	0.998731	0.250833	0.837457	0.0856306	0.483438	0.220587	0.7171	0.201374	0.748245	0.677637	0.324986	0.612885	0.543191	1	1	0.424803	0.385508	0.797949	0.990324	0.154003	0.0969936	0.711774	0.218559	0.0336615	0.104937	0.314446	1	0.697214	1	1	1	0.178209	0.464028	0.850853	1	0.725343	0.600729	1.00525	1	0.425941	0.0782626	0.574149	0.769676	0.165701	0.00850351
Node 70	1	1.00005	0.997421	1	0.0996826	0.373339	1	0.172684	1	0.387423	1	1	1	1	1	1	1	1	1	1	1	1	1	0.274747	0.802817	1	1	1	1	0.619718	1	1	1	1	1	1	1	0.987304	1	0.376116	0.264035	1.00005	1	1	0.841301	0.994743	0.63906	0.405971	1
Node 71	0.453088	1.00015	0.992283	1	0.27024	0.753929	1	1	1	0.0581372	1	1	1	0.673997	0.69563	1	1	1	1	1	0.829504	1	0.63444	1	0.898704	1	0.543249	1	1	0.676154	1	0.357671	1	1	1	1	1	0.962392	1	0.317968	1	1.00015	1	1	0.595446	0.984311	0.703221	0.360613	1
Node 72	0.648766	1.00783	0.667391	0.588493	0.491219	0.999628	0.530936	0.00163993	0.930661	0.428166	0.168875	0.0659928	0.0248945	0.249231	0.951205	0.097486	0.44052	1	1	0.641962	0.998829	0.418728	0.631822	0.0434168	0.777585	0.759355	0.994999	0.900198	0.144818	0.212965	1	0.388589	1	1	0.0214036	0.988967	0.847957	0.135201	0.0154138	0.129037	0.0669062	1.00783	1	0.169259	0.000760486	0.801994	0.00574866	0.0161231	0.512741
Node 73	0.883372	1.0185	0.759505	0.742213	0.273921	0.455615	0.55458	0.0287333	0.641717	0.746878	0.15916	0.141212	0.00416702	0.00798716	0.00149515	0.202392	0.124849	1	1	0.872476	0.992457	0.642067	0.997023	0.245488	0.981199	0.995004	0.244624	0.137608	0.598812	0.0555014	1	0.901453	0.447359	1	0.0995099	0.947321	0.123202	0.0533663	1	0.499572	0.0519091	1.0185	1	0.0297059	1.61376e-07	0.701805	0.310363	0.003529	0.24555
Node 74	1	1.00005	0.997421	1	1	0.373339	1	1	1	1	1	1	0.10127	0.311744	1	1	1	1	1	1	0.939595	1	1	1	0.802817	1	0.528863	1	1	0.619718	1	1	1	1	0.00674469	1	1	0.987304	1	0.376116	1	1.00005	1	1	0.841301	0.994743	0.63906	0.405971	1
Node 75	1	1.0001	0.994849	1	1	0.607307	1	1	1	0.150085	1	1	1	1	0.547507	1	1	1	1	1	0.882837	1	0.488733	1	0.644507	0.292219	0.778043	1	1	1	1	1	1	1	1	1	1	0.974769	1	1	1	1.0001	1	1	0.974821	0.989514	0.869734	1	1
Node 76	1	1.0002	0.989724	1	1	0.478285	1	1	1	0.502967	0.0918794	1	1	0.369064	0.79527	1	1	1	1	1	0.77939	1	0.738626	0.723364	0.415369	1	0.0782093	1	1	0.509522	1	1	1	1	1	1	1	0.950172	1	0.483168	1	1.0002	1	1	0.500936	0.979136	0.16676	0.875508	1
Node 77	1	1.00005	0.997421	1	1	0.373339	1	1	1	1	1	1	1	0.311744	0.327316	1	1	1	1	1	0.939595	1	0.284963	1	0.802817	1	0.528863	1	1	0.619718	1	1	1	1	1	1	1	0.987304	1	0.376116	0.264035	1.00005	1	1	0.841301	0.994743	0.63906	0.405971	1
Node 78
Node 79	1	1.00015	0.992283	0.284617	1	0.314063	0.244373	0.43376	1	0.0581372	1	0.50694	0.274093	1	1	1	1	1	1	1	0.829504	1	1	0.618544	0.517409	1	0.895439	1	0.0983926	0.237982	1	1	1	1	1	1	1	0.962392	1	0.757186	0.60139	1.00015	1	1	0.595446	0.984311	0.703221	1	1
Node 8	0.966502	1.00214	0.894805	0.299491	0.632869	0.218567	0.0841717	0.197091	0.957228	0.0350029	0.273012	0.707894	0.645661	0.730484	0.879264	0.370578	0.600805	1	1	0.226278	0.956786	1	0.457215	0.276558	0.785591	0.697776	0.296314	0.107018	0.199334	0.902825	1	0.230354	1	1	1	0.710252	0.748664	0.896649	1	0.93225	0.913392	1.00214	1	1	0.302224	0.797017	0.503333	0.369757	0.643283
Node 80	0.56816	1.0005	0.974503	0.67263	0.262662	0.301751	0.607098	0.00293757	0.300849	0.945544	0.214144	0.0398065	0.656296	0.868181	0.888774	1	0.379023	1	1	1	0.881115	1	0.310736	0.00623342	0.384317	1	0.69177	0.350674	0.884513	0.681669	1	0.771402	1	1	1	0.250119	1	0.880029	1	0.791159	0.953417	1.0005	1	1	0.177555	0.948646	0.484224	0.381923	0.655156
Node 81	0.755428	1.00035	0.982084	1	0.148883	0.52092	0.479979	0.104386	0.173706	0.552459	0.155216	0.807977	1	0.926878	0.725427	0.191777	0.283587	1	1	1	0.937502	1	0.637876	0.0956372	0.214884	0.701753	0.954387	1	0.779287	0.747412	1	1	1	1	1	0.182474	0.35733	0.914431	1	0.963233	0.589385	1.00035	1	1	0.298247	0.963772	0.936805	0.84908	1
Node 82	0.700917	1.0003	0.984624	1	1	0.722995	1	0.679402	1	0.746686	1	1	1	0.893744	0.636873	0.166812	0.248623	1	1	0.106099	0.95353	1	1	0.854516	0.904581	1	0.70872	1	1	0.585157	1	1	1	1	1	0.158599	0.315423	0.926193	1	0.14781	0.192217	1.0003	1	1	0.945169	0.968866	0.624889	0.468062	0.472038
Node 83	1	1.00005	0.997421	1	1	1	1	0.172684	1	1	1	1	1	1	1	1	0.0465185	1	1	1	1	1	1	0.274747	1	1	1	1	1	0.619718	1	1	1	1	1	1	1	0.987304	1	1	0.264035	1.00005	1	1	0.841301	0.994743	0.63906	1	1
Node 84	0.182206	1.00005	0.997421	1	1	0.373339	1	0.172684	1	1	1	1	0.10127	1	1	1	1	1	1	1	0.939595	1	0.284963	0.274747	0.802817	1	1	1	1	0.619718	1	1	1	1	1	1	1	0.987304	1	1	0.264035	1.00005	1	1	0.841301	0.994743	1	0.405971	1
Node 85	1	1.00005	0.997421	1	1	1	1	1	1	1	1	1	1	0.311744	1	1	1	1	1	1	0.939595	1	1	1	1	1	0.528863	1	1	0.619718	1	1	1	1	1	1	1	0.987304	1	1	0.264035	1.00005	1	1	1	0.994743	1	0.405971	1
Node 86	0.00685105	1.00069	0.964484	0.178018	1	0.431122	1	0.445013	0.0585314	0.475024	1	0.963151	0.775823	0.860883	0.969694	1	0.136052	1	1	0.755995	0.794233	1	0.939975	0.160155	0.458622	1	0.68646	1	0.787012	0.744897	1	0.87335	1	1	1	0.0583579	0.587041	0.836157	1	0.0392358	0.0503665	1.00069	1	1	0.612124	0.928844	0.0168501	0.0639285	0.0015436
Node 87	1	1.00015	0.992283	1	0.27024	1	1	1	1	0.33398	1	0.50694	1	0.673997	1	1	1	1	1	1	0.989502	1	0.63444	1	0.898704	1	1	1	0.476623	0.676154	1	1	1	1	1	1	0.172596	0.962392	1	0.317968	0.60139	1.00015	1	1	0.595446	0.984311	0.703221	1	1
Node 88	0.33122	1.0001	0.994849	1	1	1	1	1	1	0.150085	1	0.0440826	1	1	1	1	0.0908753	1	1	0.182453	0.882837	1	1	1	0.644507	1	1	0.0827237	0.0376703	0.384039	1	1	1	1	1	1	1	0.974769	1	1	1	1.0001	1	1	0.707781	0.989514	0.869734	0.164801	1
Node 89	0.634261	1.00025	0.987171	0.0898041	1	0.615505	1	1	1	0.913768	1	0.283265	1	0.495817	0.527171	0.141077	1	1	1	1	0.732302	1	0.0254389	1	0.944243	1	0.0413547	1	0.660115	0.37183	1	0.521834	1	1	1	0.134027	1	0.938106	1	0.277028	0.396775	1.00025	1	1	0.421422	0.973988	0.939666	0.673307	1
Node 9	0.62249	1.00055	0.971989	0.326644	0.685065	0.84161	0.256579	0.875795	1	0.673265	0.23286	0.183856	1	0.464878	0.510172	1	1	1	1	1	0.974833	1	0.865576	0.849192	0.330441	1	0.577721	1	0.148279	0.147289	1	0.802776	0.0989256	1	1	1	1	0.868851	1	0.401575	0.830362	1.00055	1	1	0.149363	0.943657	0.395543	0.71772	0.306786
Node 90	0.182206	1.00005	0.997421	1	1	1	1	1	1	1	1	1	1	1	1	1	1	1	1	1	0.939595	1	1	0.274747	0.802817	1	1	1	1	0.619718	1	1	1	1	1	1	1	0.987304	1	1	1	1.00005	1	1	0.841301	0.994743	1	1	1
[truncated: 35 more columns]
