# Supplementary material for: Conservation and Evolution of Cis-Regulatory Systems in Ascomycete Fungi
Source: PLoS Biol. 2004 Nov 9;2(12):e398. doi: 10.1371/journal.pbio.0020398 (PMC526180; doi:10.1371/journal.pbio.0020398)
Supplement: Dataset S41 — (408 KB XLS). [file pbio.0020398.sd041.xls]

## Sheet: An_yeastConsensiEnrichment_2X_5
UID	NAME	ABF1	ACE2	ADR1	AFT1	ARO80	ASH1	AZF1	BAS1	YAP1	CAT8	CBF1	CHA4	CRZ1	CUP2	DAL80	GATA	ECM22	FKH1	FLO8	FZF1	GAL4	GAT1	GATGAG1	GATGAG2	GCN4	GCR1	GLN3	GZF3	HAC1	HAP1	HAP4	HCM1	HSF1	IME1	INO2/4	LEU3	LYS14	MAC1	MAL63	MATALPHA	MCB	MCM1	MCM1-2	MCM1-3	MET30/31	MIG1	MOT3	MSN2/4
Cluster_ABF1	YAL043C
Cluster_ACE2	YAL062W	1	1.00084	0.852161	1	1	0.704754	1	0.243825	1	1	0.215668	1	0.0470258	0.576117	0.669424	1	1	1	1.00084	1.00084	1	0.83355	1	1	0.158254	0.166866	1	0.482962	1	1	0.433851	1.00084	0.337869	1	1.00084	1.00084	1	1	0.651614	1.00084	0.640207	1	1.00084	1.00084	1	0.64675	0.82188	0.548997
Cluster_adata-aAlpha	YCR041W	1	1.00011	0.980208	1	1	1	1	1	1	1	1	1	1	1	1	1	1	1	1.00011	1.00011	1	0.906938	1	1	1	1	1	1	1	1	1	1.00011	0.148437	1	1.00011	1.00011	1	1	0.947889	1.00011	1	1	1.00011	1.00011	1	1	0.975787	1
Cluster_adata-ARG3	YJL088W	1	1.00137	0.771024	1	1	0.567231	0.0508067	0.0713796	1	0.00959164	1	1	1	0.386993	1	1	1	0.0163091	1.00137	1.00137	1	0.88634	1	0.510796	0.330367	0.0918917	1	0.621366	1	0.275051	0.328723	1.00137	0.595734	1	1.00137	1.00137	1	1	0.999658	1.00137	0.473443	0.539035	1.00137	1.00137	1	0.513436	0.961802	0.811616
Cluster_adata-CalciumSpecific	YGR288W	1	1.00222	0.992196	1	1	0.586858	1	1	1	0.428639	0.471713	1	1	0.361751	0.774928	0.648607	1	1	1.00222	1.00222	1	0.874843	1	0.310606	0.863003	0.635239	1	0.933299	1	1	0.969514	1.00222	0.191324	1	1.00222	1.00222	1	1	0.978501	1.00222	0.46934	1	1.00222	1.00222	1	0.912531	0.986497	0.961149
Cluster_adata-Chaperones	YBR085C-A	0.174425	1.00116	0.980945	1	1	1	1	1	1	0.172147	1	1	1	0.30987	0.425302	0.0967513	1	1	1.00116	1.00116	1	0.998023	1	0.453879	1	0.236805	1	0.90425	1	1	0.87942	1.00116	0.0151528	1	1.00116	1.00116	0.244561	1	0.890798	1.00116	1	0.480671	1.00116	1.00116	1	0.892648	0.997998	0.442997
Cluster_adata-EGT2	YDL117W	1	1.00053	0.904863	1	1	0.533425	1	1	1	0.299656	1	1	1	1	0.49928	0.220262	1	1	1.00053	1.00053	1	0.928462	1	1	0.376787	0.0836636	1	0.847838	1	1	0.82511	1.00053	1	1	1.00053	1.00053	1	1	0.765179	1.00053	1	1	1.00053	1.00053	1	0.818238	0.884634	1
Cluster_adata-ENA1	YGL168W	1	1.00053	0.904863	1	1	0.533425	1	1	1	1	1	1	1	1	0.49928	1	1	1	1.00053	1.00053	1	0.613536	1	1	1	0.655485	0.158873	0.499839	1	1	0.460135	1.00053	1	1	1.00053	1.00053	0.119653	1	0.765179	1.00053	0.472066	1	1.00053	1.00053	1	0.970187	0.884634	0.708084
Cluster_adata-ERD2	YBL040C	1	1.00053	0.996254	1	1	0.533425	1	1	1	1	1	0.0892895	1	1	0.49928	0.220262	1	1	1.00053	1.00053	1	0.613536	1	1	1	0.0836636	1	0.499839	1	1	0.460135	1.00053	0.552282	1	1.00053	1.00053	1	1	0.765179	1.00053	1	1	1.00053	1.00053	1	0.970187	0.884634	0.708084
Cluster_adata-G1DNAreplication	YDR098C-B	1	1.00137	0.973667	1	1	0.275489	1	0.365095	1	1	0.326222	1	1	1	0.515128	1	1	1	1.00137	1.00137	1	0.88634	1	0.510796	0.707707	0.412665	0.362389	0.194783	1	1	0.785108	1.00137	0.114392	1	1.00137	1.00137	1	1	0.498486	1.00137	0.00238191	1	1.00137	1.00137	1	0.873804	0.726987	0.310283
Cluster_adata-OAC1	YJL200C	1	1.00042	0.997723	1	1	0.456559	1	1	1	0.0257926	1	1	1	1	0.0836668	1	1	1	1.00042	1.00042	1	0.954294	1	1	1	1	1	0.372559	1	1	0.338331	1.00042	1	1	1.00042	1.00042	1	1	0.984842	1.00042	0.400104	1	1.00042	1.00042	1	1	0.996608	1
Cluster_adata-Respiration	YGL188C	1	1.00264	0.999889	1	1	0.88709	1	1	1	0.0886618	0.000749233	0.37384	1	0.738082	0.644081	1	1	1	1.00264	1.00264	1	0.99974	1	0.146849	0.395306	0.711642	0.579366	0.976031	1	0.0222562	0.463228	1.00264	0.982093	1	1.00264	1.00264	1	1	0.991596	1.00264	0.959136	0.774687	1.00264	1.00264	1	0.99361	0.999715	0.983163
Cluster_adata-RET3	YKL162C-A	0.30658	1.00222	0.656891	1	1	0.818797	0.0808135	1	1	0.428639	1	0.32508	1	0.645099	0.521682	0.648607	1	1	1.00222	1.00222	0.124716	0.405328	1	0.685088	0.577045	0.163541	1	0.325605	1	1	0.25758	1.00222	0.622178	1	1.00222	1.00222	0.414743	1	0.700233	1.00222	0.0978294	0.713939	1.00222	1.00222	1	0.101679	0.597333	0.703823
Cluster_adata-Secretion	YDR372C	1	1.00211	0.941371	1	1	0.141584	1	1	1	0.404184	0.455396	1	0.113519	1	0.750809	1	1	1	1.00211	1.00211	1	0.716341	1	0.290452	0.55001	0.94501	0.49973	0.271081	1	1	0.960411	1.00211	0.344644	1	1.00211	1.00211	1	1	0.719901	1.00211	0.0257909	0.323041	1.00211	1.00211	1	0.604266	0.916626	0.952304
Cluster_adata-TRP4	YOR184W	1	1.00116	0.802513	1	1	0.474431	1	0.319107	1	0.172147	0.283998	1	1	0.692831	0.425302	0.0967513	1	1	1.00116	1.00116	1	0.341266	1	1	0.26102	0.996085	1	0.721466	1	0.238253	0.41384	1.00116	0.501919	1	1.00116	1.00116	0.244561	1	0.554875	1.00116	1	0.480671	1.00116	1.00116	1	0.512401	0.763559	0.728821
Cluster_adata-TUB	YBR162C	1	1.00053	0.904863	1	1	1	1	1	1	1	1	1	1	0.083899	1	1	1	1	1.00053	1.00053	1	0.928462	1	1	0.376787	0.655485	1	0.181641	1	1	0.82511	1.00053	1	1	1.00053	1.00053	1	1	0.765179	1.00053	1	1	1.00053	1.00053	1	0.818238	0.884634	0.300417
Cluster_ADR1	YAL017W	1	1.0019	0.951565	1	1	0.478264	1	0.466967	1	0.353865	0.42124	0.286049	1	0.102808	0.195323	1	1	1	1.0019	1.0019	1	0.172058	1	0.628511	0.817963	0.611251	0.123456	0.00218318	1	0.0703221	0.260213	1.0019	1	1	1.0019	1.0019	1	1	0.759307	1.0019	0.899872	0.657876	1.0019	1.0019	1	0.608051	0.643008	0.786763
Cluster_ARG80	YBR275C	1	1.00105	0.818734	1	0.0811352	0.423701	1	0.294882	1	1	1	1	0.0584386	1	0.128768	1	1	1	1.00105	1.00105	1	0.762882	1	1	0.226248	0.355896	1	0.0581105	1	1	0.841831	1.00105	0.79964	1	1.00105	1.00105	0.225043	1	0.987178	1.00105	0.721386	0.44878	1.00105	1.00105	1	0.179362	0.782526	0.914848
Cluster_ARG81	YDR042C	1	1.00137	0.771024	1	0.104183	1	1	1	1	1	0.326222	1	1	1	0.230674	0.476465	1	1	1.00137	1.00137	1	0.88634	1	0.15099	1	0.986396	0.362389	0.621366	1	1	0.931044	1.00137	0.595734	1	1.00137	1.00137	1	1	0.498486	1.00137	0.0138194	0.539035	1.00137	1.00137	1	0.140583	0.726987	0.310283
Cluster_Arginine	YER069W	1	1.00105	0.818734	1	1	1	1	0.294882	1	1	1	1	1	0.270456	0.749377	1	1	1	1.00105	1.00105	1	0.941339	1	1	0.226248	0.158886	0.292571	0.174668	1	1	0.841831	1.00105	0.450002	1	1.00105	1.00105	1	1	0.90757	1.00105	0.341381	1	1.00105	1.00105	1	0.179362	0.782526	0.676853
Cluster_ARO80	YDR289C	1	1.00074	0.86938	1	1	1	1	1	1	1	0.191477	1	1	0.153862	0.22586	0.29415	1	1	1.00074	1.00074	1	0.86729	1	0.319456	1	0.2813	0.215135	0.144431	1	1	0.912956	1.00074	0.675398	1	1.00074	1.00074	1	1	0.687465	1.00074	0.200939	1	1.00074	1.00074	1	0.780969	0.842289	1
Cluster_ASH1	YBL029W	1	1.00116	0.802513	1	1	0.474431	1	1	1	0.0352046	0.283998	0.18603	1	0.0930948	0.425302	1	1	1	1.00116	1.00116	1	0.985573	1	1	1	0.455138	0.0517667	0.0946538	1	0.00205239	0.87942	1.00116	0.501919	1	1.00116	1.00116	1	1	0.554875	1.00116	0.136301	0.0223568	1.00116	1.00116	1	0.284723	0.972199	0.728821
Cluster_Asparagine	YPR145W	1	1.00021	0.960807	1	1	1	1	1	1	1	1	1	1	1	0.0166734	0.00235044	1	1	1.00021	1.00021	1	0.822527	1	1	0.172309	0.634751	1	0.0983958	1	1	0.502075	1.00021	1	1	1.00021	1.00021	1	1	0.898489	1.00021	1	0.112257	1.00021	1.00021	1	0.754585	0.952158	1
Cluster_Autophagy	YNL223W	1	1.00063	0.886945	1	1	0.599426	1	1	1	1	1	0.00487562	0.0354772	0.117565	0.563992	0.258123	1	1	1.00063	1.00063	1	0.556409	1	0.280978	1	0.446597	1	0.609033	1	1	0.567582	1.00063	0.618774	1	1.00063	1.00063	0.00884508	1	0.725284	1.00063	0.155383	0.300434	1.00063	1.00063	1	0.664848	0.863203	1
Cluster_AZF1	YJL148W	1	1.00074	0.86938	1	1	0.259404	1	1	1	0.392687	0.0169361	0.122744	1	0.528091	1	1	1	1	1.00074	1.00074	1	0.86729	1	1	1	0.017704	1	0.144431	1	1	0.118743	1.00074	1	1	1.00074	1.00074	0.163421	1	0.687465	1.00074	1	0.340891	1.00074	1.00074	1	0.06549	0.842289	0.47286
Cluster_BAS1	YAL044C	1	1.00158	0.740763	1	1	0.647585	1	1	1	0.275956	0.365964	1	1	0.460088	0.00813383	0.0334236	1	1	1.00158	1.00158	1	0.586528	1	1	0.758137	0.0889762	0.0130773	0.00101678	1	1	0.120522	1.00158	0.675639	1	1.00158	1.00158	1	1	0.959926	1.00158	0.552126	0.59085	1.00158	1.00158	1	0.857553	0.692159	0.667317
Cluster_Biotin	YGR286C	1	1.00021	0.960807	1	1	1	1	1	1	1	1	1	1	1	1	1	1	1	1.00021	1.00021	1	0.991348	1	1	1	0.634751	1	1	1	1	0.502075	1.00021	1	1	1.00021	1.00021	1	1	0.898489	1.00021	1	0.112257	1.00021	1.00021	1	0.754585	0.952158	0.388859
Cluster_CAD1	YBL008W	1	1.00116	0.802513	1	1	0.474431	0.0431572	1	1	0.54336	0.283998	1	1	0.692831	1	1	1	1	1.00116	1.00116	0.067362	0.924752	1	1	1	0.996085	1	0.721466	1	1	0.41384	1.00116	0.0151528	1	1.00116	1.00116	1	1	0.554875	1.00116	0.754829	1	1.00116	1.00116	1	0.512401	0.763559	0.203603
Cluster_CBF1	YAL026C	0.188695	1.00127	0.786611	1	1	0.522347	1	1	1	1	1	0.00121628	1	0.724105	0.0584082	0.449726	1	1	1.00127	1.00127	1	0.691021	1	1	1	0.979027	0.339915	0.0486576	1	1	0.261451	1.00127	0.0892543	1	1.00127	1.00127	0.263591	1	0.873308	1.00127	0.784261	0.150125	1.00127	1.00127	1	0.625209	0.745049	0.773509
Cluster_CHA4	YJL148W	1	1.00127	0.977428	1	1	0.522347	1	1	1	1	0.305429	1	1	0.724105	0.0584082	0.449726	1	1	1.00127	1.00127	1	0.691021	1	1	1	0.765378	0.339915	0.14065	1	1	0.490035	1.00127	0.550553	1	1.00127	1.00127	1	1	0.525927	1.00127	1	1	1.00127	1.00127	1	0.815039	0.745049	0.773509
Cluster_CIN5	YAL037W	1	1.00201	0.683742	1	0.148578	0.11934	1	0.485295	1	0.37924	1	1	1	0.303653	0.452534	0.611765	1	1	1.00201	1.00201	1	0.156015	1	1	0.834417	0.827604	1	0.0436943	1	1	0.167285	1.00201	0.308639	1	1.00201	1.00201	1	1	0.36138	1.00201	1	1	1.00201	1.00201	1	0.0896485	0.923785	0.219037
Cluster_CRZ1	YJR001W	1	1.00053	0.904863	1	1	1	1	1	1	1	1	1	1	1	0.49928	1	1	0.00630184	1.00053	1.00053	1	0.928462	1	1	0.376787	0.655485	1	0.499839	1	1	0.82511	1.00053	1	1	1.00053	1.00053	1	1	0.765179	1.00053	1	0.257498	1.00053	1.00053	1	0.970187	0.884634	1
Cluster_CUP9	YPL198W	1	1.00116	0.802513	1	1	0.0576554	0.0431572	0.319107	1	0.54336	0.0410003	1	1	0.692831	0.425302	1	1	1	1.00116	1.00116	1	0.341266	1	1	0.646776	0.455138	0.316652	0.241347	1	0.238253	0.0718801	1.00116	1	1	1.00116	1.00116	0.244561	1	0.554875	1.00116	1	1	1.00116	1.00116	1	0.119155	0.763559	0.442997
Cluster_DAL81	YPR145W	0.145132	1.00095	0.987199	1	1	1	1	1	1	1	1	1	1	1	0.327528	0.361051	1	1	1.00095	1.00095	1	0.798573	1	1	1	0.760002	0.267645	0.302232	1	1	0.793882	1.00095	0.395136	1	1.00095	1.00095	1	1	0.923492	1.00095	1	0.0916484	1.00095	1.00095	1	0.511273	0.981216	0.891048
Cluster_DAL82	YBR003W	1	1.00169	0.726079	1	1	0.912927	0.0621694	1	0.0856972	0.680332	1	1	1	0.820461	0.631262	0.180597	1	1	1.00169	1.00169	1	0.553405	1	0.585264	0.779993	0.458341	1	0.597331	1	1	0.892275	1.00169	0.710513	1	1.00169	1.00169	1	1	0.952531	1.00169	1	0.235583	1.00169	1.00169	1	0.41619	0.675373	0.474532
Cluster_DIG1	YBL016W	1	1.00074	0.86938	1	1	0.656096	1	1	1	1	0.191477	1	1	0.153862	0.22586	0.0419608	1	1	1.00074	1.00074	1	0.86729	1	1	1	0.0919994	1	0.384215	1	1	0.340112	1.00074	0.675398	1	1.00074	1.00074	1	1	0.952197	1.00074	0.200939	0.340891	1.00074	1.00074	1	0.51002	0.842289	0.47286
Cluster_DOT6	YAR007C	1	1.00232	0.643861	1	1	0.83871	1	1	1	0.791677	1	1	1	0.39057	0.554413	0.289688	1	1	1.00232	1.00232	1	0.857655	1	1	0.87539	0.695844	1	0.561905	1	0.419926	0.307351	1.00232	0.859328	1	1.00232	1.00232	1	1	0.680656	1.00232	0.266589	0.730509	1.00232	1.00232	1	0.432844	0.901734	0.18659
Cluster_DrugResistance	YHR064C	1	1.00074	0.86938	1	1	0.259404	1	1	1	1	0.191477	1	1	1	0.22586	0.0419608	1	1	1.00074	1.00074	1	0.504595	1	0.319456	1	0.57057	0.215135	0.384215	1	1	0.340112	1.00074	0.675398	1	1.00074	1.00074	1	1	0.952197	1.00074	1	1	1.00074	1.00074	1	0.234059	0.842289	1
Cluster_Endocytosis	YNL084C	1	1.00084	0.989914	1	1	0.315489	1	1	1	1	0.215668	0.13901	1	0.576117	0.669424	1	1	1	1.00084	1.00084	1	0.457602	1	1	0.530794	0.889072	0.241843	0.77096	1	1	0.733476	1.00084	1	1	1.00084	1.00084	1	1	0.651614	1.00084	1	0.379013	1.00084	1.00084	1	0.8615	0.82188	0.548997
Cluster_FattyAcid	YBR041W	0.35335	1.00264	0.91313	1	1	0.479626	1	0.582795	0.130691	0.831844	0.532251	0.07756	0.139859	0.93176	0.852043	0.712154	1	1	1.00264	1.00264	1	0.975756	1	1	0.906234	0.252677	0.579366	0.930985	1	0.461497	0.899698	1.00264	0.73976	1	1.00264	1.00264	1	1	0.622885	1.00264	0.590907	1	1.00264	1.00264	1	0.0588402	0.87816	0.0752791
Cluster_FHL1	YBL072C	1	1.00616	0.680856	1	1	0.299829	0.207998	1	1	0.206555	7.14054e-06	1	1	0.546176	0.0641863	0.149343	1	1	1.00616	1.00616	0.0517553	0.832221	1	0.824401	0.148405	0.930663	0.134111	0.679799	1	0.762724	0.557967	1.00616	0.645627	1	1.00616	1.00616	0.178845	1	0.642147	1.00616	0.92929	0.0176588	1.00616	1.00616	1	0.37282	0.948553	0.749067
Cluster_FKH1	YBL082C	1	1.00053	0.904863	1	1	1	1	1	1	1	0.140842	1	1	1	0.49928	1	1	1	1.00053	1.00053	1	0.928462	1	0.24033	1	0.309863	1	0.847838	1	1	1	1.00053	0.552282	1	1.00053	1.00053	1	1	0.765179	1.00053	0.472066	1	1.00053	1.00053	1	0.508588	0.884634	0.708084
Cluster_FKH2	YAL024C	1	1.00232	0.643861	1	1	0.965179	1	0.173445	1	0.791677	0.13929	1	1	0.670552	0.554413	0.665698	1	1	1.00232	1.00232	1	0.987025	1	0.701967	0.130995	0.529179	0.533245	0.867266	1	1	0.976611	1.00232	0.654644	1	1.00232	1.00232	0.429501	1	0.30767	1.00232	0.266589	0.365976	1.00232	1.00232	1	0.752443	0.582837	0.343618
Cluster_Flavin	YDR487C	1	1.00053	0.904863	1	1	1	1	0.160248	1	0.299656	1	1	1	1	1	1	1	1	1.00053	1.00053	1	0.613536	1	1	0.376787	0.309863	1	1	1	1	0.460135	1.00053	0.552282	1	1.00053	1.00053	1	1	0.765179	1.00053	0.472066	1	1.00053	1.00053	1	0.818238	0.884634	1
Cluster_Flocculation	YAR050W	1	1.00042	0.923141	1	1	1	1	1	1	1	1	0.0720897	1	1	1	1	1	1	1.00042	1.00042	1	0.676521	1	1	0.314956	0.517236	1	0.778238	1	1	1	1.00042	1	1	1.00042	1.00042	1	1	0.807263	1.00042	1	1	1.00042	1.00042	1	0.694378	0.906595	0.209382
Cluster_FZF1	YJL148W	1	1.00105	0.984206	1	0.0811352	0.423701	1	1	1	0.509614	0.261907	1	1	1	0.377219	1	1	1	1.00105	1.00105	1	0.376325	1	0.422988	0.226248	0.993517	0.292571	0.653065	1	1	0.969447	1.00105	0.450002	1	1.00105	1.00105	1	1	0.585414	1.00105	0.0238084	1	1.00105	1.00105	1	0.835664	0.782526	0.676853
Cluster_GAL4	YBR017C	1	1.00063	0.886945	1	1	1	1	1	1	1	1	1	1	0.117565	1	1	1	1	1.00063	1.00063	1	0.899172	1	1	0.433043	0.446597	1	0.28145	1	1	0.567582	1.00063	1	1	1.00063	1.00063	1	1	0.725284	1.00063	1	1	1.00063	1.00063	1	0.113653	0.863203	0.122476
Cluster_Galactose	YBR018C
Cluster_GAT1	YAL013W	1	1.00137	0.771024	1	1	0.567231	1	0.365095	1	1	0.326222	0.21595	1	0.386993	0.515128	0.128853	1	1	1.00137	1.00137	0.079121	0.655508	1	1	0.707707	0.0918917	1	0.0774955	1	1	0.561729	1.00137	0.595734	1	1.00137	1.00137	1	1	0.498486	1.00137	0.810162	1	1.00137	1.00137	1	0.513436	0.726987	0.310283
Cluster_GAT3	YDL082W	1	1.00042	0.923141	1	1	0.456559	1	1	1	0.247934	0.114352	1	1	0.0539222	0.0836668	1	1	1	1.00042	1.00042	1	0.676521	1	1	1	0.517236	0.129252	0.372559	1	0.0941877	1	1.00042	1	1	1.00042	1.00042	1	1	0.984842	1.00042	0.0730572	1	1.00042	1.00042	1	0.939797	0.906595	0.626551
Cluster_GCN4	YBR043C	1	1.00222	0.656891	1	1	0.95943	0.0808135	0.00513143	1	0.171869	0.129059	1	1	0.158588	0.521682	0.648607	1	1	1.00222	1.00222	1	0.689924	1	1	0.00178364	0.635239	1	0.18248	1	0.405371	0.615956	1.00222	0.380719	1	1.00222	1.00222	1	1	0.906745	1.00222	0.9318	0.713939	1.00222	1.00222	1	0.0147027	0.597333	0.300792
Cluster_GCR1	YDR240C	1	1.00042	0.923141	1	1	1	1	1	1	1	1	1	0.0237911	0.348875	0.0836668	0.180472	1	1	1.00042	1.00042	0.0250314	0.676521	1	1	1	0.517236	0.129252	0.372559	1	1	0.338331	1.00042	0.474201	1	1.00042	1.00042	1	0.0117405	0.807263	1.00042	1	1	1.00042	1.00042	1	0.319362	0.906595	0.626551
Cluster_GCR2	YDR240C	1	1.00084	0.852161	1	1	0.315489	1	1	1	1	1	1	1	0.576117	0.0730027	1	1	1	1.00084	1.00084	0.0494463	0.83355	1	1	1	0.395734	0.241843	0.482962	1	1	0.433851	1.00084	0.723616	1	1.00084	1.00084	1	1	0.93842	1.00084	1	1	1.00084	1.00084	1	0.64675	0.82188	0.244449
Cluster_GeneralTFs	YKL058W	1	1.00243	0.631088	1	1	0.0950634	0.0881697	1	1	1	0.0300956	1	0.129416	0.200705	0.345386	0.307939	1	1	1.00243	1.00243	1	0.354993	1	0.031853	1	0.074683	0.183265	0.0729444	1	1	0.851718	1.00243	0.975284	1	1.00243	1.00243	1	1	0.2916	1.00243	0.132919	0.74612	1.00243	1.00243	1	0.677468	0.894028	0.772246
Cluster_GLN3	YJL148W	1	1.00169	0.726079	1	1	0.683099	1	0.102741	1	0.680332	0.384951	1	1	0.217914	0.342243	0.549151	1	1	1.00169	1.00169	1	0.81839	1	1	0.430307	0.13395	0.425335	0.208997	1	0.326957	0.971091	1.00169	0.710513	1	1.00169	1.00169	1	1	0.424443	1.00169	0.870668	0.235583	1.00169	1.00169	1	0.11173	0.943946	0.711806
Cluster_Glutamate	YOR375C	1	1.00042	0.923141	1	1	1	1	0.130391	1	0.0257926	1	1	1	0.348875	0.0836668	0.0132103	1	1	1.00042	1.00042	1	0.954294	1	1	0.314956	0.517236	1	0.372559	1	1	0.752115	1.00042	1	1	1.00042	1.00042	1	1	0.807263	1.00042	1	1	1.00042	1.00042	1	0.694378	0.906595	0.626551
Cluster_Glutathione	YPR035W	1	1.00053	0.904863	1	1	1	1	0.160248	1	1	1	1	1	1	0.49928	0.220262	1	1	1.00053	1.00053	1	0.928462	1	1	0.376787	1	1	0.499839	1	1	0.460135	1.00053	1	1	1.00053	1.00053	1	1	0.765179	1.00053	1	1	1.00053	1.00053	1	0.508588	0.884634	0.300417
Cluster_Glycerol	YIL053W	0.0834121	1.00053	0.904863	1	1	0.149096	1	1	1	1	1	1	1	0.415119	0.0175628	0.220262	1	1	1.00053	1.00053	1	0.613536	1	0.24033	1	0.655485	1	0.181641	1	1	0.460135	1.00053	1	1	1.00053	1.00053	1	1	0.765179	1.00053	1	1	1.00053	1.00053	1	0.970187	0.884634	0.708084
Cluster_Glycogen	YOR178C	1	1.00032	0.941787	1	1	1	1	1	1	0.192399	1	1	1	1	1	1	1	1	1.00032	1.00032	1	0.745964	1	1	1	0.779281	1	0.676818	1	1	0.648669	1.00032	0.382514	1	1.00032	1.00032	0.073606	1	0.851658	1.00032	1	1	1.00032	1.00032	1	0.50687	0.929098	0.12206
Cluster_GTS1	YBR273C	0.25645	1.00179	0.711685	1	1	0.925258	0.0659274	0.1139	1	0.328134	1	0.0386863	0.0973357	0.83875	0.168012	0.571068	1	1	1.00179	1.00179	1	0.52136	1	0.229789	0.193569	0.724033	0.444908	0.264522	1	0.343423	0.915497	1.00179	0.472944	1	1.00179	1.00179	0.35181	1	0.402288	1.00179	0.622124	1	1.00179	1.00179	1	0.977657	0.93746	0.526325
Cluster_HAL9	YER001W	1	1.00084	0.852161	1	1	0.315489	1	0.243825	1	1	0.0221399	1	1	0.576117	1	1	1	1	1.00084	1.00084	1	0.457602	1	1	0.530794	0.166866	1	0.482962	1	1	0.183881	1.00084	1	1	1.00084	1.00084	0.015971	1	0.651614	1.00084	0.640207	1	1.00084	1.00084	1	0.8615	0.82188	0.548997
Cluster_HAP2	YJL148W	1	1.00148	0.755743	0.039093	1	0.316732	1	1	0.0753926	0.249726	1	1	1	1	0.855975	1	1	1	1.00148	1.00148	1	0.620613	1	0.536994	0.734114	0.295451	1	0.460753	1	0.292782	0.828092	1.00148	0.894728	1	1.00148	1.00148	1	1	0.472473	1.00148	0.832956	1	1.00148	1.00148	1	0.915843	0.956134	0.617995
Cluster_HAP3	YBR039W	1	1.00137	0.973667	0.0363502	1	0.862341	1	1	0.0701976	0.223574	1	1	1	0.752197	0.515128	1	1	1	1.00137	1.00137	1	0.655508	1	1	0.707707	0.0918917	0.362389	0.0774955	1	0.0388067	0.931044	1.00137	0.876349	1	1.00137	1.00137	0.282143	1	0.85522	1.00137	0.810162	1	1.00137	1.00137	1	0.721014	0.726987	0.959355
Cluster_HAP4	YBL045C	1	1.00201	0.999544	1	0.148578	0.516033	1	0.485295	1	0.138184	0.0179706	1	1	1	0.927962	1	1	1	1.00201	1.00201	1	0.998907	1	0.648415	0.52178	0.496483	1	0.892248	1	0.0104364	0.855483	1.00201	0.551228	1	1.00201	1.00201	0.384076	1	0.997619	1.00201	1	1	1.00201	1.00201	1	0.991419	0.999025	0.621621
Cluster_HAP5	YBR039W	1	1.00158	0.740763	0.0418283	0.119229	0.898562	1	0.407986	0.0805591	0.275956	0.365964	1	1	0.8001	0.595134	1	1	1	1.00158	1.00158	1	0.586528	1	0.189826	0.14755	0.376592	1	0.531304	1	0.0506049	0.863473	1.00158	0.675639	1	1.00158	1.00158	1	1	0.447816	1.00158	0.853016	1	1.00158	1.00158	1	0.514397	0.692159	0.667317
Cluster_Heme	YDR232W	1	1.00084	0.999603	1	1	0.704754	0.0315703	1	1	1	0.215668	1	1	0.191908	0.669424	1	1	1	1.00084	1.00084	1	0.83355	1	1	1	0.982232	0.241843	0.219635	1	1	0.433851	1.00084	0.723616	1	1.00084	1.00084	1	1	0.93842	1.00084	0.247721	1	1.00084	1.00084	1	0.64675	0.985155	1
Cluster_HIR1	YAR002W	1	1.00095	0.835281	1	1	0.122846	1	1	1	0.123189	0.239137	1	1	1	0.0993084	0.361051	1	1	1.00095	1.00095	1	0.955968	1	1	0.573161	0.506409	1	0.573327	1	1	0.522056	1.00095	0.395136	1	1.00095	1.00095	1	1	0.923492	1.00095	0.0830106	0.414933	1.00095	1.00095	1	0.511273	0.981216	0.617024
Cluster_HIR2	YBR010W	1	1.00084	0.852161	1	1	0.315489	1	1	1	1	1	1	1	0.576117	1	1	1	1	1.00084	1.00084	1	0.968509	1	1	1	0.395734	1	1	1	1	1	1.00084	0.723616	0.00923006	1.00084	1.00084	1	1	0.651614	1.00084	0.640207	0.379013	1.00084	1.00084	1	0.15052	0.82188	0.860601
Cluster_Histidine	YER055C	1	1.00063	0.994454	1	1	0.599426	1	1	1	0.347826	0.166542	1	1	0.47463	1	1	1	1	1.00063	1.00063	1	0.556409	1	1	0.433043	1	1	0.895599	1	0.137914	0.567582	1.00063	0.219817	1	1.00063	1.00063	1	1	0.725284	1.00063	1	1	1.00063	1.00063	1	0.664848	0.863203	1
Cluster_HMS1	YBR133C	1	1.00084	0.852161	1	1	0.704754	1	0.243825	0.0437901	1	1	1	1	0.576117	0.669424	1	1	1	1.00084	1.00084	1	0.83355	1	1	0.0290126	0.395734	1	0.482962	1	1	0.433851	1.00084	1	1	1.00084	1.00084	0.184485	1	0.651614	1.00084	0.247721	1	1.00084	1.00084	1	0.64675	0.985155	0.244449
Cluster_HSF1	YAL003W	0.0174543	1.00127	0.786611	1	1	0.839641	1	0.342502	1	0.197656	1	1	1	0.34882	1	1	1	1	1.00127	1.00127	1	0.691021	1	0.483119	0.295822	0.911931	1	0.989119	1	1	0.261451	1.00127	0.0228538	1	1.00127	1.00127	1	1	0.525927	1.00127	1	1	1.00127	1.00127	1	0.0773972	0.745049	0.773509
Cluster_IME4	YAL018C	0.145132	1.00095	0.987199	1	1	0.37053	1	0.269798	0.0491298	0.473377	1	1	1	1	0.0993084	1	1	1	1.00095	1.00095	1	0.798573	1	0.390354	0.191854	0.506409	0.267645	0.116389	1	0.199594	0.956685	1.00095	0.764676	1	1.00095	1.00095	1	1	0.617629	1.00095	0.294782	1	1.00095	1.00095	1	0.981764	0.801963	0.617024
Cluster_INO2	YBR029C	1	1.00158	0.740763	1	1	0.151458	1	1	1	0.0792293	1	0.244775	1	0.8001	0.874606	0.526116	1	1	1.00158	1.00158	1	0.842164	1	1	1	0.58323	1	0.531304	1	0.31008	0.863473	1.00158	0.388959	1	1.00158	1.00158	0.317862	1	0.817675	1.00158	1	1	1.00158	1.00158	1	0.316185	0.692159	0.214171
Cluster_INO4	YAL054C	1	1.00211	0.670183	1	1	0.141584	1	1	1	0.154738	0.455396	0.312312	1	0.883187	0.487677	0.0701229	1	1	1.00211	1.00211	1	0.967173	1	1	1	0.568383	1	0.635072	1	0.0846238	0.745517	1.00211	0.95993	1	1.00211	1.00211	0.399604	1	0.34251	1.00211	0.922486	0.696353	1.00211	1.00211	1	0.264885	0.612187	0.125645
Cluster_InvasiveGrowth	YPL049C	1	1.00011	0.980208	1	1	1	1	1	1	1	1	1	1	1	1	1	1	1	1.00011	1.00011	1	0.906938	1	1	1	0.395621	1	1	1	1	1	1.00011	1	1	1.00011	1.00011	1	1	0.947889	1.00011	0.119907	1	1.00011	1.00011	1	0.504579	0.975787	0.218233
Cluster_Isoleucine	YJR148W	1	1.00063	0.886945	1	1	1	1	0.0160727	1	0.347826	1	1	1	1	1	1	1	1	1.00063	1.00063	1	0.987042	1	1	0.000850857	0.759929	1	0.895599	1	1	1	1.00063	1	1	1.00063	1.00063	1	1	0.725284	1.00063	1	0.300434	1.00063	1.00063	1	0.352328	0.863203	0.771824
Cluster_IXR1	YDR472W	1	1.00053	0.904863	1	1	1	1	1	1	0.299656	0.140842	1	0.0296514	0.415119	0.127736	0.220262	1	1	1.00053	1.00053	1	0.613536	1	0.24033	0.376787	0.919416	1	0.499839	1	0.11632	0.460135	1.00053	1	1	1.00053	1.00053	1	0.0146548	0.765179	1.00053	0.472066	1	1.00053	1.00053	1	0.970187	0.884634	0.708084
Cluster_LEU3	YOR001W	1	1.00105	0.818734	1	1	1	1	0.294882	1	0.147248	0.261907	1	1	0.270456	0.749377	1	1	1	1.00105	1.00105	1	0.762882	1	1	0.00101229	0.951016	1	0.387274	1	1	0.841831	1.00105	0.79964	1	1.00105	1.00105	1	1	0.585414	1.00105	0.721386	1	1.00105	1.00105	1	0.835664	0.782526	0.377708
Cluster_Leucine	YNL104C	1	1.00042	0.923141	1	1	1	1	1	1	1	0.114352	1	1	0.348875	1	1	1	1	1.00042	1.00042	1	0.676521	1	1	0.314956	0.86663	1	0.372559	1	1	0.338331	1.00042	0.474201	1	1.00042	1.00042	1	1	0.807263	1.00042	0.400104	0.211932	1.00042	1.00042	1	0.319362	0.906595	0.626551
Cluster_Lysine	YGL154C	1	1.00063	0.999854	1	1	0.599426	1	0.0160727	1	1	0.012339	1	1	0.47463	0.563992	1	1	1	1.00063	1.00063	1	0.987042	1	1	0.0955075	0.446597	1	0.28145	1	1	0.567582	1.00063	1	1	1.00063	1.00063	1	1	0.9999	1.00063	0.535403	1	1.00063	1.00063	1	0.664848	0.999995	1
Cluster_MAC1	YJL148W	1	1.00105	0.818734	1	1	1	1	1	1	0.509614	0.261907	1	1	0.270456	1	1	1	1	1.00105	1.00105	1	0.762882	1	1	1	0.158886	1	0.976875	1	1	0.969447	1.00105	1	1	1.00105	1.00105	1	0.0291025	0.585414	1.00105	1	1	1.00105	1.00105	1	0.634333	0.782526	0.676853
Cluster_MAL13	YGR060W	1	1.00148	0.755743	1	1	0.124267	1	0.386914	1	1	0.346394	1	1	0.0464098	0.855975	1	1	1	1.00148	1.00148	1	0.620613	1	1	0.364418	0.500575	1	0.864387	1	1	0.828092	1.00148	0.894728	1	1.00148	1.00148	0.300229	1	0.472473	1.00148	0.832956	1	1.00148	1.00148	1	0.973567	0.70936	0.36563
Cluster_MAL33	YAL013W	1	1.00179	0.956391	1	1	0.925258	1	0.447988	1	0.702344	1	1	1	1	0.379578	0.571068	1	1	1.00179	1.00179	1	0.983467	1	0.607481	0.799875	0.345397	1	0.452329	1	0.343423	0.978503	1.00179	0.742189	1	1.00179	1.00179	1	1	0.944519	1.00179	0.334027	0.0713433	1.00179	1.00179	1	0.994308	0.93746	0.526325
Cluster_Maltose	YBR299W	1	1.00021	0.960807	1	1	1	1	1	1	1	1	1	1	1	1	1	1	1	1.00021	1.00021	1	0.991348	1	1	1	0.634751	1	1	1	1	1	1.00021	1	1	1.00021	1.00021	1	1	0.898489	1.00021	0.225448	1	1.00021	1.00021	1	0.254574	0.952158	1
Cluster_ManualAFT1targets	YOR316C	1	1.00021	0.960807	1	1	0.26279	1	1	1	1	1	1	1	0.193058	1	1	1	1	1.00021	1.00021	1	0.822527	1	0.104104	1	0.634751	1	0.529039	1	1	0.502075	1.00021	1	1	1.00021	1.00021	1	1	0.898489	1.00021	0.225448	1	1.00021	1.00021	1	1	0.952158	0.388859
Cluster_ManualG1genes	YIL026C	1	1.00328	0.537578	1	1	0.991204	1	0.28813	1	0.359952	0.0642476	0.440488	1	0.964213	0.783005	0.448113	1	1	1.00328	1.00328	1	0.201903	1	1	0.539085	0.204375	1	0.373865	1	0.535949	0.587083	1.00328	0.695964	1	1.00328	1.00328	1	1	0.782333	1.00328	2.65542e-18	0.542089	1.00328	1.00328	1	0.379251	0.467171	0.930692
Cluster_ManualHAP1targets	YLR153C	0.437688	1.00349	0.861735	1	1	0.508644	0.124099	1	1	0.672912	0.25919	1	1	0.971143	0.938897	0.8069	1	1	1.00349	1.00349	1	0.99079	1	0.533353	0.956096	0.573601	0.681331	0.930823	1	0.558413	0.372902	1.00349	0.966592	1	1.00349	1.00349	0.569307	1	0.754271	1.00349	0.774528	0.0393149	1.00349	1.00349	0.0103871	0.77325	0.955141	0.0402425
Cluster_ManualMethionine	YJR139C	1	1.00211	0.941371	1	1	0.952733	1	0.502995	0.10597	1	1	0.312312	1	1	0.937286	1	1	1	1.00211	1.00211	1	0.432432	1	1	0.55001	0.737331	0.49973	0.142012	1	1	0.882975	1.00211	1	1	1.00211	1.00211	0.399604	1	0.719901	1.00211	0.922486	0.105457	1.00211	1.00211	1	0.140337	0.988219	0.125645
Cluster_ManualM-G1genes	YOR099W	1	1.00021	0.960807	1	1	1	1	1	1	1	1	1	1	1	1	1	1	1	1.00021	1.00021	1	0.822527	1	1	1	1	1	1	1	1	1	1.00021	1	1	1.00021	1.00021	1	1	0.898489	1.00021	1	1	1.00021	1.00021	1	0.754585	0.952158	1
Cluster_ManualYap1Targets	YDL131W	1	1.00296	0.982624	1	1	0.77825	1	0.0697375	1	0.582888	0.203575	1	1	0.552769	0.291029	1	1	1	1.00296	1.00296	1	0.73941	1	0.785876	0.242729	0.987551	0.068219	0.238205	1	0.500101	0.446168	1.00296	0.807317	1	1.00296	1.00296	1	1	0.944655	1.00296	0.865683	1	1.00296	1.00296	1	0.593927	0.970602	0.00327572
Cluster_ManualZAP1targets	YDR284C	1	1.00148	0.755743	1	1	0.881831	1	0.386914	1	0.631312	0.346394	0.230497	1	0.777432	0.855975	1	1	1	1.00148	1.00148	1	0.620613	1	1	0.734114	0.500575	0.384099	0.68561	1	0.292782	0.828092	1.00148	0.0448036	1	1.00148	1.00148	1	1	0.472473	1.00148	0.832956	0.192218	1.00148	1.00148	1	0.798134	0.70936	0.843886
Cluster_ManualZAP1targets-2	YDR284C	0.139402	1.00402	0.467143	1	1	0.639699	1	0.376703	1	0.746514	0.685174	0.509377	1	0.910377	0.741578	0.556788	1	1	1.00402	1.00402	1	0.299985	1	0.610733	0.255519	0.799046	0.732123	0.285229	1	0.237393	0.202348	1.00402	0.330867	1	1.00402	1.00402	1	1	0.403697	1.00402	0.485431	0.377869	1.00402	1.00402	0.0119546	0.994167	0.393269	0.939983
Cluster_MATa1	YAL022C	1	1.00095	0.987199	1	1	0.746532	1	1	0.0491298	1	1	1	1	0.61926	0.712161	1	1	1	1.00095	1.00095	1	0.798573	1	0.390354	0.191854	0.760002	0.267645	0.302232	1	1	0.956685	1.00095	0.137436	1	1.00095	1.00095	1	1	0.923492	1.00095	0.0830106	0.414933	1.00095	1.00095	1	0.511273	0.801963	1
Cluster_Mating	YNR044W	1	1.00084	0.852161	1	1	1	1	1	1	0.434467	0.215668	1	1	1	0.669424	1	1	1	1.00084	1.00084	1	0.457602	1	0.355877	1	0.675471	1	0.482962	1	1	0.433851	1.00084	0.723616	1	1.00084	1.00084	1	1	0.651614	1.00084	0.640207	0.379013	1.00084	1.00084	1	0.64675	0.82188	0.860601
Cluster_MBP1	YAL062W	1	1.00179	0.711685	1	1	0.439165	1	0.447988	1	0.702344	1	1	1	0.527836	0.66482	1	1	1	1.00179	1.00179	1	0.793744	1	0.607481	0.799875	0.866505	1	0.452329	1	1	0.915497	1.00179	0.0950741	1	1.00179	1.00179	1	1	0.778929	1.00179	4.37834e-07	0.63685	1.00179	1.00179	1	0.699098	0.93746	0.526325
Cluster_MCM1	YAL040C	0.174425	1.00116	0.802513	1	1	0.813199	0.0431572	1	1	1	0.283998	1	1	0.692831	0.425302	0.421624	1	1	1.00116	1.00116	1	0.341266	1	1	1	0.455138	0.316652	0.0276577	1	1	0.97845	1.00116	0.0671208	1	1.00116	1.00116	1	1	0.554875	1.00116	0.136301	0.480671	1.00116	1.00116	1	0.892648	0.763559	0.442997
Cluster_MET31	YAL012W	1	1.00095	0.835281	1	1	0.746532	1	0.269798	0.0491298	1	0.0279105	0.154976	1	0.230973	0.712161	1	1	1	1.00095	1.00095	1	0.41498	1	0.390354	0.191854	0.506409	0.267645	0.116389	1	1	0.257442	1.00095	0.764676	1	1.00095	1.00095	1	1	0.923492	1.00095	1	1	1.00095	1.00095	1	0.0943292	0.801963	0.310903
Cluster_MET4	YPR145W	1	1.00137	0.771024	1	1	0.567231	1	1	1	1	1	0.21595	1	1	0.515128	0.476465	1	1	1.00137	1.00137	1	0.88634	1	1	0.707707	0.634864	0.362389	0.38733	1	1	0.561729	1.00137	0.595734	1	1.00137	1.00137	0.282143	1	0.498486	1.00137	0.198067	0.170954	1.00137	1.00137	1	0.140583	0.726987	0.0444718
Cluster_MIG1	YAL011W	1	1.00169	0.726079	1	1	1	1	1	1	0.680332	0.0811698	1	1	0.820461	0.0116147	0.549151	1	1	1.00169	1.00169	1	0.209254	1	0.585264	0.779993	0.824601	0.425335	0.0340987	1	1	0.738665	1.00169	0.923702	1	1.00169	1.00169	1	1	0.424443	1.00169	0.299396	0.614535	1.00169	1.00169	1	0.11173	0.675373	0.474532
Cluster_Mitochondria	YNL064C	1	1.00275	0.594263	1	0.197633	0.732586	1	0.223895	1	0.263697	0.0413956	0.385472	1	0.501351	0.867132	0.361993	1	1	1.00275	1.00275	1	0.911942	1	0.408728	0.694186	0.0467636	1	0.599558	1	0.131825	0.681719	1.00275	0.552824	1	1.00275	1.00275	0.484918	1	0.604064	1.00275	0.964049	0.787744	1.00275	1.00275	1	0.987242	0.528276	0.944498
Cluster_MitochondrialRPs	YBL090W	1	1.00296	0.982624	1	1	0.362023	1	1	1	0.582888	0.203575	1	1	0.793428	0.720193	1	1	1	1.00296	1.00296	1	0.250879	1	1	0.732939	0.430028	1	0.914118	1	0.500101	0.293811	1.00296	0.614279	1	1.00296	1.00296	0.510582	1	0.822968	1.00296	0.865683	0.811634	1.00296	1.00296	1	0.984291	0.502933	0.88925
Cluster_MOT3	YBR083W	1	1.00095	0.835281	1	1	0.0277533	1	1	1	0.473377	1	0.154976	1	0.61926	0.327528	1	1	1	1.00095	1.00095	1	0.41498	1	1	1	0.925949	0.267645	0.302232	1	0.199594	0.257442	1.00095	0.137436	1	1.00095	1.00095	1	1	0.990668	1.00095	0.0830106	1	1.00095	1.00095	1	0.511273	0.981216	0.310903
Cluster_mRNAprocessing	YDR228C	0.303222	1.00681	0.962362	1	0.419054	0.419193	1	0.377384	1	0.940588	1.76928e-05	0.699094	0.00658829	0.901983	0.447175	0.198345	1	1	1.00681	1.00681	0.334283	0.141371	1	0.44939	0.217032	0.676989	0.891564	0.555542	1	1	0.73627	1.00681	0.753056	1	1.00681	1.00681	0.481529	1	0.759986	1.00681	0.0757507	0.978142	1.00681	1.00681	1	0.986637	0.930973	0.769198
Cluster_MSS11	YPR001W	1	1.00116	0.802513	1	1	0.474431	1	0.319107	1	0.54336	1	1	1	0.30987	0.0432365	0.0967513	1	1	1.00116	1.00116	1	0.924752	1	1	0.0697727	0.455138	0.316652	0.0946538	1	0.238253	0.672678	1.00116	0.501919	1	1.00116	1.00116	1	1	0.890798	1.00116	0.386955	0.129863	1.00116	1.00116	1	0.284723	0.763559	0.728821
Cluster_MTH1	YAL020C	1	1.00105	0.818734	1	1	0.423701	1	1	1	1	0.261907	0.170648	1	1	0.377219	0.0817047	1	1	1.00105	1.00105	1	0.376325	1	1	0.611707	0.355896	1	0.653065	1	1	0.969447	1.00105	0.450002	1	1.00105	1.00105	0.225043	1	0.90757	1.00105	0.721386	0.44878	1.00105	1.00105	1	0.179362	0.97689	0.676853
Cluster_NDD1	YJL148W	0.216504	1.00148	0.755743	1	1	0.881831	1	0.386914	1	1	0.346394	1	1	1	0.267407	0.501908	1	1	1.00148	1.00148	1	0.620613	1	0.536994	0.734114	0.142056	0.384099	0.114267	1	1	0.99244	1.00148	0.142227	1	1.00148	1.00148	1	1	0.472473	1.00148	0.513838	1	1.00148	1.00148	1	0.973567	0.70936	0.0638406
Cluster_NRG1	YAL022C	1	1.00063	0.994454	1	1	0.000297238	1	1	1	0.000296841	1	1	1	0.47463	0.0317783	0.258123	1	1	1.00063	1.00063	1	0.899172	1	1	1	1	0.0157912	0.0818308	1	0.00835006	0.24524	1.00063	0.618774	1	1.00063	1.00063	1	1	0.725284	1.00063	0.535403	1	1.00063	1.00063	1	0.664848	0.863203	0.122476
Cluster_NuclearProteinTargetting	YIL063C	1	1.00275	0.907074	1	1	0.981106	1	1	1	1	0.546273	0.385472	1	1	0.109458	0.361993	1	1	1.00275	1.00275	1	0.559186	1	1	0.079303	0.0994673	1	0.0813798	1	1	0.681719	1.00275	0.552824	0.0297152	1.00275	1.00275	0.484918	1	0.604064	1.00275	0.0295611	1	1.00275	1.00275	1	0.966111	0.87002	0.333719
Cluster_PDR1	YBR040W	1	1.00053	0.904863	1	1	0.533425	1	1	1	1	0.140842	1	1	0.415119	0.49928	1	1	1	1.00053	1.00053	1	0.613536	1	1	1	0.919416	0.158873	0.847838	1	1	0.82511	1.00053	0.161878	1	1.00053	1.00053	1	1	0.765179	1.00053	1	1	1.00053	1.00053	1	0.970187	0.884634	0.300417
Cluster_PentosePhosphate	YGR256W	1	1.00074	0.86938	1	1	0.656096	1	0.21693	1	1	1	1	1	0.153862	0.620348	1	1	1	1.00074	1.00074	1	0.86729	1	1	0.484226	0.835672	1	0.69896	1	1	0.340112	1.00074	0.279033	1	1.00074	1.00074	0.163421	1	0.952197	1.00074	1	0.340891	1.00074	1.00074	1	0.06549	0.842289	0.0448361
Cluster_Peroxisome	YLR191W	1	1.00095	0.835281	1	1	0.122846	1	1	1	0.473377	0.239137	1	1	0.61926	0.327528	0.361051	1	1	1.00095	1.00095	1	0.798573	1	1	1	0.0944463	1	0.116389	1	0.199594	0.956685	1.00095	0.764676	1	1.00095	1.00095	1	1	0.617629	1.00095	0.683385	1	1.00095	1.00095	0.00284001	0.262902	0.981216	0.891048
Cluster_PHD1	YBR158W	1	1.00137	0.771024	1	1	0.567231	1	1	1	0.223574	1	1	1	0.138866	0.834577	1	1	1	1.00137	1.00137	1	0.655508	1	1	1	0.218754	0.362389	0.194783	1	0.275051	0.328723	1.00137	0.302058	1	1.00137	1.00137	1	1	0.498486	1.00137	0.810162	0.170954	1.00137	1.00137	0.00410051	0.957074	0.726987	0.133317
Cluster_PHO4	YCL035C	1	1.00032	0.941787	1	1	1	1	1	1	1	1	1	1	0.275137	1	1	1	1	1.00032	1.00032	0.0188319	0.745964	1	1	1	0.34569	1	0.676818	1	1	0.648669	1.00032	0.382514	1	1.00032	1.00032	1	1	0.851658	1.00032	0.318342	1	1.00032	1.00032	1	0.878442	0.929098	1
Cluster_Phospholipid	YDR497C	1	1.00211	0.670183	1	1	0.552278	1	0.502995	1	0.404184	0.455396	1	1	0.883187	0.750809	0.630644	1	1	1.00211	1.00211	0.11914	0.992087	1	0.667256	0.267713	0.0518223	1	0.635072	1	0.390452	0.882975	1.00211	0.819907	1	1.00211	1.00211	1	1	0.34251	1.00211	0.710787	1	1.00211	1.00211	1	0.761532	0.612187	0.664442
Cluster_Polyamine	YKL184W	1	1.00021	0.960807	1	1	0.26279	1	1	1	1	1	1	1	1	1	1	1	1	1.00021	1.00021	1	0.991348	1	1	1	0.15649	1	1	1	1	1	1.00021	0.274853	1	1.00021	1.00021	1	1	0.898489	1.00021	0.225448	1	1.00021	1.00021	1	0.754585	0.952158	1
Cluster_primig-EarlySpo	YML102C-a	1	1.00243	0.631088	1	1	0.650667	1	0.552535	1	0.806031	0.502899	1	1	0.694504	0.345386	1	1	1	1.00243	1.00243	1	0.354993	1	0.717942	0.627486	0.867433	0.549153	0.0729444	1	1	0.851718	1.00243	0.875926	1	1.00243	1.00243	0.443888	1	0.661214	1.00243	0.29473	0.74612	1.00243	1.00243	1	0.214872	0.894028	0.585329
Cluster_primig-LateSpo	YPR077C	1	1.00541	0.920322	1	0.351103	0.74628	1	0.526792	1	0.973806	0.19519	0.615706	0.264914	0.602898	0.805825	0.715986	1	0.0625941	1.00541	1.00541	1	0.479051	1	0.765505	0.310743	0.0187014	0.521773	0.669344	1	0.717603	0.317561	1.00541	0.788772	1	1.00541	1.00541	0.368735	1	0.499283	1.00541	0.263265	0.340533	1.00541	1.00541	1	0.526273	0.874418	0.812684
Cluster_primig-MidSpo	YOR161C	1	1.00211	0.670183	1	1	0.796708	1	0.502995	1	0.759708	1	0.312312	0.113519	1	0.937286	1	1	1	1.00211	1.00211	1	0.998452	1	0.0881924	0.267713	0.118914	1	0.973344	1	1	0.561888	1.00211	0.164622	1	1.00211	1.00211	1	1	0.916996	1.00211	0.436431	0.323041	1.00211	1.00211	1	0.140337	0.916626	0.450338
Cluster_Proline	YER023W	1	1.00032	0.941787	1	1	0.367041	1	1	1	1	1	1	1	1	0.339645	1	1	1	1.00032	1.00032	1	0.745964	1	1	1	1	1	0.676818	1	1	0.648669	1.00032	1	1	1.00032	1.00032	1	1	0.851658	1.00032	1	1	1.00032	1.00032	1	0.878442	0.929098	0.522259
Cluster_Proteasome	YBL041W	1	1.00296	0.570909	1	1	0.5732	1	0.624402	1	0.582888	0.00909472	0.408096	1	0.552769	0.97932	1	1	1	1.00296	1.00296	1	0.886845	1	0.785876	0.469375	0.725956	0.620943	0.989364	1	1	0.946318	1.00296	0.934884	1	1.00296	1.00296	0.510582	1	0.986324	1.00296	0.239619	1	1.00296	1.00296	1	0.915652	0.853386	0.998997
Cluster_Purine	YMR120C	1	1.00158	0.740763	1	1	0.898562	1	0.407986	1	0.275956	0.365964	1	1	0.460088	0.595134	0.162984	1	1	1.00158	1.00158	1	0.586528	1	1	0.0401216	0.202719	1	0.158446	1	1	0.0448358	1.00158	0.675639	1	1.00158	1.00158	1	1	0.817675	1.00158	0.26497	1	1.00158	1.00158	1	0.709005	0.692159	0.214171
Cluster_PUT3	YOR272W	1	1.00148	0.969672	1	1	0.881831	1	1	1	0.631312	0.346394	0.230497	1	0.424145	0.267407	0.14571	1	1	1.00148	1.00148	1	0.864878	1	0.170221	0.364418	0.142056	0.384099	0.68561	1	1	0.627499	1.00148	0.345648	1	1.00148	1.00148	0.300229	1	0.995201	1.00148	0.513838	1	1.00148	1.00148	1	0.798134	0.956134	0.843886
Cluster_Pyrimidine	YJL130C	1	1.00148	0.969672	1	1	0.60898	1	1	1	0.631312	0.346394	1	0.0808627	0.777432	0.556414	1	1	1	1.00148	1.00148	1	0.965037	1	0.536994	1	0.500575	0.0801484	0.68561	1	1	0.0852019	1.00148	1	1	1.00148	1.00148	1	1	0.472473	1.00148	0.231074	1	1.00148	1.00148	1	0.798134	0.70936	0.0638406
Cluster_RAP1	YAL033W	1	1.00158	0.965455	1	1	0.647585	0.0583966	1	1	0.656694	0.365964	1	1	1	0.118105	0.162984	1	1	1.00158	1.00158	0.090734	0.230764	1	1	1	0.772589	0.405073	0.319651	1	1	0.863473	1.00158	0.675639	1	1.00158	1.00158	0.317862	1	0.817675	1.00158	0.853016	0.213797	1.00158	1.00158	1	0.316185	0.692159	0.667317
Cluster_RCS1	YFR001W	1	1.00053	0.904863	1	1	1	1	0.160248	1	0.0410466	1	1	1	1	0.49928	1	1	1	1.00053	1.00053	1	0.928462	1	1	0.376787	0.919416	1	0.847838	1	0.11632	0.82511	1.00053	1	1	1.00053	1.00053	1	1	0.975603	1.00053	1	0.257498	1.00053	1.00053	1	0.818238	0.884634	0.708084
Cluster_REB1	YCR032W	1	1.00222	0.992196	0.0580834	0.162888	0.95943	1	1	1	0.428639	1	1	1	0.645099	0.0448234	0.0169741	1	1	1.00222	1.00222	1	0.874843	1	0.0989893	1	0.163541	0.516777	0.325605	1	1	0.905792	1.00222	0.840721	1	1.00222	1.00222	1	1	0.906745	1.00222	0.736202	0.713939	1.00222	1.00222	1	0.683638	0.986497	0.961149
Cluster_RFX1	YBR042C	1	1.00105	0.818734	1	1	0.782402	1	1	1	1	1	1	1	1	0.749377	1	1	1	1.00105	1.00105	1	0.376325	1	1	0.611707	0.355896	0.292571	0.871016	1	1	0.602086	1.00105	1	1	1.00105	1.00105	1	1	0.585414	1.00105	1	0.44878	1.00105	1.00105	1	0.388213	0.97689	0.914848
Cluster_RGM1	YCR105W	1	1.00084	0.852161	1	1	0.704754	1	1	1	0.434467	0.215668	1	1	0.0397248	0.276813	1	1	1	1.00084	1.00084	1	0.457602	1	0.355877	0.530794	0.675471	0.241843	0.77096	1	0.179539	0.733476	1.00084	0.723616	1	1.00084	1.00084	1	1	0.651614	1.00084	0.640207	1	1.00084	1.00084	1	0.8615	0.82188	0.548997
Cluster_RGT1	YBL074C	1	1.00211	0.941371	1	1	0.796708	1	1	1	1	1	1	1	1	0.937286	1	1	1	1.00211	1.00211	1	0.716341	1	1	0.55001	0.388632	0.49973	0.801381	1	1	0.960411	1.00211	0.819907	1	1.00211	1.00211	0.399604	1	0.719901	1.00211	0.436431	0.696353	1.00211	1.00211	1	0.264885	0.612187	0.125645
Cluster_RIM101	YBL059W	1	1.00158	0.740763	1	0.119229	0.898562	1	0.0919095	1	1	0.365964	1	0.0863863	0.460088	0.304733	0.526116	1	1	1.00158	1.00158	1	0.230764	1	0.561792	0.397782	0.376592	1	0.741722	1	1	0.961239	1.00158	0.910378	1	1.00158	1.00158	0.317862	1	0.817675	1.00158	0.552126	0.0519553	1.00158	1.00158	1	0.514397	0.692159	0.214171
Cluster_RLM1	YER001W	1	1.00053	0.996254	1	1	0.533425	1	0.160248	1	1	0.140842	0.0892895	1	1	0.49928	1	1	1	1.00053	1.00053	1	0.928462	1	1	0.376787	0.655485	1	0.499839	1	1	0.155626	1.00053	0.552282	1	1.00053	1.00053	1	1	0.975603	1.00053	0.472066	0.257498	1.00053	1.00053	1	0.970187	0.994437	0.300417
Cluster_RME1	YJL148W	1	1.00042	0.923141	1	1	0.456559	1	1	1	1	0.114352	1	1	1	0.424971	0.180472	1	1	1.00042	1.00042	1	0.676521	1	1	1	0.174143	1	0.778238	1	1	0.752115	1.00042	1	1	1.00042	1.00042	0.0969219	1	0.807263	1.00042	0.400104	1	1.00042	1.00042	1	0.319362	0.906595	0.626551
Cluster_RNAPol	YPR010C	0.386357	1.00296	0.570909	1	1	0.921707	1	0.624402	1	0.582888	0.04995	0.0943153	1	0.316448	0.89315	1	1	1	1.00296	1.00296	1	0.959327	1	0.785876	0.929449	0.583097	0.620943	0.69273	1	1	0.874918	1.00296	0.934884	1	1.00296	1.00296	0.510582	0.0794415	0.567242	1.00296	0.437291	0.811634	1.00296	1.00296	1	0.302355	0.502933	0.991128
Cluster_ROX1	YJL148W	1	1.00021	0.960807	1	1	1	1	1	1	1	1	1	1	0.193058	1	1	1	1	1.00021	1.00021	1	0.822527	1	1	1	0.15649	1	0.529039	1	1	1	1.00021	1	1	1.00021	1.00021	1	1	0.898489	1.00021	1	1	1.00021	1.00021	1	0.254574	0.952158	1
Cluster_RPH1	YJL148W	1	1.00095	0.835281	1	1	0.37053	1	1	1	1	0.239137	1	1	0.61926	1	1	1	1	1.00095	1.00095	1	0.41498	1	0.0800673	0.573161	0.0944463	1	0.573327	1	1	0.522056	1.00095	0.764676	1	1.00095	1.00095	1	1	0.617629	1.00095	0.683385	0.414933	1.00095	1.00095	1	0.511273	0.801963	0.891048
Cluster_RPs	YLR075W	0.773946	1.00907	0.495693	1	1	0.549858	0.28982	0.794727	1	0.534376	1.24533e-06	0.797459	1	0.243437	0.202537	0.230467	1	1	1.00907	1.00907	0.100463	0.975582	1	0.479811	0.358709	0.680027	0.556277	0.975321	1	0.878913	0.722923	1.00907	0.380915	1	1.00907	1.00907	0.361396	1	0.346636	1.00907	0.951266	0.0242108	1.00907	1.00907	1	0.447238	0.849462	0.994501
Cluster_rRNAprocessing	YHR069C	1	1.00285	0.900899	1	1	0.0763178	1	0.611015	1	1	0.192602	1	1	0.527449	0.017507	0.039645	1	1	1.00285	1.00285	1	0.269343	1	0.773742	0.222676	0.953891	0.23352	0.0077846	1	1	0.723069	1.00285	0.37235	1	1.00285	1.00285	1	1	0.585508	1.00285	0.644509	0.800045	1.00285	1.00285	1	0.999998	0.861759	0.998716
Cluster_RTG1	YAL029C	1	1.00201	0.683742	1	0.148578	0.772265	1	0.137061	1	0.741932	0.109183	1	1	0.589575	0.0882794	1	1	1	1.00201	1.00201	1	0.156015	1	0.648415	0.52178	0.496483	0.482084	0.0436943	1	0.375161	0.948796	1.00201	0.796685	1	1.00201	1.00201	0.0814461	1	0.36138	1.00201	0.683351	0.677687	1.00201	1.00201	1	0.690763	0.627409	0.817728
Cluster_RTG3	YBR167C	1	1.00063	0.886945	1	1	0.599426	1	0.189083	0.0330223	1	1	1	1	0.117565	0.175715	0.258123	1	1	1.00063	1.00063	1	0.556409	1	1	0.0955075	0.446597	1	0.0818308	1	1	0.876615	1.00063	1	1	1.00063	1.00063	0.141815	1	0.725284	1.00063	0.155383	0.300434	1.00063	1.00063	1	0.894933	0.863203	0.771824
Cluster_RTS2	YDR004W	1	1.00074	0.992336	1	1	0.259404	1	1	1	1	1	0.122744	1	0.528091	1	1	1	1	1.00074	1.00074	1	0.504595	1	1	0.484226	0.57057	1	0.928372	1	1	0.65857	1.00074	0.675398	1	1.00074	1.00074	1	1	0.952197	1.00074	0.200939	1	1.00074	1.00074	1	0.992691	0.842289	0.821651
Cluster_SFL1	YCR083W	1	1.00084	0.852161	1	1	0.315489	1	1	1	0.100228	0.215668	1	1	0.576117	0.669424	0.328432	1	1	1.00084	1.00084	1	0.83355	1	1	1	0.00791224	1	0.482962	1	0.179539	0.733476	1.00084	0.723616	1	1.00084	1.00084	1	1	0.651614	1.00084	0.640207	1	1.00084	1.00084	1	0.64675	0.82188	0.548997
Cluster_SFP1	YAL022C	1	1.00137	0.973667	1	1	0.275489	1	0.365095	1	0.223574	0.326222	1	1	0.752197	0.0035051	0.128853	1	1	1.00137	1.00137	1	0.655508	1	1	0.707707	0.0918917	0.0702312	0.0774955	1	1	0.153817	1.00137	0.302058	1	1.00137	1.00137	1	1	0.85522	1.00137	0.198067	0.539035	1.00137	1.00137	1	0.721014	0.961802	0.133317
Cluster_SIG1	YGR222W	1	1.00148	0.755743	1	1	0.60898	1	1	1	0.631312	0.063984	1	1	1	0.267407	0.14571	1	1	1.00148	1.00148	1	0.254481	1	0.536994	0.734114	0.142056	0.384099	0.864387	1	1	0.828092	1.00148	0.637415	1	1.00148	1.00148	1	1	0.472473	1.00148	0.832956	1	1.00148	1.00148	1	0.0953432	0.70936	0.36563
Cluster_SIP4	YAL010C	1	1.00169	0.726079	1	1	0.398989	1	0.102741	1	0.302131	0.384951	1	1	0.494684	0.342243	0.549151	1	1	1.00169	1.00169	1	0.209254	1	1	0.430307	0.824601	1	0.386044	1	0.326957	0.530272	1.00169	0.20453	1	1.00169	1.00169	1	1	0.424443	1.00169	0.58823	1	1.00169	1.00169	1	0.41619	0.675373	0.711806
Cluster_SKN7	YDR156W	1	1.00074	0.86938	0.0197341	1	1	1	1	1	0.392687	1	0.122744	0.0412686	0.528091	0.620348	1	1	1	1.00074	1.00074	1	0.504595	1	1	0.484226	0.835672	1	0.928372	1	1	0.65857	1.00074	0.279033	1	1.00074	1.00074	1	1	0.687465	1.00074	1	1	1.00074	1.00074	1	0.51002	0.842289	0.47286
Cluster_SKO1	YKL210W	1	1.00074	0.86938	1	1	1	1	0.21693	1	1	1	1	1	1	0.620348	1	1	1	1.00074	1.00074	1	0.978878	1	0.319456	0.125944	0.017704	1	0.928372	1	1	0.65857	1.00074	0.675398	1	1.00074	1.00074	1	1	0.687465	1.00074	0.200939	1	1.00074	1.00074	1	0.780969	0.842289	0.180705
Cluster_SMP1	YER001W	1	1.00095	0.987199	1	1	0.122846	1	1	1	1	1	0.154976	1	1	0.327528	1	1	1	1.00095	1.00095	1	0.798573	1	1	1	0.925949	0.267645	0.573327	1	1	0.522056	1.00095	0.395136	1	1.00095	1.00095	1	1	0.617629	1.00095	0.294782	0.0916484	1.00095	1.00095	1	0.755132	0.801963	0.617024
Cluster_SOK2	YBL029W	1	1.00074	0.86938	1	1	0.259404	1	1	1	0.392687	1	1	1	0.528091	0.22586	1	1	1	1.00074	1.00074	1	0.504595	1	1	1	0.970587	0.0216152	0.144431	1	0.158983	0.340112	1.00074	0.279033	1	1.00074	1.00074	1	1	0.995795	1.00074	1	0.340891	1.00074	1.00074	1	0.51002	0.842289	0.47286
Cluster_sphingolipids	YBR265W	1	1.00074	0.86938	1	1	0.259404	1	1	1	1	1	1	1	0.528091	0.620348	1	1	1	1.00074	1.00074	1	0.86729	1	1	1	0.2813	0.215135	0.69896	1	1	0.912956	1.00074	1	1	1.00074	1.00074	1	1	0.687465	1.00074	0.591146	1	1.00074	1.00074	1	0.51002	0.988687	0.821651
Cluster_SRD1	YBR167C	1	1.00179	0.956391	1	0.134027	1	1	1	1	0.702344	0.0902355	0.272547	0.0973357	0.246049	0.66482	1	1	1	1.00179	1.00179	1	0.793744	1	0.607481	0.799875	0.724033	0.444908	0.657749	1	0.343423	0.915497	1.00179	0.935046	1	1.00179	1.00179	0.35181	1	0.944519	1.00179	0.334027	0.63685	1.00179	1.00179	1	0.515298	0.658992	0.751552
Cluster_STB1	YCR065W	1	1.00053	0.996254	1	1	1	1	0.160248	1	1	1	1	1	0.083899	0.49928	1	1	1	1.00053	1.00053	1	0.928462	1	1	0.376787	0.309863	1	0.181641	1	1	1	1.00053	0.161878	1	1.00053	1.00053	1	1	0.975603	1.00053	0.112255	0.257498	1.00053	1.00053	1	0.818238	0.994437	1
Cluster_STE12	YBR083W	1	1.00074	0.86938	1	1	0.656096	1	0.21693	1	1	0.191477	1	1	0.153862	0.0503523	0.0419608	1	1	1.00074	1.00074	1	0.86729	1	1	0.484226	0.0919994	1	0.0348804	1	1	0.65857	1.00074	1	1	1.00074	1.00074	1	1	0.952197	1.00074	0.200939	0.340891	1.00074	1.00074	1	0.780969	0.842289	0.821651
Cluster_Sterols	YHR190W	0.0591539	1.00243	0.631088	1	1	0.856619	0.0881697	1	1	0.207575	0.502899	1	1	0.200705	0.817095	0.68196	1	1	1.00243	1.00243	1	0.8396	1	0.717942	1	0.426592	0.549153	0.776027	1	0.434127	0.107847	1.00243	0.114126	1	1.00243	1.00243	1	1	0.661214	1.00243	0.132919	0.0407096	1.00243	1.00243	0.00724711	0.51773	0.894028	0.0164313
Cluster_STP1	YBR216C	0.159905	1.00105	0.818734	1	1	0.782402	1	1	1	1	1	1	1	0.270456	0.128768	1	1	1	1.00105	1.00105	1	0.762882	1	1	0.611707	0.355896	0.0433082	0.174668	1	1	0.969447	1.00105	0.79964	1	1.00105	1.00105	0.225043	1	0.90757	1.00105	1	1	1.00105	1.00105	1	0.388213	0.782526	1
Cluster_STP2	YBR040W	1	1.00148	0.755743	1	1	0.316732	0.054609	1	1	1	0.346394	1	1	1	0.556414	0.14571	1	1	1.00148	1.00148	0.0849456	0.620613	1	0.170221	1	0.709469	1	0.114267	1	1	0.828092	1.00148	0.345648	1	1.00148	1.00148	1	1	0.472473	1.00148	0.513838	0.565713	1.00148	1.00148	1	0.618188	0.70936	0.843886
Cluster_SUM1	YAL023C	1	1.00116	0.802513	1	1	0.813199	1	1	1	0.172147	0.283998	1	0.0640945	0.692831	0.425302	1	1	1	1.00116	1.00116	1	0.726911	1	0.453879	1	0.455138	0.316652	0.721466	1	0.238253	0.197911	1.00116	0.501919	1	1.00116	1.00116	1	1	0.554875	1.00116	0.754829	1	1.00116	1.00116	1	0.512401	0.972199	0.203603
Cluster_SWI4	YER001W	1	1.00158	0.740763	1	1	0.647585	1	0.407986	1	1	1	0.244775	1	0.190513	0.595134	1	1	1	1.00158	1.00158	1	0.230764	1	1	0.758137	0.0889762	0.090467	0.158446	1	1	0.261782	1.00158	0.0159206	1	1.00158	1.00158	1	1	0.993722	1.00158	0.0263099	0.0519553	1.00158	1.00158	1	0.944988	0.692159	0.667317
Cluster_SWI5	YAL017W	1	1.00148	0.755743	1	1	0.316732	1	0.0814426	0.00266292	0.249726	0.346394	1	1	1	0.855975	1	1	1	1.00148	1.00148	1	0.864878	1	1	0.0316179	0.991218	1	0.962059	1	0.0445596	1	1.00148	0.345648	1	1.00148	1.00148	1	1	0.472473	1.00148	0.231074	0.565713	1.00148	1.00148	1	0.798134	0.956134	0.617995
Cluster_SWI6	YBR078W	1	1.00084	0.852161	1	1	0.704754	1	0.243825	1	0.434467	1	1	1	0.191908	0.669424	1	1	1	1.00084	1.00084	1	0.457602	1	1	0.530794	0.395734	1	0.482962	1	1	0.733476	1.00084	0.337869	1	1.00084	1.00084	1	1	0.93842	1.00084	0.060593	1	1.00084	1.00084	1	0.64675	0.985155	0.548997
Cluster_TFs	YBL066C	1	1.00042	0.997723	1	1	0.456559	1	1	1	1	1	1	1	1	0.424971	1	1	1	1.00042	1.00042	1	0.676521	1	1	1	0.174143	0.129252	0.372559	1	1	0.338331	1.00042	1	1	1.00042	1.00042	1	1	0.984842	1.00042	1	1	1.00042	1.00042	1	0.939797	0.906595	0.626551
Cluster_THI2	YBL058W	1	1.00084	0.852161	1	0.065446	1	1	0.243825	1	1	1	1	1	1	0.669424	1	1	1	1.00084	1.00084	1	0.83355	1	1	0.530794	0.166866	1	0.77096	1	1	0.733476	1.00084	1	1	1.00084	1.00084	1	1	0.93842	1.00084	1	1	1.00084	1.00084	1	0.966858	0.985155	0.860601
Cluster_Thiamine	YPR121W	1	1.00021	0.99961	1	1	0.26279	1	1	1	1	1	1	1	1	1	1	1	1	1.00021	1.00021	1	0.991348	1	1	0.172309	1	1	1	1	1	0.502075	1.00021	1	1	1.00021	1.00021	1	1	1	1.00021	1	0.112257	1.00021	1.00021	1	0.754585	0.999416	1
Cluster_tRNAprocessing	YNL292W	1	1.00222	0.936021	1	0.162888	0.586858	1	0.161137	1	0.776262	1	1	1	0.645099	0.283644	0.0789811	1	1	1.00222	1.00222	1	0.960109	1	0.0989893	0.114935	0.788377	0.516777	0.504581	1	1	0.134184	1.00222	0.191324	1	1.00222	1.00222	1	1	0.324624	1.00222	0.736202	1	1.00222	1.00222	1	0.683638	0.597333	0.300792
Cluster_tRNAsynth	YDR341C	0.294372	1.00211	0.670183	1	1	0.141584	1	2.77258e-06	1	0.759708	1	1	1	0.332728	0.487677	0.253056	1	1	1.00211	1.00211	1	0.432432	1	0.290452	2.37431e-07	0.995991	0.49973	0.635072	1	1	0.561888	1.00211	0.95993	1	1.00211	1.00211	1	1	0.34251	1.00211	0.922486	0.105457	1.00211	1.00211	1	0.0623546	0.612187	0.450338
Cluster_Tryptophan	YDR354W	1	1.00074	0.86938	1	1	1	1	1	1	0.392687	1	1	1	1	0.0503523	0.29415	1	1	1.00074	1.00074	1	0.504595	1	1	0.125944	0.835672	1	0.144431	1	1	0.118743	1.00074	0.0717792	1	1.00074	1.00074	0.163421	1	0.687465	1.00074	1	1	1.00074	1.00074	1	0.780969	0.842289	0.0448361
Cluster_UGA3	YBR018C	1	1.00158	0.965455	1	1	0.151458	1	1	1	0.275956	1	1	1	0.460088	0.304733	0.162984	1	0.0187964	1.00158	1.00158	1	0.586528	1	1	0.758137	0.0311298	0.405073	0.319651	1	0.31008	0.863473	1.00158	0.675639	1	1.00158	1.00158	1	1	0.447816	1.00158	0.26497	1	1.00158	1.00158	1	0.709005	0.950176	0.871051
Cluster_USV1	YAL001C	1	1.00095	0.835281	1	1	0.37053	1	0.0360377	1	0.473377	1	1	1	1	0.0993084	0.0674744	1	1	1.00095	1.00095	1	0.955968	1	0.390354	0.0406553	0.760002	1	0.116389	1	1	0.956685	1.00095	0.764676	1	1.00095	1.00095	1	1	0.617629	1.00095	0.683385	0.414933	1.00095	1.00095	1	0.755132	0.801963	0.617024
Cluster_Vacuole	YBR127C	0.536082	1.00466	0.414129	1	1	0.431656	1	0.785646	1	0.590965	0.737801	0.561667	1	0.46804	0.338959	0.637174	1	1	1.00466	1.00466	1	0.609559	1	0.420707	0.201889	0.257119	0.782532	0.00749829	1	1	0.789443	1.00466	0.0233951	1	1.00466	1.00466	1	1	0.323825	1.00466	0.435345	0.248341	1.00466	1.00466	1	0.696316	0.339268	0.645493
Node 1	YAR015W	1	1.00053	0.904863	1	1	1	1	1	1	0.299656	0.140842	1	1	0.083899	0.127736	0.0213135	1	1	1.00053	1.00053	1	0.928462	1	1	1	0.0836636	1	0.181641	1	1	0.460135	1.00053	0.552282	1	1.00053	1.00053	1	1	0.975603	1.00053	1	1	1.00053	1.00053	1	0.508588	0.884634	0.708084
Node 10	YCR082W	1	1.00084	0.852161	1	1	1	1	0.243825	1	1	1	1	0.0470258	1	0.669424	1	1	1	1.00084	1.00084	1	0.457602	1	1	0.158254	0.395734	0.241843	0.95086	1	1	1	1.00084	0.337869	1	1.00084	1.00084	1	1	0.651614	1.00084	0.060593	1	1.00084	1.00084	1	0.8615	0.82188	0.860601
Node 11	YOR027W	1	1.00042	0.997723	1	1	1	1	1	1	0.247934	1	1	1	1	0.424971	0.180472	1	1	1.00042	1.00042	1	0.99701	1	1	1	0.517236	1	0.778238	1	1	1	1.00042	0.0116074	1	1.00042	1.00042	1	1	0.984842	1.00042	1	1	1.00042	1.00042	1	1	0.999945	0.626551
Node 12	YDR258C	1	1.00032	0.941787	1	1	0.367041	1	1	1	1	1	1	1	0.275137	0.339645	0.138657	1	1	1.00032	1.00032	1	0.745964	1	1	1	0.779281	1	0.676818	1	1	1	1.00032	0.00326465	1	1.00032	1.00032	1	1	0.851658	1.00032	1	1	1.00032	1.00032	1	0.50687	0.929098	0.522259
Node 13	YDR099W	0.0673023	1.00042	0.923141	1	1	1	1	0.130391	1	0.0257926	1	1	1	1	1	1	1	1	1.00042	1.00042	1	0.954294	1	0.197389	0.314956	0.517236	1	0.778238	1	0.0941877	1	1.00042	1	1	1.00042	1.00042	1	1	0.807263	1.00042	0.400104	1	1.00042	1.00042	1	1	0.906595	0.626551
Node 14	YDR237W	1	1.00137	0.973667	1	1	0.567231	1	0.365095	1	0.604056	0.05592	1	1	0.752197	1	1	1	1	1.00137	1.00137	1	0.655508	1	1	0.330367	0.412665	1	0.948106	1	1	1	1.00137	0.876349	1	1.00137	1.00137	1	1	0.972796	1.00137	1	1	1.00137	1.00137	1	0.721014	0.726987	0.811616
Node 15	YGR076C	1	1.00074	0.86938	1	1	0.656096	1	0.21693	1	1	1	1	1	0.153862	1	1	1	1	1.00074	1.00074	1	0.978878	1	1	0.484226	0.835672	1	0.928372	1	1	1	1.00074	0.279033	1	1.00074	1.00074	1	1	0.952197	1.00074	1	1	1.00074	1.00074	1	0.780969	0.842289	0.821651
Node 16	YER059W	1	1.00021	0.960807	1	1	0.26279	1	1	1	1	1	0.0367152	0.0119659	1	0.24167	0.0947124	1	1	1.00021	1.00021	1	0.822527	1	1	0.172309	1	1	0.529039	1	1	1	1.00021	1	1	1.00021	1.00021	0.0496906	1	0.898489	1.00021	0.225448	1	1.00021	1.00021	1	0.254574	0.952158	1
Node 17	YKL096W	1	1.00032	0.941787	1	1	1	1	1	1	1	0.0870476	1	0.017896	1	0.339645	1	1	1	1.00032	1.00032	1	0.745964	1	1	1	0.779281	1	0.233479	1	1	1	1.00032	1	1	1.00032	1.00032	1	1	0.99215	1.00032	1	1	1.00032	1.00032	1	0.128426	0.929098	0.522259
Node 18	YGR011W
Node 19	YDL210W	1	1.00011	0.980208	1	1	1	1	1	1	1	1	1	1	1	0.129171	1	1	1	1.00011	1.00011	1	0.906938	1	1	1	1	1	0.313717	1	1	1	1.00011	1	1	1.00011	1.00011	1	1	0.947889	1.00011	0.119907	1	1.00011	1.00011	1	0.504579	0.975787	1
Node 2	YLR302C	1	1.00232	0.930514	1	1	1	0.0844988	0.173445	1	0.791677	1	0.0618913	1	0.905783	0.554413	0.289688	1	1	1.00232	1.00232	1	0.66344	1	0.701967	0.318784	0.695844	1	0.381745	1	1	0.170481	1.00232	0.970965	1	1.00232	1.00232	0.429501	1	0.896003	1.00232	0.759687	0.131091	1.00232	1.00232	1	0.0724347	0.984639	0.542204
Node 2_fuzzy0.06	YJR109C	1	1.0037	0.968597	1	1	0.967627	0.00853234	0.0308725	1	0.217666	0.655039	0.136744	1	0.884172	0.67936	0.240165	1	1	1.0037	1.0037	1	0.898563	1	0.85445	0.204258	0.790405	1	0.560628	1	1	0.321069	1.0037	0.784429	1	1.0037	1.0037	0.590782	1	0.966423	1.0037	0.808146	0.141231	1.0037	1.0037	1	0.0962995	0.990267	0.668072
Node 20	YCL075W	1	1.00011	0.980208	1	1	1	1	1	1	1	1	1	1	1	1	1	1	1	1.00011	1.00011	1	0.906938	1	1	1	1	1	1	1	1	0.294347	1.00011	1	1	1.00011	1.00011	1	1	0.947889	1.00011	1	1	1.00011	1.00011	1	1	0.975787	1
Node 21	YKR032W	1	1.00021	0.960807	1	1	0.26279	1	1	1	1	1	1	1	1	0.24167	0.0947124	1	1	1.00021	1.00021	1	0.822527	1	1	0.172309	1	1	0.529039	1	1	0.502075	1.00021	1	1	1.00021	1.00021	0.0496906	1	0.898489	1.00021	1	1	1.00021	1.00021	1	1	0.952158	0.388859
Node 22	YBR064W	1	1.00011	0.980208	1	1	0.141383	1	1	1	1	1	1	1	1	1	1	1	1	1.00011	1.00011	1	0.906938	1	0.0534793	1	0.395621	1	1	1	1	0.294347	1.00011	1	1	1.00011	1.00011	1	1	0.947889	1.00011	1	1	1.00011	1.00011	1	0.504579	0.975787	0.218233
Node 23	YDR220C
Node 24	YJL012C
Node 25	YBR213W
Node 26	YPL276W
Node 27	YCR010C	1	1.00011	0.980208	1	1	0.141383	1	1	1	1	1	1	1	1	1	1	1	1	1.00011	1.00011	1	1	1	1	1	0.395621	1	1	1	1	1	1.00011	1	1	1.00011	1.00011	1	1	0.947889	1.00011	1	1	1.00011	1.00011	1	0.504579	0.975787	1
Node 28	YAL058C-A	1	1.00032	0.941787	1	1	1	1	1	1	1	1	1	1	0.275137	1	1	1	1	1.00032	1.00032	1	0.745964	1	1	0.246999	0.779281	1	0.676818	1	1	1	1.00032	0.382514	1	1.00032	1.00032	1	1	0.851658	1.00032	0.03966	1	1.00032	1.00032	1	0.878442	0.929098	0.12206
Node 29	YIR017C
Node 3	YAR009C	1	1.00063	0.886945	1	1	1	1	1	1	0.347826	1	1	1	0.47463	0.175715	1	1	1	1.00063	1.00063	1	0.556409	1	1	0.433043	0.446597	0.18749	0.28145	1	1	0.24524	1.00063	1	1	1.00063	1.00063	1	1	0.964654	1.00063	0.155383	1	1.00063	1.00063	1	0.113653	0.863203	0.389387
Node 30	YKL163W	1	1.00011	0.980208	1	1	1	1	1	1	1	1	1	1	1	1	1	1	1	1.00011	1.00011	1	0.906938	1	1	1	0.395621	1	1	1	1	1	1.00011	1	1	1.00011	1.00011	1	1	0.947889	1.00011	1	1	1.00011	1.00011	1	1	0.975787	1
Node 31	YDR364C	1	1.00148	0.755743	1	1	0.881831	1	1	1	0.631312	1	1	1	1	0.267407	0.501908	1	1	1.00148	1.00148	1	0.620613	1	0.170221	1	0.991218	0.384099	0.864387	1	0.292782	0.627499	1.00148	0.000300301	1	1.00148	1.00148	0.300229	1	0.836642	1.00148	0.832956	1	1.00148	1.00148	1	0.408684	0.70936	0.843886
Node 32	YGL087C	1	1.00148	0.755743	1	1	0.124267	1	0.386914	1	0.249726	1	1	1	0.424145	0.0261441	0.00371429	1	1	1.00148	1.00148	1	0.620613	1	0.170221	0.734114	0.500575	0.384099	0.255169	1	0.292782	0.627499	1.00148	0.142227	1	1.00148	1.00148	0.300229	1	0.472473	1.00148	0.832956	1	1.00148	1.00148	1	0.915843	0.956134	0.617995
Node 33	YLR102C	1	1.00032	0.941787	1	1	0.367041	1	1	1	0.192399	0.0870476	1	1	1	1	1	1	1	1.00032	1.00032	1	0.975652	1	1	1	0.0618909	1	0.676818	1	1	1	1.00032	1	1	1.00032	1.00032	1	1	0.851658	1.00032	1	1	1.00032	1.00032	1	0.50687	0.929098	0.522259
Node 34	YDL091C
Node 35	YGR294W	1	1.00011	0.980208	1	1	1	1	1	1	1	1	1	1	1	1	1	1	1	1.00011	1.00011	1	0.906938	1	1	1	1	1	1	1	1	1	1.00011	1	1	1.00011	1.00011	1	1	0.947889	1.00011	1	1	1.00011	1.00011	1	1	0.975787	1
Node 36	YDR285W	0.655534	1.00648	0.659035	0.159859	1	0.237488	1	0.349079	1	0.000773595	0.274824	0.31259	1	0.597052	0.258042	0.573997	1	1	1.00648	1.00648	1	0.492983	1	0.226319	0.181297	0.889224	0.879622	0.114755	1	0.0614421	0.999784	1.00648	0.29037	1	1.00648	1.00648	1	1	0.165452	1.00648	0.450989	0.875277	1.00648	1.00648	1	0.528721	0.940108	0.885049
Node 37	YER041W	1	1.00021	0.960807	1	1	0.26279	1	1	1	1	1	1	1	1	1	1	1	1	1.00021	1.00021	1	0.822527	1	0.104104	1	1	1	1	1	1	1	1.00021	1	1	1.00021	1.00021	1	1	0.898489	1.00021	0.225448	1	1.00021	1.00021	1	0.754585	0.952158	0.388859
Node 38	YDR242W	1	1.00021	0.960807	1	1	1	1	1	1	1	0.0589049	1	1	1	1	1	1	1	1.00021	1.00021	1	0.822527	1	1	0.172309	1	1	0.529039	1	1	1	1.00021	1	1	1.00021	1.00021	1	1	0.898489	1.00021	1	1	1.00021	1.00021	1	0.754585	0.952158	1
Node 39	YMR088C	1	1.00169	0.996467	1	1	0.912927	1	1	1	0.680332	1	0.25879	1	1	0.000372874	6.67819e-05	1	1	1.00169	1.00169	1	0.553405	1	0.585264	0.779993	0.0539963	0.425335	0.00233138	1	1	0.0670933	1.00169	0.710513	1	1.00169	1.00169	1	1	0.952531	1.00169	1	0.235583	1.00169	1.00169	1	0.901695	0.943946	0.8938
Node 4	YNL231C
Node 40	YBL111C	1	1.00011	0.980208	1	1	1	1	1	1	1	1	1	1	1	1	1	1	1	1.00011	1.00011	1	0.906938	1	1	1	1	1	0.313717	1	1	0.294347	1.00011	1	1	1.00011	1.00011	1	1	0.947889	1.00011	1	1	1.00011	1.00011	1	1	0.975787	0.218233
Node 41	YMR201C
Node 42	YLR121C	1	1.00021	0.960807	1	1	0.26279	1	1	1	1	1	1	1	1	1	1	1	1	1.00021	1.00021	1	0.822527	1	0.104104	1	1	1	1	1	1	0.502075	1.00021	1	1	1.00021	1.00021	1	1	0.99729	1.00021	0.225448	1	1.00021	1.00021	1	0.754585	0.952158	1
Node 43	YJR153W	1	1.00011	0.980208	1	1	1	1	1	1	1	1	1	1	1	0.129171	0.0485314	1	1	1.00011	1.00011	1	0.906938	1	1	1	0.395621	1	0.313717	1	1	1	1.00011	0.148437	1	1.00011	1.00011	1	1	0.947889	1.00011	1	1	1.00011	1.00011	1	0.504579	0.975787	1
Node 44	YGL146C	1	1.00402	0.99991	1	1	0.920129	1	1	1	0.0136533	0.00515763	0.509377	1	0.757466	0.554903	1	1	1	1.00402	1.00402	1	0.999996	1	0.14337	0.869315	0.43407	0.372355	0.886983	1	0.0021642	0.830443	1.00402	0.935745	1	1.00402	1.00402	1	1	0.999372	1.00402	0.952126	0.377869	1.00402	1.00402	1	0.88401	0.999728	0.939983
Node 45	YPL072W
Node 46	YDR534C	1	1.00011	0.980208	1	1	1	1	1	1	1	1	1	1	1	1	1	1	1	1.00011	1.00011	1	0.906938	1	1	1	1	1	1	1	1	1	1.00011	1	1	1.00011	1.00011	1	1	0.947889	1.00011	1	1	1.00011	1.00011	1	1	0.975787	1
Node 47	YCR106W
Node 48	YDR281C	1	1.00011	0.980208	1	1	1	1	1	1	1	1	1	1	1	0.129171	0.0485314	1	1	1.00011	1.00011	1	0.906938	1	1	0.09022	1	1	0.313717	0.000631645	1	1	1.00011	0.148437	1	1.00011	1.00011	1	1	0.947889	1.00011	1	1	1.00011	1.00011	1	1	0.975787	0.218233
Node 49	YDR217C	1	1.00021	0.960807	1	1	0.26279	1	1	1	1	0.00089083	1	1	1	0.24167	0.0947124	1	1	1.00021	1.00021	1	0.822527	1	1	1	0.634751	0.0668544	0.529039	1	1	1	1.00021	0.0220201	1	1.00021	1.00021	1	1	0.898489	1.00021	1	1	1.00021	1.00021	1	1	0.952158	1
Node 5	YGR284C	1	1.00021	0.960807	1	1	1	1	1	1	1	1	1	1	1	1	1	1	1	1.00021	1.00021	1	0.822527	1	1	1	0.15649	1	1	1	1	1	1.00021	1	1	1.00021	1.00021	1	1	0.898489	1.00021	1	1	1.00021	1.00021	1	1	0.952158	0.388859
Node 50	YBR092C
Node 51	YPL011C	1	1.00011	0.980208	1	1	1	1	1	1	1	0.0298979	1	1	1	1	1	1	1	1.00011	1.00011	1	0.906938	1	1	1	0.395621	1	1	1	1	0.294347	1.00011	1	1	1.00011	1.00011	1	1	0.947889	1.00011	1	1	1.00011	1.00011	1	1	0.975787	1
Node 52	YOR371C	1	1.00011	0.980208	1	1	1	1	1	1	1	1	1	1	1	1	1	1	1	1.00011	1.00011	1	0.906938	1	1	1	0.395621	1	1	1	1	1	1.00011	1	1	1.00011	1.00011	1	1	0.947889	1.00011	1	1	1.00011	1.00011	1	1	0.975787	1
Node 53	YER064C
Node 54	YGR055W
Node 55	YDL095W	1	1.00032	0.998846	1	1	0.367041	1	1	1	1	1	1	1	1	1	1	1	1	1.00032	1.00032	1	0.975652	1	1	1	1	1	0.676818	1	1	1	1.00032	0.382514	1	1.00032	1.00032	1	1	0.99215	1.00032	1	1	1.00032	1.00032	1	0.50687	0.998277	1
Node 56	YDL095W	1	1.00032	0.998846	1	1	0.367041	1	1	1	1	1	1	1	1	1	1	1	1	1.00032	1.00032	1	0.975652	1	1	1	1	1	0.676818	1	1	1	1.00032	0.382514	1	1.00032	1.00032	1	1	0.99215	1.00032	1	1	1.00032	1.00032	1	0.50687	0.998277	1
Node 57	YDR429C	1	1.00021	0.960807	1	1	0.26279	1	1	1	1	1	1	1	1	0.24167	0.0947124	1	1	1.00021	1.00021	1	0.822527	1	1	1	1	1	0.529039	1	1	0.502075	1.00021	0.274853	1	1.00021	1.00021	1	1	0.898489	1.00021	1	1	1.00021	1.00021	1	1	0.952158	0.0476079
Node 58	YJL034W	1	1.00042	0.923141	1	1	1	1	1	1	0.247934	1	1	1	0.348875	1	1	1	1	1.00042	1.00042	1	0.99701	1	1	1	0.174143	1	1	1	0.0941877	0.338331	1.00042	0.107455	1	1.00042	1.00042	1	1	0.807263	1.00042	1	0.211932	1.00042	1.00042	1	0.939797	0.906595	1
Node 59	YDR400W	1	1.00042	0.923141	1	1	1	1	1	1	1	1	1	1	0.348875	1	1	1	1	1.00042	1.00042	1	0.99701	1	1	1	0.174143	1	0.778238	1	1	0.0794462	1.00042	0.474201	1	1.00042	1.00042	0.0969219	1	0.807263	1.00042	0.400104	0.211932	1.00042	1.00042	1	0.319362	0.906595	1
Node 6	YKL213C	1	1.00074	0.992336	1	1	0.656096	1	1	1	0.392687	1	1	1	0.153862	1	1	1	1	1.00074	1.00074	1	0.504595	1	0.319456	0.484226	0.57057	1	0.928372	1	0.158983	0.912956	1.00074	0.279033	1	1.00074	1.00074	1	1	0.687465	1.00074	1	0.340891	1.00074	1.00074	1	0.940518	0.842289	0.47286
Node 60	YHR142W	1	1.00021	0.960807	1	1	1	1	1	1	1	1	1	1	1	0.24167	0.0947124	1	1	1.00021	1.00021	1	0.822527	1	1	1	1	1	0.529039	1	1	1	1.00021	0.274853	1	1.00021	1.00021	0.0496906	1	0.898489	1.00021	1	1	1.00021	1.00021	1	0.254574	0.952158	0.388859
Node 61	YKR042W	1	1.00042	0.997723	1	1	1	1	1	1	1	1	1	1	1	1	1	1	1	1.00042	1.00042	1	0.954294	1	0.197389	1	0.86663	1	1	1	1	0.338331	1.00042	1	1	1.00042	1.00042	1	1	0.807263	1.00042	1	0.211932	1.00042	1.00042	1	1	0.906595	0.209382
Node 62	YLR263W
Node 63	YGL157W	1	1.00053	0.904863	1	1	1	1	0.160248	1	1	1	1	1	1	0.49928	1	1	1	1.00053	1.00053	1	0.993042	1	1	0.376787	0.655485	1	0.499839	1	1	0.460135	1.00053	1	1	1.00053	1.00053	1	1	0.765179	1.00053	1	1	1.00053	1.00053	1	0.193211	0.884634	0.0728304
Node 64	YJL052W
Node 65	YLR045C	1	1.00053	0.904863	1	1	1	1	1	1	1	1	1	1	0.415119	0.49928	1	1	1	1.00053	1.00053	1	0.613536	1	1	1	0.309863	0.158873	0.499839	1	1	0.82511	1.00053	1	1	1.00053	1.00053	1	1	0.765179	1.00053	1	0.257498	1.00053	1.00053	1	0.508588	0.884634	0.708084
Node 66	YFR025C	1	1.00011	1	1	1	1	1	1	1	1	1	1	1	1	1	1	1	1	1.00011	1.00011	1	0.906938	1	1	1	1	1	1	1	1	0.294347	1.00011	1	1	1.00011	1.00011	1	1	0.947889	1.00011	1	1	1.00011	1.00011	1	1	0.975787	1
Node 67	YKR003W	1	1.00275	0.594263	1	0.197633	0.899965	1	1	0.135554	0.542089	0.546273	0.0830327	1	0.268942	0.239118	0.129691	1	1	1.00275	1.00275	0.152078	0.911942	1	0.408728	0.914716	0.46032	0.593707	0.432177	1	0.474684	0.514277	1.00275	0.764142	1	1.00275	1.00275	0.138332	1	0.248244	1.00275	0.0826582	0.187762	1.00275	1.00275	1	0.0161571	0.528276	0.0151871
Node 68	YKR003W	1	1.00201	0.683742	1	1	0.516033	1	1	1	0.37924	1	1	1	0.589575	0.223868	0.611765	1	1	1.00201	1.00201	1	0.460823	1	1	1	0.496483	0.135016	0.578027	1	0.0773674	0.988207	1.00201	0.308639	1	1.00201	1.00201	1	1	0.926726	1.00201	0.911901	0.301283	1.00201	1.00201	1	0.190156	0.627409	0.817728
Node 69	YOR143C	1	1.00011	0.980208	1	1	0.141383	1	1	1	1	1	1	1	1	1	1	1	1	1.00011	1.00011	1	0.906938	1	1	0.09022	1	1	1	1	1	0.294347	1.00011	1	1	1.00011	1.00011	1	1	1	1.00011	1	0.0577956	1.00011	1.00011	1	0.504579	0.975787	1
Node 7	YLR201C	0.854402	1.01178	0.933022	1	1	0.205293	1	0.525104	1	0.88264	0.845873	0.608379	0.486188	0.973336	0.249881	0.0860115	1	1	1.01178	1.01178	1	0.674679	1	0.069396	0.787119	0.576571	0.89299	0.265746	1	0.506135	0.401588	1.01178	0.272257	0.120316	1.01178	1.01178	0.299862	1	0.65074	1.01178	0.923305	0.617165	1.01178	1.01178	1	0.778712	0.999678	0.0687921
Node 70	YOL018C	1	1.00042	0.923141	1	1	0.000398038	1	1	1	0.247934	1	1	1	0.348875	1	1	1	1	1.00042	1.00042	1	0.676521	1	0.197389	1	1	1	0.778238	1	1	0.338331	1.00042	1	1	1.00042	1.00042	1	1	0.984842	1.00042	0.400104	1	1.00042	1.00042	1	0.939797	0.906595	0.626551
Node 71	YHR007C
Node 72	YHR108W	0.267861	1.01639	0.192555	0.353474	1	0.581702	1	0.015456	1	0.475322	0.00198158	1	1	0.09012	0.237701	0.459013	1	1	1.01639	1.01639	0.249373	0.929099	1	0.829905	0.00468809	0.539997	0.146324	0.578684	1	0.889892	0.652385	1.01639	0.32049	0.162669	1.01639	1.01639	0.89952	0.363849	0.0962823	1.01639	0.658616	0.383084	1.01639	1.01639	1	0.00289447	0.836742	0.251753
Node 73	YLR400W	0.852128	1.0384	0.625127	1	0.948812	0.145319	0.403969	0.404997	0.578814	0.593442	1.28535e-07	0.62087	0.342674	0.46113	0.00153058	0.016975	1	1	1.0384	1.0384	0.173018	0.958117	1.00002	0.831935	0.00262953	0.891508	0.0798513	0.00335089	1	0.92845	0.927748	1.0384	0.0435324	1	1.0384	1.0384	0.938977	0.27054	0.0255427	1.0384	0.97058	0.43513	1.0384	1.0384	1	0.525416	0.867581	0.849774
Node 74	YDR397C	1	1.00021	0.960807	1	1	0.26279	1	1	1	1	1	0.0367152	1	1	1	1	1	1	1.00021	1.00021	1	0.822527	1	1	0.172309	1	1	0.529039	1	1	0.502075	1.00021	0.274853	1	1.00021	1.00021	1	1	0.898489	1.00021	1	1	1.00021	1.00021	1	1	0.952158	1
Node 75	YOR236W	1	1.00021	0.960807	1	1	0.26279	1	1	1	1	1	1	1	1	1	1	1	1	1.00021	1.00021	1	0.822527	1	1	1	0.634751	1	0.529039	1	1	0.502075	1.00021	1	1	1.00021	1.00021	0.0496906	1	0.898489	1.00021	0.225448	1	1.00021	1.00021	1	0.254574	0.952158	0.388859
Node 76	YNL210W	1	1.00032	0.941787	1	1	1	1	0.0994753	1	1	0.0870476	0.0545669	1	1	1	1	1	1	1.00032	1.00032	1	0.745964	1	1	0.246999	1	1	1	1	1	0.208889	1.00032	1	1	1.00032	1.00032	1	1	0.851658	1.00032	0.318342	0.163575	1.00032	1.00032	1	0.50687	0.929098	1
Node 77	YHR179W	1	1.00011	0.980208	1	1	1	1	1	1	1	1	1	1	1	1	1	1	1	1.00011	1.00011	1	0.906938	1	1	1	1	1	1	1	1	1	1.00011	1	1	1.00011	1.00011	1	1	0.947889	1.00011	1	1	1.00011	1.00011	1	0.504579	0.975787	1
Node 78	YDR086C
Node 79	YDL236W	1	1.00032	0.941787	1	1	1	1	1	1	1	1	1	1	1	0.339645	0.138657	1	1	1.00032	1.00032	1	0.975652	1	0.152026	1	0.34569	1	0.676818	1	1	1	1.00032	1	1	1.00032	1.00032	1	1	0.851658	1.00032	0.03966	0.163575	1.00032	1.00032	1	0.878442	0.929098	0.522259
Node 8	YML116W	1	1.00434	0.805531	1	1	0.706976	1	0.761857	1	1	1	1	0.219086	0.930945	0.0742841	0.320398	1	1	1.00434	1.00434	1	0.0944154	1	0.652265	0.979457	0.147093	0.162173	0.407253	1	1	0.56823	1.00434	0.0328719	1	1.00434	1.00434	0.649017	1	0.362036	1.00434	0.88458	0.425379	1.00434	1.00434	1	0.948296	0.923709	0.165779
Node 80	YJR139C	1	1.00095	0.835281	1	1	0.746532	1	1	0.0491298	0.123189	0.0279105	1	1	0.230973	0.712161	0.361051	1	1	1.00095	1.00095	1	0.41498	1	1	0.0406553	0.989267	1	0.573327	1	0.199594	0.793882	1.00095	0.395136	1	1.00095	1.00095	1	1	0.617629	1.00095	1	1	1.00095	1.00095	1	0.511273	0.801963	0.310903
Node 81	YLR180W	1	1.00074	0.992336	1	1	0.259404	0.0276777	1	1	0.392687	0.0169361	1	1	0.528091	0.22586	1	1	1	1.00074	1.00074	1	0.86729	1	1	0.484226	0.57057	0.215135	0.144431	1	1	0.118743	1.00074	1	1	1.00074	1.00074	1	1	0.952197	1.00074	1	1	1.00074	1.00074	1	0.51002	0.988687	0.47286
Node 82	YBL002W	1	1.00053	0.904863	1	1	1	1	1	1	1	1	1	1	1	0.49928	1	1	1	1.00053	1.00053	1	0.613536	1	1	1	0.919416	0.158873	0.499839	1	1	0.460135	1.00053	0.552282	1	1.00053	1.00053	1	1	0.765179	1.00053	0.000930431	1	1.00053	1.00053	1	0.193211	0.884634	1
Node 83	YLR049C	1	1.00011	0.980208	1	1	1	1	1	1	1	1	1	1	1	1	1	1	1	1.00011	1.00011	1	0.906938	1	1	1	0.395621	1	1	1	1	1	1.00011	1	1	1.00011	1.00011	1	1	0.947889	1.00011	1	1	1.00011	1.00011	1	0.504579	0.975787	1
Node 84	YLR049C	1	1.00011	0.980208	1	1	1	1	1	1	1	1	1	1	1	1	1	1	1	1.00011	1.00011	1	0.906938	1	1	0.09022	0.395621	1	1	1	1	0.294347	1.00011	1	1	1.00011	1.00011	1	1	0.947889	1.00011	1	1	1.00011	1.00011	1	0.504579	0.975787	1
Node 85	YPL158C	1	1.00116	0.980945	1	1	0.0123493	1	0.319107	1	1	1	1	1	1	0.781784	0.421624	1	1	1.00116	1.00116	1	0.985573	1	1	0.0697727	0.455138	1	0.721466	1	1	0.87942	1.00116	0.216376	1	1.00116	1.00116	1	1	0.890798	1.00116	0.136301	1	1.00116	1.00116	1	0.284723	0.763559	0.728821
Node 86	YOR263C
Node 87	YER019W	1	1.00021	0.960807	1	1	1	1	1	1	1	1	1	1	0.193058	1	1	1	1	1.00021	1.00021	1	0.822527	1	0.104104	1	0.634751	1	0.529039	1	1	1	1.00021	0.274853	1	1.00021	1.00021	1	1	0.898489	1.00021	0.225448	1	1.00021	1.00021	1	0.754585	0.952158	0.388859
Node 88	YHR215W	1	1.00011	0.980208	1	1	1	0.00400042	1	1	1	1	1	1	1	1	1	1	1	1.00011	1.00011	1	0.906938	1	1	1	1	1	0.313717	1	1	1	1.00011	0.148437	1	1.00011	1.00011	1	1	0.947889	1.00011	1	1	1.00011	1.00011	1	0.504579	0.975787	1
Node 89	YHR085W	1	1.00042	0.923141	1	1	1	1	1	1	1	0.00513571	1	1	1	0.424971	0.180472	1	1	1.00042	1.00042	1	0.954294	1	1	0.314956	0.86663	1	0.778238	1	1	0.752115	1.00042	1	1	1.00042	1.00042	1	1	0.807263	1.00042	1	1	1.00042	1.00042	1	1	0.906595	1
Node 9	YGL091C	1	1.00116	0.802513	1	1	1	1	0.319107	1	0.54336	0.0410003	0.18603	1	0.692831	0.425302	1	1	1	1.00116	1.00116	1	0.726911	1	0.453879	0.26102	0.455138	0.0517667	0.90425	1	1	1	1.00116	0.216376	1	1.00116	1.00116	1	1	0.554875	1.00116	0.0339334	1	1.00116	1.00116	1	0.892648	0.763559	1
Node 90	YGL235W	1	1.00296	0.570909	1	1	1	1	0.624402	1	0.302073	0.203575	0.408096	0.155292	0.950579	0.89315	0.752166	1	1	1.00296	1.00296	0.162786	0.886845	1	1	0.732939	0.0937602	0.620943	0.238205	1	0.500101	0.76058	1.00296	0.614279	1	1.00296	1.00296	0.155856	0.0794415	0.944655	1.00296	0.437291	1	1.00296	1.00296	1	0.915652	0.502933	0.763171
[truncated: 42 more columns]
