# Supplementary material for: Conservation and Evolution of Cis-Regulatory Systems in Ascomycete Fungi
Source: PLOS journal article supplement (doi:10.1371/journal.pbio.0020398), 2004-11-05
Supplement: S49 (10.1371/journal.pbio.0020398.s049) [file 10-4.1371_journal.pbio.0020398.sd049.xls]

## Sheet: Scas_KaByClusters
	Branch lengths from S.c.		0.413	0.476	0.887	1.308	1.329	1.242	1.217
Cluster order in Figure 1	Node Name	# Scerevisiae genes in cluster	#Scas orthologs	#Sklu orthologs	#C. albicans orthologs	#N.crassa orthologs	#M.grisea orthologs	#A.nidulans orthologs	#S.pombe orthologs
1	Cluster_ManualG1genes	69	47	24	41	31	30	31	30
2	Cluster_RPs	136	52	48	60	88	77	85	93
3	Node 73	573	348	256	356	363	339	345	331
4	Cluster_Proteasome	31	27	18	25	30	27	28	27
5	Cluster_GCN4	30	21	19	24	22	23	21	21
6	Node 2_fuzzy0.06	49	37	31	32	32	34	35	32
7	Node 2	33	26	20	23	22	23	22	21
8	Cluster_ManualMethionine	27	21	17	20	19	19	20	16
9	Cluster_CBF1	23	14	8	12	11	11	12	10
10	Cluster_MET31	17	10	10	9	11	11	9	9
11	Cluster_MET4	20	18	12	13	15	15	13	9
12	Cluster_ManualYap1Targets	72	40	30	34	33	31	28	21
13	Node 8	83	49	46	41	43	45	41	24
14	Node 7	228	143	112	114	105	110	110	65
15	Cluster_Sterols	27	22	17	23	24	23	23	20
16	Cluster_GCR1	14	12	8	7	7	7	4	6
17	Cluster_GCR2	21	17	8	10	10	7	8	6
18	Node 64	11	6	3	6	6	5	5	6
19	Cluster_Mating	26	16	13	7	8	8	8	8
20	Cluster_STE12	21	14	9	13	8	7	7	6
21	Cluster_HAP2	21	17	14	12	15	15	14	12
22	Cluster_HAP3	26	19	17	18	17	17	13	11
23	Cluster_HAP4	27	17	17	17	19	22	19	19
24	Cluster_HAP5	28	25	16	19	16	16	15	9
25	Node 45	70	39	38	36	36	40	38	30
26	Cluster_adata-Respiration	41	24	23	22	26	25	25	27
27	Cluster_FKH2	39	27	14	20	20	17	22	16
28	Cluster_adata-EGT2	27	10	12	7	5	2	5	1
29	Cluster_ManualM-G1genes	12	7	4	4	5	3	2	2
30	Cluster_ManualAFT1targets	17	2	4	4	4	2	2	2
31	Cluster_adata-Chaperones	24	12	13	11	10	7	11	11
32	Cluster_HSF1	24	16	11	14	14	11	12	11
33	Cluster_primig-EarlySpo	57	30	17	25	20	24	23	16
34	Cluster_primig-MidSpo	42	25	17	19	20	16	20	14
35	Cluster_Purine	23	15	15	16	16	15	15	14
36	Node 1	6	4	4	5	5	5	5	6
37	Cluster_Phospholipid	35	23	16	22	21	17	20	15
38	Cluster_primig-LateSpo	182	111	76	69	53	51	51	35
39	Cluster_Proline	4	4	2	4	4	3	3	3
40	Cluster_PUT3	30	19	13	19	16	15	14	12
41	Cluster_MCM1	27	18	6	16	11	8	11	11
42	Node 39	36	26	16	23	20	21	16	12
43	Cluster_GAL4	14	8	4	8	8	6	6	6
44	Cluster_Galactose	7	5	1	3	4	4	4	3
45	Cluster_REB1	30	23	14	23	18	17	21	21
46	Node 36	182	90	67	67	67	63	61	39
47	Node 48	6	2	1	0	1	1	1	2
48	Cluster_ManualZAP1targets	41	23	20	18	14	12	14	13
49	Cluster_ManualZAP1targets-2	85	50	47	47	36	34	38	30
50	Cluster_Isoleucine	7	6	4	6	6	6	6	5
51	Cluster_LEU3	19	13	9	11	10	10	10	10
52	Cluster_Leucine	5	3	3	5	4	3	4	3
53	Cluster_MAC1	19	10	7	10	8	10	10	7
